# Supplementary material for: Design, characterization, and modeling of microcirculation systems with integrated oxygenators
Source: Copernicus journal article supplement (doi:10.5194/jsss-5-221-2016), 2016-06-24
Supplement: Supplementary file 1 [file jsss-5-221-2016-supplement.zip]

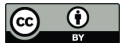

## *Supplement of*

# **Design, characterization, and modeling of microcirculation systems with integrated oxygenators**

**M. Busek et al.**

*Correspondence to:* Mathias Busek ([mathias.busek@iws.fraunhofer.de](mailto:mathias.busek@iws.fraunhofer.de))

- [jsss-5-221-2016-supplement-title-page.pdf](#)
- Messdaten
  - O2-SpotB-17.02.2016.xls
  - O2-Vorversuch-27.01.2016.xls
  - PIV-nachOxy.xlsx
- Modell
  - Errorfunktion.xls
  - Koxy-Vergleich-ModellansÐtze.xls
  - Variantenrechnungen.xls
  - Vergleich-Model-Messwerte.xls
  - Verhalten-Membran.xls
  - flow-profile.csv

The copyright of individual parts of the supplement might differ from the CC-BY 3.0 licence.
