# Supplementary material for: Design, characterization, and modeling of microcirculation systems with integrated oxygenators
Source: Copernicus journal article supplement (doi:10.5194/jsss-5-221-2016), 2016-06-24
Supplement: Supplementary file 1 [file O2-SpotB-17.02.2016.xls]

## Sheet: O2-low-2.4-fwd
Colibri Photonics GmbH Ibidi-OPAL	Dezimaltrennzeichen: Komma				spot:	B	gasflow:	low	pumppress:	50 kPa
2016-02-17	1899-12-31 18:10:48				frequency:	2.4 Hz	dir:	fwd	pumpvac:	-50 kPa
tau100 = 21,398 Âµs @ 20 Â°C	tau0 = 59,000 Âµs @ 20 Â°C	f = 0,75			pumpgas:	O2
T-Korr von tau100 = -0,0272 Âµs / Â°C	T-Korr von tau0 = -0,0203 Âµs / Â°C
Freq 1 = 11,993 kHz	Freq 2 = 6,323 kHz
Zeit / s	O2-Gehalt / %-Luft	tau / Âµs	T / Â°C	Phase1 / Â° @ 11,993 kHz	Phase2 / Â° @ 6,323 kHz	Amplitude1 / V p-p	Amplitude2 / V p-p	Signal : Untergrund		t korrigiert	O2 Gehalt
1	100.6	21.364	20	47.34	34.57	0.336	0.4495	7.43		1
2	101.2	21.328	20	47.35	34.55	0.3362	0.4496	7.46		2
3	100.9	21.347	20	47.35	34.57	0.3362	0.4496	7.45		3
4	101.1	21.335	20	47.33	34.55	0.3362	0.4496	7.44		4
5	101.6	21.311	20	47.37	34.55	0.3362	0.4496	7.48		5
6	101.6	21.31	20	47.34	34.54	0.3362	0.4497	7.46		6
7	101.3	21.328	20	47.34	34.55	0.3361	0.4493	7.45		7
8	101.7	21.301	20	47.33	34.53	0.3362	0.4494	7.46		8
9	101.5	21.315	20	47.33	34.53	0.3361	0.4493	7.44		9
10	100.9	21.349	20	47.34	34.56	0.3361	0.4493	7.43		10
11	100.9	21.347	20	47.31	34.55	0.336	0.4492	7.42		11
12	101.2	21.332	20	47.34	34.55	0.3359	0.4491	7.44		12
13	101.5	21.315	20	47.32	34.53	0.336	0.4492	7.44		13
14	101.9	21.293	20	47.34	34.52	0.336	0.4491	7.47		14
15	101.3	21.324	20	47.32	34.53	0.3359	0.4491	7.43		15
16	101.7	21.301	20	47.3	34.51	0.3359	0.449	7.44		16
17	101.2	21.329	20	47.32	34.54	0.3359	0.4489	7.43		17
18	101.6	21.307	20	47.3	34.51	0.3359	0.4489	7.43		18
19	101.8	21.298	20	47.31	34.51	0.336	0.4488	7.44		19
20	101.6	21.309	20	47.31	34.52	0.3359	0.4489	7.44		20
21	101.7	21.301	20	47.3	34.51	0.3357	0.4489	7.43		21
22	101.9	21.294	20	47.32	34.52	0.3359	0.4489	7.46		22
23	101.5	21.313	20	47.3	34.52	0.3358	0.449	7.43		23
24	101.2	21.329	20	47.35	34.56	0.3359	0.4492	7.46		24
25	100.8	21.353	20	47.37	34.58	0.3361	0.4495	7.46		25
26	100.3	21.38	20	47.4	34.62	0.3361	0.4497	7.47		26
27	99.9	21.406	20	47.48	34.68	0.3365	0.4505	7.52		27
28	99.8	21.409	20	47.5	34.69	0.3368	0.4511	7.53		28
29	98.8	21.464	20	47.59	34.77	0.337	0.4517	7.57		29
30	98.2	21.502	20	47.64	34.83	0.3374	0.4525	7.59		30
31	97.3	21.551	20	47.73	34.91	0.3376	0.4531	7.63		31
32	96.4	21.605	20	47.8	34.98	0.3381	0.454	7.66		32
33	95.2	21.682	20	48.01	35.15	0.3388	0.4558	7.8		33
34	94.6	21.719	20	48.08	35.21	0.3393	0.4567	7.83		34
35	93.6	21.779	20	48.18	35.31	0.3398	0.4579	7.89		35
36	92.5	21.848	20	48.28	35.41	0.3402	0.4589	7.93		36
37	92	21.88	20	48.39	35.49	0.3408	0.4597	8.01		37
38	90.9	21.955	20	48.5	35.6	0.3412	0.4609	8.06		38
39	90.1	22.012	20	48.59	35.68	0.3417	0.462	8.11		39
40	89.3	22.061	20	48.71	35.78	0.3421	0.4631	8.19		40
41	88.4	22.126	20	48.82	35.88	0.3426	0.4641	8.24		41
42	88.1	22.144	20	48.91	35.94	0.343	0.465	8.31		42
43	87.2	22.207	20	49.02	36.04	0.3434	0.4662	8.38		43
44	86.4	22.265	20	49.11	36.13	0.3438	0.4671	8.42		44
45	85	22.371	20	49.2	36.25	0.3443	0.4681	8.44		45
46	84.5	22.408	20	49.3	36.33	0.3446	0.469	8.52		46
47	84.2	22.431	20	49.4	36.4	0.3451	0.4701	8.6		47
48	83.5	22.486	20	49.51	36.49	0.3454	0.4709	8.67		48
49	82.8	22.535	20	49.59	36.57	0.3459	0.472	8.72		49
50	81.9	22.606	20	49.7	36.68	0.3464	0.473	8.78		50
51	81.6	22.634	20	49.8	36.75	0.3468	0.4739	8.86		51
52	80.7	22.702	20	49.87	36.83	0.3471	0.4747	8.88		52
53	80.6	22.712	20	49.97	36.89	0.3475	0.4758	8.98		53
54	79.5	22.797	20	50.03	36.98	0.3477	0.4765	8.98		54	100.6
55	78.7	22.863	20	50.14	37.08	0.3483	0.4775	9.05		55	101.2
56	78.6	22.872	20	50.21	37.13	0.3485	0.4782	9.12		56	100.9
57	78	22.923	20	50.29	37.2	0.3489	0.4793	9.16		57	101.1
58	77.1	23.004	20	50.36	37.3	0.3493	0.48	9.19		58	101.6
59	76.8	23.034	20	50.43	37.36	0.3495	0.4805	9.24		59	101.6
60	76.6	23.051	20	50.53	37.42	0.3499	0.4815	9.33		60	101.3
61	76.1	23.095	20	50.57	37.47	0.3501	0.4821	9.35		61	101.7
62	75.6	23.14	20	50.67	37.55	0.3505	0.4831	9.42		62	101.5
63	75	23.189	20	50.71	37.61	0.3507	0.4835	9.43		63	100.9
64	74.6	23.224	20	50.78	37.67	0.351	0.4845	9.48		64	100.9
65	74.2	23.269	20	50.85	37.73	0.3513	0.4849	9.53		65	101.2
66	73.6	23.317	20	50.89	37.78	0.3516	0.4856	9.54		66	101.5
67	73.4	23.342	20	50.96	37.84	0.3534	0.4882	9.6		67	101.9
68	73.2	23.355	20	51.01	37.88	0.3519	0.4866	9.65		68	101.3
69	73	23.377	20	51.08	37.93	0.3521	0.4871	9.71		69	101.7
70	72.4	23.438	20	51.12	37.99	0.3527	0.4882	9.72		70	101.2
71	72.2	23.453	20	51.17	38.03	0.3538	0.4898	9.77		71	101.6
72	72.5	23.428	20	51.24	38.05	0.3534	0.4898	9.87		72	101.8
73	71.7	23.505	20	51.26	38.11	0.3532	0.4896	9.83		73	101.6
74	71.3	23.54	20	51.32	38.17	0.3544	0.4916	9.87		74	101.7
75	71.1	23.561	20	51.34	38.19	0.3553	0.4931	9.87		75	101.9
76	70.9	23.583	20	51.41	38.24	0.3534	0.4906	9.94		76	101.5
77	70.5	23.618	20	51.45	38.28	0.3536	0.491	9.96		77	101.2
78	70.5	23.624	20	51.49	38.31	0.3537	0.4914	10		78	100.8
79	70.1	23.663	20	51.55	38.37	0.3548	0.493	10.05		79	100.3
80	70	23.672	20	51.59	38.4	0.3541	0.4923	10.09		80	99.9
81	69.7	23.704	20	51.64	38.44	0.3546	0.4932	10.12		81	99.8
82	69.4	23.729	20	51.67	38.48	0.3546	0.4934	10.15		82	98.8
83	69.1	23.763	20	51.71	38.52	0.3541	0.4929	10.16		83	98.2
84	69	23.772	20	51.77	38.56	0.3547	0.494	10.23		84	97.3
85	68.7	23.81	20	51.78	38.59	0.3544	0.4938	10.22		85	96.4
86	68.5	23.829	20	51.83	38.63	0.3545	0.494	10.26		86	95.2
87	68	23.877	20	51.85	38.67	0.3551	0.4951	10.25		87	94.6
88	67.9	23.896	20	51.89	38.7	0.3552	0.4953	10.29		88	93.6
89	67.7	23.916	20	51.92	38.73	0.3555	0.496	10.31		89	92.5
90	67.6	23.928	20	51.94	38.75	0.3553	0.496	10.32		90	92
91	67.7	23.918	20	51.99	38.77	0.3552	0.4959	10.4		91	90.9
92	67	23.994	20	52.01	38.83	0.3555	0.4964	10.36		92	90.1
93	67	23.987	20	52.06	38.85	0.3556	0.4967	10.42		93	89.3
94	66.8	24.01	20	52.12	38.9	0.3564	0.4982	10.48		94	88.4
95	66.8	24.01	20	52.12	38.9	0.3563	0.4979	10.49		95	88.1
96	66.2	24.082	20	52.16	38.97	0.3559	0.4978	10.48		96	87.2
97	66.1	24.087	20	52.22	39.01	0.3561	0.4984	10.56		97	86.4
98	65.9	24.112	20	52.25	39.04	0.3562	0.4986	10.58		98	85
99	66	24.101	20	52.28	39.05	0.3564	0.4989	10.63		99	84.5
100	65.5	24.158	20	52.33	39.11	0.3566	0.4996	10.64		100	84.2
101	65.3	24.178	20	52.34	39.13	0.3569	0.5	10.63		101	83.5
102	65.1	24.203	20	52.38	39.16	0.3567	0.4999	10.66		102	82.8
103	65	24.216	20	52.41	39.19	0.3572	0.5005	10.69		103	81.9
104	64.9	24.229	20	52.42	39.21	0.3575	0.5013	10.7		104	81.6
105	64.6	24.257	20	52.48	39.25	0.3574	0.5013	10.75		105	80.7
106	64.8	24.233	20	52.49	39.24	0.3573	0.5012	10.79		106	80.6
107	64.4	24.286	20	52.52	39.3	0.3572	0.5014	10.79		107	79.5
108	64.3	24.295	20	52.54	39.31	0.3575	0.5017	10.81		108	78.7
109	64.4	24.283	20	52.59	39.33	0.3576	0.5022	10.88		109	78.6
110	63.8	24.354	20	52.59	39.38	0.3578	0.5028	10.82		110	78
111	64	24.333	20	52.63	39.38	0.358	0.5028	10.89		111	77.1
112	63.7	24.368	20	52.66	39.42	0.3578	0.5029	10.9		112	76.8
113	63.6	24.372	20	52.66	39.42	0.3578	0.5029	10.9		113	76.6
114	63.5	24.389	20	52.69	39.45	0.3579	0.5032	10.93		114	76.1
115	63.3	24.416	20	52.73	39.49	0.358	0.5035	10.95		115	75.6
116	63.3	24.408	20	52.74	39.49	0.3588	0.5046	10.99		116	75
117	63.3	24.415	20	52.77	39.51	0.3593	0.5055	11.02		117	74.6
118	63.1	24.438	20	52.77	39.53	0.3581	0.5038	11		118	74.2
119	62.9	24.454	20	52.78	39.54	0.358	0.5039	11		119	73.6
120	63	24.45	20	52.82	39.56	0.3581	0.5044	11.05		120	73.4
121	62.6	24.5	20	52.83	39.6	0.3591	0.5055	11.02		121	73.2
122	62.6	24.497	20	52.87	39.62	0.3591	0.5059	11.08		122	73
123	62.7	24.481	20	52.87	39.61	0.3592	0.5058	11.1		123	72.4
124	62.4	24.519	20	52.9	39.65	0.3592	0.5061	11.1		124	72.2
125	62.5	24.506	20	52.92	39.65	0.3595	0.5067	11.15		125	72.5
126	62.4	24.517	20	52.88	39.64	0.3635	0.5122	11.08		126	71.7
127	62.1	24.56	20	52.87	39.66	0.3633	0.5119	11.03		127	71.3
128	62.2	24.543	20	52.88	39.65	0.3634	0.5119	11.05		128	71.1
129	62.2	24.539	20	52.91	39.67	0.3637	0.5126	11.1		129	70.9
130	62	24.574	20	52.86	39.66	0.3629	0.5115	11		130	70.5
131	62	24.568	20	52.88	39.67	0.3623	0.5104	11.04		131	70.5
132	61.9	24.58	20	52.89	39.68	0.3622	0.5105	11.04		132	70.1
133	62	24.565	20	52.9	39.68	0.3622	0.5104	11.07		133	70
134	61.9	24.575	20	52.91	39.69	0.3622	0.5109	11.08		134	69.7
135	61.8	24.588	20	52.91	39.7	0.3634	0.5123	11.05		135	69.4
136	61.9	24.579	20	52.95	39.71	0.3631	0.5123	11.12		136	69.1
137	61.7	24.611	20	52.94	39.73	0.3625	0.5111	11.08		137	69
138	61.5	24.63	20	52.95	39.75	0.3625	0.5113	11.08		138	68.7
139	61.4	24.637	20	52.97	39.76	0.3626	0.5115	11.1		139	68.5
140	61.5	24.634	20	52.98	39.76	0.3629	0.512	11.12		140	68
141	61.4	24.639	20	53.01	39.78	0.3624	0.5113	11.16		141	67.9
142	61.6	24.624	20	53.01	39.78	0.3625	0.5116	11.18		142	67.7
143	61.5	24.636	20	53.01	39.78	0.3619	0.5108	11.16		143	67.6
144	61.3	24.661	20	53.06	39.82	0.3621	0.5114	11.2		144	67.7
145	61.1	24.675	20	53.05	39.83	0.3628	0.5121	11.18		145	67
146	61	24.696	20	53.06	39.85	0.363	0.5126	11.18		146	67
147	60.9	24.712	20	53.06	39.86	0.3634	0.5133	11.17		147	66.8
148	60.9	24.71	20	53.07	39.86	0.3641	0.5141	11.17		148	66.8
149	60.8	24.72	20	53.09	39.88	0.3632	0.5132	11.2		149	66.2
150	60.8	24.717	20	53.11	39.89	0.3627	0.5124	11.23		150	66.1
151	60.7	24.73	20	53.16	39.92	0.3627	0.5127	11.29		151	65.9
152	60.9	24.71	20	53.15	39.9	0.3628	0.5127	11.29		152	66
153	60.4	24.767	20	53.15	39.94	0.3631	0.5132	11.24		153	65.5
154	60.4	24.771	20	53.17	39.95	0.3629	0.5132	11.26		154	65.3
155	60.4	24.765	20	53.17	39.95	0.3635	0.5139	11.27		155	65.1
156	60.3	24.776	20	53.21	39.98	0.3627	0.5129	11.32		156	65
157	60.3	24.785	20	53.2	39.98	0.3624	0.5124	11.29		157	64.9
158	60.2	24.795	20	53.22	40	0.3629	0.5135	11.32		158	64.6
159	60.1	24.809	20	53.21	40	0.3631	0.5136	11.29		159	64.8
160	60	24.816	20	53.24	40.02	0.3637	0.5145	11.33		160	64.4
161	60.2	24.802	20	53.26	40.02	0.3639	0.5149	11.37		161	64.3
162	60.1	24.81	20	53.25	40.02	0.364	0.5151	11.35		162	64.4
163	59.8	24.844	20	53.28	40.06	0.364	0.5152	11.36		163	63.8
164	59.9	24.839	20	53.29	40.06	0.3641	0.5153	11.38		164	64
165	59.8	24.842	20	53.31	40.07	0.364	0.5153	11.4		165	63.7
166	60.2	24.799	20	53.31	40.05	0.3642	0.5154	11.45		166	63.6
167	59.7	24.855	20	53.35	40.11	0.364	0.5156	11.46		167	63.5
168	59.8	24.853	20	53.33	40.09	0.3641	0.5155	11.42		168	63.3
169	59.7	24.856	20	53.35	40.11	0.3639	0.5155	11.45		169	63.3
170	59.6	24.874	20	53.34	40.11	0.3642	0.5156	11.43		170	63.3
171	59.7	24.865	20	53.34	40.1	0.3642	0.5158	11.43		171	63.1
172	59.7	24.856	20	53.38	40.12	0.3642	0.5159	11.49		172	62.9
173	59.7	24.865	20	53.35	40.11	0.3642	0.516	11.45		173	63
174	59.3	24.907	20	53.37	40.15	0.3642	0.5159	11.44		174	62.6
175	59.7	24.865	20	53.38	40.13	0.3643	0.5159	11.49		175	62.6
176	59.5	24.887	20	53.39	40.15	0.3642	0.516	11.48		176	62.7
177	59	24.948	20	53.38	40.18	0.3643	0.516	11.41		177	62.4
178	59.2	24.923	20	53.38	40.17	0.3642	0.5158	11.44		178	62.5
179	59.2	24.929	20	53.4	40.18	0.3638	0.5156	11.46		179	62.4
180	59.3	24.913	20	53.4	40.17	0.364	0.5159	11.48		180	62.1
181	59.2	24.922	20	53.42	40.19	0.3641	0.516	11.5		181	62.2
182	59.1	24.938	20	53.42	40.2	0.3639	0.5158	11.48		182	62.2
183	59.2	24.926	20	53.41	40.18	0.364	0.516	11.49		183	62
184	59	24.954	20	53.43	40.21	0.364	0.5161	11.49		184	62
185	59	24.951	20	53.44	40.21	0.3641	0.5162	11.5		185	61.9
186	59	24.957	20	53.45	40.22	0.364	0.5161	11.51		186	62
187	58.9	24.962	20	53.45	40.23	0.3642	0.5164	11.51		187	61.9
188	59.2	24.923	20	53.49	40.22	0.3641	0.5163	11.59		188	61.8
189	59	24.948	20	53.49	40.24	0.3641	0.5163	11.58		189	61.9
190	59	24.959	20	53.48	40.24	0.3643	0.5164	11.55		190	61.7
191	58.7	24.999	20	53.49	40.27	0.3642	0.5167	11.54		191	61.5
192	58.9	24.97	20	53.49	40.25	0.3642	0.5166	11.56		192	61.4
193	58.7	24.988	20	53.51	40.28	0.3643	0.5167	11.58		193	61.5
194	58.8	24.984	20	53.53	40.28	0.3643	0.5167	11.6		194	61.4
195	58.6	25.006	20	53.52	40.29	0.3644	0.5168	11.57		195	61.6
196	58.7	24.996	20	53.55	40.3	0.3644	0.5171	11.62		196	61.5
197	58.6	25.007	20	53.53	40.3	0.3644	0.5171	11.59		197	61.3
198	58.6	25.003	20	53.55	40.31	0.3644	0.517	11.62		198	61.1
199	58.5	25.016	20	53.56	40.32	0.3643	0.5169	11.62		199	61
200	58.5	25.014	20	53.57	40.32	0.3644	0.5171	11.63		200	60.9
201	58.4	25.029	20	53.57	40.34	0.3645	0.5174	11.63		201	60.9
202	58.4	25.029	20	53.58	40.34	0.3645	0.5174	11.64		202	60.8
203	58.4	25.027	20	53.58	40.34	0.3644	0.5176	11.65		203	60.8
204	58.5	25.018	20	53.6	40.34	0.3643	0.5174	11.68		204	60.7
205	58.3	25.045	20	53.59	40.36	0.3644	0.5175	11.64		205	60.9
206	58.4	25.037	20	53.61	40.36	0.3644	0.5177	11.68		206	60.4
207	58.4	25.038	20	53.6	40.36	0.3645	0.5177	11.67		207	60.4
208	58.1	25.071	20	53.62	40.39	0.3644	0.5174	11.66		208	60.4
209	58.1	25.069	20	53.62	40.39	0.3644	0.5177	11.67		209	60.3
210	58.1	25.078	20	53.63	40.39	0.3645	0.5177	11.66		210	60.3
211	58.1	25.071	20	53.63	40.39	0.3645	0.5178	11.67		211	60.2
212	58.2	25.056	20	53.64	40.39	0.3645	0.5178	11.7		212	60.1
213	58	25.088	20	53.65	40.41	0.3646	0.5179	11.68		213	60
214	58	25.087	20	53.65	40.41	0.3646	0.5179	11.68		214	60.2
215	57.9	25.096	20	53.68	40.43	0.3647	0.5182	11.73		215	60.1
216	57.9	25.097	20	53.66	40.43	0.3646	0.5182	11.7		216	59.8
217	58.2	25.064	20	53.69	40.42	0.3646	0.5179	11.77		217	59.9
218	58	25.089	20	53.69	40.44	0.3647	0.5184	11.75		218	59.8
219	57.7	25.133	20	53.66	40.45	0.3646	0.5183	11.67		219	60.2
220	57.7	25.126	20	53.69	40.46	0.3645	0.518	11.72		220	59.7
221	58	25.09	20	53.71	40.45	0.3647	0.5182	11.77		221	59.8
222	57.9	25.098	20	53.7	40.45	0.3646	0.5183	11.76		222	59.7
223	57.7	25.124	20	53.7	40.46	0.3648	0.5184	11.73		223	59.6
224	57.8	25.114	20	53.7	40.46	0.3647	0.5185	11.74		224	59.7
225	57.7	25.126	20	53.72	40.47	0.3646	0.5183	11.75		225	59.7
226	57.7	25.13	20	53.72	40.48	0.3648	0.5184	11.76		226	59.7
227	57.8	25.115	20	53.73	40.47	0.3648	0.5185	11.79		227	59.3
228	57.7	25.133	20	53.72	40.48	0.3647	0.5185	11.75		228	59.7
229	57.8	25.114	20	53.75	40.49	0.3647	0.5185	11.82		229	59.5
230	57.6	25.14	20	53.73	40.49	0.3647	0.5186	11.77		230	59
231	57.5	25.16	20	53.74	40.51	0.3646	0.5186	11.76		231	59.2
232	57.6	25.139	20	53.75	40.5	0.3647	0.5188	11.79		232	59.2
233	57.6	25.147	20	53.75	40.51	0.3648	0.5187	11.79		233	59.3
234	57.3	25.187	20	53.76	40.54	0.3649	0.5189	11.77		234	59.2
235	57.7	25.122	20	53.76	40.49	0.3648	0.5189	11.83		235	59.1
236	57.3	25.191	20	53.77	40.54	0.3648	0.519	11.77		236	59.2
237	57.5	25.157	20	53.76	40.52	0.3649	0.519	11.79		237	59
238	57.4	25.176	20	53.77	40.53	0.3648	0.519	11.79		238	59
239	57.5	25.16	20	53.8	40.54	0.3649	0.5191	11.85		239	59
240	57.4	25.177	20	53.79	40.55	0.365	0.5191	11.83		240	58.9
241	57.3	25.187	20	53.8	40.56	0.3648	0.5192	11.83		241	59.2
242	57.2	25.192	20	53.79	40.56	0.3649	0.5193	11.81		242	59
243	57.4	25.177	20	53.81	40.56	0.3649	0.5193	11.86		243	59
244	56.9	25.239	20	53.79	40.59	0.3649	0.5192	11.77		244	58.7
245	57.3	25.177	20	53.81	40.55	0.3648	0.5193	11.85		245	58.9
246	57	25.233	20	53.83	40.6	0.365	0.5194	11.84		246	58.7
247	57.2	25.191	20	53.84	40.58	0.3649	0.5193	11.89		247	58.8
248	57.2	25.197	20	53.86	40.6	0.3649	0.5195	11.91		248	58.6
249	57.2	25.204	20	53.85	40.59	0.3649	0.5195	11.89		249	58.7
250	57	25.227	20	53.85	40.61	0.365	0.5196	11.87		250	58.6
251	57.1	25.205	20	53.87	40.61	0.3651	0.5198	11.92		251	58.6
252	57	25.227	20	53.86	40.61	0.3651	0.5198	11.88		252	58.5
253	56.9	25.239	20	53.9	40.64	0.3653	0.52	11.93		253	58.5
254	56.9	25.245	20	53.87	40.63	0.3651	0.5197	11.89		254	58.4
255	56.9	25.238	20	53.89	40.64	0.3651	0.5201	11.93		255	58.4
256	56.8	25.253	20	53.89	40.65	0.3652	0.5203	11.91		256	58.4
257	56.9	25.245	20	53.89	40.64	0.3653	0.5203	11.91		257	58.5
258	56.5	25.293	20	53.92	40.69	0.3653	0.5204	11.91		258	58.3
259	56.7	25.267	20	53.91	40.67	0.3652	0.5203	11.92		259	58.4
260	56.5	25.294	20	53.91	40.69	0.3653	0.5203	11.9		260	58.4
261	56.7	25.264	20	53.93	40.67	0.3651	0.5204	11.95		261	58.1
262	56.4	25.307	20	53.93	40.7	0.3653	0.5204	11.91		262	58.1
263	56.6	25.278	20	53.96	40.7	0.3653	0.5206	11.99		263	58.1
264	56.8	25.248	20	53.94	40.67	0.3653	0.5205	11.99		264	58.1
265	56.6	25.288	20	53.96	40.71	0.3651	0.5205	11.99		265	58.2
266	56.6	25.289	20	53.96	40.71	0.3652	0.5204	11.98		266	58
267	56.5	25.296	20	53.96	40.71	0.3653	0.5206	11.97		267	58
268	56.4	25.317	20	53.98	40.74	0.3654	0.5209	11.98		268	57.9
269	56.5	25.301	20	53.98	40.73	0.3652	0.5207	12.01		269	57.9
270	56.5	25.295	20	54	40.73	0.3653	0.5206	12.04		270	58.2
271	56.2	25.333	20	53.97	40.74	0.3653	0.5207	11.96		271	58
272	56.3	25.322	20	53.98	40.74	0.3653	0.5208	11.99		272	57.7
273	56.2	25.335	20	54	40.76	0.3653	0.5209	11.99		273	57.7
274	56.4	25.314	20	54	40.74	0.3653	0.5209	12.02		274	58
275	56.2	25.346	20	54.02	40.78	0.3654	0.521	12.02		275	57.9
276	56.4	25.309	20	53.99	40.74	0.3653	0.5208	12.01		276	57.7
277	56.1	25.351	20	54	40.77	0.3653	0.5208	11.98		277	57.8
278	56.2	25.346	20	54.02	40.77	0.3654	0.521	12.02		278	57.7
279	56.5	25.298	20	54.01	40.74	0.3653	0.5209	12.06		279	57.7
280	56.1	25.349	20	54.01	40.77	0.3653	0.521	12		280	57.8
281	56.6	25.283	20	53.98	40.72	0.3654	0.5207	12.02		281	57.7
282	56.6	25.284	20	53.97	40.71	0.3653	0.5205	12.01		282	57.8
283	56.7	25.265	20	53.92	40.67	0.3653	0.5204	11.94		283	57.6
284	57.2	25.204	20	53.88	40.61	0.3649	0.5197	11.94		284	57.5
285	57.2	25.196	20	53.83	40.58	0.3647	0.519	11.86		285	57.6
286	57.6	25.142	20	53.75	40.5	0.3646	0.5183	11.79		286	57.6
287	57.9	25.096	20	53.68	40.43	0.3643	0.5176	11.72		287	57.3
288	58.8	24.977	20	53.6	40.32	0.364	0.5166	11.71		288	57.7
289	59.8	24.841	20	53.41	40.13	0.3631	0.5144	11.55		289	57.3
290	60.3	24.777	20	53.27	40.01	0.3627	0.5132	11.4		290	57.5
291	60.9	24.707	20	53.17	39.91	0.3624	0.5121	11.33		291	57.4
292	61.6	24.613	20	53.05	39.79	0.362	0.511	11.24		292	57.5
293	62	24.568	20	52.91	39.69	0.3616	0.5096	11.08		293	57.4
294	62.9	24.462	20	52.8	39.56	0.361	0.5081	11.02		294	57.3
295	63.5	24.388	20	52.69	39.45	0.3606	0.5068	10.92		295	57.2
296	64.2	24.304	20	52.57	39.33	0.3601	0.5057	10.84		296	57.4
297	65.2	24.193	20	52.44	39.19	0.3596	0.5043	10.75		297	56.9
298	65.5	24.156	20	52.31	39.1	0.3592	0.503	10.61		298	57.3
299	66.4	24.053	20	52.17	38.96	0.3585	0.5014	10.52		299	57
300	67.2	23.972	20	52.07	38.85	0.3581	0.5004	10.45		300	57.2
301	67.8	23.904	20	51.94	38.74	0.3576	0.4991	10.34		301	57.2
302	68.5	23.825	20	51.82	38.62	0.3572	0.4979	10.26		302	57.2
303	69.3	23.74	20	51.73	38.51	0.3568	0.4966	10.21		303	57
304	69.9	23.686	20	51.61	38.42	0.3562	0.4954	10.11		304	57.1
305	70.6	23.608	20	51.5	38.3	0.3559	0.4943	10.03		305	57
306	71.4	23.532	20	51.41	38.21	0.3554	0.493	9.98		306	56.9
307	71.9	23.486	20	51.27	38.1	0.355	0.492	9.85		307	56.9
308	72.3	23.449	20	51.18	38.03	0.3545	0.491	9.78		308	56.9
309	73	23.379	20	51.06	37.92	0.3539	0.4897	9.69		309	56.8
310	73.8	23.301	20	51	37.84	0.3535	0.4889	9.68		310	56.9
311	73.9	23.294	20	50.89	37.77	0.3532	0.4879	9.56		311	56.5
312	74.9	23.196	20	50.8	37.66	0.3529	0.4869	9.52		312	56.7
313	75.4	23.156	20	50.73	37.6	0.3526	0.4862	9.48		313	56.5
314	76.2	23.082	20	50.64	37.5	0.3521	0.4851	9.43		314	56.7
315	76.4	23.067	20	50.56	37.45	0.3518	0.4843	9.36		315	56.4
316	77.1	23.001	20	50.47	37.36	0.3514	0.4833	9.31		316	56.6
317	77.5	22.965	20	50.39	37.29	0.351	0.4826	9.24		317	56.8
318	78	22.923	20	50.33	37.23	0.3508	0.4818	9.21		318	56.6
319	78.2	22.909	20	50.23	37.16	0.3506	0.481	9.11		319	56.6
320	78.8	22.863	20	50.18	37.1	0.3503	0.4804	9.09		320	56.5
321	79.5	22.798	20	50.11	37.02	0.3499	0.4796	9.06		321	56.4
322	79.6	22.789	20	50.05	36.99	0.3497	0.479	9.01		322	56.5
323	80.2	22.743	20	49.98	36.92	0.3494	0.4785	8.97		323	56.5
324	80.6	22.712	20	49.91	36.86	0.3491	0.4776	8.91		324	56.2
325	81.3	22.651	20	49.87	36.8	0.3487	0.4769	8.91		325	56.3
326	81.4	22.648	20	49.81	36.76	0.3487	0.4764	8.85		326	56.2
327	82	22.599	20	49.78	36.71	0.3483	0.4758	8.86		327	56.4
328	81.8	22.611	20	49.69	36.68	0.3479	0.4752	8.76		328	56.2
329	82.5	22.557	20	49.64	36.61	0.3477	0.4746	8.75		329	56.4
330	83	22.518	20	49.61	36.57	0.3475	0.4741	8.74		330	56.1
331	83.2	22.506	20	49.56	36.53	0.3473	0.4736	8.7		331	56.2
332	83.9	22.452	20	49.51	36.47	0.3473	0.4734	8.69		332	56.5
333	83.9	22.453	20	49.45	36.44	0.3471	0.4728	8.63		333	56.1
334	84.3	22.423	20	49.42	36.4	0.3467	0.4722	8.62		334	56.6
335	84.3	22.42	20	49.37	36.38	0.3467	0.4719	8.57		335	56.6
336	84.8	22.382	20	49.34	36.33	0.3465	0.4714	8.56		336	56.7
337	85.5	22.335	20	49.32	36.29	0.3464	0.4712	8.58		337	57.2
338	85.2	22.354	20	49.24	36.26	0.3461	0.4706	8.49		338	57.2
339	85.7	22.315	20	49.22	36.22	0.3458	0.4702	8.5		339	57.6
340	86.1	22.286	20	49.18	36.19	0.3457	0.4697	8.48		340	57.9
341	86.4	22.266	20	49.14	36.15	0.3455	0.4694	8.45		341	58.8
342	86.5	22.26	20	49.12	36.14	0.3454	0.4691	8.44		342	59.8
343	86.7	22.242	20	49.07	36.1	0.3452	0.4686	8.4		343	60.3
344	87.4	22.192	20	49.05	36.05	0.345	0.4684	8.42		344	60.9
345	87	22.222	20	49.01	36.05	0.3449	0.4679	8.35		345	61.6
346	87.5	22.186	20	48.97	36	0.3447	0.4675	8.34		346	62
347	87.8	22.164	20	48.97	35.99	0.3446	0.4674	8.36		347	62.9
348	88.1	22.144	20	48.93	35.95	0.3445	0.4672	8.33		348	63.5
349	88.2	22.14	20	48.9	35.94	0.3452	0.4679	8.31		349	64.2
350	88.4	22.127	20	48.86	35.9	0.3441	0.4664	8.27		350	65.2
351	88.4	22.124	20	48.84	35.89	0.3441	0.4659	8.26		351	65.5
352	88.9	22.091	20	48.83	35.87	0.344	0.466	8.27		352	66.4
353	89.3	22.065	20	48.75	35.81	0.3442	0.466	8.22		353	67.2
354	89.5	22.05	20	48.71	35.77	0.344	0.4653	8.19		354	67.8
355	89.8	22.032	20	48.7	35.76	0.3438	0.4652	8.19		355	68.5
356	89.8	22.029	20	48.65	35.73	0.3437	0.4651	8.15		356	69.3
357	90	22.014	20	48.63	35.71	0.3438	0.465	8.14		357	69.9
358	90	22.016	20	48.63	35.7	0.3435	0.4647	8.13		358	70.6
359	90.9	21.957	20	48.58	35.64	0.3434	0.4641	8.12		359	71.4
360	90.2	22.004	20	48.57	35.67	0.3433	0.4642	8.09		360	71.9
361	90.6	21.977	20	48.55	35.64	0.3432	0.4639	8.09		361	72.3
362	90.7	21.968	20	48.53	35.62	0.343	0.4635	8.08		362	73
363	90.8	21.96	20	48.51	35.6	0.343	0.4633	8.06		363	73.8
364	91.2	21.937	20	48.48	35.57	0.3428	0.4631	8.05		364	73.9
365	91	21.95	20	48.47	35.58	0.3427	0.4627	8.04		365	74.9
366	91.3	21.931	20	48.45	35.55	0.3426	0.4628	8.03		366	75.4
367	91.4	21.923	20	48.43	35.54	0.3426	0.4626	8.02		367	76.2
368	91.7	21.902	20	48.43	35.52	0.3425	0.4624	8.03		368	76.4
369	91.9	21.887	20	48.41	35.5	0.3425	0.4621	8.02		369	77.1
370	92	21.881	20	48.4	35.49	0.3423	0.4618	8.01		370	77.5
371	91.7	21.903	20	48.36	35.48	0.3423	0.4619	7.96		371	78
372	92.2	21.872	20	48.35	35.46	0.3422	0.4617	7.98		372	78.2
373	92.4	21.856	20	48.34	35.44	0.3421	0.4615	7.98		373	78.8
374	92.3	21.861	20	48.31	35.43	0.342	0.4612	7.95		374	79.5
375	92.4	21.856	20	48.31	35.43	0.3419	0.4611	7.95		375	79.6
376	92.6	21.841	20	48.29	35.4	0.3418	0.4608	7.94		376	80.2
377	92.4	21.858	20	48.27	35.41	0.3416	0.4608	7.92		377	80.6
378	93	21.817	20	48.27	35.38	0.3417	0.4604	7.94		378	81.3
379	93.3	21.799	20	48.24	35.35	0.3416	0.4604	7.93		379	81.4
380	92.9	21.827	20	48.23	35.36	0.3415	0.4602	7.9		380	82
381	93.3	21.801	20	48.2	35.33	0.3415	0.4602	7.89		381	81.8
382	93.7	21.772	20	48.21	35.32	0.3414	0.4599	7.92		382	82.5
383	93.4	21.792	20	48.17	35.31	0.3413	0.4599	7.87		383	83
384	93.7	21.777	20	48.19	35.31	0.3413	0.4598	7.89		384	83.2
385	93.3	21.798	20	48.16	35.31	0.3412	0.4595	7.86		385	83.9
386	93.9	21.763	20	48.14	35.27	0.3412	0.4596	7.86		386	83.9
387	93.1	21.813	20	48.14	35.31	0.3411	0.4593	7.83		387	84.3
388	93.9	21.761	20	48.12	35.26	0.341	0.4592	7.84		388	84.3
389	94.6	21.716	20	48.12	35.23	0.341	0.459	7.87		389	84.8
390	94.2	21.745	20	48.09	35.23	0.3407	0.4588	7.83		390	85.5
391	94.1	21.746	20	48.09	35.23	0.3407	0.4588	7.82		391	85.2
392	94.3	21.737	20	48.08	35.22	0.3408	0.4589	7.82		392	85.7
393	94.2	21.742	20	48.06	35.22	0.3407	0.4585	7.81		393	86.1
394	94.2	21.741	20	48.05	35.21	0.3407	0.4585	7.8		394	86.4
395	94.9	21.701	20	48.03	35.17	0.3406	0.4583	7.81		395	86.5
396	95.2	21.679	20	48.05	35.17	0.3407	0.4583	7.83		396	86.7
397	94.7	21.71	20	48.04	35.18	0.3406	0.4581	7.8		397	87.4
398	95	21.696	20	48.01	35.16	0.3406	0.458	7.79		398	87
399	94.8	21.706	20	48.01	35.17	0.3404	0.4579	7.79		399	87.5
400	95	21.695	20	47.99	35.15	0.3402	0.4576	7.77		400	87.8
401	95.2	21.68	20	47.99	35.14	0.3404	0.4577	7.78		401	88.1
402	95.2	21.681	20	47.98	35.13	0.3402	0.4575	7.77		402	88.2
403	95.4	21.669	20	47.95	35.11	0.3404	0.4575	7.75		403	88.4
404	95.1	21.687	20	47.98	35.14	0.3402	0.4573	7.77		404	88.4
405	95.4	21.671	20	47.94	35.1	0.3401	0.4571	7.74		405	88.9
406	95.4	21.667	20	47.93	35.1	0.34	0.4571	7.74		406	89.3
407	95.3	21.677	20	47.93	35.1	0.34	0.4571	7.73		407	89.5
408	95.2	21.68	20	47.9	35.08	0.3399	0.4569	7.7		408	89.8
409	95.8	21.645	20	47.91	35.07	0.3399	0.4567	7.74		409	89.8
410	96	21.632	20	47.9	35.06	0.3399	0.4567	7.73		410	90
411	95.7	21.649	20	47.9	35.07	0.3398	0.4563	7.72		411	90
412	96	21.63	20	47.88	35.04	0.3397	0.4564	7.72		412	90.9
413	96.2	21.62	20	47.89	35.04	0.3397	0.4564	7.73		413	90.2
414	95.9	21.635	20	47.87	35.04	0.3398	0.4564	7.7		414	90.6
415	96.2	21.618	20	47.85	35.02	0.3397	0.4562	7.7		415	90.7
416	96.3	21.614	20	47.86	35.02	0.3396	0.456	7.71		416	90.8
417	96.1	21.625	20	47.83	35.01	0.3395	0.4559	7.68		417	91.2
418	96.1	21.627	20	47.83	35.01	0.3395	0.456	7.67		418	91
419	96.5	21.6	20	47.82	34.99	0.3394	0.4558	7.68		419	91.3
420	96	21.629	20	47.81	35.01	0.3394	0.4557	7.66		420	91.4
421	96.9	21.577	20	47.81	34.97	0.3393	0.4556	7.69		421	91.7
422	96.7	21.588	20	47.8	34.97	0.3393	0.4556	7.68		422	91.9
423	96.8	21.584	20	47.8	34.97	0.3393	0.4555	7.67		423	92
424	96.6	21.596	20	47.77	34.96	0.3393	0.4554	7.64		424	91.7
425	96.8	21.583	20	47.79	34.96	0.3392	0.4552	7.67		425	92.2
426	97.2	21.562	20	47.76	34.93	0.3392	0.4551	7.66		426	92.4
427	97.3	21.553	20	47.78	34.94	0.3389	0.455	7.68		427	92.3
428	96.9	21.576	20	47.76	34.94	0.3391	0.4551	7.64		428	92.4
429	96.7	21.59	20	47.74	34.94	0.339	0.4549	7.63		429	92.6
430	97.4	21.547	20	47.76	34.92	0.3389	0.4548	7.66		430	92.4
431	96.9	21.579	20	47.71	34.92	0.339	0.455	7.61		431	93
432	97.2	21.56	20	47.76	34.93	0.3388	0.4553	7.66		432	93.3
433	97.3	21.557	20	47.72	34.91	0.3389	0.4552	7.63		433	92.9
434	97.2	21.561	20	47.71	34.91	0.3388	0.4549	7.62		434	93.3
435	97.5	21.544	20	47.72	34.9	0.3388	0.4549	7.63		435	93.7
436	97.4	21.549	20	47.71	34.9	0.3388	0.4548	7.63		436	93.4
437	97.4	21.549	20	47.72	34.9	0.3387	0.4546	7.63		437	93.7
438	97.8	21.525	20	47.7	34.87	0.3387	0.4544	7.63		438	93.3
439	97.3	21.557	20	47.68	34.88	0.3386	0.4541	7.59		439	93.9
440	97.4	21.551	20	47.66	34.87	0.3385	0.4541	7.58		440	93.1
441	98.3	21.497	20	47.66	34.84	0.3386	0.454	7.61		441	93.9
442	97.8	21.522	20	47.66	34.85	0.3385	0.4541	7.6		442	94.6
443	97.8	21.523	20	47.66	34.85	0.3385	0.4539	7.59		443	94.2
444	97.9	21.517	20	47.67	34.86	0.3384	0.4538	7.61		444	94.1
445	98.1	21.51	20	47.66	34.84	0.3384	0.4537	7.6		445	94.3
446	97.7	21.532	20	47.64	34.85	0.3384	0.4538	7.58		446	94.2
447	98	21.511	20	47.65	34.84	0.3383	0.4535	7.59		447	94.2
448	97.8	21.525	20	47.63	34.84	0.3382	0.4534	7.57		448	94.9
449	98.2	21.503	20	47.62	34.82	0.3381	0.4534	7.58		449	95.2
450	98.3	21.497	20	47.6	34.8	0.3379	0.453	7.56		450	94.7
451	98.3	21.497	20	47.61	34.81	0.3378	0.4529	7.57		451	95
452	98.3	21.495	20	47.6	34.8	0.3378	0.453	7.57		452	94.8
453	98.6	21.478	20	47.59	34.78	0.3378	0.4529	7.56		453	95
454	98.4	21.491	20	47.59	34.79	0.3377	0.4527	7.56		454	95.2
455	97.9	21.521	20	47.56	34.8	0.3376	0.4525	7.52		455	95.2
456	98.4	21.491	20	47.58	34.79	0.3376	0.4525	7.55		456	95.4
457	98.5	21.485	20	47.57	34.78	0.3375	0.4525	7.55		457	95.1
458	98.9	21.458	20	47.58	34.76	0.3375	0.4523	7.57		458	95.4
459	98.2	21.499	20	47.56	34.78	0.3376	0.4524	7.53		459	95.4
460	98.8	21.468	20	47.55	34.75	0.3375	0.4522	7.54		460	95.3
461	99.3	21.438	20	47.57	34.75	0.3374	0.4522	7.57		461	95.2
462	98.9	21.459	20	47.54	34.74	0.3374	0.4522	7.54		462	95.8
463	98.6	21.479	20	47.53	34.75	0.3373	0.4522	7.52		463	96
464	98.8	21.467	20	47.54	34.75	0.3374	0.4522	7.53		464	95.7
465	99.3	21.437	20	47.52	34.72	0.3374	0.4522	7.53		465	96
466	99.2	21.446	20	47.55	34.74	0.3374	0.4521	7.56		466	96.2
467	98.6	21.479	20	47.51	34.74	0.3373	0.452	7.5		467	95.9
468	99	21.453	20	47.52	34.73	0.3374	0.4517	7.52		468	96.2
469	99.2	21.442	20	47.54	34.73	0.3361	0.4504	7.55		469	96.3
470	98.6	21.479	20	47.63	34.81	0.3317	0.4449	7.6		470	96.1
471	98.4	21.489	20	47.63	34.81	0.3317	0.4449	7.59		471	96.1
472	99.3	21.438	20	47.63	34.78	0.3316	0.4448	7.62		472	96.5
473	99.1	21.45	20	47.62	34.78	0.3324	0.4457	7.6		473	96
474	99	21.453	20	47.63	34.79	0.3335	0.4473	7.61		474	96.9
475	99.4	21.434	20	47.62	34.77	0.3335	0.4472	7.61		475	96.7
476	99.1	21.451	20	47.61	34.78	0.3337	0.4474	7.6		476	96.8
477	99.2	21.442	20	47.6	34.77	0.3336	0.4471	7.6		477	96.6
478	98.8	21.467	20	47.59	34.78	0.3357	0.4499	7.57		478	96.8
479	99.5	21.424	20	47.58	34.74	0.3361	0.4503	7.59		479	97.2
480	99	21.454	20	47.57	34.76	0.3361	0.4504	7.57		480	97.3
										481	96.9
										482	96.7
										483	97.4
										484	96.9
										485	97.2
										486	97.3
										487	97.2
										488	97.5
										489	97.4
										490	97.4
										491	97.8
										492	97.3
										493	97.4
										494	98.3
										495	97.8
										496	97.8
										497	97.9
										498	98.1
										499	97.7
										500	98
										501	97.8
										502	98.2
										503	98.3
										504	98.3
										505	98.3
										506	98.6
										507	98.4
										508	97.9
										509	98.4
										510	98.5
										511	98.9
										512	98.2
										513	98.8
										514	99.3
										515	98.9
										516	98.6
										517	98.8
										518	99.3
										519	99.2
										520	98.6
										521	99
										522	99.2
										523	98.6
										524	98.4
										525	99.3
										526	99.1
										527	99

## Sheet: O2-high-2.4-fwd
Colibri Photonics GmbH Ibidi-OPAL	Dezimaltrennzeichen: Komma				spot:	B	gasflow:	high	pumppress:	50 kPa
2016-02-17	1899-12-31 18:21:37				frequency:	2.4 Hz	dir:	fwd	pumpvac:	-50 kPa
tau100 = 21,229 Âµs @ 20 Â°C	tau0 = 59,000 Âµs @ 20 Â°C	f = 0,75			pumpgas:	O2
T-Korr von tau100 = -0,0272 Âµs / Â°C	T-Korr von tau0 = -0,0203 Âµs / Â°C
Freq 1 = 11,993 kHz	Freq 2 = 6,323 kHz
Zeit / s	O2-Gehalt / %-Luft	tau / Âµs	T / Â°C	Phase1 / Â° @ 11,993 kHz	Phase2 / Â° @ 6,323 kHz	Amplitude1 / V p-p	Amplitude2 / V p-p	Signal : Untergrund
1	100.3	21.214	20	47.11	34.35	0.338	0.4509	7.33
2	100.2	21.219	20	47.09	34.34	0.3379	0.4508	7.31
3	100.3	21.212	20	47.09	34.34	0.3381	0.4508	7.32
4	100.6	21.193	20	47.09	34.32	0.338	0.4508	7.33
5	100.3	21.212	20	47.08	34.33	0.338	0.4509	7.31
6	100.7	21.192	20	47.12	34.34	0.338	0.4509	7.35
7	100.5	21.2	20	47.09	34.33	0.3383	0.451	7.33
8	100.5	21.201	20	47.1	34.33	0.338	0.4507	7.33
9	100.5	21.202	20	47.09	34.33	0.3381	0.451	7.32
10	100.1	21.225	20	47.09	34.34	0.3382	0.451	7.31
11	100.3	21.21	20	47.08	34.33	0.34	0.4532	7.31
12	101	21.176	20	47.08	34.31	0.3379	0.4507	7.33
13	100.7	21.193	20	47.08	34.32	0.3378	0.4505	7.32
14	100.8	21.188	20	47.07	34.31	0.3386	0.4513	7.31
15	101.4	21.151	20	47.03	34.26	0.3383	0.4509	7.31
16	100.8	21.185	20	47.03	34.28	0.337	0.4493	7.29
17	101.1	21.169	20	47.02	34.27	0.3369	0.4492	7.29
18	100.8	21.188	20	47.04	34.29	0.3377	0.4503	7.29
19	100.8	21.185	20	47.04	34.29	0.3378	0.4504	7.3
20	100.7	21.192	20	47.06	34.3	0.3378	0.4506	7.3
21	99.8	21.238	20	47.08	34.35	0.3368	0.4494	7.3
22	99.7	21.243	20	47.1	34.36	0.3369	0.4496	7.31
23	99.6	21.249	20	47.17	34.41	0.3369	0.45	7.36
24	98.9	21.288	20	47.2	34.44	0.3384	0.452	7.36
25	98.5	21.315	20	47.29	34.51	0.3383	0.4522	7.41
26	97.9	21.347	20	47.33	34.56	0.3389	0.4531	7.43
27	97.2	21.388	20	47.39	34.62	0.3395	0.4541	7.46
28	96.7	21.418	20	47.49	34.69	0.3394	0.4544	7.52
29	95.7	21.477	20	47.55	34.76	0.3398	0.4553	7.53
30	94.7	21.537	20	47.67	34.87	0.3405	0.4566	7.6
31	94.3	21.558	20	47.75	34.93	0.3407	0.4574	7.65
32	92.7	21.661	20	47.85	35.05	0.3416	0.459	7.67
33	92.3	21.686	20	47.96	35.12	0.3416	0.4594	7.75
34	91.3	21.746	20	48.04	35.21	0.3422	0.4608	7.79
35	90.6	21.796	20	48.16	35.31	0.3434	0.4629	7.86
36	90	21.833	20	48.26	35.38	0.3436	0.4634	7.92
37	89.1	21.892	20	48.35	35.48	0.3424	0.4625	7.97
38	87.9	21.973	20	48.45	35.58	0.3425	0.4632	8
39	87.7	21.989	20	48.57	35.65	0.343	0.4642	8.1
40	86.2	22.095	20	48.74	35.82	0.3462	0.4692	8.18
41	85.1	22.176	20	48.89	35.95	0.3454	0.4686	8.27
42	84.5	22.214	20	48.96	36.02	0.3463	0.4699	8.32
43	83.7	22.274	20	49.08	36.12	0.3466	0.4707	8.39
44	83	22.327	20	49.17	36.21	0.3476	0.4725	8.44
45	82.2	22.391	20	49.25	36.29	0.3469	0.4723	8.47
46	81.6	22.434	20	49.37	36.39	0.3473	0.4733	8.56
47	81	22.48	20	49.45	36.46	0.3474	0.4735	8.61
48	80.5	22.52	20	49.55	36.54	0.3477	0.4742	8.68
49	79.8	22.578	20	49.63	36.62	0.349	0.4762	8.73
50	79.2	22.629	20	49.71	36.7	0.3498	0.4778	8.77
51	78.3	22.701	20	49.82	36.81	0.3497	0.4782	8.83
52	78.1	22.722	20	49.89	36.85	0.3497	0.4784	8.89
53	77.3	22.789	20	49.99	36.95	0.3497	0.4789	8.94
54	76.7	22.835	20	50.06	37.02	0.3506	0.4804	8.99
55	76.4	22.863	20	50.13	37.08	0.3518	0.4823	9.04
56	76	22.9	20	50.23	37.16	0.3515	0.4825	9.12
57	75.5	22.944	20	50.3	37.22	0.3511	0.4821	9.16
58	74.7	23.01	20	50.38	37.31	0.3512	0.4826	9.2
59	74.3	23.053	20	50.44	37.37	0.3512	0.4829	9.23
60	73.8	23.097	20	50.51	37.44	0.3517	0.4842	9.28
61	73.3	23.143	20	50.58	37.5	0.3524	0.4853	9.32
62	72.9	23.178	20	50.64	37.56	0.3532	0.4867	9.36
63	72.8	23.191	20	50.72	37.62	0.3532	0.4872	9.45
64	72.2	23.245	20	50.76	37.67	0.3535	0.4877	9.45
65	71.8	23.283	20	50.87	37.75	0.3529	0.4872	9.54
66	71.6	23.3	20	50.91	37.78	0.353	0.4877	9.57
67	71.1	23.346	20	50.95	37.84	0.3534	0.4886	9.59
68	70.8	23.379	20	51.04	37.91	0.3541	0.4898	9.66
69	70.2	23.435	20	51.07	37.96	0.3547	0.4908	9.66
70	70.4	23.421	20	51.14	37.99	0.3546	0.4911	9.75
71	70.1	23.449	20	51.21	38.04	0.3546	0.4914	9.81
72	69.7	23.485	20	51.24	38.09	0.3546	0.4917	9.82
73	69.3	23.531	20	51.3	38.15	0.3546	0.4917	9.85
74	68.9	23.569	20	51.32	38.18	0.3553	0.493	9.85
75	68.6	23.606	20	51.41	38.25	0.3556	0.4938	9.92
76	68.6	23.606	20	51.45	38.28	0.3558	0.494	9.98
77	68.1	23.653	20	51.48	38.32	0.3564	0.4953	9.97
78	67.8	23.684	20	51.54	38.38	0.3567	0.4957	10.02
79	67.7	23.699	20	51.58	38.41	0.3568	0.4962	10.06
80	67.4	23.726	20	51.62	38.45	0.3572	0.4969	10.09
81	67.1	23.763	20	51.65	38.48	0.3576	0.4977	10.09
82	67	23.767	20	51.7	38.52	0.3576	0.498	10.15
83	66.9	23.783	20	51.72	38.54	0.3575	0.4978	10.16
84	66.4	23.835	20	51.76	38.59	0.3578	0.4983	10.17
85	66.1	23.87	20	51.79	38.63	0.3579	0.4988	10.19
86	66.3	23.847	20	51.82	38.63	0.3572	0.4981	10.24
87	66.1	23.866	20	51.87	38.67	0.3572	0.498	10.28
88	65.9	23.886	20	51.89	38.7	0.3571	0.498	10.29
89	65.3	23.953	20	51.92	38.76	0.3574	0.4989	10.28
90	65.4	23.948	20	51.96	38.77	0.3581	0.4997	10.33
91	65.5	23.938	20	51.98	38.78	0.3584	0.5004	10.37
92	65.3	23.959	20	52.03	38.82	0.3582	0.5004	10.41
93	64.9	24.001	20	52.04	38.85	0.3581	0.5002	10.39
94	65.1	23.98	20	52.1	38.87	0.358	0.5005	10.49
95	64.8	24.013	20	52.09	38.89	0.3583	0.5008	10.45
96	64.4	24.053	20	52.11	38.92	0.3583	0.5011	10.44
97	64.3	24.066	20	52.17	38.96	0.3588	0.502	10.5
98	64.1	24.096	20	52.16	38.98	0.3591	0.5023	10.47
99	64.3	24.071	20	52.23	39	0.3593	0.5028	10.58
100	63.7	24.137	20	52.25	39.05	0.3595	0.5033	10.55
101	63.6	24.15	20	52.29	39.08	0.3597	0.5038	10.59
102	63.6	24.154	20	52.28	39.08	0.3597	0.5038	10.58
103	63.5	24.166	20	52.34	39.12	0.3595	0.5036	10.65
104	63.6	24.15	20	52.35	39.11	0.3596	0.504	10.67
105	63.1	24.205	20	52.37	39.16	0.3596	0.5041	10.65
106	63.3	24.19	20	52.39	39.16	0.3598	0.5045	10.69
107	62.9	24.234	20	52.39	39.19	0.3599	0.5045	10.66
108	62.6	24.262	20	52.42	39.22	0.3598	0.5046	10.67
109	62.8	24.239	20	52.44	39.22	0.3602	0.505	10.72
110	62.5	24.283	20	52.47	39.26	0.36	0.5051	10.72
111	62.7	24.251	20	52.49	39.25	0.36	0.505	10.77
112	62.5	24.281	20	52.48	39.27	0.36	0.5051	10.74
113	62.2	24.315	20	52.53	39.32	0.3599	0.5053	10.77
114	62.3	24.306	20	52.53	39.31	0.3601	0.5056	10.78
115	62.1	24.322	20	52.56	39.34	0.3601	0.5057	10.81
116	62.1	24.331	20	52.57	39.35	0.3602	0.5061	10.81
117	62	24.335	20	52.58	39.36	0.3602	0.506	10.82
118	61.8	24.361	20	52.6	39.39	0.3602	0.5061	10.83
119	61.7	24.375	20	52.6	39.39	0.3603	0.5064	10.82
120	61.9	24.355	20	52.65	39.41	0.3604	0.5068	10.91
121	61.6	24.394	20	52.66	39.44	0.3605	0.5069	10.88
122	61.5	24.4	20	52.67	39.45	0.3607	0.5069	10.9
123	61.4	24.416	20	52.69	39.47	0.3605	0.507	10.91
124	61.5	24.396	20	52.69	39.46	0.3607	0.5072	10.92
125	61.3	24.427	20	52.72	39.49	0.3607	0.5076	10.94
126	61.2	24.441	20	52.74	39.51	0.3608	0.5075	10.95
127	60.9	24.47	20	52.73	39.53	0.3609	0.5078	10.92
128	61	24.462	20	52.77	39.54	0.3607	0.5076	10.97
129	60.9	24.472	20	52.77	39.55	0.3608	0.508	10.96
130	60.8	24.488	20	52.8	39.57	0.361	0.5082	10.99
131	60.8	24.49	20	52.82	39.58	0.361	0.5084	11.01
132	60.6	24.507	20	52.84	39.61	0.3609	0.5083	11.03
133	60.7	24.503	20	52.84	39.61	0.361	0.5084	11.04
134	60.6	24.509	20	52.86	39.62	0.3611	0.5087	11.06
135	60.4	24.535	20	52.88	39.64	0.3612	0.5088	11.06
136	60.3	24.547	20	52.9	39.66	0.3612	0.5089	11.08
137	60.4	24.542	20	52.89	39.66	0.3611	0.5089	11.08
138	60.3	24.551	20	52.91	39.67	0.3612	0.5092	11.09
139	60.1	24.569	20	52.93	39.7	0.3613	0.5094	11.11
140	60.2	24.566	20	52.96	39.71	0.3613	0.5096	11.15
141	60.1	24.576	20	52.96	39.72	0.3613	0.5095	11.14
142	60	24.589	20	53	39.74	0.3615	0.51	11.18
143	59.9	24.602	20	52.98	39.74	0.3614	0.5097	11.15
144	59.7	24.621	20	52.99	39.76	0.3614	0.5099	11.15
145	59.5	24.647	20	53.01	39.79	0.3616	0.5101	11.15
146	59.7	24.632	20	53.02	39.79	0.3616	0.5103	11.18
147	59.4	24.661	20	53.03	39.81	0.3617	0.5105	11.16
148	59.5	24.655	20	53.03	39.8	0.3618	0.5106	11.17
149	59.5	24.647	20	53.07	39.82	0.3617	0.5106	11.23
150	59.3	24.682	20	53.06	39.84	0.3618	0.5108	11.19
151	59.5	24.651	20	53.1	39.84	0.3617	0.5108	11.28
152	59.3	24.682	20	53.1	39.86	0.3618	0.511	11.25
153	59.3	24.679	20	53.11	39.86	0.362	0.5112	11.26
154	59.1	24.707	20	53.13	39.89	0.3619	0.5114	11.27
155	59.3	24.683	20	53.14	39.88	0.3621	0.5114	11.31
156	58.9	24.731	20	53.15	39.92	0.3621	0.5117	11.27
157	58.9	24.732	20	53.16	39.92	0.3621	0.5119	11.29
158	58.9	24.733	20	53.16	39.92	0.3621	0.5116	11.28
159	58.9	24.726	20	53.19	39.94	0.362	0.5118	11.34
160	58.7	24.755	20	53.2	39.96	0.3623	0.5119	11.33
161	58.6	24.773	20	53.21	39.98	0.3621	0.5121	11.33
162	58.5	24.777	20	53.23	39.99	0.3623	0.5124	11.34
163	58.5	24.778	20	53.21	39.98	0.3622	0.5121	11.32
164	58.4	24.8	20	53.24	40.01	0.3622	0.5123	11.34
165	58.3	24.808	20	53.26	40.02	0.3623	0.5126	11.36
166	58.4	24.792	20	53.27	40.02	0.3624	0.5126	11.4
167	58.4	24.792	20	53.27	40.02	0.3624	0.5129	11.39
168	58.3	24.806	20	53.3	40.04	0.3626	0.513	11.42
169	58.2	24.826	20	53.29	40.05	0.3626	0.5131	11.39
170	58.2	24.823	20	53.31	40.07	0.3626	0.5131	11.43
171	58.3	24.811	20	53.34	40.07	0.3626	0.5134	11.47
172	57.9	24.857	20	53.32	40.09	0.3626	0.5132	11.41
173	58.2	24.817	20	53.34	40.08	0.3624	0.5132	11.48
174	58.1	24.836	20	53.35	40.09	0.3626	0.5134	11.47
175	57.9	24.866	20	53.38	40.13	0.3627	0.5136	11.48
176	57.9	24.866	20	53.37	40.12	0.3627	0.5137	11.47
177	57.7	24.884	20	53.38	40.14	0.3625	0.5137	11.47
178	58	24.854	20	53.4	40.13	0.3626	0.5136	11.53
179	57.7	24.888	20	53.39	40.15	0.3627	0.5139	11.48
180	57.9	24.87	20	53.42	40.15	0.3628	0.5141	11.55
181	57.7	24.887	20	53.41	40.16	0.3628	0.514	11.52
182	57.6	24.901	20	53.42	40.17	0.3628	0.5141	11.52
183	57.7	24.89	20	53.43	40.17	0.3628	0.5142	11.54
184	57.5	24.922	20	53.44	40.19	0.3628	0.5143	11.52
185	57.4	24.936	20	53.46	40.22	0.3628	0.5144	11.55
186	57.5	24.923	20	53.46	40.21	0.363	0.5147	11.56
187	57.4	24.935	20	53.48	40.22	0.3629	0.5146	11.57
188	57.4	24.932	20	53.48	40.22	0.3628	0.5146	11.57
189	57.2	24.956	20	53.48	40.24	0.363	0.5146	11.56
190	57.3	24.946	20	53.51	40.25	0.3631	0.5148	11.61
191	57.2	24.964	20	53.5	40.25	0.3629	0.5148	11.58
192	57	24.985	20	53.53	40.28	0.3631	0.5149	11.6
193	57.1	24.969	20	53.52	40.27	0.3631	0.5148	11.6
194	57.1	24.966	20	53.54	40.28	0.363	0.515	11.64
195	57	24.991	20	53.53	40.29	0.3631	0.5151	11.6
196	57	24.988	20	53.54	40.29	0.3632	0.5153	11.62
197	57	24.993	20	53.57	40.31	0.3632	0.5154	11.66
198	57.2	24.96	20	53.56	40.28	0.3632	0.5154	11.67
199	56.6	25.038	20	53.56	40.34	0.3632	0.5154	11.61
200	56.9	25.006	20	53.58	40.32	0.3632	0.5154	11.66
201	56.8	25.018	20	53.58	40.33	0.3632	0.5155	11.66
202	56.9	24.993	20	53.6	40.33	0.3634	0.5157	11.71
203	56.9	25.003	20	53.6	40.33	0.3633	0.5158	11.7
204	56.7	25.031	20	53.63	40.37	0.3633	0.5159	11.72
205	56.7	25.034	20	53.6	40.36	0.3635	0.516	11.67
206	56.7	25.03	20	53.63	40.37	0.3634	0.516	11.72
207	56.5	25.057	20	53.62	40.38	0.3634	0.516	11.68
208	56.6	25.047	20	53.63	40.38	0.3635	0.516	11.7
209	56.4	25.074	20	53.65	40.41	0.3634	0.5162	11.71
210	56.7	25.025	20	53.66	40.38	0.3635	0.5162	11.76
211	56.6	25.042	20	53.68	40.4	0.3635	0.5163	11.78
212	56.5	25.052	20	53.68	40.41	0.3636	0.5166	11.77
213	56.3	25.081	20	53.68	40.42	0.3636	0.5164	11.74
214	56.2	25.101	20	53.7	40.45	0.3634	0.5165	11.75
215	56.2	25.097	20	53.68	40.44	0.3634	0.5166	11.73
216	56.2	25.099	20	53.7	40.45	0.3635	0.5166	11.76
217	56.3	25.081	20	53.71	40.44	0.3635	0.5167	11.79
218	56	25.123	20	53.71	40.47	0.3636	0.5166	11.75
219	56.1	25.114	20	53.72	40.47	0.3636	0.5167	11.77
220	56.1	25.105	20	53.72	40.46	0.3635	0.5168	11.77
221	56	25.132	20	53.76	40.5	0.3637	0.5172	11.82
222	56.1	25.112	20	53.75	40.48	0.3637	0.5171	11.82
223	56	25.121	20	53.77	40.5	0.3637	0.5172	11.84
224	56.1	25.114	20	53.77	40.5	0.3637	0.5172	11.85
225	55.8	25.15	20	53.77	40.52	0.3638	0.5173	11.81
226	55.9	25.144	20	53.79	40.52	0.3639	0.5175	11.85
227	55.9	25.142	20	53.77	40.52	0.3638	0.5173	11.83
228	55.7	25.166	20	53.8	40.54	0.3639	0.5176	11.84
229	55.8	25.149	20	53.81	40.54	0.3636	0.5174	11.87
230	55.7	25.172	20	53.81	40.55	0.3639	0.5175	11.86
231	55.7	25.167	20	53.83	40.56	0.3638	0.5178	11.89
232	55.5	25.203	20	53.83	40.59	0.3639	0.5176	11.86
233	55.6	25.18	20	53.86	40.58	0.3637	0.5177	11.92
234	55.5	25.195	20	53.85	40.59	0.364	0.5179	11.89
235	55.5	25.193	20	53.87	40.6	0.3639	0.5182	11.93
236	55.5	25.201	20	53.87	40.6	0.364	0.5179	11.92
237	55.4	25.217	20	53.89	40.62	0.364	0.5182	11.94
238	55.4	25.214	20	53.86	40.61	0.364	0.5182	11.9
239	55.4	25.217	20	53.88	40.62	0.364	0.5183	11.93
240	55.4	25.215	20	53.88	40.62	0.3641	0.5183	11.93
241	55.2	25.234	20	53.89	40.63	0.3639	0.5184	11.92
242	55.4	25.215	20	53.92	40.64	0.3642	0.5185	11.99
243	55.4	25.208	20	53.9	40.62	0.364	0.5185	11.96
244	55.2	25.239	20	53.91	40.65	0.3642	0.5185	11.94
245	55.4	25.217	20	53.94	40.65	0.3642	0.5186	12.02
246	55.1	25.259	20	53.93	40.67	0.3641	0.5187	11.97
247	55	25.266	20	53.95	40.69	0.3641	0.5189	11.98
248	55.2	25.242	20	53.95	40.67	0.3641	0.5188	12
249	55.1	25.256	20	53.96	40.69	0.3641	0.5187	12.01
250	55.2	25.248	20	53.97	40.69	0.3643	0.5189	12.04
251	55.1	25.26	20	53.98	40.7	0.3641	0.5189	12.04
252	55	25.265	20	53.99	40.71	0.3642	0.5191	12.05
253	55.1	25.257	20	53.97	40.69	0.3642	0.519	12.02
254	55	25.267	20	54.01	40.72	0.3642	0.5191	12.07
255	54.8	25.297	20	53.96	40.71	0.3642	0.519	11.98
256	54.7	25.313	20	53.98	40.73	0.3642	0.5193	11.99
257	54.8	25.299	20	54	40.74	0.3642	0.5193	12.04
258	54.9	25.29	20	54.01	40.73	0.3643	0.5191	12.06
259	54.6	25.324	20	54.02	40.76	0.3642	0.5193	12.04
260	54.7	25.309	20	54.02	40.75	0.3643	0.5194	12.05
261	54.7	25.312	20	54.03	40.76	0.3644	0.5197	12.07
262	54.8	25.301	20	54.03	40.76	0.3645	0.5197	12.09
263	54.8	25.302	20	54.03	40.75	0.3644	0.5198	12.08
264	54.7	25.314	20	54.05	40.77	0.3644	0.5198	12.1
265	54.6	25.329	20	54.04	40.78	0.3645	0.5196	12.07
266	54.4	25.353	20	54.06	40.8	0.3644	0.5198	12.07
267	54.5	25.337	20	54.06	40.79	0.3643	0.5197	12.09
268	54.6	25.324	20	54.06	40.78	0.3643	0.5199	12.11
269	54.5	25.342	20	54.08	40.8	0.3646	0.52	12.12
270	54.6	25.331	20	54.07	40.79	0.3644	0.52	12.12
271	54.6	25.322	20	54.11	40.81	0.3645	0.5203	12.18
272	54.6	25.333	20	54.1	40.81	0.3645	0.5201	12.16
273	54.3	25.369	20	54.09	40.83	0.3647	0.5202	12.11
274	54.5	25.349	20	54.09	40.82	0.3646	0.5203	12.13
275	54.3	25.38	20	54.09	40.83	0.3646	0.5204	12.09
276	54.3	25.374	20	54.11	40.84	0.3648	0.5206	12.14
277	54.5	25.349	20	54.08	40.81	0.3661	0.5223	12.11
278	54.5	25.346	20	54.11	40.82	0.3647	0.5204	12.16
279	54.5	25.347	20	54.09	40.82	0.3647	0.5202	12.14
280	54.4	25.363	20	54.1	40.83	0.3654	0.5212	12.12
281	54.4	25.355	20	54.09	40.82	0.3651	0.5211	12.12
282	54.6	25.331	20	54.09	40.8	0.3646	0.5203	12.15
283	54.5	25.336	20	54.11	40.82	0.3646	0.5203	12.18
284	54.4	25.352	20	54.04	40.79	0.3659	0.522	12.05
285	54.4	25.353	20	54.02	40.78	0.3657	0.5215	12.01
286	54.6	25.324	20	54.02	40.76	0.3654	0.5212	12.04
287	54.7	25.318	20	53.98	40.74	0.3652	0.5207	11.98
288	54.9	25.291	20	53.98	40.72	0.3642	0.5192	12.01
289	55.3	25.22	20	53.9	40.63	0.3642	0.5185	11.96
290	55.7	25.175	20	53.84	40.57	0.3648	0.519	11.9
291	56.1	25.109	20	53.72	40.47	0.3651	0.5189	11.78
292	56.6	25.048	20	53.65	40.39	0.3648	0.5181	11.73
293	56.9	24.996	20	53.57	40.31	0.3643	0.517	11.65
294	57.4	24.932	20	53.45	40.21	0.3641	0.5161	11.53
295	57.9	24.858	20	53.37	40.12	0.3632	0.5142	11.49
296	58.9	24.735	20	53.27	39.98	0.3623	0.5123	11.45
297	59.2	24.687	20	53.16	39.9	0.3617	0.5109	11.33
298	60.6	24.512	20	52.9	39.65	0.3608	0.5084	11.12
299	61	24.463	20	52.78	39.55	0.3599	0.5064	10.98
300	61.9	24.35	20	52.65	39.41	0.3596	0.5054	10.91
301	62.7	24.26	20	52.5	39.26	0.3599	0.505	10.77
302	63.4	24.174	20	52.37	39.14	0.3593	0.5036	10.68
303	64.3	24.067	20	52.23	39	0.3591	0.5028	10.59
304	64.5	24.046	20	52.12	38.92	0.3583	0.5009	10.45
305	65.4	23.944	20	51.99	38.79	0.3579	0.4996	10.38
306	66.1	23.869	20	51.88	38.68	0.3574	0.4983	10.3
307	66.7	23.798	20	51.76	38.57	0.357	0.4973	10.2
308	67.4	23.73	20	51.63	38.46	0.3567	0.4964	10.1
309	67.7	23.695	20	51.53	38.38	0.3559	0.4949	10
310	68.7	23.593	20	51.42	38.25	0.3556	0.4937	9.94
311	69.3	23.529	20	51.33	38.16	0.3551	0.4926	9.89
312	69.9	23.47	20	51.22	38.06	0.3547	0.4915	9.8
313	70.5	23.414	20	51.13	37.98	0.3543	0.4905	9.74
314	71.3	23.33	20	51.03	37.87	0.3539	0.4894	9.69
315	72.1	23.253	20	50.93	37.77	0.3536	0.4885	9.63
316	72.1	23.252	20	50.84	37.72	0.3532	0.4876	9.53
317	72.9	23.175	20	50.75	37.62	0.3528	0.4864	9.49
318	73.4	23.128	20	50.67	37.54	0.3524	0.4856	9.43
319	73.9	23.089	20	50.58	37.47	0.3522	0.485	9.36
320	74.4	23.039	20	50.49	37.39	0.3518	0.4838	9.3
321	75.1	22.977	20	50.44	37.32	0.3515	0.4832	9.29
322	75.4	22.954	20	50.33	37.25	0.3549	0.4874	9.19
323	76.1	22.889	20	50.36	37.22	0.3477	0.4775	9.27
324	76.1	22.885	20	50.27	37.17	0.3468	0.476	9.17
325	77.1	22.806	20	50.2	37.08	0.3466	0.4753	9.15
326	77.4	22.774	20	50.11	37.01	0.3491	0.4785	9.08
327	78	22.73	20	49.98	36.91	0.3525	0.4825	8.97
328	78.3	22.704	20	49.93	36.86	0.3523	0.4821	8.94
329	78.8	22.659	20	49.84	36.79	0.3519	0.481	8.88
330	79.3	22.621	20	49.8	36.74	0.3515	0.4804	8.87
331	79.9	22.57	20	49.71	36.66	0.351	0.4792	8.81
332	80.3	22.542	20	49.64	36.6	0.3506	0.4784	8.75
333	80.5	22.523	20	49.61	36.57	0.3503	0.4778	8.74
334	80.9	22.49	20	49.52	36.5	0.35	0.4772	8.67
335	81.1	22.472	20	49.48	36.47	0.35	0.4769	8.64
336	81.3	22.462	20	49.42	36.43	0.3496	0.4762	8.59
337	82.2	22.392	20	49.39	36.37	0.3496	0.4758	8.61
338	82.1	22.4	20	49.35	36.35	0.3493	0.4752	8.57
339	82.7	22.354	20	49.29	36.29	0.3492	0.475	8.54
340	82.9	22.34	20	49.25	36.26	0.349	0.4744	8.51
341	83.5	22.289	20	49.21	36.2	0.3488	0.4742	8.5
342	83.4	22.296	20	49.17	36.18	0.3486	0.4736	8.46
343	83.7	22.278	20	49.13	36.15	0.3485	0.4732	8.44
344	84.2	22.236	20	49.09	36.1	0.3486	0.4731	8.43
345	84.4	22.227	20	49.07	36.09	0.348	0.4723	8.41
346	84.6	22.21	20	49.03	36.05	0.348	0.4722	8.38
347	84.8	22.193	20	49	36.02	0.3478	0.4717	8.37
348	84.9	22.189	20	48.96	36	0.3478	0.4716	8.34
349	85.2	22.164	20	48.91	35.96	0.3481	0.4718	8.3
350	85.3	22.157	20	48.9	35.95	0.3474	0.471	8.3
351	85.6	22.135	20	48.86	35.91	0.3475	0.4707	8.28
352	85.8	22.124	20	48.85	35.9	0.3472	0.4704	8.27
353	86	22.108	20	48.81	35.86	0.3472	0.4701	8.24
354	86.2	22.093	20	48.76	35.83	0.3472	0.4703	8.21
355	86.9	22.045	20	48.78	35.81	0.3468	0.4694	8.26
356	86.7	22.056	20	48.74	35.79	0.3468	0.4693	8.21
357	86.8	22.05	20	48.71	35.77	0.3466	0.469	8.19
358	87.2	22.023	20	48.69	35.74	0.3466	0.4687	8.19
359	87.1	22.03	20	48.65	35.73	0.3468	0.4689	8.15
360	87.5	22.005	20	48.64	35.71	0.3463	0.4683	8.16
361	87.7	21.992	20	48.62	35.69	0.3464	0.4681	8.15
362	87.9	21.972	20	48.61	35.67	0.3461	0.4678	8.15
363	87.9	21.974	20	48.58	35.65	0.3462	0.4676	8.12
364	88.3	21.951	20	48.55	35.62	0.3463	0.4677	8.1
365	88.5	21.933	20	48.55	35.61	0.3458	0.4672	8.12
366	88.5	21.934	20	48.52	35.59	0.3461	0.4674	8.09
367	89	21.899	20	48.5	35.56	0.3462	0.4672	8.1
368	88.6	21.927	20	48.47	35.56	0.3464	0.4675	8.05
369	89	21.904	20	48.46	35.54	0.3458	0.4668	8.05
370	89.2	21.887	20	48.44	35.52	0.3458	0.4667	8.05
371	89.4	21.87	20	48.44	35.51	0.3458	0.4666	8.06
372	89.5	21.867	20	48.42	35.5	0.3458	0.4664	8.05
373	89.8	21.847	20	48.41	35.47	0.346	0.4666	8.05
374	90	21.831	20	48.38	35.45	0.3456	0.4661	8.03
375	89.6	21.861	20	48.37	35.46	0.3457	0.4661	8
376	89.9	21.842	20	48.36	35.45	0.3456	0.4659	8.01
377	90.3	21.816	20	48.34	35.42	0.3457	0.4657	8
378	90.1	21.827	20	48.33	35.42	0.3457	0.4658	7.99
379	90.2	21.819	20	48.3	35.4	0.3453	0.4653	7.96
380	90.3	21.815	20	48.28	35.39	0.3453	0.4653	7.95
381	90.4	21.805	20	48.28	35.38	0.3451	0.465	7.96
382	90.2	21.817	20	48.26	35.38	0.3453	0.4649	7.94
383	90.3	21.812	20	48.26	35.37	0.3453	0.4652	7.94
384	91	21.767	20	48.23	35.32	0.345	0.4646	7.93
385	90.8	21.782	20	48.24	35.34	0.345	0.4645	7.94
386	90.9	21.776	20	48.22	35.32	0.3449	0.4643	7.92
387	91.1	21.763	20	48.2	35.3	0.3448	0.4643	7.91
388	91.7	21.72	20	48.21	35.28	0.3451	0.4647	7.95
389	91.1	21.759	20	48.15	35.28	0.3448	0.464	7.87
390	91.1	21.764	20	48.17	35.29	0.3446	0.4639	7.88
391	91.4	21.745	20	48.15	35.27	0.3447	0.4639	7.88
392	91.7	21.721	20	48.15	35.25	0.3447	0.4639	7.9
393	91.6	21.729	20	48.15	35.26	0.3446	0.4636	7.89
394	91.9	21.707	20	48.12	35.23	0.3447	0.4637	7.88
395	92	21.701	20	48.11	35.22	0.3447	0.4636	7.87
396	91.9	21.713	20	48.11	35.22	0.3446	0.4635	7.86
397	91.9	21.708	20	48.09	35.21	0.3445	0.4634	7.85
398	92.2	21.689	20	48.1	35.2	0.3446	0.4634	7.87
399	92.3	21.686	20	48.07	35.18	0.3446	0.4633	7.84
400	92.5	21.674	20	48.08	35.18	0.3447	0.4635	7.86
401	92.5	21.675	20	48.07	35.17	0.3449	0.4638	7.85
402	92.5	21.67	20	48.08	35.18	0.3446	0.4633	7.86
403	92.6	21.667	20	48.05	35.16	0.3445	0.463	7.84
404	92.8	21.653	20	48.03	35.14	0.3445	0.463	7.83
405	92.5	21.673	20	48.04	35.16	0.3445	0.4629	7.83
406	92.6	21.667	20	48.02	35.14	0.3445	0.4629	7.81
407	92.6	21.665	20	48.01	35.13	0.3445	0.4629	7.8
408	93.1	21.637	20	48.02	35.12	0.3443	0.4626	7.83
409	93.2	21.626	20	48.01	35.11	0.3443	0.4626	7.83
410	93.3	21.621	20	48	35.1	0.3442	0.4622	7.82
411	93	21.641	20	47.97	35.1	0.3443	0.4625	7.79
412	93.2	21.631	20	48	35.11	0.3441	0.4623	7.82
413	93.2	21.631	20	47.96	35.09	0.3441	0.4622	7.78
414	93.1	21.637	20	47.94	35.08	0.3444	0.4625	7.77
415	93.5	21.611	20	47.94	35.06	0.3439	0.4618	7.78
416	93.4	21.614	20	47.92	35.06	0.3441	0.4619	7.76
417	93.2	21.627	20	47.93	35.07	0.344	0.4619	7.76
418	93.7	21.597	20	47.92	35.04	0.344	0.4618	7.77
419	93.9	21.586	20	47.92	35.04	0.3437	0.4616	7.78
420	93.8	21.594	20	47.9	35.03	0.344	0.462	7.76
421	93.7	21.6	20	47.9	35.03	0.344	0.4618	7.75
422	94	21.577	20	47.89	35.01	0.3438	0.4615	7.76
423	94.2	21.569	20	47.9	35.01	0.3439	0.4617	7.77
424	94.2	21.566	20	47.89	35.01	0.3437	0.4614	7.77
425	94	21.579	20	47.85	34.99	0.3439	0.4614	7.72
426	94.1	21.575	20	47.87	35	0.3439	0.4615	7.74
427	94.2	21.568	20	47.87	35	0.3436	0.4612	7.75
428	94	21.576	20	47.85	34.99	0.3437	0.4611	7.72
429	94.1	21.573	20	47.86	35	0.3435	0.461	7.74
430	94.8	21.532	20	47.84	34.95	0.3435	0.4609	7.74
431	94	21.577	20	47.83	34.98	0.3437	0.461	7.71
432	94.4	21.553	20	47.8	34.95	0.3436	0.4608	7.7
433	94.3	21.561	20	47.84	34.97	0.3435	0.461	7.72
434	94.3	21.558	20	47.8	34.95	0.3435	0.4607	7.69
435	94.7	21.537	20	47.81	34.94	0.3433	0.4605	7.71
436	95	21.516	20	47.79	34.92	0.3435	0.4606	7.71
437	95	21.517	20	47.79	34.92	0.3433	0.4605	7.71
438	94.6	21.543	20	47.8	34.94	0.3437	0.4609	7.7
439	95.1	21.515	20	47.78	34.91	0.3435	0.4604	7.7
440	94.9	21.522	20	47.79	34.92	0.3431	0.4603	7.71
441	94.4	21.556	20	47.85	34.98	0.3375	0.453	7.74
442	94.8	21.531	20	47.92	35	0.3349	0.4496	7.81
443	95	21.518	20	47.89	34.97	0.3349	0.4495	7.79
444	94.9	21.525	20	47.89	34.98	0.3349	0.4494	7.79
445	94.5	21.551	20	47.85	34.97	0.3396	0.4553	7.74
446	95.4	21.496	20	47.81	34.91	0.34	0.456	7.74
447	95.4	21.492	20	47.82	34.92	0.3397	0.4555	7.75
448	95.4	21.493	20	47.83	34.92	0.3399	0.4558	7.75
449	95.3	21.5	20	47.8	34.91	0.3397	0.4555	7.73
450	95.4	21.493	20	47.81	34.91	0.3395	0.4552	7.74
451	95.6	21.48	20	47.78	34.89	0.3396	0.4553	7.72
452	95.4	21.492	20	47.78	34.9	0.3394	0.4549	7.72
453	95.5	21.486	20	47.81	34.91	0.3371	0.4521	7.75
454	95.5	21.488	20	47.8	34.9	0.3371	0.4521	7.73
455	95.5	21.486	20	47.81	34.91	0.3373	0.4522	7.74
456	96	21.46	20	47.79	34.88	0.3377	0.4528	7.75
457	95.5	21.486	20	47.74	34.87	0.3402	0.4561	7.69
458	95.5	21.486	20	47.82	34.91	0.3344	0.4484	7.75
459	95.4	21.496	20	47.8	34.91	0.3343	0.4483	7.73
460	95.9	21.467	20	47.81	34.9	0.3345	0.4486	7.76
461	95.8	21.468	20	47.77	34.87	0.337	0.4517	7.72
462	95.9	21.465	20	47.73	34.85	0.3396	0.4551	7.69
463	96.1	21.455	20	47.71	34.83	0.3394	0.4547	7.68
464	96.1	21.45	20	47.72	34.84	0.3392	0.4548	7.69
465	96.2	21.447	20	47.72	34.83	0.3392	0.4545	7.69
466	96.2	21.447	20	47.7	34.82	0.3392	0.4546	7.67
467	95.9	21.463	20	47.71	34.84	0.3392	0.4545	7.68
468	96.7	21.419	20	47.69	34.8	0.3393	0.4544	7.69
469	96.4	21.433	20	47.71	34.82	0.3392	0.4545	7.69
470	96.6	21.425	20	47.65	34.78	0.3442	0.4608	7.65
471	96.6	21.424	20	47.64	34.78	0.3421	0.4581	7.64
472	96.4	21.432	20	47.64	34.78	0.3403	0.4558	7.63
473	96.8	21.41	20	47.64	34.76	0.3404	0.4558	7.64
474	96.8	21.41	20	47.63	34.76	0.3414	0.457	7.63
475	97.4	21.378	20	47.57	34.71	0.3486	0.4663	7.61
476	96.8	21.413	20	47.48	34.68	0.3456	0.4623	7.52
477	96.7	21.418	20	47.6	34.75	0.339	0.4538	7.61
478	97.3	21.384	20	47.62	34.74	0.3352	0.4489	7.65
479	97.1	21.394	20	47.65	34.76	0.3352	0.4489	7.67
480	97.3	21.384	20	47.63	34.74	0.3351	0.4489	7.65
481	96.9	21.402	20	47.65	34.77	0.3359	0.4498	7.66
482	96.8	21.41	20	47.66	34.78	0.3336	0.447	7.66
483	97	21.398	20	47.66	34.77	0.3335	0.4468	7.67
484	97.2	21.39	20	47.66	34.77	0.3338	0.447	7.68
485	97.3	21.38	20	47.62	34.73	0.3371	0.4514	7.65
486	97.4	21.376	20	47.58	34.71	0.3367	0.4508	7.61
487	97.4	21.376	20	47.57	34.71	0.3362	0.45	7.61
488	97.5	21.371	20	47.57	34.7	0.3357	0.4495	7.61
489	97.2	21.386	20	47.63	34.74	0.3356	0.4493	7.65
490	97.1	21.391	20	47.64	34.75	0.3337	0.4469	7.66
491	97.5	21.369	20	47.63	34.74	0.3352	0.4489	7.67
492	97.2	21.386	20	47.61	34.73	0.335	0.4486	7.64
493	97.7	21.36	20	47.6	34.71	0.3365	0.4503	7.64
494	97.2	21.387	20	47.59	34.72	0.3378	0.452	7.62
495	98.2	21.33	20	47.57	34.67	0.339	0.4533	7.64
496	97.4	21.376	20	47.57	34.7	0.3364	0.45	7.61
497	97.7	21.358	20	47.56	34.69	0.3343	0.4472	7.61
498	97.6	21.366	20	47.56	34.69	0.3359	0.4493	7.61
499	97.9	21.349	20	47.53	34.67	0.3376	0.4515	7.59
500	97.7	21.359	20	47.52	34.67	0.338	0.4521	7.58
501	97.9	21.346	20	47.51	34.65	0.3385	0.4527	7.58
502	98	21.344	20	47.51	34.65	0.3379	0.452	7.58
503	98.2	21.327	20	47.51	34.64	0.3379	0.452	7.59
504	98.3	21.327	20	47.5	34.63	0.3365	0.4502	7.58
505	97.9	21.346	20	47.49	34.64	0.337	0.4507	7.56
506	98.1	21.338	20	47.47	34.62	0.3386	0.4527	7.55
507	98.2	21.328	20	47.5	34.64	0.338	0.4522	7.58
508	98	21.341	20	47.47	34.63	0.338	0.4519	7.55
509	98.1	21.338	20	47.48	34.63	0.338	0.4517	7.55
510	99.1	21.28	20	47.49	34.6	0.338	0.4517	7.6
511	98.4	21.319	20	47.46	34.61	0.3385	0.4522	7.55
512	98.4	21.317	20	47.46	34.6	0.3379	0.4517	7.55
513	98.9	21.288	20	47.46	34.58	0.3374	0.4511	7.57
514	98.9	21.289	20	47.47	34.59	0.3369	0.4505	7.58
515	98.6	21.307	20	47.46	34.6	0.3368	0.4505	7.56
516	99	21.288	20	47.46	34.58	0.3381	0.4518	7.57
517	98.8	21.297	20	47.45	34.58	0.3363	0.4496	7.55
518	98.5	21.312	20	47.44	34.59	0.3364	0.4496	7.54
519	98.3	21.323	20	47.45	34.6	0.3376	0.4514	7.54
520	98.5	21.314	20	47.42	34.58	0.3371	0.4507	7.53

## Sheet: O2-high-2.4-fwd-2
Colibri Photonics GmbH Ibidi-OPAL	Dezimaltrennzeichen: Komma				spot:	B	gasflow:	high	pumppress:	50 kPa
2016-02-17	1899-12-31 18:34:05				frequency:	2.4 Hz	dir:	fwd	pumpvac:	-50 kPa
tau100 = 21,130 Âµs @ 20 Â°C	tau0 = 59,000 Âµs @ 20 Â°C	f = 0,75			pumpgas:	O2	(gemeinsamer Bubbler)
T-Korr von tau100 = -0,0272 Âµs / Â°C	T-Korr von tau0 = -0,0203 Âµs / Â°C
Freq 1 = 11,993 kHz	Freq 2 = 6,323 kHz
Zeit / s	O2-Gehalt / %-Luft	tau / Âµs	T / Â°C	Phase1 / Â° @ 11,993 kHz	Phase2 / Â° @ 6,323 kHz	Amplitude1 / V p-p	Amplitude2 / V p-p	Signal : Untergrund		t korrigiert	O2 korrigiert
1	99.9	21.136	20	47.09	34.28	0.3331	0.4441	7.36		1	100.6
2	100.2	21.117	20	47.13	34.29	0.3326	0.4435	7.4		2	100.7
3	99.7	21.144	20	47.11	34.3	0.3329	0.4437	7.37		3	100.3
4	100.3	21.115	20	47.12	34.28	0.3348	0.4462	7.39		4	100.8
5	100.3	21.111	20	47.1	34.27	0.3346	0.446	7.38		5	100.8
6	100.1	21.125	20	47.09	34.27	0.3358	0.4474	7.36		6	100.8
7	100	21.129	20	47.08	34.27	0.3345	0.4458	7.35		7	100.4
8	100.4	21.109	20	47.08	34.26	0.3324	0.4429	7.37		8	101.1
9	100.6	21.098	20	47.1	34.26	0.3319	0.4425	7.39		9	100.8
10	100	21.128	20	47.07	34.27	0.3327	0.4434	7.35		10	100.1
11	100.1	21.125	20	47.11	34.29	0.3304	0.4406	7.38		11	101
12	100.2	21.121	20	47.09	34.28	0.3324	0.4431	7.37		12	100.5
13	100	21.131	20	47.08	34.28	0.3324	0.4432	7.36		13	100.7
14	100.6	21.096	20	47.06	34.24	0.3339	0.4449	7.36		14	101.1
15	100.7	21.091	20	47.06	34.24	0.335	0.4463	7.36		15	100.5
16	100.2	21.118	20	47.08	34.27	0.3346	0.4459	7.36		16	100.8
17	100.9	21.083	20	47.06	34.23	0.3345	0.4457	7.37		17	100.6
18	100.5	21.101	20	47.07	34.25	0.3344	0.4456	7.37		18	100.7
19	100.5	21.101	20	47.04	34.24	0.3349	0.4461	7.34		19	101.2
20	100.6	21.099	20	47.07	34.25	0.3353	0.4467	7.36		20	100.8
21	100.4	21.109	20	47.04	34.24	0.3349	0.446	7.34		21	101.1
22	100.7	21.095	20	47.04	34.23	0.3339	0.4449	7.34		22	101
23	100.6	21.098	20	47.05	34.24	0.3349	0.4462	7.35		23	101
24	100.5	21.101	20	47.04	34.23	0.3341	0.4451	7.34		24	101.1
25	100.6	21.098	20	47.06	34.24	0.3347	0.4459	7.35		25	101
26	100.6	21.096	20	47.03	34.23	0.3358	0.4473	7.34		26	101
27	100.8	21.085	20	47.04	34.22	0.3375	0.4493	7.35		27	100.7
28	100.6	21.097	20	47.08	34.25	0.3342	0.4454	7.37		28	100.7
29	100.8	21.085	20	47.06	34.23	0.3338	0.445	7.36		29	100.9
30	100.1	21.123	20	47.07	34.26	0.3338	0.445	7.35		30	100.8
31	100.4	21.108	20	47.06	34.25	0.3349	0.4463	7.35		31	100.5
32	100.7	21.094	20	47.07	34.24	0.3355	0.4471	7.37		32	100.2
33	100.1	21.125	20	47.07	34.27	0.3349	0.4463	7.35		33	99.4
34	100.5	21.102	20	47.06	34.24	0.3342	0.4455	7.35		34	99.2
35	100.6	21.098	20	47.04	34.23	0.3335	0.4447	7.34		35	98.7
36	100.8	21.087	20	47.03	34.22	0.3344	0.4458	7.34		36	97.8
37	100.6	21.097	20	47	34.21	0.3344	0.4455	7.31		37	97.6
38	100.4	21.108	20	47.02	34.23	0.333	0.4438	7.32		38	96.7
39	100.8	21.088	20	47.02	34.21	0.3329	0.444	7.33		39	96.3
40	100.9	21.082	20	47.01	34.21	0.3337	0.4449	7.33		40	95.2
41	101.1	21.073	20	47.02	34.2	0.3355	0.4468	7.34		41	95
42	100.7	21.092	20	47.02	34.22	0.3341	0.4453	7.33		42	94.2
43	100.6	21.099	20	47.03	34.23	0.3319	0.4427	7.33		43	93.4
44	100.7	21.091	20	47.03	34.22	0.3323	0.443	7.33		44	93.2
45	100.3	21.114	20	47.03	34.24	0.3325	0.4435	7.33		45	91.8
46	100.8	21.089	20	47	34.2	0.3343	0.4454	7.31		46	91.2
47	100.8	21.086	20	47.04	34.22	0.3321	0.4426	7.35		47	90.2
48	100.8	21.087	20	47.04	34.22	0.3317	0.4421	7.35		48	89.6
49	100.4	21.109	20	47.04	34.24	0.3311	0.4414	7.34		49	88.8
50	101.1	21.07	20	47.05	34.22	0.3322	0.4427	7.36		50	87.9
51	100.8	21.089	20	47.01	34.21	0.331	0.4413	7.32		51	86.8
52	100.1	21.126	20	47.04	34.25	0.329	0.439	7.33		52	86.4
53	101	21.077	20	47.05	34.22	0.3293	0.4395	7.36		53	86
54	100.5	21.103	20	47.04	34.23	0.3304	0.4408	7.34		54	85.4
55	100.7	21.093	20	47.03	34.22	0.3327	0.4436	7.34		55	84.5
56	101.1	21.072	20	47.06	34.22	0.3296	0.4396	7.37		56	83.6
57	100.5	21.1	20	47.04	34.23	0.3295	0.4395	7.34		57	83.3
58	100.8	21.089	20	47.05	34.23	0.3295	0.4394	7.36		58	82.4
59	100.6	21.1	20	47.04	34.23	0.3302	0.4402	7.34		59	81.8
60	100.7	21.093	20	47.01	34.21	0.3332	0.4439	7.32		60	81.3
61	101.2	21.065	20	47.02	34.2	0.3331	0.4438	7.34		61	80.8
62	100.8	21.084	20	47	34.2	0.3331	0.4437	7.32		62	79.9
63	101.1	21.069	20	47.01	34.2	0.3329	0.4436	7.34		63	79.6
64	101	21.078	20	47.01	34.2	0.3333	0.444	7.33		64	79.2
65	101	21.078	20	47.01	34.2	0.3333	0.4438	7.33		65	78.7
66	101.1	21.07	20	47.02	34.2	0.3337	0.4444	7.34		66	78
67	101	21.077	20	47.01	34.2	0.3335	0.4442	7.33		67	77.5
68	101	21.076	20	46.98	34.19	0.3333	0.444	7.31		68	77.1
69	100.7	21.09	20	47	34.21	0.3328	0.4435	7.32		69	76.6
70	100.7	21.094	20	47.03	34.23	0.3334	0.4443	7.34		70	75.7
71	100.9	21.079	20	47.05	34.22	0.3346	0.4456	7.36		71	75.8
72	100.8	21.085	20	47.05	34.23	0.3351	0.4463	7.36		72	75.3
73	100.5	21.104	20	47.11	34.27	0.335	0.4465	7.39		73	74.7
74	100.2	21.121	20	47.11	34.29	0.3349	0.4465	7.39		74	74.2
75	99.4	21.163	20	47.17	34.35	0.3351	0.4469	7.41		75	73.6
76	99.2	21.175	20	47.22	34.38	0.3354	0.4474	7.44		76	73.2
77	98.7	21.202	20	47.26	34.42	0.3357	0.4478	7.45		77	72.7
78	97.8	21.25	20	47.29	34.47	0.3365	0.4492	7.46		78	72.9
79	97.6	21.265	20	47.36	34.52	0.3379	0.4513	7.51		79	72.3
80	96.7	21.314	20	47.45	34.6	0.3384	0.4523	7.55		80	72
81	96.3	21.34	20	47.49	34.64	0.3388	0.453	7.57		81	71.4
82	95.2	21.404	20	47.58	34.73	0.3391	0.4537	7.6		82	71.1
83	95	21.417	20	47.67	34.79	0.3394	0.4545	7.67		83	70.9
84	94.2	21.464	20	47.74	34.86	0.3399	0.4555	7.7		84	70.6
85	93.4	21.514	20	47.83	34.94	0.3405	0.4567	7.75		85	70.3
86	93.2	21.526	20	47.91	34.99	0.3407	0.4572	7.81		86	69.9
87	91.8	21.609	20	48.01	35.1	0.3412	0.4583	7.84		87	69.6
88	91.2	21.651	20	48.1	35.17	0.3416	0.4592	7.89		88	69.5
89	90.2	21.712	20	48.19	35.27	0.3421	0.4602	7.94		89	69.1
90	89.6	21.75	20	48.3	35.35	0.3424	0.4611	8.01		90	68.3
91	88.8	21.808	20	48.37	35.43	0.343	0.4621	8.04		91	68.5
92	87.9	21.869	20	48.49	35.53	0.3432	0.4631	8.11		92	68.2
93	86.8	21.944	20	48.57	35.63	0.3438	0.464	8.13		93	67.8
94	86.4	21.972	20	48.67	35.7	0.3442	0.465	8.2		94	67.6
95	86	22	20	48.78	35.78	0.3447	0.466	8.29		95	67.4
96	85.4	22.037	20	48.87	35.85	0.3452	0.4671	8.35		96	67.3
97	84.5	22.105	20	48.97	35.95	0.3456	0.4683	8.4		97	67
98	83.6	22.171	20	49.06	36.04	0.3459	0.4689	8.43		98	66.8
99	83.3	22.195	20	49.12	36.09	0.3459	0.4693	8.48		99	66.6
100	82.4	22.262	20	49.2	36.18	0.3466	0.4705	8.51		100	66.3
101	81.8	22.309	20	49.29	36.26	0.3465	0.471	8.57		101	66.1
102	81.3	22.347	20	49.38	36.33	0.3469	0.4719	8.63		102	66
103	80.8	22.384	20	49.43	36.39	0.3473	0.4724	8.66		103	65.7
104	79.9	22.456	20	49.55	36.5	0.3477	0.4734	8.72		104	65.5
105	79.6	22.479	20	49.62	36.55	0.3483	0.4746	8.78		105	65.5
106	79.2	22.509	20	49.69	36.61	0.3484	0.4752	8.83		106	65.1
107	78.7	22.552	20	49.78	36.68	0.3487	0.4761	8.89		107	65.1
108	78	22.61	20	49.85	36.76	0.349	0.4766	8.93		108	65
109	77.5	22.653	20	49.91	36.82	0.3494	0.4776	8.96		109	64.9
110	77.1	22.685	20	49.98	36.88	0.3497	0.4783	9.01		110	64.6
111	76.6	22.725	20	50.06	36.95	0.3514	0.4807	9.07		111	64.6
112	75.7	22.802	20	50.16	37.05	0.3527	0.4832	9.11		112	64.4
113	75.8	22.797	20	50.21	37.08	0.3532	0.4841	9.17		113	64.1
114	75.3	22.839	20	50.32	37.17	0.3533	0.4849	9.26		114	64.4
115	74.7	22.891	20	50.36	37.22	0.3538	0.4858	9.26		115	64.1
116	74.2	22.935	20	50.44	37.29	0.354	0.4862	9.32		116	63.7
117	73.6	22.994	20	50.45	37.33	0.3535	0.4857	9.28		117	63.6
118	73.2	23.031	20	50.51	37.4	0.3537	0.4864	9.33		118	63.8
119	72.7	23.074	20	50.58	37.46	0.3538	0.4869	9.37		119	63.7
120	72.9	23.057	20	50.63	37.48	0.3543	0.4877	9.45		120	63.6
121	72.3	23.109	20	50.72	37.56	0.3545	0.4884	9.5		121	63.2
122	72	23.145	20	50.76	37.61	0.3547	0.4889	9.52		122	63.2
123	71.4	23.194	20	50.81	37.66	0.3549	0.4894	9.54		123	63.4
124	71.1	23.23	20	50.87	37.72	0.3552	0.4901	9.58		124	62.9
125	70.9	23.248	20	50.92	37.76	0.3555	0.4909	9.63		125	63
126	70.6	23.272	20	50.99	37.81	0.3557	0.4912	9.69		126	62.7
127	70.3	23.307	20	51.02	37.85	0.356	0.4918	9.69		127	62.7
128	69.9	23.348	20	51.09	37.91	0.3561	0.4923	9.74		128	62.8
129	69.6	23.376	20	51.12	37.95	0.3563	0.4928	9.76		129	62.6
130	69.5	23.387	20	51.18	37.99	0.3565	0.4934	9.82		130	62.4
131	69.1	23.419	20	51.22	38.03	0.3568	0.4938	9.85		131	62.2
132	68.3	23.504	20	51.3	38.13	0.3569	0.4948	9.87		132	62.3
133	68.5	23.482	20	51.34	38.14	0.3573	0.4953	9.94		133	62
134	68.2	23.511	20	51.4	38.19	0.3575	0.4958	9.98		134	62.1
135	67.8	23.554	20	51.42	38.23	0.3576	0.4962	9.98		135	62
136	67.6	23.573	20	51.47	38.27	0.3578	0.4965	10.02		136	61.7
137	67.4	23.596	20	51.51	38.3	0.3579	0.4969	10.05		137	61.9
138	67.3	23.61	20	51.55	38.33	0.358	0.4973	10.09		138	61.8
139	67	23.646	20	51.59	38.38	0.3582	0.4979	10.12		139	61.4
140	66.8	23.662	20	51.62	38.4	0.3583	0.4982	10.14		140	61.5
141	66.6	23.684	20	51.66	38.44	0.3586	0.4986	10.16		141	61.3
142	66.3	23.719	20	51.69	38.48	0.3587	0.4989	10.18		142	61.3
143	66.1	23.733	20	51.71	38.5	0.3588	0.4992	10.2		143	61.1
144	66	23.745	20	51.76	38.54	0.3588	0.4994	10.25		144	61
145	65.7	23.781	20	51.78	38.57	0.359	0.4999	10.25		145	61
146	65.5	23.804	20	51.82	38.6	0.3593	0.5003	10.27		146	60.8
147	65.5	23.799	20	51.86	38.62	0.3592	0.5006	10.33		147	60.8
148	65.1	23.848	20	51.86	38.65	0.3592	0.5005	10.28		148	60.6
149	65.1	23.842	20	51.91	38.68	0.3593	0.5009	10.35		149	60.6
150	65	23.857	20	51.95	38.71	0.3594	0.5011	10.4		150	60.3
151	64.9	23.864	20	51.97	38.73	0.3595	0.5014	10.42		151	60.2
152	64.6	23.905	20	52.01	38.77	0.3597	0.502	10.43		152	60.1
153	64.6	23.905	20	52.01	38.77	0.3597	0.5021	10.43		153	60.1
154	64.4	23.923	20	52.06	38.81	0.3598	0.5024	10.48		154	60.1
155	64.1	23.958	20	52.06	38.83	0.3601	0.5028	10.45		155	59.9
156	64.4	23.93	20	52.11	38.84	0.3603	0.503	10.54		156	60.1
157	64.1	23.954	20	52.15	38.88	0.3603	0.5033	10.58		157	59.8
158	63.7	24.005	20	52.13	38.9	0.3605	0.5036	10.5		158	59.9
159	63.6	24.022	20	52.18	38.94	0.3603	0.5036	10.55		159	59.7
160	63.8	23.994	20	52.18	38.92	0.3605	0.5039	10.58		160	59.6
161	63.7	24.008	20	52.19	38.94	0.3606	0.5043	10.58		161	59.5
162	63.6	24.012	20	52.23	38.96	0.3606	0.5043	10.63		162	59.6
163	63.2	24.068	20	52.23	39	0.3607	0.5043	10.59		163	59.5
164	63.2	24.064	20	52.28	39.02	0.3605	0.5043	10.65		164	59.2
165	63.4	24.039	20	52.29	39.01	0.3609	0.5048	10.69		165	59.2
166	62.9	24.103	20	52.31	39.06	0.361	0.5052	10.66		166	59.3
167	63	24.089	20	52.33	39.06	0.361	0.5053	10.69		167	59.1
168	62.7	24.124	20	52.33	39.09	0.3612	0.5055	10.66		168	59.1
169	62.7	24.123	20	52.37	39.11	0.3611	0.5055	10.72		169	58.9
170	62.8	24.111	20	52.38	39.1	0.3612	0.5057	10.74		170	59
171	62.6	24.135	20	52.4	39.13	0.3611	0.5059	10.75		171	58.9
172	62.4	24.152	20	52.39	39.14	0.3615	0.5066	10.72		172	58.9
173	62.2	24.185	20	52.43	39.18	0.3613	0.5063	10.76		173	58.8
174	62.3	24.173	20	52.46	39.19	0.3613	0.5065	10.8		174	58.7
175	62	24.209	20	52.46	39.21	0.3615	0.5067	10.77		175	58.8
176	62.1	24.197	20	52.51	39.23	0.3615	0.5069	10.84		176	58.3
177	62	24.2	20	52.5	39.23	0.3618	0.5073	10.83		177	58.4
178	61.7	24.247	20	52.53	39.27	0.3618	0.5074	10.83		178	58.2
179	61.9	24.217	20	52.56	39.27	0.3617	0.5074	10.9		179	58.3
180	61.8	24.235	20	52.57	39.29	0.3617	0.5077	10.9		180	58.4
181	61.4	24.279	20	52.59	39.32	0.3618	0.5081	10.88		181	58.1
182	61.5	24.261	20	52.6	39.32	0.362	0.5081	10.92		182	58.3
183	61.3	24.286	20	52.63	39.36	0.3619	0.5082	10.94		183	58.1
184	61.3	24.295	20	52.64	39.36	0.3619	0.5082	10.94		184	58.1
185	61.1	24.315	20	52.67	39.39	0.3621	0.5085	10.96		185	58
186	61	24.324	20	52.68	39.4	0.3622	0.5089	10.97		186	57.8
187	61	24.332	20	52.7	39.42	0.3624	0.5092	10.99		187	57.9
188	60.8	24.346	20	52.73	39.44	0.3623	0.5091	11.02		188	57.7
189	60.8	24.355	20	52.72	39.45	0.3623	0.5091	11		189	57.7
190	60.6	24.371	20	52.75	39.47	0.3623	0.5094	11.02		190	57.6
191	60.6	24.375	20	52.74	39.47	0.3624	0.5097	11.01		191	57.2
192	60.3	24.418	20	52.77	39.51	0.3625	0.5098	11.01		192	57.7
193	60.2	24.428	20	52.81	39.54	0.3627	0.5101	11.06		193	57.5
194	60.1	24.442	20	52.83	39.56	0.3627	0.5104	11.08		194	57.5
195	60.1	24.438	20	52.85	39.57	0.3629	0.5106	11.1		195	57.6
196	60.1	24.436	20	52.85	39.57	0.3631	0.5108	11.11		196	57.3
197	59.9	24.459	20	52.88	39.6	0.3629	0.5109	11.13		197	57.6
198	60.1	24.444	20	52.89	39.59	0.3628	0.5107	11.16		198	57.3
199	59.8	24.475	20	52.91	39.63	0.3629	0.5112	11.17		199	57.4
200	59.9	24.46	20	52.92	39.62	0.3631	0.5112	11.19		200	57.1
201	59.7	24.488	20	52.92	39.64	0.3635	0.5117	11.16		201	57.1
202	59.6	24.5	20	52.95	39.66	0.363	0.5116	11.2		202	57.2
203	59.5	24.508	20	52.95	39.67	0.3632	0.5115	11.19		203	57.2
204	59.6	24.505	20	53	39.69	0.3631	0.5117	11.26		204	57.1
205	59.5	24.51	20	52.99	39.69	0.3632	0.5118	11.25		205	57.1
206	59.2	24.556	20	53.02	39.74	0.3633	0.512	11.24		206	56.8
207	59.2	24.553	20	53.03	39.74	0.3633	0.5123	11.26		207	57
208	59.3	24.534	20	53.02	39.72	0.3634	0.5124	11.27		208	56.6
209	59.1	24.568	20	53.06	39.77	0.3633	0.5125	11.29		209	56.9
210	59.1	24.567	20	53.06	39.77	0.3636	0.5126	11.3		210	56.6
211	58.9	24.586	20	53.06	39.78	0.3637	0.5129	11.27		211	56.9
212	59	24.584	20	53.08	39.79	0.3636	0.5129	11.31		212	56.7
213	58.9	24.59	20	53.09	39.8	0.3636	0.5129	11.32		213	56.7
214	58.9	24.585	20	53.13	39.81	0.3637	0.5131	11.38		214	56.5
215	58.8	24.607	20	53.11	39.82	0.3637	0.5132	11.34		215	56.5
216	58.7	24.62	20	53.14	39.84	0.3636	0.5132	11.36		216	56.4
217	58.8	24.601	20	53.14	39.83	0.364	0.5139	11.38		217	56.2
218	58.3	24.665	20	53.16	39.88	0.3638	0.5138	11.35		218	56.4
219	58.4	24.659	20	53.18	39.89	0.3639	0.5137	11.38		219	56
220	58.2	24.682	20	53.17	39.9	0.364	0.5139	11.35		220	56.2
221	58.3	24.664	20	53.2	39.9	0.364	0.514	11.4		221	56.1
222	58.4	24.655	20	53.21	39.9	0.3642	0.5142	11.44		222	56.1
223	58.1	24.69	20	53.2	39.92	0.3642	0.5145	11.39		223	56.1
224	58.3	24.671	20	53.25	39.93	0.3641	0.5143	11.48		224	55.8
225	58.1	24.691	20	53.23	39.93	0.3642	0.5145	11.43		225	55.9
226	58.1	24.698	20	53.27	39.96	0.3642	0.5147	11.49		226	56.1
227	58	24.715	20	53.27	39.97	0.3642	0.5147	11.46		227	55.9
228	57.8	24.735	20	53.28	39.99	0.3642	0.5149	11.46		228	55.9
229	57.9	24.723	20	53.29	39.99	0.3645	0.5154	11.48		229	55.6
230	57.7	24.753	20	53.29	40.01	0.3643	0.515	11.47		230	55.8
231	57.7	24.749	20	53.33	40.03	0.3644	0.5153	11.53		231	55.7
232	57.6	24.758	20	53.33	40.03	0.3644	0.5154	11.51		232	55.5
233	57.2	24.814	20	53.34	40.07	0.3643	0.5155	11.48		233	55.7
234	57.7	24.749	20	53.36	40.04	0.3644	0.5154	11.58		234	55.5
235	57.5	24.783	20	53.37	40.07	0.3645	0.5157	11.54		235	55.7
236	57.5	24.777	20	53.38	40.07	0.3646	0.5156	11.57		236	55.5
237	57.6	24.758	20	53.37	40.05	0.3647	0.5162	11.58		237	55.4
238	57.3	24.801	20	53.42	40.11	0.3645	0.5161	11.61		238	55.5
239	57.6	24.764	20	53.41	40.08	0.3646	0.516	11.63		239	55.6
240	57.3	24.81	20	53.43	40.12	0.3649	0.5163	11.62		240	55.4
241	57.4	24.797	20	53.42	40.11	0.3647	0.5161	11.62		241	55.1
242	57.1	24.834	20	53.41	40.12	0.3648	0.5164	11.56		242	55.2
243	57.1	24.825	20	53.45	40.14	0.3648	0.5167	11.63		243	55.4
244	57.2	24.824	20	53.42	40.12	0.3649	0.5166	11.59		244	55.4
245	57.2	24.815	20	53.47	40.14	0.3648	0.5166	11.67		245	55.2
246	57.1	24.831	20	53.47	40.15	0.3648	0.5166	11.65		246	55.2
247	57.1	24.833	20	53.47	40.15	0.3649	0.5167	11.65		247	55.2
248	56.8	24.867	20	53.49	40.19	0.365	0.5169	11.65		248	55.1
249	57	24.839	20	53.48	40.17	0.365	0.517	11.67		249	55.1
250	56.6	24.896	20	53.5	40.21	0.3649	0.517	11.64		250	55.1
251	56.9	24.856	20	53.5	40.19	0.365	0.5172	11.68		251	55.1
252	56.6	24.894	20	53.51	40.21	0.3662	0.519	11.65		252	55.3
253	56.9	24.862	20	53.53	40.21	0.3665	0.5194	11.72		253	55.3
254	56.7	24.886	20	53.51	40.21	0.3664	0.5192	11.66		254	55.5
255	56.7	24.893	20	53.53	40.23	0.3664	0.5193	11.7		255	55.4
256	56.5	24.921	20	53.52	40.24	0.3666	0.5196	11.66		256	55.4
257	56.5	24.91	20	53.56	40.25	0.3667	0.5198	11.72		257	55.4
258	56.4	24.933	20	53.55	40.26	0.3666	0.5199	11.69		258	55.5
259	56.2	24.952	20	53.58	40.29	0.3665	0.5199	11.71		259	55.6
260	56.4	24.925	20	53.59	40.28	0.3668	0.5202	11.75		260	55.5
261	56	24.979	20	53.61	40.32	0.3667	0.5201	11.72		261	55.6
262	56.2	24.957	20	53.63	40.32	0.3669	0.5205	11.78		262	55.7
263	56.1	24.966	20	53.61	40.32	0.3669	0.5206	11.75		263	55.7
264	56.1	24.974	20	53.65	40.34	0.3668	0.5206	11.8		264	55.7
265	56.1	24.967	20	53.63	40.33	0.3671	0.5209	11.78		265	55.6
266	55.8	25.006	20	53.67	40.37	0.3668	0.5208	11.79		266	55.8
267	55.9	24.999	20	53.66	40.36	0.367	0.5211	11.78		267	55.5
268	56.1	24.972	20	53.68	40.36	0.367	0.521	11.84		268	55.4
269	55.9	25.003	20	53.68	40.38	0.367	0.5212	11.82		269	55.7
270	55.9	24.994	20	53.68	40.37	0.367	0.5211	11.83		270	55.7
271	55.6	25.037	20	53.7	40.41	0.3669	0.5212	11.82		271	55.5
272	55.8	25.019	20	53.7	40.4	0.367	0.5212	11.84		272	55.9
273	55.7	25.032	20	53.71	40.41	0.367	0.5211	11.83		273	56
274	55.5	25.06	20	53.72	40.43	0.3671	0.5212	11.82		274	56.3
275	55.7	25.032	20	53.73	40.42	0.3672	0.5215	11.87		275	56.4
276	55.5	25.054	20	53.74	40.44	0.3671	0.5216	11.87		276	56.7
277	55.7	25.032	20	53.75	40.43	0.3672	0.5214	11.9		277	56.8
278	55.5	25.06	20	53.75	40.45	0.3672	0.5217	11.87		278	57
279	55.4	25.062	20	53.77	40.46	0.3671	0.5218	11.91		279	57.4
280	55.5	25.06	20	53.76	40.45	0.3672	0.5217	11.88		280	57.6
281	55.6	25.04	20	53.78	40.45	0.3672	0.522	11.93		281	58.3
282	55.4	25.062	20	53.77	40.46	0.3673	0.5222	11.91		282	58.9
283	55.1	25.117	20	53.79	40.51	0.3672	0.522	11.88		283	59.8
284	55.2	25.092	20	53.79	40.49	0.3674	0.5222	11.91		284	60.1
285	55.4	25.073	20	53.81	40.49	0.3674	0.5223	11.96		285	60.7
286	55.4	25.066	20	53.84	40.5	0.3676	0.5227	12		286	61.2
287	55.2	25.101	20	53.81	40.51	0.3676	0.5228	11.93		287	61.7
288	55.2	25.102	20	53.84	40.52	0.3676	0.5227	11.97		288	62.1
289	55.2	25.093	20	53.82	40.51	0.3677	0.5227	11.94		289	62.7
290	55.1	25.108	20	53.85	40.53	0.3678	0.5229	11.98		290	63.4
291	55.1	25.109	20	53.83	40.53	0.3687	0.5241	11.96		291	63.9
292	55.1	25.105	20	53.79	40.5	0.3711	0.5276	11.89		292	64.5
293	55.1	25.114	20	53.8	40.51	0.3705	0.5267	11.89		293	65
294	55.3	25.084	20	53.77	40.48	0.3706	0.5267	11.88		294	66
295	55.3	25.088	20	53.78	40.48	0.3704	0.5265	11.89		295	66.2
296	55.5	25.06	20	53.78	40.47	0.3707	0.5269	11.92		296	66.6
297	55.4	25.067	20	53.75	40.46	0.3711	0.527	11.87		297	67.3
298	55.4	25.066	20	53.75	40.45	0.3706	0.5265	11.86		298	67.9
299	55.4	25.068	20	53.73	40.44	0.3706	0.5264	11.83		299	68.4
300	55.5	25.059	20	53.73	40.44	0.3702	0.526	11.84		300	68.9
301	55.6	25.035	20	53.73	40.42	0.3707	0.5265	11.86		301	69.4
302	55.5	25.055	20	53.72	40.43	0.3703	0.5259	11.83		302	70.1
303	55.6	25.037	20	53.72	40.42	0.3702	0.5258	11.85		303	70.5
304	55.7	25.029	20	53.72	40.42	0.3699	0.5254	11.86		304	70.8
305	55.7	25.033	20	53.72	40.42	0.3697	0.5251	11.85		305	71.6
306	55.7	25.021	20	53.72	40.41	0.37	0.5256	11.87		306	72.2
307	55.6	25.034	20	53.88	40.5	0.3599	0.5114	12.1		307	72.8
308	55.8	25.019	20	53.9	40.5	0.3591	0.5104	12.15		308	73.4
309	55.5	25.059	20	53.88	40.52	0.3591	0.5103	12.08		309	73.9
310	55.4	25.073	20	53.91	40.54	0.3596	0.5111	12.11		310	74.1
311	55.7	25.031	20	53.87	40.49	0.3618	0.5139	12.09		311	74.7
312	55.7	25.019	20	53.88	40.49	0.3608	0.5127	12.12		312	75.1
313	55.5	25.059	20	53.86	40.51	0.3609	0.5126	12.04		313	75.5
314	55.9	24.995	20	53.85	40.46	0.3612	0.513	12.09		314	76
315	56	24.982	20	53.8	40.43	0.3629	0.5152	12.03		315	76.8
316	56.3	24.948	20	53.73	40.37	0.3637	0.5163	11.95		316	77.2
317	56.4	24.928	20	53.69	40.33	0.3631	0.5151	11.9		317	77.5
318	56.7	24.892	20	53.64	40.28	0.363	0.5144	11.86		318	77.8
319	56.8	24.874	20	53.58	40.24	0.3632	0.5146	11.79		319	78.4
320	57	24.842	20	53.53	40.19	0.3637	0.5152	11.74		320	78.3
321	57.4	24.794	20	53.41	40.1	0.3645	0.5159	11.61		321	78.8
322	57.6	24.758	20	53.39	40.07	0.3636	0.5143	11.61		322	79.3
323	58.3	24.677	20	53.23	39.93	0.3661	0.5172	11.45		323	79.7
324	58.9	24.595	20	53.14	39.82	0.3641	0.5138	11.38		324	80.4
325	59.8	24.479	20	53.12	39.74	0.356	0.5017	11.46		325	80.1
326	60.1	24.444	20	53	39.65	0.3565	0.502	11.32		326	80.7
327	60.7	24.362	20	52.92	39.56	0.3576	0.503	11.28		327	81.1
328	61.2	24.308	20	52.82	39.47	0.3577	0.5028	11.18		328	81.3
329	61.7	24.237	20	52.7	39.36	0.356	0.4997	11.08		329	81.8
330	62.1	24.192	20	52.6	39.28	0.3548	0.4976	10.98		330	82.1
331	62.7	24.117	20	52.54	39.19	0.3546	0.497	10.96		331	82.5
332	63.4	24.042	20	52.43	39.08	0.3547	0.4963	10.87		332	82.6
333	63.9	23.984	20	52.32	38.99	0.3529	0.4934	10.78		333	82.7
334	64.5	23.918	20	52.22	38.89	0.3525	0.4924	10.7		334	83.4
335	65	23.86	20	52.11	38.8	0.3523	0.4916	10.61		335	83.6
336	66	23.747	20	51.98	38.66	0.3584	0.4995	10.53		336	83.8
337	66.2	23.722	20	51.83	38.56	0.3585	0.499	10.35		337	83.7
338	66.6	23.683	20	51.73	38.48	0.3578	0.4976	10.26		338	84.2
339	67.3	23.609	20	51.61	38.37	0.3577	0.497	10.17		339	84.8
340	67.9	23.551	20	51.53	38.29	0.3577	0.4964	10.12		340	84.8
341	68.4	23.498	20	51.46	38.21	0.3566	0.4945	10.08		341	84.9
342	68.9	23.44	20	51.36	38.12	0.3562	0.4935	10		342	85.1
343	69.4	23.396	20	51.28	38.05	0.3558	0.4926	9.93		343	85.6
344	70.1	23.32	20	51.17	37.94	0.3554	0.4916	9.87		344	85.7
345	70.5	23.282	20	51.11	37.88	0.3549	0.4906	9.82		345	86.2
346	70.8	23.252	20	51.01	37.81	0.3551	0.4904	9.73		346	86.2
347	71.6	23.179	20	50.88	37.69	0.3582	0.4942	9.63		347	86.1
348	72.2	23.126	20	50.76	37.59	0.3567	0.4915	9.54		348	86.5
349	72.8	23.069	20	50.66	37.5	0.3566	0.4909	9.46		349	86.8
350	73.4	23.015	20	50.69	37.48	0.3506	0.4827	9.54		350	86.6
351	73.9	22.966	20	50.66	37.43	0.347	0.4773	9.55		351	86.9
352	74.1	22.951	20	50.6	37.39	0.3472	0.4772	9.48		352	87.6
353	74.7	22.893	20	50.53	37.31	0.3468	0.4762	9.45		353	87.7
354	75.1	22.856	20	50.4	37.22	0.3496	0.4798	9.33		354	87.9
355	75.5	22.826	20	50.35	37.17	0.3489	0.4783	9.3		355	88.2
356	76	22.777	20	50.28	37.1	0.3483	0.4773	9.26		356	87.8
357	76.8	22.709	20	50.23	37.03	0.348	0.4768	9.26		357	88.1
358	77.2	22.68	20	50.13	36.96	0.3497	0.4787	9.17		358	88.2
359	77.5	22.655	20	50.03	36.89	0.3502	0.4791	9.09		359	88.8
360	77.8	22.625	20	49.99	36.85	0.3499	0.4782	9.06		360	88.4
361	78.4	22.578	20	49.91	36.77	0.3497	0.4777	9.01		361	88.7
362	78.3	22.587	20	49.86	36.75	0.3493	0.4771	8.95		362	89.2
363	78.8	22.544	20	49.78	36.68	0.35	0.4777	8.9		363	88.8
364	79.3	22.507	20	49.74	36.63	0.3497	0.4771	8.89		364	89.3
365	79.7	22.471	20	49.69	36.58	0.3498	0.477	8.86		365	89.1
366	80.4	22.414	20	49.66	36.52	0.3484	0.4748	8.86		366	89.2
367	80.1	22.438	20	49.61	36.52	0.3468	0.4726	8.8		367	89.6
368	80.7	22.392	20	49.56	36.46	0.3467	0.4722	8.78		368	90
369	81.1	22.358	20	49.53	36.42	0.3466	0.4719	8.77		369	89.8
370	81.3	22.343	20	49.47	36.38	0.3476	0.473	8.73		370	89.9
371	81.8	22.308	20	49.4	36.32	0.3489	0.4744	8.68		371	90.3
372	82.1	22.285	20	49.33	36.27	0.3526	0.4791	8.63		372	89.9
373	82.5	22.253	20	49.28	36.21	0.3517	0.4777	8.59		373	90.8
374	82.6	22.249	20	49.24	36.19	0.3509	0.4764	8.56		374	90.9
375	82.7	22.24	20	49.16	36.14	0.3513	0.4766	8.49		375	90.5
376	83.4	22.189	20	49.15	36.1	0.3503	0.4752	8.51		376	90.1
377	83.6	22.172	20	49.11	36.07	0.3508	0.4757	8.49		377	90.5
378	83.8	22.16	20	49.06	36.03	0.3497	0.4741	8.44		378	91.5
379	83.7	22.164	20	49.02	36.02	0.3494	0.4735	8.41		379	91.2
380	84.2	22.129	20	48.98	35.97	0.3504	0.4747	8.39		380	91.2
381	84.8	22.087	20	48.96	35.93	0.3495	0.4735	8.4		381	90.9
382	84.8	22.083	20	48.93	35.91	0.3491	0.4728	8.37		382	90.9
383	84.9	22.079	20	48.87	35.88	0.3492	0.4728	8.32		383	91.4
384	85.1	22.062	20	48.85	35.85	0.3489	0.4722	8.31		384	91.2
385	85.6	22.029	20	48.82	35.82	0.3501	0.4734	8.31		385	91.7
386	85.7	22.017	20	48.8	35.8	0.349	0.4719	8.29		386	91.8
387	86.2	21.982	20	48.76	35.76	0.3481	0.4707	8.28		387	92
388	86.2	21.981	20	48.72	35.73	0.3481	0.4704	8.24		388	92.1
389	86.1	21.993	20	48.71	35.74	0.3484	0.4709	8.23		389	92.1
390	86.5	21.96	20	48.68	35.7	0.3491	0.4716	8.22		390	92.4
391	86.8	21.943	20	48.65	35.67	0.349	0.4712	8.2		391	92.5
392	86.6	21.954	20	48.62	35.66	0.3483	0.4706	8.17		392	92.3
393	86.9	21.939	20	48.58	35.63	0.3477	0.4696	8.14		393	92.1
394	87.6	21.888	20	48.55	35.58	0.3478	0.4696	8.15		394	92.6
395	87.7	21.884	20	48.54	35.57	0.3477	0.4693	8.14		395	92.1
396	87.9	21.865	20	48.52	35.55	0.3481	0.4697	8.14		396	92.8
397	88.2	21.845	20	48.5	35.52	0.3469	0.4682	8.13		397	92.6
398	87.8	21.873	20	48.57	35.58	0.341	0.4604	8.17		398	92.9
399	88.1	21.852	20	48.59	35.57	0.3368	0.4549	8.2		399	92.7
400	88.2	21.846	20	48.58	35.57	0.3369	0.4552	8.2		400	92.7
401	88.8	21.807	20	48.54	35.52	0.3376	0.4559	8.19		401	92.9
402	88.4	21.835	20	48.53	35.53	0.3386	0.4569	8.16		402	93.1
403	88.7	21.816	20	48.5	35.5	0.3402	0.4591	8.14		403	93
404	89.2	21.781	20	48.46	35.46	0.3406	0.4593	8.13		404	93.1
405	88.8	21.806	20	48.44	35.46	0.3422	0.4614	8.1		405	92.7
406	89.3	21.773	20	48.39	35.42	0.3387	0.4565	8.08		406	93.1
407	89.1	21.786	20	48.44	35.45	0.3374	0.4551	8.11		407	93.4
408	89.2	21.78	20	48.41	35.43	0.3367	0.454	8.08		408	93.3
409	89.6	21.755	20	48.38	35.4	0.3386	0.4565	8.08		409	93.5
410	90	21.73	20	48.31	35.34	0.3468	0.4669	8.03		410	93.8
411	89.8	21.74	20	48.23	35.31	0.3471	0.4671	7.96		411	93.8
412	89.9	21.734	20	48.26	35.32	0.3446	0.4642	7.98		412	93.5
413	90.3	21.705	20	48.26	35.3	0.3415	0.46	8		413	93.8
414	89.9	21.731	20	48.22	35.3	0.3417	0.4602	7.95		414	93.8
415	90.8	21.677	20	48.24	35.27	0.3413	0.4595	8		415	94.2
416	90.9	21.67	20	48.2	35.24	0.3416	0.46	7.97		416	93.9
417	90.5	21.694	20	48.19	35.26	0.3418	0.4602	7.95		417	93.7
418	90.1	21.719	20	48.16	35.25	0.3422	0.4604	7.9		418	94.3
419	90.5	21.696	20	48.16	35.24	0.342	0.4604	7.92		419	94.5
420	91.5	21.629	20	48.15	35.19	0.3418	0.4599	7.96		420	94.7
421	91.2	21.652	20	48.14	35.2	0.3415	0.4595	7.93		421	94.5
422	91.2	21.652	20	48.13	35.19	0.3416	0.4595	7.92		422	94.2
423	90.9	21.671	20	48.09	35.18	0.3418	0.4597	7.87		423	94.5
424	90.9	21.667	20	48.1	35.19	0.3411	0.4588	7.88		424	94.5
425	91.4	21.637	20	48.09	35.16	0.3414	0.4589	7.9		425	94.6
426	91.2	21.647	20	48.07	35.16	0.3414	0.4591	7.87		426	94.4
427	91.7	21.619	20	48.07	35.14	0.3418	0.4595	7.88		427	94.7
428	91.8	21.609	20	48.05	35.12	0.3414	0.4589	7.88		428	95
429	92	21.599	20	48.06	35.12	0.3412	0.4586	7.89		429	95.1
430	92.1	21.594	20	48.03	35.1	0.3412	0.4586	7.86		430	95.2
431	92.1	21.593	20	48.02	35.09	0.3421	0.4597	7.86		431	95.1
432	92.4	21.571	20	47.98	35.06	0.3452	0.4636	7.84		432	94.9
433	92.5	21.569	20	47.95	35.04	0.3447	0.463	7.81		433	95
434	92.3	21.578	20	48	35.07	0.3405	0.4577	7.85		434	95.3
435	92.1	21.594	20	48.01	35.09	0.3377	0.4538	7.85		435	95.2
436	92.6	21.564	20	48.01	35.07	0.3383	0.4546	7.87		436	95
437	92.1	21.594	20	47.99	35.08	0.3386	0.4551	7.84		437	95.1
438	92.8	21.551	20	47.99	35.05	0.3383	0.4545	7.86		438	95.3
439	92.6	21.563	20	47.98	35.05	0.3386	0.4548	7.85		439	95.5
440	92.9	21.544	20	47.98	35.04	0.3378	0.4538	7.86		440	95.4
441	92.7	21.554	20	47.97	35.04	0.3374	0.4535	7.84		441	95.3
442	92.7	21.555	20	47.97	35.04	0.3355	0.4509	7.84		442	95.6
443	92.9	21.543	20	47.98	35.04	0.3337	0.4485	7.85		443	96
444	93.1	21.531	20	47.99	35.03	0.3337	0.4486	7.87		444	95.9
445	93	21.537	20	47.94	35.01	0.3342	0.449	7.82		445	95.8
446	93.1	21.529	20	47.97	35.02	0.3352	0.4504	7.86		446	96
447	92.7	21.552	20	47.93	35.02	0.3346	0.4495	7.81		447	95.8
448	93.1	21.528	20	47.94	35.01	0.3345	0.4493	7.83		448	95.8
449	93.4	21.513	20	47.93	34.99	0.3345	0.4493	7.83		449	96
450	93.3	21.519	20	47.89	34.98	0.336	0.4512	7.8		450	96.2
451	93.5	21.505	20	47.91	34.97	0.3373	0.4529	7.81		451	96.5
452	93.8	21.486	20	47.87	34.94	0.3372	0.4527	7.79		452	96.2
453	93.8	21.489	20	47.87	34.94	0.337	0.4525	7.8		453	96.2
454	93.5	21.504	20	47.86	34.95	0.3371	0.4525	7.78		454	96
455	93.8	21.49	20	47.85	34.93	0.3369	0.4523	7.78		455	96
456	93.8	21.485	20	47.85	34.93	0.3371	0.4526	7.78		456	96
457	94.2	21.465	20	47.84	34.91	0.3373	0.4526	7.79		457	96
458	93.9	21.483	20	47.86	34.93	0.3367	0.452	7.79		458	96.5
459	93.7	21.496	20	47.84	34.93	0.3368	0.4522	7.76		459	96.2
460	94.3	21.454	20	47.78	34.87	0.34	0.4562	7.74		460	96.6
461	94.5	21.445	20	47.75	34.85	0.34	0.456	7.72		461	96.1
462	94.7	21.436	20	47.75	34.84	0.34	0.4561	7.72		462	96.2
463	94.5	21.446	20	47.72	34.83	0.3401	0.4561	7.69		463	96.2
464	94.2	21.462	20	47.73	34.85	0.3398	0.4556	7.69		464	96.3
465	94.5	21.443	20	47.73	34.83	0.3397	0.4555	7.7		465	96.5
466	94.5	21.444	20	47.69	34.82	0.3397	0.4554	7.67		466	96.5
467	94.6	21.439	20	47.7	34.82	0.3397	0.4554	7.68		467	96.2
468	94.4	21.449	20	47.68	34.81	0.3397	0.4552	7.66		468	96.2
469	94.7	21.434	20	47.68	34.8	0.34	0.4554	7.66		469	95.8
470	95	21.417	20	47.67	34.79	0.3396	0.4551	7.67		470	96.8
471	95.1	21.41	20	47.67	34.78	0.3397	0.455	7.67		471	96.5
472	95.2	21.404	20	47.69	34.79	0.3395	0.4547	7.69		472	96.6
473	95.1	21.412	20	47.65	34.77	0.3396	0.4547	7.65		473	96.3
474	94.9	21.42	20	47.66	34.78	0.3395	0.4546	7.66		474	96.3
475	95	21.413	20	47.65	34.77	0.3396	0.4547	7.65		475	97
476	95.3	21.399	20	47.65	34.76	0.3394	0.4545	7.66		476	96.4
477	95.2	21.405	20	47.63	34.76	0.3394	0.4541	7.64		477	96.5
478	95	21.413	20	47.61	34.75	0.3393	0.4542	7.62		478	96.7
479	95.1	21.408	20	47.64	34.76	0.3393	0.4541	7.64		479	96.8
480	95.3	21.395	20	47.61	34.74	0.3395	0.4544	7.63		480	96.9
481	95.5	21.384	20	47.63	34.75	0.3392	0.4542	7.66		481	97
482	95.4	21.39	20	47.6	34.73	0.3392	0.4539	7.63		482	96.8
483	95.3	21.397	20	47.58	34.73	0.3392	0.4538	7.61		483	97.3
484	95.6	21.379	20	47.62	34.73	0.3391	0.4538	7.65		484	96.8
485	96	21.357	20	47.59	34.7	0.3391	0.4537	7.64		485	97.2
486	95.9	21.363	20	47.6	34.71	0.339	0.4537	7.64		486	96.7
487	95.8	21.369	20	47.59	34.71	0.339	0.4536	7.63		487	96.6
488	96	21.355	20	47.58	34.69	0.339	0.4535	7.63		488	96.6
489	95.8	21.37	20	47.58	34.71	0.3389	0.4535	7.62		489	96.8
490	95.8	21.365	20	47.56	34.69	0.3393	0.4539	7.61		490	97.3
491	96	21.358	20	47.59	34.7	0.339	0.4536	7.63		491	96.8
492	96.2	21.342	20	47.56	34.68	0.3388	0.4533	7.62		492	96.6
493	96.5	21.329	20	47.57	34.67	0.339	0.4533	7.64		493	97.6
494	96.2	21.345	20	47.57	34.68	0.3389	0.4533	7.62		494	97.5
495	96.2	21.343	20	47.54	34.66	0.3389	0.4532	7.6		495	97.4
496	96	21.354	20	47.54	34.68	0.3387	0.453	7.6		496	97.6
497	96	21.358	20	47.53	34.67	0.3388	0.4532	7.59		497	97.4
498	96	21.354	20	47.55	34.68	0.3389	0.4534	7.6		498	97.2
499	96	21.354	20	47.54	34.67	0.3398	0.4545	7.59		499	97.4
500	96.5	21.328	20	47.52	34.65	0.3411	0.4563	7.6		500	0
501	96.2	21.347	20	47.54	34.67	0.3409	0.4562	7.6		501	0
502	96.6	21.323	20	47.52	34.64	0.341	0.4563	7.6		502	0
503	96.1	21.349	20	47.53	34.67	0.3409	0.4562	7.59		503	0
504	96.2	21.345	20	47.52	34.66	0.3409	0.4562	7.58		504	0
505	96.2	21.345	20	47.51	34.65	0.3408	0.456	7.58		505	0
506	96.3	21.341	20	47.54	34.66	0.3408	0.4559	7.6		506	0
507	96.5	21.328	20	47.47	34.62	0.3403	0.4552	7.55		507	0
508	96.5	21.33	20	47.47	34.62	0.34	0.4548	7.55		508	0
509	96.2	21.343	20	47.46	34.62	0.34	0.4548	7.53		509	0
510	96.2	21.345	20	47.45	34.62	0.34	0.455	7.53		510	0
511	95.8	21.366	20	47.45	34.64	0.34	0.4548	7.52		511	0
512	96.8	21.312	20	47.45	34.6	0.3401	0.4547	7.55		512	0
513	96.5	21.328	20	47.46	34.61	0.34	0.4546	7.55		513	0
514	96.6	21.32	20	47.44	34.6	0.34	0.4543	7.53		514	0
515	96.3	21.341	20	47.44	34.61	0.3398	0.4542	7.52		515	0
516	96.3	21.337	20	47.42	34.6	0.3397	0.4544	7.51		516	0
517	97	21.297	20	47.43	34.58	0.3399	0.4545	7.54		517	0
518	96.4	21.334	20	47.43	34.6	0.3398	0.4543	7.52		518	0
519	96.5	21.325	20	47.41	34.58	0.3398	0.4544	7.5		519	0
520	96.7	21.317	20	47.44	34.59	0.3397	0.4544	7.53		520	0
521	96.8	21.309	20	47.41	34.57	0.3395	0.4543	7.52		521	0
522	96.9	21.303	20	47.41	34.57	0.3397	0.4542	7.52		522	0
523	97	21.297	20	47.42	34.57	0.3397	0.4542	7.53		523	0
524	96.8	21.311	20	47.4	34.57	0.3397	0.4542	7.51		524	0
525	97.3	21.28	20	47.44	34.57	0.3396	0.4541	7.56		525	0
526	96.8	21.308	20	47.4	34.57	0.3397	0.4542	7.51		526	0
527	97.2	21.287	20	47.4	34.56	0.3397	0.4541	7.53		527	0
528	96.7	21.314	20	47.41	34.57	0.3396	0.4541	7.51		528	0
529	96.6	21.322	20	47.4	34.58	0.3397	0.4538	7.5		529	0
530	96.6	21.322	20	47.4	34.58	0.3397	0.4538	7.5		530	0
531	96.8	21.308	20	47.39	34.56	0.3396	0.4536	7.5		531	0
532	97.3	21.284	20	47.38	34.54	0.3395	0.4535	7.51		532	0
533	96.8	21.31	20	47.37	34.55	0.3395	0.4535	7.48		533	0
534	96.6	21.32	20	47.38	34.56	0.3395	0.4534	7.48		534	0
535	97.6	21.262	20	47.36	34.52	0.3393	0.4534	7.51		535	0
536	97.5	21.268	20	47.38	34.53	0.3394	0.4534	7.52		536	0
537	97.4	21.278	20	47.37	34.53	0.3395	0.4539	7.51		537	0
538	97.6	21.266	20	47.36	34.52	0.3394	0.4539	7.5		538	0
539	97.4	21.275	20	47.38	34.53	0.3393	0.4536	7.51		539	0
540	97.2	21.287	20	47.35	34.53	0.3393	0.4533	7.48		540	0
541	97.4	21.275	20	47.37	34.53	0.3392	0.4532	7.5		541	0

## Sheet: N2-high-2.4-fwd
Colibri Photonics GmbH Ibidi-OPAL	Dezimaltrennzeichen: Komma				spot:	B	gasflow:	high	pumppress:	50 kPa
2016-02-17	1899-12-31 18:47:17				frequency:	2.4 Hz	dir:	fwd	pumpvac:	-50 kPa
tau100 = 21,130 Âµs @ 20 Â°C	tau0 = 59,000 Âµs @ 20 Â°C	f = 0,75			pumpgas:	N2
T-Korr von tau100 = -0,0272 Âµs / Â°C	T-Korr von tau0 = -0,0203 Âµs / Â°C
Freq 1 = 11,993 kHz	Freq 2 = 6,323 kHz
Zeit / s	O2-Gehalt / %-Luft	tau / Âµs	T / Â°C	Phase1 / Â° @ 11,993 kHz	Phase2 / Â° @ 6,323 kHz	Amplitude1 / V p-p	Amplitude2 / V p-p	Signal : Untergrund		t korrigiert	O2 korrigiert
1	82.5	22.252	20	49.28	36.21	0.3507	0.4763	8.6		1	100.9
2	82.5	22.256	20	49.27	36.21	0.3508	0.4765	8.59		2	100.6
3	82.1	22.285	20	49.27	36.23	0.3508	0.4764	8.57		3	100.7
4	82.3	22.271	20	49.3	36.24	0.3507	0.4766	8.6		4	100.6
5	82	22.292	20	49.3	36.25	0.3511	0.4771	8.59		5	100.7
6	82.4	22.259	20	49.32	36.24	0.3508	0.4767	8.64		6	100.2
7	82.4	22.259	20	49.35	36.26	0.351	0.4769	8.66		7	100.4
8	82.1	22.286	20	49.35	36.27	0.351	0.477	8.64		8	100.6
9	81.8	22.311	20	49.34	36.29	0.3514	0.4775	8.61		9	100.5
10	82.1	22.287	20	49.36	36.28	0.3509	0.477	8.65		10	100.5
11	81.7	22.312	20	49.36	36.3	0.351	0.4772	8.64		11	100.6
12	82.1	22.281	20	49.37	36.28	0.3512	0.4774	8.67		12	100.7
13	81.8	22.307	20	49.39	36.31	0.3512	0.4773	8.67		13	100.7
14	81.7	22.315	20	49.39	36.31	0.3511	0.4773	8.66		14	100.3
15	81.6	22.319	20	49.38	36.31	0.3512	0.4772	8.65		15	100.3
16	81.7	22.315	20	49.41	36.32	0.3514	0.4777	8.68		16	100.4
17	81.6	22.319	20	49.39	36.32	0.3513	0.4776	8.66		17	100.2
18	81.4	22.337	20	49.42	36.35	0.3513	0.4777	8.67		18	100.5
19	81.1	22.359	20	49.41	36.36	0.3513	0.4778	8.65		19	100.5
20	81.7	22.317	20	49.41	36.33	0.3512	0.4778	8.69		20	100.2
21	81.7	22.315	20	49.43	36.34	0.3514	0.4779	8.7		21	100.4
22	81.7	22.318	20	49.42	36.34	0.3515	0.4779	8.7		22	100.6
23	81.4	22.336	20	49.44	36.36	0.3515	0.4781	8.7		23	99.9
24	81.4	22.341	20	49.45	36.36	0.3514	0.4779	8.7		24	99.7
25	81.2	22.355	20	49.45	36.38	0.3514	0.478	8.7		25	98.9
26	81.1	22.36	20	49.44	36.38	0.3514	0.4782	8.69		26	98.9
27	81	22.37	20	49.4	36.36	0.3517	0.4783	8.64		27	98.2
28	81.2	22.351	20	49.43	36.36	0.3522	0.479	8.68		28	97.3
29	81.2	22.354	20	49.47	36.38	0.3515	0.4782	8.71		29	96.5
30	81.4	22.337	20	49.43	36.35	0.3517	0.4785	8.69		30	95.9
31	81.2	22.357	20	49.49	36.4	0.352	0.479	8.74		31	95.2
32	80.8	22.383	20	49.49	36.41	0.3521	0.4791	8.71		32	94.3
33	80.7	22.39	20	49.52	36.44	0.352	0.479	8.74		33	93.6
34	80.6	22.403	20	49.51	36.44	0.3519	0.4789	8.73		34	92.9
35	80.8	22.382	20	49.51	36.43	0.3519	0.4788	8.74		35	91.9
36	80.9	22.378	20	49.54	36.44	0.3518	0.4789	8.77		36	91.3
37	80.4	22.413	20	49.51	36.45	0.3524	0.4797	8.72		37	89.7
38	80.6	22.402	20	49.57	36.47	0.3516	0.4787	8.78		38	88.5
39	80.8	22.381	20	49.57	36.46	0.3495	0.4758	8.8		39	88
40	80.8	22.386	20	49.58	36.47	0.3489	0.4749	8.81		40	87.3
41	80.5	22.412	20	49.57	36.48	0.3488	0.4751	8.78		41	86.2
42	80.7	22.396	20	49.56	36.46	0.349	0.4749	8.78		42	85.7
43	80.4	22.414	20	49.56	36.47	0.3495	0.4759	8.77		43	84.8
44	80.5	22.407	20	49.54	36.46	0.3503	0.477	8.75		44	83.8
45	80.5	22.407	20	49.59	36.49	0.3481	0.4741	8.8		45	83.2
46	80.4	22.413	20	49.58	36.48	0.3465	0.4717	8.78		46	82.7
47	81.1	22.364	20	49.59	36.45	0.3458	0.4711	8.83		47	81.9
48	80.7	22.391	20	49.59	36.48	0.3476	0.4734	8.81		48	81.2
49	80.5	22.406	20	49.57	36.47	0.3472	0.4727	8.78		49	80.7
50	80.9	22.38	20	49.6	36.47	0.346	0.4711	8.83		50	79.8
51	80.6	22.401	20	49.57	36.47	0.3462	0.4714	8.79		51	79.1
52	80.5	22.409	20	49.57	36.48	0.3462	0.4714	8.78		52	78.9
53	80.9	22.377	20	49.6	36.47	0.3458	0.4709	8.83		53	78
54	80.6	22.4	20	49.56	36.46	0.3458	0.4709	8.78		54	77.5
55	80.7	22.391	20	49.59	36.47	0.3458	0.471	8.81		55	76.9
56	80.6	22.398	20	49.57	36.47	0.3457	0.4709	8.79		56	76.2
57	80.7	22.389	20	49.59	36.47	0.3462	0.4717	8.81		57	76
58	80.2	22.43	20	49.57	36.49	0.3465	0.472	8.77		58	75.8
59	80.4	22.416	20	49.57	36.48	0.3465	0.472	8.77		59	74.9
60	80.6	22.401	20	49.6	36.49	0.3466	0.4721	8.82		60	74.3
61	80.5	22.409	20	49.58	36.48	0.3466	0.472	8.78		61	74.1
62	80.5	22.406	20	49.61	36.49	0.3464	0.472	8.82		62	73.6
63	80.6	22.401	20	49.6	36.48	0.3465	0.4718	8.81		63	73.2
64	80.7	22.393	20	49.58	36.47	0.3464	0.4718	8.8		64	72.8
65	80.7	22.39	20	49.61	36.48	0.3465	0.472	8.83		65	72.3
66	80.3	22.426	20	49.58	36.49	0.348	0.474	8.77		66	71.9
67	80.3	22.423	20	49.59	36.5	0.3474	0.4731	8.79		67	71.5
68	80.4	22.418	20	49.59	36.49	0.3485	0.4745	8.79		68	71.1
69	80.2	22.428	20	49.57	36.49	0.3487	0.4748	8.77		69	70.6
70	80.5	22.406	20	49.57	36.47	0.3497	0.4764	8.78		70	70.3
71	80.5	22.409	20	49.56	36.47	0.3507	0.4777	8.77		71	70
72	80.2	22.429	20	49.58	36.5	0.3527	0.4804	8.78		72	69.8
73	80.4	22.418	20	49.61	36.5	0.353	0.4809	8.81		73	69.4
74	80.6	22.401	20	49.66	36.52	0.3493	0.4759	8.87		74	69.1
75	79.9	22.453	20	49.68	36.57	0.3493	0.4762	8.86		75	68.6
76	79.7	22.474	20	49.71	36.6	0.3497	0.4766	8.88		76	68.2
77	78.9	22.536	20	49.78	36.67	0.35	0.4776	8.9		77	68.1
78	78.9	22.537	20	49.84	36.71	0.352	0.4805	8.97		78	68
79	78.2	22.596	20	49.92	36.79	0.3503	0.4787	9.01		79	67.7
80	77.3	22.665	20	50.01	36.89	0.3509	0.4797	9.06		80	67.3
81	76.5	22.732	20	50.1	36.98	0.3511	0.4806	9.1		81	66.9
82	75.9	22.785	20	50.22	37.07	0.3523	0.4826	9.19		82	66.8
83	75.2	22.85	20	50.31	37.17	0.3541	0.4856	9.24		83	66.5
84	74.3	22.926	20	50.47	37.3	0.3524	0.4838	9.36		84	66.2
85	73.6	22.992	20	50.52	37.37	0.3521	0.484	9.36		85	66.1
86	72.9	23.056	20	50.65	37.49	0.3527	0.4853	9.47		86	65.8
87	71.9	23.151	20	50.77	37.61	0.3533	0.4871	9.53		87	65.6
88	71.3	23.208	20	50.91	37.73	0.3557	0.491	9.65		88	65.4
89	69.7	23.365	20	51.2	37.98	0.3543	0.4901	9.86		89	65
90	68.5	23.481	20	51.33	38.13	0.3555	0.4924	9.92		90	64.9
91	68	23.54	20	51.44	38.23	0.3571	0.4955	10.01		91	64.8
92	67.3	23.612	20	51.57	38.35	0.3564	0.4949	10.12		92	64.6
93	66.2	23.729	20	51.74	38.51	0.3561	0.4956	10.23		93	64.5
94	65.7	23.786	20	51.85	38.61	0.3566	0.4968	10.33		94	64.3
95	64.8	23.884	20	52.01	38.76	0.3581	0.4995	10.46		95	64.3
96	63.8	23.995	20	52.11	38.89	0.3595	0.502	10.49		96	64.2
97	63.2	24.064	20	52.24	39	0.3594	0.5027	10.6		97	64.1
98	62.7	24.121	20	52.41	39.13	0.3601	0.5041	10.78		98	64
99	61.9	24.211	20	52.51	39.24	0.36	0.5045	10.84		99	63.8
100	61.2	24.3	20	52.66	39.38	0.3604	0.506	10.96		100	63.5
101	60.7	24.362	20	52.79	39.49	0.3614	0.508	11.09		101	63.5
102	59.8	24.481	20	52.89	39.62	0.3615	0.5087	11.13		102	63.1
103	59.1	24.563	20	53.03	39.75	0.3616	0.5097	11.25		103	63
104	58.9	24.598	20	53.14	39.83	0.362	0.5107	11.38		104	62.7
105	58	24.705	20	53.27	39.97	0.3625	0.5121	11.48		105	62.5
106	57.5	24.78	20	53.37	40.07	0.3628	0.5131	11.56		106	62.4
107	56.9	24.853	20	53.49	40.18	0.3641	0.5157	11.66		107	62.1
108	56.2	24.951	20	53.6	40.3	0.3641	0.5161	11.75		108	62.1
109	56	24.982	20	53.7	40.37	0.364	0.5167	11.86		109	62
110	55.8	25.017	20	53.85	40.48	0.3644	0.5178	12.07		110	61.7
111	54.9	25.144	20	53.9	40.59	0.3655	0.5197	12.03		111	61.9
112	54.3	25.232	20	54	40.69	0.3661	0.5211	12.1		112	61.7
113	54.1	25.257	20	54.1	40.76	0.3668	0.5227	12.23		113	61.3
114	53.6	25.326	20	54.19	40.86	0.3667	0.5232	12.32		114	61.3
115	53.2	25.394	20	54.3	40.96	0.3671	0.5243	12.43		115	61.1
116	52.8	25.46	20	54.37	41.03	0.3672	0.5249	12.48		116	61.1
117	52.3	25.536	20	54.46	41.13	0.3676	0.526	12.56		117	61
118	51.9	25.592	20	54.57	41.22	0.3679	0.5266	12.68		118	60.6
119	51.5	25.659	20	54.65	41.31	0.3674	0.5265	12.75		119	60.6
120	51.1	25.721	20	54.73	41.39	0.3677	0.5277	12.82		120	60.5
121	50.6	25.807	20	54.8	41.48	0.3684	0.529	12.86		121	60.2
122	50.3	25.846	20	54.92	41.57	0.3691	0.5305	13.03		122	60
123	50	25.895	20	54.98	41.63	0.3692	0.5311	13.08		123	60
124	49.8	25.932	20	55.06	41.7	0.3691	0.531	13.19		124	60
125	49.4	26.006	20	55.1	41.77	0.3694	0.5321	13.19		125	59.7
126	49.1	26.052	20	55.2	41.85	0.3701	0.5335	13.32		126	59.8
127	48.6	26.133	20	55.27	41.94	0.3706	0.5348	13.37		127	59.5
128	48.2	26.215	20	55.33	42.02	0.3705	0.5348	13.38		128	59.4
129	48.1	26.228	20	55.41	42.07	0.3702	0.535	13.52		129	59.2
130	48	26.251	20	55.48	42.12	0.3707	0.536	13.62		130	59.1
131	47.7	26.303	20	55.55	42.19	0.3712	0.5369	13.7		131	59.1
132	47.3	26.372	20	55.6	42.26	0.3715	0.538	13.72		132	58.9
133	46.9	26.436	20	55.64	42.32	0.3719	0.5389	13.72		133	58.9
134	46.8	26.459	20	55.74	42.39	0.3716	0.5389	13.89		134	58.7
135	46.5	26.517	20	55.8	42.46	0.3712	0.5385	13.94		135	58.8
136	46.2	26.566	20	55.84	42.51	0.3714	0.5391	13.97		136	58.5
137	46.1	26.598	20	55.9	42.56	0.3718	0.5402	14.06		137	58.5
138	45.8	26.645	20	55.96	42.63	0.3717	0.5403	14.13		138	58.4
139	45.6	26.691	20	56.03	42.69	0.3726	0.542	14.21		139	58.2
140	45.4	26.717	20	56.06	42.72	0.3722	0.542	14.24		140	58.2
141	45	26.812	20	56.12	42.81	0.3733	0.5434	14.26		141	58
142	44.9	26.82	20	56.18	42.85	0.3729	0.5433	14.37		142	58
143	44.8	26.841	20	56.22	42.88	0.373	0.5437	14.42		143	57.9
144	44.6	26.883	20	56.3	42.95	0.3728	0.5436	14.54		144	57.7
145	44.5	26.898	20	56.27	42.94	0.3749	0.5468	14.46		145	57.7
146	44.3	26.933	20	56.28	42.97	0.3747	0.5467	14.45		146	57.6
147	44.3	26.941	20	56.32	43	0.3744	0.5466	14.5		147	57.5
148	44.2	26.967	20	56.34	43.02	0.3746	0.5469	14.52		148	57.5
149	44.1	26.987	20	56.39	43.06	0.3745	0.547	14.61		149	57.3
150	44	27.004	20	56.4	43.08	0.3748	0.5475	14.6		150	57.4
151	43.8	27.035	20	56.4	43.1	0.3746	0.5475	14.56		151	57.2
152	43.5	27.1	20	56.49	43.19	0.3764	0.5504	14.69		152	57.2
153	43.5	27.111	20	56.53	43.21	0.3767	0.5511	14.75		153	57.1
154	43.1	27.181	20	56.56	43.27	0.3768	0.5518	14.73		154	56.9
155	43	27.199	20	56.63	43.32	0.3767	0.5522	14.86		155	57
156	42.7	27.27	20	56.73	43.42	0.3732	0.547	15		156	56.8
157	42.5	27.305	20	56.83	43.49	0.3722	0.546	15.17		157	56.8
158	42.4	27.335	20	56.87	43.53	0.3721	0.5461	15.23		158	56.6
159	42.1	27.386	20	56.91	43.58	0.3721	0.5464	15.25		159	56.6
160	42.1	27.392	20	56.91	43.59	0.3763	0.5526	15.24		160	56.5
161	42	27.423	20	56.92	43.61	0.3772	0.5541	15.23		161	56.5
162	41.7	27.477	20	56.94	43.65	0.3771	0.5542	15.21		162	56.5
163	41.9	27.45	20	56.99	43.66	0.3773	0.5545	15.35		163	56.2
164	41.7	27.491	20	57.02	43.71	0.3759	0.553	15.37		164	56.3
165	41.3	27.564	20	57.06	43.77	0.376	0.553	15.38		165	56.3
166	41.3	27.566	20	57.09	43.79	0.376	0.5534	15.44		166	56.2
167	41.1	27.617	20	57.13	43.84	0.3768	0.555	15.47		167	56.1
168	41.1	27.612	20	57.17	43.86	0.3764	0.5543	15.57		168	56.1
169	41	27.645	20	57.22	43.9	0.3768	0.5552	15.62		169	56.1
170	40.6	27.723	20	57.24	43.96	0.3764	0.5549	15.58		170	55.9
171	40.6	27.736	20	57.27	43.98	0.3768	0.5557	15.63		171	55.8
172	40.5	27.738	20	57.34	44.02	0.3767	0.5558	15.8		172	55.8
173	40.2	27.811	20	57.34	44.07	0.3773	0.5569	15.69		173	55.9
174	40	27.857	20	57.38	44.12	0.3769	0.5565	15.73		174	55.6
175	40	27.874	20	57.41	44.14	0.3769	0.5568	15.79		175	55.7
176	40	27.873	20	57.45	44.17	0.3773	0.5575	15.89		176	55.7
177	39.7	27.93	20	57.47	44.21	0.3778	0.5584	15.87		177	55.6
178	39.8	27.917	20	57.51	44.22	0.3775	0.5584	15.97		178	55.6
179	39.5	27.977	20	57.57	44.29	0.3774	0.5583	16.03		179	55.5
180	39.4	27.999	20	57.59	44.31	0.3775	0.5588	16.05		180	55.3
181	39.2	28.04	20	57.62	44.35	0.3775	0.5589	16.07		181	55.4
182	39.1	28.081	20	57.65	44.39	0.3776	0.5593	16.1		182	55.4
183	39.1	28.069	20	57.68	44.4	0.3779	0.5599	16.18		183	55.3
184	38.9	28.131	20	57.71	44.45	0.3782	0.5605	16.17		184	55.3
185	38.9	28.123	20	57.73	44.46	0.3783	0.5608	16.23		185	55.2
186	38.7	28.161	20	57.77	44.51	0.3781	0.5606	16.29		186	55.1
187	38.8	28.151	20	57.82	44.53	0.378	0.5607	16.42		187	55
188	38.5	28.208	20	57.81	44.56	0.3782	0.5612	16.33		188	55
189	38.5	28.219	20	57.87	44.59	0.3783	0.5616	16.46		189	55
190	38.4	28.253	20	57.88	44.62	0.3783	0.5618	16.43		190	54.9
191	38.2	28.302	20	57.9	44.66	0.3785	0.5623	16.41		191	54.9
192	38.2	28.293	20	57.92	44.66	0.3787	0.5626	16.48		192	54.8
193	38	28.338	20	57.95	44.7	0.3786	0.5625	16.49		193	54.8
194	38	28.344	20	58.01	44.74	0.3786	0.5631	16.64		194	54.7
195	37.9	28.369	20	58	44.75	0.3789	0.5633	16.6		195	54.7
196	37.7	28.414	20	58.05	44.8	0.3788	0.5635	16.64		196	54.7
197	37.7	28.423	20	58.05	44.81	0.3788	0.5637	16.64		197	54.6
198	37.6	28.443	20	58.09	44.84	0.3792	0.5644	16.72		198	54.6
199	37.5	28.467	20	58.12	44.87	0.379	0.5644	16.75		199	54.6
200	37.5	28.471	20	58.15	44.89	0.3791	0.5644	16.84		200	54.6
201	37.3	28.51	20	58.17	44.92	0.3791	0.5646	16.83		201	54.4
202	37.4	28.505	20	58.19	44.93	0.3792	0.5649	16.9		202	54.3
203	37.2	28.534	20	58.21	44.96	0.3793	0.5652	16.9		203	54.3
204	37.2	28.544	20	58.24	44.98	0.3796	0.5656	16.96		204	54.2
205	37.1	28.571	20	58.26	45.01	0.3795	0.5656	16.97		205	54.3
206	36.9	28.613	20	58.29	45.05	0.3794	0.5658	17		206	54.3
207	37	28.585	20	58.29	45.03	0.3799	0.5666	17.04		207	54.4
208	36.8	28.65	20	58.33	45.09	0.3795	0.5661	17.05		208	54.4
209	36.8	28.657	20	58.34	45.1	0.38	0.5671	17.07		209	54.5
210	36.6	28.7	20	58.36	45.14	0.3799	0.5672	17.07		210	54.4
211	36.6	28.695	20	58.39	45.15	0.3797	0.567	17.17		211	54.4
212	36.5	28.729	20	58.38	45.17	0.3799	0.5674	17.09		212	54.5
213	36.5	28.727	20	58.41	45.18	0.3799	0.5677	17.17		213	54.5
214	36.5	28.729	20	58.44	45.2	0.3799	0.5678	17.24		214	54.4
215	36.2	28.796	20	58.46	45.25	0.3799	0.5678	17.2		215	54.5
216	36.3	28.781	20	58.47	45.24	0.38	0.568	17.25		216	54.2
217	36.3	28.789	20	58.49	45.26	0.38	0.5679	17.31		217	54.3
218	36.2	28.805	20	58.5	45.27	0.3805	0.5685	17.31		218	54.2
219	36.1	28.829	20	58.51	45.29	0.3805	0.5689	17.3		219	54.1
220	36.1	28.826	20	58.53	45.3	0.3802	0.5684	17.36		220	54.2
221	36.1	28.832	20	58.54	45.31	0.3802	0.5689	17.37		221	54
222	35.9	28.88	20	58.59	45.36	0.3803	0.5688	17.43		222	53.9
223	35.8	28.906	20	58.57	45.37	0.3804	0.569	17.34		223	53.8
224	35.8	28.904	20	58.61	45.39	0.3806	0.5695	17.46		224	53.7
225	35.9	28.891	20	58.62	45.38	0.3805	0.5695	17.49		225	53.8
226	35.6	28.955	20	58.62	45.42	0.3804	0.5695	17.4		226	53.5
227	35.7	28.931	20	58.65	45.43	0.3804	0.5696	17.54		227	53.6
228	35.7	28.93	20	58.66	45.43	0.3805	0.5698	17.56		228	53.5
229	35.6	28.96	20	58.68	45.46	0.3805	0.5698	17.58		229	53.3
230	35.6	28.97	20	58.68	45.47	0.3805	0.5699	17.57		230	53.4
231	35.5	29.001	20	58.7	45.49	0.3807	0.5703	17.56		231	53.3
232	35.3	29.032	20	58.7	45.51	0.3807	0.5705	17.54		232	53.3
233	35.4	29.013	20	58.72	45.51	0.3807	0.5705	17.61		233	53
234	35.4	29.024	20	58.75	45.53	0.3806	0.5707	17.68		234	53.1
235	35.3	29.044	20	58.74	45.54	0.3808	0.5707	17.62		235	52.9
236	35.3	29.054	20	58.78	45.57	0.3808	0.5711	17.73		236	52.9
237	35.2	29.073	20	58.78	45.58	0.3808	0.571	17.69		237	52.8
238	35.1	29.095	20	58.8	45.6	0.3809	0.5713	17.72		238	52.8
239	35	29.129	20	58.8	45.62	0.3808	0.5714	17.67		239	52.7
240	35	29.13	20	58.82	45.63	0.381	0.5716	17.72		240	52.7
241	35	29.119	20	58.85	45.64	0.3808	0.5716	17.82		241	52.6
242	34.9	29.16	20	58.84	45.66	0.3809	0.5718	17.73		242	52.6
243	34.9	29.168	20	58.86	45.67	0.3811	0.5721	17.77		243	52.6
244	34.8	29.182	20	58.9	45.7	0.3811	0.5722	17.86		244	52.5
245	34.8	29.188	20	58.89	45.7	0.3811	0.5722	17.83		245	52.5
246	34.7	29.221	20	58.92	45.74	0.381	0.5723	17.88		246	52.4
247	34.7	29.204	20	58.93	45.73	0.3811	0.5725	17.92		247	52.5
248	34.7	29.222	20	58.93	45.74	0.3813	0.5728	17.9		248	52.7
249	34.6	29.239	20	58.95	45.76	0.3813	0.5729	17.93		249	52.8
250	34.6	29.252	20	58.95	45.77	0.3813	0.573	17.91		250	53.1
251	34.6	29.244	20	58.98	45.79	0.3812	0.5731	18.02		251	53.3
252	34.6	29.247	20	58.98	45.79	0.3814	0.5734	18.02		252	53.7
253	34.4	29.302	20	59	45.83	0.3814	0.5735	17.99		253	54.1
254	34.3	29.318	20	59.03	45.85	0.3815	0.5736	18.03		254	54.5
255	34.3	29.314	20	59.02	45.84	0.3816	0.5737	18.02		255	55.1
256	34.2	29.349	20	59.05	45.88	0.3815	0.5738	18.07		256	55.5
257	34.3	29.329	20	59.05	45.87	0.3823	0.575	18.07		257	56.1
258	34.3	29.322	20	59.01	45.84	0.389	0.585	17.97		258	56.7
259	34.4	29.286	20	58.99	45.82	0.3892	0.5854	17.99		259	57.3
260	34.4	29.301	20	59.03	45.84	0.3916	0.5887	18.08		260	58.2
261	34.5	29.28	20	59.05	45.84	0.3912	0.5885	18.15		261	58.7
262	34.4	29.299	20	59	45.83	0.3914	0.5884	18		262	59.3
263	34.4	29.294	20	58.99	45.82	0.3904	0.5869	17.97		263	60.1
264	34.5	29.262	20	58.95	45.78	0.3893	0.585	17.89		264	60.6
265	34.5	29.263	20	59.09	45.85	0.3798	0.571	18.31		265	61.3
266	34.4	29.306	20	59.13	45.9	0.3785	0.5692	18.35		266	61.9
267	34.5	29.272	20	59.15	45.89	0.3786	0.5695	18.46		267	62.8
268	34.2	29.343	20	59.16	45.94	0.381	0.5731	18.41		268	63.4
269	34.3	29.328	20	59.13	45.91	0.3856	0.5804	18.32		269	64.1
270	34.2	29.351	20	59.14	45.93	0.3853	0.5799	18.32		270	64.6
271	34.1	29.387	20	59.15	45.96	0.3853	0.5801	18.3		271	65.4
272	34.2	29.362	20	59.2	45.97	0.3849	0.5794	18.5		272	65.9
273	34	29.422	20	59.26	46.04	0.3809	0.5735	18.58		273	66.6
274	33.9	29.432	20	59.28	46.05	0.3809	0.5737	18.61		274	67.2
275	33.8	29.465	20	59.33	46.09	0.381	0.574	18.71		275	67.8
276	33.7	29.497	20	59.3	46.1	0.3838	0.5784	18.57		276	68.3
277	33.8	29.482	20	59.28	46.08	0.3864	0.5823	18.53		277	68.9
278	33.5	29.556	20	59.33	46.15	0.3816	0.5757	18.59		278	69.4
279	33.6	29.519	20	59.38	46.16	0.379	0.5714	18.8		279	70
280	33.5	29.561	20	59.4	46.19	0.3829	0.5774	18.78		280	70.4
281	33.3	29.605	20	59.42	46.22	0.3825	0.577	18.78		281	71.1
282	33.4	29.593	20	59.46	46.24	0.3821	0.5765	18.92		282	71.7
283	33.3	29.63	20	59.46	46.26	0.3825	0.5776	18.87		283	71.9
284	33.3	29.627	20	59.49	46.27	0.3858	0.5825	18.96		284	72.7
285	33	29.699	20	59.48	46.31	0.3888	0.587	18.8		285	73
286	33.1	29.686	20	59.55	46.34	0.3844	0.5808	19.04		286	73.5
287	32.9	29.722	20	59.57	46.37	0.3813	0.5761	19.07		287	74
288	32.9	29.73	20	59.59	46.39	0.3814	0.5764	19.11		288	74.4
289	32.8	29.772	20	59.62	46.43	0.3815	0.5766	19.15		289	74.7
290	32.8	29.763	20	59.61	46.42	0.3849	0.5819	19.13		290	75.1
291	32.7	29.803	20	59.59	46.43	0.3891	0.5883	19		291	75.6
292	32.7	29.807	20	59.58	46.43	0.3886	0.5879	18.97		292	75.9
293	32.6	29.818	20	59.61	46.44	0.3886	0.5879	19.02		293	76.8
294	32.6	29.839	20	59.63	46.47	0.3887	0.5881	19.06		294	76.9
295	32.6	29.824	20	59.65	46.47	0.3893	0.5888	19.16		295	77.3
296	32.5	29.867	20	59.68	46.51	0.3884	0.588	19.19		296	77.6
297	32.5	29.865	20	59.67	46.5	0.3878	0.5871	19.15		297	77.8
298	32.4	29.88	20	59.66	46.51	0.3879	0.5871	19.09		298	78.2
299	32.5	29.859	20	59.65	46.49	0.388	0.5873	19.09		299	78.5
300	32.7	29.803	20	59.6	46.43	0.3886	0.5876	19.02		300	78.7
301	32.8	29.777	20	59.56	46.4	0.3885	0.5874	18.95		301	78.7
302	33.1	29.666	20	59.5	46.3	0.3885	0.5868	18.93		302	79
303	33.3	29.607	20	59.41	46.22	0.3882	0.5856	18.73		303	79.3
304	33.7	29.487	20	59.31	46.1	0.3879	0.5846	18.61		304	79.9
305	34.1	29.38	20	59.19	45.97	0.3875	0.5833	18.43		305	80.2
306	34.5	29.265	20	59.07	45.84	0.3872	0.5819	18.25		306	80.1
307	35.1	29.097	20	58.92	45.67	0.3868	0.5805	18.05		307	80.3
308	35.5	28.984	20	58.77	45.52	0.3862	0.5786	17.78		308	80.5
309	36.1	28.836	20	58.62	45.35	0.3859	0.5772	17.58		309	80.8
310	36.7	28.662	20	58.45	45.16	0.3853	0.5751	17.37		310	81.2
311	37.3	28.516	20	58.28	44.99	0.3847	0.5732	17.13		311	81.2
312	38.2	28.296	20	58.11	44.76	0.3843	0.5715	16.97		312	81.3
313	38.7	28.172	20	57.95	44.61	0.3836	0.5695	16.73		313	81.3
314	39.3	28.033	20	57.74	44.41	0.3831	0.5675	16.38		314	82.2
315	40.1	27.852	20	57.59	44.22	0.3825	0.5653	16.25		315	82
316	40.6	27.717	20	57.39	44.04	0.3818	0.5634	15.95		316	82.2
317	41.3	27.563	20	57.21	43.85	0.3814	0.5614	15.73		317	82.6
318	41.9	27.43	20	57.05	43.69	0.3808	0.5597	15.53		318	82.7
319	42.8	27.25	20	56.86	43.48	0.3803	0.5576	15.32		319	82.8
320	43.4	27.134	20	56.73	43.33	0.3794	0.5556	15.16		320	83
321	44.1	26.985	20	56.55	43.15	0.3791	0.554	14.96		321	83
322	44.6	26.881	20	56.39	43	0.3786	0.5522	14.74		322	83.3
323	45.4	26.734	20	56.25	42.83	0.378	0.5507	14.62		323	83.4
324	45.9	26.637	20	56.06	42.67	0.3776	0.549	14.33		324	83.7
325	46.6	26.501	20	55.94	42.52	0.377	0.5473	14.25		325	83.8
326	47.2	26.387	20	55.79	42.37	0.3764	0.5457	14.08		326	83.9
327	47.8	26.285	20	55.65	42.24	0.3762	0.5445	13.92		327	84
328	48.3	26.185	20	55.53	42.11	0.3758	0.543	13.79		328	84.2
329	48.9	26.081	20	55.38	41.97	0.3751	0.5415	13.63		329	84.4
330	49.4	26.006	20	55.27	41.86	0.3747	0.5401	13.49		330	84.5
331	50	25.906	20	55.13	41.72	0.3742	0.5386	13.35		331	84.3
332	50.4	25.828	20	55.01	41.61	0.3738	0.5373	13.21		332	84.5
333	51.1	25.715	20	54.91	41.48	0.3734	0.5361	13.15		333	84.8
334	51.7	25.621	20	54.79	41.36	0.373	0.535	13.04		334	85
335	51.9	25.59	20	54.72	41.3	0.3726	0.5339	12.94		335	84.9
336	52.7	25.465	20	54.59	41.16	0.3722	0.5327	12.86		336	85.2
337	53	25.418	20	54.5	41.08	0.3719	0.5315	12.75		337	85.4
338	53.5	25.349	20	54.39	40.98	0.3715	0.5307	12.63		338	85.4
339	54	25.28	20	54.3	40.88	0.3712	0.5294	12.54		339	85.8
340	54.4	25.219	20	54.22	40.8	0.3709	0.5288	12.48		340	85.7
341	54.7	25.165	20	54.11	40.71	0.3705	0.5276	12.35		341	85.7
342	55.1	25.106	20	54.05	40.64	0.37	0.5265	12.31		342	85.7
343	55.6	25.041	20	53.96	40.55	0.37	0.5259	12.23		343	85.9
344	55.9	25.003	20	53.89	40.49	0.3697	0.5251	12.15		344	86
345	56.8	24.877	20	53.74	40.33	0.3691	0.5235	12.04		345	86.2
346	56.9	24.859	20	53.68	40.29	0.3687	0.5227	11.96		346	86.4
347	57.3	24.807	20	53.61	40.21	0.3686	0.5222	11.89		347	86.3
348	57.6	24.766	20	53.55	40.16	0.3683	0.5212	11.85		348	86.5
349	57.8	24.731	20	53.49	40.1	0.3682	0.5209	11.78		349	86.6
350	58.2	24.687	20	53.41	40.03	0.3679	0.5201	11.71		350	86.5
351	58.5	24.642	20	53.38	39.99	0.3675	0.5195	11.71		351	87
352	58.7	24.619	20	53.3	39.92	0.3676	0.519	11.6		352	86.8
353	58.7	24.612	20	53.26	39.9	0.3671	0.5181	11.55		353	86.9
354	59	24.574	20	53.2	39.84	0.3671	0.5177	11.49		354	87.2
355	59.3	24.541	20	53.14	39.79	0.3666	0.5169	11.44		355	87
356	59.9	24.467	20	53.12	39.73	0.3664	0.5164	11.47		356	87.1
357	60.2	24.428	20	53.05	39.67	0.3666	0.516	11.41		357	87.4
358	60.1	24.442	20	53.02	39.66	0.3662	0.5157	11.35		358	87.3
359	60.3	24.411	20	52.96	39.61	0.3663	0.5154	11.29		359	87.8
360	60.5	24.384	20	52.91	39.57	0.3658	0.5147	11.24		360	87.7
361	60.8	24.35	20	52.89	39.53	0.3657	0.5142	11.24		361	87.8
362	61.2	24.301	20	52.84	39.47	0.3656	0.5137	11.22		362	87.9
363	61.2	24.301	20	52.8	39.45	0.3656	0.5134	11.16		363	87.8
364	61.3	24.289	20	52.75	39.42	0.3655	0.513	11.11		364	88.2
365	61.3	24.284	20	52.72	39.4	0.365	0.5124	11.07		365	88.1
366	62.2	24.184	20	52.7	39.33	0.365	0.5121	11.13		366	88.4
367	62	24.207	20	52.64	39.31	0.3649	0.5117	11.02		367	88.2
368	62.2	24.175	20	52.64	39.29	0.3648	0.5114	11.05		368	88.4
369	62.6	24.132	20	52.58	39.23	0.3646	0.511	11.01		369	88.6
370	62.7	24.124	20	52.57	39.22	0.3643	0.5106	11		370	88.6
371	62.8	24.11	20	52.53	39.19	0.3644	0.5104	10.96		371	88.5
372	63	24.086	20	52.5	39.15	0.3644	0.5103	10.93		372	88.9
373	63	24.081	20	52.46	39.13	0.3641	0.5098	10.89		373	88.9
374	63.3	24.05	20	52.43	39.09	0.3639	0.5093	10.86		374	89.2
375	63.4	24.037	20	52.41	39.07	0.3637	0.509	10.85		375	89.4
376	63.7	24.001	20	52.38	39.03	0.3637	0.5086	10.84		376	89
377	63.8	23.995	20	52.37	39.02	0.3636	0.5084	10.83		377	89.2
378	63.9	23.986	20	52.32	38.99	0.3634	0.5079	10.78		378	89.4
379	64	23.967	20	52.29	38.96	0.363	0.5075	10.75		379	89.5
380	64.2	23.953	20	52.28	38.95	0.3629	0.5072	10.75		380	89.5
381	64.4	23.923	20	52.24	38.91	0.3628	0.5068	10.72		381	89.6
382	64.5	23.914	20	52.24	38.9	0.3627	0.5066	10.72		382	89.9
383	64.3	23.936	20	52.19	38.89	0.3628	0.5064	10.65		383	89.7
384	64.5	23.912	20	52.16	38.86	0.3625	0.506	10.63		384	89.8
385	64.8	23.884	20	52.16	38.84	0.3626	0.506	10.65		385	89.8
386	65	23.864	20	52.11	38.8	0.3628	0.5061	10.6		386	89.7
387	64.9	23.864	20	52.09	38.79	0.3647	0.5089	10.57		387	90
388	65.2	23.837	20	52.09	38.77	0.3621	0.505	10.59		388	90.1
389	65.4	23.811	20	52.07	38.75	0.3604	0.5026	10.6		389	90.3
390	65.4	23.816	20	52.03	38.73	0.3585	0.4998	10.54		390	90
391	65.8	23.77	20	51.98	38.67	0.3575	0.4983	10.51		391	90.4
392	65.7	23.776	20	52	38.68	0.3575	0.4983	10.52		392	90.2
393	65.7	23.778	20	52.04	38.71	0.3537	0.4929	10.58		393	90.3
394	65.7	23.778	20	52.03	38.7	0.3535	0.4925	10.57		394	90.5
395	65.9	23.761	20	52.01	38.68	0.3534	0.4922	10.56		395	90.5
396	66	23.745	20	51.96	38.64	0.3551	0.4943	10.51		396	90.4
397	66.2	23.728	20	51.97	38.64	0.3556	0.4956	10.53		397	90.6
398	66.4	23.709	20	51.97	38.62	0.3542	0.4932	10.55		398	90.8
399	66.3	23.718	20	51.94	38.61	0.3539	0.4929	10.5		399	90.7
400	66.5	23.698	20	51.92	38.59	0.3539	0.4926	10.49		400	90.9
401	66.6	23.679	20	51.9	38.57	0.3545	0.4933	10.49		401	90.9
402	66.5	23.69	20	51.85	38.55	0.3571	0.4969	10.41		402	91
403	67	23.643	20	51.86	38.52	0.3561	0.4954	10.46		403	90.8
404	66.8	23.66	20	51.84	38.52	0.3561	0.4956	10.42		404	91.1
405	66.9	23.647	20	51.81	38.5	0.356	0.4952	10.4		405	91.1
406	67.2	23.619	20	51.79	38.47	0.3572	0.4964	10.39		406	91.3
407	67	23.641	20	51.77	38.47	0.3564	0.4955	10.35		407	91
408	67.1	23.628	20	51.75	38.46	0.3561	0.4951	10.34		408	91.3
409	67.4	23.603	20	51.75	38.44	0.3561	0.4948	10.36		409	91.2
410	67.3	23.609	20	51.71	38.42	0.3564	0.4951	10.3		410	91.4
411	67.8	23.554	20	51.69	38.37	0.3557	0.494	10.32		411	91.6
412	67.7	23.566	20	51.68	38.38	0.3556	0.4937	10.3		412	91.1
413	67.8	23.56	20	51.66	38.36	0.3556	0.4938	10.27		413	91.4
414	67.9	23.546	20	51.64	38.34	0.3558	0.494	10.27		414	91.5
415	67.8	23.555	20	51.64	38.35	0.3553	0.493	10.26		415	91.5
416	68.2	23.516	20	51.62	38.31	0.3551	0.4928	10.27		416	91.7
417	68.1	23.527	20	51.6	38.3	0.3557	0.4935	10.22		417	91.8
418	68.4	23.493	20	51.6	38.28	0.3554	0.4931	10.25		418	91.8
419	68.2	23.514	20	51.58	38.29	0.3544	0.4917	10.21		419	91.8
420	68.4	23.492	20	51.57	38.27	0.3539	0.491	10.22		420	91.8
421	68.6	23.477	20	51.54	38.24	0.3543	0.4914	10.2		421	91.9
422	68.6	23.47	20	51.54	38.24	0.3546	0.4918	10.2		422	91.8
423	68.5	23.49	20	51.51	38.23	0.3547	0.492	10.14		423	91.6
424	68.9	23.447	20	51.51	38.21	0.3548	0.4922	10.18		424	91.9
425	68.9	23.445	20	51.5	38.2	0.3551	0.4923	10.16		425	92.1
426	69.2	23.416	20	51.48	38.17	0.3553	0.4925	10.16		426	92.2
427	69.4	23.398	20	51.47	38.15	0.3573	0.4952	10.17		427	92.2
428	69	23.43	20	51.45	38.16	0.3575	0.4953	10.12		428	92.4
429	69.2	23.409	20	51.44	38.14	0.3575	0.4953	10.12		429	92
430	69.4	23.398	20	51.44	38.13	0.3571	0.4948	10.13		430	92.3
431	69.5	23.384	20	51.36	38.09	0.3562	0.4932	10.05		431	92.1
432	69.5	23.388	20	51.35	38.08	0.3565	0.4938	10.03		432	92.4
433	69.6	23.375	20	51.34	38.06	0.3545	0.491	10.02		433	92.5
434	69.9	23.347	20	51.34	38.05	0.3537	0.4898	10.05		434	92.3
435	69.7	23.368	20	51.32	38.05	0.3537	0.4897	10.01		435	92.3
436	69.8	23.355	20	51.29	38.03	0.3539	0.49	9.99		436	92.6
437	69.8	23.354	20	51.29	38.03	0.3535	0.4893	9.99		437	92.6
438	69.7	23.364	20	51.26	38.02	0.3536	0.4894	9.94		438	92.5
439	70	23.332	20	51.28	38.01	0.3536	0.4893	9.99		439	92.4
440	70.1	23.325	20	51.27	37.99	0.3535	0.4892	9.98		440	92.4
441	70.3	23.303	20	51.23	37.96	0.3536	0.4891	9.96		441	92.6
442	70	23.334	20	51.23	37.98	0.3538	0.4893	9.93		442	92.6
443	70.4	23.295	20	51.22	37.95	0.3543	0.49	9.94		443	92.6
444	70.2	23.311	20	51.22	37.96	0.3531	0.4884	9.93		444	92.6
445	70.3	23.305	20	51.2	37.94	0.3531	0.4883	9.91		445	92.4
446	70.5	23.285	20	51.2	37.93	0.3531	0.4882	9.93		446	92.7
447	70.5	23.289	20	51.19	37.93	0.3532	0.4885	9.91		447	92.8
448	70.4	23.29	20	51.17	37.92	0.3532	0.4884	9.88		448	92.7
449	70.6	23.276	20	51.16	37.91	0.3531	0.4883	9.89		449	92.9
450	70.8	23.26	20	51.15	37.89	0.3533	0.4884	9.89		450	92.8
451	70.7	23.264	20	51.14	37.89	0.353	0.4881	9.87		451	92.8
452	70.9	23.246	20	51.15	37.88	0.3529	0.4876	9.89		452	92.8
453	70.9	23.245	20	51.12	37.86	0.3532	0.4881	9.86		453	93.1
454	71	23.241	20	51.12	37.86	0.3536	0.4885	9.87		454	93
455	70.8	23.251	20	51.1	37.86	0.3527	0.4872	9.84		455	93.1
456	71.1	23.224	20	51.1	37.84	0.3527	0.4872	9.86		456	92.9
457	71.1	23.224	20	51.08	37.83	0.3527	0.4872	9.84		457	93.1
458	71.3	23.211	20	51.07	37.81	0.3525	0.487	9.83		458	93.4
459	71	23.237	20	51.08	37.84	0.3529	0.4876	9.83		459	93.1
460	71.3	23.203	20	51.07	37.81	0.3525	0.4869	9.84		460	93.3
461	71.2	23.214	20	51.06	37.81	0.3526	0.487	9.81		461	93.2
462	71.4	23.202	20	51.05	37.8	0.3526	0.4868	9.82		462	93
463	71.6	23.18	20	51.04	37.78	0.3523	0.4865	9.83		463	93
464	71.1	23.223	20	51.03	37.8	0.3525	0.4869	9.78		464	92.9
465	71.4	23.195	20	51	37.77	0.3531	0.4872	9.77		465	93.3
466	71.5	23.187	20	51.02	37.77	0.353	0.4871	9.79
467	71.5	23.184	20	51.01	37.76	0.3529	0.487	9.78
468	71.7	23.174	20	51	37.75	0.3528	0.487	9.78
469	71.8	23.161	20	51	37.74	0.3528	0.4868	9.78
470	71.8	23.156	20	50.99	37.73	0.3527	0.4868	9.78
471	71.8	23.164	20	50.98	37.74	0.3528	0.4869	9.77
472	71.8	23.161	20	50.96	37.72	0.3526	0.4867	9.75
473	71.9	23.147	20	50.97	37.72	0.3526	0.4866	9.77
474	71.8	23.158	20	50.97	37.72	0.3526	0.4865	9.75
475	71.6	23.175	20	50.97	37.73	0.3526	0.4864	9.74
476	71.9	23.148	20	50.93	37.7	0.3526	0.4862	9.71
477	72.1	23.136	20	50.95	37.7	0.3525	0.4862	9.75
478	72.2	23.122	20	50.92	37.68	0.3524	0.486	9.73
479	72.2	23.122	20	50.92	37.67	0.3523	0.4859	9.73
480	72.4	23.104	20	50.94	37.68	0.3524	0.4862	9.77
481	72	23.136	20	50.9	37.67	0.3524	0.4859	9.69
482	72.3	23.115	20	50.92	37.67	0.3524	0.486	9.73
483	72.1	23.129	20	50.89	37.66	0.3523	0.4859	9.69
484	72.4	23.101	20	50.89	37.64	0.3524	0.4859	9.71
485	72.5	23.092	20	50.91	37.65	0.3523	0.4857	9.73
486	72.3	23.109	20	50.88	37.64	0.3522	0.4856	9.68
487	72.3	23.114	20	50.87	37.64	0.3522	0.4856	9.67
488	72.6	23.086	20	50.85	37.62	0.3522	0.4857	9.68
489	72.6	23.086	20	50.87	37.62	0.3522	0.4856	9.69
490	72.5	23.094	20	50.87	37.63	0.3521	0.4856	9.68
491	72.4	23.105	20	50.84	37.62	0.3521	0.4853	9.64
492	72.4	23.1	20	50.86	37.63	0.3521	0.4855	9.67
493	72.6	23.082	20	50.83	37.6	0.352	0.4852	9.65
494	72.6	23.089	20	50.84	37.61	0.352	0.4853	9.66
495	72.6	23.087	20	50.82	37.6	0.352	0.4851	9.64
496	72.6	23.082	20	50.8	37.58	0.352	0.485	9.62
497	72.4	23.103	20	50.82	37.61	0.352	0.4851	9.62
498	72.7	23.072	20	50.79	37.57	0.3521	0.485	9.61
499	72.8	23.069	20	50.82	37.58	0.3519	0.485	9.65
500	72.7	23.074	20	50.8	37.58	0.3519	0.4848	9.62
501	72.9	23.059	20	50.79	37.57	0.3519	0.4848	9.63
502	72.8	23.068	20	50.8	37.58	0.3518	0.4847	9.63
503	72.8	23.067	20	50.77	37.56	0.3519	0.4846	9.59
504	72.8	23.07	20	50.79	37.57	0.3517	0.4848	9.62
505	73.1	23.042	20	50.77	37.54	0.3518	0.4846	9.61
506	73	23.046	20	50.78	37.55	0.3518	0.4847	9.62
507	73.1	23.038	20	50.78	37.55	0.3518	0.4845	9.63
508	72.9	23.054	20	50.75	37.54	0.3517	0.4846	9.58
509	73.1	23.036	20	50.77	37.54	0.3516	0.4845	9.62
510	73.4	23.008	20	50.76	37.51	0.3517	0.4845	9.63
511	73.1	23.036	20	50.75	37.53	0.3517	0.4844	9.59
512	73.3	23.02	20	50.73	37.51	0.3517	0.4843	9.59
513	73.2	23.026	20	50.74	37.51	0.3516	0.4843	9.59
514	73	23.044	20	50.74	37.52	0.3516	0.4843	9.57
515	73	23.045	20	50.73	37.52	0.3516	0.4842	9.56
516	72.9	23.061	20	50.72	37.52	0.3516	0.4843	9.54
517	73.3	23.024	20	50.71	37.5	0.3515	0.484	9.56
518	73.3	23.023	20	50.71	37.5	0.3516	0.4841	9.56
519	73.3	23.023	20	50.71	37.49	0.3516	0.4841	9.55

## Sheet: N2-high-1.2-fwd
Colibri Photonics GmbH Ibidi-OPAL	Dezimaltrennzeichen: Komma				spot:	B	gasflow:	high	pumppress:	50 kPa
2016-02-17	1899-12-31 18:56:40				frequency:	1.2 Hz	dir:	fwd	pumpvac:	-50 kPa
tau100 = 21,130 Âµs @ 20 Â°C	tau0 = 59,000 Âµs @ 20 Â°C	f = 0,75			pumpgas:	N2
T-Korr von tau100 = -0,0272 Âµs / Â°C	T-Korr von tau0 = -0,0203 Âµs / Â°C
Freq 1 = 11,993 kHz	Freq 2 = 6,323 kHz
Zeit / s	O2-Gehalt / %-Luft	tau / Âµs	T / Â°C	Phase1 / Â° @ 11,993 kHz	Phase2 / Â° @ 6,323 kHz	Amplitude1 / V p-p	Amplitude2 / V p-p	Signal : Untergrund
1	74.4	22.916	20	50.51	37.32	0.3553	0.4885	9.41
2	73.8	22.975	20	50.6	37.41	0.3522	0.4843	9.47
3	74.2	22.937	20	50.61	37.39	0.3508	0.4826	9.51
4	74.2	22.941	20	50.61	37.39	0.3501	0.4816	9.5
5	74.3	22.929	20	50.61	37.38	0.3493	0.4805	9.52
6	74.2	22.936	20	50.58	37.37	0.3493	0.4802	9.48
7	74.2	22.938	20	50.62	37.39	0.3503	0.4817	9.53
8	74.1	22.947	20	50.61	37.39	0.3522	0.4844	9.5
9	74.1	22.947	20	50.59	37.38	0.3529	0.4854	9.48
10	74.4	22.922	20	50.61	37.37	0.3502	0.4815	9.52
11	74.5	22.913	20	50.6	37.37	0.3496	0.4807	9.52
12	74.2	22.942	20	50.57	37.37	0.349	0.4798	9.47
13	74.2	22.938	20	50.62	37.39	0.3483	0.4791	9.52
14	74.4	22.918	20	50.6	37.37	0.3486	0.4793	9.51
15	74.3	22.93	20	50.6	37.37	0.3491	0.4799	9.5
16	74.3	22.929	20	50.61	37.38	0.3508	0.4822	9.51
17	74.4	22.919	20	50.59	37.36	0.3527	0.4848	9.5
18	74.3	22.928	20	50.59	37.37	0.3521	0.484	9.5
19	74.5	22.915	20	50.58	37.35	0.351	0.4826	9.49
20	74.2	22.936	20	50.59	37.37	0.351	0.4827	9.48
21	74.9	22.879	20	50.59	37.34	0.3506	0.4817	9.53
22	74.6	22.902	20	50.59	37.35	0.3523	0.4843	9.52
23	74.4	22.921	20	50.59	37.37	0.3511	0.4826	9.5
24	74.5	22.912	20	50.54	37.33	0.351	0.4827	9.45
25	74.4	22.919	20	50.53	37.33	0.3518	0.4834	9.44
26	74.8	22.886	20	50.59	37.34	0.3506	0.4819	9.52
27	74.8	22.885	20	50.53	37.31	0.352	0.4834	9.46
28	74.5	22.915	20	50.57	37.35	0.3503	0.4816	9.49
29	75.1	22.858	20	50.58	37.32	0.3502	0.4814	9.53
30	74.5	22.911	20	50.53	37.32	0.3512	0.4826	9.44
31	74.9	22.876	20	50.5	37.29	0.3541	0.4866	9.44
32	74.9	22.876	20	50.53	37.3	0.3515	0.483	9.47
33	75.1	22.854	20	50.54	37.29	0.3504	0.4814	9.5
34	75.2	22.849	20	50.53	37.28	0.3503	0.4814	9.48
35	74.8	22.88	20	50.49	37.29	0.351	0.4823	9.42
36	75	22.87	20	50.5	37.28	0.3509	0.4819	9.44
37	74.8	22.88	20	50.53	37.3	0.351	0.4823	9.46
38	75.1	22.859	20	50.51	37.28	0.3527	0.4845	9.46
39	75	22.869	20	50.51	37.29	0.3538	0.4859	9.45
40	75.2	22.847	20	50.46	37.25	0.3539	0.4859	9.41
41	74.8	22.881	20	50.47	37.27	0.3541	0.4862	9.4
42	75	22.87	20	50.49	37.28	0.3535	0.4855	9.43
43	74.9	22.874	20	50.5	37.28	0.354	0.4861	9.43
44	75.1	22.86	20	50.47	37.26	0.354	0.4862	9.41
45	75	22.865	20	50.46	37.26	0.3533	0.4852	9.4
46	75	22.865	20	50.47	37.26	0.3533	0.4851	9.4
47	75	22.864	20	50.48	37.27	0.3531	0.4849	9.42
48	74.9	22.874	20	50.49	37.28	0.3529	0.4847	9.42
49	75.3	22.836	20	50.48	37.25	0.3528	0.4844	9.44
50	75.1	22.861	20	50.47	37.26	0.3528	0.4845	9.41
51	74.9	22.874	20	50.45	37.26	0.3543	0.4864	9.38
52	74.8	22.881	20	50.49	37.28	0.3531	0.4849	9.41
53	75	22.871	20	50.48	37.27	0.3524	0.484	9.42
54	74.9	22.874	20	50.5	37.28	0.3519	0.4833	9.43
55	75.3	22.843	20	50.5	37.27	0.351	0.4822	9.46
56	75.1	22.857	20	50.49	37.27	0.3513	0.4825	9.43
57	75.2	22.846	20	50.53	37.28	0.3505	0.4816	9.49
58	75	22.869	20	50.53	37.3	0.3496	0.4802	9.47
59	75	22.863	20	50.51	37.28	0.3499	0.4807	9.45
60	75.3	22.845	20	50.51	37.27	0.3487	0.479	9.47
61	75.1	22.86	20	50.51	37.28	0.3477	0.4778	9.45
62	74.7	22.89	20	50.51	37.3	0.35	0.4809	9.43
63	74.9	22.876	20	50.41	37.24	0.3563	0.4893	9.34
64	75.3	22.844	20	50.46	37.25	0.3517	0.4828	9.42
65	75.1	22.854	20	50.42	37.23	0.3505	0.4813	9.36
66	75.2	22.847	20	50.44	37.23	0.3517	0.4828	9.38
67	75.2	22.85	20	50.44	37.24	0.3506	0.4812	9.38
68	75.5	22.822	20	50.43	37.21	0.3496	0.48	9.39
69	75.3	22.838	20	50.45	37.23	0.3521	0.4834	9.4
70	75.3	22.843	20	50.45	37.24	0.3511	0.4819	9.4
71	75	22.864	20	50.49	37.27	0.3492	0.4797	9.43
72	74.7	22.895	20	50.54	37.32	0.3479	0.4781	9.46
73	74.1	22.943	20	50.57	37.37	0.3476	0.4779	9.46
74	74.3	22.933	20	50.66	37.41	0.348	0.4789	9.57
75	73.6	22.99	20	50.7	37.47	0.3534	0.4863	9.58
76	73.3	23.019	20	50.74	37.51	0.3551	0.4889	9.6
77	72.7	23.079	20	50.81	37.59	0.3531	0.4866	9.63
78	72.3	23.11	20	50.91	37.66	0.3537	0.4878	9.72
79	71.9	23.153	20	50.96	37.72	0.3538	0.4882	9.75
80	71.1	23.225	20	51.05	37.81	0.3545	0.4898	9.8
81	70.3	23.309	20	51.2	37.95	0.3547	0.4907	9.91
82	69.7	23.366	20	51.33	38.05	0.3558	0.4926	10.02
83	68.9	23.444	20	51.43	38.16	0.3556	0.493	10.08
84	68.2	23.516	20	51.54	38.27	0.3569	0.4951	10.16
85	67.4	23.603	20	51.69	38.4	0.3576	0.497	10.27
86	66.6	23.681	20	51.81	38.52	0.3591	0.4995	10.37
87	66	23.752	20	51.9	38.62	0.359	0.5001	10.42
88	65.1	23.849	20	52.01	38.74	0.3599	0.5021	10.48
89	64.8	23.884	20	52.17	38.84	0.3602	0.5028	10.66
90	63.8	23.991	20	52.22	38.94	0.3644	0.5092	10.63
91	63.4	24.042	20	52.35	39.04	0.3654	0.5113	10.76
92	62.6	24.135	20	52.41	39.14	0.3658	0.5123	10.76
93	62.1	24.195	20	52.53	39.24	0.3652	0.5119	10.88
94	61.5	24.261	20	52.64	39.34	0.3657	0.5133	10.98
95	61.2	24.302	20	52.77	39.44	0.3659	0.5142	11.12
96	60.1	24.443	20	52.85	39.57	0.3673	0.5168	11.11
97	59.7	24.489	20	53	39.68	0.3696	0.5205	11.28
98	59.2	24.554	20	53.09	39.77	0.3676	0.5182	11.35
99	58.7	24.622	20	53.21	39.88	0.3671	0.5181	11.46
100	57.9	24.717	20	53.39	40.04	0.3636	0.514	11.65
101	57.2	24.814	20	53.48	40.15	0.364	0.5151	11.69
102	56.8	24.871	20	53.6	40.25	0.3645	0.5165	11.81
103	56.5	24.92	20	53.7	40.34	0.365	0.5174	11.93
104	55.8	25.014	20	53.82	40.46	0.3652	0.5185	12.02
105	55.2	25.098	20	53.91	40.56	0.366	0.5203	12.1
106	54.5	25.198	20	54.11	40.73	0.3646	0.519	12.31
107	54.2	25.241	20	54.18	40.79	0.3678	0.524	12.38
108	53.9	25.288	20	54.23	40.85	0.3686	0.5253	12.42
109	53.4	25.363	20	54.31	40.94	0.3691	0.527	12.48
110	53	25.42	20	54.44	41.05	0.3696	0.528	12.63
111	52.7	25.474	20	54.55	41.14	0.3642	0.5208	12.77
112	52.2	25.543	20	54.59	41.21	0.3659	0.5236	12.78
113	52	25.584	20	54.65	41.26	0.3659	0.524	12.84
114	51.5	25.66	20	54.75	41.37	0.3664	0.5255	12.94
115	50.9	25.748	20	54.86	41.48	0.3666	0.5262	13.03
116	50.6	25.798	20	54.96	41.56	0.3683	0.5292	13.15
117	50.2	25.862	20	54.95	41.6	0.3707	0.533	13.06
118	50.1	25.885	20	55.04	41.66	0.3689	0.5306	13.22
119	49.7	25.956	20	55.18	41.78	0.3678	0.5295	13.39
120	49.3	26.017	20	55.25	41.86	0.3695	0.5325	13.45
121	48.9	26.09	20	55.37	41.97	0.368	0.5309	13.6
122	48.6	26.142	20	55.42	42.02	0.3691	0.5329	13.63
123	48.2	26.211	20	55.48	42.1	0.369	0.5332	13.66
124	47.8	26.283	20	55.56	42.18	0.3731	0.5394	13.74
125	47.5	26.338	20	55.61	42.25	0.3726	0.5395	13.78
126	47.1	26.416	20	55.72	42.35	0.3713	0.5379	13.9
127	46.9	26.443	20	55.84	42.43	0.3695	0.5358	14.11
128	46.6	26.506	20	55.87	42.49	0.3706	0.5378	14.11
129	46.2	26.571	20	56	42.6	0.3704	0.538	14.29
130	45.8	26.643	20	56.09	42.69	0.3712	0.5395	14.4
131	45.2	26.757	20	56.17	42.81	0.3736	0.5438	14.42
132	44.9	26.824	20	56.22	42.87	0.3751	0.5465	14.44
133	44.7	26.871	20	56.27	42.93	0.3747	0.5464	14.49
134	44.3	26.933	20	56.41	43.04	0.3718	0.5426	14.72
135	44.1	26.982	20	56.46	43.1	0.3727	0.5443	14.75
136	44.1	26.975	20	56.5	43.11	0.3738	0.5459	14.85
137	43.8	27.037	20	56.57	43.19	0.3725	0.5445	14.93
138	43.5	27.107	20	56.63	43.26	0.3724	0.5446	14.98
139	43.2	27.158	20	56.71	43.34	0.3723	0.5448	15.1
140	42.9	27.219	20	56.77	43.41	0.3737	0.5473	15.15
141	42.8	27.25	20	56.79	43.44	0.3761	0.5512	15.15
142	42.7	27.277	20	56.78	43.44	0.3767	0.5523	15.09
143	42.4	27.334	20	56.91	43.55	0.374	0.5487	15.32
144	42.2	27.37	20	56.94	43.59	0.3747	0.5501	15.35
145	42	27.418	20	57.05	43.68	0.3735	0.5488	15.54
146	41.8	27.451	20	57.09	43.72	0.3738	0.5495	15.57
147	41.6	27.512	20	57.13	43.78	0.3739	0.5499	15.59
148	41.4	27.55	20	57.15	43.81	0.3768	0.5544	15.59
149	41	27.626	20	57.22	43.89	0.3786	0.5576	15.66
150	40.9	27.67	20	57.25	43.93	0.3794	0.5588	15.67
151	40.8	27.676	20	57.26	43.95	0.3793	0.5591	15.69
152	40.7	27.699	20	57.33	43.99	0.3761	0.5544	15.82
153	40.5	27.74	20	57.39	44.05	0.3757	0.5543	15.91
154	40.4	27.762	20	57.47	44.1	0.3748	0.5533	16.07
155	40.2	27.824	20	57.51	44.16	0.3749	0.5536	16.09
156	40.1	27.843	20	57.55	44.2	0.3758	0.5552	16.17
157	39.9	27.881	20	57.61	44.25	0.3777	0.5583	16.26
158	39.8	27.914	20	57.56	44.24	0.3809	0.563	16.09
159	39.5	27.969	20	57.57	44.29	0.381	0.5636	16.05
160	39.5	27.989	20	57.6	44.31	0.381	0.5638	16.1
161	39.3	28.029	20	57.64	44.36	0.3813	0.5644	16.13
162	39.3	28.037	20	57.69	44.39	0.3813	0.5648	16.25
163	39.1	28.08	20	57.74	44.44	0.3813	0.565	16.32
164	38.8	28.148	20	57.76	44.49	0.3814	0.5652	16.28
165	38.8	28.155	20	57.79	44.51	0.3812	0.5651	16.35
166	38.7	28.17	20	57.88	44.57	0.3782	0.561	16.56
167	38.6	28.192	20	57.95	44.62	0.3763	0.5584	16.69
168	38.6	28.184	20	57.93	44.61	0.3791	0.5626	16.67
169	38.6	28.189	20	57.94	44.61	0.377	0.5595	16.68
170	38.7	28.178	20	57.95	44.61	0.3763	0.5584	16.72
171	38.5	28.222	20	57.94	44.63	0.3764	0.5583	16.63
172	38.5	28.227	20	57.89	44.61	0.3796	0.5633	16.51
173	38.4	28.24	20	57.99	44.67	0.3769	0.5596	16.74
174	38.3	28.269	20	58.04	44.71	0.3781	0.5614	16.82
175	38.2	28.291	20	58.03	44.72	0.3789	0.5629	16.77
176	38.1	28.308	20	58.03	44.73	0.3794	0.5637	16.75
177	38	28.344	20	58.05	44.76	0.3795	0.5641	16.75
178	38	28.347	20	58.09	44.79	0.3792	0.5637	16.86
179	37.9	28.374	20	58.11	44.81	0.3801	0.5651	16.87
180	37.7	28.408	20	58.12	44.84	0.3792	0.5641	16.86
181	37.7	28.405	20	58.14	44.85	0.3793	0.5642	16.9
182	37.7	28.407	20	58.17	44.87	0.3793	0.5645	16.99
183	37.5	28.474	20	58.21	44.92	0.3794	0.5647	16.99
184	37.5	28.477	20	58.19	44.92	0.3803	0.5662	16.94
185	37.4	28.489	20	58.25	44.96	0.3816	0.5683	17.08
186	37.3	28.511	20	58.25	44.97	0.3831	0.5707	17.04
187	37.3	28.527	20	58.21	44.96	0.3828	0.5701	16.93
188	37.3	28.529	20	58.24	44.97	0.3815	0.5685	16.99
189	37.4	28.494	20	58.23	44.95	0.3807	0.5673	17.02
190	37.2	28.545	20	58.25	44.99	0.3791	0.5647	17
191	37.2	28.535	20	58.32	45.02	0.3771	0.5621	17.2
192	37.1	28.557	20	58.33	45.04	0.3773	0.5625	17.2
193	37	28.588	20	58.39	45.09	0.3785	0.5644	17.31
194	36.8	28.636	20	58.41	45.13	0.3803	0.5674	17.29
195	36.8	28.653	20	58.42	45.14	0.3823	0.5705	17.29
196	36.7	28.678	20	58.31	45.1	0.3843	0.5732	16.98
197	36.7	28.68	20	58.39	45.14	0.3831	0.5721	17.17
198	36.6	28.697	20	58.41	45.16	0.3835	0.5725	17.22
199	36.6	28.694	20	58.4	45.16	0.3845	0.5739	17.2
200	36.6	28.71	20	58.38	45.15	0.3877	0.5788	17.11
201	36.6	28.71	20	58.4	45.17	0.3887	0.5803	17.17
202	36.2	28.81	20	58.43	45.24	0.388	0.5798	17.1
203	36.1	28.827	20	58.46	45.27	0.3885	0.5807	17.17
204	36.1	28.834	20	58.51	45.3	0.388	0.5803	17.29
205	35.9	28.88	20	58.57	45.35	0.3831	0.5731	17.37
206	36	28.868	20	58.63	45.38	0.3817	0.571	17.58
207	35.8	28.921	20	58.7	45.44	0.3817	0.5717	17.67
208	35.6	28.973	20	58.71	45.48	0.3819	0.572	17.63
209	35.5	28.984	20	58.75	45.51	0.3822	0.5726	17.75
210	35.5	29.003	20	58.75	45.52	0.3819	0.5722	17.71
211	35.3	29.033	20	58.78	45.56	0.3845	0.5763	17.76
212	35.1	29.093	20	58.84	45.62	0.3823	0.5735	17.84
213	35.1	29.097	20	58.88	45.64	0.3825	0.5738	17.93
214	35	29.141	20	58.89	45.68	0.3827	0.5743	17.9
215	34.9	29.151	20	58.91	45.69	0.383	0.575	17.95
216	34.7	29.222	20	58.95	45.75	0.3825	0.5745	17.96
217	34.7	29.222	20	59	45.78	0.3824	0.5747	18.1
218	34.4	29.284	20	59.03	45.83	0.3825	0.575	18.1
219	34.5	29.279	20	59.04	45.83	0.3838	0.5771	18.13
220	34.4	29.293	20	59.05	45.85	0.3846	0.5783	18.14
221	34.2	29.364	20	59.09	45.91	0.3844	0.5779	18.16
222	34.1	29.373	20	59.16	45.95	0.3845	0.5784	18.33
223	34.1	29.371	20	59.13	45.93	0.3847	0.579	18.25
224	33.9	29.427	20	59.17	45.99	0.3834	0.5772	18.28
225	34	29.403	20	59.17	45.98	0.3843	0.5786	18.33
226	34	29.422	20	59.16	45.98	0.386	0.5813	18.26
227	34.1	29.391	20	59.28	46.03	0.3787	0.5704	18.7
228	33.9	29.448	20	59.28	46.06	0.3784	0.57	18.59
229	34	29.419	20	59.28	46.04	0.3788	0.5706	18.64
230	34	29.425	20	59.3	46.06	0.379	0.5708	18.68
231	33.9	29.441	20	59.32	46.08	0.3791	0.5712	18.73
232	33.8	29.481	20	59.3	46.09	0.3825	0.5764	18.59
233	33.8	29.475	20	59.33	46.1	0.3805	0.5734	18.71
234	33.7	29.512	20	59.34	46.13	0.3798	0.5724	18.66
235	33.7	29.484	20	59.34	46.11	0.3797	0.5722	18.71
236	33.7	29.501	20	59.37	46.14	0.3792	0.5717	18.78
237	33.5	29.552	20	59.38	46.17	0.3796	0.5723	18.73
238	33.5	29.545	20	59.4	46.18	0.3795	0.5723	18.82
239	33.5	29.563	20	59.41	46.2	0.3812	0.575	18.82
240	33.5	29.56	20	59.39	46.18	0.383	0.5778	18.75
241	33.4	29.59	20	59.39	46.2	0.3859	0.5821	18.71
242	33.5	29.561	20	59.31	46.14	0.3892	0.587	18.51
243	33.5	29.557	20	59.3	46.13	0.3885	0.5858	18.48
244	33.5	29.553	20	59.29	46.13	0.3887	0.5862	18.47
245	33.5	29.566	20	59.31	46.14	0.3855	0.5812	18.5
246	33.6	29.534	20	59.31	46.13	0.3843	0.5792	18.56
247	33.8	29.467	20	59.34	46.1	0.3814	0.5749	18.76
248	33.7	29.499	20	59.32	46.11	0.3828	0.5768	18.63
249	33.7	29.499	20	59.3	46.1	0.3829	0.5768	18.57
250	33.8	29.483	20	59.29	46.09	0.382	0.5755	18.58
251	33.7	29.488	20	59.32	46.1	0.3832	0.5774	18.65
252	33.8	29.463	20	59.35	46.11	0.3825	0.5765	18.79
253	33.7	29.505	20	59.27	46.09	0.3869	0.5832	18.48
254	33.7	29.495	20	59.23	46.06	0.3897	0.5873	18.37
255	33.7	29.505	20	59.24	46.07	0.3898	0.5871	18.38
256	33.7	29.491	20	59.22	46.05	0.3899	0.5877	18.33
257	33.6	29.525	20	59.26	46.09	0.3835	0.5781	18.41
258	33.7	29.5	20	59.35	46.12	0.3792	0.5716	18.71
259	33.7	29.49	20	59.36	46.12	0.3802	0.573	18.76
260	33.5	29.547	20	59.34	46.15	0.3836	0.5784	18.61
261	33.4	29.579	20	59.38	46.19	0.3821	0.5763	18.71
262	33.4	29.574	20	59.39	46.19	0.3838	0.579	18.73
263	33.4	29.594	20	59.39	46.2	0.3842	0.5795	18.69
264	33.4	29.584	20	59.4	46.2	0.3827	0.5774	18.76
265	33.2	29.644	20	59.44	46.26	0.3814	0.5758	18.78
266	33.2	29.632	20	59.46	46.26	0.3817	0.5764	18.87
267	33.3	29.624	20	59.43	46.24	0.3808	0.5749	18.78
268	33.3	29.63	20	59.41	46.23	0.3814	0.5757	18.71
269	33.3	29.614	20	59.43	46.23	0.3819	0.5764	18.79
270	33.2	29.645	20	59.48	46.28	0.3814	0.5761	18.9
271	33.1	29.684	20	59.5	46.31	0.3822	0.5773	18.9
272	33	29.714	20	59.5	46.33	0.3821	0.5775	18.86
273	33	29.72	20	59.54	46.35	0.3819	0.5768	18.95
274	32.9	29.729	20	59.53	46.36	0.3829	0.5784	18.94
275	32.8	29.773	20	59.57	46.4	0.3828	0.5786	18.99
276	32.8	29.78	20	59.58	46.41	0.3831	0.5793	18.99
277	32.8	29.766	20	59.6	46.41	0.3829	0.579	19.07
278	32.7	29.797	20	59.6	46.43	0.3828	0.5791	19.04
279	32.7	29.806	20	59.63	46.45	0.3828	0.5788	19.13
280	32.4	29.874	20	59.67	46.51	0.382	0.5781	19.13
281	32.4	29.874	20	59.7	46.52	0.3826	0.5791	19.23
282	32.5	29.854	20	59.72	46.52	0.3824	0.579	19.31
283	32.2	29.938	20	59.72	46.57	0.3823	0.5789	19.19
284	32.3	29.929	20	59.71	46.56	0.3841	0.5819	19.17
285	32.2	29.947	20	59.69	46.56	0.384	0.5815	19.1
286	32.4	29.893	20	59.7	46.54	0.3834	0.5806	19.22
287	32.3	29.909	20	59.67	46.53	0.3818	0.578	19.09
288	32.3	29.905	20	59.73	46.56	0.3831	0.58	19.27
289	32.3	29.916	20	59.72	46.56	0.3835	0.5807	19.22
290	32.2	29.935	20	59.75	46.59	0.3825	0.5796	19.29
291	32.1	29.995	20	59.77	46.63	0.3822	0.5792	19.26
292	32.2	29.946	20	59.79	46.61	0.3825	0.5796	19.4
293	32.1	29.965	20	59.76	46.61	0.3834	0.5806	19.29
294	32.5	29.872	20	59.75	46.55	0.3856	0.5839	19.4
295	32.5	29.864	20	59.69	46.52	0.3854	0.5834	19.23
296	32.5	29.842	20	59.59	46.45	0.3849	0.5823	18.94
297	32.9	29.749	20	59.55	46.37	0.3847	0.5816	18.95
298	32.9	29.721	20	59.5	46.33	0.3844	0.5807	18.85
299	32.9	29.731	20	59.47	46.32	0.3847	0.5812	18.74
300	33.1	29.667	20	59.46	46.28	0.3869	0.5843	18.8
301	33.2	29.633	20	59.49	46.28	0.3846	0.5806	18.96
302	33.3	29.619	20	59.47	46.26	0.3825	0.5773	18.9
303	33.4	29.594	20	59.44	46.23	0.3814	0.5756	18.87
304	33.5	29.564	20	59.42	46.2	0.3809	0.5746	18.86
305	33.5	29.542	20	59.34	46.15	0.382	0.5759	18.64
306	33.9	29.447	20	59.28	46.06	0.384	0.5787	18.59
307	34.1	29.381	20	59.18	45.97	0.3852	0.5798	18.41
308	34.4	29.29	20	59.1	45.87	0.3845	0.5781	18.3
309	34.7	29.207	20	59.04	45.79	0.382	0.5738	18.24
310	35.1	29.094	20	58.93	45.67	0.3843	0.5767	18.08
311	35.5	28.982	20	58.79	45.53	0.3862	0.5788	17.84
312	36.1	28.832	20	58.66	45.37	0.3865	0.578	17.69
313	36.4	28.741	20	58.5	45.24	0.3852	0.5755	17.4
314	36.9	28.626	20	58.4	45.11	0.3851	0.5745	17.28
315	37.4	28.498	20	58.24	44.96	0.3859	0.5749	17.05
316	37.9	28.36	20	58.09	44.79	0.3859	0.574	16.83
317	38.5	28.211	20	57.97	44.64	0.3846	0.571	16.73
318	39	28.092	20	57.82	44.49	0.3883	0.5759	16.52
319	39.6	27.968	20	57.68	44.34	0.3874	0.5735	16.31
320	40.2	27.823	20	57.55	44.19	0.3861	0.5706	16.21
321	40.6	27.729	20	57.38	44.04	0.3851	0.5681	15.91
322	41.3	27.564	20	57.23	43.86	0.3857	0.5681	15.77
323	41.9	27.435	20	57.1	43.71	0.3847	0.5654	15.62
324	42.4	27.329	20	56.96	43.57	0.3863	0.567	15.43
325	42.9	27.221	20	56.81	43.43	0.3852	0.5646	15.25
326	43.4	27.129	20	56.66	43.29	0.3842	0.5625	15.01
327	44	26.996	20	56.52	43.14	0.3826	0.5591	14.87
328	45.1	26.78	20	56.26	42.87	0.3827	0.5577	14.58
329	45.7	26.671	20	56.14	42.74	0.381	0.5546	14.46
330	46.2	26.58	20	56.01	42.61	0.3825	0.5557	14.3
331	46.8	26.458	20	55.89	42.47	0.3809	0.5527	14.2
332	47.3	26.371	20	55.75	42.34	0.3817	0.5531	14.02
333	47.8	26.283	20	55.65	42.24	0.3808	0.5512	13.93
334	48	26.24	20	55.52	42.14	0.38	0.5495	13.72
335	48.7	26.127	20	55.41	42.01	0.3796	0.5482	13.64
336	49.2	26.042	20	55.3	41.9	0.3789	0.5464	13.52
337	49.7	25.952	20	55.21	41.79	0.3778	0.5442	13.44
338	50.1	25.891	20	55.11	41.7	0.3788	0.5451	13.32
339	50.6	25.799	20	55.01	41.59	0.3779	0.5431	13.24
340	51	25.746	20	54.89	41.49	0.3778	0.5425	13.08
341	51.5	25.665	20	54.79	41.39	0.3774	0.5412	13
342	51.8	25.606	20	54.73	41.32	0.3763	0.5393	12.94
343	52.3	25.537	20	54.64	41.23	0.3766	0.5392	12.86
344	52.6	25.482	20	54.56	41.15	0.3764	0.5383	12.78
345	53.1	25.409	20	54.46	41.05	0.3751	0.5361	12.69
346	53.5	25.343	20	54.37	40.96	0.3759	0.5365	12.6
347	53.9	25.281	20	54.3	40.88	0.3746	0.5345	12.54
348	54.2	25.248	20	54.18	40.8	0.3738	0.5328	12.38
349	54.6	25.19	20	54.08	40.71	0.3725	0.5303	12.28
350	55	25.12	20	54.01	40.63	0.3721	0.5295	12.23
351	55.4	25.075	20	53.9	40.54	0.3723	0.5293	12.1
352	55.6	25.038	20	53.85	40.49	0.372	0.5285	12.06
353	55.9	25.002	20	53.79	40.44	0.3712	0.5269	12
354	56.2	24.949	20	53.73	40.37	0.3707	0.526	11.95
355	56.6	24.906	20	53.65	40.3	0.3711	0.5263	11.87
356	57	24.85	20	53.58	40.22	0.371	0.5256	11.81
357	57.2	24.814	20	53.53	40.18	0.3708	0.5251	11.77
358	57.6	24.767	20	53.5	40.13	0.3696	0.5233	11.77
359	57.7	24.754	20	53.43	40.08	0.3699	0.5232	11.66
360	58.1	24.703	20	53.36	40.02	0.3695	0.5222	11.62
361	58.6	24.635	20	53.31	39.94	0.3696	0.5221	11.6
362	58.5	24.638	20	53.28	39.93	0.3684	0.5203	11.55
363	58.8	24.61	20	53.21	39.87	0.3703	0.5226	11.48
364	59.2	24.551	20	53.16	39.81	0.369	0.5207	11.46
365	59.4	24.525	20	53.11	39.76	0.3693	0.5206	11.4
366	59.5	24.517	20	53.04	39.72	0.3688	0.5196	11.31
367	59.9	24.461	20	53.01	39.67	0.3696	0.5205	11.32
368	60.1	24.444	20	52.98	39.64	0.3685	0.519	11.3
369	60.3	24.407	20	52.94	39.6	0.3684	0.5186	11.27
370	60.5	24.39	20	52.89	39.56	0.368	0.5175	11.2
371	60.5	24.386	20	52.93	39.58	0.3631	0.5109	11.27
372	61	24.329	20	52.92	39.54	0.3617	0.5085	11.31
373	60.8	24.345	20	52.9	39.53	0.3617	0.5086	11.26
374	61.1	24.315	20	52.87	39.5	0.3613	0.5079	11.25
375	61.2	24.304	20	52.81	39.46	0.3615	0.5079	11.17
376	61.5	24.26	20	52.79	39.42	0.3612	0.507	11.19
377	61.9	24.22	20	52.73	39.37	0.3637	0.5106	11.14
378	61.8	24.233	20	52.76	39.39	0.3597	0.505	11.16
379	61.9	24.217	20	52.72	39.36	0.3586	0.5031	11.13
380	62	24.209	20	52.69	39.33	0.3579	0.5021	11.09
381	62.5	24.15	20	52.67	39.29	0.3578	0.5016	11.12
382	62.6	24.134	20	52.63	39.26	0.3578	0.5015	11.08
383	62.6	24.131	20	52.61	39.24	0.3584	0.5024	11.05
384	62.9	24.098	20	52.53	39.18	0.3658	0.5124	10.96
385	63	24.088	20	52.42	39.11	0.3666	0.5133	10.82
386	63.1	24.078	20	52.37	39.08	0.3663	0.5126	10.77
387	63.2	24.06	20	52.36	39.06	0.3659	0.5123	10.76
388	63.3	24.057	20	52.35	39.06	0.3662	0.5125	10.76
389	63.6	24.015	20	52.33	39.02	0.3658	0.5116	10.76
390	63.6	24.015	20	52.31	39.01	0.3658	0.5118	10.73
391	63.8	23.992	20	52.27	38.97	0.3658	0.5113	10.7
392	64.2	23.952	20	52.25	38.93	0.366	0.5116	10.71
393	64.1	23.959	20	52.24	38.93	0.3652	0.5104	10.69
394	64.1	23.964	20	52.2	38.91	0.3658	0.5112	10.64
395	64.5	23.91	20	52.14	38.85	0.3653	0.5099	10.6
396	64.4	23.92	20	52.13	38.85	0.3649	0.5094	10.58
397	64.6	23.901	20	52.13	38.84	0.3648	0.5093	10.6
398	64.8	23.88	20	52.11	38.81	0.3648	0.5091	10.59
399	65	23.855	20	52.07	38.77	0.3648	0.5088	10.55
400	65.2	23.839	20	52.04	38.75	0.3648	0.5089	10.53
401	64.9	23.873	20	52.03	38.76	0.3652	0.5093	10.48
402	65.5	23.805	20	52.03	38.72	0.3642	0.5081	10.54
403	65.4	23.815	20	52.01	38.71	0.3645	0.5081	10.51
404	65.4	23.811	20	51.98	38.69	0.3647	0.5082	10.47
405	65.4	23.816	20	51.94	38.68	0.3644	0.5078	10.42
406	65.6	23.797	20	51.96	38.68	0.3642	0.5075	10.46
407	65.8	23.771	20	51.93	38.64	0.3645	0.5078	10.45
408	65.8	23.768	20	51.9	38.63	0.3641	0.5072	10.41
409	65.9	23.762	20	51.89	38.61	0.364	0.5068	10.4
410	66	23.753	20	51.87	38.6	0.3641	0.5069	10.38
411	66.1	23.737	20	51.9	38.61	0.3631	0.5057	10.43
412	66.1	23.734	20	51.87	38.59	0.3623	0.5045	10.4
413	66.4	23.703	20	51.93	38.6	0.3593	0.5002	10.5
414	66.3	23.713	20	51.94	38.61	0.3542	0.4933	10.51
415	66.5	23.696	20	51.93	38.59	0.3539	0.4927	10.51
416	66.5	23.693	20	51.92	38.59	0.3537	0.4925	10.5
417	66.6	23.685	20	51.91	38.58	0.3539	0.4926	10.5
418	66.7	23.67	20	51.87	38.55	0.3553	0.4946	10.46
419	66.8	23.664	20	51.84	38.52	0.3562	0.4955	10.42
420	66.9	23.655	20	51.85	38.52	0.3547	0.4933	10.43
421	66.7	23.669	20	51.84	38.53	0.3542	0.4927	10.41
422	67	23.644	20	51.84	38.51	0.3544	0.4931	10.43
423	67	23.642	20	51.81	38.5	0.3544	0.493	10.4
424	67.2	23.622	20	51.8	38.47	0.3557	0.4946	10.4
425	67.2	23.616	20	51.75	38.45	0.3584	0.498	10.34
426	67.3	23.611	20	51.78	38.46	0.3548	0.4933	10.39
427	67.1	23.627	20	51.78	38.47	0.3529	0.4907	10.37
428	67.4	23.595	20	51.77	38.44	0.3529	0.4906	10.39
429	67.3	23.605	20	51.72	38.42	0.3528	0.4904	10.32
430	67.3	23.606	20	51.73	38.43	0.353	0.4905	10.32
431	67.3	23.605	20	51.72	38.42	0.3531	0.4908	10.31
432	67.4	23.596	20	51.71	38.41	0.3558	0.4943	10.31
433	67.7	23.566	20	51.72	38.39	0.3527	0.4899	10.34
434	67.8	23.554	20	51.67	38.36	0.3529	0.4904	10.29
435	67.8	23.555	20	51.67	38.36	0.3528	0.4897	10.29
436	68	23.541	20	51.68	38.36	0.3525	0.4896	10.32
437	68	23.535	20	51.66	38.34	0.3523	0.4894	10.29
438	67.8	23.556	20	51.62	38.34	0.3537	0.491	10.23
439	68	23.532	20	51.63	38.32	0.3546	0.4922	10.26
440	68.2	23.514	20	51.62	38.31	0.3527	0.4896	10.26
441	68.2	23.519	20	51.63	38.32	0.3524	0.489	10.27
442	68.3	23.509	20	51.6	38.29	0.3525	0.4892	10.24
443	68.1	23.528	20	51.57	38.29	0.3526	0.4892	10.19
444	68.5	23.488	20	51.51	38.23	0.3523	0.4887	10.15
445	68.9	23.447	20	51.54	38.22	0.3544	0.4915	10.22
446	68.7	23.463	20	51.49	38.2	0.3566	0.4947	10.14
447	68.5	23.482	20	51.54	38.24	0.354	0.4909	10.18
448	68.6	23.479	20	51.52	38.23	0.3539	0.4908	10.16
449	68.7	23.461	20	51.5	38.21	0.3541	0.4911	10.15
450	68.7	23.462	20	51.48	38.2	0.3541	0.4907	10.13
451	68.6	23.475	20	51.51	38.22	0.3538	0.4906	10.15
452	69	23.434	20	51.48	38.18	0.3538	0.4905	10.16
453	69.2	23.41	20	51.47	38.16	0.354	0.491	10.17
454	69.2	23.415	20	51.45	38.15	0.3561	0.4935	10.14
455	69.1	23.425	20	51.43	38.15	0.3566	0.4942	10.09
456	69.2	23.413	20	51.43	38.14	0.3571	0.495	10.11
457	69.3	23.403	20	51.41	38.12	0.356	0.493	10.09
458	69.3	23.406	20	51.41	38.13	0.356	0.4931	10.09
459	69.5	23.379	20	51.39	38.09	0.3561	0.4932	10.08
460	69.4	23.391	20	51.39	38.11	0.3557	0.4928	10.08
461	69.7	23.365	20	51.4	38.09	0.3557	0.4928	10.11
462	69.3	23.4	20	51.37	38.1	0.3557	0.4926	10.05
463	69.8	23.358	20	51.37	38.07	0.3556	0.4925	10.08
464	69.7	23.359	20	51.33	38.05	0.3556	0.4925	10.03
465	69.7	23.359	20	51.34	38.06	0.3558	0.4926	10.04
466	69.8	23.358	20	51.34	38.06	0.3555	0.4921	10.04
467	70	23.331	20	51.33	38.03	0.3554	0.4922	10.05
468	69.9	23.348	20	51.29	38.02	0.3556	0.4923	9.99
469	69.7	23.362	20	51.3	38.04	0.3555	0.492	9.99
470	69.8	23.356	20	51.32	38.05	0.3554	0.4919	10.02
471	70	23.332	20	51.29	38.01	0.3552	0.4915	10
472	70.4	23.296	20	51.3	37.99	0.3553	0.4917	10.04
473	70.3	23.308	20	51.26	37.98	0.3553	0.4915	9.99
474	70.1	23.32	20	51.28	38	0.3552	0.4915	9.99
475	70.1	23.321	20	51.28	38	0.3553	0.4916	10
476	70.1	23.325	20	51.25	37.99	0.3552	0.4914	9.96
477	70.3	23.306	20	51.25	37.97	0.3553	0.4916	9.97
478	70.4	23.299	20	51.23	37.96	0.3553	0.4915	9.95
479	70.3	23.308	20	51.23	37.96	0.3549	0.4911	9.95
480	70.4	23.296	20	51.25	37.97	0.3552	0.4914	9.98
481	70.4	23.295	20	51.24	37.96	0.3551	0.491	9.97
482	70.5	23.29	20	51.22	37.95	0.3549	0.4908	9.95
483	70.4	23.291	20	51.21	37.94	0.3549	0.4909	9.94
484	70.6	23.277	20	51.22	37.94	0.3548	0.4908	9.97
485	70.4	23.293	20	51.21	37.94	0.3549	0.491	9.93
486	70.6	23.272	20	51.2	37.92	0.3547	0.4906	9.94
487	70.4	23.298	20	51.17	37.92	0.3548	0.4904	9.88
488	70.6	23.277	20	51.16	37.9	0.3549	0.4907	9.89
489	70.5	23.286	20	51.17	37.92	0.3548	0.4905	9.9
490	70.6	23.273	20	51.18	37.92	0.3546	0.4903	9.92
491	70.7	23.261	20	51.16	37.9	0.3547	0.4902	9.9
492	70.9	23.246	20	51.16	37.89	0.3547	0.4903	9.91
493	71	23.24	20	51.16	37.88	0.3546	0.4901	9.91
494	70.9	23.246	20	51.15	37.88	0.3546	0.4902	9.9
495	70.6	23.272	20	51.16	37.9	0.3548	0.4905	9.89
496	70.8	23.252	20	51.12	37.87	0.3558	0.4918	9.86
497	70.8	23.259	20	51.09	37.86	0.3545	0.49	9.82
498	71.2	23.222	20	51.11	37.84	0.3545	0.4898	9.87
499	70.7	23.265	20	51.09	37.86	0.3552	0.4909	9.81
500	71	23.235	20	51.13	37.86	0.3545	0.4898	9.89
501	71.3	23.205	20	51.1	37.83	0.3543	0.4895	9.87
502	71.1	23.222	20	51.1	37.84	0.3543	0.4894	9.86
503	71.4	23.201	20	51.09	37.82	0.3542	0.4894	9.87
504	71	23.233	20	51.1	37.84	0.3544	0.4895	9.85
505	71.2	23.218	20	51.1	37.83	0.3544	0.4896	9.86
506	71.1	23.231	20	51.08	37.83	0.3543	0.4894	9.82
507	71.2	23.216	20	51.07	37.82	0.3543	0.4892	9.83
508	71.3	23.21	20	51.06	37.81	0.3542	0.4892	9.82
509	71.1	23.223	20	51.07	37.82	0.3541	0.4892	9.82
510	71.3	23.211	20	51.06	37.81	0.3542	0.4892	9.82
511	71.2	23.213	20	51.03	37.8	0.3541	0.489	9.79
512	71.5	23.185	20	51.05	37.79	0.3541	0.4889	9.83
513	71.6	23.175	20	51.05	37.78	0.3542	0.4893	9.84
514	71.5	23.186	20	51.02	37.77	0.3555	0.491	9.8
515	71.6	23.179	20	50.98	37.74	0.3569	0.4927	9.75
516	71.9	23.146	20	50.98	37.72	0.3568	0.4923	9.78
517	71.8	23.16	20	50.97	37.73	0.3566	0.492	9.75
518	71.6	23.178	20	50.98	37.74	0.3566	0.4921	9.75
519	71.7	23.173	20	50.95	37.73	0.3565	0.4919	9.72
520	71.9	23.152	20	50.95	37.71	0.3563	0.4916	9.74
521	72	23.14	20	50.93	37.69	0.3563	0.4916	9.72

## Sheet: N2-high-1.2-bwd
Colibri Photonics GmbH Ibidi-OPAL	Dezimaltrennzeichen: Komma				spot:	B	gasflow:	high	pumppress:	50 kPa
2016-02-17	1899-12-31 19:08:11				frequency:	1.2 Hz	dir:	bwd	pumpvac:	-50 kPa
tau100 = 21,130 Âµs @ 20 Â°C	tau0 = 59,000 Âµs @ 20 Â°C	f = 0,75			pumpgas:	N2
T-Korr von tau100 = -0,0272 Âµs / Â°C	T-Korr von tau0 = -0,0203 Âµs / Â°C
Freq 1 = 11,993 kHz	Freq 2 = 6,323 kHz
Zeit / s	O2-Gehalt / %-Luft	tau / Âµs	T / Â°C	Phase1 / Â° @ 11,993 kHz	Phase2 / Â° @ 6,323 kHz	Amplitude1 / V p-p	Amplitude2 / V p-p	Signal : Untergrund
1	92.6	21.561	20	48.04	35.08	0.342	0.4598	7.89
2	92.4	21.574	20	48.02	35.08	0.3419	0.4597	7.87
3	92.4	21.576	20	48.02	35.08	0.3419	0.4597	7.87
4	92.3	21.578	20	48.04	35.1	0.3422	0.46	7.89
5	92.8	21.551	20	48.04	35.07	0.3423	0.46	7.9
6	92.6	21.563	20	48.01	35.07	0.3421	0.4598	7.87
7	92.9	21.544	20	48.02	35.06	0.3419	0.4596	7.89
8	93	21.537	20	48.02	35.06	0.342	0.4597	7.89
9	92.9	21.543	20	48.04	35.07	0.3421	0.4598	7.91
10	92.4	21.571	20	48.02	35.08	0.342	0.4597	7.87
11	93.3	21.516	20	48.03	35.05	0.3419	0.4595	7.92
12	92.4	21.571	20	48.01	35.07	0.3418	0.4595	7.86
13	92.4	21.573	20	48	35.07	0.342	0.4596	7.85
14	92.7	21.552	20	48.03	35.07	0.3421	0.4599	7.89
15	92.6	21.562	20	48.01	35.07	0.3421	0.4596	7.87
16	93	21.536	20	48.01	35.05	0.342	0.4597	7.88
17	92.8	21.552	20	48	35.06	0.3419	0.4595	7.87
18	92.7	21.553	20	48.01	35.06	0.342	0.4597	7.88
19	92.5	21.569	20	48.02	35.08	0.3422	0.46	7.87
20	92.7	21.556	20	48	35.06	0.342	0.4596	7.87
21	92.9	21.542	20	47.99	35.05	0.342	0.4596	7.87
22	92.7	21.552	20	48	35.06	0.3418	0.4593	7.87
23	92.7	21.558	20	48	35.06	0.3421	0.4597	7.87
24	92.5	21.568	20	48.02	35.08	0.3422	0.46	7.88
25	92.6	21.563	20	47.98	35.05	0.3422	0.4599	7.85
26	93.6	21.502	20	48	35.02	0.3419	0.4595	7.9
27	93.1	21.533	20	47.99	35.04	0.3419	0.4593	7.87
28	92.9	21.54	20	48.01	35.05	0.3422	0.4597	7.88
29	93.1	21.531	20	48.01	35.04	0.3421	0.4599	7.89
30	92.8	21.549	20	47.99	35.05	0.3419	0.4594	7.86
31	93.3	21.519	20	47.97	35.02	0.3418	0.4593	7.87
32	93.2	21.526	20	47.99	35.03	0.3418	0.4591	7.87
33	92.9	21.542	20	47.99	35.05	0.3419	0.4596	7.87
34	92.9	21.541	20	47.98	35.04	0.3418	0.4593	7.86
35	93.6	21.5	20	47.97	35	0.3418	0.4593	7.87
36	92.9	21.542	20	47.98	35.04	0.3418	0.4593	7.86
37	93.1	21.531	20	47.98	35.03	0.3422	0.4597	7.86
38	93.1	21.531	20	47.98	35.03	0.3429	0.4606	7.86
39	93.1	21.532	20	47.97	35.03	0.3427	0.4604	7.86
40	93.2	21.522	20	47.96	35.02	0.3426	0.4603	7.86
41	92.9	21.546	20	47.96	35.03	0.3428	0.4604	7.84
42	93.2	21.522	20	47.98	35.03	0.343	0.4608	7.87
43	93.2	21.526	20	47.97	35.02	0.3428	0.4606	7.86
44	93.2	21.527	20	47.95	35.01	0.3428	0.4603	7.84
45	93.5	21.504	20	47.96	35	0.3427	0.4603	7.86
46	92.7	21.557	20	47.96	35.04	0.3428	0.4604	7.83
47	93	21.537	20	47.98	35.03	0.3429	0.4607	7.86
48	92.7	21.553	20	47.98	35.05	0.3429	0.4607	7.85
49	93	21.538	20	47.96	35.02	0.3426	0.4603	7.84
50	93.1	21.532	20	47.98	35.03	0.3427	0.4603	7.86
51	93.3	21.517	20	47.98	35.02	0.3428	0.4605	7.87
52	93.2	21.526	20	48.01	35.04	0.3429	0.4609	7.89
53	93.2	21.524	20	47.98	35.03	0.3429	0.4607	7.87
54	93.1	21.528	20	47.96	35.02	0.3427	0.4604	7.85
55	92.7	21.554	20	47.95	35.03	0.3427	0.4604	7.82
56	93	21.535	20	47.96	35.02	0.343	0.4608	7.85
57	93.2	21.525	20	47.99	35.03	0.3431	0.4609	7.88
58	92.9	21.543	20	47.97	35.03	0.3429	0.4608	7.85
59	93.2	21.525	20	47.96	35.02	0.3427	0.4604	7.85
60	93.4	21.512	20	47.96	35.01	0.3427	0.4603	7.86
61	92.9	21.542	20	47.98	35.04	0.3427	0.4605	7.85
62	93.3	21.517	20	48	35.03	0.3429	0.4608	7.89
63	93	21.535	20	47.97	35.03	0.3425	0.46	7.85
64	93.1	21.527	20	47.97	35.02	0.3419	0.4594	7.85
65	93	21.539	20	47.96	35.02	0.3419	0.4593	7.84
66	93	21.534	20	47.96	35.02	0.3447	0.463	7.84
67	92.6	21.562	20	47.91	35.01	0.348	0.4672	7.78
68	93.2	21.523	20	48	35.03	0.3455	0.4643	7.88
69	91.8	21.609	20	48.07	35.13	0.3435	0.4618	7.9
70	91.6	21.622	20	48.17	35.19	0.3435	0.4622	7.97
71	90.7	21.683	20	48.26	35.28	0.3442	0.4635	8.01
72	90	21.729	20	48.35	35.36	0.3452	0.4652	8.06
73	88.7	21.815	20	48.47	35.48	0.3459	0.4666	8.12
74	88	21.862	20	48.57	35.57	0.3463	0.4677	8.18
75	86.7	21.946	20	48.73	35.71	0.3468	0.4689	8.27
76	85.4	22.044	20	48.9	35.87	0.348	0.4711	8.37
77	84.3	22.117	20	49.06	36.01	0.3486	0.4728	8.48
78	83.1	22.206	20	49.22	36.15	0.3493	0.4745	8.57
79	81.9	22.301	20	49.39	36.31	0.35	0.476	8.67
80	80.4	22.412	20	49.57	36.48	0.3509	0.4783	8.78
81	78.7	22.548	20	49.79	36.69	0.352	0.4806	8.91
82	77.4	22.656	20	49.97	36.86	0.3528	0.4825	9.02
83	76.3	22.753	20	50.17	37.03	0.3536	0.4844	9.16
84	74.7	22.895	20	50.35	37.22	0.3542	0.4861	9.25
85	73.2	23.027	20	50.56	37.42	0.3551	0.4885	9.39
86	72	23.138	20	50.78	37.61	0.3562	0.491	9.56
87	70.7	23.266	20	50.97	37.79	0.3571	0.493	9.67
88	69.7	23.366	20	51.17	37.97	0.3578	0.4949	9.83
89	68.3	23.51	20	51.35	38.16	0.3585	0.497	9.93
90	67.5	23.589	20	51.58	38.34	0.3596	0.4994	10.15
91	66	23.751	20	51.78	38.55	0.3606	0.5018	10.27
92	65	23.862	20	51.97	38.72	0.3612	0.5035	10.42
93	63.9	23.979	20	52.15	38.89	0.3618	0.5055	10.55
94	63.1	24.076	20	52.35	39.06	0.3625	0.5073	10.73
95	61.8	24.223	20	52.53	39.26	0.3636	0.5097	10.85
96	60.9	24.341	20	52.73	39.44	0.3644	0.512	11.02
97	60	24.455	20	52.88	39.6	0.365	0.5135	11.14
98	59	24.579	20	53.06	39.77	0.3656	0.5153	11.29
99	58.1	24.695	20	53.22	39.93	0.3661	0.5171	11.41
100	56.6	24.899	20	53.59	40.26	0.3679	0.5212	11.78
101	55.9	25.003	20	53.74	40.41	0.3683	0.5227	11.9
102	55.2	25.095	20	53.89	40.55	0.3688	0.5242	12.06
103	54.5	25.194	20	54.02	40.68	0.3693	0.5257	12.17
104	53.6	25.334	20	54.19	40.86	0.3701	0.5278	12.31
105	53.1	25.406	20	54.34	40.99	0.3708	0.5295	12.49
106	52.4	25.517	20	54.47	41.12	0.3711	0.5307	12.59
107	51.8	25.607	20	54.6	41.25	0.3716	0.532	12.72
108	51.2	25.71	20	54.72	41.38	0.3717	0.5331	12.83
109	50.7	25.787	20	54.86	41.5	0.3729	0.5354	12.99
110	50	25.909	20	54.99	41.65	0.3732	0.5365	13.09
111	49.6	25.968	20	55.1	41.74	0.3734	0.5375	13.23
112	49.2	26.043	20	55.2	41.85	0.374	0.5389	13.33
113	48.6	26.132	20	55.32	41.96	0.3741	0.5397	13.45
114	48.1	26.227	20	55.46	42.1	0.3749	0.5415	13.62
115	47.7	26.297	20	55.56	42.2	0.3753	0.5427	13.73
116	47.4	26.346	20	55.66	42.28	0.3755	0.5438	13.86
117	46.9	26.438	20	55.74	42.38	0.3759	0.5447	13.92
118	46.7	26.475	20	55.84	42.46	0.3761	0.5455	14.08
119	46	26.615	20	55.94	42.6	0.3771	0.5476	14.12
120	45.8	26.655	20	56.03	42.67	0.3774	0.5485	14.25
121	45.5	26.707	20	56.11	42.74	0.3775	0.5492	14.35
122	45.1	26.794	20	56.19	42.84	0.3778	0.55	14.42
123	44.8	26.834	20	56.27	42.91	0.378	0.5508	14.54
124	44.5	26.897	20	56.38	43	0.3787	0.5523	14.69
125	44.2	26.969	20	56.44	43.08	0.3786	0.5528	14.74
126	43.9	27.029	20	56.51	43.15	0.3787	0.5534	14.8
127	43.6	27.075	20	56.57	43.21	0.3789	0.5539	14.89
128	43.3	27.153	20	56.63	43.29	0.3791	0.5547	14.91
129	43	27.215	20	56.72	43.38	0.3796	0.5559	15.05
130	42.8	27.254	20	56.79	43.44	0.3791	0.5555	15.14
131	42.7	27.267	20	56.85	43.48	0.3791	0.5558	15.26
132	42.3	27.355	20	56.89	43.56	0.3793	0.5565	15.25
133	42.2	27.386	20	56.94	43.6	0.3797	0.5573	15.32
134	41.9	27.447	20	57.02	43.68	0.38	0.5583	15.42
135	41.8	27.463	20	57.06	43.71	0.3799	0.5584	15.5
136	41.5	27.526	20	57.11	43.78	0.3797	0.5584	15.54
137	41.3	27.572	20	57.15	43.82	0.3797	0.5588	15.56
138	41.1	27.609	20	57.21	43.88	0.38	0.5595	15.66
139	40.9	27.649	20	57.29	43.94	0.3803	0.5604	15.79
140	40.8	27.673	20	57.31	43.97	0.3803	0.5606	15.8
141	40.6	27.726	20	57.36	44.03	0.3805	0.5611	15.85
142	40.5	27.748	20	57.39	44.06	0.3809	0.5618	15.92
143	40.4	27.783	20	57.44	44.1	0.3812	0.5629	15.97
144	40.2	27.827	20	57.5	44.16	0.3816	0.5635	16.07
145	40	27.861	20	57.51	44.19	0.3816	0.5638	16.04
146	39.9	27.883	20	57.55	44.22	0.3816	0.5637	16.11
147	39.8	27.906	20	57.59	44.26	0.3817	0.5641	16.19
148	39.6	27.967	20	57.63	44.32	0.3819	0.5651	16.21
149	39.5	27.992	20	57.68	44.36	0.382	0.5654	16.29
150	39.2	28.039	20	57.69	44.39	0.3819	0.5654	16.25
151	39.3	28.033	20	57.73	44.41	0.3818	0.5655	16.35
152	39.1	28.079	20	57.78	44.46	0.3818	0.5657	16.43
153	38.8	28.149	20	57.8	44.52	0.3821	0.5663	16.39
154	38.8	28.144	20	57.86	44.55	0.3822	0.5668	16.55
155	38.5	28.21	20	57.88	44.59	0.382	0.5666	16.49
156	38.6	28.19	20	57.92	44.6	0.382	0.5669	16.62
157	38.4	28.239	20	57.93	44.64	0.3821	0.5673	16.59
158	38.3	28.27	20	57.99	44.69	0.3824	0.5679	16.7
159	38.2	28.295	20	58.04	44.73	0.3824	0.5682	16.8
160	38	28.333	20	58.03	44.75	0.3823	0.5681	16.72
161	38.1	28.328	20	58.06	44.76	0.3825	0.5686	16.81
162	37.9	28.379	20	58.15	44.84	0.3832	0.5702	16.96
163	37.6	28.433	20	58.17	44.88	0.3831	0.5702	16.93
164	37.5	28.472	20	58.18	44.91	0.383	0.5703	16.91
165	37.4	28.489	20	58.19	44.92	0.3828	0.5701	16.91
166	37.2	28.54	20	58.22	44.97	0.3833	0.5706	16.92
167	37.1	28.557	20	58.28	45.01	0.3834	0.5713	17.06
168	37.1	28.574	20	58.3	45.03	0.3834	0.5713	17.1
169	37.2	28.545	20	58.31	45.02	0.3832	0.5712	17.17
170	37	28.594	20	58.34	45.06	0.3832	0.5715	17.15
171	36.9	28.627	20	58.35	45.09	0.384	0.5727	17.15
172	36.7	28.663	20	58.4	45.14	0.384	0.5729	17.24
173	36.7	28.661	20	58.39	45.13	0.3848	0.5743	17.2
174	36.7	28.674	20	58.42	45.15	0.3841	0.5734	17.27
175	36.6	28.698	20	58.45	45.18	0.3842	0.5737	17.32
176	36.5	28.723	20	58.45	45.2	0.384	0.5735	17.29
177	36.4	28.755	20	58.48	45.23	0.3842	0.5738	17.32
178	36.4	28.755	20	58.48	45.24	0.3841	0.5738	17.33
179	36.4	28.748	20	58.5	45.24	0.384	0.5738	17.38
180	36.4	28.746	20	58.51	45.24	0.384	0.5736	17.4
181	36.3	28.787	20	58.53	45.28	0.3843	0.5742	17.41
182	36.1	28.825	20	58.55	45.31	0.3845	0.5746	17.42
183	36.2	28.808	20	58.55	45.3	0.3842	0.5744	17.42
184	36.2	28.806	20	58.55	45.3	0.3843	0.5744	17.45
185	36.1	28.835	20	58.58	45.33	0.3839	0.5744	17.46
186	36.1	28.831	20	58.6	45.34	0.3845	0.5752	17.54
187	36.1	28.843	20	58.61	45.35	0.3845	0.5754	17.55
188	36	28.864	20	58.62	45.37	0.3844	0.5749	17.55
189	36.1	28.835	20	58.62	45.35	0.3843	0.5746	17.59
190	36	28.868	20	58.63	45.38	0.3843	0.575	17.56
191	35.9	28.885	20	58.65	45.4	0.3845	0.5753	17.6
192	35.9	28.894	20	58.67	45.42	0.3847	0.5757	17.65
193	35.7	28.935	20	58.68	45.44	0.3845	0.5757	17.61
194	35.8	28.923	20	58.68	45.44	0.3844	0.5756	17.63
195	35.8	28.92	20	58.7	45.45	0.3845	0.5757	17.7
196	35.5	28.98	20	58.72	45.49	0.3848	0.5763	17.66
197	35.6	28.974	20	58.74	45.5	0.3848	0.5764	17.72
198	35.5	28.999	20	58.72	45.5	0.3847	0.5765	17.64
199	35.5	28.978	20	58.75	45.51	0.3847	0.5763	17.75
200	35.3	29.048	20	58.76	45.55	0.3848	0.5766	17.68
201	35.3	29.041	20	58.8	45.57	0.3852	0.5773	17.8
202	35.3	29.047	20	58.8	45.57	0.385	0.5771	17.79
203	35.2	29.068	20	58.81	45.59	0.3849	0.577	17.79
204	35.2	29.074	20	58.82	45.6	0.3848	0.577	17.81
205	35.1	29.087	20	58.85	45.63	0.385	0.5776	17.88
206	35	29.123	20	58.9	45.67	0.3854	0.5782	17.95
207	35	29.137	20	58.9	45.68	0.3853	0.5781	17.93
208	35	29.133	20	58.91	45.68	0.3852	0.5782	17.96
209	35	29.137	20	58.92	45.69	0.3851	0.5781	18
210	34.8	29.172	20	58.95	45.73	0.3852	0.5784	18.04
211	34.8	29.196	20	58.97	45.75	0.3857	0.5794	18.04
212	34.6	29.235	20	58.98	45.78	0.3858	0.5794	18.02
213	34.6	29.229	20	58.98	45.77	0.3853	0.579	18.03
214	34.7	29.213	20	58.99	45.77	0.3854	0.579	18.09
215	34.5	29.276	20	59.03	45.83	0.3856	0.5796	18.1
216	34.6	29.245	20	59.05	45.82	0.3858	0.5799	18.22
217	34.5	29.262	20	59.05	45.83	0.3856	0.5795	18.18
218	34.3	29.315	20	59.05	45.86	0.3857	0.5797	18.12
219	34.3	29.321	20	59.07	45.88	0.3856	0.5798	18.16
220	34.3	29.331	20	59.11	45.9	0.386	0.5804	18.27
221	34.2	29.361	20	59.13	45.93	0.386	0.581	18.28
222	34.1	29.38	20	59.14	45.94	0.3859	0.5808	18.27
223	34	29.4	20	59.13	45.95	0.3859	0.5808	18.23
224	33.9	29.433	20	59.13	45.97	0.3858	0.5808	18.16
225	33.9	29.445	20	59.18	46.01	0.3861	0.5815	18.31
226	34	29.414	20	59.22	46.01	0.3863	0.5818	18.47
227	33.9	29.454	20	59.2	46.02	0.3863	0.5818	18.34
228	33.7	29.493	20	59.23	46.06	0.3859	0.5815	18.36
229	33.8	29.466	20	59.27	46.06	0.3865	0.5824	18.52
230	33.7	29.488	20	59.3	46.09	0.3865	0.5827	18.59
231	33.6	29.531	20	59.29	46.11	0.3864	0.5824	18.5
232	33.6	29.53	20	59.3	46.12	0.3863	0.5826	18.53
233	33.5	29.545	20	59.3	46.13	0.3863	0.5824	18.51
234	33.5	29.553	20	59.34	46.15	0.3869	0.5833	18.62
235	33.4	29.584	20	59.35	46.17	0.3867	0.5835	18.59
236	33.4	29.58	20	59.36	46.18	0.3865	0.5831	18.63
237	33.4	29.598	20	59.37	46.19	0.3864	0.5831	18.63
238	33.4	29.596	20	59.37	46.19	0.3864	0.5832	18.64
239	33.2	29.636	20	59.42	46.24	0.387	0.5842	18.72
240	33.2	29.648	20	59.43	46.26	0.3869	0.5842	18.75
241	33.1	29.678	20	59.43	46.27	0.3868	0.584	18.68
242	33.1	29.665	20	59.45	46.27	0.3867	0.584	18.78
243	33.1	29.68	20	59.45	46.28	0.3867	0.584	18.76
244	33	29.712	20	59.48	46.32	0.387	0.5849	18.79
245	32.9	29.726	20	59.51	46.34	0.3872	0.5849	18.85
246	32.9	29.739	20	59.51	46.35	0.387	0.5846	18.84
247	32.8	29.764	20	59.51	46.37	0.3869	0.5847	18.82
248	32.8	29.777	20	59.53	46.38	0.387	0.585	18.85
249	32.7	29.801	20	59.56	46.41	0.3875	0.5859	18.9
250	32.7	29.799	20	59.58	46.42	0.3873	0.5857	18.97
251	32.6	29.815	20	59.59	46.43	0.3871	0.5855	18.97
252	32.6	29.823	20	59.59	46.44	0.3871	0.5855	18.95
253	32.6	29.826	20	59.62	46.45	0.3872	0.5857	19.04
254	32.5	29.862	20	59.64	46.49	0.3875	0.5866	19.07
255	32.5	29.856	20	59.64	46.49	0.3874	0.5863	19.08
256	32.4	29.887	20	59.65	46.51	0.3873	0.5864	19.07
257	32.4	29.887	20	59.66	46.51	0.3875	0.5867	19.08
258	32.3	29.921	20	59.67	46.54	0.3875	0.5866	19.07
259	32.2	29.935	20	59.69	46.56	0.3877	0.5872	19.1
260	32.2	29.94	20	59.71	46.57	0.3876	0.5871	19.17
261	32.3	29.933	20	59.71	46.56	0.3876	0.587	19.17
262	32.2	29.946	20	59.72	46.58	0.3875	0.587	19.18
263	32.1	29.972	20	59.73	46.6	0.3876	0.5873	19.18
264	32.1	29.981	20	59.76	46.62	0.3882	0.5882	19.27
265	32.2	29.962	20	59.74	46.6	0.3917	0.5933	19.22
266	32.1	29.984	20	59.73	46.6	0.3917	0.5934	19.14
267	32.2	29.962	20	59.73	46.59	0.3912	0.5927	19.18
268	32.2	29.948	20	59.73	46.58	0.3907	0.592	19.2
269	32.1	29.976	20	59.72	46.59	0.3908	0.5921	19.12
270	32.1	29.983	20	59.71	46.59	0.3907	0.5918	19.1
271	32.1	29.968	20	59.7	46.58	0.3906	0.5919	19.08
272	32.1	29.996	20	59.69	46.59	0.3905	0.5916	19.01
273	32.2	29.947	20	59.74	46.59	0.3909	0.5924	19.24
274	32	30.023	20	59.7	46.61	0.3911	0.5925	19.01
275	32.1	29.979	20	59.67	46.57	0.3911	0.5926	18.97
276	32.1	29.982	20	59.68	46.58	0.3906	0.5915	19.01
277	32.1	29.977	20	59.7	46.58	0.3904	0.5916	19.07
278	32.1	29.982	20	59.73	46.6	0.3909	0.5923	19.15
279	32	29.996	20	59.73	46.61	0.3909	0.5922	19.15
280	32.1	29.982	20	59.72	46.6	0.3907	0.592	19.11
281	32.1	29.976	20	59.71	46.59	0.3906	0.592	19.11
282	32	30.013	20	59.7	46.61	0.3904	0.5916	19.02
283	32	30.004	20	59.75	46.63	0.391	0.5925	19.19
284	31.9	30.044	20	59.74	46.64	0.3907	0.5924	19.09
285	31.9	30.042	20	59.74	46.64	0.3905	0.5919	19.11
286	32	30.005	20	59.75	46.63	0.3905	0.592	19.2
287	31.9	30.029	20	59.76	46.64	0.3904	0.592	19.18
288	32	30.024	20	59.8	46.66	0.3912	0.5933	19.31
289	31.9	30.028	20	59.78	46.66	0.3911	0.5928	19.25
290	32	30.022	20	59.77	46.65	0.3907	0.5922	19.21
291	32	30.015	20	59.76	46.64	0.3908	0.5922	19.2
292	32	30.001	20	59.79	46.65	0.3911	0.5929	19.33
293	32	30.025	20	59.78	46.65	0.3908	0.5925	19.25
294	32	30.024	20	59.75	46.64	0.3905	0.5919	19.16
295	32	29.999	20	59.75	46.62	0.3903	0.5915	19.2
296	32	29.998	20	59.76	46.63	0.3905	0.5919	19.21
297	32	30.015	20	59.78	46.65	0.3909	0.5924	19.27
298	32	30.012	20	59.77	46.64	0.3907	0.5922	19.22
299	32	30.018	20	59.74	46.63	0.3904	0.5919	19.13
300	32	30.008	20	59.75	46.63	0.3905	0.5914	19.19
301	32	29.999	20	59.77	46.64	0.3907	0.5921	19.26
302	31.9	30.028	20	59.78	46.66	0.3909	0.5926	19.25
303	31.9	30.031	20	59.76	46.65	0.3907	0.5921	19.17
304	32	29.997	20	59.75	46.62	0.3906	0.5919	19.21
305	32	30.027	20	59.74	46.63	0.3904	0.5915	19.11
306	32.1	29.967	20	59.71	46.58	0.3928	0.595	19.11
307	32.3	29.923	20	59.66	46.53	0.392	0.5936	19.03
308	32.5	29.844	20	59.63	46.47	0.3892	0.589	19.06
309	32.8	29.779	20	59.57	46.4	0.3888	0.5878	18.98
310	32.9	29.728	20	59.51	46.34	0.389	0.588	18.86
311	33	29.696	20	59.44	46.29	0.3879	0.5858	18.69
312	33.4	29.6	20	59.37	46.19	0.3878	0.5852	18.62
313	33.8	29.458	20	59.24	46.04	0.3873	0.5835	18.46
314	34.2	29.341	20	59.11	45.91	0.3868	0.5818	18.24
315	34.8	29.181	20	58.95	45.73	0.3862	0.58	18.02
316	35.4	29.019	20	58.81	45.56	0.3861	0.5788	17.85
317	36.1	28.831	20	58.61	45.35	0.3856	0.5768	17.57
318	36.8	28.658	20	58.39	45.13	0.3849	0.5744	17.2
319	37.7	28.418	20	58.18	44.88	0.384	0.5716	17
320	38.3	28.258	20	57.98	44.67	0.3833	0.5692	16.68
321	39.3	28.031	20	57.77	44.43	0.3832	0.5676	16.46
322	40.1	27.833	20	57.53	44.18	0.3824	0.5651	16.14
323	41.1	27.623	20	57.26	43.91	0.3815	0.5624	15.77
324	42.1	27.395	20	57.03	43.65	0.3807	0.5594	15.52
325	43	27.211	20	56.79	43.41	0.3799	0.557	15.2
326	43.9	27.019	20	56.59	43.19	0.3795	0.5551	14.99
327	44.9	26.827	20	56.34	42.94	0.3786	0.5521	14.7
328	45.8	26.642	20	56.09	42.69	0.3776	0.5493	14.39
329	46.8	26.467	20	55.85	42.45	0.3768	0.5465	14.1
330	47.7	26.297	20	55.64	42.24	0.3761	0.5444	13.88
331	48.6	26.137	20	55.44	42.03	0.3758	0.5426	13.67
332	49.6	25.975	20	55.23	41.82	0.3749	0.54	13.46
333	50.8	25.778	20	55.01	41.58	0.3738	0.5374	13.28
334	51.4	25.673	20	54.79	41.4	0.3731	0.5351	12.99
335	52.4	25.516	20	54.6	41.19	0.3726	0.5335	12.82
336	53.2	25.398	20	54.43	41.03	0.3722	0.5318	12.65
337	54.3	25.223	20	54.27	40.83	0.3715	0.5299	12.55
338	55	25.123	20	54.08	40.66	0.3708	0.5275	12.34
339	55.7	25.021	20	53.89	40.5	0.3696	0.5254	12.14
340	56.6	24.896	20	53.74	40.34	0.3695	0.524	12.01
341	57.4	24.797	20	53.6	40.2	0.3691	0.5227	11.89
342	58.1	24.699	20	53.43	40.05	0.3684	0.5208	11.73
343	58.8	24.599	20	53.28	39.9	0.3676	0.5189	11.58
344	59.5	24.511	20	53.11	39.76	0.3668	0.517	11.43
345	60.2	24.42	20	53.01	39.64	0.3666	0.5163	11.35
346	60.6	24.37	20	52.9	39.55	0.3663	0.5149	11.24
347	61.4	24.276	20	52.76	39.42	0.3655	0.5135	11.13
348	62.3	24.165	20	52.65	39.29	0.3649	0.5117	11.07
349	62.9	24.097	20	52.51	39.17	0.3643	0.5104	10.94
350	63.6	24.019	20	52.43	39.07	0.3644	0.5098	10.9
351	63.7	24.005	20	52.33	39.01	0.3639	0.5089	10.78
352	64.5	23.913	20	52.23	38.89	0.3634	0.5076	10.71
353	65	23.862	20	52.12	38.8	0.363	0.5064	10.61
354	65.5	23.805	20	52.01	38.71	0.3623	0.5052	10.52
355	66	23.746	20	51.96	38.64	0.3624	0.5051	10.5
356	66.7	23.672	20	51.88	38.55	0.362	0.5039	10.47
357	66.8	23.66	20	51.77	38.49	0.3614	0.5028	10.34
358	67.3	23.61	20	51.68	38.41	0.361	0.5017	10.26
359	68.1	23.53	20	51.58	38.3	0.3608	0.5008	10.2
360	68.3	23.505	20	51.51	38.24	0.3604	0.5	10.13
361	69	23.435	20	51.43	38.15	0.36	0.499	10.09
362	69.6	23.372	20	51.37	38.08	0.3596	0.4981	10.07
363	69.8	23.356	20	51.29	38.03	0.3591	0.4971	9.99
364	70	23.333	20	51.27	38	0.3595	0.4975	9.98
365	70.2	23.313	20	51.2	37.95	0.3591	0.4968	9.91
366	70.9	23.25	20	51.15	37.88	0.3587	0.4959	9.89
367	71	23.234	20	51.08	37.84	0.3585	0.4953	9.83
368	71.4	23.197	20	51.03	37.78	0.3581	0.4946	9.79
369	71.6	23.182	20	51.02	37.77	0.3584	0.4946	9.79
370	71.9	23.15	20	50.96	37.72	0.358	0.494	9.75
371	71.9	23.146	20	50.91	37.68	0.3577	0.4934	9.69
372	72.6	23.084	20	50.86	37.62	0.3574	0.4926	9.68
373	72.7	23.079	20	50.81	37.59	0.3572	0.4923	9.63
374	72.7	23.072	20	50.8	37.58	0.3575	0.4925	9.62
375	73	23.044	20	50.75	37.53	0.3571	0.4919	9.59
376	73.3	23.022	20	50.69	37.49	0.3568	0.4911	9.54
377	73.5	23.002	20	50.65	37.45	0.3565	0.4907	9.51
378	73.9	22.965	20	50.64	37.42	0.3566	0.4905	9.53
379	73.9	22.967	20	50.62	37.41	0.3567	0.4905	9.5
380	74.3	22.926	20	50.59	37.37	0.3563	0.4898	9.5
381	74.5	22.909	20	50.54	37.33	0.3561	0.4894	9.46
382	74.4	22.92	20	50.51	37.32	0.3557	0.4888	9.41
383	74.5	22.91	20	50.48	37.3	0.3558	0.4887	9.39
384	74.9	22.873	20	50.47	37.27	0.3559	0.4887	9.4
385	74.8	22.883	20	50.43	37.25	0.3555	0.4881	9.35
386	75.1	22.859	20	50.4	37.22	0.3552	0.4877	9.33
387	75.3	22.84	20	50.36	37.19	0.355	0.4872	9.31
388	75.3	22.837	20	50.34	37.17	0.3553	0.4874	9.28
389	75.5	22.822	20	50.35	37.17	0.3553	0.4876	9.31
390	75.7	22.801	20	50.3	37.13	0.355	0.4869	9.26
391	75.8	22.792	20	50.26	37.1	0.3549	0.4865	9.23
392	76.2	22.759	20	50.26	37.08	0.3547	0.4861	9.25
393	76.5	22.74	20	50.24	37.06	0.3548	0.4863	9.25
394	76.5	22.74	20	50.25	37.06	0.3548	0.4863	9.26
395	76.7	22.721	20	50.21	37.03	0.3545	0.4857	9.23
396	76.8	22.707	20	50.18	37	0.3543	0.4855	9.2
397	76.9	22.703	20	50.16	36.99	0.3542	0.485	9.19
398	76.8	22.711	20	50.16	36.99	0.3544	0.4854	9.18
399	77.1	22.686	20	50.15	36.97	0.3544	0.4852	9.19
400	77.2	22.679	20	50.1	36.94	0.3541	0.4846	9.14
401	77.5	22.654	20	50.08	36.91	0.354	0.4843	9.13
402	77.3	22.671	20	50.06	36.91	0.3537	0.4839	9.1
403	77.6	22.64	20	50.07	36.9	0.354	0.4844	9.13
404	77.4	22.659	20	50.03	36.89	0.354	0.4844	9.08
405	77.4	22.657	20	50.01	36.88	0.3537	0.4838	9.06
406	77.8	22.625	20	49.99	36.85	0.3535	0.4835	9.07
407	78.1	22.605	20	49.99	36.83	0.3534	0.4832	9.07
408	77.7	22.633	20	49.99	36.85	0.3539	0.4839	9.05
409	77.8	22.627	20	49.98	36.84	0.3538	0.4837	9.05
410	77.8	22.626	20	49.93	36.81	0.3534	0.4833	9
411	78.4	22.573	20	49.92	36.77	0.3533	0.4829	9.03
412	78.3	22.583	20	49.9	36.77	0.3532	0.4826	9
413	78.3	22.587	20	49.91	36.78	0.3536	0.4834	9.01
414	78.6	22.562	20	49.91	36.76	0.3533	0.4829	9.02
415	78.8	22.541	20	49.88	36.73	0.3529	0.4823	9
416	79.1	22.516	20	49.86	36.7	0.3529	0.4819	9.01
417	78.5	22.569	20	49.82	36.72	0.3528	0.4819	8.93
418	78.9	22.533	20	49.85	36.71	0.3531	0.4821	8.98
419	79.3	22.507	20	49.83	36.68	0.3527	0.4818	8.98
420	79	22.532	20	49.8	36.68	0.3526	0.4813	8.93
421	79.1	22.517	20	49.78	36.66	0.3525	0.4811	8.92
422	79.1	22.517	20	49.77	36.66	0.3527	0.4812	8.91
423	79.5	22.489	20	49.78	36.64	0.3529	0.4816	8.94
424	79.5	22.489	20	49.73	36.61	0.3523	0.4806	8.89
425	79.7	22.468	20	49.72	36.59	0.3522	0.4806	8.89
426	79.8	22.467	20	49.72	36.6	0.3524	0.4807	8.89
427	79.8	22.464	20	49.73	36.6	0.3526	0.4809	8.9
428	79.9	22.454	20	49.71	36.58	0.3523	0.4804	8.89
429	80	22.449	20	49.65	36.54	0.352	0.48	8.83
430	80.2	22.435	20	49.65	36.54	0.3521	0.48	8.84
431	80.6	22.401	20	49.66	36.52	0.3523	0.4802	8.88
432	80.5	22.412	20	49.67	36.53	0.3523	0.4805	8.88
433	80.5	22.407	20	49.63	36.51	0.3521	0.4804	8.85
434	80.3	22.427	20	49.59	36.5	0.3518	0.4797	8.79
435	80.4	22.415	20	49.57	36.48	0.3517	0.4796	8.78
436	80.5	22.411	20	49.6	36.49	0.3519	0.48	8.81
437	80.7	22.39	20	49.6	36.48	0.352	0.48	8.82
438	80.7	22.389	20	49.58	36.47	0.3518	0.4796	8.8
439	80.9	22.374	20	49.55	36.44	0.3514	0.479	8.78
440	81.1	22.364	20	49.54	36.43	0.3515	0.4789	8.78
441	81.2	22.355	20	49.56	36.43	0.3519	0.4797	8.81
442	81	22.369	20	49.53	36.43	0.3518	0.4793	8.77
443	81.3	22.346	20	49.51	36.4	0.3514	0.4783	8.77
444	81.1	22.358	20	49.48	36.39	0.3511	0.4779	8.72
445	81.2	22.354	20	49.47	36.39	0.3511	0.4779	8.72
446	81	22.372	20	49.48	36.4	0.3515	0.4786	8.71
447	81.4	22.338	20	49.48	36.38	0.3514	0.4783	8.74
448	81.5	22.331	20	49.46	36.36	0.3511	0.4779	8.72
449	82	22.295	20	49.44	36.33	0.3509	0.4775	8.73
450	81.6	22.321	20	49.43	36.34	0.351	0.4775	8.7
451	81.6	22.323	20	49.45	36.36	0.3513	0.4779	8.72
452	81.7	22.316	20	49.43	36.34	0.3511	0.4777	8.7
453	82	22.294	20	49.39	36.3	0.351	0.4774	8.68
454	82	22.291	20	49.38	36.3	0.3507	0.4769	8.67
455	82.3	22.271	20	49.38	36.28	0.3507	0.477	8.68
456	81.9	22.301	20	49.4	36.31	0.3512	0.4775	8.68
457	82.1	22.285	20	49.38	36.29	0.3509	0.4771	8.68
458	82.2	22.275	20	49.36	36.27	0.3506	0.4767	8.66
459	82.8	22.235	20	49.33	36.23	0.3504	0.4764	8.66
460	82.3	22.266	20	49.35	36.26	0.3505	0.4766	8.66
461	82.4	22.264	20	49.35	36.26	0.3509	0.4769	8.66
462	81.9	22.301	20	49.32	36.27	0.3506	0.4768	8.61
463	82.2	22.274	20	49.31	36.24	0.3505	0.4764	8.61
464	82.7	22.241	20	49.29	36.21	0.3503	0.4761	8.62
465	82.5	22.252	20	49.31	36.23	0.3505	0.4763	8.62
466	82.6	22.245	20	49.3	36.22	0.3507	0.4766	8.63
467	82.4	22.259	20	49.29	36.22	0.3505	0.4762	8.6
468	82.3	22.272	20	49.27	36.22	0.3503	0.4759	8.58
469	83.2	22.204	20	49.27	36.18	0.3501	0.4757	8.62
470	82.9	22.227	20	49.27	36.19	0.3504	0.476	8.6
471	82.7	22.239	20	49.28	36.2	0.3504	0.4762	8.6
472	82.8	22.229	20	49.24	36.18	0.3504	0.4759	8.57
473	82.8	22.229	20	49.22	36.17	0.3501	0.4756	8.56
474	83.1	22.208	20	49.2	36.14	0.3499	0.4753	8.55
475	82.9	22.222	20	49.22	36.16	0.3505	0.4757	8.56
476	83	22.217	20	49.23	36.17	0.3504	0.4758	8.58
477	83.2	22.202	20	49.21	36.14	0.3502	0.4756	8.56
478	83.3	22.192	20	49.2	36.13	0.35	0.4752	8.56
479	83.4	22.183	20	49.19	36.12	0.3499	0.475	8.56
480	83.2	22.203	20	49.2	36.14	0.3502	0.4756	8.55
481	83.3	22.192	20	49.21	36.14	0.3501	0.4754	8.57
482	83.4	22.183	20	49.19	36.12	0.35	0.475	8.55
483	83.8	22.16	20	49.18	36.1	0.35	0.4749	8.56
484	83.6	22.172	20	49.15	36.09	0.3497	0.4747	8.52
485	83.7	22.166	20	49.17	36.1	0.3501	0.4752	8.55
486	83.7	22.163	20	49.18	36.1	0.35	0.475	8.57
487	83.4	22.19	20	49.15	36.1	0.3498	0.4747	8.51
488	84.1	22.135	20	49.15	36.07	0.3497	0.4746	8.55
489	83.7	22.161	20	49.14	36.08	0.3501	0.4751	8.53
490	83.7	22.167	20	49.14	36.08	0.35	0.4748	8.52
491	83.8	22.157	20	49.12	36.07	0.3498	0.4745	8.51
492	84.3	22.12	20	49.11	36.04	0.3496	0.4742	8.53
493	83.9	22.15	20	49.09	36.04	0.3495	0.474	8.48
494	84.4	22.112	20	49.14	36.04	0.3498	0.4747	8.55
495	84.2	22.125	20	49.11	36.04	0.3497	0.4745	8.52
496	84.4	22.114	20	49.1	36.02	0.3496	0.4741	8.51
497	84.2	22.124	20	49.07	36.02	0.3494	0.4739	8.48
498	84.6	22.097	20	49.09	36.01	0.3495	0.4741	8.51
499	84.4	22.115	20	49.08	36.02	0.3498	0.4744	8.5
500	84.3	22.12	20	49.07	36.02	0.3496	0.4741	8.49
501	84.2	22.13	20	49.06	36.01	0.3496	0.474	8.47
502	84.6	22.096	20	49.06	35.99	0.3493	0.4737	8.49
503	84.5	22.104	20	49.05	35.99	0.3495	0.4739	8.48
504	84.4	22.11	20	49.06	36	0.3499	0.4743	8.48
505	84.3	22.121	20	49.04	36	0.3495	0.4741	8.46
506	84.7	22.094	20	49.03	35.98	0.3493	0.4736	8.47
507	84.7	22.089	20	49.02	35.96	0.3491	0.4733	8.45
508	84.8	22.084	20	49.03	35.97	0.3494	0.4737	8.47
509	84.7	22.091	20	49.04	35.98	0.3495	0.4739	8.47
510	84.7	22.093	20	49.02	35.97	0.3493	0.4736	8.45
511	84.7	22.088	20	49.01	35.96	0.3492	0.4733	8.44
512	84.7	22.091	20	48.99	35.95	0.3491	0.473	8.43
513	85.2	22.058	20	49.02	35.95	0.3493	0.4734	8.48
514	85	22.071	20	49.02	35.95	0.3494	0.4736	8.47
515	85	22.072	20	49	35.94	0.349	0.4731	8.45
516	84.8	22.084	20	48.98	35.94	0.3491	0.4731	8.42
517	85.1	22.059	20	48.97	35.92	0.349	0.4728	8.43
518	85.2	22.056	20	49	35.93	0.3493	0.4734	8.46
519	85.4	22.043	20	49	35.93	0.3494	0.4735	8.47
520	84.7	22.095	20	48.96	35.94	0.3491	0.4731	8.39
521	85.4	22.039	20	48.97	35.9	0.349	0.4728	8.44
522	85.4	22.038	20	48.97	35.9	0.3488	0.4726	8.44
523	85.3	22.047	20	48.97	35.91	0.3492	0.4731	8.43
524	85.2	22.054	20	48.95	35.91	0.3493	0.4731	8.41
525	85.1	22.063	20	48.93	35.9	0.3488	0.4726	8.39
526	85.7	22.019	20	48.94	35.87	0.3488	0.4725	8.42
527	85.1	22.064	20	48.9	35.89	0.3487	0.4723	8.36
528	85.5	22.037	20	48.95	35.9	0.3491	0.473	8.43
529	85.1	22.06	20	48.94	35.9	0.349	0.4731	8.4
530	85.4	22.041	20	48.92	35.88	0.3487	0.4723	8.39
531	85.4	22.041	20	48.92	35.88	0.3487	0.4723	8.39
532	85.5	22.034	20	48.91	35.87	0.3485	0.4719	8.39

## Sheet: N2-high-2.4-bwd
Colibri Photonics GmbH Ibidi-OPAL	Dezimaltrennzeichen: Komma				spot:	B	gasflow:	high	pumppress:	50 kPa
2016-02-17	1899-12-31 19:18:35				frequency:	2.4 Hz	dir:	bwd	pumpvac:	-50 kPa
tau100 = 21,130 Âµs @ 20 Â°C	tau0 = 59,000 Âµs @ 20 Â°C	f = 0,75			pumpgas:	N2
T-Korr von tau100 = -0,0272 Âµs / Â°C	T-Korr von tau0 = -0,0203 Âµs / Â°C
Freq 1 = 11,993 kHz	Freq 2 = 6,323 kHz
Zeit / s	O2-Gehalt / %-Luft	tau / Âµs	T / Â°C	Phase1 / Â° @ 11,993 kHz	Phase2 / Â° @ 6,323 kHz	Amplitude1 / V p-p	Amplitude2 / V p-p	Signal : Untergrund
1	84.3	22.118	20	49.08	36.02	0.3501	0.4748	8.49
2	84.2	22.128	20	49.08	36.03	0.3503	0.4751	8.49
3	84.4	22.114	20	49.08	36.01	0.3501	0.4747	8.5
4	84.5	22.105	20	49.08	36.01	0.3501	0.4748	8.5
5	84.6	22.095	20	49.08	36	0.3501	0.4748	8.51
6	84.2	22.129	20	49.06	36.02	0.3501	0.4748	8.47
7	84.4	22.113	20	49.08	36.02	0.3503	0.4751	8.5
8	84.6	22.102	20	49.07	36	0.35	0.4747	8.49
9	84.7	22.094	20	49.09	36.01	0.3502	0.4748	8.52
10	84.4	22.111	20	49.07	36.01	0.35	0.4746	8.49
11	84.6	22.098	20	49.05	35.99	0.3501	0.4747	8.47
12	84.6	22.098	20	49.09	36.01	0.3501	0.4747	8.51
13	84.6	22.102	20	49.05	35.99	0.35	0.4745	8.48
14	84.3	22.124	20	49.04	36	0.3504	0.475	8.46
15	84.9	22.08	20	49.05	35.98	0.3499	0.4744	8.5
16	84.3	22.121	20	49.05	36	0.3503	0.4747	8.46
17	84.6	22.1	20	49.05	35.99	0.3501	0.4745	8.48
18	84.9	22.08	20	49.04	35.97	0.3499	0.4745	8.49
19	84.5	22.103	20	49.05	35.99	0.35	0.4747	8.48
20	84.8	22.081	20	49.03	35.97	0.3498	0.4742	8.48
21	84.7	22.094	20	49.05	35.99	0.3501	0.4746	8.48
22	84.8	22.085	20	49.02	35.97	0.3501	0.4744	8.46
23	84.5	22.105	20	49.03	35.98	0.35	0.4745	8.45
24	84.8	22.087	20	49.04	35.97	0.3502	0.4747	8.47
25	85	22.073	20	49.01	35.95	0.3498	0.4741	8.46
26	85	22.072	20	49.05	35.97	0.3501	0.4744	8.5
27	85.1	22.062	20	49.03	35.95	0.3498	0.4742	8.48
28	84.7	22.091	20	49.03	35.98	0.35	0.4745	8.47
29	84.8	22.086	20	49.03	35.97	0.35	0.4745	8.47
30	85.2	22.053	20	49.03	35.95	0.3499	0.4742	8.49
31	84.9	22.079	20	49.02	35.96	0.3501	0.4745	8.46
32	84.8	22.085	20	49.01	35.96	0.3498	0.474	8.44
33	84.8	22.087	20	49.02	35.96	0.3501	0.4744	8.46
34	85	22.068	20	49	35.94	0.3499	0.4741	8.45
35	85	22.07	20	49.01	35.95	0.3497	0.474	8.46
36	84.9	22.077	20	48.97	35.93	0.3494	0.4736	8.42
37	84.9	22.079	20	48.99	35.95	0.3498	0.474	8.44
38	84.9	22.08	20	48.97	35.93	0.3495	0.4736	8.42
39	85	22.068	20	48.98	35.93	0.3495	0.4737	8.43
40	84.8	22.083	20	48.97	35.94	0.3496	0.4737	8.41
41	84.9	22.077	20	48.97	35.93	0.3495	0.4735	8.42
42	85.1	22.062	20	48.99	35.93	0.3498	0.4739	8.44
43	85.1	22.064	20	48.96	35.92	0.3495	0.4734	8.41
44	85.4	22.038	20	48.99	35.91	0.3497	0.4737	8.46
45	85.2	22.057	20	48.97	35.92	0.3496	0.4735	8.43
46	85.1	22.063	20	48.97	35.92	0.3495	0.4736	8.42
47	85.2	22.054	20	48.97	35.92	0.3495	0.4733	8.44
48	85.2	22.058	20	48.95	35.91	0.3493	0.4732	8.41
49	85.3	22.046	20	48.97	35.91	0.3498	0.4737	8.43
50	85.2	22.058	20	48.95	35.91	0.3494	0.4733	8.41
51	85.5	22.033	20	48.96	35.9	0.3495	0.4736	8.44
52	85.2	22.054	20	48.95	35.91	0.3496	0.4736	8.42
53	85.4	22.041	20	48.95	35.9	0.3494	0.4735	8.42
54	85.2	22.055	20	48.97	35.92	0.3496	0.4735	8.43
55	85.5	22.033	20	48.94	35.89	0.3493	0.473	8.42
56	85.5	22.031	20	48.95	35.89	0.3495	0.4735	8.43
57	85.3	22.05	20	48.93	35.89	0.3494	0.4733	8.39
58	85.4	22.04	20	48.93	35.89	0.3494	0.4732	8.41
59	85.1	22.061	20	48.94	35.91	0.3496	0.4735	8.4
60	85.1	22.064	20	48.92	35.9	0.3492	0.4731	8.38
61	85.5	22.036	20	48.97	35.9	0.3496	0.4734	8.44
62	85.4	22.041	20	48.93	35.88	0.3493	0.4731	8.4
63	85.4	22.044	20	48.92	35.88	0.3497	0.4736	8.39
64	85.7	22.02	20	48.91	35.86	0.352	0.4767	8.4
65	86	22.001	20	48.93	35.86	0.3524	0.4769	8.43
66	85.4	22.043	20	48.95	35.9	0.3527	0.4777	8.42
67	85.4	22.039	20	48.93	35.89	0.3507	0.4751	8.4
68	85.2	22.055	20	48.96	35.91	0.3494	0.4734	8.42
69	84.9	22.077	20	48.99	35.94	0.3496	0.4737	8.43
70	84.4	22.112	20	49.03	35.98	0.3497	0.4742	8.45
71	84.3	22.122	20	49.11	36.04	0.3502	0.475	8.52
72	83.6	22.169	20	49.16	36.1	0.3502	0.4756	8.54
73	82.9	22.22	20	49.27	36.19	0.351	0.4768	8.61
74	82.5	22.256	20	49.37	36.27	0.3511	0.4776	8.69
75	81.1	22.36	20	49.46	36.38	0.3517	0.4788	8.7
76	80.3	22.427	20	49.58	36.5	0.3522	0.4801	8.78
77	79.4	22.498	20	49.71	36.61	0.3527	0.4813	8.86
78	78.7	22.556	20	49.88	36.74	0.3535	0.4828	9
79	77.6	22.641	20	49.97	36.85	0.3538	0.484	9.03
80	76.6	22.73	20	50.13	36.99	0.3548	0.486	9.14
81	75.4	22.833	20	50.29	37.14	0.3552	0.4871	9.23
82	74.6	22.899	20	50.43	37.27	0.356	0.4889	9.34
83	73.5	23.005	20	50.61	37.43	0.3566	0.4906	9.46
84	72.5	23.09	20	50.76	37.57	0.3571	0.492	9.56
85	71.2	23.212	20	50.92	37.74	0.3582	0.4942	9.66
86	70.5	23.289	20	51.07	37.87	0.3585	0.4955	9.77
87	69.4	23.398	20	51.23	38.03	0.3595	0.4974	9.88
88	68.5	23.488	20	51.4	38.17	0.36	0.4992	10
89	67.4	23.594	20	51.54	38.32	0.3605	0.5005	10.1
90	66.7	23.672	20	51.71	38.46	0.3615	0.5027	10.24
91	65.5	23.798	20	51.84	38.61	0.3617	0.5037	10.3
92	64.7	23.888	20	52.01	38.76	0.3626	0.506	10.44
93	63.9	23.979	20	52.17	38.91	0.3631	0.5072	10.58
94	63.5	24.028	20	52.3	39.01	0.3637	0.5086	10.71
95	62.5	24.144	20	52.44	39.16	0.3647	0.5108	10.8
96	61.9	24.217	20	52.58	39.28	0.3648	0.5116	10.93
97	61.3	24.295	20	52.73	39.41	0.3657	0.5135	11.07
98	60.1	24.433	20	52.85	39.57	0.3661	0.5148	11.12
99	59.7	24.494	20	52.99	39.68	0.3668	0.5165	11.26
100	58.9	24.588	20	53.11	39.8	0.3673	0.5177	11.34
101	57.9	24.719	20	53.36	40.02	0.3681	0.5204	11.6
102	57.2	24.82	20	53.45	40.14	0.3684	0.5214	11.64
103	56.8	24.867	20	53.59	40.24	0.3693	0.5231	11.81
104	56.1	24.976	20	53.68	40.36	0.3696	0.5241	11.84
105	55.7	25.025	20	53.79	40.45	0.3699	0.525	11.97
106	55.3	25.082	20	53.91	40.55	0.3704	0.5265	12.1
107	54.9	25.136	20	53.99	40.63	0.3706	0.5272	12.18
108	54.2	25.242	20	54.1	40.75	0.3711	0.5286	12.25
109	53.9	25.294	20	54.19	40.83	0.3713	0.5293	12.34
110	53.3	25.382	20	54.27	40.93	0.3718	0.5305	12.4
111	52.9	25.445	20	54.37	41.02	0.372	0.5313	12.49
112	52.6	25.481	20	54.46	41.1	0.3723	0.5323	12.61
113	52	25.574	20	54.53	41.2	0.3728	0.5335	12.64
114	51.8	25.61	20	54.62	41.26	0.3728	0.5338	12.75
115	51.4	25.673	20	54.7	41.35	0.3735	0.5352	12.83
116	51.2	25.701	20	54.77	41.4	0.3735	0.5358	12.91
117	50.8	25.772	20	54.85	41.49	0.3739	0.5367	12.98
118	50.4	25.829	20	54.91	41.56	0.3743	0.5376	13.04
119	50.4	25.838	20	54.99	41.6	0.3743	0.5379	13.16
120	50	25.908	20	55.06	41.69	0.3747	0.539	13.22
121	49.7	25.95	20	55.11	41.74	0.3746	0.5393	13.26
122	49.4	26	20	55.18	41.81	0.3751	0.5404	13.35
123	49.2	26.039	20	55.25	41.87	0.3753	0.5408	13.42
124	49	26.072	20	55.29	41.91	0.3753	0.5413	13.46
125	48.7	26.13	20	55.36	41.99	0.3757	0.5423	13.54
126	48.5	26.161	20	55.39	42.02	0.3756	0.5425	13.55
127	48.1	26.221	20	55.47	42.1	0.3761	0.5435	13.65
128	48.1	26.235	20	55.5	42.12	0.376	0.5436	13.68
129	47.7	26.293	20	55.56	42.19	0.3763	0.5443	13.74
130	47.5	26.34	20	55.61	42.25	0.3765	0.5452	13.78
131	47.4	26.354	20	55.66	42.28	0.3764	0.545	13.86
132	47.1	26.409	20	55.69	42.34	0.3768	0.546	13.86
133	47	26.429	20	55.74	42.37	0.3768	0.5461	13.93
134	46.7	26.475	20	55.77	42.42	0.377	0.5467	13.93
135	46.6	26.493	20	55.82	42.45	0.3773	0.5471	14.01
136	46.5	26.512	20	55.85	42.49	0.3772	0.5474	14.06
137	46.3	26.547	20	55.9	42.53	0.3776	0.5483	14.12
138	46.1	26.592	20	55.92	42.57	0.3776	0.5483	14.1
139	45.9	26.632	20	55.96	42.62	0.378	0.5491	14.14
140	46	26.616	20	56	42.63	0.378	0.5491	14.23
141	45.7	26.665	20	56.02	42.67	0.378	0.5495	14.21
142	45.7	26.67	20	56.06	42.7	0.3781	0.5499	14.3
143	45.5	26.712	20	56.1	42.74	0.3781	0.5501	14.32
144	45.4	26.727	20	56.14	42.77	0.3785	0.5509	14.4
145	45.2	26.761	20	56.16	42.8	0.3785	0.5509	14.38
146	45.1	26.785	20	56.18	42.83	0.3787	0.5514	14.4
147	45	26.809	20	56.21	42.86	0.3785	0.5515	14.45
148	44.8	26.833	20	56.24	42.89	0.3786	0.5517	14.47
149	44.7	26.855	20	56.27	42.92	0.3788	0.5522	14.52
150	44.7	26.867	20	56.31	42.95	0.3788	0.5523	14.58
151	44.4	26.924	20	56.33	42.99	0.3791	0.553	14.56
152	44.5	26.901	20	56.34	42.98	0.379	0.5528	14.6
153	44.4	26.916	20	56.38	43.01	0.3792	0.5533	14.67
154	44.2	26.965	20	56.41	43.06	0.3793	0.5538	14.68
155	44.1	26.98	20	56.44	43.08	0.3793	0.5537	14.71
156	43.8	27.037	20	56.46	43.13	0.3796	0.5546	14.7
157	43.8	27.042	20	56.48	43.14	0.3794	0.5543	14.73
158	43.8	27.051	20	56.53	43.17	0.3798	0.555	14.82
159	43.7	27.066	20	56.53	43.19	0.3797	0.5551	14.82
160	43.7	27.064	20	56.56	43.2	0.3797	0.5551	14.88
161	43.4	27.12	20	56.59	43.25	0.38	0.5559	14.87
162	43.4	27.123	20	56.6	43.26	0.3796	0.5555	14.89
163	43.3	27.139	20	56.66	43.3	0.3801	0.5562	15
164	43.2	27.155	20	56.66	43.31	0.38	0.5564	14.99
165	43.1	27.179	20	56.69	43.34	0.3801	0.5567	15.02
166	43	27.21	20	56.71	43.37	0.3803	0.5571	15.02
167	42.9	27.227	20	56.77	43.41	0.3805	0.5574	15.13
168	42.8	27.253	20	56.76	43.42	0.3804	0.5575	15.09
169	42.7	27.278	20	56.79	43.45	0.3806	0.5579	15.12
170	42.5	27.311	20	56.81	43.48	0.3806	0.5581	15.12
171	42.5	27.301	20	56.83	43.49	0.3806	0.5581	15.17
172	42.3	27.353	20	56.85	43.53	0.3811	0.559	15.17
173	42.4	27.34	20	56.86	43.53	0.3806	0.5587	15.21
174	42.1	27.389	20	56.89	43.57	0.381	0.559	15.21
175	42.2	27.379	20	56.9	43.57	0.3808	0.559	15.24
176	42.1	27.396	20	56.95	43.61	0.3809	0.5594	15.32
177	42	27.422	20	56.95	43.63	0.381	0.5596	15.3
178	41.9	27.438	20	56.97	43.65	0.381	0.5598	15.32
179	41.8	27.461	20	57.01	43.68	0.3815	0.5604	15.37
180	41.7	27.479	20	57	43.69	0.3813	0.5601	15.34
181	41.5	27.52	20	57.03	43.73	0.3816	0.5609	15.35
182	41.6	27.498	20	57.05	43.73	0.3814	0.5605	15.43
183	41.5	27.522	20	57.08	43.76	0.3813	0.5607	15.47
184	41.6	27.514	20	57.1	43.76	0.3814	0.5611	15.52
185	41.4	27.538	20	57.11	43.78	0.3812	0.5607	15.51
186	41.3	27.58	20	57.13	43.82	0.3816	0.5615	15.52
187	41.3	27.573	20	57.15	43.83	0.3814	0.5614	15.57
188	41.1	27.622	20	57.16	43.86	0.3816	0.5617	15.52
189	41.1	27.615	20	57.2	43.87	0.3818	0.5622	15.62
190	41.2	27.589	20	57.22	43.87	0.3817	0.5622	15.72
191	41	27.642	20	57.24	43.91	0.3819	0.5626	15.68
192	40.9	27.66	20	57.23	43.92	0.3816	0.5623	15.64
193	40.9	27.666	20	57.28	43.95	0.3821	0.5631	15.75
194	40.7	27.71	20	57.28	43.98	0.382	0.5632	15.69
195	40.7	27.71	20	57.3	43.99	0.3819	0.5631	15.74
196	40.7	27.712	20	57.35	44.01	0.3823	0.5639	15.86
197	40.5	27.747	20	57.34	44.03	0.382	0.5635	15.8
198	40.5	27.755	20	57.39	44.06	0.3823	0.5641	15.89
199	40.4	27.783	20	57.38	44.07	0.3822	0.564	15.84
200	40.2	27.825	20	57.4	44.11	0.3823	0.5643	15.83
201	40.2	27.815	20	57.42	44.11	0.3823	0.5645	15.88
202	40.2	27.81	20	57.44	44.12	0.3822	0.5645	15.95
203	40	27.86	20	57.46	44.16	0.3824	0.565	15.91
204	39.9	27.884	20	57.46	44.18	0.3823	0.5648	15.9
205	39.9	27.896	20	57.51	44.21	0.3827	0.5655	16.01
206	39.9	27.895	20	57.52	44.22	0.3827	0.5657	16.03
207	39.8	27.909	20	57.54	44.23	0.3826	0.5655	16.05
208	39.7	27.936	20	57.57	44.26	0.3828	0.5659	16.09
209	39.7	27.945	20	57.56	44.26	0.3827	0.566	16.05
210	39.6	27.961	20	57.59	44.29	0.383	0.5666	16.11
211	39.5	27.979	20	57.61	44.31	0.3829	0.5664	16.13
212	39.4	27.993	20	57.64	44.33	0.383	0.5667	16.18
213	39.4	28.003	20	57.66	44.35	0.3829	0.5671	16.23
214	39.3	28.017	20	57.67	44.36	0.3829	0.5668	16.22
215	39.2	28.053	20	57.7	44.4	0.3833	0.5675	16.26
216	39.3	28.038	20	57.7	44.4	0.383	0.5674	16.29
217	39.1	28.085	20	57.74	44.44	0.3832	0.5678	16.31
218	39	28.097	20	57.75	44.46	0.3833	0.5681	16.32
219	38.9	28.123	20	57.77	44.48	0.3834	0.5681	16.35
220	38.9	28.12	20	57.81	44.5	0.3835	0.5685	16.43
221	38.9	28.126	20	57.8	44.5	0.3833	0.5686	16.41
222	38.7	28.165	20	57.83	44.54	0.3837	0.569	16.43
223	38.7	28.166	20	57.84	44.55	0.3835	0.5688	16.46
224	38.6	28.189	20	57.87	44.57	0.3838	0.5694	16.49
225	38.6	28.204	20	57.89	44.59	0.3838	0.5694	16.53
226	38.4	28.246	20	57.88	44.61	0.3837	0.5694	16.45
227	38.4	28.247	20	57.92	44.64	0.3841	0.5703	16.55
228	38.3	28.275	20	57.91	44.65	0.3838	0.5698	16.48
229	38.2	28.3	20	57.94	44.68	0.3842	0.5705	16.54
230	38.2	28.3	20	57.96	44.69	0.384	0.5703	16.59
231	38.1	28.327	20	57.97	44.71	0.384	0.5704	16.56
232	38.1	28.307	20	58	44.72	0.3842	0.5709	16.68
233	37.9	28.359	20	58.04	44.77	0.3842	0.5712	16.7
234	38	28.337	20	58.03	44.75	0.3841	0.571	16.72
235	37.8	28.396	20	58.06	44.8	0.3842	0.5715	16.69
236	37.7	28.406	20	58.07	44.81	0.3845	0.5717	16.72
237	37.7	28.417	20	58.07	44.82	0.3842	0.5716	16.71
238	37.7	28.408	20	58.11	44.83	0.3844	0.5718	16.81
239	37.7	28.42	20	58.1	44.83	0.3843	0.5714	16.77
240	37.6	28.432	20	58.12	44.85	0.3846	0.5723	16.81
241	37.6	28.439	20	58.12	44.86	0.3846	0.5722	16.8
242	37.6	28.444	20	58.12	44.86	0.3846	0.5721	16.81
243	37.6	28.44	20	58.16	44.88	0.3848	0.5725	16.89
244	37.5	28.46	20	58.15	44.89	0.3847	0.5724	16.86
245	37.4	28.484	20	58.19	44.92	0.385	0.5732	16.91
246	37.3	28.516	20	58.17	44.93	0.3848	0.5729	16.83
247	37.4	28.482	20	58.19	44.92	0.3849	0.5732	16.94
248	37.3	28.509	20	58.21	44.95	0.3848	0.5732	16.94
249	37.4	28.504	20	58.21	44.94	0.3848	0.573	16.95
250	37.3	28.513	20	58.24	44.96	0.385	0.5735	17.01
251	37.3	28.53	20	58.22	44.96	0.3849	0.5733	16.94
252	37.2	28.551	20	58.26	45	0.385	0.5736	17.02
253	37.1	28.573	20	58.26	45.01	0.3849	0.5735	16.98
254	37.1	28.57	20	58.27	45.01	0.3848	0.5736	17.01
255	37.1	28.557	20	58.3	45.02	0.3851	0.5741	17.1
256	37	28.585	20	58.29	45.03	0.3849	0.5737	17.03
257	37	28.599	20	58.31	45.05	0.3852	0.5742	17.07
258	36.9	28.611	20	58.31	45.06	0.385	0.5741	17.06
259	36.9	28.62	20	58.31	45.06	0.3852	0.5744	17.06
260	36.9	28.615	20	58.34	45.08	0.3853	0.5747	17.14
261	36.9	28.633	20	58.35	45.09	0.3853	0.5749	17.13
262	36.8	28.65	20	58.38	45.12	0.3856	0.5751	17.18
263	36.7	28.673	20	58.35	45.11	0.3853	0.5748	17.07
264	36.7	28.667	20	58.39	45.13	0.3855	0.5753	17.19
265	36.7	28.681	20	58.4	45.15	0.3855	0.5752	17.2
266	36.7	28.674	20	58.4	45.14	0.3855	0.5753	17.22
267	36.6	28.698	20	58.41	45.16	0.3855	0.5755	17.2
268	36.6	28.704	20	58.41	45.17	0.3853	0.5751	17.2
269	36.5	28.725	20	58.44	45.19	0.3857	0.5757	17.24
270	36.6	28.709	20	58.44	45.18	0.3854	0.5756	17.27
271	36.5	28.712	20	58.44	45.19	0.3855	0.5756	17.27
272	36.4	28.744	20	58.45	45.21	0.3856	0.5759	17.25
273	36.4	28.737	20	58.44	45.2	0.3854	0.5756	17.23
274	36.5	28.733	20	58.47	45.22	0.3857	0.5761	17.33
275	36.4	28.757	20	58.48	45.23	0.3855	0.5758	17.31
276	36.4	28.756	20	58.5	45.24	0.3859	0.5766	17.37
277	36.4	28.749	20	58.51	45.25	0.3859	0.5764	17.42
278	36.4	28.761	20	58.57	45.29	0.3877	0.5794	17.56
279	36.2	28.812	20	58.66	45.36	0.3904	0.5839	17.74
280	36.2	28.808	20	58.66	45.36	0.3903	0.5838	17.74
281	36.1	28.834	20	58.69	45.39	0.3906	0.5842	17.79
282	36	28.86	20	58.69	45.41	0.3904	0.5839	17.75
283	36.1	28.818	20	58.72	45.39	0.3905	0.5841	17.89
284	36	28.856	20	58.73	45.42	0.3906	0.5845	17.87
285	35.9	28.871	20	58.72	45.43	0.3905	0.5844	17.82
286	36	28.862	20	58.76	45.45	0.3907	0.5848	17.96
287	35.8	28.91	20	58.75	45.47	0.3906	0.5847	17.84
288	35.8	28.917	20	58.78	45.49	0.3912	0.5857	17.91
289	35.7	28.925	20	58.78	45.49	0.3907	0.585	17.92
290	35.7	28.935	20	58.8	45.51	0.3911	0.5856	17.95
291	35.6	28.976	20	58.81	45.54	0.3909	0.5856	17.93
292	35.6	28.967	20	58.86	45.56	0.3911	0.5859	18.07
293	35.6	28.967	20	58.85	45.55	0.3907	0.5855	18.04
294	35.5	29.003	20	58.88	45.59	0.391	0.5861	18.07
295	35.4	29.025	20	58.89	45.61	0.3912	0.5866	18.07
296	35.4	29.023	20	58.89	45.61	0.391	0.586	18.08
297	35.4	29.02	20	58.91	45.61	0.3913	0.5866	18.14
298	35.3	29.043	20	58.9	45.63	0.3909	0.5862	18.09
299	35.2	29.07	20	58.93	45.66	0.3911	0.5866	18.14
300	35.3	29.056	20	58.94	45.65	0.3913	0.5867	18.18
301	35.2	29.074	20	58.94	45.66	0.3911	0.5866	18.15
302	35.2	29.062	20	58.96	45.67	0.3914	0.5871	18.22
303	35.2	29.074	20	58.94	45.67	0.391	0.5865	18.16
304	35.1	29.103	20	58.95	45.69	0.3913	0.5871	18.14
305	35.2	29.085	20	58.94	45.67	0.3912	0.5867	18.13
306	35.2	29.062	20	58.96	45.67	0.3912	0.5865	18.23
307	35.4	29.017	20	58.9	45.61	0.3912	0.5864	18.12
308	35.5	28.989	20	58.86	45.57	0.3908	0.5855	18.05
309	35.9	28.896	20	58.79	45.48	0.3908	0.5852	17.99
310	36.2	28.806	20	58.68	45.37	0.3904	0.5836	17.81
311	36.6	28.695	20	58.6	45.26	0.3902	0.5829	17.74
312	37.1	28.581	20	58.45	45.11	0.3899	0.5813	17.49
313	37.7	28.427	20	58.3	44.94	0.3891	0.5794	17.3
314	38.2	28.286	20	58.14	44.77	0.3888	0.5779	17.06
315	38.9	28.119	20	57.97	44.59	0.3884	0.5761	16.87
316	39.6	27.96	20	57.8	44.4	0.388	0.5743	16.64
317	40.4	27.766	20	57.59	44.18	0.3872	0.5718	16.38
318	41.1	27.606	20	57.38	43.97	0.3867	0.5698	16.08
319	41.9	27.431	20	57.19	43.76	0.3859	0.5675	15.84
320	42.7	27.272	20	56.97	43.54	0.3851	0.5651	15.53
321	43.6	27.092	20	56.77	43.33	0.3847	0.5631	15.31
322	44.5	26.902	20	56.57	43.11	0.3837	0.5604	15.11
323	45.2	26.757	20	56.35	42.9	0.3833	0.5584	14.81
324	46.2	26.581	20	56.14	42.68	0.3824	0.5559	14.57
325	47	26.431	20	55.93	42.48	0.3817	0.5538	14.32
326	47.9	26.267	20	55.76	42.28	0.3812	0.5518	14.15
327	48.9	26.094	20	55.54	42.06	0.3802	0.5492	13.92
328	49.7	25.946	20	55.36	41.87	0.38	0.5475	13.75
329	50.5	25.82	20	55.17	41.69	0.3789	0.545	13.52
330	51.4	25.671	20	55	41.51	0.3788	0.5439	13.38
331	52	25.571	20	54.83	41.35	0.3778	0.5416	13.16
332	52.9	25.442	20	54.64	41.17	0.3772	0.5395	12.98
333	53.6	25.333	20	54.5	41.02	0.3767	0.538	12.84
334	54.3	25.234	20	54.31	40.86	0.3758	0.5356	12.62
335	55	25.13	20	54.18	40.72	0.3755	0.5345	12.5
336	56.1	24.97	20	54.04	40.55	0.3747	0.5327	12.43
337	56.5	24.92	20	53.89	40.43	0.3742	0.531	12.23
338	57	24.84	20	53.76	40.32	0.3739	0.5299	12.11
339	57.9	24.718	20	53.61	40.16	0.3731	0.528	11.99
340	58.4	24.657	20	53.51	40.07	0.3728	0.5271	11.9
341	59.1	24.563	20	53.39	39.94	0.3721	0.5253	11.8
342	59.6	24.496	20	53.26	39.83	0.372	0.5243	11.67
343	59.9	24.462	20	53.15	39.74	0.3714	0.5232	11.52
344	60.7	24.367	20	53.04	39.62	0.3708	0.5218	11.45
345	61	24.323	20	52.93	39.54	0.3705	0.521	11.33
346	61.9	24.217	20	52.84	39.42	0.37	0.5195	11.31
347	62.3	24.169	20	52.77	39.35	0.37	0.5191	11.24
348	62.5	24.15	20	52.66	39.28	0.3695	0.5179	11.1
349	62.9	24.095	20	52.58	39.2	0.3691	0.5168	11.03
350	63.6	24.021	20	52.52	39.12	0.3688	0.5161	11.02
351	63.9	23.979	20	52.43	39.05	0.3683	0.5149	10.93
352	64.4	23.924	20	52.37	38.98	0.3683	0.5147	10.9
353	64.9	23.871	20	52.29	38.9	0.3679	0.5136	10.84
354	65.2	23.835	20	52.22	38.84	0.3677	0.5131	10.77
355	65.3	23.83	20	52.15	38.8	0.3674	0.5123	10.69
356	66	23.752	20	52.1	38.72	0.367	0.5114	10.68
357	66.4	23.71	20	51.98	38.63	0.3663	0.5101	10.56
358	66.6	23.686	20	51.93	38.59	0.3664	0.5098	10.52
359	67.1	23.635	20	51.87	38.52	0.366	0.509	10.49
360	67.3	23.604	20	51.83	38.48	0.3659	0.5085	10.46
361	67.7	23.57	20	51.79	38.44	0.3658	0.5082	10.43
362	67.7	23.57	20	51.72	38.4	0.3654	0.5073	10.34
363	68.1	23.523	20	51.71	38.36	0.3655	0.5074	10.36
364	68.4	23.496	20	51.64	38.31	0.365	0.5068	10.3
365	68.8	23.454	20	51.62	38.27	0.3651	0.5064	10.32
366	68.8	23.459	20	51.58	38.25	0.3648	0.5058	10.26
367	69	23.433	20	51.54	38.21	0.3645	0.5053	10.23
368	69.2	23.41	20	51.51	38.18	0.3645	0.5051	10.21
369	69.2	23.413	20	51.45	38.15	0.3642	0.5042	10.13
370	69.4	23.39	20	51.43	38.13	0.3642	0.5043	10.13
371	70	23.33	20	51.4	38.07	0.364	0.5039	10.15
372	69.8	23.357	20	51.38	38.07	0.3638	0.5036	10.09
373	70.1	23.32	20	51.35	38.04	0.3639	0.5034	10.08
374	70.3	23.305	20	51.3	38	0.3634	0.5028	10.03
375	70.7	23.269	20	51.3	37.98	0.3636	0.5029	10.07
376	70.8	23.251	20	51.27	37.95	0.3633	0.5023	10.04
377	70.8	23.26	20	51.24	37.94	0.3634	0.5023	10
378	71.1	23.229	20	51.2	37.89	0.3633	0.5018	9.97
379	71	23.233	20	51.17	37.88	0.3629	0.5011	9.94
380	71.2	23.221	20	51.18	37.88	0.3631	0.5014	9.95
381	71.3	23.212	20	51.13	37.85	0.3627	0.5007	9.91
382	71.4	23.2	20	51.12	37.83	0.363	0.501	9.9
383	71.9	23.148	20	51.1	37.79	0.3627	0.5005	9.92
384	71.9	23.149	20	51.07	37.77	0.3626	0.5003	9.88
385	72.1	23.132	20	51.05	37.75	0.3625	0.5002	9.88
386	72	23.137	20	51.03	37.75	0.3623	0.4997	9.85
387	72	23.144	20	51.01	37.74	0.3625	0.4998	9.82
388	72.5	23.093	20	51	37.7	0.3622	0.4994	9.84
389	72.2	23.119	20	50.96	37.69	0.3621	0.4991	9.78
390	72.3	23.11	20	50.94	37.68	0.3619	0.4988	9.76
391	72.3	23.11	20	50.93	37.67	0.362	0.4988	9.74
392	72.9	23.052	20	50.93	37.63	0.3621	0.4989	9.79
393	72.9	23.059	20	50.89	37.62	0.3617	0.4982	9.74
394	72.9	23.052	20	50.88	37.61	0.3619	0.4984	9.73
395	73	23.047	20	50.87	37.6	0.3617	0.498	9.73
396	73	23.052	20	50.84	37.58	0.3616	0.498	9.68
397	73.4	23.009	20	50.84	37.56	0.3617	0.4978	9.73
398	73.6	22.992	20	50.8	37.53	0.3614	0.4974	9.69
399	73.5	23.002	20	50.81	37.54	0.3616	0.4977	9.69
400	73.6	22.992	20	50.78	37.51	0.3611	0.497	9.66
401	73.7	22.983	20	50.77	37.5	0.3614	0.4973	9.66
402	73.8	22.973	20	50.75	37.49	0.3613	0.4971	9.65
403	73.8	22.972	20	50.73	37.47	0.3611	0.4968	9.62
404	73.7	22.979	20	50.72	37.47	0.3613	0.4967	9.6
405	74	22.957	20	50.72	37.46	0.3609	0.4963	9.62
406	74	22.952	20	50.72	37.45	0.3612	0.4966	9.62
407	74.3	22.932	20	50.7	37.43	0.3609	0.496	9.62
408	74.6	22.906	20	50.67	37.4	0.3609	0.4961	9.61
409	74.4	22.924	20	50.67	37.41	0.3609	0.4961	9.59
410	74.4	22.919	20	50.65	37.39	0.3605	0.4954	9.57
411	74.7	22.894	20	50.66	37.39	0.3608	0.4958	9.61
412	74.7	22.895	20	50.61	37.36	0.3606	0.4954	9.55
413	74.4	22.921	20	50.6	37.37	0.3607	0.4955	9.52
414	74.9	22.878	20	50.61	37.34	0.3607	0.4956	9.55
415	74.8	22.884	20	50.58	37.33	0.3604	0.4949	9.51
416	74.7	22.892	20	50.57	37.33	0.3605	0.4949	9.5
417	75	22.869	20	50.55	37.31	0.3602	0.4945	9.49
418	75.1	22.857	20	50.55	37.3	0.3603	0.4949	9.5
419	75	22.868	20	50.54	37.3	0.3602	0.4945	9.48
420	75.1	22.855	20	50.52	37.28	0.3601	0.4944	9.47
421	75.5	22.825	20	50.5	37.25	0.3601	0.4943	9.48
422	75.3	22.844	20	50.49	37.26	0.3601	0.494	9.45
423	75.8	22.799	20	50.49	37.23	0.3598	0.4939	9.48
424	75.8	22.801	20	50.49	37.23	0.36	0.494	9.48
425	75.9	22.789	20	50.46	37.21	0.3599	0.4938	9.45
426	75.7	22.805	20	50.46	37.22	0.3599	0.4934	9.45
427	75.7	22.803	20	50.44	37.21	0.3599	0.4937	9.42
428	75.9	22.786	20	50.43	37.19	0.3596	0.4933	9.43
429	76	22.781	20	50.43	37.19	0.3599	0.4936	9.43
430	75.8	22.796	20	50.4	37.18	0.3596	0.4932	9.38
431	76	22.777	20	50.4	37.16	0.3598	0.4931	9.39
432	76.2	22.766	20	50.4	37.16	0.3597	0.4932	9.4
433	76.3	22.752	20	50.36	37.13	0.3595	0.4927	9.37
434	76.4	22.741	20	50.38	37.13	0.3596	0.4931	9.4
435	76.5	22.736	20	50.35	37.11	0.3594	0.4925	9.37
436	76.9	22.702	20	50.36	37.1	0.3595	0.4926	9.41
437	76.4	22.743	20	50.35	37.12	0.3594	0.4926	9.37
438	76.4	22.743	20	50.32	37.1	0.3593	0.4924	9.33
439	76.3	22.753	20	50.31	37.1	0.3595	0.4926	9.31
440	76.6	22.732	20	50.3	37.08	0.3591	0.4919	9.32
441	76.6	22.726	20	50.3	37.08	0.3594	0.4922	9.32
442	77	22.691	20	50.3	37.05	0.3593	0.4919	9.35
443	76.5	22.737	20	50.29	37.08	0.3592	0.492	9.3
444	76.8	22.708	20	50.28	37.06	0.3592	0.492	9.31
445	77.1	22.686	20	50.26	37.03	0.3589	0.4915	9.31
446	77	22.693	20	50.26	37.04	0.3591	0.4918	9.31
447	76.7	22.72	20	50.24	37.04	0.3589	0.4914	9.26
448	76.8	22.71	20	50.24	37.04	0.3589	0.4916	9.27
449	76.7	22.718	20	50.22	37.03	0.359	0.4914	9.24
450	77.3	22.671	20	50.22	37	0.3589	0.4911	9.27
451	77.3	22.671	20	50.23	37	0.359	0.4914	9.29
452	77.5	22.655	20	50.21	36.98	0.3587	0.4909	9.28
453	77.2	22.673	20	50.2	36.99	0.3589	0.4911	9.25
454	77.4	22.663	20	50.18	36.97	0.3588	0.491	9.24
455	77.7	22.635	20	50.18	36.96	0.3586	0.4908	9.26
456	77.7	22.637	20	50.19	36.96	0.3587	0.4908	9.27
457	77.5	22.65	20	50.15	36.95	0.3586	0.4906	9.22
458	77.5	22.652	20	50.17	36.96	0.3589	0.4909	9.24
459	77.7	22.633	20	50.14	36.93	0.3586	0.4903	9.22
460	77.7	22.631	20	50.15	36.93	0.3586	0.4904	9.23
461	77.8	22.628	20	50.13	36.92	0.3584	0.4904	9.21
462	77.9	22.615	20	50.12	36.91	0.3584	0.4902	9.21
463	77.7	22.634	20	50.12	36.92	0.3586	0.4905	9.19
464	77.8	22.626	20	50.1	36.9	0.3585	0.4902	9.18
465	77.9	22.62	20	50.12	36.91	0.3587	0.4905	9.2
466	78.1	22.598	20	50.1	36.89	0.3585	0.4901	9.2
467	78.1	22.601	20	50.09	36.89	0.3584	0.4901	9.19
468	78.1	22.603	20	50.1	36.89	0.3585	0.4902	9.19
469	78.3	22.585	20	50.08	36.87	0.3583	0.4899	9.19
470	78.3	22.586	20	50.09	36.88	0.3586	0.4901	9.2
471	78.3	22.583	20	50.07	36.86	0.3581	0.4895	9.18
472	78.2	22.592	20	50.07	36.87	0.3584	0.4898	9.17
473	78.5	22.57	20	50.06	36.85	0.3584	0.4896	9.18
474	78.4	22.58	20	50.05	36.85	0.3581	0.4893	9.16
475	78.5	22.57	20	50.03	36.83	0.3583	0.4898	9.15
476	78.6	22.561	20	50.03	36.82	0.358	0.4892	9.15
477	78.5	22.568	20	50.03	36.83	0.3584	0.4896	9.15
478	78.8	22.543	20	50.01	36.8	0.358	0.4892	9.14
479	78.5	22.568	20	50.01	36.82	0.3582	0.4893	9.12
480	78.3	22.583	20	49.99	36.82	0.3582	0.4894	9.1
481	78.8	22.545	20	49.99	36.79	0.3578	0.4888	9.12
482	78.8	22.547	20	50	36.8	0.358	0.4893	9.13
483	78.9	22.537	20	49.98	36.78	0.3579	0.4888	9.12
484	78.9	22.538	20	49.99	36.79	0.358	0.489	9.13
485	79	22.527	20	49.98	36.77	0.358	0.4888	9.12
486	79.2	22.513	20	49.96	36.76	0.3578	0.4885	9.11
487	79.2	22.514	20	49.97	36.76	0.3579	0.4887	9.13
488	79.2	22.514	20	49.95	36.75	0.3579	0.4885	9.1
489	79.1	22.517	20	49.93	36.74	0.3578	0.4883	9.08
490	79.2	22.514	20	49.94	36.75	0.3576	0.4883	9.1
491	79.2	22.512	20	49.93	36.74	0.3576	0.4884	9.08
492	79.2	22.511	20	49.93	36.74	0.3576	0.488	9.08
493	79.1	22.524	20	49.92	36.74	0.3576	0.4881	9.07
494	79.4	22.494	20	49.89	36.7	0.3576	0.4879	9.05
495	79.2	22.508	20	49.9	36.72	0.3576	0.4882	9.05
496	79.3	22.5	20	49.9	36.71	0.3575	0.4879	9.06
497	79.6	22.482	20	49.89	36.7	0.3575	0.488	9.06
498	79.4	22.495	20	49.88	36.7	0.3576	0.4878	9.04
499	79.6	22.477	20	49.88	36.69	0.3574	0.4877	9.05
500	79.7	22.468	20	49.88	36.68	0.3577	0.488	9.06
501	79.2	22.51	20	49.86	36.7	0.3573	0.4877	9.01
502	79.7	22.47	20	49.86	36.67	0.3574	0.4876	9.04
503	79.7	22.468	20	49.86	36.67	0.3573	0.4875	9.04
504	79.7	22.47	20	49.85	36.67	0.3571	0.4873	9.03
505	79.9	22.452	20	49.85	36.66	0.3575	0.4877	9.04
506	79.7	22.468	20	49.82	36.65	0.3571	0.487	8.99
507	79.9	22.457	20	49.83	36.65	0.3574	0.4875	9.02
508	79.9	22.452	20	49.83	36.64	0.3573	0.4873	9.01
509	79.7	22.468	20	49.81	36.65	0.3571	0.487	8.99
510	80.2	22.43	20	49.81	36.62	0.3573	0.4871	9.02
511	80.2	22.433	20	49.81	36.62	0.357	0.4868	9.01
512	80.2	22.429	20	49.81	36.62	0.3572	0.4872	9.02
513	80.2	22.434	20	49.78	36.61	0.357	0.4867	8.98
514	80.1	22.441	20	49.78	36.61	0.3571	0.4869	8.98
515	80.2	22.435	20	49.78	36.6	0.3571	0.487	8.98
516	80.4	22.417	20	49.77	36.59	0.3568	0.4865	8.98
517	80.4	22.412	20	49.8	36.6	0.3571	0.4871	9.01
518	80.4	22.417	20	49.76	36.58	0.3569	0.4865	8.97
519	80.4	22.416	20	49.76	36.58	0.357	0.4868	8.97
520	80.3	22.424	20	49.76	36.59	0.3569	0.4866	8.96
521	80.4	22.413	20	49.75	36.57	0.3568	0.4862	8.96
522	80.4	22.417	20	49.73	36.57	0.3568	0.4863	8.94
523	80.8	22.383	20	49.73	36.54	0.3567	0.4861	8.97
524	80.4	22.419	20	49.74	36.57	0.357	0.4863	8.94
525	80.5	22.407	20	49.72	36.56	0.3566	0.4862	8.94
526	80.2	22.428	20	49.71	36.57	0.3566	0.486	8.91
527	80.9	22.374	20	49.71	36.53	0.3565	0.4861	8.95
528	80.7	22.393	20	49.7	36.53	0.3567	0.4859	8.92
529	80.7	22.393	20	49.7	36.54	0.3566	0.486	8.93
