# Supplementary material for: Design, characterization, and modeling of microcirculation systems with integrated oxygenators
Source: Copernicus journal article supplement (doi:10.5194/jsss-5-221-2016), 2016-06-24
Supplement: Supplementary file 2 [file O2-Vorversuch-27.01.2016.xls]

## Sheet: OxyDeoxyVoaygerChip
Voyager-Chip-Oxy-Deoxy
Colibri Photonics GmbH Ibidi-OPAL	Dezimaltrennzeichen: Komma
2016-01-27	1899-12-31 18:05:11
tau100 = 21,000 Âµs @ 20 Â°C	tau0 = 59,000 Âµs @ 20 Â°C	f = 0,75
T-Korr von tau100 = -0,0272 Âµs / Â°C	T-Korr von tau0 = -0,0203 Âµs / Â°C
Freq 1 = 11,993 kHz	Freq 2 = 6,323 kHz
Zeit / s	O2-Gehalt / %-Luft	tau / Âµs	T / Â°C	Phase1 / Â° @ 11,993 kHz	Phase2 / Â° @ 6,323 kHz	Amplitude1 / V p-p	Amplitude2 / V p-p	Signal : Untergrund
1	23.1	33.166	20	60.06	48.5	0.4457	0.6929	16.49
2	23.1	33.16	20	60.07	48.49	0.446	0.693	16.51
3	23.1	33.171	20	60.07	48.5	0.4458	0.693	16.5
4	23.1	33.169	20	60.07	48.5	0.4458	0.693	16.52
5	23.1	33.161	20	60.07	48.5	0.446	0.6933	16.52
6	23	33.182	20	60.09	48.52	0.4459	0.6934	16.55
7	23	33.194	20	60.1	48.53	0.446	0.6936	16.56
8	23	33.214	20	60.1	48.54	0.4461	0.6936	16.55
9	23	33.195	20	60.11	48.54	0.446	0.6936	16.58
10	22.9	33.227	20	60.12	48.56	0.4461	0.6936	16.58
11	23	33.222	20	60.11	48.55	0.446	0.6938	16.56
12	22.9	33.259	20	60.14	48.59	0.4464	0.6943	16.6
13	23	33.214	20	60.15	48.57	0.4464	0.6943	16.65
14	22.9	33.254	20	60.15	48.59	0.4464	0.6944	16.63
15	22.8	33.286	20	60.16	48.61	0.4466	0.695	16.62
16	22.9	33.25	20	60.17	48.6	0.4471	0.6957	16.67
17	22.8	33.281	20	60.18	48.62	0.4472	0.6959	16.66
18	22.8	33.29	20	60.18	48.62	0.4473	0.6961	16.65
19	22.8	33.308	20	60.21	48.65	0.4488	0.6985	16.7
20	22.8	33.306	20	60.18	48.63	0.4489	0.6987	16.64
21	22.8	33.309	20	60.18	48.63	0.4502	0.7008	16.64
22	22.9	33.267	20	60.19	48.62	0.4486	0.6981	16.71
23	22.8	33.297	20	60.18	48.62	0.449	0.6987	16.64
24	22.8	33.308	20	60.15	48.62	0.4492	0.6991	16.59
25	22.8	33.276	20	60.14	48.59	0.4485	0.6977	16.57
26	22.9	33.264	20	60.17	48.6	0.4465	0.6944	16.65
27	23	33.202	20	60.14	48.56	0.4463	0.6942	16.64
28	23	33.19	20	60.13	48.54	0.4465	0.6945	16.62
29	23.1	33.165	20	60.1	48.52	0.4466	0.6943	16.58
30	23.1	33.153	20	60.08	48.5	0.4464	0.6939	16.53
31	23.3	33.073	20	60.03	48.43	0.4463	0.6936	16.5
32	23.4	33.005	20	59.98	48.37	0.4463	0.6927	16.44
33	23.7	32.89	20	59.91	48.27	0.4461	0.692	16.39
34	23.9	32.768	20	59.82	48.16	0.4458	0.6909	16.29
35	24.2	32.651	20	59.7	48.04	0.4454	0.6896	16.11
36	24.6	32.463	20	59.57	47.87	0.4455	0.6884	15.99
37	25.1	32.283	20	59.43	47.7	0.4448	0.6862	15.83
38	25.6	32.052	20	59.26	47.49	0.4443	0.6841	15.66
39	26.1	31.851	20	59.09	47.29	0.4439	0.6821	15.46
40	26.7	31.627	20	58.89	47.06	0.4436	0.6802	15.24
41	27.3	31.378	20	58.67	46.81	0.443	0.6773	15.01
42	28	31.119	20	58.49	46.57	0.4426	0.6749	14.84
43	28.7	30.88	20	58.24	46.31	0.4418	0.672	14.57
44	29.5	30.595	20	58.02	46.03	0.441	0.6692	14.37
45	30.2	30.339	20	57.8	45.77	0.4401	0.6662	14.15
46	30.9	30.11	20	57.54	45.51	0.4395	0.6633	13.88
47	31.9	29.818	20	57.31	45.22	0.4383	0.6599	13.69
48	32.5	29.624	20	57.07	44.98	0.4375	0.6566	13.42
49	33.4	29.342	20	56.84	44.7	0.4367	0.6536	13.25
50	34.3	29.098	20	56.6	44.43	0.4359	0.6506	13.03
51	35	28.893	20	56.36	44.18	0.4353	0.6479	12.79
52	35.9	28.643	20	56.11	43.9	0.4346	0.6452	12.58
53	36.7	28.448	20	55.9	43.67	0.4342	0.643	12.39
54	37.6	28.227	20	55.67	43.42	0.4333	0.6399	12.2
55	38.3	28.037	20	55.46	43.2	0.4321	0.6366	12.02
56	40	27.645	20	55.01	42.72	0.4307	0.6314	11.65
57	40.8	27.467	20	54.8	42.5	0.43	0.629	11.49
58	41.7	27.268	20	54.6	42.28	0.4291	0.6262	11.35
59	42.3	27.137	20	54.41	42.09	0.4282	0.6238	11.17
60	43.2	26.958	20	54.21	41.88	0.4277	0.6219	11.03
61	43.8	26.827	20	54.02	41.7	0.4275	0.6201	10.88
62	44.7	26.653	20	53.84	41.49	0.4264	0.6171	10.76
63	45.3	26.536	20	53.66	41.32	0.4258	0.615	10.61
64	46.2	26.377	20	53.5	41.14	0.4252	0.6131	10.52
65	46.9	26.232	20	53.35	40.97	0.4246	0.6113	10.42
66	47.3	26.169	20	53.18	40.84	0.424	0.6093	10.26
67	48.2	26.016	20	53.01	40.65	0.4233	0.6075	10.16
68	48.8	25.904	20	52.87	40.51	0.4229	0.6058	10.06
69	49.5	25.788	20	52.73	40.36	0.4223	0.6039	9.98
70	50	25.699	20	52.6	40.23	0.4217	0.6024	9.88
71	50.8	25.576	20	52.47	40.09	0.4213	0.601	9.81
72	51.3	25.487	20	52.34	39.96	0.4209	0.5995	9.72
73	52	25.389	20	52.21	39.83	0.4204	0.5979	9.64
74	52.4	25.321	20	52.08	39.72	0.4204	0.597	9.54
75	53.1	25.215	20	51.97	39.59	0.4197	0.5954	9.49
76	53.6	25.145	20	51.84	39.48	0.4191	0.5938	9.39
77	54.2	25.049	20	51.76	39.38	0.4186	0.5924	9.36
78	54.5	25.009	20	51.64	39.28	0.4181	0.5911	9.26
79	55.1	24.924	20	51.54	39.18	0.4182	0.5907	9.21
80	55.4	24.882	20	51.46	39.1	0.4175	0.5888	9.15
81	56	24.802	20	51.37	39	0.4169	0.5877	9.1
82	56.6	24.714	20	51.27	38.9	0.4166	0.5863	9.05
83	56.9	24.669	20	51.18	38.82	0.4162	0.5855	8.98
84	57.3	24.615	20	51.08	38.73	0.4157	0.5842	8.92
85	57.7	24.567	20	50.99	38.65	0.4154	0.583	8.86
86	58.2	24.502	20	50.91	38.57	0.415	0.5822	8.82
87	58.8	24.416	20	50.83	38.47	0.4147	0.5811	8.78
88	59.1	24.383	20	50.76	38.41	0.4153	0.5815	8.74
89	59.3	24.355	20	50.67	38.34	0.4146	0.5802	8.67
90	59.9	24.289	20	50.6	38.26	0.414	0.5786	8.64
91	60.2	24.249	20	50.52	38.19	0.4134	0.5777	8.59
92	60.7	24.18	20	50.46	38.12	0.4132	0.5767	8.57
93	61.2	24.119	20	50.4	38.05	0.4129	0.576	8.55
94	61.7	24.063	20	50.32	37.97	0.4127	0.5751	8.5
95	61.9	24.038	20	50.26	37.92	0.4122	0.5743	8.46
96	62.1	24.021	20	50.19	37.87	0.4122	0.5736	8.41
97	62.5	23.967	20	50.13	37.8	0.4118	0.573	8.38
98	62.9	23.918	20	50.08	37.74	0.4116	0.5722	8.36
99	63	23.907	20	50.01	37.7	0.4114	0.5715	8.31
100	63.6	23.84	20	49.96	37.63	0.411	0.5708	8.29
101	63.5	23.856	20	49.89	37.6	0.411	0.57	8.23
102	64	23.796	20	49.86	37.54	0.4107	0.5695	8.23
103	64.6	23.734	20	49.8	37.47	0.4104	0.5689	8.21
104	64.7	23.717	20	49.75	37.43	0.4102	0.5684	8.17
105	64.9	23.701	20	49.69	37.39	0.41	0.5679	8.14
106	65.4	23.642	20	49.65	37.33	0.4098	0.5672	8.13
107	65.3	23.651	20	49.6	37.31	0.4096	0.5668	8.08
108	65.9	23.593	20	49.54	37.24	0.4097	0.5665	8.06
109	66	23.578	20	49.51	37.21	0.4092	0.5657	8.04
110	66.2	23.553	20	49.44	37.16	0.4092	0.5651	8
111	66.8	23.494	20	49.43	37.12	0.4089	0.5647	8.02
112	66.6	23.51	20	49.37	37.1	0.4086	0.5639	7.96
113	67.2	23.455	20	49.35	37.05	0.4085	0.5636	7.97
114	67.2	23.449	20	49.29	37.01	0.4085	0.5632	7.92
115	67.6	23.409	20	49.27	36.97	0.4083	0.563	7.92
116	67.5	23.422	20	49.22	36.95	0.4081	0.5621	7.88
117	68	23.371	20	49.18	36.9	0.4081	0.5618	7.87
118	68	23.366	20	49.14	36.87	0.4079	0.5614	7.84
119	68.7	23.3	20	49.11	36.82	0.4076	0.561	7.85
120	68.8	23.289	20	49.08	36.79	0.4074	0.5606	7.82
121	68.8	23.283	20	49.04	36.77	0.4073	0.5602	7.8
122	68.8	23.289	20	49	36.75	0.4071	0.5597	7.76
123	69.5	23.213	20	48.93	36.66	0.4067	0.5588	7.75
124	69.5	23.22	20	48.9	36.65	0.4063	0.5582	7.72
125	70	23.171	20	48.89	36.61	0.4061	0.5575	7.73
126	69.7	23.197	20	48.85	36.6	0.4062	0.5576	7.68
127	70	23.165	20	48.81	36.57	0.4058	0.5571	7.67
128	70.4	23.128	20	48.8	36.54	0.4058	0.5566	7.68
129	70.6	23.11	20	48.77	36.51	0.4056	0.5563	7.66
130	70.9	23.082	20	48.75	36.48	0.4054	0.556	7.66
131	70.9	23.079	20	48.69	36.44	0.4053	0.5557	7.62
132	70.9	23.082	20	48.68	36.44	0.4054	0.5555	7.61
133	71.5	23.027	20	48.67	36.4	0.4053	0.5554	7.62
134	71.2	23.05	20	48.63	36.39	0.405	0.555	7.58
135	71.9	22.987	20	48.62	36.34	0.4049	0.5545	7.61
136	71.8	23	20	48.57	36.33	0.4049	0.5542	7.56
137	71.9	22.984	20	48.56	36.31	0.4049	0.5543	7.56
138	72.3	22.953	20	48.55	36.28	0.4051	0.5544	7.57
139	72	22.979	20	48.51	36.28	0.4047	0.5537	7.52
140	72.4	22.94	20	48.51	36.25	0.4045	0.5532	7.54
141	72.5	22.937	20	48.48	36.23	0.4042	0.5529	7.52
142	72.5	22.934	20	48.46	36.22	0.4041	0.5526	7.5
143	72.7	22.912	20	48.44	36.2	0.4042	0.5524	7.5
144	73	22.89	20	48.42	36.17	0.4041	0.5522	7.5
145	73	22.884	20	48.38	36.15	0.4039	0.552	7.47
146	73	22.888	20	48.35	36.14	0.4039	0.5516	7.45
147	73.3	22.864	20	48.35	36.12	0.4037	0.5515	7.45
148	73.7	22.827	20	48.34	36.09	0.4036	0.5513	7.46
149	73.5	22.838	20	48.31	36.08	0.4036	0.551	7.43
150	73.7	22.827	20	48.3	36.06	0.4041	0.5517	7.43
151	73.6	22.828	20	48.27	36.05	0.4041	0.5515	7.41
152	73.6	22.834	20	48.25	36.05	0.404	0.5514	7.4
153	74.1	22.791	20	48.23	36.01	0.4045	0.5518	7.4
154	74.2	22.783	20	48.18	35.97	0.4061	0.5539	7.37
155	74.5	22.752	20	48.18	35.95	0.4047	0.5519	7.38
156	74.4	22.765	20	48.18	35.96	0.4032	0.5498	7.37
157	74.3	22.774	20	48.18	35.96	0.4031	0.5496	7.36
158	74.6	22.747	20	48.15	35.93	0.4031	0.5494	7.36
159	74.7	22.733	20	48.13	35.91	0.403	0.5492	7.35
160	74.9	22.718	20	48.12	35.9	0.4028	0.5489	7.35
161	74.9	22.715	20	48.11	35.89	0.4028	0.5488	7.34
162	75.1	22.703	20	48.09	35.87	0.4027	0.5488	7.33
163	75.1	22.704	20	48.07	35.86	0.403	0.549	7.32
164	75.1	22.7	20	48.07	35.86	0.4027	0.5483	7.32
165	75.2	22.691	20	48.05	35.84	0.4026	0.5483	7.3
166	75.3	22.685	20	48.03	35.83	0.4027	0.5484	7.3
167	75.6	22.654	20	48.01	35.8	0.4025	0.5479	7.3
168	75.5	22.662	20	48	35.79	0.4023	0.5476	7.28
169	76	22.626	20	47.98	35.76	0.4023	0.5475	7.29
170	75.5	22.662	20	47.97	35.78	0.4024	0.5476	7.26
171	76	22.626	20	47.96	35.75	0.4023	0.5474	7.27
172	76	22.623	20	47.95	35.74	0.4023	0.547	7.26
173	75.9	22.63	20	47.92	35.73	0.402	0.5468	7.24
174	76.3	22.598	20	47.91	35.7	0.4021	0.5469	7.25
175	76.3	22.595	20	47.88	35.69	0.4035	0.5485	7.23
176	76.6	22.574	20	47.87	35.67	0.4025	0.5469	7.23
177	76.5	22.577	20	47.85	35.66	0.4025	0.5471	7.21
178	76.6	22.571	20	47.83	35.64	0.4027	0.5471	7.2
179	76.8	22.552	20	47.81	35.62	0.4023	0.5464	7.19
180	77	22.538	20	47.78	35.59	0.4037	0.5482	7.18
181	76.9	22.549	20	47.76	35.59	0.4046	0.5494	7.16
182	77.3	22.51	20	47.77	35.57	0.4031	0.5472	7.18
183	77.2	22.521	20	47.75	35.57	0.4019	0.5458	7.17
184	77.1	22.531	20	47.74	35.57	0.4025	0.5466	7.15
185	77.6	22.489	20	47.71	35.52	0.4025	0.5464	7.15
186	77.6	22.492	20	47.7	35.52	0.4026	0.5464	7.14
187	77.8	22.474	20	47.68	35.5	0.4025	0.546	7.14
188	77.7	22.48	20	47.7	35.51	0.4016	0.545	7.15
189	77.6	22.491	20	47.67	35.5	0.4016	0.545	7.12
190	77.9	22.467	20	47.67	35.49	0.4015	0.5447	7.13
191	78.1	22.45	20	47.64	35.46	0.4019	0.5452	7.12
192	78.3	22.428	20	47.61	35.43	0.4038	0.5475	7.11
193	78.2	22.438	20	47.6	35.43	0.4017	0.5447	7.09
194	78.2	22.438	20	47.6	35.43	0.4016	0.5445	7.09
195	78.7	22.401	20	47.59	35.4	0.4015	0.5441	7.1
196	78.4	22.427	20	47.57	35.4	0.4016	0.5441	7.08
197	78.5	22.416	20	47.57	35.4	0.4015	0.5443	7.09
198	78.4	22.424	20	47.55	35.39	0.4015	0.544	7.06
199	78.4	22.425	20	47.54	35.39	0.4015	0.5438	7.06
200	78.7	22.401	20	47.55	35.38	0.4013	0.5438	7.08
201	78.5	22.417	20	47.55	35.39	0.4013	0.5437	7.06
202	78.8	22.387	20	47.52	35.35	0.4011	0.5434	7.06
203	79	22.373	20	47.51	35.34	0.4013	0.5436	7.06
204	79	22.375	20	47.5	35.34	0.4012	0.5436	7.05
205	79.1	22.37	20	47.49	35.33	0.4011	0.5431	7.05
206	78.8	22.388	20	47.48	35.33	0.401	0.5432	7.03
207	79.3	22.35	20	47.49	35.31	0.4009	0.5428	7.05
208	79.3	22.355	20	47.46	35.3	0.401	0.5429	7.03
209	79.1	22.365	20	47.45	35.3	0.401	0.5428	7.02
210	79.2	22.363	20	47.47	35.31	0.401	0.5428	7.03
211	79.1	22.366	20	47.44	35.3	0.4007	0.5425	7.01
212	79.1	22.368	20	47.44	35.29	0.4008	0.5426	7.01
213	79.5	22.337	20	47.43	35.27	0.4007	0.5424	7.02
214	79.7	22.318	20	47.44	35.26	0.4008	0.5425	7.03
215	79.3	22.348	20	47.42	35.27	0.4009	0.5425	7.01
216	79.6	22.331	20	47.4	35.25	0.4007	0.5422	7
217	79.4	22.341	20	47.4	35.26	0.4006	0.5421	7
218	79.9	22.307	20	47.39	35.23	0.4004	0.5419	7
219	79.5	22.332	20	47.39	35.24	0.4007	0.542	6.99
220	79.7	22.316	20	47.37	35.22	0.4005	0.5416	6.99
221	79.7	22.319	20	47.37	35.22	0.4008	0.5422	6.98
222	80.2	22.284	20	47.34	35.19	0.4025	0.5442	6.98
223	80.1	22.284	20	47.32	35.18	0.4025	0.5442	6.97
224	80.2	22.282	20	47.32	35.17	0.4033	0.5453	6.97
225	80.3	22.275	20	47.29	35.16	0.4025	0.5441	6.95
226	80.4	22.265	20	47.32	35.16	0.4031	0.545	6.97
227	80.6	22.251	20	47.32	35.15	0.4012	0.5421	6.98
228	80.7	22.241	20	47.31	35.14	0.4014	0.5426	6.98
229	80.4	22.267	20	47.29	35.15	0.4012	0.5423	6.95
230	80.8	22.233	20	47.3	35.13	0.4012	0.5422	6.97
231	80.8	22.233	20	47.28	35.12	0.4014	0.5423	6.96
232	80.7	22.24	20	47.28	35.12	0.4015	0.5424	6.95
233	81.1	22.208	20	47.24	35.08	0.4022	0.5433	6.94
234	81	22.222	20	47.23	35.09	0.4014	0.5425	6.93
235	80.9	22.224	20	47.22	35.08	0.4006	0.5409	6.92
236	80.9	22.226	20	47.2	35.07	0.4004	0.5408	6.91
237	81.1	22.208	20	47.21	35.07	0.4004	0.5407	6.92
238	80.9	22.223	20	47.21	35.07	0.4002	0.5406	6.91
239	81	22.215	20	47.19	35.06	0.4003	0.5407	6.9
240	80.9	22.223	20	47.2	35.07	0.4004	0.5409	6.91
241	80.9	22.224	20	47.22	35.08	0.401	0.5418	6.92
242	80.7	22.245	20	47.25	35.11	0.401	0.5419	6.94
243	80.6	22.25	20	47.27	35.13	0.4011	0.5422	6.95
244	80.2	22.281	20	47.31	35.17	0.4006	0.5417	6.96
245	79.7	22.316	20	47.36	35.22	0.4002	0.5417	6.98
246	79	22.376	20	47.42	35.29	0.4008	0.5422	7
247	78.6	22.409	20	47.51	35.36	0.4009	0.5432	7.04
248	78.1	22.445	20	47.61	35.44	0.4016	0.5444	7.1
249	77.1	22.526	20	47.67	35.53	0.4019	0.5455	7.11
250	76.7	22.56	20	47.79	35.61	0.4024	0.5468	7.18
251	75.7	22.647	20	47.91	35.74	0.403	0.5482	7.23
252	75	22.709	20	48.03	35.84	0.4037	0.5495	7.29
253	73.5	22.84	20	48.14	35.99	0.4058	0.5536	7.31
254	73	22.889	20	48.24	36.07	0.4085	0.5579	7.36
255	71.7	23.003	20	48.41	36.24	0.4085	0.5588	7.44
256	71.1	23.063	20	48.59	36.38	0.4059	0.5561	7.55
257	70.1	23.159	20	48.72	36.51	0.4074	0.5589	7.6
258	69.1	23.255	20	48.87	36.65	0.409	0.5619	7.67
259	68.3	23.337	20	49.02	36.79	0.4083	0.5617	7.76
260	66.2	23.552	20	49.34	37.1	0.4096	0.5657	7.91
261	65.4	23.643	20	49.51	37.25	0.4105	0.5678	8.01
262	64.3	23.764	20	49.65	37.41	0.4104	0.5685	8.07
263	63.6	23.84	20	49.81	37.55	0.4111	0.5703	8.17
264	62.8	23.937	20	49.98	37.7	0.412	0.5724	8.26
265	61.7	24.062	20	50.14	37.87	0.4126	0.5741	8.35
266	61	24.147	20	50.28	38	0.4132	0.5759	8.42
267	60.1	24.254	20	50.42	38.14	0.4142	0.5781	8.49
268	59.4	24.346	20	50.58	38.29	0.4161	0.582	8.6
269	58.7	24.441	20	50.71	38.42	0.418	0.5852	8.67
270	57.6	24.576	20	50.82	38.56	0.4176	0.5857	8.69
271	57.2	24.63	20	50.96	38.68	0.4177	0.5868	8.8
272	56.5	24.721	20	51.12	38.82	0.4186	0.5886	8.9
273	56	24.798	20	51.25	38.94	0.4189	0.5902	8.99
274	55	24.934	20	51.38	39.1	0.4196	0.5919	9.05
275	54.4	25.024	20	51.52	39.23	0.4202	0.5935	9.13
276	53.8	25.109	20	51.66	39.36	0.4206	0.595	9.22
277	53	25.233	20	51.77	39.5	0.4212	0.5968	9.27
278	52.7	25.28	20	51.92	39.6	0.4216	0.598	9.39
279	52.1	25.365	20	52.06	39.73	0.4221	0.5998	9.49
280	51.5	25.46	20	52.16	39.85	0.4226	0.601	9.55
281	50.9	25.558	20	52.3	39.99	0.4231	0.6026	9.64
282	50.2	25.664	20	52.4	40.11	0.4236	0.6039	9.69
283	49.6	25.762	20	52.53	40.23	0.4241	0.6055	9.77
284	49.1	25.847	20	52.64	40.35	0.4245	0.6071	9.84
285	48.7	25.915	20	52.75	40.45	0.4249	0.6082	9.93
286	48.2	26.012	20	52.88	40.58	0.4256	0.61	10.01
287	47.8	26.079	20	52.99	40.68	0.4263	0.6119	10.1
288	47.3	26.167	20	53.1	40.8	0.4266	0.6129	10.18
289	46.9	26.232	20	53.21	40.89	0.427	0.6142	10.26
290	46.3	26.351	20	53.32	41.03	0.4275	0.6156	10.32
291	45.9	26.415	20	53.43	41.12	0.4279	0.6168	10.41
292	45.5	26.492	20	53.52	41.22	0.4284	0.6183	10.47
293	45.2	26.557	20	53.62	41.31	0.4289	0.6196	10.55
294	44.7	26.644	20	53.71	41.42	0.4289	0.6204	10.61
295	44.4	26.706	20	53.82	41.51	0.4293	0.6216	10.71
296	43.9	26.815	20	53.9	41.62	0.4299	0.623	10.74
297	43.6	26.877	20	54.01	41.72	0.4302	0.6244	10.83
298	43.3	26.931	20	54.09	41.8	0.4305	0.6251	10.9
299	42.9	27.021	20	54.17	41.9	0.431	0.6263	10.95
300	42.5	27.097	20	54.27	41.99	0.4313	0.6276	11.02
301	42.2	27.166	20	54.35	42.08	0.432	0.629	11.09
302	41.8	27.236	20	54.44	42.17	0.4322	0.6301	11.15
303	41.5	27.317	20	54.52	42.26	0.4321	0.6303	11.21
304	41.1	27.391	20	54.59	42.34	0.4327	0.6319	11.25
305	41	27.429	20	54.68	42.41	0.433	0.6329	11.34
306	40.6	27.508	20	54.76	42.51	0.4333	0.6338	11.41
307	40.3	27.581	20	54.84	42.59	0.4335	0.6348	11.46
308	39.9	27.656	20	54.91	42.67	0.4339	0.6359	11.51
309	39.9	27.673	20	54.99	42.73	0.4341	0.6365	11.61
310	39.6	27.743	20	55.05	42.8	0.4343	0.6374	11.65
311	39.1	27.842	20	55.13	42.9	0.4348	0.6384	11.69
312	39	27.874	20	55.19	42.95	0.4349	0.6389	11.75
313	38.7	27.942	20	55.26	43.03	0.4351	0.6398	11.8
314	38.5	27.991	20	55.32	43.09	0.4354	0.6409	11.86
315	38.2	28.061	20	55.38	43.17	0.4356	0.6418	11.9
316	38	28.118	20	55.43	43.23	0.4358	0.6425	11.93
317	37.8	28.163	20	55.51	43.3	0.436	0.6431	12.01
318	37.5	28.241	20	55.56	43.37	0.4361	0.6438	12.03
319	37.4	28.27	20	55.64	43.43	0.4365	0.6449	12.13
320	37.2	28.325	20	55.69	43.49	0.4368	0.6457	12.17
321	36.8	28.413	20	55.73	43.57	0.437	0.6464	12.17
322	36.7	28.432	20	55.81	43.62	0.4371	0.647	12.27
323	36.6	28.465	20	55.86	43.66	0.4375	0.6477	12.33
324	36.3	28.55	20	55.92	43.74	0.4377	0.6486	12.35
325	36.2	28.577	20	55.97	43.79	0.4377	0.649	12.42
326	36.1	28.611	20	56.04	43.84	0.438	0.6499	12.49
327	35.9	28.664	20	56.08	43.9	0.4381	0.6504	12.51
328	35.5	28.752	20	56.12	43.97	0.4386	0.6513	12.52
329	35.5	28.766	20	56.19	44.01	0.4385	0.6518	12.61
330	35.2	28.85	20	56.27	44.11	0.4389	0.653	12.69
331	34.9	28.915	20	56.32	44.17	0.4391	0.6536	12.72
332	34.7	28.981	20	56.36	44.23	0.4393	0.6542	12.73
333	34.6	29.009	20	56.41	44.28	0.4394	0.6548	12.8
334	34.5	29.022	20	56.46	44.31	0.4394	0.6553	12.86
335	34.4	29.072	20	56.5	44.36	0.4395	0.6555	12.89
336	34.2	29.134	20	56.55	44.42	0.4398	0.6562	12.92
337	34	29.188	20	56.59	44.47	0.4401	0.6571	12.95
338	33.8	29.225	20	56.63	44.52	0.4405	0.6578	12.99
339	33.7	29.262	20	56.68	44.56	0.4403	0.658	13.03
340	33.6	29.295	20	56.72	44.6	0.4404	0.6583	13.08
341	33.4	29.341	20	56.78	44.66	0.4408	0.6593	13.14
342	33.3	29.367	20	56.8	44.69	0.4408	0.6597	13.16
343	33.2	29.42	20	56.85	44.74	0.4409	0.66	13.2
344	33	29.464	20	56.87	44.78	0.4411	0.6604	13.21
345	33	29.476	20	56.92	44.82	0.4412	0.6612	13.28
346	32.8	29.533	20	56.97	44.87	0.4415	0.6619	13.32
347	32.7	29.571	20	56.98	44.9	0.4415	0.6621	13.31
348	32.5	29.613	20	57.02	44.94	0.4417	0.6627	13.34
349	32.4	29.66	20	57.05	44.99	0.4417	0.6627	13.37
350	32.3	29.683	20	57.08	45.02	0.4419	0.6634	13.4
351	32.1	29.729	20	57.12	45.07	0.442	0.664	13.43
352	32	29.771	20	57.16	45.11	0.4425	0.6648	13.46
353	31.9	29.79	20	57.21	45.15	0.4423	0.6648	13.53
354	31.9	29.807	20	57.23	45.17	0.4422	0.665	13.55
355	31.7	29.852	20	57.27	45.22	0.4424	0.6658	13.59
356	31.6	29.885	20	57.29	45.25	0.4426	0.6662	13.6
357	31.5	29.917	20	57.32	45.28	0.4427	0.6667	13.62
358	31.5	29.933	20	57.35	45.31	0.4429	0.6671	13.67
359	31.4	29.964	20	57.38	45.34	0.4432	0.6676	13.7
360	31.2	30.027	20	57.41	45.39	0.4431	0.668	13.71
361	31.2	30.033	20	57.45	45.42	0.4435	0.6687	13.77
362	31.2	30.034	20	57.49	45.44	0.4433	0.6687	13.84
363	30.9	30.112	20	57.5	45.48	0.4433	0.6688	13.79
364	30.7	30.171	20	57.53	45.53	0.4436	0.6694	13.8
365	30.7	30.178	20	57.56	45.55	0.4439	0.6701	13.85
366	30.7	30.189	20	57.6	45.58	0.4441	0.6706	13.92
367	30.5	30.243	20	57.6	45.61	0.444	0.6707	13.87
368	30.5	30.257	20	57.65	45.65	0.4443	0.6713	13.95
369	30.4	30.288	20	57.67	45.67	0.4441	0.6713	13.96
370	30.3	30.324	20	57.7	45.71	0.4442	0.6717	14
371	30.3	30.306	20	57.73	45.71	0.4442	0.672	14.05
372	30.2	30.358	20	57.74	45.75	0.4443	0.6723	14.04
373	30	30.406	20	57.78	45.8	0.4447	0.6727	14.07
374	30	30.422	20	57.81	45.83	0.4445	0.673	14.12
375	29.9	30.462	20	57.83	45.86	0.4446	0.6734	14.12
376	29.9	30.458	20	57.86	45.87	0.4448	0.6736	14.19
377	29.7	30.534	20	57.86	45.91	0.4448	0.6741	14.13
378	29.7	30.533	20	57.91	45.94	0.445	0.6743	14.21
379	29.6	30.565	20	57.92	45.96	0.4451	0.6747	14.2
380	29.5	30.602	20	57.95	46	0.4451	0.675	14.23
381	29.5	30.591	20	57.98	46.01	0.4453	0.6753	14.31
382	29.4	30.623	20	58	46.04	0.4455	0.6758	14.31
383	29.4	30.621	20	58.03	46.05	0.4456	0.676	14.37
384	29.3	30.659	20	58.05	46.09	0.4456	0.6764	14.38
385	29.1	30.721	20	58.06	46.12	0.4455	0.6763	14.35
386	29.1	30.726	20	58.09	46.14	0.4457	0.6769	14.4
387	29	30.769	20	58.1	46.17	0.4456	0.6771	14.38
388	28.9	30.789	20	58.12	46.19	0.4458	0.6775	14.41
389	28.9	30.794	20	58.15	46.21	0.4459	0.6778	14.46
390	28.9	30.816	20	58.17	46.23	0.446	0.6779	14.47
391	28.8	30.838	20	58.2	46.26	0.4461	0.6783	14.51
392	28.7	30.859	20	58.21	46.28	0.446	0.6784	14.53
393	28.7	30.879	20	58.23	46.3	0.4462	0.6786	14.55
394	28.5	30.926	20	58.24	46.33	0.4461	0.6788	14.53
395	28.6	30.916	20	58.28	46.35	0.4464	0.6793	14.6
396	28.4	30.975	20	58.29	46.38	0.4464	0.6795	14.58
397	28.3	31.009	20	58.29	46.4	0.4464	0.6796	14.55
398	28.4	30.994	20	58.35	46.43	0.4463	0.6799	14.68
399	28.3	31.026	20	58.37	46.46	0.4465	0.6803	14.7
400	28.2	31.059	20	58.37	46.47	0.4466	0.6803	14.66
401	28.1	31.074	20	58.4	46.5	0.4467	0.6807	14.71
402	28.1	31.079	20	58.41	46.51	0.4467	0.6808	14.74
403	28	31.107	20	58.42	46.53	0.4469	0.6813	14.73
404	28	31.131	20	58.44	46.55	0.4471	0.6818	14.75
405	27.9	31.172	20	58.47	46.59	0.4472	0.6822	14.78
406	27.9	31.164	20	58.47	46.59	0.4471	0.6822	14.79
407	27.9	31.167	20	58.49	46.6	0.4466	0.6815	14.81
408	27.8	31.19	20	58.51	46.62	0.4465	0.6814	14.84
409	27.7	31.228	20	58.52	46.65	0.4466	0.6819	14.82
410	27.7	31.229	20	58.55	46.67	0.4466	0.6818	14.89
411	27.6	31.28	20	58.55	46.69	0.4466	0.682	14.84
412	27.5	31.301	20	58.57	46.72	0.4467	0.6824	14.87
413	27.5	31.318	20	58.6	46.74	0.4477	0.6841	14.91
414	27.4	31.338	20	58.61	46.75	0.4468	0.6828	14.91
415	27.4	31.343	20	58.62	46.76	0.4468	0.6829	14.94
416	27.4	31.336	20	58.65	46.78	0.4467	0.6828	15
417	27.3	31.373	20	58.64	46.79	0.4469	0.6832	14.95
418	27.3	31.383	20	58.66	46.81	0.4469	0.6833	14.98
419	27.3	31.388	20	58.69	46.82	0.4468	0.6833	15.03
420	27.3	31.395	20	58.68	46.82	0.4467	0.6833	15.01
421	27.2	31.424	20	58.7	46.85	0.4468	0.6835	15.03
422	27.2	31.427	20	58.71	46.86	0.447	0.6837	15.04
423	27.1	31.47	20	58.7	46.88	0.4468	0.6838	15
424	27.1	31.45	20	58.73	46.88	0.4471	0.6837	15.06
425	27.1	31.46	20	58.74	46.89	0.447	0.6839	15.07
426	27.1	31.478	20	58.75	46.9	0.4471	0.6841	15.07
427	27.1	31.477	20	58.75	46.9	0.4472	0.6845	15.07
428	27.1	31.462	20	58.77	46.91	0.4472	0.6847	15.14
429	27	31.487	20	58.78	46.93	0.4472	0.6847	15.13
430	26.9	31.528	20	58.77	46.95	0.4472	0.6848	15.09
431	27	31.498	20	58.79	46.94	0.4473	0.6848	15.15
432	27	31.511	20	58.79	46.94	0.4473	0.685	15.13
433	26.8	31.562	20	58.81	46.98	0.4475	0.6853	15.13
434	26.9	31.552	20	58.8	46.97	0.4475	0.6852	15.12
435	26.8	31.56	20	58.82	46.99	0.4472	0.6849	15.15
436	26.8	31.571	20	58.82	46.99	0.4473	0.6852	15.15
437	26.8	31.585	20	58.84	47.01	0.4475	0.6853	15.18
438	26.9	31.559	20	58.86	47.01	0.4473	0.6855	15.23
439	26.8	31.583	20	58.86	47.02	0.4476	0.6858	15.22
440	26.7	31.612	20	58.87	47.04	0.4477	0.6859	15.21
441	26.7	31.63	20	58.87	47.05	0.4477	0.6861	15.2
442	26.6	31.64	20	58.88	47.06	0.4475	0.6859	15.21
443	26.5	31.68	20	58.88	47.08	0.4475	0.686	15.19
444	26.5	31.687	20	58.89	47.1	0.4476	0.6863	15.2
445	26.6	31.668	20	58.91	47.09	0.4476	0.6863	15.25
446	26.5	31.681	20	58.93	47.11	0.4478	0.6867	15.27
447	26.5	31.707	20	58.92	47.12	0.4479	0.6866	15.25
448	26.5	31.709	20	58.95	47.14	0.4479	0.687	15.3
449	26.4	31.736	20	58.96	47.16	0.4478	0.6872	15.3
450	26.4	31.75	20	58.97	47.17	0.4479	0.6873	15.3
451	26.4	31.75	20	58.98	47.18	0.448	0.6874	15.33
452	26.4	31.752	20	58.99	47.18	0.4479	0.6874	15.34
453	26.2	31.819	20	59	47.22	0.4481	0.6878	15.31
454	26.3	31.793	20	59	47.21	0.4481	0.6877	15.33
455	26.2	31.832	20	59.01	47.24	0.4483	0.6881	15.33
456	26.2	31.828	20	59.05	47.25	0.4484	0.6886	15.4
457	26.1	31.87	20	59.04	47.27	0.4489	0.6895	15.35
458	26.1	31.838	20	59.06	47.27	0.4485	0.6887	15.42
459	26.1	31.853	20	59.06	47.27	0.4483	0.6886	15.41
460	26.1	31.864	20	59.08	47.29	0.4484	0.689	15.45
461	26	31.888	20	59.1	47.31	0.4484	0.6889	15.46
462	26	31.886	20	59.11	47.32	0.4484	0.6889	15.49
463	26	31.915	20	59.12	47.34	0.4484	0.689	15.48
464	26	31.916	20	59.14	47.35	0.4485	0.6895	15.52
465	25.9	31.929	20	59.15	47.36	0.4487	0.6897	15.53
466	25.8	31.977	20	59.15	47.39	0.4486	0.6899	15.5
467	25.8	31.989	20	59.17	47.4	0.4488	0.6903	15.52
468	25.7	32.01	20	59.19	47.43	0.449	0.6908	15.56
