# Supplementary material for: Design, characterization, and modeling of microcirculation systems with integrated oxygenators
Source: Copernicus journal article supplement (doi:10.5194/jsss-5-221-2016), 2016-06-24
Supplement: Supplementary file 3 [file PIV-nachOxy.xlsx]

## Sheet: bwd
	vmean										Integral(vmean)
Time [s]	1	2	3	4	5	6	7	8	9												Freq	T	T Zeile
0	-370.033	-373.933	-338.835	-317.198	-105.23	-231.153	0	-364.75	2.83044		-0.329329	-0.3328	-0.301563	-0.282306	-0.0936543	-0.205726	0	-0.324627	0.00251909		0.265	3.77358	4239.98
0.00089	-308.984	-321.362	-290.718	-265.005	-93.6687	-184.922	0	-367.542	2.74238		-0.604325	-0.618812	-0.560302	-0.518161	-0.177019	-0.370307	0	-0.65174	0.00495981		0.3	3.33333	3745.32
0.00178	-242.802	-257.658	-237.443	-205.528	-82.3218	-136.465	0	-367.366	2.51595		-0.820418	-0.848128	-0.771626	-0.70108	-0.250286	-0.491761	0	-0.978696	0.00719901		0.34	2.94118	3304.69
0.00267	-172.015	-189.614	-174.179	-142.088	-70.3459	-88.0708	0	-364.825	2.08824		-0.973512	-1.01689	-0.926646	-0.827539	-0.312894	-0.570143	0	-1.30339	0.00905754		0.4	2.5	2808.99
0.003561	-98.839	-117.47	-110.651	-78.6485	-58.5084	-39.7394	0	-366.41	1.64795		-1.06148	-1.12143	-1.02513	-0.897536	-0.364966	-0.605512	0	-1.62949	0.0105242		0.475	2.10526	2365.46
0.004451	-25.1846	-44.1423	-45.0732	-15.2089	-46.6708	8.68002	0	-358.623	1.27055		-1.08389	-1.16072	-1.06524	-0.911072	-0.406503	-0.597786	0	-1.94867	0.011655		0.6	1.66667	1872.66
0.005341	-12.2275	-22.5052	-25.4237	-3.96262	-46.306	10.8815	0	-353.604	0.893162		-1.09478	-1.18075	-1.08787	-0.914599	-0.447716	-0.588102	0	-2.26338	0.0124499		0.8	1.25	1404.49
0.006231	-4.40291	-11.6866	-10.9318	0	-45.6519	10.7808	0	-350.22	0.628987		-1.09869	-1.19115	-1.0976	-0.914599	-0.488346	-0.578507	0	-2.57507	0.0130097		1.2	0.833333	936.33
0.007121	-1.1825	-5.19543	-6.42825	0	-45.677	10.6676	0.213856	-343.565	0.540929		-1.09975	-1.19577	-1.10332	-0.914599	-0.528998	-0.569013	0.000190332	-2.88085	0.0134911		2.4	0.416667	468.165
0.008011	-0.352233	-2.80528	-2.18887	0	-45.6393	10.6425	1.49699	-326.218	0.427711		-1.10006	-1.19827	-1.10527	-0.914599	-0.569617	-0.559541	0.00152265	-3.17118	0.0138718
0.008902	0	-1.59763	0	0	-45.7148	10.4663	3.68586	-320.091	0.251595		-1.10006	-1.19969	-1.10527	-0.914599	-0.610303	-0.550226	0.00480307	-3.45606	0.0140957		Speed	Max	Min	Mean	Q
0.009792	0	-1.27055	0	0	-45.677	10.177	6.07601	-303.184	0.188696		-1.10006	-1.20082	-1.10527	-0.914599	-0.650956	-0.541168	0.0102107	-3.7259	0.0142637		1	-37.1	-1.1	-9.54	-1.3356
0.010682	0	-1.25797	0	0	-45.7399	9.7493	8.49132	-285.686	0.113218		-1.10006	-1.20194	-1.10527	-0.914599	-0.691665	-0.532491	0.017768	-3.98016	0.0143644		2	-40.8	-1.2	-11.88	-1.6632
0.011572	0	-1.25797	0	0	-45.8909	9.32159	10.6928	-274.389	0.062899		-1.10006	-1.20306	-1.10527	-0.914599	-0.732507	-0.524195	0.0272846	-4.22436	0.0144204		3	-46.5	-1.1	-15.436	-2.16104
0.012462	0	-1.25797	0	0	-46.306	8.73034	12.0262	-267.923	0.050319		-1.10006	-1.20418	-1.10527	-0.914599	-0.77372	-0.516425	0.0379879	-4.46281	0.0144652		4	-44.3	-1	-17.32	-2.4248
0.013352	0	-1.25797	0	0	-45.9412	7.98813	12.4917	-258.275	0.037739		-1.10006	-1.2053	-1.10527	-0.914599	-0.814607	-0.509316	0.0491055	-4.69268	0.0144988		5	-58	-15	-20.425	-2.8595
0.014242	0	-1.25797	0	0	-45.828	7.15787	12.9068	-250.11	0		-1.10006	-1.20642	-1.10527	-0.914599	-0.855394	-0.502945	0.0605926	-4.91528	0.0144988		6	-79	-41	-22.8	-3.192
0.015133	0	-1.00638	0	0	-45.6393	6.31503	13.3094	-243.758	0		-1.10006	-1.20732	-1.10527	-0.914599	-0.896013	-0.497325	0.0724379	-5.13222	0.0144988		7	-86	-40	-36.8	-5.152
0.016023	0	-1.00638	0	0	-45.199	5.25833	13.5232	-235.782	0		-1.10006	-1.20821	-1.10527	-0.914599	-0.93624	-0.492645	0.0844736	-5.34207	0.0144988		8	-106	-70	-43.2	-6.048
0.016913	0	-1.00638	0	0	-44.5197	4.17647	13.5232	-227.102	0		-1.10006	-1.20911	-1.10527	-0.914599	-0.975863	-0.488928	0.0965092	-5.54419	0.0144988		9	-141	-114	-64.8	-9.072
0.017803	0	-1.00638	0	0	-44.4065	3.17009	13.4981	-216.711	0		-1.10006	-1.21	-1.10527	-0.914599	-1.01538	-0.486107	0.108523	-5.73706	0.0144988
0.018693	0	-0.754784	0	0	-44.5323	2.30209	13.2087	-209.49	0		-1.10006	-1.21068	-1.10527	-0.914599	-1.05502	-0.484058	0.120278	-5.92351	0.0144988		b:	1
0.019583	0	-0.754784	0	0	-45.4506	1.69826	12.8313	-201.15	0		-1.10006	-1.21135	-1.10527	-0.914599	-1.09547	-0.482546	0.131698	-6.10253	0.0144988		h:	0.25
0.020474	0	-0.754784	0	0	-46.0418	1.45925	12.6175	-193.162	0		-1.10006	-1.21202	-1.10527	-0.914599	-1.13645	-0.481247	0.142928	-6.27444	0.0144988		Vmean/Vmax:	0.56
0.021364	0	-0.50319	0	0	-45.9538	1.29571	12.4162	-187.262	0		-1.10006	-1.21247	-1.10527	-0.914599	-1.17735	-0.480094	0.153978	-6.44111	0.0144988		(aus SimX)
0.022254	0	-0.50319	0	0	-45.8532	1.03154	12.2023	-184.117	0		-1.10006	-1.21292	-1.10527	-0.914599	-1.21815	-0.479176	0.164838	-6.60497	0.0144988
0.023144	0	-0.754784	0	0	-45.5638	0.817683	12.0765	-181.651	0		-1.10006	-1.21359	-1.10527	-0.914599	-1.25871	-0.478449	0.175586	-6.76664	0.0144988
0.024034	0	-0.754784	0	0	-44.8594	0.566088	12.0262	-177.928	0		-1.10006	-1.21426	-1.10527	-0.914599	-1.29863	-0.477945	0.18629	-6.925	0.0144988
0.024924	0	-0.50319	0	0	-43.8907	0.239015	11.9633	-174.833	1.736		-1.10006	-1.21471	-1.10527	-0.914599	-1.33769	-0.477732	0.196937	-7.0806	0.0160438
0.025814	0	-0.50319	0	0	-43.5259	0	11.913	-171.412	4.0381		-1.10006	-1.21515	-1.10527	-0.914599	-1.37643	-0.477732	0.20754	-7.23316	0.0196377
0.026705	0	-0.50319	0	0	-43.1988	0	11.6866	-168.531	6.02569		-1.10006	-1.2156	-1.10527	-0.914599	-1.41488	-0.477732	0.217941	-7.38315	0.0250006
0.027595	0	-0.251595	0	0	-42.7837	0	11.4476	-164.015	6.11375		-1.10006	-1.21583	-1.10527	-0.914599	-1.45296	-0.477732	0.228129	-7.52912	0.0304418
0.028485	0	-0.251595	0	0	-42.3434	0	11.1205	-162.757	6.11375		-1.10006	-1.21605	-1.10527	-0.914599	-1.49064	-0.477732	0.238026	-7.67397	0.0358831
0.029375	0	-0.50319	0	0	-42.6327	0	10.7431	-161.524	4.37775		-1.10006	-1.2165	-1.10527	-0.914599	-1.52859	-0.477732	0.247588	-7.81773	0.0397793
0.030265	0	-0.754784	0	0	-42.746	0	10.3028	-160.178	2.07566		-1.10006	-1.21717	-1.10527	-0.914599	-1.56663	-0.477732	0.256757	-7.96029	0.0416266
0.031155	0	-0.50319	0	0	-42.9975	0	9.6864	-158.266	-0.100638		-1.10006	-1.21762	-1.10527	-0.914599	-1.6049	-0.477732	0.265378	-8.10115	0.041537
0.032046	0	-0.754784	0	0	-43.2995	0	8.84356	-156.655	-2.1134		-1.10006	-1.21829	-1.10527	-0.914599	-1.64343	-0.477732	0.273249	-8.24057	0.0396561
0.032936	0	-1.00638	0	0	-43.0227	0	8.06361	-154.202	-4.51613		-1.10006	-1.21918	-1.10527	-0.914599	-1.68172	-0.477732	0.280425	-8.37781	0.0356368
0.033826	0	-1.00638	0	0	-42.8718	0	7.17045	-150.881	-7.0195		-1.10006	-1.22008	-1.10527	-0.914599	-1.71988	-0.477732	0.286807	-8.51209	0.0293894
0.034716	0	-0.754784	0	0	-42.4944	0	5.78668	-148.516	-9.83736		-1.10006	-1.22075	-1.10527	-0.914599	-1.7577	-0.477732	0.291957	-8.64427	0.0206342
0.035606	0	-0.754784	0	0	-42.2176	0	4.41549	-145.296	-12.6301		-1.10006	-1.22142	-1.10527	-0.914599	-1.79527	-0.477732	0.295887	-8.77359	0.00939342
0.036496	0	-0.50319	0	0	-42.3811	0	3.17009	-143.019	-13.6113		-1.10006	-1.22187	-1.10527	-0.914599	-1.83299	-0.477732	0.298708	-8.90087	-0.00272062
0.037387	0	-0.50319	0	0	-42.3308	0	1.88696	-140.491	-13.8126		-1.10006	-1.22232	-1.10527	-0.914599	-1.87067	-0.477732	0.300388	-9.02591	-0.0150138
0.038277	0	-0.251595	0	0	-42.1421	0	0.805103	-138.767	-13.9258		-1.10006	-1.22254	-1.10527	-0.914599	-1.90817	-0.477732	0.301104	-9.14941	-0.0274077
0.039167	0	-0.251595	0	0	-42.0415	0	0.264175	-135.006	-13.6742		-1.10006	-1.22277	-1.10527	-0.914599	-1.94559	-0.477732	0.301339	-9.26957	-0.0395777
0.040057	0	-0.251595	0	0	-41.7899	0	0.062899	-132.314	-13.1207		-1.10006	-1.22299	-1.10527	-0.914599	-1.98278	-0.477732	0.301395	-9.38733	-0.0512551
0.040947	0	-0.251595	0	0	-41.1861	0	0	-129.269	-12.6301		-1.10006	-1.22322	-1.10527	-0.914599	-2.01944	-0.477732	0.301395	-9.50238	-0.0624959
0.041837	0	0	0	0	-41.0854	0	0	-126.628	-12.4414		-1.10006	-1.22322	-1.10527	-0.914599	-2.05601	-0.477732	0.301395	-9.61508	-0.0735687
0.042727	0	-0.251595	0	0	-40.9471	0	0	-122.489	-12.2023		-1.10006	-1.22344	-1.10527	-0.914599	-2.09245	-0.477732	0.301395	-9.72409	-0.0844288
0.043618	0	-0.251595	0	0	-41.1861	0	-0.037739	-119.331	-11.7998		-1.10006	-1.22366	-1.10527	-0.914599	-2.1291	-0.477732	0.301362	-9.8303	-0.0949306
0.044508	0	-0.251595	0	0	-41.249	0	-0.176116	-116.488	-11.0324		-1.10006	-1.22389	-1.10527	-0.914599	-2.16582	-0.477732	0.301205	-9.93397	-0.104749
0.045398	0	-0.251595	0	0	-41.1357	0	-0.50319	-113.369	-9.28385		-1.10006	-1.22411	-1.10527	-0.914599	-2.20243	-0.477732	0.300757	-10.0349	-0.113012
0.046288	0	-0.251595	0	0	-41.0603	0	-1.67311	-111.28	-6.88112		-1.10006	-1.22434	-1.10527	-0.914599	-2.23897	-0.477732	0.299268	-10.1339	-0.119136
0.047178	0	0	0	0	-40.9219	0	-3.61038	-109.154	-4.50355		-1.10006	-1.22434	-1.10527	-0.914599	-2.27539	-0.477732	0.296055	-10.2311	-0.123144
0.048068	0	0	0	0	-40.7709	0	-5.84958	-107.23	-2.33983		-1.10006	-1.22434	-1.10527	-0.914599	-2.31168	-0.477732	0.290849	-10.3265	-0.125227
0.048959	0	0	0	0	-41.2238	0	-8.11393	-104.487	-0.679306		-1.10006	-1.22434	-1.10527	-0.914599	-2.34837	-0.477732	0.283627	-10.4195	-0.125831
0.049849	0	0	0	0	-41.5383	0	-10.2022	-102.223	-0.01258		-1.10006	-1.22434	-1.10527	-0.914599	-2.38533	-0.477732	0.274548	-10.5105	-0.125843
0.050739	0	0	0	0	-41.8276	0	-12.0137	-98.1345	0		-1.10006	-1.22434	-1.10527	-0.914599	-2.42256	-0.477732	0.263855	-10.5978	-0.125843
0.051629	0	0	0	0	-42.0037	0	-14.3283	-94.9519	0		-1.10006	-1.22434	-1.10527	-0.914599	-2.45994	-0.477732	0.251103	-10.6823	-0.125843
0.052519	0	0	0	0	-41.8905	0	-16.7562	-92.5743	0		-1.10006	-1.22434	-1.10527	-0.914599	-2.49723	-0.477732	0.23619	-10.7647	-0.125843
0.053409	0	0	0	0	-41.1986	0	-20.1653	-91.1151	0.025159		-1.10006	-1.22434	-1.10527	-0.914599	-2.53389	-0.477732	0.218243	-10.8458	-0.12582
0.054299	0	0	0	0	-40.6829	0	-24.8701	-89.6558	0.264175		-1.10006	-1.22434	-1.10527	-0.914599	-2.5701	-0.477732	0.196109	-10.9256	-0.125585
0.05519	0	0	0	0	-40.3432	0	-30.8078	-88.8633	1.10702		-1.10006	-1.22434	-1.10527	-0.914599	-2.60601	-0.477732	0.16869	-11.0047	-0.1246
0.05608	0	0	0	0	-40.1168	0	-38.9846	-88.5488	2.8556		-1.10006	-1.22434	-1.10527	-0.914599	-2.64171	-0.477732	0.133993	-11.0835	-0.122058
0.05697	0	0	0	0	-40.2803	0	-53.0865	-87.7437	4.91868		-1.10006	-1.22434	-1.10527	-0.914599	-2.67756	-0.477732	0.0867464	-11.1616	-0.117681
0.05786	0	0	0	0	-40.2174	0	-75.9061	-86.3851	7.19561		-1.10006	-1.22434	-1.10527	-0.914599	-2.71335	-0.477732	0.0191899	-11.2385	-0.111277
0.05875	0	0	0	0	-40.1419	0	-111.519	-85.6303	9.28385		-1.10006	-1.22434	-1.10527	-0.914599	-2.74908	-0.477732	-0.0800624	-11.3147	-0.103014
0.05964	0	0	0	0	-39.991	0	-162.228	-84.2591	10.8563		-1.10006	-1.22434	-1.10527	-0.914599	-2.78467	-0.477732	-0.224446	-11.3897	-0.093352
0.060531	0	0	0	0	-39.8149	0	-217.957	-82.9634	11.523		-1.10006	-1.22434	-1.10527	-0.914599	-2.82011	-0.477732	-0.418427	-11.4635	-0.0830965
0.061421	0	0	0	0	-40.0665	0	-283.61	-82.3344	11.8627		-1.10006	-1.22434	-1.10527	-0.914599	-2.85577	-0.477732	-0.67084	-11.5368	-0.0725387
0.062311	0	0	0	0	-39.9281	0	-348.408	-81.6299	11.9759		-1.10006	-1.22434	-1.10527	-0.914599	-2.8913	-0.477732	-0.980924	-11.6094	-0.0618801
0.063201	0	0	0	0	-39.8652	0	-400.74	-80.2336	12.064		-1.10006	-1.22434	-1.10527	-0.914599	-2.92678	-0.477732	-1.33758	-11.6808	-0.0511432
0.064091	0	0	0	0	-39.6765	0	-429.208	-79.4159	12.0514		-1.10006	-1.22434	-1.10527	-0.914599	-2.96209	-0.477732	-1.71958	-11.7515	-0.0404174
0.064981	0	0	0	0	-39.3746	0	-454.217	-78.7114	12.1898		-1.10006	-1.22434	-1.10527	-0.914599	-2.99714	-0.477732	-2.12383	-11.8216	-0.0295686
0.065871	0	0	0	0	-38.6827	0	-464.821	-77.8308	12.4917		-1.10006	-1.22434	-1.10527	-0.914599	-3.03157	-0.477732	-2.53752	-11.8908	-0.018451
0.066762	0	0	0	0	-38.8588	0	-467.061	-77.5038	13.0829		-1.10006	-1.22434	-1.10527	-0.914599	-3.06615	-0.477732	-2.95321	-11.9598	-0.00680715
0.067652	0	0	0	0	-38.9846	0	-459.915	-77.9063	13.9384		-1.10006	-1.22434	-1.10527	-0.914599	-3.10085	-0.477732	-3.36253	-12.0291	0.00559798
0.068542	0	0	0	0	-39.2236	0	-454.229	-78.246	15.0202		-1.10006	-1.22434	-1.10527	-0.914599	-3.13576	-0.477732	-3.76679	-12.0988	0.018966
0.069432	0	0	0	0	-39.6891	0	-437.146	-78.5353	16.2404		-1.10006	-1.22434	-1.10527	-0.914599	-3.17108	-0.477732	-4.15585	-12.1687	0.03342
0.070322	0	0	0	0	-39.7017	0	-437.284	-78.8372	17.4481		-1.10006	-1.22434	-1.10527	-0.914599	-3.20641	-0.477732	-4.54504	-12.2389	0.0489488
0.071212	0	0	0	0	-39.7017	0	-431.762	-79.1643	18.4796		-1.10006	-1.22434	-1.10527	-0.914599	-3.24175	-0.477732	-4.9293	-12.3093	0.0653956
0.072103	0	0	0	0	-39.6513	0	-441.36	-78.8121	19.2722		-1.10006	-1.22434	-1.10527	-0.914599	-3.27704	-0.477732	-5.32212	-12.3794	0.0825479
0.072993	0	0	0	0	-39.0727	0	-448.166	-78.334	20.1905		-1.10006	-1.22434	-1.10527	-0.914599	-3.31181	-0.477732	-5.72098	-12.4492	0.100517
0.073883	0	0	0	0	-38.6324	0	-460.758	-78.1202	20.9453		-1.10006	-1.22434	-1.10527	-0.914599	-3.3462	-0.477732	-6.13106	-12.5187	0.119159
0.074773	0	0	0	0	-38.5946	0	-464.381	-77.6925	21.5994		-1.10006	-1.22434	-1.10527	-0.914599	-3.38054	-0.477732	-6.54436	-12.5878	0.138382
0.075663	0	0	0	0	-38.4688	0	-465.865	-76.6609	22.2913		-1.10006	-1.22434	-1.10527	-0.914599	-3.41478	-0.477732	-6.95898	-12.6561	0.158221
0.076553	0	0	0	0	-38.2927	0	-463.4	-76.1452	22.9958		-1.10006	-1.22434	-1.10527	-0.914599	-3.44886	-0.477732	-7.3714	-12.7238	0.178688
0.077443	0	0	0	0	-38.3053	0	-465.06	-75.7175	23.499		-1.10006	-1.22434	-1.10527	-0.914599	-3.48295	-0.477732	-7.78531	-12.7912	0.199602
0.078334	0	0	0	0	-38.1418	0	-465.941	-74.6733	24.065		-1.10006	-1.22434	-1.10527	-0.914599	-3.5169	-0.477732	-8.19999	-12.8577	0.22102
0.079224	0	0	0	0	-37.6386	0	-460.456	-73.7676	24.694		-1.10006	-1.22434	-1.10527	-0.914599	-3.5504	-0.477732	-8.6098	-12.9233	0.242997
0.080114	0	0	0	0	-37.3115	0	-455.953	-72.8493	25.2727		-1.10006	-1.22434	-1.10527	-0.914599	-3.58361	-0.477732	-9.0156	-12.9882	0.26549
0.081004	0	0	0	0	-37.2234	0	-444.807	-72.0064	25.8891		-1.10006	-1.22434	-1.10527	-0.914599	-3.61673	-0.477732	-9.41148	-13.0523	0.288531
0.081894	0	0	0	0	-37.2863	0	-432.139	-71.4278	26.5181		-1.10006	-1.22434	-1.10527	-0.914599	-3.64992	-0.477732	-9.79608	-13.1158	0.312132
0.082784	0	0	0	0	-37.3618	0	-419.27	-71.5032	27.1093		-1.10006	-1.22434	-1.10527	-0.914599	-3.68317	-0.477732	-10.1692	-13.1795	0.33626
0.083675	0	0	0	0	-37.6763	0	-405.407	-71.6416	27.5119		-1.10006	-1.22434	-1.10527	-0.914599	-3.7167	-0.477732	-10.53	-13.2432	0.360745
0.084565	0	0	0	0	-37.865	0	-387.582	-72.0567	28.1283		-1.10006	-1.22434	-1.10527	-0.914599	-3.7504	-0.477732	-10.875	-13.3074	0.385779
0.085455	0	0	0	0	-37.8776	0	-374.801	-72.4216	28.946		-1.10006	-1.22434	-1.10527	-0.914599	-3.78411	-0.477732	-11.2086	-13.3718	0.411541
0.086345	0	0	0	0	-38.0915	0	-364.272	-72.0693	29.8895		-1.10006	-1.22434	-1.10527	-0.914599	-3.81802	-0.477732	-11.5328	-13.436	0.438143
0.087235	0	0	0	0	-38.0537	0	-352.572	-71.6039	30.7449		-1.10006	-1.22434	-1.10527	-0.914599	-3.85188	-0.477732	-11.8466	-13.4997	0.465506
0.088125	0	0	0	0	-38.2172	0	-334.973	-71.0881	31.8519		-1.10006	-1.22434	-1.10527	-0.914599	-3.8859	-0.477732	-12.1447	-13.563	0.493854
0.089015	0	0	0	0	-38.2298	0	-330.105	-70.2453	32.7325		-1.10006	-1.22434	-1.10527	-0.914599	-3.91992	-0.477732	-12.4385	-13.6255	0.522986
0.089906	0	0	0	0	-38.3682	0	-322.016	-69.0628	33.4747		-1.10006	-1.22434	-1.10527	-0.914599	-3.95407	-0.477732	-12.7251	-13.6869	0.552779
0.090796	0	0	0	0	-38.3179	0	-314.506	-68.7483	34.1666		-1.10006	-1.22434	-1.10527	-0.914599	-3.98817	-0.477732	-13.005	-13.7481	0.583187
0.091686	0	0	0	0	-38.5443	0	-309.738	-68.3709	34.9717		-1.10006	-1.22434	-1.10527	-0.914599	-4.02248	-0.477732	-13.2806	-13.809	0.614312
0.092576	0	0	0	0	-38.3682	0	-303.084	-67.6035	35.7768		-1.10006	-1.22434	-1.10527	-0.914599	-4.05662	-0.477732	-13.5504	-13.8691	0.646153
0.093466	0	0	0	0	-38.5192	0	-293.309	-67.1381	36.6574		-1.10006	-1.22434	-1.10527	-0.914599	-4.09091	-0.477732	-13.8114	-13.9289	0.678778
0.094356	0	0	0	0	-38.7708	0	-285.019	-67.3268	37.5379		-1.10006	-1.22434	-1.10527	-0.914599	-4.12541	-0.477732	-14.0651	-13.9888	0.712187
0.095247	0	0	0	0	-38.5192	0	-277.773	-66.8991	38.3556		-1.10006	-1.22434	-1.10527	-0.914599	-4.15969	-0.477732	-14.3123	-14.0484	0.746323
0.096137	0	0	0	0	-38.5946	0	-267.848	-66.4336	39.1733		-1.10006	-1.22434	-1.10527	-0.914599	-4.19404	-0.477732	-14.5507	-14.1075	0.781187
0.097027	0	0	0	0	-38.9217	0	-261.822	-66.0562	39.7017		-1.10006	-1.22434	-1.10527	-0.914599	-4.22868	-0.477732	-14.7837	-14.1663	0.816522
0.097917	0	0	0	0	-39.211	0	-255.042	-65.5153	40.2426		-1.10006	-1.22434	-1.10527	-0.914599	-4.26358	-0.477732	-15.0107	-14.2246	0.852338
0.098807	0	0	0	0	-38.9091	0	-246.11	-64.7857	40.9093		-1.10006	-1.22434	-1.10527	-0.914599	-4.29821	-0.477732	-15.2298	-14.2822	0.888747
0.099697	0	0	0	0	-39.0727	0	-236.562	-64.6473	41.5383		-1.10006	-1.22434	-1.10527	-0.914599	-4.33299	-0.477732	-15.4403	-14.3398	0.925716
0.100588	0	0	0	0	-38.8588	0	-230.348	-64.207	42.1044		-1.10006	-1.22434	-1.10527	-0.914599	-4.36757	-0.477732	-15.6453	-14.3969	0.963189
0.101478	0	0	0	0	-38.3053	0	-223.466	-64.1064	42.9221		-1.10006	-1.22434	-1.10527	-0.914599	-4.40166	-0.477732	-15.8442	-14.454	1.00139
0.102368	0	0	0	0	-37.2109	0	-217.328	-64.446	43.7775		-1.10006	-1.22434	-1.10527	-0.914599	-4.43478	-0.477732	-16.0376	-14.5113	1.04035
0.103258	0	0	0	0	-36.4183	0	-212.66	-64.6724	44.4694		-1.10006	-1.22434	-1.10527	-0.914599	-4.46719	-0.477732	-16.2269	-14.5689	1.07993
0.104148	0	0	0	0	-35.89	0	-209.188	-64.2447	45.1613		-1.10006	-1.22434	-1.10527	-0.914599	-4.49913	-0.477732	-16.4131	-14.6261	1.12012
0.105038	0	0	0	0	-35.3239	0	-203.339	-63.968	45.6896		-1.10006	-1.22434	-1.10527	-0.914599	-4.53057	-0.477732	-16.594	-14.683	1.16079
0.105928	0	0	0	0	-35.2233	0	-199.175	-63.8799	45.9286		-1.10006	-1.22434	-1.10527	-0.914599	-4.56192	-0.477732	-16.7713	-14.7399	1.20166
0.106819	0	0	0	0	-35.412	0	-192.005	-63.2258	46.457		-1.10006	-1.22434	-1.10527	-0.914599	-4.59344	-0.477732	-16.9422	-14.7961	1.24301
0.107709	0	0	0	0	-35.7013	0	-186.142	-62.2194	46.8218		-1.10006	-1.22434	-1.10527	-0.914599	-4.62521	-0.477732	-17.1078	-14.8515	1.28468
0.108599	0	0	0	0	-35.8145	0	-178.947	-61.9049	47.3627		-1.10006	-1.22434	-1.10527	-0.914599	-4.65709	-0.477732	-17.2671	-14.9066	1.32683
0.109489	0	0	0	0	-35.9781	0	-174.959	-61.7539	48.1301		-1.10006	-1.22434	-1.10527	-0.914599	-4.68911	-0.477732	-17.4228	-14.9616	1.36967
0.110379	0	0	0	0	-35.9655	0	-170.531	-61.0998	49.0736		-1.10006	-1.22434	-1.10527	-0.914599	-4.72112	-0.477732	-17.5746	-15.0159	1.41335
0.111269	0	0	0	0	-35.8145	0	-168.896	-61.1501	50.2057		-1.10006	-1.22434	-1.10527	-0.914599	-4.75299	-0.477732	-17.7249	-15.0704	1.45803
0.11216	0	0	0	0	-35.8019	0	-164.807	-61.6156	51.2121		-1.10006	-1.22434	-1.10527	-0.914599	-4.78485	-0.477732	-17.8716	-15.1252	1.50361
0.11305	0	0	0	0	-35.9026	0	-161.788	-61.4772	52.1053		-1.10006	-1.22434	-1.10527	-0.914599	-4.81681	-0.477732	-18.0156	-15.1799	1.54998
0.11394	0	0	0	0	-35.7139	0	-156.429	-61.3514	52.7217		-1.10006	-1.22434	-1.10527	-0.914599	-4.84859	-0.477732	-18.1548	-15.2345	1.5969
0.11483	0	0	0	0	-35.6761	0	-152.592	-61.603	53.6023		-1.10006	-1.22434	-1.10527	-0.914599	-4.88034	-0.477732	-18.2906	-15.2893	1.64461
0.11572	0	0	0	0	-35.8397	0	-148.554	-61.5652	53.9293		-1.10006	-1.22434	-1.10527	-0.914599	-4.91224	-0.477732	-18.4228	-15.3441	1.69261
0.11661	0	0	0	0	-35.7013	0	-145.309	-61.5023	54.5206		-1.10006	-1.22434	-1.10527	-0.914599	-4.94402	-0.477732	-18.5521	-15.3989	1.74113
0.1175	0	0	0	0	-35.5503	0	-143.9	-61.8546	54.9986		-1.10006	-1.22434	-1.10527	-0.914599	-4.97566	-0.477732	-18.6802	-15.4539	1.79008
0.118391	0	0	0	0	-35.4497	0	-142.566	-61.8797	56.005		-1.10006	-1.22434	-1.10527	-0.914599	-5.00721	-0.477732	-18.8071	-15.509	1.83992
0.119281	0	0	0	0	-35.2736	0	-139.446	-62.0936	57.4517		-1.10006	-1.22434	-1.10527	-0.914599	-5.0386	-0.477732	-18.9312	-15.5643	1.89106
0.120171	0	0	0	0	-34.9717	0	-137.987	-62.3955	59.0116		-1.10006	-1.22434	-1.10527	-0.914599	-5.06972	-0.477732	-19.054	-15.6198	1.94358
0.121061	0	0	0	0	-34.8459	0	-136.855	-62.5087	60.6721		-1.10006	-1.22434	-1.10527	-0.914599	-5.10074	-0.477732	-19.1758	-15.6754	1.99757
0.121951	0	0	0	0	-34.4559	0	-134.591	-62.6597	62.1439		-1.10006	-1.22434	-1.10527	-0.914599	-5.1314	-0.477732	-19.2956	-15.7312	2.05288
0.122841	0	0	0	0	-34.4056	0	-131.949	-62.8106	62.8106		-1.10006	-1.22434	-1.10527	-0.914599	-5.16202	-0.477732	-19.413	-15.7871	2.10878
0.123732	0	0	0	0	-34.0534	0	-130.691	-62.5087	62.0936		-1.10006	-1.22434	-1.10527	-0.914599	-5.19233	-0.477732	-19.5294	-15.8427	2.16405
0.124622	0	0	0	0	-33.915	0	-128.099	-62.2571	59.1374		-1.10006	-1.22434	-1.10527	-0.914599	-5.22252	-0.477732	-19.6434	-15.8981	2.21668
0.125512	0	0	0	0	-33.8018	0	-124.816	-61.7414	53.0865		-1.10006	-1.22434	-1.10527	-0.914599	-5.2526	-0.477732	-19.7544	-15.9531	2.26393
0.126402	0	0	0	0	-34.0156	0	-121.52	-61.2633	44.2429		-1.10006	-1.22434	-1.10527	-0.914599	-5.28287	-0.477732	-19.8626	-16.0076	2.3033
0.127292	0	0	0	0	-34.1666	0	-118.929	-61.2759	32.0154		-1.10006	-1.22434	-1.10527	-0.914599	-5.31328	-0.477732	-19.9684	-16.0621	2.3318
0.128182	0	0	0	0	-34.3301	0	-115.935	-61.2256	17.9513		-1.10006	-1.22434	-1.10527	-0.914599	-5.34384	-0.477732	-20.0716	-16.1166	2.34777
0.129072	0	0	0	0	-34.4559	0	-112.362	-60.8482	3.49717		-1.10006	-1.22434	-1.10527	-0.914599	-5.3745	-0.477732	-20.1716	-16.1708	2.35088
0.129963	0	0	0	0	-34.632	0	-109.746	-60.7727	-10.9192		-1.10006	-1.22434	-1.10527	-0.914599	-5.40532	-0.477732	-20.2693	-16.2249	2.34117
0.130853	0	-0.251595	0	0	-34.5817	0	-107.959	-60.3828	-24.933		-1.10006	-1.22456	-1.10527	-0.914599	-5.4361	-0.477732	-20.3654	-16.2786	2.31898
0.131743	0	-0.251595	0	0	-34.5314	0	-106.186	-59.5902	-37.8021		-1.10006	-1.22478	-1.10527	-0.914599	-5.46683	-0.477732	-20.4599	-16.3316	2.28533
0.132633	0	-0.251595	0	0	-34.6949	0	-103.317	-58.7474	-51.1492		-1.10006	-1.22501	-1.10527	-0.914599	-5.49771	-0.477732	-20.5518	-16.3839	2.23981
0.133523	0	-0.251595	0	0	-34.7075	0	-101.292	-58.1687	-65.4272		-1.10006	-1.22523	-1.10527	-0.914599	-5.5286	-0.477732	-20.642	-16.4357	2.18158
0.134413	0	-0.50319	0	0	-34.4182	0	-98.7384	-57.6655	-79.202		-1.10006	-1.22568	-1.10527	-0.914599	-5.55923	-0.477732	-20.7299	-16.487	2.11109
0.135304	0	-0.50319	0	0	-34.3049	0	-95.6563	-57.3259	-93.5304		-1.10006	-1.22613	-1.10527	-0.914599	-5.58977	-0.477732	-20.815	-16.538	2.02785
0.136194	0	-0.754784	0	0	-34.0659	0	-92.8259	-56.8982	-107.595		-1.10006	-1.2268	-1.10527	-0.914599	-5.62008	-0.477732	-20.8976	-16.5887	1.93209
0.137084	0	-1.00638	0	0	-33.4998	0	-90.6748	-56.5711	-121.269		-1.10006	-1.22769	-1.10527	-0.914599	-5.6499	-0.477732	-20.9783	-16.639	1.82416
0.137974	0	-1.25797	0	0	-33.0847	0	-88.5236	-56.2566	-133.408		-1.10006	-1.22881	-1.10527	-0.914599	-5.67935	-0.477732	-21.0571	-16.6891	1.70543
0.138864	0	-1.00638	0	0	-32.896	0	-87.3411	-55.9924	-144.906		-1.10006	-1.22971	-1.10527	-0.914599	-5.70862	-0.477732	-21.1348	-16.7389	1.57646
0.139754	0	-1.00638	0	0	-32.5186	0	-87.2531	-55.615	-156.618		-1.10006	-1.2306	-1.10527	-0.914599	-5.73756	-0.477732	-21.2125	-16.7884	1.43707
0.140644	0	-1.00638	0	0	-32.3425	0	-86.6744	-55.7031	-167.436		-1.10006	-1.2315	-1.10527	-0.914599	-5.76635	-0.477732	-21.2896	-16.838	1.28805
0.141535	0	-1.00638	0	0	-32.4557	0	-85.5674	-56.0176	-179.035		-1.10006	-1.2324	-1.10527	-0.914599	-5.79523	-0.477732	-21.3658	-16.8879	1.12871
0.142425	0	-1.00638	0	0	-32.6067	0	-84.2591	-56.0553	-189.476		-1.10006	-1.23329	-1.10527	-0.914599	-5.82425	-0.477732	-21.4408	-16.9378	0.960077
0.143315	0	-1.25797	0	0	-32.8457	0	-83.3785	-55.9044	-199.427		-1.10006	-1.23441	-1.10527	-0.914599	-5.85349	-0.477732	-21.515	-16.9875	0.782587
0.144205	0	-1.25797	0	0	-33.1099	0	-81.8689	-55.8289	-211		-1.10006	-1.23553	-1.10527	-0.914599	-5.88296	-0.477732	-21.5879	-17.0372	0.594797
0.145095	0	-1.25797	0	0	-33.3111	0	-81.3783	-55.7408	-223.341		-1.10006	-1.23665	-1.10527	-0.914599	-5.9126	-0.477732	-21.6603	-17.0868	0.396024
0.145985	0	-1.25797	0	0	-33.4369	0	-81.2148	-55.4641	-232.461		-1.10006	-1.23777	-1.10527	-0.914599	-5.94236	-0.477732	-21.7326	-17.1362	0.189133
0.146876	0	-1.00638	0	0	-33.3866	0	-81.0764	-55.3886	-247.569		-1.10006	-1.23867	-1.10527	-0.914599	-5.97208	-0.477732	-21.8047	-17.1855	-0.0312032
0.147766	0	-1.00638	0	0	-33.2105	0	-80.8626	-55.5018	-260.162		-1.10006	-1.23956	-1.10527	-0.914599	-6.00163	-0.477732	-21.8767	-17.2349	-0.262747
0.148656	0	-1.00638	0	0	-33.2105	0	-80.7116	-55.3634	-268.301		-1.10006	-1.24046	-1.10527	-0.914599	-6.03119	-0.477732	-21.9485	-17.2841	-0.501535
0.149546	0	-0.754784	0	0	-33.2231	0	-79.8688	-54.9231	-277.735		-1.10006	-1.24113	-1.10527	-0.914599	-6.06076	-0.477732	-22.0196	-17.333	-0.748719
0.150436	0	-0.50319	0	0	-33.1728	0	-79.6423	-54.6464	-290.844		-1.10006	-1.24158	-1.10527	-0.914599	-6.09028	-0.477732	-22.0905	-17.3817	-1.00757
0.151326	0	-0.754784	0	0	-33.2734	0	-79.982	-54.42	-304.153		-1.10006	-1.24225	-1.10527	-0.914599	-6.1199	-0.477732	-22.1617	-17.4301	-1.27827
0.152216	0	-0.50319	0	0	-33.1099	0	-80.1204	-53.8413	-321.123		-1.10006	-1.2427	-1.10527	-0.914599	-6.14936	-0.477732	-22.233	-17.478	-1.56407
0.153107	0	-0.50319	0	0	-32.6947	0	-80.1078	-53.8287	-342.471		-1.10006	-1.24314	-1.10527	-0.914599	-6.17846	-0.477732	-22.3043	-17.5259	-1.86886
0.153997	0	-0.754784	0	0	-32.2545	0	-80.2713	-54.1558	-363.202		-1.10006	-1.24382	-1.10527	-0.914599	-6.20717	-0.477732	-22.3757	-17.5741	-2.19211
0.154887	0	-1.00638	0	0	-32.1161	0	-80.0323	-54.42	-385.33		-1.10006	-1.24471	-1.10527	-0.914599	-6.23575	-0.477732	-22.4469	-17.6225	-2.53506
0.155777	0	-1.00638	0	0	-31.8519	0	-79.504	-54.6086	-404.992		-1.10006	-1.24561	-1.10527	-0.914599	-6.2641	-0.477732	-22.5177	-17.6711	-2.8955
0.156667	0	-1.25797	0	0	-31.8645	0	-78.6737	-55.2502	-419.295		-1.10006	-1.24673	-1.10527	-0.914599	-6.29246	-0.477732	-22.5877	-17.7203	-3.26867
0.157557	0	-1.00638	0	0	-32.0154	0	-77.9692	-55.1118	-434.63		-1.10006	-1.24762	-1.10527	-0.914599	-6.32095	-0.477732	-22.6571	-17.7694	-3.65549
0.158448	0	-1.00638	0	0	-32.1161	0	-76.9251	-54.6841	-441.348		-1.10006	-1.24852	-1.10527	-0.914599	-6.34954	-0.477732	-22.7256	-17.818	-4.04829
0.159338	0	-1.00638	0	0	-31.8267	0	-76.2584	-54.0677	-437.02		-1.10006	-1.24941	-1.10527	-0.914599	-6.37786	-0.477732	-22.7934	-17.8662	-4.43724
0.160228	0	-1.00638	0	0	-31.6129	0	-76.271	-53.6274	-423.51		-1.10006	-1.25031	-1.10527	-0.914599	-6.406	-0.477732	-22.8613	-17.9139	-4.81417
0.161118	0	-0.754784	0	0	-31.2229	0	-76.1452	-52.8097	-407.86		-1.10006	-1.25098	-1.10527	-0.914599	-6.43379	-0.477732	-22.9291	-17.9609	-5.17716
0.162008	0	-1.00638	0	0	-30.9839	0	-75.4659	-52.6336	-379.028		-1.10006	-1.25188	-1.10527	-0.914599	-6.46136	-0.477732	-22.9963	-18.0077	-5.5145
0.162898	0	-0.754784	0	0	-30.8204	0	-75.2394	-52.4953	-355.038		-1.10006	-1.25255	-1.10527	-0.914599	-6.48879	-0.477732	-23.0632	-18.0545	-5.83048
0.163788	0	-0.50319	0	0	-30.77	0	-74.774	-52.6462	-333.703		-1.10006	-1.253	-1.10527	-0.914599	-6.51618	-0.477732	-23.1298	-18.1013	-6.12748
0.164679	0	-0.251595	0	0	-30.7449	0	-73.7928	-52.5078	-313.902		-1.10006	-1.25322	-1.10527	-0.914599	-6.54354	-0.477732	-23.1954	-18.148	-6.40685
0.165569	0	-0.50319	0	0	-31.0216	0	-72.3964	-52.5959	-298.807		-1.10006	-1.25367	-1.10527	-0.914599	-6.57115	-0.477732	-23.2599	-18.1948	-6.67279
0.166459	0	-0.251595	0	0	-31.2103	0	-71.6919	-52.5204	-289.183		-1.10006	-1.25389	-1.10527	-0.914599	-6.59893	-0.477732	-23.3237	-18.2416	-6.93016
0.167349	0	-0.50319	0	0	-31.4871	0	-71.0881	-52.4953	-276.679		-1.10006	-1.25434	-1.10527	-0.914599	-6.62695	-0.477732	-23.387	-18.2883	-7.1764
0.168239	0	-0.50319	0	0	-31.789	0	-70.6101	-52.2688	-262.841		-1.10006	-1.25479	-1.10527	-0.914599	-6.65524	-0.477732	-23.4498	-18.3348	-7.41033
0.169129	0	-0.50319	0	0	-31.9903	0	-69.7169	-52.1179	-253.28		-1.10006	-1.25524	-1.10527	-0.914599	-6.68371	-0.477732	-23.5118	-18.3812	-7.63575
0.17002	0	-0.251595	0	0	-32.0532	0	-69.3521	-51.8788	-245.506		-1.10006	-1.25546	-1.10527	-0.914599	-6.71224	-0.477732	-23.5736	-18.4274	-7.85425
0.17091	0	-0.251595	0	0	-32.2419	0	-68.157	-52.1933	-236.386		-1.10006	-1.25568	-1.10527	-0.914599	-6.74094	-0.477732	-23.6342	-18.4738	-8.06464
0.1718	0	0	0	0	-32.1664	0	-67.7293	-51.9669	-230.134		-1.10006	-1.25568	-1.10527	-0.914599	-6.76956	-0.477732	-23.6945	-18.5201	-8.26945
0.17269	0	0	0	0	-31.9777	0	-66.811	-51.8663	-227.555		-1.10006	-1.25568	-1.10527	-0.914599	-6.79802	-0.477732	-23.754	-18.5663	-8.47198
0.17358	0	0	0	0	-31.6632	0	-66.3204	-52.0675	-222.51		-1.10006	-1.25568	-1.10527	-0.914599	-6.8262	-0.477732	-23.813	-18.6126	-8.67001
0.17447	0	0	0	0	-31.4745	0	-65.5782	-52.2688	-214.258		-1.10006	-1.25568	-1.10527	-0.914599	-6.85422	-0.477732	-23.8714	-18.6591	-8.8607
0.175361	0	0	0	0	-31.0342	0	-65.465	-51.7279	-208.723		-1.10006	-1.25568	-1.10527	-0.914599	-6.88184	-0.477732	-23.9296	-18.7051	-9.04647
0.176251	0	0	0	0	-30.8707	0	-64.3579	-51.7405	-203.578		-1.10006	-1.25568	-1.10527	-0.914599	-6.90931	-0.477732	-23.9869	-18.7512	-9.22765
0.177141	0	0	0	0	-30.443	0	-63.6157	-51.5769	-197.665		-1.10006	-1.25568	-1.10527	-0.914599	-6.93641	-0.477732	-24.0435	-18.7971	-9.40357
0.178031	0	0	0	0	-30.0782	0	-63.3641	-51.1366	-192.659		-1.10006	-1.25568	-1.10527	-0.914599	-6.96318	-0.477732	-24.0999	-18.8426	-9.57504
0.178921	0	0	0	0	-29.6127	0	-63.7541	-50.2435	-188.86		-1.10006	-1.25568	-1.10527	-0.914599	-6.98953	-0.477732	-24.1567	-18.8873	-9.74312
0.179811	0	0	0	0	-29.3234	0	-63.578	-49.2623	-184.759		-1.10006	-1.25568	-1.10527	-0.914599	-7.01563	-0.477732	-24.2132	-18.9312	-9.90756
0.180701	0	0	0	0	-29.1221	0	-63.5151	-47.803	-181.928		-1.10006	-1.25568	-1.10527	-0.914599	-7.04155	-0.477732	-24.2698	-18.9737	-10.0695
0.181592	-0.251595	-0.251595	0	0	-29.4114	0	-63.3013	-46.3312	-179.651		-1.10028	-1.25591	-1.10527	-0.914599	-7.06772	-0.477732	-24.3261	-19.015	-10.2294
0.182482	-0.251595	-0.251595	0	0	-29.4366	0	-63.0874	-44.8342	-177.94		-1.10051	-1.25613	-1.10527	-0.914599	-7.09392	-0.477732	-24.3823	-19.0549	-10.3877
0.183372	-0.251595	-0.251595	0	0	-29.1976	0	-62.4961	-43.853	-175.575		-1.10073	-1.25636	-1.10527	-0.914599	-7.11991	-0.477732	-24.4379	-19.0939	-10.544
0.184262	-0.251595	-0.50319	0	0	-29.1473	0	-62.6471	-44.3058	-173.173		-1.10096	-1.2568	-1.10527	-0.914599	-7.14585	-0.477732	-24.4936	-19.1333	-10.6981
0.185152	-0.251595	-0.50319	0	0	-29.2353	0	-62.6597	-48.3314	-168.606		-1.10118	-1.25725	-1.10527	-0.914599	-7.17187	-0.477732	-24.5494	-19.1763	-10.8482
0.186042	0	-0.251595	0	0	-30.3675	0	-62.5716	-57.6026	-164.732		-1.10118	-1.25748	-1.10527	-0.914599	-7.1989	-0.477732	-24.6051	-19.2276	-10.9948
0.186933	-0.251595	-0.251595	0	0	-30.4933	0	-62.0307	-72.7361	-161.121		-1.1014	-1.2577	-1.10527	-0.914599	-7.22603	-0.477732	-24.6603	-19.2923	-11.1382
0.187823	-0.50319	-0.251595	0	0	-30.7197	0	-61.691	-92.0334	-156.907		-1.10185	-1.25792	-1.10527	-0.914599	-7.25338	-0.477732	-24.7152	-19.3742	-11.2778
0.188713	-0.754784	-0.251595	0	0	-30.6568	0	-60.8734	-117.281	-153.246		-1.10252	-1.25815	-1.10527	-0.914599	-7.28066	-0.477732	-24.7694	-19.4786	-11.4142
0.189603	-1.00638	-0.251595	0	0	-30.1285	0	-59.9676	-143.585	-151.586		-1.10342	-1.25837	-1.10527	-0.914599	-7.30747	-0.477732	-24.8227	-19.6064	-11.5491
0.190493	-1.25797	-0.251595	0	0	-28.9082	0	-59.6531	-169.286	-149.535		-1.10454	-1.25859	-1.10527	-0.914599	-7.3332	-0.477732	-24.8758	-19.7571	-11.6822
0.191383	-1.25797	-0.251595	0	0	-28.9837	0	-59.4267	-192.369	-147.271		-1.10566	-1.25882	-1.10527	-0.914599	-7.359	-0.477732	-24.9287	-19.9283	-11.8133
0.192273	-1.25797	-0.251595	0	0	-29.336	0	-58.848	-210.321	-145.183		-1.10678	-1.25904	-1.10527	-0.914599	-7.38511	-0.477732	-24.9811	-20.1155	-11.9425
0.193164	-1.25797	-0.251595	0	0	-29.3485	0	-58.4455	-231.417	-143.963		-1.1079	-1.25927	-1.10527	-0.914599	-7.41123	-0.477732	-25.0331	-20.3214	-12.0706
0.194054	-1.25797	-0.251595	0	0	-29.7008	0	-58.3197	-253.419	-140.126		-1.10902	-1.25949	-1.10527	-0.914599	-7.43766	-0.477732	-25.085	-20.547	-12.1953
0.194944	-1.25797	-0.50319	0	0	-29.6001	0	-57.9045	-273.37	-136.616		-1.11014	-1.25994	-1.10527	-0.914599	-7.464	-0.477732	-25.1366	-20.7903	-12.3169
0.195834	-1.25797	-0.50319	0	0	-29.7133	0	-57.5397	-292.831	-132.477		-1.11126	-1.26039	-1.10527	-0.914599	-7.49045	-0.477732	-25.1878	-21.0509	-12.4348
0.196724	-1.25797	-0.50319	0	0	-29.575	0	-57.3762	-313.336	-129.685		-1.11238	-1.26083	-1.10527	-0.914599	-7.51677	-0.477732	-25.2388	-21.3298	-12.5503
0.197614	-1.25797	-0.251595	0	0	-29.7762	0	-57.4265	-326.507	-126.59		-1.1135	-1.26106	-1.10527	-0.914599	-7.54327	-0.477732	-25.2899	-21.6204	-12.6629
0.198505	-1.25797	-0.251595	0	0	-30.1159	0	-57.6655	-339.967	-124.3		-1.11461	-1.26128	-1.10527	-0.914599	-7.57008	-0.477732	-25.3413	-21.9229	-12.7735
0.199395	-1.25797	0	0	0	-30.4052	0	-58.0932	-356.799	-121.105		-1.11573	-1.26128	-1.10527	-0.914599	-7.59714	-0.477732	-25.393	-22.2405	-12.8813
0.200285	-1.25797	0	0	0	-30.8707	0	-58.4706	-368.976	-117.595		-1.11685	-1.26128	-1.10527	-0.914599	-7.62461	-0.477732	-25.445	-22.5689	-12.986
0.201175	-1.25797	0	0	0	-31.2103	0	-58.9109	-383.871	-113.582		-1.11797	-1.26128	-1.10527	-0.914599	-7.65239	-0.477732	-25.4974	-22.9105	-13.0871
0.202065	-1.25797	0	0	0	-31.6506	0	-58.9738	-396.211	-108.739		-1.11909	-1.26128	-1.10527	-0.914599	-7.68056	-0.477732	-25.5499	-23.2631	-13.1839
0.202955	-1.25797	0	0	0	-31.7387	0	-58.9738	-401.558	-104.877		-1.12021	-1.26128	-1.10527	-0.914599	-7.7088	-0.477732	-25.6024	-23.6205	-13.2772
0.203845	-1.25797	0	0	0	-31.9274	0	-58.7222	-391.368	-102.626		-1.12133	-1.26128	-1.10527	-0.914599	-7.73722	-0.477732	-25.6547	-23.9688	-13.3685
0.204736	-1.25797	0	0	0	-31.9777	0	-58.5461	-400.451	-101.091		-1.12245	-1.26128	-1.10527	-0.914599	-7.76568	-0.477732	-25.7068	-24.3252	-13.4585
0.205626	-1.25797	0	0	0	-31.9022	0	-58.4832	-408.074	-99.4554		-1.12357	-1.26128	-1.10527	-0.914599	-7.79407	-0.477732	-25.7588	-24.6884	-13.547
0.206516	-1.25797	0	0	0	-31.6003	0	-58.4203	-411.043	-98.1723		-1.12469	-1.26128	-1.10527	-0.914599	-7.8222	-0.477732	-25.8108	-25.0543	-13.6344
0.207406	-1.25797	0	0	0	-31.3864	0	-58.1939	-421.157	-96.5369		-1.12581	-1.26128	-1.10527	-0.914599	-7.85013	-0.477732	-25.8626	-25.4291	-13.7203
0.208296	-1.25797	-0.251595	0	0	-31.1978	0	-57.9674	-428.541	-94.021		-1.12693	-1.26151	-1.10527	-0.914599	-7.8779	-0.477732	-25.9142	-25.8105	-13.804
0.209186	-1.25797	-0.251595	0	0	-30.6568	0	-57.502	-407.848	-91.6182		-1.12805	-1.26173	-1.10527	-0.914599	-7.90518	-0.477732	-25.9654	-26.1735	-13.8855
0.210077	-1.25797	-0.251595	0	0	-30.5436	0	-57.0365	-395.293	-89.9703		-1.12917	-1.26195	-1.10527	-0.914599	-7.93237	-0.477732	-26.0161	-26.5253	-13.9656
0.210967	-1.25797	-0.251595	0	0	-30.5059	0	-56.8604	-392.5	-87.9324		-1.13029	-1.26218	-1.10527	-0.914599	-7.95952	-0.477732	-26.0668	-26.8746	-14.0439
0.211857	-1.25797	-0.251595	0	0	-30.3549	0	-56.3572	-377.556	-86.297		-1.13141	-1.2624	-1.10527	-0.914599	-7.98653	-0.477732	-26.1169	-27.2106	-14.1207
0.212747	-1.24539	0	0	0	-30.2417	0	-55.9295	-371.241	-85.341		-1.13252	-1.2624	-1.10527	-0.914599	-8.01345	-0.477732	-26.1667	-27.541	-14.1966
0.213637	-1.23281	0	0	0	-30.3549	0	-55.4515	-370.775	-83.8565		-1.13361	-1.2624	-1.10527	-0.914599	-8.04046	-0.477732	-26.216	-27.871	-14.2713
0.214527	-1.22023	0	0	0	-30.443	0	-55.0615	-359.353	-82.2589		-1.1347	-1.2624	-1.10527	-0.914599	-8.06756	-0.477732	-26.265	-28.1909	-14.3445
0.215417	-1.19508	0	0	0	-30.6317	0	-54.5583	-337.062	-79.9694		-1.13576	-1.2624	-1.10527	-0.914599	-8.09482	-0.477732	-26.3136	-28.4908	-14.4156
0.216308	-1.16992	0	0	0	-30.8078	0	-55.0867	-319.601	-77.3906		-1.13681	-1.2624	-1.10527	-0.914599	-8.12224	-0.477732	-26.3626	-28.7753	-14.4845
0.217198	-1.15734	0	0	0	-30.8329	0	-55.1622	-303.033	-74.4469		-1.13784	-1.2624	-1.10527	-0.914599	-8.14968	-0.477732	-26.4117	-29.045	-14.5508
0.218088	-1.15734	0	0	0	-30.8078	0	-55.376	-283.9	-71.3145		-1.13887	-1.2624	-1.10527	-0.914599	-8.1771	-0.477732	-26.461	-29.2977	-14.6142
0.218978	-1.16992	0	0	0	-30.7952	0	-55.4515	-261.747	-68.1696		-1.13991	-1.2624	-1.10527	-0.914599	-8.20451	-0.477732	-26.5104	-29.5306	-14.6749
0.219868	-1.19508	0	0	0	-30.8707	0	-55.5018	-244.047	-66.4462		-1.14097	-1.2624	-1.10527	-0.914599	-8.23198	-0.477732	-26.5598	-29.7478	-14.7341
0.220758	-0.96864	0	0	0	-30.8833	0	-54.8602	-224.989	-66.1191		-1.14183	-1.2624	-1.10527	-0.914599	-8.25947	-0.477732	-26.6086	-29.9481	-14.7929
0.221649	-0.742205	0	0	0	-31.0342	0	-54.7093	-204.383	-68.6099		-1.14249	-1.2624	-1.10527	-0.914599	-8.28709	-0.477732	-26.6573	-30.13	-14.854
0.222539	-0.50319	0	0	0	-31.2103	0	-54.898	-189.413	-75.9061		-1.14294	-1.2624	-1.10527	-0.914599	-8.31486	-0.477732	-26.7061	-30.2985	-14.9215
0.223429	-0.251595	0	0	0	-31.55	0	-54.9986	-176.934	-87.7563		-1.14316	-1.2624	-1.10527	-0.914599	-8.34294	-0.477732	-26.7551	-30.456	-14.9996
0.224319	0	0	0	0	-31.7261	0	-54.898	-162.845	-103.129		-1.14316	-1.2624	-1.10527	-0.914599	-8.37118	-0.477732	-26.8039	-30.6009	-15.0914
0.225209	0	0	0	0	-31.9525	0	-54.747	-150.114	-121.596		-1.14316	-1.2624	-1.10527	-0.914599	-8.39962	-0.477732	-26.8527	-30.7345	-15.1996
0.226099	0	-0.251595	0	0	-32.2545	0	-54.5206	-138.943	-140.792		-1.14316	-1.26263	-1.10527	-0.914599	-8.42832	-0.477732	-26.9012	-30.8582	-15.3249
0.226989	0	-0.251595	0	0	-32.506	0	-53.8287	-127.294	-159.888		-1.14316	-1.26285	-1.10527	-0.914599	-8.45726	-0.477732	-26.9491	-30.9715	-15.4672
0.22788	0	-0.251595	0	0	-32.3425	0	-53.1746	-117.029	-178.318		-1.14316	-1.26307	-1.10527	-0.914599	-8.48604	-0.477732	-26.9964	-31.0756	-15.6259
0.22877	0	-0.251595	0	0	-32.1916	0	-52.7594	-108.035	-196.936		-1.14316	-1.2633	-1.10527	-0.914599	-8.51469	-0.477732	-27.0434	-31.1718	-15.8012
0.22966	0	-0.251595	0	0	-32.0532	0	-52.3695	-98.839	-213.579		-1.14316	-1.26352	-1.10527	-0.914599	-8.54322	-0.477732	-27.09	-31.2598	-15.9913
0.23055	0	0	0	0	-31.9148	0	-52.1053	-91.3289	-228.373		-1.14316	-1.26352	-1.10527	-0.914599	-8.57162	-0.477732	-27.1364	-31.341	-16.1945
0.23144	0	0	0	0	-31.8016	0	-51.904	-84.2591	-244.726		-1.14316	-1.26352	-1.10527	-0.914599	-8.59993	-0.477732	-27.1826	-31.416	-16.4123
0.23233	0	0	0	0	-32.2041	0	-51.6776	-77.4283	-259.256		-1.14316	-1.26352	-1.10527	-0.914599	-8.62859	-0.477732	-27.2285	-31.4849	-16.6431
0.233221	0	0	0	0	-32.3551	0	-51.7656	-71.7674	-272.188		-1.14316	-1.26352	-1.10527	-0.914599	-8.65738	-0.477732	-27.2746	-31.5488	-16.8853
0.234111	0	0	0	0	-32.506	0	-51.753	-67.6413	-286.126		-1.14316	-1.26352	-1.10527	-0.914599	-8.68631	-0.477732	-27.3207	-31.609	-17.14
0.235001	0	0	0	0	-32.3928	0	-51.3505	-63.7415	-300.756		-1.14316	-1.26352	-1.10527	-0.914599	-8.71514	-0.477732	-27.3664	-31.6657	-17.4077
0.235891	0	0	0	0	-32.1538	0	-51.0863	-61.0998	-307.235		-1.14316	-1.26352	-1.10527	-0.914599	-8.74376	-0.477732	-27.4119	-31.7201	-17.6811
0.236781	0	0	0	0	-31.2858	0	-50.8096	-58.4832	-313.059		-1.14316	-1.26352	-1.10527	-0.914599	-8.7716	-0.477732	-27.4571	-31.7722	-17.9597
0.237671	0	0	0	0	-30.2794	0	-50.2938	-55.5773	-322.934		-1.14316	-1.26352	-1.10527	-0.914599	-8.79855	-0.477732	-27.5018	-31.8216	-18.2471
0.238562	0	0	0	0	-29.4617	0	-49.7277	-52.8349	-334.206		-1.14316	-1.26352	-1.10527	-0.914599	-8.82477	-0.477732	-27.5461	-31.8687	-18.5446
0.239452	0	0	0	0	-29.5498	0	-49.6019	-50.6586	-346.685		-1.14316	-1.26352	-1.10527	-0.914599	-8.85107	-0.477732	-27.5902	-31.9137	-18.8531
0.240342	0	0	0	0	-31.4745	0	-49.3	-48.3817	-369.857		-1.14316	-1.26352	-1.10527	-0.914599	-8.87909	-0.477732	-27.6341	-31.9568	-19.1823
0.241232	0	0	0	0	-37.5379	0	-49.1868	-46.1928	-391.632		-1.14316	-1.26352	-1.10527	-0.914599	-8.91249	-0.477732	-27.6779	-31.9979	-19.5309
0.242122	0	0	0	0	-50.3441	0	-49.2748	-44.3813	-403.91		-1.14316	-1.26352	-1.10527	-0.914599	-8.9573	-0.477732	-27.7217	-32.0374	-19.8903
0.243012	0	0	0	0	-67.8048	0	-49.5013	-42.7082	-413.295		-1.14316	-1.26352	-1.10527	-0.914599	-9.01765	-0.477732	-27.7658	-32.0754	-20.2582
0.243902	0	0	0	0	-86.7373	0	-49.6397	-41.2238	-414.226		-1.14316	-1.26352	-1.10527	-0.914599	-9.09484	-0.477732	-27.81	-32.1121	-20.6268
0.244793	0	0	0	0	-110.978	0	-50.1051	-39.7646	-408.477		-1.14316	-1.26352	-1.10527	-0.914599	-9.19361	-0.477732	-27.8546	-32.1475	-20.9904
0.245683	0	0	0	0	-135.144	0	-50.2057	-38.0789	-400.828		-1.14316	-1.26352	-1.10527	-0.914599	-9.31389	-0.477732	-27.8993	-32.1814	-21.3471
0.246573	0	0	0	0	-157.435	0	-50.1177	-36.1416	-392.098		-1.14316	-1.26352	-1.10527	-0.914599	-9.45401	-0.477732	-27.9439	-32.2136	-21.6961
0.247463	0	0	0	0	-182.494	0	-50.168	-34.0911	-375.656		-1.14316	-1.26352	-1.10527	-0.914599	-9.61643	-0.477732	-27.9885	-32.2439	-22.0304
0.248353	0	0	0	0	-205.062	0	-50.4699	-31.8896	-352.459		-1.14316	-1.26352	-1.10527	-0.914599	-9.79894	-0.477732	-28.0334	-32.2723	-22.3441
0.249243	0	0	0	0	-228.825	0	-50.4699	-29.9398	-316.594		-1.14316	-1.26352	-1.10527	-0.914599	-10.0026	-0.477732	-28.0783	-32.2989	-22.6259
0.250134	0	0	0	0	-250.941	0	-50.2435	-27.9144	-280.05		-1.14316	-1.26352	-1.10527	-0.914599	-10.2259	-0.477732	-28.1231	-32.3238	-22.8751
0.251024	0	0	0	0	-271.332	0	-50.3064	-25.9394	-245.204		-1.14316	-1.26352	-1.10527	-0.914599	-10.4674	-0.477732	-28.1678	-32.3469	-23.0933
0.251914	0	0	0	0	-285.246	0	-50.0674	-24.1279	-214.887		-1.14316	-1.26352	-1.10527	-0.914599	-10.7213	-0.477732	-28.2124	-32.3683	-23.2846
0.252804	0	0	0	0	-307.059	0	-49.9038	-22.3668	-195.565		-1.14316	-1.26352	-1.10527	-0.914599	-10.9946	-0.477732	-28.2568	-32.3882	-23.4586
0.253694	0	0	0	0	-331.866	0	-49.9164	-20.8446	-183.299		-1.14316	-1.26352	-1.10527	-0.914599	-11.2899	-0.477732	-28.3012	-32.4068	-23.6218
0.254584	0	0	0	0	-350.409	0	-50.168	-19.3728	-169.537		-1.14316	-1.26352	-1.10527	-0.914599	-11.6018	-0.477732	-28.3459	-32.424	-23.7727
0.255474	0	0	0	0	-373.845	0	-50.1806	-17.8255	-156.555		-1.14316	-1.26352	-1.10527	-0.914599	-11.9345	-0.477732	-28.3905	-32.4399	-23.912
0.256365	0	0	0	0	-392.211	0	-50.1554	-16.1272	-144.403		-1.14316	-1.26352	-1.10527	-0.914599	-12.2836	-0.477732	-28.4352	-32.4543	-24.0405
0.257255	0	0	0	0	-401.57	0	-50.5831	-14.6806	-132.087		-1.14316	-1.26352	-1.10527	-0.914599	-12.641	-0.477732	-28.4802	-32.4673	-24.1581
0.258145	0	0	0	0	-408.112	0	-50.7089	-13.3723	-121.533		-1.14316	-1.26352	-1.10527	-0.914599	-13.0042	-0.477732	-28.5253	-32.4792	-24.2662
0.259035	0	0	0	0	-406.439	0	-50.558	-12.5923	-113.935		-1.14316	-1.26352	-1.10527	-0.914599	-13.3659	-0.477732	-28.5703	-32.4904	-24.3676
0.259925	0	0	0	0	-392.199	0	-50.3064	-12.0388	-106.223		-1.14316	-1.26352	-1.10527	-0.914599	-13.715	-0.477732	-28.6151	-32.5011	-24.4622
0.260815	0	0	0	0	-376.939	0	-50.168	-11.7998	-98.5874		-1.14316	-1.26352	-1.10527	-0.914599	-14.0505	-0.477732	-28.6598	-32.5116	-24.5499
0.261706	0	0	0	0	-367.228	0	-49.1868	-11.5985	-90.8131		-1.14316	-1.26352	-1.10527	-0.914599	-14.3773	-0.477732	-28.7035	-32.522	-24.6307
0.262596	0	0	0	0	-336.609	0	-48.7339	-11.4098	-84.9761		-1.14316	-1.26352	-1.10527	-0.914599	-14.6769	-0.477732	-28.7469	-32.5321	-24.7064
0.263486	0	0	0	0	-318.657	0	-48.822	-11.0702	-79.6423		-1.14316	-1.26352	-1.10527	-0.914599	-14.9605	-0.477732	-28.7904	-32.542	-24.7773
0.264376	0	0	0	0	-304.002	0	-48.6962	-10.8186	-75.4533		-1.14316	-1.26352	-1.10527	-0.914599	-15.231	-0.477732	-28.8337	-32.5516	-24.8444
0.265266	0	0	0	0	-291.02	0	-48.7842	-10.5796	-71.1762		-1.14316	-1.26352	-1.10527	-0.914599	-15.49	-0.477732	-28.8771	-32.561	-24.9078
0.266156	0	0	0	0	-274.691	0	-48.583	-10.3154	-67.6413		-1.14316	-1.26352	-1.10527	-0.914599	-15.7345	-0.477732	-28.9204	-32.5702	-24.968
0.267046	0	0	0	0	-266.099	0	-48.3565	-10.0638	-64.6599		-1.14316	-1.26352	-1.10527	-0.914599	-15.9714	-0.477732	-28.9634	-32.5792	-25.0255
0.267937	0	0	0	0	-247.67	0	-48.3188	-9.7493	-62.1942		-1.14316	-1.26352	-1.10527	-0.914599	-16.1918	-0.477732	-29.0064	-32.5878	-25.0809
0.268827	0	0	0	0	-227.819	0	-48.5075	-9.61092	-60.0808		-1.14316	-1.26352	-1.10527	-0.914599	-16.3945	-0.477732	-29.0496	-32.5964	-25.1343
0.269717	0	0	0	0	-209.176	0	-48.6207	-9.43481	-57.9926		-1.14316	-1.26352	-1.10527	-0.914599	-16.5807	-0.477732	-29.0928	-32.6048	-25.1859
0.270607	0	0	0	0	-188.746	0	-49.2371	-9.27127	-55.615		-1.14316	-1.26352	-1.10527	-0.914599	-16.7487	-0.477732	-29.1367	-32.613	-25.2354
0.271497	0	0	0	0	-164.329	0	-49.5642	-8.9442	-52.9984		-1.14316	-1.26352	-1.10527	-0.914599	-16.8949	-0.477732	-29.1808	-32.621	-25.2826
0.272387	0	0	0	0	-150.466	0	-49.7403	-8.76808	-49.9667		-1.14316	-1.26352	-1.10527	-0.914599	-17.0289	-0.477732	-29.225	-32.6288	-25.3271
0.273278	0	0	0	0	-137.371	0	-49.8535	-8.42843	-46.8218		-1.14316	-1.26352	-1.10527	-0.914599	-17.1511	-0.477732	-29.2694	-32.6363	-25.3688
0.274168	0	0	0	0	-122.665	0	-50.1932	-8.15167	-43.7272		-1.14316	-1.26352	-1.10527	-0.914599	-17.2603	-0.477732	-29.3141	-32.6436	-25.4077
0.275058	0	0	0	0	-107.62	0	-50.3315	-7.8875	-40.8716		-1.14316	-1.26352	-1.10527	-0.914599	-17.3561	-0.477732	-29.3589	-32.6506	-25.444
0.275948	0	0	0	0	-99.2038	0	-50.2057	-7.68622	-37.6134		-1.14316	-1.26352	-1.10527	-0.914599	-17.4444	-0.477732	-29.4036	-32.6574	-25.4775
0.276838	0	0	0	0	-89.14	0	-49.778	-7.58558	-33.9653		-1.14316	-1.26352	-1.10527	-0.914599	-17.5237	-0.477732	-29.4479	-32.6642	-25.5078
0.277728	0	0	0	0	-79.6675	0	-49.3881	-7.51011	-29.9398		-1.14316	-1.26352	-1.10527	-0.914599	-17.5946	-0.477732	-29.4918	-32.6709	-25.5344
0.278618	0	0	0	0	-72.1196	0	-48.432	-7.35915	-24.9708		-1.14316	-1.26352	-1.10527	-0.914599	-17.6588	-0.477732	-29.5349	-32.6774	-25.5566
0.279509	0	0	0	0	-63.8925	0	-47.2243	-7.17045	-20.354		-1.14316	-1.26352	-1.10527	-0.914599	-17.7156	-0.477732	-29.5769	-32.6838	-25.5747
0.280399	0	0	0	0	-55.9798	0.01258	-45.9664	-6.96918	-16.3914		-1.14316	-1.26352	-1.10527	-0.914599	-17.7655	-0.477721	-29.6179	-32.69	-25.5893
0.281289	0	0	0	0	-46.7966	0.402552	-44.7839	-6.59178	-13.7497		-1.14316	-1.26352	-1.10527	-0.914599	-17.8071	-0.477362	-29.6577	-32.6959	-25.6016
0.282179	0	0	0	0	-36.3051	2.30209	-44.1046	-6.27729	-12.0011		-1.14316	-1.26352	-1.10527	-0.914599	-17.8394	-0.475314	-29.697	-32.7014	-25.6122
0.283069	0	0	0	0	-25.0085	4.62934	-44.2681	-5.9628	-11.8879		-1.14316	-1.26352	-1.10527	-0.914599	-17.8617	-0.471194	-29.7364	-32.7067	-25.6228
0.283959	0	0	0	0	-12.8062	6.9566	-47.1866	-5.72378	-11.9004		-1.14316	-1.26352	-1.10527	-0.914599	-17.8731	-0.465002	-29.7784	-32.7118	-25.6334
0.28485	0	0	0	0	1.16992	9.34675	-54.7219	-5.67346	-11.9508		-1.14316	-1.26352	-1.10527	-0.914599	-17.872	-0.456684	-29.8271	-32.7169	-25.6441
0.28574	0	0	0	0	15.9008	11.3469	-68.6476	-5.62314	-11.913		-1.14316	-1.26352	-1.10527	-0.914599	-17.8579	-0.446585	-29.8882	-32.7219	-25.6547
0.28663	0	0	0	0	30.3172	11.8375	-88.3224	-5.50993	-11.913		-1.14316	-1.26352	-1.10527	-0.914599	-17.8309	-0.436049	-29.9668	-32.7268	-25.6653
0.28752	0	0	0	0	43.8404	11.9759	-113.444	-5.43445	-11.9382		-1.14316	-1.26352	-1.10527	-0.914599	-17.7919	-0.425391	-30.0677	-32.7316	-25.6759
0.28841	0	0	0	0	54.9735	12.1269	-140.931	-5.53508	-11.9885		-1.14316	-1.26352	-1.10527	-0.914599	-17.743	-0.414598	-30.1932	-32.7366	-25.6866
0.2893	0	0	0	0	62.1439	12.303	-170.116	-5.53508	-12.0388		-1.14316	-1.26352	-1.10527	-0.914599	-17.6877	-0.403648	-30.3446	-32.7415	-25.6973
0.29019	0	0	0	0	64.6347	12.4414	-197.401	-5.35897	-12.4539		-1.14316	-1.26352	-1.10527	-0.914599	-17.6301	-0.392575	-30.5203	-32.7463	-25.7084
0.291081	0	0	0	0	60.6092	12.5168	-220.498	-5.27091	-13.02		-1.14316	-1.26352	-1.10527	-0.914599	-17.5762	-0.381435	-30.7165	-32.751	-25.7199
0.291971	0	0	0	0	52.8349	12.4917	-241.015	-5.44703	-13.9384		-1.14316	-1.26352	-1.10527	-0.914599	-17.5292	-0.370318	-30.931	-32.7558	-25.7323
0.292861	0	0	0	0	43.8027	12.4539	-262.363	-5.53508	-15.2341		-1.14316	-1.26352	-1.10527	-0.914599	-17.4902	-0.359234	-31.1645	-32.7607	-25.7459
0.293751	0	0	0	0	34.8585	12.2778	-283.447	-5.6483	-16.5298		-1.14316	-1.26352	-1.10527	-0.914599	-17.4592	-0.348307	-31.4168	-32.7658	-25.7606
0.294641	0	0	0	0	27.3735	12.1143	-303.172	-6.10117	-17.6368		-1.14316	-1.26352	-1.10527	-0.914599	-17.4348	-0.337525	-31.6866	-32.7712	-25.7763
0.295531	0	0	0	0	21.8636	12.0262	-318.33	-6.26471	-18.4922		-1.14316	-1.26352	-1.10527	-0.914599	-17.4153	-0.326822	-31.9699	-32.7768	-25.7928
0.296422	0	0	0	0	17.121	11.9256	-336.596	-6.30245	-18.7816		-1.14316	-1.26352	-1.10527	-0.914599	-17.4001	-0.316208	-32.2695	-32.7824	-25.8095
0.297312	0	0	0	0	12.152	11.8124	-339.011	-6.25213	-18.3664		-1.14316	-1.26352	-1.10527	-0.914599	-17.3893	-0.305695	-32.5712	-32.7879	-25.8258
0.298202	0	0	0	0	7.44721	11.7621	-342.647	-6.21439	-17.5739		-1.14316	-1.26352	-1.10527	-0.914599	-17.3827	-0.295226	-32.8762	-32.7935	-25.8415
0.299092	0	0	0	0	3.25815	11.6992	-349.075	-6.18923	-16.3662		-1.14316	-1.26352	-1.10527	-0.914599	-17.3798	-0.284814	-33.1868	-32.799	-25.856
0.299982	0	0	0	0	0.578668	11.5482	-359.013	-6.51631	-14.9447		-1.14316	-1.26352	-1.10527	-0.914599	-17.3792	-0.274536	-33.5064	-32.8048	-25.8693
0.300872	0	0	0	0	-1.83664	11.3092	-369.87	-6.8308	-13.8251		-1.14316	-1.26352	-1.10527	-0.914599	-17.3809	-0.264471	-33.8355	-32.8108	-25.8816
0.301763	0	0	0.037739	0	-3.49717	11.1079	-388.462	-7.19561	-12.9571		-1.14316	-1.26352	-1.10523	-0.914599	-17.384	-0.254585	-34.1813	-32.8173	-25.8932
0.302653	0	0	1.39635	0	-4.49097	10.8563	-406.64	-7.49753	-12.4539		-1.14316	-1.26352	-1.10399	-0.914599	-17.388	-0.244923	-34.5432	-32.8239	-25.9043
0.303543	0	0	3.67328	0	-4.7174	10.6676	-418.012	-7.56042	-12.1772		-1.14316	-1.26352	-1.10072	-0.914599	-17.3922	-0.235429	-34.9152	-32.8307	-25.9151
0.304433	0	0	6.06343	0	-4.40291	10.2776	-426.378	-7.39689	-12.1772		-1.14316	-1.26352	-1.09532	-0.914599	-17.3961	-0.226282	-35.2947	-32.8372	-25.9259
0.305323	0	0	8.47874	0	-2.99398	9.90025	-424.038	-7.03207	-12.064		-1.14316	-1.26352	-1.08778	-0.914599	-17.3988	-0.21747	-35.6721	-32.8435	-25.9367
0.306213	0	0	10.8941	0	-1.33345	9.30901	-429.762	-6.8308	-12.0137		-1.14316	-1.26352	-1.07808	-0.914599	-17.4	-0.209185	-36.0546	-32.8496	-25.9474
0.307103	0	0	12.1143	0	-0.339653	8.51648	-425.61	-6.66726	-12.0137		-1.14316	-1.26352	-1.0673	-0.914599	-17.4003	-0.201606	-36.4334	-32.8555	-25.9581
0.307994	0	0	12.4791	0	-0.075478	7.43463	-429.988	-6.6421	-12.0137		-1.14316	-1.26352	-1.05619	-0.914599	-17.4003	-0.194989	-36.816	-32.8614	-25.9687
0.308884	0	0	12.8439	0	0	6.16407	-419.056	-6.61694	-12.0137		-1.14316	-1.26352	-1.04476	-0.914599	-17.4003	-0.189503	-37.189	-32.8673	-25.9794
0.309774	0	0	13.2842	0	0	4.76772	-405.483	-6.74274	-12.0388		-1.14316	-1.26352	-1.03294	-0.914599	-17.4003	-0.18526	-37.5499	-32.8733	-25.9902
0.310664	0	0	13.5484	0	0	3.48459	-378.99	-6.69242	-11.9633		-1.14316	-1.26352	-1.02088	-0.914599	-17.4003	-0.182158	-37.8872	-32.8793	-26.0008
0.311554	0	0	13.7622	0	0	2.36499	-364.448	-6.66726	-11.8501		-1.14316	-1.26352	-1.00863	-0.914599	-17.4003	-0.180054	-38.2115	-32.8852	-26.0113
0.312444	-0.251595	0	13.8503	0	0	1.45925	-335.288	-6.78048	-11.7369		-1.14339	-1.26352	-0.996307	-0.914599	-17.4003	-0.178755	-38.51	-32.8912	-26.0218
0.313335	-0.50319	0	13.7748	0	0	0.95606	-328.558	-6.81822	-11.7369		-1.14384	-1.26352	-0.984047	-0.914599	-17.4003	-0.177904	-38.8024	-32.8973	-26.0322
0.314225	-0.754784	0	13.5106	0	0	0.628987	-323.727	-6.6421	-11.6866		-1.14451	-1.26352	-0.972023	-0.914599	-17.4003	-0.177344	-39.0905	-32.9032	-26.0426
0.315115	-1.00638	0	13.259	0	0	0.377392	-317.815	-6.37793	-11.7243		-1.1454	-1.26352	-0.960222	-0.914599	-17.4003	-0.177008	-39.3733	-32.9089	-26.0531
0.316005	-1.25797	0	12.8817	0	0	0.188696	-303.486	-6.02569	-11.825		-1.14652	-1.26352	-0.948758	-0.914599	-17.4003	-0.17684	-39.6434	-32.9143	-26.0636
0.316895	-1.50957	0	12.5294	0	0	0.062899	-291.246	-5.7741	-11.9382		-1.14787	-1.26352	-0.937606	-0.914599	-17.4003	-0.176784	-39.9027	-32.9194	-26.0742
0.317785	-1.76116	0	12.2652	0	0	0	-269.03	-5.91248	-11.9382		-1.14943	-1.26352	-0.92669	-0.914599	-17.4003	-0.176784	-40.1421	-32.9247	-26.0848
0.318675	-2.01276	0	12.0891	0	0	0	-247.657	-5.9628	-11.9759		-1.15123	-1.26352	-0.915931	-0.914599	-17.4003	-0.176784	-40.3625	-32.93	-26.0955
0.319566	-2.01276	0	12.0388	0	0	0	-230.461	-6.08859	-12.0011		-1.15302	-1.26352	-0.905216	-0.914599	-17.4003	-0.176784	-40.5676	-32.9354	-26.1062
0.320456	-2.26435	0	12.0388	0	0	0	-208.874	-6.25213	-11.9382		-1.15503	-1.26352	-0.894502	-0.914599	-17.4003	-0.176784	-40.7535	-32.9409	-26.1168
0.321346	-2.26435	0	12.064	0	0	-0.415131	-190.659	-6.13891	-11.8627		-1.15705	-1.26352	-0.883765	-0.914599	-17.4003	-0.177154	-40.9232	-32.9464	-26.1274
0.322236	-2.01276	0	12.064	0	0	-2.1134	-173.953	-6.05086	-11.7872		-1.15884	-1.26352	-0.873028	-0.914599	-17.4003	-0.179035	-41.078	-32.9518	-26.1379
0.323126	-1.74858	0	12.064	0	0	-4.44065	-158.366	-6.07601	-11.7369		-1.16039	-1.26352	-0.862291	-0.914599	-17.4003	-0.182987	-41.219	-32.9572	-26.1483
0.324016	-1.736	0	11.9885	0	0	-6.79306	-145.661	-6.18923	-11.6866		-1.16194	-1.26352	-0.851621	-0.914599	-17.4003	-0.189033	-41.3486	-32.9627	-26.1587
0.324907	-1.47183	0	11.7998	0	0	-9.20837	-135.056	-6.32761	-11.7243		-1.16325	-1.26352	-0.84112	-0.914599	-17.4003	-0.197228	-41.4688	-32.9683	-26.1691
0.325797	-1.20765	0	11.6614	0	0	-11.8879	-124.678	-6.44083	-11.7243		-1.16432	-1.26352	-0.830741	-0.914599	-17.4003	-0.207808	-41.5798	-32.9741	-26.1796
0.326687	-1.19508	0	11.4098	0	0	-14.429	-116.199	-6.12633	-11.7872		-1.16539	-1.26352	-0.820586	-0.914599	-17.4003	-0.22065	-41.6832	-32.9795	-26.1901
0.327577	-1.19508	0	11.1079	0	0	-16.7814	-108.437	-6.12633	-11.8124		-1.16645	-1.26352	-0.8107	-0.914599	-17.4003	-0.235586	-41.7797	-32.985	-26.2006
0.328467	-1.1825	0	11.0324	0	0	-20.2785	-100.084	-5.95022	-11.825		-1.1675	-1.26352	-0.800881	-0.914599	-17.4003	-0.253633	-41.8688	-32.9903	-26.2111
0.329357	-1.16992	0	11.0324	0	0	-24.8324	-91.7692	-5.69862	-11.8627		-1.16855	-1.26352	-0.791062	-0.914599	-17.4003	-0.275734	-41.9504	-32.9953	-26.2217
0.330247	-1.15734	0	10.6676	0	-0.050319	-31.2229	-83.5924	-5.82442	-11.8753		-1.16958	-1.26352	-0.781568	-0.914599	-17.4004	-0.303523	-42.0248	-33.0005	-26.2322
0.331138	-1.14476	0	10.1518	0	-0.113218	-40.9974	-76.6106	-6.03827	-11.7746		-1.17059	-1.26352	-0.772533	-0.914599	-17.4005	-0.34001	-42.093	-33.0059	-26.2427
0.332028	-1.13218	0	9.61092	0	-0.138377	-57.6529	-70.5975	-5.837	-11.6363		-1.1716	-1.26352	-0.763979	-0.914599	-17.4006	-0.391321	-42.1559	-33.0111	-26.2531
0.332918	-1.13218	0	8.99451	0	-0.138377	-80.5984	-65.6662	-5.72378	-11.5105		-1.17261	-1.26352	-0.755974	-0.914599	-17.4007	-0.463054	-42.2143	-33.0162	-26.2633
0.333808	-1.13218	0	8.25231	0	-0.138377	-112.085	-62.3829	-5.49735	-11.3218		-1.17362	-1.26352	-0.74863	-0.914599	-17.4008	-0.56281	-42.2698	-33.0211	-26.2734
0.334698	-0.905741	0	7.58558	0	-0.100638	-154.643	-60.1437	-4.95642	-11.2211		-1.17442	-1.26352	-0.741878	-0.914599	-17.4009	-0.700442	-42.3233	-33.0255	-26.2834
0.335588	-0.679306	0	6.96918	0	-0.037739	-189.212	-57.6655	-4.50355	-11.1205		-1.17503	-1.26352	-0.735676	-0.914599	-17.401	-0.868841	-42.3747	-33.0295	-26.2933
0.336479	-0.452871	0	6.01312	0	-0.01258	-219.63	-55.2125	-4.22679	-11.0702		-1.17543	-1.26352	-0.730324	-0.914599	-17.401	-1.06431	-42.4238	-33.0333	-26.3031
0.337369	-0.226435	0	4.88094	0	-0.037739	-258.149	-52.7343	-4.00036	-11.0828		-1.17563	-1.26352	-0.72598	-0.914599	-17.401	-1.29406	-42.4707	-33.0368	-26.313
0.338259	0	0	3.6607	0	-0.037739	-289.837	-50.5328	-3.83682	-11.1582		-1.17563	-1.26352	-0.722722	-0.914599	-17.401	-1.55202	-42.5157	-33.0402	-26.3229
0.339149	0	0	2.7927	0	-0.062899	-304.757	-48.0798	-3.86198	-11.2085		-1.17563	-1.26352	-0.720237	-0.914599	-17.4011	-1.82325	-42.5585	-33.0437	-26.3329
0.340039	0	0	1.94986	0	-0.062899	-322.645	-46.218	-3.82424	-11.2966		-1.17563	-1.26352	-0.718501	-0.914599	-17.4012	-2.11041	-42.5996	-33.0471	-26.3429
0.340929	0	0	1.43409	0	-0.113218	-334.156	-44.092	-3.86198	-11.3469		-1.17563	-1.26352	-0.717225	-0.914599	-17.4013	-2.4078	-42.6389	-33.0505	-26.353
0.341819	0	0	0.717045	0	-0.176116	-344.635	-42.444	-3.81166	-11.3595		-1.17563	-1.26352	-0.716587	-0.914599	-17.4014	-2.71453	-42.6767	-33.0539	-26.3632
0.34271	0	0	0.226435	0	-0.264175	-349.604	-40.7206	-3.98778	-11.284		-1.17563	-1.26352	-0.716385	-0.914599	-17.4016	-3.02568	-42.7129	-33.0575	-26.3732
0.3436	0	0	-0.389972	0	-0.327073	-359.793	-38.884	-3.79908	-11.0828		-1.17563	-1.26352	-0.716732	-0.914599	-17.4019	-3.34589	-42.7475	-33.0608	-26.3831
0.34449	0	0	-0.830263	0	-0.427711	-365.454	-36.8712	-3.76134	-10.8941		-1.17563	-1.26352	-0.717471	-0.914599	-17.4023	-3.67115	-42.7803	-33.0642	-26.3928
0.34538	0	0	-1.1825	0	-0.46545	-387.783	-35.173	-3.64812	-10.8563		-1.17563	-1.26352	-0.718524	-0.914599	-17.4027	-4.01627	-42.8116	-33.0674	-26.4024
0.34627	0	0	-1.23281	0	-0.440291	-391.809	-33.4621	-3.44685	-10.9066		-1.17563	-1.26352	-0.719621	-0.914599	-17.4031	-4.36498	-42.8414	-33.0705	-26.4121
0.34716	0	0	-1.25797	0	-0.402552	-397.079	-31.4997	-3.32105	-10.957		-1.17563	-1.26352	-0.72074	-0.914599	-17.4035	-4.71838	-42.8694	-33.0735	-26.4219
0.348051	0	0	-1.25797	0.427711	-0.389972	-404.866	-29.4114	-3.42169	-11.0953		-1.17563	-1.26352	-0.72186	-0.914218	-17.4038	-5.07872	-42.8956	-33.0765	-26.4318
0.348941	0	0	-1.25797	2.47821	-0.364812	-419.786	-27.1848	-3.45943	-11.3092		-1.17563	-1.26352	-0.72298	-0.912012	-17.4042	-5.45232	-42.9198	-33.0796	-26.4418
0.349831	0	0	-1.25797	4.75514	-0.327073	-422.553	-25.2475	-3.39653	-11.4224		-1.17563	-1.26352	-0.724099	-0.90778	-17.4044	-5.8284	-42.9423	-33.0826	-26.452
0.350721	0	0	-1.25797	7.00692	-0.352233	-429.309	-23.4612	-3.29589	-11.4224		-1.17563	-1.26352	-0.725219	-0.901544	-17.4048	-6.21048	-42.9632	-33.0855	-26.4622
0.351611	0	0	-1.50957	9.38449	-0.327073	-433.988	-21.7001	-2.86818	-11.4601		-1.17563	-1.26352	-0.726562	-0.893192	-17.4051	-6.59673	-42.9825	-33.0881	-26.4724
0.352501	0	0	-1.50957	11.3595	-0.339653	-438.806	-20.0521	-2.46563	-11.523		-1.17563	-1.26352	-0.727906	-0.883082	-17.4054	-6.98727	-43.0003	-33.0903	-26.4826
0.353391	0	0	-1.50957	11.9508	-0.402552	-440.92	-18.53	-2.18887	-11.5105		-1.17563	-1.26352	-0.729249	-0.872446	-17.4057	-7.37969	-43.0168	-33.0922	-26.4929
0.354282	0	0	-1.50957	12.3407	-0.364812	-438.291	-16.7814	-2.10082	-11.5356		-1.17563	-1.26352	-0.730593	-0.861463	-17.406	-7.76977	-43.0317	-33.0941	-26.5031
0.355172	0	0	-1.76116	12.8439	-0.276754	-437.108	-15.0957	-2.15114	-11.5482		-1.17563	-1.26352	-0.73216	-0.850031	-17.4063	-8.15879	-43.0452	-33.096	-26.5134
0.356062	0	0	-1.50957	13.2087	-0.289334	-434.643	-14.039	-2.25177	-11.5734		-1.17563	-1.26352	-0.733504	-0.838276	-17.4065	-8.54563	-43.0577	-33.098	-26.5237
0.356952	0	0	-1.50957	13.561	-0.201276	-423.912	-13.2968	-2.37757	-11.6614		-1.17563	-1.26352	-0.734847	-0.826206	-17.4067	-8.92291	-43.0695	-33.1001	-26.5341
0.357842	0	0	-1.53473	13.5484	-0.062899	-415.521	-12.7055	-2.15114	-11.674		-1.17563	-1.26352	-0.736213	-0.814148	-17.4068	-9.29272	-43.0808	-33.1021	-26.5445
0.358732	0	0	-1.57247	13.4603	-0.050319	-409.156	-12.6049	-2.00018	-11.6488		-1.17563	-1.26352	-0.737613	-0.802169	-17.4068	-9.65687	-43.092	-33.1038	-26.5548
0.359623	0	0	-1.38377	13.2087	-0.100638	-397.583	-12.3785	-1.81148	-11.6614		-1.17563	-1.26352	-0.738844	-0.790413	-17.4069	-10.0107	-43.1031	-33.1054	-26.5652
0.360513	0	0	-1.44667	12.8817	-0.239015	-390.689	-11.8753	-1.55989	-11.5859		-1.17563	-1.26352	-0.740132	-0.778948	-17.4071	-10.3584	-43.1136	-33.1068	-26.5755
0.361403	0	0	-1.48441	12.542	-0.339653	-388.022	-11.6488	-1.22023	-11.4098		-1.17563	-1.26352	-0.741453	-0.767786	-17.4074	-10.7038	-43.124	-33.1079	-26.5857
0.362293	0	0	-1.45925	12.2149	-0.415131	-382.349	-11.4727	-1.23281	-11.3218		-1.17563	-1.26352	-0.742752	-0.756915	-17.4078	-11.0441	-43.1342	-33.109	-26.5958
0.363183	0	0	-1.42151	11.9256	-0.427711	-367.567	-10.8689	-1.13218	-11.284		-1.17563	-1.26352	-0.744017	-0.746301	-17.4082	-11.3712	-43.1439	-33.11	-26.6058
0.364073	0	0	-1.35861	11.7369	-0.377392	-358.699	-10.5418	-1.08186	-11.2589		-1.17563	-1.26352	-0.745226	-0.735855	-17.4085	-11.6904	-43.1533	-33.111	-26.6158
0.364964	0	0	-1.09444	11.5105	-0.201276	-343.414	-10.0764	-1.22023	-11.196		-1.17563	-1.26352	-0.7462	-0.725611	-17.4087	-11.9961	-43.1622	-33.1121	-26.6258
0.365854	0	0	-0.98122	11.2463	-0.138377	-327.4	-9.59834	-1.40893	-11.1834		-1.17563	-1.26352	-0.747073	-0.715602	-17.4088	-12.2875	-43.1708	-33.1133	-26.6357
0.366744	0	0	-0.930901	11.0953	-0.150957	-309.411	-9.10773	-1.38377	-11.2589		-1.17563	-1.26352	-0.747902	-0.705727	-17.4089	-12.5628	-43.1789	-33.1146	-26.6458
0.367634	0	0	-0.98122	10.9444	-0.226435	-298.291	-8.86872	-1.23281	-11.2337		-1.17563	-1.26352	-0.748775	-0.695986	-17.4091	-12.8283	-43.1868	-33.1157	-26.6558
0.368524	0	0	-1.22023	10.8312	-0.402552	-285.371	-8.36553	-1.20765	-11.2463		-1.17563	-1.26352	-0.749861	-0.686346	-17.4095	-13.0823	-43.1942	-33.1167	-26.6658
0.369414	0	0	-2.27693	10.8941	-0.49061	-274.138	-8.12651	-1.19508	-11.3847		-1.17563	-1.26352	-0.751888	-0.676651	-17.4099	-13.3263	-43.2014	-33.1178	-26.6759
0.370304	0	0	-3.58523	10.9192	-0.628987	-260.187	-7.90008	-1.14476	-11.5734		-1.17563	-1.26352	-0.755078	-0.666933	-17.4105	-13.5578	-43.2085	-33.1188	-26.6862
0.371195	0	0	-5.18285	10.957	-0.717045	-248.84	-7.86234	-1.09444	-11.6488		-1.17563	-1.26352	-0.759691	-0.657181	-17.4111	-13.7793	-43.2155	-33.1198	-26.6966
0.372085	0	0	-6.8308	10.9821	-0.679306	-239.858	-7.43463	-1.10702	-11.7872		-1.17563	-1.26352	-0.765771	-0.647407	-17.4117	-13.9928	-43.2221	-33.1208	-26.7071
0.372975	0	0	-8.5668	10.9821	-0.666726	-226.096	-7.20819	-1.0567	-11.9382		-1.17563	-1.26352	-0.773395	-0.637633	-17.4123	-14.194	-43.2285	-33.1217	-26.7177
0.373865	0	0	-9.8122	10.8815	-0.704465	-215.881	-7.15787	-0.993799	-12.1143		-1.17563	-1.26352	-0.782128	-0.627948	-17.413	-14.3861	-43.2349	-33.1226	-26.7285
0.374755	0	0	-10.7054	10.7683	-0.616407	-207.427	-6.98175	-0.779944	-12.2904		-1.17563	-1.26352	-0.791656	-0.618365	-17.4135	-14.5708	-43.2411	-33.1233	-26.7394
0.375645	0	0	-11.3218	10.6802	-0.515769	-196.621	-6.52888	-0.654146	-12.8313		-1.17563	-1.26352	-0.801732	-0.608859	-17.414	-14.7458	-43.2469	-33.1239	-26.7508
0.376536	0	0	-11.7872	10.5796	-0.654146	-186.08	-6.27729	-0.566088	-13.4352		-1.17563	-1.26352	-0.812223	-0.599443	-17.4146	-14.9114	-43.2525	-33.1244	-26.7628
0.377426	0	0	-12.1394	10.3405	-0.591248	-182.23	-6.06343	-0.364812	-14.1145		-1.17563	-1.26352	-0.823027	-0.59024	-17.4151	-15.0735	-43.2579	-33.1247	-26.7753
0.378316	0	0	-13.3345	10.1644	-0.50319	-174.619	-5.72378	-0.163537	-14.9951		-1.17563	-1.26352	-0.834895	-0.581194	-17.4155	-15.229	-43.263	-33.1249	-26.7887
0.379206	0	0	-14.9447	9.95057	-0.47803	-166.669	-5.47219	-0.150957	-15.9763		-1.17563	-1.26352	-0.848195	-0.572338	-17.416	-15.3773	-43.2678	-33.125	-26.8029
0.380096	0	0	-16.9575	9.58576	-0.49061	-163.788	-5.38413	-0.100638	-16.5675		-1.17563	-1.26352	-0.863288	-0.563807	-17.4164	-15.5231	-43.2726	-33.1251	-26.8176
0.380986	0	0	-19.1338	9.09515	-0.402552	-163.864	-5.25833	-0.050319	-17.121		-1.17563	-1.26352	-0.880317	-0.555712	-17.4168	-15.6689	-43.2773	-33.1251	-26.8329
0.381876	0	0	-21.4862	8.37811	-0.364812	-163.813	-5.04448	-0.050319	-17.5236		-1.17563	-1.26352	-0.899439	-0.548255	-17.4171	-15.8147	-43.2818	-33.1252	-26.8485
0.382767	0	0	-23.7631	7.30883	-0.402552	-164.304	-4.95642	-0.100638	-17.7123		-1.17563	-1.26352	-0.920588	-0.541751	-17.4174	-15.9609	-43.2862	-33.1253	-26.8642
0.383657	0	0	-26.2539	6.18923	-0.440291	-164.442	-4.72998	-0.113218	-17.7249		-1.17563	-1.26352	-0.943954	-0.536242	-17.4178	-16.1073	-43.2904	-33.1254	-26.88
0.384547	0	0	-28.946	4.98158	-0.46545	-161.65	-4.54129	-0.150957	-17.7626		-1.17563	-1.26352	-0.969716	-0.531808	-17.4182	-16.2511	-43.2945	-33.1255	-26.8958
0.385437	0	0	-32.4054	3.82424	-0.528349	-154.718	-4.61676	-0.201276	-17.6242		-1.17563	-1.26352	-0.998557	-0.528405	-17.4187	-16.3888	-43.2986	-33.1257	-26.9115
0.386327	0	0	-36.5441	2.69206	-0.578668	-146.328	-4.64192	-0.213856	-17.4229		-1.17563	-1.26352	-1.03108	-0.526009	-17.4192	-16.5191	-43.3027	-33.1259	-26.927
0.387217	0	0	-41.4125	1.7989	-0.616407	-142.415	-4.66708	-0.176116	-16.9575		-1.17563	-1.26352	-1.06794	-0.524408	-17.4198	-16.6458	-43.3069	-33.126	-26.9421
0.388108	0	0	-47.8156	1.1196	-0.540929	-138.943	-4.72998	-0.150957	-16.253		-1.17563	-1.26352	-1.11049	-0.523412	-17.4203	-16.7695	-43.3111	-33.1261	-26.9566
0.388998	0	0	-56.8856	0.591248	-0.427711	-137.597	-4.75514	-0.100638	-15.1963		-1.17563	-1.26352	-1.16112	-0.522885	-17.4206	-16.892	-43.3153	-33.1262	-26.9701
0.389888	0	0	-70.132	0.176116	-0.289334	-135.937	-4.67966	-0.138377	-14.2025		-1.17563	-1.26352	-1.22354	-0.522729	-17.4209	-17.0129	-43.3195	-33.1264	-26.9827
0.390778	0	0	-91.6182	0.062899	-0.327073	-136.226	-4.91868	-0.226435	-13.2842		-1.17563	-1.26352	-1.30508	-0.522673	-17.4212	-17.1342	-43.3239	-33.1266	-26.9946
0.391668	0.062899	0	-123.206	0.050319	-0.427711	-134.905	-4.91868	-0.276754	-12.5546		-1.17558	-1.26352	-1.41473	-0.522628	-17.4216	-17.2542	-43.3282	-33.1268	-27.0057
0.392558	1.23281	0	-162.882	0	-0.49061	-131.458	-5.08221	-0.301914	-11.9885		-1.17448	-1.26352	-1.5597	-0.522628	-17.422	-17.3712	-43.3328	-33.1271	-27.0164
0.393448	3.03172	0	-194.294	0	-0.540929	-127.018	-5.25833	-0.301914	-11.2463		-1.17178	-1.26352	-1.73262	-0.522628	-17.4225	-17.4843	-43.3374	-33.1273	-27.0264
0.394339	5.32123	0	-210.497	0	-0.566088	-122.602	-5.34639	-0.226435	-9.27127		-1.16705	-1.26352	-1.91996	-0.522628	-17.423	-17.5934	-43.3422	-33.1275	-27.0347
0.395229	7.12013	0	-213.176	0	-0.50319	-120.552	-5.14511	-0.138377	-6.88112		-1.16071	-1.26352	-2.10969	-0.522628	-17.4234	-17.7007	-43.3468	-33.1277	-27.0408
0.396119	8.61712	0	-201.427	0	-0.339653	-115.885	-5.15769	-0.088058	-4.49097		-1.15304	-1.26352	-2.28896	-0.522628	-17.4237	-17.8038	-43.3514	-33.1278	-27.0448
0.397009	9.30901	0	-177.525	0	-0.339653	-113.671	-5.15769	-0.088058	-2.20145		-1.14475	-1.26352	-2.44696	-0.522628	-17.424	-17.905	-43.356	-33.1278	-27.0467
0.397899	9.58576	0	-159.184	0	-0.301914	-111.192	-5.19543	-0.088058	-0.452871		-1.13622	-1.26352	-2.58863	-0.522628	-17.4243	-18.004	-43.3606	-33.1279	-27.0472
0.398789	9.43481	0	-144.969	0	-0.327073	-110.475	-5.17027	-0.100638	-0.01258		-1.12783	-1.26352	-2.71765	-0.522628	-17.4246	-18.1023	-43.3652	-33.128	-27.0472
0.39968	9.69898	0	-141.384	0	-0.327073	-104.11	-5.25833	-0.113218	0		-1.11919	-1.26352	-2.84348	-0.522628	-17.4249	-18.1949	-43.3699	-33.1281	-27.0472
0.40057	10.3154	0	-142.214	0	-0.389972	-102.6	-5.17027	-0.163537	0		-1.11001	-1.26352	-2.97006	-0.522628	-17.4252	-18.2863	-43.3745	-33.1282	-27.0472
0.40146	10.567	0	-145.598	0	-0.314493	-99.619	-5.06963	-0.239015	0		-1.10061	-1.26352	-3.09964	-0.522628	-17.4255	-18.3749	-43.379	-33.1285	-27.0472
0.40235	10.8689	0	-143.359	0	-0.339653	-96.9646	-5.00674	-0.276754	0		-1.09094	-1.26352	-3.22723	-0.522628	-17.4258	-18.4612	-43.3834	-33.1287	-27.0472
0.40324	11.1456	0	-147.913	0	-0.364812	-93.7065	-5.06963	-0.251595	0		-1.08102	-1.26352	-3.35887	-0.522628	-17.4261	-18.5446	-43.3879	-33.1289	-27.0472
0.40413	11.4601	0	-151.045	0	-0.314493	-88.8255	-5.14511	-0.226435	0		-1.07082	-1.26352	-3.4933	-0.522628	-17.4264	-18.6237	-43.3925	-33.1291	-27.0472
0.40502	11.6614	0	-148.554	0	-0.213856	-84.1459	-5.23317	-0.176116	0		-1.06044	-1.26352	-3.62551	-0.522628	-17.4266	-18.6986	-43.3972	-33.1293	-27.0472
0.405911	11.9004	0	-145.548	0	-0.264175	-81.4035	-5.45961	-0.075478	0		-1.04985	-1.26352	-3.75505	-0.522628	-17.4268	-18.771	-43.402	-33.1294	-27.0472
0.406801	11.7872	0	-147.397	0	-0.264175	-78.7869	-5.6483	-0.062899	0		-1.03936	-1.26352	-3.88623	-0.522628	-17.4271	-18.8411	-43.4071	-33.1294	-27.0472
0.407691	11.4853	0	-150.353	0	-0.201276	-78.3089	-5.7741	-0.088058	0		-1.02913	-1.26352	-4.02005	-0.522628	-17.4273	-18.9108	-43.4122	-33.1295	-27.0472
0.408581	11.3092	0	-148.755	0	-0.163537	-78.4347	-6.08859	-0.088058	-0.01258		-1.01907	-1.26352	-4.15244	-0.522628	-17.4274	-18.9806	-43.4176	-33.1296	-27.0472
0.409471	11.1331	0	-154.982	-0.025159	-0.176116	-78.4976	-6.31503	-0.100638	-0.01258		-1.00916	-1.26352	-4.29037	-0.52265	-17.4276	-19.0505	-43.4232	-33.1297	-27.0472
0.410361	10.8941	0	-153.8	-0.088058	-0.100638	-79.3027	-6.25213	-0.138377	-0.01258		-0.999464	-1.26352	-4.42726	-0.522729	-17.4277	-19.1211	-43.4288	-33.1298	-27.0472
0.411252	10.4915	0	-162.014	-0.163537	-0.062899	-78.0573	-5.92506	-0.226435	-0.01258		-0.990127	-1.26352	-4.57145	-0.522874	-17.4277	-19.1905	-43.4341	-33.13	-27.0472
0.412142	10.2525	0	-172.015	-0.201276	-0.025159	-79.1391	-5.62314	-0.377392	-0.01258		-0.981002	-1.26352	-4.72454	-0.523053	-17.4277	-19.261	-43.4391	-33.1303	-27.0472
0.413032	10.0386	0	-192.294	-0.276754	-0.025159	-76.7993	-5.33381	-0.528349	0		-0.972068	-1.26352	-4.89568	-0.5233	-17.4278	-19.3293	-43.4438	-33.1308	-27.0472
0.413922	9.6864	0	-209.704	-0.47803	-0.100638	-74.774	-5.18285	-0.553509	0		-0.963447	-1.26352	-5.08232	-0.523725	-17.4278	-19.3959	-43.4484	-33.1313	-27.0472
0.414812	9.53544	0	-235.769	-0.98122	-0.251595	-72.5222	-5.20801	-0.515769	0		-0.95496	-1.26352	-5.29216	-0.524598	-17.4281	-19.4604	-43.4531	-33.1317	-27.0472
0.415702	9.38449	0	-259.646	-1.93728	-0.327073	-71.4278	-5.37155	-0.402552	-0.01258		-0.946608	-1.26352	-5.52324	-0.526322	-17.4284	-19.524	-43.4579	-33.1321	-27.0472
0.416592	9.22095	0	-282.843	-3.38395	-0.327073	-67.6916	-5.57282	-0.239015	-0.037739		-0.938401	-1.26352	-5.77497	-0.529334	-17.4287	-19.5842	-43.4628	-33.1323	-27.0473
0.417483	8.74292	0	-296.53	-5.49735	-0.327073	-69.2515	-5.57282	-0.113218	-0.050319		-0.93062	-1.26352	-6.03888	-0.534227	-17.4289	-19.6459	-43.4678	-33.1324	-27.0473
0.418373	8.32779	0	-309.613	-7.64848	-0.226435	-69.1005	-5.5854	-0.088058	-0.050319		-0.923208	-1.26352	-6.31444	-0.541034	-17.4291	-19.7074	-43.4727	-33.1325	-27.0474
0.419263	7.79944	0	-316.494	-9.4977	-0.075478	-68.937	-5.49735	-0.075478	-0.050319		-0.916267	-1.26352	-6.59612	-0.549487	-17.4292	-19.7687	-43.4776	-33.1326	-27.0474
0.420153	7.62332	0	-321.475	-10.8815	0	-68.9118	-5.37155	-0.062899	-0.062899		-0.909482	-1.26352	-6.88223	-0.559171	-17.4292	-19.8301	-43.4824	-33.1326	-27.0475
0.421043	7.30883	0	-320.016	-12.1269	0	-67.8803	-5.25833	-0.050319	-0.062899		-0.902977	-1.26352	-7.16704	-0.569964	-17.4292	-19.8905	-43.4871	-33.1327	-27.0475
0.421933	7.10755	0	-316.632	-13.6868	-0.025159	-66.3455	-5.23317	-0.025159	-0.062899		-0.896652	-1.26352	-7.44885	-0.582146	-17.4292	-19.9495	-43.4918	-33.1327	-27.0476
0.422824	6.78048	0	-319.551	-15.7498	-0.050319	-65.6159	-5.14511	0	-0.113218		-0.890617	-1.26352	-7.73325	-0.596163	-17.4293	-20.0079	-43.4963	-33.1327	-27.0477
0.423714	6.23955	0	-321.526	-18.0645	-0.050319	-65.5027	-4.9061	0	-0.113218		-0.885064	-1.26352	-8.0194	-0.61224	-17.4293	-20.0662	-43.5007	-33.1327	-27.0478
0.424604	5.50993	0	-319.827	-21.0207	-0.075478	-65.5908	-4.75514	0	-0.088058		-0.88016	-1.26352	-8.30405	-0.630949	-17.4294	-20.1246	-43.5049	-33.1327	-27.0478
0.425494	4.72998	0	-316.821	-25.1846	-0.075478	-66.5091	-4.61676	0	-0.075478		-0.87595	-1.26352	-8.58602	-0.653363	-17.4295	-20.1838	-43.509	-33.1327	-27.0479
0.426384	3.77392	0	-314.443	-29.6504	-0.075478	-67.6413	-4.46581	0	-0.100638		-0.872591	-1.26352	-8.86587	-0.679752	-17.4295	-20.244	-43.513	-33.1327	-27.048
0.427274	2.99398	0	-302.694	-35.5252	-0.050319	-67.7042	-4.44065	0	-0.088058		-0.869927	-1.26352	-9.13527	-0.711369	-17.4296	-20.3042	-43.517	-33.1327	-27.0481
0.428165	2.1763	0	-291.951	-43.614	-0.050319	-66.9494	-4.57902	-0.01258	-0.088058		-0.86799	-1.26352	-9.39511	-0.750186	-17.4296	-20.3638	-43.521	-33.1327	-27.0482
0.429055	1.38377	0	-282.541	-56.0679	-0.025159	-66.5091	-4.59161	-0.025159	-0.100638		-0.866758	-1.26352	-9.64657	-0.800086	-17.4296	-20.423	-43.5251	-33.1327	-27.0483
0.429945	0.779944	0	-273.32	-74.6356	-0.025159	-65.4901	-4.74256	-0.025159	-0.088058		-0.866064	-1.26352	-9.88982	-0.866512	-17.4297	-20.4813	-43.5294	-33.1327	-27.0483
0.430835	0.427711	0	-261.973	-101.632	0	-64.8989	-4.6545	-0.025159	-0.100638		-0.865683	-1.26352	-10.123	-0.956964	-17.4297	-20.5391	-43.5335	-33.1328	-27.0484
0.431725	0.100638	0	-250.211	-139.258	-0.01258	-64.924	-4.44065	-0.025159	-0.062899		-0.865594	-1.26352	-10.3457	-1.0809	-17.4297	-20.5968	-43.5374	-33.1328	-27.0485
0.432615	0.025159	0	-243.619	-184.432	-0.01258	-64.685	-4.20163	-0.01258	-0.062899		-0.865572	-1.26352	-10.5625	-1.24505	-17.4297	-20.6544	-43.5412	-33.1328	-27.0485
0.433505	0.01258	0	-229.618	-213.679	-0.037739	-64.0686	-4.0381	-0.075478	-0.050319		-0.86556	-1.26352	-10.7668	-1.43522	-17.4297	-20.7114	-43.5448	-33.1329	-27.0486
0.434396	0	0	-221.001	-227.794	-0.075478	-63.968	-3.69844	-0.176116	-0.050319		-0.86556	-1.26352	-10.9635	-1.63796	-17.4298	-20.7684	-43.5481	-33.133	-27.0486
0.435286	0	0	-211.792	-229.153	-0.075478	-63.4396	-3.56007	-0.201276	0		-0.86556	-1.26352	-11.152	-1.8419	-17.4298	-20.8248	-43.5512	-33.1332	-27.0486
0.436176	0	0	-204.874	-213.264	-0.075478	-62.8735	-3.43427	-0.251595	0		-0.86556	-1.26352	-11.3344	-2.03171	-17.4299	-20.8808	-43.5543	-33.1334	-27.0486
0.437066	0	0	-199.879	-189.124	-0.075478	-62.8735	-3.44685	-0.264175	0		-0.86556	-1.26352	-11.5123	-2.20003	-17.43	-20.9367	-43.5574	-33.1337	-27.0486
0.437956	0	0	-196.068	-180.947	-0.050319	-63.0119	-3.53491	-0.301914	0		-0.86556	-1.26352	-11.6868	-2.36107	-17.43	-20.9928	-43.5605	-33.1339	-27.0486
0.438846	0	0	-193.25	-181.123	-0.01258	-62.6345	-3.35879	-0.377392	0.100638		-0.86556	-1.26352	-11.8588	-2.52227	-17.43	-21.0486	-43.5635	-33.1343	-27.0485
0.439737	0	0	-188.935	-184.62	-0.01258	-62.3075	-3.23299	-0.855422	1.47183		-0.86556	-1.26352	-12.0269	-2.68658	-17.4301	-21.104	-43.5664	-33.135	-27.0472
0.440627	0	0	-185.199	-196.37	0	-62.0559	-3.20783	-1.53473	3.71102		-0.86556	-1.26352	-12.1917	-2.86135	-17.4301	-21.1592	-43.5692	-33.1364	-27.0439
0.441517	0	0	-182.658	-193.816	0	-61.4646	-3.24557	-2.76754	6.06343		-0.86556	-1.26352	-12.3543	-3.03385	-17.4301	-21.214	-43.5721	-33.1388	-27.0385
0.442407	0	0	-177.488	-200.118	0	-60.9866	-3.1072	-4.30227	8.44101		-0.86556	-1.26352	-12.5123	-3.21196	-17.4301	-21.2682	-43.5749	-33.1427	-27.031
0.443297	0	0	-173.487	-203.226	0	-60.8105	-3.25815	-6.03827	10.7557		-0.86556	-1.26352	-12.6667	-3.39283	-17.4301	-21.3224	-43.5778	-33.148	-27.0214
0.444187	0	0	-173.55	-207.314	0	-60.4834	-3.23299	-7.573	11.7998		-0.86556	-1.26352	-12.8211	-3.57734	-17.4301	-21.3762	-43.5807	-33.1548	-27.0109
0.445077	0	0	-173.663	-204.974	0	-60.3576	-3.01914	-9.10773	11.9759		-0.86556	-1.26352	-12.9757	-3.75976	-17.4301	-21.4299	-43.5834	-33.1629	-27.0003
0.445968	0	0	-168.569	-213.73	-0.01258	-60.0934	-2.7927	-10.2022	12.0388		-0.86556	-1.26352	-13.1257	-3.94998	-17.4301	-21.4834	-43.5858	-33.172	-26.9896
0.446858	0	0	-166.858	-210.61	-0.075478	-60.0934	-2.75496	-10.9066	12.064		-0.86556	-1.26352	-13.2742	-4.13743	-17.4301	-21.5369	-43.5883	-33.1817	-26.9788
0.447748	0	0	-165.386	-208.434	-0.075478	-59.8418	-2.69206	-11.3721	12.064		-0.86556	-1.26352	-13.4214	-4.32293	-17.4302	-21.5901	-43.5907	-33.1918	-26.9681
0.448638	0	0	-162.719	-207.239	-0.075478	-59.1248	-2.64174	-11.6992	12.0137		-0.86556	-1.26352	-13.5662	-4.50737	-17.4303	-21.6427	-43.593	-33.2022	-26.9574
0.449528	0	0	-162.404	-225.806	-0.075478	-58.2316	-2.55369	-11.7998	11.9256		-0.86556	-1.26352	-13.7108	-4.70834	-17.4303	-21.6946	-43.5953	-33.2127	-26.9468
0.450418	0	0	-163.272	-252.941	-0.062899	-58.0807	-2.41531	-11.8375	11.8753		-0.86556	-1.26352	-13.8561	-4.93346	-17.4304	-21.7463	-43.5975	-33.2233	-26.9362
0.451309	0	0	-163.989	-281.459	0	-57.1498	-2.21403	-11.8753	11.7998		-0.86556	-1.26352	-14.002	-5.18396	-17.4304	-21.7971	-43.5994	-33.2338	-26.9257
0.452199	0	0	-164.065	-314.28	0	-56.3824	-2.1763	-11.8753	11.7369		-0.86556	-1.26352	-14.1481	-5.46367	-17.4304	-21.8473	-43.6014	-33.2444	-26.9153
0.453089	0	0	-161.952	-336.684	0	-55.854	-2.39015	-11.9256	11.7746		-0.86556	-1.26352	-14.2922	-5.76331	-17.4304	-21.897	-43.6035	-33.255	-26.9048
0.453979	-0.062899	0	-160.681	-345.314	0	-55.9798	-2.41531	-11.9508	11.523		-0.865616	-1.26352	-14.4352	-6.07064	-17.4304	-21.9468	-43.6056	-33.2656	-26.8945
0.454869	-0.138377	0	-158.316	-348.081	0	-55.1747	-2.22661	-11.9885	11.284		-0.865739	-1.26352	-14.5761	-6.38044	-17.4304	-21.9959	-43.6076	-33.2763	-26.8845
0.455759	-0.226435	0	-159.851	-348.006	0	-54.5206	-2.15114	-12.0137	10.9947		-0.865941	-1.26352	-14.7184	-6.69016	-17.4304	-22.0445	-43.6095	-33.287	-26.8747
0.456649	-0.301914	0	-157.134	-341.188	0	-54.0551	-1.91212	-12.0388	10.6802		-0.86621	-1.26352	-14.8582	-6.99382	-17.4304	-22.0926	-43.6112	-33.2977	-26.8652
0.45754	-0.301914	0	-157.599	-344.735	-0.01258	-53.8413	-1.62279	-12.0137	10.3405		-0.866478	-1.26352	-14.9985	-7.30063	-17.4304	-22.1405	-43.6127	-33.3084	-26.856
0.45843	-0.251595	0	-153.058	-348.723	-0.050319	-52.9859	-1.67311	-12.0388	10.1896		-0.866702	-1.26352	-15.1347	-7.611	-17.4304	-22.1877	-43.6142	-33.3191	-26.8469
0.45932	-0.226435	0	-149.925	-346.043	-0.050319	-53.4765	-1.8618	-12.0388	9.88767		-0.866904	-1.26352	-15.2681	-7.91898	-17.4305	-22.2352	-43.6158	-33.3298	-26.8381
0.46021	-0.213856	0	-146.592	-336.005	-0.050319	-53.3004	-1.78632	-12.0137	9.40964		-0.867094	-1.26352	-15.3986	-8.21802	-17.4305	-22.2827	-43.6174	-33.3405	-26.8297
0.4611	-0.213856	0	-143.749	-326.96	-0.050319	-52.8601	-1.68569	-11.9633	9.19579		-0.867284	-1.26352	-15.5265	-8.50901	-17.4306	-22.3297	-43.6189	-33.3512	-26.8216
0.46199	-0.213856	0	-138.39	-317.462	-0.037739	-52.2185	-1.54731	-11.7243	8.86872		-0.867475	-1.26352	-15.6497	-8.79156	-17.4306	-22.3762	-43.6203	-33.3616	-26.8137
0.462881	-0.201276	0	-134.176	-305.059	0	-51.9166	-1.39635	-11.3595	8.52906		-0.867654	-1.26352	-15.7691	-9.06306	-17.4306	-22.4224	-43.6215	-33.3717	-26.8061
0.463771	-0.201276	0	-129.898	-298.19	-0.025159	-50.9228	-1.20765	-9.88767	8.18941		-0.867833	-1.26352	-15.8847	-9.32845	-17.4306	-22.4677	-43.6226	-33.3805	-26.7988
0.464661	-0.138377	0	-125.797	-292.869	-0.050319	-51.2624	-1.13218	-7.64848	7.96298		-0.867956	-1.26352	-15.9967	-9.5891	-17.4307	-22.5134	-43.6236	-33.3873	-26.7917
0.465551	-0.075478	0	-120.64	-287.523	-0.050319	-51.4386	-1.14476	-5.43445	7.28367		-0.868023	-1.26352	-16.1041	-9.845	-17.4307	-22.5591	-43.6246	-33.3922	-26.7852
0.466441	-0.150957	0	-118.501	-284.554	-0.050319	-51.8788	-1.10702	-3.29589	6.73016		-0.868158	-1.26352	-16.2095	-10.0982	-17.4308	-22.6053	-43.6256	-33.3951	-26.7792
0.467331	-0.427711	0	-118.161	-279.534	-0.050319	-52.1179	-1.0567	-1.20765	6.22697		-0.868538	-1.26352	-16.3147	-10.347	-17.4308	-22.6517	-43.6266	-33.3962	-26.7737
0.468221	-0.805103	0	-116.79	-271.295	-0.025159	-52.143	-0.95606	-0.050319	5.52251		-0.869255	-1.26352	-16.4186	-10.5885	-17.4308	-22.6981	-43.6274	-33.3962	-26.7688
0.469112	-1.27055	0	-117.18	-262.703	0	-51.753	-0.94348	0.289334	4.56644		-0.870386	-1.26352	-16.5229	-10.8223	-17.4308	-22.7442	-43.6283	-33.396	-26.7647
0.470002	-1.97502	0	-115.079	-254.74	0	-51.4008	-0.893162	0.842843	3.7236		-0.872144	-1.26352	-16.6253	-11.049	-17.4308	-22.7899	-43.6291	-33.3952	-26.7614
0.470892	-2.9185	0	-112.211	-241.732	0	-51.3505	-0.817683	1.72342	2.78012		-0.874741	-1.26352	-16.7252	-11.2642	-17.4308	-22.8356	-43.6298	-33.3937	-26.7589
0.471782	-4.42807	0	-108.211	-230.939	0	-51.187	-0.767364	2.83044	1.82406		-0.878682	-1.26352	-16.8215	-11.4697	-17.4308	-22.8812	-43.6305	-33.3912	-26.7573
0.472672	-6.06343	0	-105.871	-221.517	0	-51.0989	-0.842843	3.79908	1.0567		-0.884078	-1.26352	-16.9157	-11.6668	-17.4308	-22.9266	-43.6312	-33.3878	-26.7564
0.473562	-7.83718	0	-100.814	-212.61	0	-51.0108	-0.855422	4.40291	0.679306		-0.891054	-1.26352	-17.0055	-11.8561	-17.4308	-22.972	-43.632	-33.3839	-26.7558
0.474453	-9.48512	0	-99.9586	-211.252	0	-51.2247	-0.817683	4.40291	0.377392		-0.899495	-1.26352	-17.0944	-12.0441	-17.4308	-23.0176	-43.6327	-33.3799	-26.7554
0.475343	-10.8437	0	-101.217	-208.446	0	-51.1115	-0.842843	3.74876	0.138377		-0.909146	-1.26352	-17.1845	-12.2296	-17.4308	-23.0631	-43.6335	-33.3766	-26.7553
0.476233	-11.5859	0	-100.55	-202.081	0	-51.8663	-0.842843	2.84302	0.01258		-0.919458	-1.26352	-17.274	-12.4094	-17.4308	-23.1093	-43.6342	-33.3741	-26.7553
0.477123	-12.5797	0	-98.9522	-199.188	0	-52.533	-0.805103	1.77374	0		-0.930654	-1.26352	-17.3621	-12.5867	-17.4308	-23.156	-43.6349	-33.3725	-26.7553
0.478013	-13.7622	0	-96.7382	-201.917	0	-52.8601	-0.729625	1.00638	0		-0.942902	-1.26352	-17.4482	-12.7664	-17.4308	-23.2031	-43.6356	-33.3716	-26.7553
0.478903	-15.3347	0	-94.7254	-194.382	0	-52.6714	-0.628987	0.591248	0		-0.95655	-1.26352	-17.5325	-12.9394	-17.4308	-23.25	-43.6361	-33.3711	-26.7553
0.479793	-17.2468	0	-90.2345	-190.835	0	-53.3758	-0.452871	0.402552	0		-0.9719	-1.26352	-17.6128	-13.1093	-17.4308	-23.2975	-43.6365	-33.3707	-26.7553
0.480684	-18.9828	0	-88.5488	-189.602	0	-51.9543	-0.339653	0.201276	0		-0.988794	-1.26352	-17.6916	-13.278	-17.4308	-23.3437	-43.6368	-33.3705	-26.7553
0.481574	-20.4547	0	-87.4795	-184.583	0	-50.7718	-0.188696	0.088058	0		-1.007	-1.26352	-17.7694	-13.4423	-17.4308	-23.3889	-43.637	-33.3705	-26.7553
0.482464	-21.8887	0	-86.1209	-175.009	0	-49.8283	-0.100638	0.062899	0		-1.02648	-1.26352	-17.8461	-13.5981	-17.4308	-23.4332	-43.6371	-33.3704	-26.7553
0.483354	-23.2977	0	-84.4352	-170.745	-0.025159	-49.0861	-0.100638	0.062899	0		-1.04721	-1.26352	-17.9212	-13.75	-17.4309	-23.4769	-43.6372	-33.3703	-26.7553
0.484244	-25.084	0	-84.1836	-162.983	-0.025159	-47.5011	-0.163537	0.037739	0		-1.06954	-1.26352	-17.9962	-13.8951	-17.4309	-23.5192	-43.6373	-33.3703	-26.7553
0.485134	-27.3987	0	-83.1521	-156.177	-0.025159	-47.3627	-0.226435	0	0		-1.09392	-1.26352	-18.0702	-14.0341	-17.4309	-23.5614	-43.6375	-33.3703	-26.7553
0.486025	-30.1285	0	-82.0325	-150.479	-0.025159	-46.9853	-0.377392	0	0		-1.12074	-1.26352	-18.1432	-14.168	-17.4309	-23.6032	-43.6379	-33.3703	-26.7553
0.486915	-32.7702	0	-81.9822	-149.057	-0.025159	-46.6457	-0.47803	0	0		-1.1499	-1.26352	-18.2161	-14.3007	-17.4309	-23.6447	-43.6383	-33.3703	-26.7553
0.487805	-35.7139	0	-82.7369	-145.95	0	-46.6205	-0.578668	0	2.39015		-1.18169	-1.26352	-18.2898	-14.4306	-17.4309	-23.6862	-43.6388	-33.3703	-26.7532
0.488695	-39.2362	-0.251595	-82.8753	-143.334	0	-46.4444	-0.578668	0	6.30245		-1.21661	-1.26374	-18.3635	-14.5581	-17.4309	-23.7275	-43.6393	-33.3703	-26.7475
0.489585	-43.0353	-0.50319	-82.1205	-141.321	0	-46.1173	-0.528349	0	10.9947		-1.25491	-1.26419	-18.4366	-14.6839	-17.4309	-23.7686	-43.6398	-33.3703	-26.7378
0.490475	-46.7337	-0.754784	-81.3029	-137.132	0	-46.545	-0.377392	0	16.4417		-1.2965	-1.26486	-18.509	-14.8059	-17.4309	-23.81	-43.6401	-33.3703	-26.7231
0.491365	-52.1304	-1.1825	-81.1016	-134.238	0	-46.5702	-0.289334	0	22.329		-1.3429	-1.26592	-18.5812	-14.9254	-17.4309	-23.8514	-43.6404	-33.3703	-26.7033
0.492256	-57.9926	-1.29571	-79.9065	-130.943	0	-46.1551	-0.239015	0	25.1846		-1.39451	-1.26707	-18.6523	-15.042	-17.4309	-23.8925	-43.6406	-33.3703	-26.6808
0.493146	-65.6662	-0.767364	-79.6046	-130.188	0	-46.1425	-0.176116	0	25.7004		-1.45296	-1.26775	-18.7231	-15.1578	-17.4309	-23.9336	-43.6408	-33.3703	-26.658
0.494036	-78.3089	0.352233	-80.3091	-125.709	0	-46.2683	-0.113218	0	24.6185		-1.52265	-1.26744	-18.7946	-15.2697	-17.4309	-23.9748	-43.6409	-33.3703	-26.6361
0.494926	-97.4552	2.23919	-81.4916	-122.3	0	-45.5009	-0.138377	0	22.09		-1.60939	-1.26545	-18.8671	-15.3785	-17.4309	-24.0153	-43.641	-33.3703	-26.6164
0.495816	-124.3	4.28969	-80.6236	-118.174	0	-45.3248	-0.201276	0	18.7564		-1.72001	-1.26163	-18.9389	-15.4837	-17.4309	-24.0556	-43.6412	-33.3703	-26.5997
0.496706	-157.222	5.91248	-82.1205	-116.337	0	-45.5387	-0.150957	0	16.0014		-1.85994	-1.25637	-19.012	-15.5873	-17.4309	-24.0961	-43.6413	-33.3703	-26.5855
0.497597	-168.128	6.96918	-81.9696	-110.438	0	-45.2367	-0.150957	0	14.0264		-2.00958	-1.25016	-19.0849	-15.6856	-17.4309	-24.1364	-43.6414	-33.3703	-26.573
0.498487	-178.079	7.71138	-81.0009	-110.362	0	-44.7965	-0.163537	0	12.8565		-2.16807	-1.2433	-19.157	-15.7838	-17.4309	-24.1762	-43.6416	-33.3703	-26.5615
0.499377	-170.883	7.8875	-79.0888	-114.048	0	-44.3562	-0.113218	0	12.303		-2.32015	-1.23628	-19.2274	-15.8853	-17.4309	-24.2157	-43.6417	-33.3703	-26.5506
0.500267	-149.372	8.20199	-78.9882	-116.275	0	-43.8027	-0.025159	0	12.1646		-2.45309	-1.22898	-19.2977	-15.9888	-17.4309	-24.2547	-43.6417	-33.3703	-26.5398
0.501157	-123.709	8.32779	-76.9503	-120.401	0	-43.8027	-0.01258	0	12.0891		-2.56319	-1.22157	-19.3662	-16.0959	-17.4309	-24.2937	-43.6417	-33.3703	-26.529
0.502047	-119.973	8.59196	-75.5413	-123.52	0	-43.7901	-0.01258	0	12.0514		-2.66997	-1.21392	-19.4334	-16.2059	-17.4309	-24.3327	-43.6417	-33.3703	-26.5183
0.502938	-106.991	8.66744	-74.8998	-127.647	0	-43.7901	-0.01258	0	12.0891		-2.76519	-1.20621	-19.5001	-16.3195	-17.4309	-24.3716	-43.6417	-33.3703	-26.5075
0.503828	-104.173	8.83098	-75.1765	-127.194	0	-44.092	-0.037739	0	12.3407		-2.85791	-1.19835	-19.567	-16.4327	-17.4309	-24.4109	-43.6418	-33.3703	-26.4965
0.504718	-100.487	8.46617	-74.5853	-125.672	0	-44.4442	-0.088058	0	12.6552		-2.94734	-1.19081	-19.6334	-16.5445	-17.4309	-24.4504	-43.6418	-33.3703	-26.4853
0.505608	-94.65	8.5039	-74.7237	-117.243	0	-44.1171	-0.113218	0	13.4729		-3.03158	-1.18325	-19.6999	-16.6489	-17.4309	-24.4897	-43.6419	-33.3703	-26.4733
0.506498	-90.1338	8.49132	-74.9878	-114.274	0	-43.853	-0.113218	0	14.7686		-3.1118	-1.17569	-19.7666	-16.7506	-17.4309	-24.5287	-43.642	-33.3703	-26.4601
0.507388	-90.8383	8.05103	-75.642	-107.091	0	-43.463	-0.113218	0	16.3914		-3.19264	-1.16852	-19.8339	-16.8459	-17.4309	-24.5674	-43.6421	-33.3703	-26.4455
0.508278	-87.3537	7.34657	-75.3275	-102.651	0	-43.224	-0.113218	0	17.8255		-3.27039	-1.16198	-19.901	-16.9372	-17.4309	-24.6059	-43.6422	-33.3703	-26.4297
0.509169	-88.272	7.19561	-75.0381	-100.374	0	-42.9472	-0.075478	0	19.2093		-3.34895	-1.15558	-19.9678	-17.0266	-17.4309	-24.6441	-43.6423	-33.3703	-26.4126
0.510059	-92.4611	6.84338	-74.5601	-103.745	0	-42.8466	-0.100638	0	20.1779		-3.43124	-1.14949	-20.0341	-17.1189	-17.4309	-24.6822	-43.6424	-33.3703	-26.3946
0.510949	-88.6997	6.79306	-73.6921	-104.273	0	-43.1485	-0.201276	0	20.8446		-3.51018	-1.14344	-20.0997	-17.2117	-17.4309	-24.7206	-43.6426	-33.3703	-26.3761
0.511839	-81.3783	6.86854	-71.9184	-104.827	0	-43.0982	-0.427711	0	21.3478		-3.58261	-1.13733	-20.1637	-17.305	-17.4309	-24.759	-43.643	-33.3703	-26.3571
0.512729	-76.4219	6.99434	-71.2642	-104.601	0	-42.8969	-0.641567	0	21.8887		-3.65062	-1.13111	-20.2271	-17.3981	-17.4309	-24.7972	-43.6435	-33.3703	-26.3376
0.513619	-74.0066	7.05723	-70.7107	-103.229	0	-42.5069	-0.830263	0	22.5303		-3.71649	-1.12483	-20.2901	-17.49	-17.4309	-24.835	-43.6443	-33.3703	-26.3175
0.51451	-70.6478	7.03207	-69.4905	-101.179	-0.01258	-42.205	-1.03154	0	23.1845		-3.77937	-1.11857	-20.3519	-17.58	-17.431	-24.8726	-43.6452	-33.3703	-26.2969
0.5154	-66.0688	6.71758	-68.8741	-101.493	-0.062899	-41.6138	-1.19508	0	23.7254		-3.83817	-1.11259	-20.4132	-17.6703	-17.431	-24.9096	-43.6463	-33.3703	-26.2758
0.51629	-61.0117	6.59178	-69.7043	-99.1158	-0.125797	-42.9221	-1.20765	0	24.4424		-3.89247	-1.10672	-20.4753	-17.7586	-17.4311	-24.9478	-43.6473	-33.3703	-26.254
0.51718	-60.9488	6.10117	-69.4024	-97.8578	-0.125797	-42.8592	-1.22023	0	25.1343		-3.94671	-1.10129	-20.537	-17.8456	-17.4312	-24.986	-43.6484	-33.3703	-26.2317
0.51807	-58.3448	5.68604	-69.3647	-97.3923	-0.125797	-43.0479	-1.24539	0	25.8514		-3.99864	-1.09623	-20.5988	-17.9323	-17.4314	-25.0243	-43.6495	-33.3703	-26.2087
0.51896	-48.1552	5.92506	-69.1886	-96.3985	-0.113218	-43.0353	-1.1825	0	26.5936		-4.0415	-1.09096	-20.6603	-18.0181	-17.4315	-25.0626	-43.6506	-33.3703	-26.185
0.51985	-46.6457	5.92506	-69.4779	-95.1028	-0.062899	-43.2114	-0.993799	0	27.2603		-4.08301	-1.08568	-20.7222	-18.1028	-17.4315	-25.101	-43.6515	-33.3703	-26.1607
0.520741	-50.9479	5.8999	-68.4212	-95.3418	0	-41.6389	-0.880582	0	27.688		-4.12836	-1.08043	-20.7831	-18.1876	-17.4315	-25.1381	-43.6522	-33.3703	-26.1361
0.521631	-50.4825	5.81184	-68.4464	-94.6374	0	-41.1986	-0.717045	0	28.1409		-4.17329	-1.07526	-20.844	-18.2718	-17.4315	-25.1748	-43.6529	-33.3703	-26.111
0.522521	-53.0236	5.42187	-68.0564	-93.5304	0	-40.5445	-0.540929	0	28.8831		-4.22048	-1.07044	-20.9046	-18.3551	-17.4315	-25.2108	-43.6534	-33.3703	-26.0853
0.523411	-59.3764	4.56644	-68.4086	-91.7566	0	-40.1671	-0.389972	0	29.4995		-4.27332	-1.06637	-20.9654	-18.4367	-17.4315	-25.2466	-43.6537	-33.3703	-26.0591
0.524301	-63.729	4.02552	-67.528	-88.9136	0	-39.7897	-0.339653	0	30.1914		-4.33004	-1.06279	-21.0255	-18.5159	-17.4315	-25.282	-43.654	-33.3703	-26.0322
0.525191	-88.1966	3.37137	-66.8236	-88.8507	0	-39.991	-0.213856	0	30.7449		-4.40854	-1.05979	-21.085	-18.595	-17.4315	-25.3176	-43.6542	-33.3703	-26.0049
0.526082	-123.609	2.69206	-65.3769	-88.3852	0	-40.2803	-0.125797	0	31.4242		-4.51855	-1.05739	-21.1432	-18.6736	-17.4315	-25.3534	-43.6543	-33.3703	-25.9769
0.526972	-160.065	1.68569	-64.4963	-87.945	0	-40.6326	-0.075478	0	31.8771		-4.661	-1.05589	-21.2006	-18.7519	-17.4315	-25.3896	-43.6544	-33.3703	-25.9485
0.527862	-195.2	0.50319	-62.7226	-87.1147	0	-40.8464	-0.037739	0	32.418		-4.83473	-1.05544	-21.2564	-18.8294	-17.4315	-25.426	-43.6544	-33.3703	-25.9197
0.528752	-225.353	-0.427711	-61.7288	-86.0957	0	-40.9345	-0.01258	0	32.8457		-5.0353	-1.05582	-21.3114	-18.906	-17.4315	-25.4624	-43.6544	-33.3703	-25.8904
0.529642	-234.26	-1.19508	-61.4269	-83.3534	0	-41.0225	0	0	33.3237		-5.24379	-1.05689	-21.366	-18.9802	-17.4315	-25.4989	-43.6544	-33.3703	-25.8608
0.530532	-233.165	-1.83664	-61.7665	-81.2148	0	-41.2615	-0.037739	0	33.764		-5.45131	-1.05852	-21.421	-19.0525	-17.4315	-25.5356	-43.6545	-33.3703	-25.8307
0.531422	-232.159	-2.01276	-61.2508	-80.07	0	-41.3999	-0.113218	0	34.003		-5.65793	-1.06031	-21.4755	-19.1238	-17.4315	-25.5725	-43.6546	-33.3703	-25.8005
0.532313	-229.605	-2.26435	-61.3011	-80.1707	0	-41.4125	-0.113218	0	34.5188		-5.86228	-1.06233	-21.5301	-19.1951	-17.4315	-25.6093	-43.6547	-33.3703	-25.7697
0.533203	-229.442	-2.76754	-61.3514	-80.3468	0	-41.5257	-0.113218	0	34.871		-6.06648	-1.06479	-21.5847	-19.2666	-17.4315	-25.6463	-43.6548	-33.3703	-25.7387
0.534093	-226.649	-3.27073	-60.7476	-79.8184	0	-41.1609	-0.113218	0	35.1352		-6.2682	-1.0677	-21.6387	-19.3377	-17.4315	-25.6829	-43.6549	-33.3703	-25.7074
0.534983	-224.259	-3.27073	-59.5399	-80.0071	0	-40.5445	-0.075478	0	35.5503		-6.46779	-1.07061	-21.6917	-19.4089	-17.4315	-25.719	-43.6549	-33.3703	-25.6758
0.535873	-216.271	-3.01914	-58.5713	-79.2901	0	-40.1797	0	0	35.9655		-6.66027	-1.0733	-21.7439	-19.4795	-17.4315	-25.7548	-43.6549	-33.3703	-25.6438
0.536763	-210.66	-2.45305	-58.0178	-78.5856	0	-39.6136	0	0	36.0661		-6.84776	-1.07548	-21.7955	-19.5494	-17.4315	-25.79	-43.6549	-33.3703	-25.6117
0.537654	-202.232	-0.96864	-57.5397	-77.7554	0	-38.9972	0	0	36.4309		-7.02774	-1.07635	-21.8467	-19.6186	-17.4315	-25.8247	-43.6549	-33.3703	-25.5793
0.538544	-196.118	1.14476	-57.1623	-77.378	0	-38.494	0	0	36.6322		-7.20229	-1.07533	-21.8976	-19.6875	-17.4315	-25.859	-43.6549	-33.3703	-25.5467
0.539434	-184.218	2.64174	-56.8227	-76.6106	0	-38.4185	-0.037739	0	36.7328		-7.36624	-1.07298	-21.9482	-19.7556	-17.4315	-25.8932	-43.655	-33.3703	-25.514
0.540324	-176.846	3.35879	-57.1749	-75.9942	0	-38.1544	-0.100638	0	37.0473		-7.52363	-1.06999	-21.999	-19.8233	-17.4315	-25.9271	-43.6551	-33.3703	-25.481
0.541214	-173.059	3.62297	-58.0052	-75.2268	-0.01258	-38.0789	-0.100638	0	37.0851		-7.67766	-1.06676	-22.0507	-19.8902	-17.4315	-25.961	-43.6551	-33.3703	-25.448
0.542104	-170.682	2.89334	-58.219	-74.9249	-0.01258	-37.7644	-0.100638	0	37.0851		-7.82956	-1.06419	-22.1025	-19.9569	-17.4315	-25.9946	-43.6552	-33.3703	-25.415
0.542994	-168.946	1.50957	-58.1813	-74.5098	-0.01258	-37.7518	-0.100638	0	37.4247		-7.97993	-1.06284	-22.1543	-20.0232	-17.4315	-26.0282	-43.6553	-33.3703	-25.3817
0.543885	-168.506	0.49061	-58.0807	-74.4469	-0.01258	-37.5002	-0.075478	0	37.7141		-8.1299	-1.06241	-22.2059	-20.0895	-17.4316	-26.0616	-43.6554	-33.3703	-25.3481
0.544775	-167.814	0.050319	-57.1875	-74.1072	-0.01258	-37.5631	-0.01258	0	37.6763		-8.27925	-1.06236	-22.2568	-20.1554	-17.4316	-26.095	-43.6554	-33.3703	-25.3146
0.545665	-162.694	-0.075478	-55.9295	-73.7928	0	-37.8147	-0.01258	0	38.0663		-8.42405	-1.06243	-22.3066	-20.2211	-17.4316	-26.1287	-43.6554	-33.3703	-25.2807
0.546555	-158.241	-0.276754	-55.0238	-73.2518	0	-38.0537	-0.01258	0	38.2298		-8.56488	-1.06268	-22.3556	-20.2863	-17.4316	-26.1626	-43.6554	-33.3703	-25.2467
0.547445	-156.769	-0.515769	-54.5709	-73.3902	0	-38.3556	-0.01258	0	38.2676		-8.70441	-1.06314	-22.4042	-20.3516	-17.4316	-26.1967	-43.6554	-33.3703	-25.2126
0.548335	-154.53	-0.893162	-54.4325	-72.8996	0	-38.494	0	0	38.3179		-8.84194	-1.06393	-22.4526	-20.4165	-17.4316	-26.231	-43.6554	-33.3703	-25.1785
0.549226	-150.064	-1.42151	-55.5144	-72.5474	0	-38.4185	0	0	38.4437		-8.97549	-1.0652	-22.502	-20.4811	-17.4316	-26.2651	-43.6554	-33.3703	-25.1443
0.550116	-144.378	-1.62279	-56.2063	-72.5474	0	-38.1921	0	0	38.343		-9.10399	-1.06664	-22.552	-20.5456	-17.4316	-26.2991	-43.6554	-33.3703	-25.1102
0.551006	-139.295	-0.691886	-57.6781	-72.2454	0	-38.0663	0	0	38.645		-9.22796	-1.06726	-22.6034	-20.6099	-17.4316	-26.333	-43.6554	-33.3703	-25.0758
0.551896	-130.515	1.45925	-58.0429	-71.4152	0	-37.9657	0	0	38.8714		-9.34412	-1.06596	-22.655	-20.6735	-17.4316	-26.3668	-43.6554	-33.3703	-25.0412
0.552786	-130.314	5.17027	-58.6467	-70.6101	0	-38.2047	0	0	39.1482		-9.4601	-1.06136	-22.7072	-20.7363	-17.4316	-26.4008	-43.6554	-33.3703	-25.0063
0.553676	-128.477	9.08257	-59.3764	-69.8679	0	-38.3808	0	0	39.3117		-9.57444	-1.05327	-22.7601	-20.7985	-17.4316	-26.435	-43.6554	-33.3703	-24.9714
0.554566	-129.81	13.7119	-59.8418	-68.5596	0	-38.5317	0	-0.037739	39.5633		-9.68998	-1.04107	-22.8133	-20.8595	-17.4316	-26.4693	-43.6554	-33.3703	-24.9361
0.555457	-129.295	18.5677	-58.5838	-68.0941	0	-38.6701	0	-0.037739	39.6765		-9.80505	-1.02454	-22.8655	-20.9201	-17.4316	-26.5037	-43.6554	-33.3704	-24.9008
0.556347	-123.973	23.1845	-58.4706	-67.6664	0	-38.6953	0	-0.037739	39.8275		-9.91538	-1.00391	-22.9175	-20.9804	-17.4316	-26.5381	-43.6554	-33.3704	-24.8654
0.557237	-122.262	27.3987	-58.0681	-67.6538	0	-38.6575	0	-0.037739	39.8023		-10.0242	-0.979524	-22.9692	-21.0406	-17.4316	-26.5725	-43.6554	-33.3704	-24.83
0.558127	-119.457	32.5438	-56.9359	-67.5784	0	-38.6827	0	-0.037739	40.0036		-10.1305	-0.95056	-23.0199	-21.1007	-17.4316	-26.6069	-43.6554	-33.3705	-24.7944
0.559017	-118.627	37.3241	-55.9547	-67.8425	0	-38.733	0	0	40.1797		-10.2361	-0.917342	-23.0697	-21.1611	-17.4316	-26.6414	-43.6554	-33.3705	-24.7586
0.559907	-114.929	40.6703	-56.1811	-67.7796	0	-38.7079	0	0	40.2929		-10.3384	-0.881145	-23.1197	-21.2214	-17.4316	-26.6759	-43.6554	-33.3705	-24.7227
0.560798	-115.318	41.878	-56.0302	-67.3268	0	-38.5443	0	0	40.381		-10.441	-0.843874	-23.1695	-21.2814	-17.4316	-26.7102	-43.6554	-33.3705	-24.6868
0.561688	-109.544	42.1547	-55.5899	-67.289	0	-38.3934	0	0	40.5445		-10.5385	-0.806356	-23.219	-21.3412	-17.4316	-26.7443	-43.6554	-33.3705	-24.6507
0.562578	-109.255	40.7835	-55.6402	-67.201	0	-38.255	0	0	40.859		-10.6357	-0.770059	-23.2685	-21.401	-17.4316	-26.7784	-43.6554	-33.3705	-24.6143
0.563468	-111.016	38.8085	-56.1182	-66.6475	0	-37.9279	0	0	41.6515		-10.7345	-0.735519	-23.3185	-21.4604	-17.4316	-26.8121	-43.6554	-33.3705	-24.5773
0.564358	-112.224	37.1857	-55.7786	-66.2575	0	-37.5757	0	0	42.8214		-10.8344	-0.702424	-23.3681	-21.5193	-17.4316	-26.8456	-43.6554	-33.3705	-24.5392
0.565248	-109.57	37.2612	-55.3131	-66.3833	0	-37.2989	0	0	44.6078		-10.9319	-0.669261	-23.4173	-21.5784	-17.4316	-26.8788	-43.6554	-33.3705	-24.4995
0.566139	-109.092	37.475	-55.0741	-65.8549	0	-36.8209	0	0	46.4444		-11.029	-0.635909	-23.4664	-21.637	-17.4316	-26.9116	-43.6554	-33.3705	-24.4581
0.567029	-111.306	37.5505	-53.7784	-65.3895	0	-36.368	0	0	47.9917		-11.1281	-0.602489	-23.5142	-21.6952	-17.4316	-26.9439	-43.6554	-33.3705	-24.4154
0.567919	-106.148	36.3429	-52.8223	-64.9618	0	-36.28	0	0	48.6459		-11.2226	-0.570143	-23.5612	-21.753	-17.4316	-26.9762	-43.6554	-33.3705	-24.3721
0.568809	-103.934	35.6636	-52.1556	-64.2322	0	-36.6574	0	0	47.6646		-11.3151	-0.538403	-23.6077	-21.8102	-17.4316	-27.0088	-43.6554	-33.3705	-24.3297
0.569699	-103.896	34.3678	-51.9166	-63.1	0	-36.6196	0	0	44.2429		-11.4075	-0.507816	-23.6539	-21.8664	-17.4316	-27.0414	-43.6554	-33.3705	-24.2903
0.570589	-103.418	33.0973	-51.8285	-62.3955	0	-36.8712	0	0	37.7644		-11.4996	-0.478359	-23.7	-21.9219	-17.4316	-27.0742	-43.6554	-33.3705	-24.2567
0.571479	-100.688	32.2922	-52.294	-61.842	0	-36.7706	0	0	27.9396		-11.5892	-0.449619	-23.7465	-21.9769	-17.4316	-27.107	-43.6554	-33.3705	-24.2318
0.57237	-100.273	32.1161	-51.753	-61.5149	0	-36.6699	-0.025159	0	15.9511		-11.6784	-0.421036	-23.7926	-22.0317	-17.4316	-27.1396	-43.6555	-33.3705	-24.2177
0.57326	-105.921	31.1978	-51.8663	-61.0117	0	-36.4687	-0.050319	0	2.75496		-11.7727	-0.39327	-23.8387	-22.086	-17.4316	-27.1721	-43.6555	-33.3705	-24.2152
0.57415	-106.89	30.2291	-51.6902	-60.9992	0	-36.9341	-0.075478	0	-11.4853		-11.8678	-0.366366	-23.8848	-22.1403	-17.4316	-27.2049	-43.6556	-33.3705	-24.2254
0.57504	-107.343	28.8831	-52.4701	-60.7727	0	-36.7077	-0.100638	0	-25.3859		-11.9634	-0.34066	-23.9314	-22.1944	-17.4316	-27.2376	-43.6557	-33.3705	-24.248
0.57593	-103.141	26.5558	-53.2249	-60.7476	0	-36.7328	-0.100638	0	-38.4059		-12.0552	-0.317025	-23.9788	-22.2484	-17.4316	-27.2703	-43.6557	-33.3705	-24.2822
0.57682	-101.305	25.6501	-54.3319	-60.5463	0	-36.6322	-0.075478	0	-51.1115		-12.1453	-0.294196	-24.0272	-22.3023	-17.4316	-27.3029	-43.6558	-33.3705	-24.3277
0.577711	-94.7758	24.933	-55.7031	-60.6595	0	-36.2674	-0.062899	0	-64.3076		-12.2297	-0.272006	-24.0768	-22.3563	-17.4316	-27.3352	-43.6559	-33.3705	-24.3849
0.578601	-95.4551	24.1908	-56.244	-60.7098	0	-35.9529	-0.062899	0	-77.1138		-12.3146	-0.250476	-24.1268	-22.4103	-17.4316	-27.3672	-43.6559	-33.3705	-24.4536
0.579491	-92.1718	23.5115	-55.8163	-60.5463	0	-36.041	-0.050319	0	-89.3287		-12.3967	-0.229551	-24.1765	-22.4642	-17.4316	-27.3993	-43.656	-33.3705	-24.5331
0.580381	-90.8006	24.1531	-54.9357	-60.4331	0	-36.2674	-0.050319	0	-100.864		-12.4775	-0.208055	-24.2254	-22.518	-17.4316	-27.4315	-43.656	-33.3705	-24.6228
0.581271	-86.7625	23.5619	-53.552	-60.3828	0	-36.4687	-0.050319	0	-112.689		-12.5547	-0.187085	-24.273	-22.5717	-17.4316	-27.464	-43.6561	-33.3705	-24.7231
0.582161	-84.8755	22.719	-51.665	-59.9299	0	-36.758	-0.037739	0	-123.747		-12.6302	-0.166865	-24.319	-22.6251	-17.4316	-27.4967	-43.6561	-33.3705	-24.8333
0.583051	-81.24	22.2284	-50.6964	-59.3764	0	-36.5316	-0.025159	0	-134.918		-12.7025	-0.147081	-24.3641	-22.6779	-17.4316	-27.5292	-43.6561	-33.3705	-24.9533
0.583942	-82.0325	21.5617	-49.8409	-58.8732	0	-36.28	-0.01258	0	-146.705		-12.7756	-0.127892	-24.4085	-22.7303	-17.4316	-27.5615	-43.6561	-33.3705	-25.0839
0.584832	-80.2713	20.8824	-49.5139	-58.3071	0	-36.0535	-0.025159	0	-160.027		-12.847	-0.109306	-24.4526	-22.7822	-17.4316	-27.5936	-43.6561	-33.3705	-25.2263
0.585722	-80.9003	20.4798	-49.7655	-57.6781	0	-35.651	-0.025159	0	-170.82		-12.919	-0.0910792	-24.4969	-22.8336	-17.4316	-27.6253	-43.6562	-33.3705	-25.3783
0.586612	-81.24	20.0395	-49.7403	-57.4391	0	-35.2359	-0.025159	0	-180.595		-12.9913	-0.073244	-24.5411	-22.8847	-17.4316	-27.6567	-43.6562	-33.3705	-25.5391
0.587502	-82.5986	19.5867	-50.1303	-57.1246	0	-35.2359	-0.01258	0	-191.69		-13.0648	-0.0558119	-24.5857	-22.9355	-17.4316	-27.688	-43.6562	-33.3705	-25.7097
0.588392	-80.4726	19.1715	-50.2309	-56.873	0	-35.2233	-0.01258	0	-203.024		-13.1364	-0.0387493	-24.6304	-22.9861	-17.4316	-27.7194	-43.6562	-33.3705	-25.8904
0.589283	-81.3029	18.6432	-50.2686	-56.5333	0	-35.1352	0	0	-212.208		-13.2088	-0.0221568	-24.6752	-23.0364	-17.4316	-27.7507	-43.6562	-33.3705	-26.0792
0.590173	-81.2274	18.2658	-49.8787	-56.0931	0	-35.0849	0	0	-220.158		-13.2811	-0.00590028	-24.7196	-23.0864	-17.4316	-27.7819	-43.6562	-33.3705	-26.2752
0.591063	-79.9442	18.0393	-50.0548	-55.5647	0	-34.9968	0	0	-228.838		-13.3522	0.0101547	-24.7641	-23.1358	-17.4316	-27.813	-43.6562	-33.3705	-26.4788
0.591953	-78.1705	17.5487	-49.7277	-55.4012	0	-34.8459	0	0	-235.669		-13.4218	0.0257731	-24.8084	-23.1851	-17.4316	-27.844	-43.6562	-33.3705	-26.6886
0.592843	-77.9692	17.1713	-49.6271	-55.4389	0	-34.7704	0	0	-240.55		-13.4912	0.0410556	-24.8526	-23.2345	-17.4316	-27.875	-43.6562	-33.3705	-26.9027
0.593733	-76.8874	16.7814	-49.8283	-55.2376	0	-34.9088	0	0	-247.431		-13.5596	0.055991	-24.8969	-23.2836	-17.4316	-27.9061	-43.6562	-33.3705	-27.1229
0.594623	-76.837	16.2656	-49.6397	-55.2754	0	-35.0597	0	0	-254.614		-13.628	0.0704674	-24.9411	-23.3328	-17.4316	-27.9373	-43.6562	-33.3705	-27.3495
0.595514	-76.4974	15.6869	-50.4699	-55.6276	0	-35.0597	-0.01258	0	-268.175		-13.6961	0.0844288	-24.986	-23.3823	-17.4316	-27.9685	-43.6562	-33.3705	-27.5882
0.596404	-75.8181	15.0957	-51.187	-55.5521	0	-35.0849	-0.01258	0	-285.032		-13.7636	0.097864	-25.0316	-23.4318	-17.4316	-27.9997	-43.6562	-33.3705	-27.8419
0.597294	-74.2205	14.4415	-50.9228	-55.2376	0	-35.2359	-0.01258	0	-302.241		-13.8296	0.110717	-25.0769	-23.4809	-17.4316	-28.0311	-43.6562	-33.3705	-28.1108
0.598184	-74.4217	13.7622	-52.3569	-54.986	0	-34.9717	-0.01258	0	-321.073		-13.8959	0.122965	-25.1235	-23.5299	-17.4316	-28.0622	-43.6563	-33.3705	-28.3966
0.599074	-73.3902	13.1207	-53.011	-54.7973	0	-34.6069	-0.01258	0	-346.484		-13.9612	0.134643	-25.1707	-23.5786	-17.4316	-28.093	-43.6563	-33.3705	-28.705
0.599964	-72.0442	12.4414	-51.5895	-54.3948	0	-34.5314	0	0	-362.611		-14.0253	0.145716	-25.2166	-23.6271	-17.4316	-28.1237	-43.6563	-33.3705	-29.0277
0.600855	-70.9497	11.8124	-50.4196	-54.2313	0	-34.4936	0	0	-380.084		-14.0884	0.156229	-25.2614	-23.6753	-17.4316	-28.1544	-43.6563	-33.3705	-29.366
0.601745	-70.5598	11.0828	-50.2057	-54.6464	0	-34.4182	0	0	-398.627		-14.1512	0.166092	-25.3061	-23.724	-17.4316	-28.185	-43.6563	-33.3705	-29.7208
0.602635	-69.415	10.7179	-47.9917	-54.659	0	-34.5943	0	0	-412.578		-14.213	0.175631	-25.3488	-23.7726	-17.4316	-28.2158	-43.6563	-33.3705	-30.0879
0.603525	-68.7483	10.3783	-47.2998	-54.5458	0	-35.0346	0	0	-420.843		-14.2742	0.184868	-25.3909	-23.8211	-17.4316	-28.247	-43.6563	-33.3705	-30.4625
0.604415	-68.1067	10.0638	-47.5388	-54.4577	0	-35.2987	0	0	-420.717		-14.3348	0.193825	-25.4332	-23.8696	-17.4316	-28.2784	-43.6563	-33.3705	-30.8369
0.605305	-67.7042	9.06999	-48.0294	-54.1432	0	-35.1101	0	0	-416.591		-14.3951	0.201897	-25.476	-23.9178	-17.4316	-28.3097	-43.6563	-33.3705	-31.2077
0.606195	-67.8048	8.00071	-48.2433	-53.5645	0	-34.7704	0	0	-412.376		-14.4554	0.209018	-25.5189	-23.9655	-17.4316	-28.3406	-43.6563	-33.3705	-31.5747
0.607086	-66.6097	7.71138	-48.1049	-53.552	0	-34.5314	-0.01258	0	-397.885		-14.5147	0.215881	-25.5617	-24.0131	-17.4316	-28.3714	-43.6563	-33.3705	-31.9288
0.607976	-66.1443	7.47236	-48.0043	-53.4262	0	-34.5062	-0.01258	0	-387.217		-14.5736	0.222531	-25.6045	-24.0607	-17.4316	-28.4021	-43.6563	-33.3705	-32.2735
0.608866	-66.3707	7.45979	-47.715	-53.1242	0	-34.4307	-0.01258	0	-379.355		-14.6326	0.22917	-25.6469	-24.108	-17.4316	-28.4327	-43.6563	-33.3705	-32.6111
0.609756	-66.8236	8.03845	-47.5263	-53.011	0	-34.6194	-0.01258	1.34603	-369.052		-14.6921	0.236324	-25.6892	-24.1551	-17.4316	-28.4635	-43.6563	-33.3693	-32.9395
0.610646	-66.9871	8.85614	-47.4508	-52.8475	0	-34.9465	-0.01258	3.58523	-349.075		-14.7517	0.244206	-25.7315	-24.2022	-17.4316	-28.4946	-43.6563	-33.3661	-33.2502
0.611536	-67.6538	8.61712	-47.3501	-52.3191	0	-34.9717	0	5.93764	-338.018		-14.812	0.251876	-25.7736	-24.2487	-17.4316	-28.5257	-43.6563	-33.3608	-33.551
0.612427	-67.4022	8.34037	-47.2369	-51.7027	0	-34.7201	0	8.31521	-316.204		-14.8719	0.259299	-25.8156	-24.2948	-17.4316	-28.5566	-43.6563	-33.3534	-33.8325
0.613317	-67.44	7.66106	-47.4759	-51.4889	0	-34.4936	0	10.7054	-298.844		-14.932	0.266117	-25.8579	-24.3406	-17.4316	-28.5873	-43.6563	-33.3439	-34.0984
0.614207	-67.1758	7.08239	-47.3753	-51.426	0	-34.3175	-0.01258	11.7872	-283.761		-14.9917	0.27242	-25.9001	-24.3864	-17.4316	-28.6179	-43.6563	-33.3334	-34.351
0.615097	-66.1317	6.51631	-47.2118	-51.1744	0	-34.0534	-0.025159	12.0011	-273.672		-15.0506	0.27822	-25.9421	-24.4319	-17.4316	-28.6482	-43.6564	-33.3227	-34.5946
0.615987	-66.6349	5.92506	-47.1237	-51.9669	0	-33.9527	-0.037739	12.5294	-262.023		-15.1099	0.283493	-25.984	-24.4781	-17.4316	-28.6784	-43.6564	-33.3116	-34.8278
0.616877	-65.9682	5.11995	-47.0105	-52.6462	0	-33.9905	-0.050319	13.0326	-256.778		-15.1686	0.28805	-26.0259	-24.525	-17.4316	-28.7087	-43.6564	-33.3	-35.0563
0.617767	-66.8991	4.30227	-46.4318	-53.1871	0	-33.9527	-0.050319	13.5484	-251.519		-15.2282	0.291879	-26.0672	-24.5723	-17.4316	-28.7389	-43.6565	-33.2879	-35.2801
0.618658	-68.8489	3.39653	-45.9286	-53.0236	0	-33.8647	-0.037739	13.9887	-240.374		-15.2894	0.294902	-26.1081	-24.6195	-17.4316	-28.769	-43.6565	-33.2754	-35.4941
0.619548	-70.5849	2.78012	-45.438	-52.9607	0	-33.8143	-0.025159	14.3409	-234.323		-15.3523	0.297376	-26.1485	-24.6667	-17.4316	-28.7991	-43.6565	-33.2627	-35.7026
0.620438	-69.7672	1.67311	-45.1109	-52.0046	0	-33.9401	-0.01258	14.1145	-227.882		-15.4144	0.298865	-26.1886	-24.713	-17.4316	-28.8293	-43.6566	-33.2501	-35.9054
0.621328	-69.415	0.729625	-44.809	-51.3757	0	-33.8521	0	13.8126	-221.605		-15.4761	0.299515	-26.2285	-24.7587	-17.4316	-28.8595	-43.6566	-33.2378	-36.1027
0.622218	-68.2577	0.50319	-44.6203	-50.8976	0	-33.8647	0	13.5232	-216.787		-15.5369	0.299962	-26.2682	-24.804	-17.4316	-28.8896	-43.6566	-33.2258	-36.2956
0.623108	-65.3266	0.389972	-44.1926	-50.7718	0	-33.9401	0	13.1584	-214.988		-15.595	0.300309	-26.3076	-24.8492	-17.4316	-28.9198	-43.6566	-33.2141	-36.4869
0.623999	-63.8296	-0.226435	-44.1549	-50.6964	0	-34.0408	0	12.781	-209.289		-15.6518	0.300108	-26.3469	-24.8943	-17.4316	-28.9501	-43.6566	-33.2027	-36.6732
0.624889	-63.6535	-0.301914	-44.0039	-50.9102	0	-34.0659	0	12.4791	-205.578		-15.7085	0.299839	-26.386	-24.9396	-17.4316	-28.9804	-43.6566	-33.1916	-36.8562
0.625779	-63.5151	-0.226435	-43.8027	-51.1744	0	-33.9401	0	12.2149	-202.697		-15.765	0.299638	-26.425	-24.9851	-17.4316	-29.0106	-43.6566	-33.1807	-37.0366
0.626669	-63.9051	-0.616407	-44.2052	-50.8725	0	-33.7766	0	11.8501	-199.678		-15.8219	0.299089	-26.4644	-25.0304	-17.4316	-29.0407	-43.6566	-33.1702	-37.2143
0.627559	-64.1567	-1.22023	-44.4065	-50.6586	0	-33.5627	0	11.5985	-196.445		-15.879	0.298003	-26.5039	-25.0755	-17.4316	-29.0706	-43.6566	-33.1599	-37.3891
0.628449	-63.8296	-1.54731	-44.6078	-50.646	0	-33.4747	0	11.4727	-191.803		-15.9358	0.296626	-26.5436	-25.1206	-17.4316	-29.1003	-43.6566	-33.1496	-37.5598
0.62934	-62.8735	-1.87438	-44.8468	-50.5454	0	-33.0721	0	11.4601	-187.212		-15.9918	0.294958	-26.5835	-25.1656	-17.4316	-29.1298	-43.6566	-33.1395	-37.7264
0.63023	-62.2194	-2.21403	-44.7713	-50.407	0	-32.8834	0	11.5105	-182.922		-16.0471	0.292987	-26.6233	-25.2104	-17.4316	-29.159	-43.6566	-33.1292	-37.8893
0.63112	-60.8105	-2.50337	-44.2304	-50.646	0	-32.6067	0	11.6111	-178.406		-16.1012	0.290759	-26.6627	-25.2555	-17.4316	-29.1881	-43.6566	-33.1189	-38.048
0.63201	-59.9425	-2.51595	-43.9159	-50.7844	0	-32.4306	0	11.7495	-172.707		-16.1546	0.28852	-26.7018	-25.3007	-17.4316	-29.2169	-43.6566	-33.1084	-38.2017
0.6329	-58.2819	-2.51595	-43.3372	-50.646	0	-32.0658	0	11.8501	-170.003		-16.2065	0.286281	-26.7404	-25.3458	-17.4316	-29.2455	-43.6566	-33.0979	-38.353
0.63379	-57.5523	-2.51595	-42.8592	-50.1932	0	-32.0154	0	11.7998	-167.726		-16.2577	0.284042	-26.7785	-25.3904	-17.4316	-29.274	-43.6566	-33.0874	-38.5023
0.63468	-56.9359	-2.26435	-42.4315	-49.7655	0	-32.0658	0	11.7117	-163.36		-16.3084	0.282026	-26.8163	-25.4347	-17.4316	-29.3025	-43.6566	-33.0769	-38.6477
0.635571	-56.1811	-2.01276	-42.0415	-49.5264	0	-32.2545	0	11.7243	-160.958		-16.3584	0.280235	-26.8537	-25.4788	-17.4316	-29.3312	-43.6566	-33.0665	-38.791
0.636461	-56.4327	-1.76116	-42.1421	-49.2245	0	-32.3174	0	11.6488	-159.675		-16.4086	0.278668	-26.8912	-25.5226	-17.4316	-29.36	-43.6566	-33.0561	-38.9331
0.637351	-57.0491	-1.50957	-41.9157	-49.0358	0	-32.4935	0	11.5608	-156.97		-16.4594	0.277324	-26.9285	-25.5663	-17.4316	-29.3889	-43.6566	-33.0459	-39.0728
0.638241	-56.7472	-1.25797	-41.7144	-48.9981	0	-32.4054	0	11.5985	-154.945		-16.5099	0.276205	-26.9656	-25.6099	-17.4316	-29.4177	-43.6566	-33.0355	-39.2107
0.639131	-56.8982	-1.25797	-42.0037	-48.7968	0	-32.267	0	11.6363	-153.385		-16.5605	0.275085	-27.003	-25.6533	-17.4316	-29.4464	-43.6566	-33.0252	-39.3472
0.640021	-57.2127	-1.25797	-42.595	-49.0861	0	-32.2041	0	11.5859	-150.856		-16.6114	0.273965	-27.0409	-25.697	-17.4316	-29.4751	-43.6566	-33.0149	-39.4815
0.640912	-56.9107	-1.25797	-42.6076	-49.2874	0	-32.0783	0	11.5105	-146.051		-16.6621	0.272846	-27.0788	-25.7409	-17.4316	-29.5037	-43.6566	-33.0046	-39.6114
0.641802	-56.4705	-1.25797	-42.7585	-49.6774	0	-31.8896	0	11.3092	-143.233		-16.7123	0.271726	-27.1169	-25.7851	-17.4316	-29.532	-43.6566	-32.9946	-39.7389
0.642692	-56.9736	-1.49699	-43.0982	-50.0296	0	-32.0532	0	11.0702	-139.887		-16.763	0.270394	-27.1552	-25.8296	-17.4316	-29.5606	-43.6566	-32.9847	-39.8634
0.643582	-56.5837	-1.736	-42.8843	-50.4322	0	-32.179	0	10.8815	-137.232		-16.8134	0.268849	-27.1934	-25.8745	-17.4316	-29.5892	-43.6566	-32.975	-39.9855
0.644472	-55.6779	-1.9876	-42.4692	-49.5516	0	-32.7325	0	10.6173	-134.062		-16.863	0.26708	-27.2312	-25.9186	-17.4316	-29.6183	-43.6566	-32.9656	-40.1049
0.645362	-55.1999	-2.23919	-42.5321	-49.1616	0	-32.9086	0	10.2525	-132.842		-16.9121	0.265087	-27.2691	-25.9623	-17.4316	-29.6476	-43.6566	-32.9564	-40.2231
0.646252	-54.6464	-2.49079	-42.4063	-48.4697	0	-33.2608	0	9.32159	-130.766		-16.9607	0.26287	-27.3068	-26.0055	-17.4316	-29.6772	-43.6566	-32.9481	-40.3395
0.647143	-54.7344	-2.50337	-41.8276	-47.6898	0	-33.3111	0	8.03845	-128.225		-17.0094	0.260642	-27.344	-26.0479	-17.4316	-29.7069	-43.6566	-32.941	-40.4536
0.648033	-54.7219	-2.51595	-41.9534	-47.0985	0	-33.2357	0	6.54146	-125.106		-17.0581	0.258403	-27.3814	-26.0898	-17.4316	-29.7365	-43.6566	-32.9352	-40.5649
0.648923	-55.7786	-2.51595	-41.8402	-47.0231	0	-32.6444	0	4.91868	-121.923		-17.1078	0.256164	-27.4186	-26.1317	-17.4316	-29.7655	-43.6566	-32.9308	-40.6735
0.649813	-56.2692	-2.26435	-41.3748	-46.8344	0	-32.5815	0	3.35879	-118.602		-17.1579	0.254148	-27.4554	-26.1734	-17.4316	-29.7945	-43.6566	-32.9278	-40.779
0.650703	-56.4579	-2.01276	-41.1609	-46.3815	0	-32.2922	0	2.31467	-114.689		-17.2081	0.252357	-27.4921	-26.2146	-17.4316	-29.8232	-43.6566	-32.9257	-40.8811
0.651593	-56.0931	-1.76116	-41.1106	-46.3312	0	-32.0029	0	1.52215	-111.041		-17.258	0.25079	-27.5287	-26.2559	-17.4316	-29.8517	-43.6566	-32.9244	-40.9799
0.652484	-56.0553	-1.50957	-41.1357	-46.2305	0	-32.0154	0	0.94348	-107.871		-17.3079	0.249446	-27.5653	-26.297	-17.4316	-29.8802	-43.6566	-32.9235	-41.0759
0.653374	-55.8037	-1.25797	-41.2112	-46.2557	0	-32.028	0	0.641567	-104.349		-17.3576	0.248327	-27.6019	-26.3382	-17.4316	-29.9087	-43.6566	-32.923	-41.1688
0.654264	-55.1873	-1.25797	-41.2615	-46.1173	0	-31.9903	0	0.415131	-101.984		-17.4067	0.247207	-27.6387	-26.3792	-17.4316	-29.9372	-43.6566	-32.9226	-41.2596
0.655154	-54.6464	-1.25797	-40.9848	-46.1928	0	-31.9651	0	0.301914	-99.3422		-17.4553	0.246087	-27.6751	-26.4203	-17.4316	-29.9657	-43.6566	-32.9223	-41.348
0.656044	-53.9042	-1.25797	-40.7709	-46.1425	0	-32.0532	0	0.289334	-97.3672		-17.5033	0.244968	-27.7114	-26.4614	-17.4316	-29.9942	-43.6566	-32.9221	-41.4346
0.656934	-53.7658	-1.25797	-40.6829	-45.9035	-0.01258	-31.8771	0	0.239015	-95.0903		-17.5512	0.243848	-27.7476	-26.5023	-17.4316	-30.0225	-43.6566	-32.9219	-41.5193
0.657824	-52.8097	-1.25797	-40.5445	-45.6016	-0.025159	-31.7009	0	0.113218	-93.9455		-17.5982	0.242729	-27.7837	-26.5429	-17.4316	-30.0508	-43.6566	-32.9218	-41.6029
0.658715	-52.6462	-1.25797	-40.7709	-45.2116	-0.037739	-31.5626	0	0.025159	-92.3101		-17.645	0.241609	-27.82	-26.5831	-17.4316	-30.0789	-43.6566	-32.9217	-41.685
0.659605	-52.8978	-1.25797	-40.7835	-45.1109	-0.050319	-31.5877	0	0.603827	-90.9264		-17.6921	0.240489	-27.8563	-26.6232	-17.4317	-30.107	-43.6566	-32.9212	-41.7659
0.660495	-52.9104	-1.00638	-40.8464	-44.9474	-0.050319	-31.6632	0	2.61659	-89.2658		-17.7392	0.239594	-27.8927	-26.6632	-17.4317	-30.1351	-43.6566	-32.9189	-41.8454
0.661385	-52.1053	-0.754784	-40.4439	-44.9851	-0.050319	-31.6884	0	4.89352	-88.272		-17.7856	0.238922	-27.9287	-26.7033	-17.4318	-30.1633	-43.6566	-32.9145	-41.924
0.662275	-52.9607	-0.50319	-40.1419	-45.0229	-0.037739	-31.8016	-0.01258	7.15787	-87.0015		-17.8327	0.238474	-27.9644	-26.7434	-17.4318	-30.1917	-43.6566	-32.9082	-42.0014
0.663165	-53.401	-0.251595	-39.5759	-45.0984	-0.025159	-31.7513	-0.062899	9.52286	-85.7309		-17.8802	0.23825	-27.9996	-26.7835	-17.4318	-30.2199	-43.6566	-32.8997	-42.0777
0.664056	-53.5394	0	-39.6891	-44.7084	-0.01258	-31.6003	-0.113218	13.4352	-84.6365		-17.9279	0.23825	-28.0349	-26.8233	-17.4318	-30.248	-43.6567	-32.8877	-42.153
0.664946	-53.3507	0	-39.5759	-44.3939	-0.01258	-31.5751	-0.150957	18.0771	-83.844		-17.9754	0.23825	-28.0702	-26.8628	-17.4318	-30.2761	-43.6569	-32.8716	-42.2276
0.665836	-53.5645	0	-39.5004	-43.8278	0	-31.7135	-0.150957	24.6185	-82.8376		-18.023	0.23825	-28.1053	-26.9018	-17.4318	-30.3044	-43.657	-32.8497	-42.3014
0.666726	-53.0236	0	-39.5381	-43.5133	0	-31.7513	-0.150957	32.9463	-81.7431		-18.0702	0.23825	-28.1405	-26.9405	-17.4318	-30.3326	-43.6571	-32.8204	-42.3741
0.667616	-52.1053	0	-39.6891	-43.6391	0	-31.8896	-0.100638	42.1295	-81.0764		-18.1166	0.23825	-28.1758	-26.9794	-17.4318	-30.361	-43.6572	-32.7829	-42.4463
0.668506	-51.6021	0	-39.9407	-43.9788	0	-32.028	-0.050319	49.9164	-81.1142		-18.1625	0.23825	-28.2114	-27.0185	-17.4318	-30.3895	-43.6573	-32.7385	-42.5185
0.669396	-52.143	0	-40.1545	-43.8656	0	-31.9274	-0.01258	55.9295	-80.6613		-18.2089	0.23825	-28.2471	-27.0575	-17.4318	-30.4179	-43.6573	-32.6887	-42.5902
0.670287	-51.9795	0	-40.2048	-44.0291	0	-31.789	-0.037739	60.2066	-80.5607		-18.2552	0.23825	-28.2829	-27.0967	-17.4318	-30.4462	-43.6573	-32.6351	-42.6619
0.671177	-51.3253	0	-40.1797	-44.3184	0	-31.6758	-0.050319	62.8484	-80.9884		-18.3009	0.23825	-28.3186	-27.1362	-17.4318	-30.4744	-43.6573	-32.5792	-42.734
0.672067	-50.9605	0	-40.3306	-44.1171	0	-31.4871	-0.050319	64.7982	-81.4916		-18.3462	0.23825	-28.3545	-27.1754	-17.4318	-30.5024	-43.6574	-32.5215	-42.8066
0.672957	-50.8599	0	-40.23	-43.7272	0	-31.2984	-0.113218	65.6537	-81.4287		-18.3915	0.23825	-28.3903	-27.2144	-17.4318	-30.5303	-43.6575	-32.4631	-42.879
0.673847	-50.319	0	-40.3055	-43.7775	0	-31.1097	-0.251595	66.6978	-81.8312		-18.4363	0.23825	-28.4262	-27.2533	-17.4318	-30.558	-43.6577	-32.4037	-42.9519
0.674737	-50.0925	0	-40.4313	-43.9033	0	-30.7826	-0.50319	66.811	-81.6299		-18.4808	0.23825	-28.4622	-27.2924	-17.4318	-30.5854	-43.6582	-32.3443	-43.0245
0.675628	-50.3567	0	-40.3055	-43.9159	0	-30.6065	-1.25797	67.0123	-80.5732		-18.5257	0.23825	-28.4981	-27.3315	-17.4318	-30.6126	-43.6593	-32.2846	-43.0962
0.676518	-49.7655	0	-39.9029	-43.5133	0	-30.3549	-2.47821	66.9368	-79.3907		-18.57	0.23825	-28.5336	-27.3702	-17.4318	-30.6396	-43.6615	-32.225	-43.1669
0.677408	-48.8974	0	-39.6765	-43.5511	0	-30.204	-4.16389	66.7481	-78.6108		-18.6135	0.23825	-28.5689	-27.409	-17.4318	-30.6665	-43.6652	-32.1656	-43.2368
0.678298	-48.1049	0	-39.362	-43.5511	0	-30.1662	-5.98796	66.0562	-77.7679		-18.6563	0.23825	-28.6039	-27.4477	-17.4318	-30.6934	-43.6705	-32.1068	-43.306
0.679188	-47.2495	0	-39.0727	-43.7523	0	-30.6065	-7.72396	65.7669	-77.6422		-18.6983	0.23825	-28.6387	-27.4867	-17.4318	-30.7206	-43.6774	-32.0483	-43.3752
0.680078	-45.8028	0	-39.0727	-43.1359	0	-30.7575	-9.20837	65.0247	-78.0699		-18.7391	0.23825	-28.6735	-27.5251	-17.4318	-30.748	-43.6856	-31.9904	-43.4446
0.680968	-46.2809	0	-38.8462	-43.1485	0	-30.8078	-10.3154	64.3454	-77.8057		-18.7803	0.23825	-28.7081	-27.5635	-17.4318	-30.7754	-43.6948	-31.9332	-43.5139
0.681859	-46.3689	0	-38.7079	-43.0227	0	-30.6191	-10.8437	64.2447	-76.3968		-18.8216	0.23825	-28.7425	-27.6017	-17.4318	-30.8026	-43.7044	-31.876	-43.5819
0.682749	-46.2431	0	-38.5569	-42.7585	0	-30.7071	-11.2085	64.0435	-74.862		-18.8627	0.23825	-28.7768	-27.6398	-17.4318	-30.83	-43.7144	-31.819	-43.6485
0.683639	-46.3186	0	-38.5695	-42.0415	0	-30.4933	-11.5105	63.729	-72.5096		-18.9039	0.23825	-28.8111	-27.6772	-17.4318	-30.8571	-43.7246	-31.7623	-43.713
0.684529	-46.6834	0	-38.0789	-41.9031	0	-30.3801	-11.5356	63.7541	-69.6918		-18.9455	0.23825	-28.845	-27.7145	-17.4318	-30.8841	-43.7349	-31.7055	-43.7751
0.685419	-45.8783	0	-37.9405	-42.3686	0	-30.8329	-11.5859	63.0622	-67.3016		-18.9863	0.23825	-28.8788	-27.7522	-17.4318	-30.9116	-43.7452	-31.6494	-43.835
0.686309	-46.1928	0	-37.3241	-43.0856	0	-31.5751	-11.5859	62.3955	-66.1946		-19.0274	0.23825	-28.912	-27.7906	-17.4318	-30.9397	-43.7555	-31.5939	-43.8939
0.6872	-45.9789	0	-36.7832	-43.2869	0	-31.5751	-11.5734	61.4898	-67.1255		-19.0684	0.23825	-28.9448	-27.8291	-17.4318	-30.9678	-43.7658	-31.5392	-43.9536
0.68809	-46.1551	0	-36.1039	-44.6581	0	-31.311	-11.5859	60.7224	-71.7045		-19.1094	0.23825	-28.9769	-27.8688	-17.4318	-30.9957	-43.7761	-31.4851	-44.0174
0.68898	-45.6267	0	-35.7768	-46.0796	0	-31.0971	-12.2904	59.8041	-81.0764		-19.15	0.23825	-29.0087	-27.9098	-17.4318	-31.0233	-43.7871	-31.4319	-44.0896
0.68987	-45.2619	0	-35.5629	-45.5009	0	-30.6317	-12.6301	59.1625	-96.1973		-19.1903	0.23825	-29.0404	-27.9503	-17.4318	-31.0506	-43.7983	-31.3792	-44.1752
0.69076	-44.3436	0	-35.6258	-44.8594	0	-29.8895	-12.6678	58.0932	-115.746		-19.2298	0.23825	-29.0721	-27.9903	-17.4318	-31.0772	-43.8096	-31.3275	-44.2782
0.69165	-43.9159	0	-35.7265	-44.7587	0	-29.4743	-12.7055	57.3259	-137.258		-19.2689	0.23825	-29.1039	-28.0301	-17.4318	-31.1034	-43.8209	-31.2765	-44.4004
0.692541	-42.7837	0	-35.9529	-43.6894	0	-29.3108	-12.6175	56.3572	-159.146		-19.307	0.23825	-29.1359	-28.069	-17.4318	-31.1295	-43.8321	-31.2264	-44.542
0.693431	-42.1295	0	-36.607	-42.3308	0	-29.4492	-11.6111	55.2502	-181.526		-19.3444	0.23825	-29.1685	-28.1067	-17.4318	-31.1557	-43.8425	-31.1772	-44.7036
0.694321	-42.5698	0	-37.148	-42.2302	0	-29.6127	-10.3531	54.4325	-201.188		-19.3823	0.23825	-29.2015	-28.1442	-17.4318	-31.1821	-43.8517	-31.1287	-44.8826
0.695211	-42.9598	0	-37.3367	-41.966	0	-29.8517	-8.47874	53.5897	-218.422		-19.4206	0.23825	-29.2348	-28.1816	-17.4318	-31.2086	-43.8592	-31.081	-45.077
0.696101	-43.5888	0	-37.6889	-41.878	0	-30.1536	-6.15149	52.5959	-235.845		-19.4594	0.23825	-29.2683	-28.2189	-17.4318	-31.2355	-43.8647	-31.0342	-45.2869
0.696991	-43.9285	0	-37.8776	-41.9409	0	-30.3046	-3.9123	51.9166	-249.708		-19.4985	0.23825	-29.302	-28.2562	-17.4318	-31.2625	-43.8682	-30.988	-45.5092
0.697881	-43.8278	0	-37.7895	-42.1044	0	-30.1159	-1.9247	51.0737	-263.055		-19.5375	0.23825	-29.3356	-28.2937	-17.4318	-31.2893	-43.8699	-30.9426	-45.7433
0.698772	-43.6265	-0.251595	-37.5128	-42.0541	0	-29.8391	-0.46545	50.0674	-281.207		-19.5763	0.238026	-29.369	-28.3311	-17.4318	-31.3158	-43.8703	-30.898	-45.9936
0.699662	-43.3372	-0.50319	-37.8524	-41.9912	0	-30.0278	-0.01258	48.8974	-298.794		-19.6149	0.237578	-29.4027	-28.3685	-17.4318	-31.3425	-43.8703	-30.8545	-46.2595
0.700552	-42.0918	-0.754784	-38.2172	-41.727	0	-29.9524	0.540929	47.6772	-314.883		-19.6523	0.236907	-29.4367	-28.4056	-17.4318	-31.3692	-43.8698	-30.8121	-46.5397
0.701442	-41.5257	-1.00638	-37.9028	-41.2238	0	-29.8895	1.61021	45.9538	-329.111		-19.6893	0.236011	-29.4705	-28.4423	-17.4318	-31.3958	-43.8684	-30.7712	-46.8326
0.702332	-41.576	-1.25797	-37.9531	-40.9219	0	-29.9398	3.05688	44.482	-341.729		-19.7263	0.234891	-29.5042	-28.4787	-17.4318	-31.4224	-43.8657	-30.7316	-47.1368
0.703222	-41.0603	-1.25797	-38.0034	-40.9722	0	-29.8014	4.76772	42.8969	-345.93		-19.7628	0.233772	-29.5381	-28.5152	-17.4318	-31.449	-43.8614	-30.6934	-47.4447
0.704113	-40.4439	-1.25797	-37.8902	-41.2364	0	-28.9334	6.47857	41.6138	-352.396		-19.7988	0.232652	-29.5718	-28.5519	-17.4318	-31.4747	-43.8557	-30.6564	-47.7583
0.705003	-40.6577	-1.25797	-37.148	-41.1357	0	-28.5057	7.71138	40.23	-359.491		-19.835	0.231533	-29.6048	-28.5885	-17.4318	-31.5001	-43.8488	-30.6205	-48.0782
0.705893	-40.8716	-1.25797	-37.2486	-41.4251	0	-28.3547	8.12651	38.884	-367.366		-19.8714	0.230413	-29.638	-28.6254	-17.4318	-31.5253	-43.8416	-30.5859	-48.4052
0.706783	-41.8402	-1.25797	-37.148	-41.3999	0	-28.1283	8.08877	37.6637	-376.335		-19.9086	0.229293	-29.6711	-28.6622	-17.4318	-31.5504	-43.8344	-30.5524	-48.7401
0.707673	-42.6453	-1.25797	-37.0851	-41.3119	0	-28.1409	6.5792	36.607	-391.066		-19.9466	0.228174	-29.7041	-28.699	-17.4318	-31.5754	-43.8285	-30.5198	-49.0882
0.708563	-43.3246	-1.25797	-36.997	-40.8338	0	-28.5057	4.31485	35.412	-403.986		-19.9851	0.227054	-29.737	-28.7353	-17.4318	-31.6008	-43.8247	-30.4883	-49.4477
0.709453	-43.5385	-1.25797	-36.8838	-40.4313	0	-28.5183	2.32725	34.4056	-416.314		-20.0239	0.225935	-29.7698	-28.7713	-17.4318	-31.6262	-43.8226	-30.4577	-49.8183
0.710344	-43.9662	-1.25797	-36.8083	-39.8275	0	-28.3422	0.98122	33.5376	-421.396		-20.063	0.224815	-29.8026	-28.8067	-17.4318	-31.6514	-43.8217	-30.4279	-50.1933
0.711234	-43.4756	-1.25797	-36.4561	-39.513	0	-28.1912	-0.389972	32.3174	-422.151		-20.1017	0.223695	-29.835	-28.8419	-17.4318	-31.6765	-43.8221	-30.3991	-50.569
0.712124	-43.0479	-1.25797	-36.3554	-39.1985	0	-27.9773	-0.591248	31.0468	-410.062		-20.14	0.222576	-29.8674	-28.8768	-17.4318	-31.7014	-43.8226	-30.3715	-50.934
0.713014	-42.5698	-1.25797	-36.2674	-38.9595	0	-27.2351	-0.050319	29.8391	-396.438		-20.1779	0.221456	-29.8997	-28.9115	-17.4318	-31.7256	-43.8227	-30.3449	-51.2868
0.713904	-42.0541	-1.25797	-36.8586	-39.0098	0	-26.5307	0.176116	28.317	-377.203		-20.2153	0.220337	-29.9325	-28.9462	-17.4318	-31.7492	-43.8225	-30.3197	-51.6225
0.714794	-42.0918	-1.25797	-37.0096	-39.1733	0	-25.713	0.037739	26.9584	-346.295		-20.2528	0.219217	-29.9654	-28.9811	-17.4318	-31.7721	-43.8225	-30.2957	-51.9307
0.715685	-41.5131	-1.25797	-37.7644	-38.9846	0	-24.6563	0	25.713	-306.367		-20.2897	0.218097	-29.999	-29.0158	-17.4318	-31.7941	-43.8225	-30.2728	-52.2034
0.716575	-41.5006	-1.25797	-38.5821	-38.7708	0	-23.5115	0	24.606	-270.049		-20.3267	0.216978	-30.0334	-29.0503	-17.4318	-31.815	-43.8225	-30.2509	-52.4437
0.717465	-41.5886	-1.25797	-38.3556	-38.7079	0	-23.1467	0	23.6751	-235.04		-20.3637	0.215858	-30.0675	-29.0847	-17.4318	-31.8356	-43.8225	-30.2299	-52.6529
0.718355	-41.3999	-1.25797	-37.8776	-38.7959	0	-24.0273	0	23.1467	-203.88		-20.4005	0.214739	-30.1012	-29.1192	-17.4318	-31.857	-43.8225	-30.2093	-52.8344
0.719245	-40.4187	-1.25797	-37.8147	-38.5569	0	-27.9019	0	22.6813	-188.985		-20.4365	0.213619	-30.1349	-29.1536	-17.4318	-31.8818	-43.8225	-30.1891	-53.0026
0.720135	-40.2048	-1.25797	-37.1983	-39.4878	0	-36.7077	0	22.3542	-181.173		-20.4723	0.212499	-30.168	-29.1887	-17.4318	-31.9145	-43.8225	-30.1692	-53.1638
0.721025	-39.1482	-1.25797	-36.2422	-39.6513	0	-51.2373	0	21.8636	-174.544		-20.5071	0.21138	-30.2002	-29.224	-17.4318	-31.9601	-43.8225	-30.1497	-53.3191
0.721916	-38.494	-1.25797	-36.1919	-39.5381	0	-71.4781	0	21.3352	-163.801		-20.5414	0.21026	-30.2324	-29.2592	-17.4318	-32.0237	-43.8225	-30.1307	-53.4649
0.722806	-38.3556	-1.25797	-36.1164	-39.3494	0	-94.3984	0	20.6811	-149.611		-20.5755	0.209141	-30.2646	-29.2942	-17.4318	-32.1077	-43.8225	-30.1123	-53.5981
0.723696	-37.9908	-1.25797	-35.8145	-39.1607	0	-119.784	0	19.9011	-137.887		-20.6093	0.208021	-30.2964	-29.329	-17.4318	-32.2143	-43.8225	-30.0946	-53.7208
0.724586	-37.9405	-1.25797	-35.4874	-38.6953	0	-144.893	0	18.9702	-127.659		-20.6431	0.206901	-30.328	-29.3635	-17.4318	-32.3433	-43.8225	-30.0777	-53.8344
0.725476	-37.865	-1.25797	-35.261	-39.2614	0	-166.669	0	18.0645	-117.96		-20.6768	0.205782	-30.3594	-29.3984	-17.4318	-32.4916	-43.8225	-30.0616	-53.9394
0.726366	-37.3744	-1.25797	-34.6572	-39.9281	0	-182.708	0	16.9952	-109.154		-20.7101	0.204662	-30.3903	-29.434	-17.4318	-32.6542	-43.8225	-30.0465	-54.0365
0.727257	-37.1102	-1.25797	-34.2043	-39.8904	0	-204.106	0	15.9511	-101.908		-20.7431	0.203543	-30.4207	-29.4695	-17.4318	-32.8359	-43.8225	-30.0323	-54.1272
0.728147	-37.0473	-1.25797	-34.154	-40.469	0	-218.699	0	15.0328	-94.6625		-20.7761	0.202423	-30.4511	-29.5055	-17.4318	-33.0305	-43.8225	-30.0189	-54.2115
0.729037	-37.1354	-1.25797	-34.4182	-40.2174	0	-229.404	0	14.2151	-87.8192		-20.8091	0.201304	-30.4817	-29.5413	-17.4318	-33.2347	-43.8225	-30.0063	-54.2897
0.729927	-37.4625	-1.25797	-34.4056	-39.1356	0	-248.525	0	13.5735	-82.6866		-20.8425	0.200184	-30.5123	-29.5761	-17.4318	-33.4559	-43.8225	-29.9942	-54.3632
0.730817	-37.5631	-1.25797	-34.8207	-38.5443	0	-270.791	0	13.1584	-78.0447		-20.8759	0.199064	-30.5433	-29.6104	-17.4318	-33.6969	-43.8225	-29.9825	-54.4327
0.731707	-38.5443	-1.25797	-35.022	-39.1104	0	-281.308	0	12.7936	-73.8934		-20.9102	0.197945	-30.5745	-29.6452	-17.4318	-33.9472	-43.8225	-29.9711	-54.4985
0.732597	-39.123	-1.25797	-35.2233	-38.7079	0	-295.284	0	12.4791	-70.8491		-20.945	0.196825	-30.6059	-29.6797	-17.4318	-34.21	-43.8225	-29.96	-54.5615
0.733488	-39.0978	-1.25797	-34.7704	-38.6827	0	-301.562	0	12.2778	-67.7922		-20.9798	0.195706	-30.6368	-29.7141	-17.4318	-34.4784	-43.8225	-29.9491	-54.6219
0.734378	-38.9091	-1.25797	-34.3553	-39.3494	0	-302.266	0	12.1646	-65.1882		-21.0145	0.194586	-30.6674	-29.7491	-17.4318	-34.7474	-43.8225	-29.9383	-54.6799
0.735268	-39.211	-1.25797	-34.1163	-39.0978	0	-298.756	0	12.0765	-63.2635		-21.0493	0.193466	-30.6977	-29.7839	-17.4318	-35.0133	-43.8225	-29.9275	-54.7362
0.736158	-38.0286	-1.25797	-33.9527	-38.4185	0	-303.927	0	12.0388	-60.9614		-21.0832	0.192347	-30.728	-29.8181	-17.4318	-35.2838	-43.8225	-29.9168	-54.7904
0.737048	-37.3744	-1.25797	-33.4873	-38.4563	0	-308.216	0	11.9885	-58.2694		-21.1165	0.191227	-30.7578	-29.8523	-17.4318	-35.5581	-43.8225	-29.9061	-54.8423
0.737938	-37.387	-1.25797	-33.286	-37.9908	0	-327.124	0	11.8879	-55.527		-21.1497	0.190108	-30.7874	-29.8861	-17.4318	-35.8493	-43.8225	-29.8955	-54.8917
0.738829	-36.9341	-1.25797	-33.5502	-37.6008	0	-351.604	0	11.8375	-52.6839		-21.1826	0.188988	-30.8172	-29.9196	-17.4318	-36.1622	-43.8225	-29.885	-54.9386
0.739719	-36.4938	-1.25797	-33.6634	-37.475	0	-366.649	0	11.8124	-49.1365		-21.2151	0.187868	-30.8472	-29.953	-17.4318	-36.4885	-43.8225	-29.8745	-54.9823
0.740609	-36.4687	-1.25797	-33.6634	-37.7266	0	-376.914	0	11.7872	-45.8783		-21.2475	0.186749	-30.8772	-29.9865	-17.4318	-36.824	-43.8225	-29.864	-55.0232
0.741499	-36.3051	-1.25797	-33.6131	-37.5631	0	-384.739	0	11.7117	-42.4818		-21.2799	0.185629	-30.9071	-30.02	-17.4318	-37.1664	-43.8225	-29.8536	-55.061
0.742389	-35.8019	-1.25797	-33.676	-37.7518	0	-384.449	0	11.5985	-39.0978		-21.3117	0.18451	-30.9371	-30.0536	-17.4318	-37.5086	-43.8225	-29.8433	-55.0958
0.743279	-36.0661	-1.25797	-33.7137	-37.7392	0	-369.983	0	11.3595	-35.022		-21.3438	0.18339	-30.9671	-30.0872	-17.4318	-37.8378	-43.8225	-29.8331	-55.1269
0.744169	-35.9529	-1.25797	-33.7892	-37.8021	0	-360.334	0	10.9821	-31.1223		-21.3758	0.18227	-30.9971	-30.1208	-17.4318	-38.1585	-43.8225	-29.8234	-55.1546
0.74506	-35.7516	-1.25797	-34.003	-37.7644	0	-347.779	0	10.6676	-26.4049		-21.4076	0.181151	-31.0274	-30.1544	-17.4318	-38.4681	-43.8225	-29.8139	-55.1781
0.74595	-35.7894	-1.25797	-34.1666	-37.626	0	-332.545	0	10.4286	-21.7629		-21.4395	0.180031	-31.0578	-30.1879	-17.4318	-38.764	-43.8225	-29.8046	-55.1975
0.74684	-35.9655	-1.25797	-34.3049	-37.8524	0	-316.456	0	10.2273	-17.6997		-21.4715	0.178912	-31.0883	-30.2216	-17.4318	-39.0457	-43.8225	-29.7955	-55.2133
0.74773	-36.041	-1.25797	-34.1288	-38.1544	0	-299.838	0	10.1141	-14.907		-21.5036	0.177792	-31.1187	-30.2555	-17.4318	-39.3125	-43.8225	-29.7865	-55.2265
0.74862	-36.129	-1.25797	-33.8269	-38.4185	0	-294.454	0	10.0261	-12.7055		-21.5357	0.176672	-31.1488	-30.2897	-17.4318	-39.5746	-43.8225	-29.7776	-55.2378
0.74951	-36.2296	-1.25797	-33.6634	-38.2298	0	-279.534	0	9.83736	-12.0388		-21.568	0.175553	-31.1788	-30.3238	-17.4318	-39.8234	-43.8225	-29.7688	-55.2486
0.750401	-36.4183	-1.24539	-33.915	-38.016	0	-268.842	0	9.61092	-12.0137		-21.6004	0.174444	-31.209	-30.3576	-17.4318	-40.0626	-43.8225	-29.7603	-55.2592
0.751291	-36.6951	-1.23281	-34.0911	-37.6512	0	-255.57	0	9.23353	-12.0137		-21.633	0.173347	-31.2393	-30.3911	-17.4318	-40.2901	-43.8225	-29.752	-55.2699
0.752181	-36.9719	-1.22023	-34.1163	-36.997	0	-243.041	0	8.85614	-11.9885		-21.6659	0.172261	-31.2697	-30.424	-17.4318	-40.5064	-43.8225	-29.7442	-55.2806
0.753071	-36.8461	-1.20765	-34.2672	-36.6574	0	-220.485	0	8.52906	-11.9885		-21.6987	0.171186	-31.3002	-30.4567	-17.4318	-40.7026	-43.8225	-29.7366	-55.2913
0.753961	-36.997	-1.19508	-34.4685	-36.6699	0	-202.509	0	7.92524	-12.0011		-21.7317	0.170123	-31.3308	-30.4893	-17.4318	-40.8829	-43.8225	-29.7295	-55.302
0.754851	-36.7454	-1.19508	-34.632	-36.6448	0	-181.815	0	7.23335	-12.0765		-21.7644	0.169059	-31.3617	-30.5219	-17.4318	-41.0447	-43.8225	-29.7231	-55.3127
0.755741	-36.9719	-1.19508	-34.393	-36.2925	0	-160.933	0	6.88112	-12.2527		-21.7973	0.167995	-31.3923	-30.5542	-17.4318	-41.1879	-43.8225	-29.717	-55.3236
0.756632	-36.0032	-1.19508	-34.1414	-36.4183	0	-139.371	0	6.62952	-12.5797		-21.8293	0.166932	-31.4227	-30.5866	-17.4318	-41.312	-43.8225	-29.7111	-55.3348
0.757522	-35.739	-1.19508	-33.7766	-36.2925	0	-121.005	0	6.32761	-13.2087		-21.8611	0.165868	-31.4527	-30.6189	-17.4318	-41.4197	-43.8225	-29.7054	-55.3466
0.758412	-35.5126	-0.95606	-33.3992	-35.89	0	-106.349	0	6.34019	-14.3283		-21.8927	0.165017	-31.4824	-30.6509	-17.4318	-41.5143	-43.8225	-29.6998	-55.3593
0.759302	-35.0849	-0.717045	-32.5815	-35.8271	0	-90.6496	0	6.23955	-15.5234		-21.924	0.164379	-31.5114	-30.6828	-17.4318	-41.595	-43.8225	-29.6942	-55.3731
0.760192	-33.8521	-0.47803	-32.179	-35.7894	0	-76.8119	0	5.84958	-16.5046		-21.9541	0.163954	-31.5401	-30.7146	-17.4318	-41.6633	-43.8225	-29.689	-55.3878
0.761082	-33.6131	-0.239015	-31.9903	-35.4371	0	-64.8611	0	5.22059	-17.1588		-21.984	0.163741	-31.5686	-30.7461	-17.4318	-41.7211	-43.8225	-29.6844	-55.4031
0.761973	-33.8647	0	-31.8645	-35.3113	0	-51.3128	0	4.70482	-17.4481		-22.0141	0.163741	-31.5969	-30.7776	-17.4318	-41.7667	-43.8225	-29.6802	-55.4186
0.762863	-33.4998	0	-31.5751	-35.2233	0	-38.3934	0	4.08842	-16.9701		-22.044	0.163741	-31.625	-30.8089	-17.4318	-41.8009	-43.8225	-29.6765	-55.4337
0.763753	-33.8521	0	-32.2419	-35.1478	0	-27.8767	0	3.64812	-16.0392		-22.0741	0.163741	-31.6537	-30.8402	-17.4318	-41.8257	-43.8225	-29.6733	-55.448
0.764643	-33.9779	0	-32.9086	-35.1981	0	-19.8508	0	3.33363	-15.0579		-22.1043	0.163741	-31.683	-30.8715	-17.4318	-41.8434	-43.8225	-29.6703	-55.4614
0.765533	-34.1792	0	-33.2734	-35.0723	0	-14.3786	0	2.96882	-14.1899		-22.1347	0.163741	-31.7126	-30.9027	-17.4318	-41.8562	-43.8225	-29.6677	-55.474
0.766423	-33.5502	0	-33.7514	-34.8585	0	-13.0075	0	2.44047	-13.2716		-22.1646	0.163741	-31.7427	-30.9338	-17.4318	-41.8678	-43.8225	-29.6655	-55.4858
0.767314	-33.9024	0	-33.8898	-34.9843	0	-14.1396	0	1.97502	-12.6049		-22.1948	0.163741	-31.7728	-30.9649	-17.4318	-41.8803	-43.8225	-29.6638	-55.4971
0.768204	-33.9905	0	-33.1728	-34.632	0	-16.3411	0	1.57247	-12.2652		-22.225	0.163741	-31.8023	-30.9957	-17.4318	-41.8949	-43.8225	-29.6624	-55.508
0.769094	-34.1792	0	-32.6318	-34.3427	0	-18.1777	0	1.22023	-12.1269		-22.2554	0.163741	-31.8314	-31.0263	-17.4318	-41.9111	-43.8225	-29.6613	-55.5188
0.769984	-34.5314	0	-32.3802	-34.2798	0	-19.7628	0	1.13218	-12.0388		-22.2862	0.163741	-31.8602	-31.0568	-17.4318	-41.9287	-43.8225	-29.6603	-55.5295
0.770874	-35.4874	0	-31.6632	-34.7704	0	-20.266	0	1.06928	-12.0262		-22.3178	0.163741	-31.8884	-31.0877	-17.4318	-41.9467	-43.8225	-29.6593	-55.5402
0.771764	-35.8523	0	-31.5626	-34.4056	0	-20.5805	0	1.03154	-12.0388		-22.3497	0.163741	-31.9165	-31.1184	-17.4318	-41.965	-43.8225	-29.6584	-55.5509
0.772654	-36.3429	0	-31.5877	-34.6698	0	-21.134	0	0.918321	-12.0262		-22.382	0.163741	-31.9446	-31.1492	-17.4318	-41.9838	-43.8225	-29.6576	-55.5616
0.773545	-36.7454	0	-31.4368	-34.6069	0	-21.9516	0	0.704465	-12.0011		-22.4147	0.163741	-31.9726	-31.18	-17.4318	-42.0034	-43.8225	-29.657	-55.5723
0.774435	-37.1354	0	-31.2607	-34.5691	0	-22.6813	0	0.49061	-11.9256		-22.4478	0.163741	-32.0004	-31.2108	-17.4318	-42.0235	-43.8225	-29.6565	-55.5829
0.775325	-36.6196	0	-31.7135	-34.003	0	-23.1845	0	0.46545	-11.7998		-22.4804	0.163741	-32.0286	-31.2411	-17.4318	-42.0442	-43.8225	-29.6561	-55.5934
0.776215	-36.1164	0	-31.7135	-33.915	0	-23.5115	0	0.402552	-11.6866		-22.5125	0.163741	-32.0568	-31.2712	-17.4318	-42.0651	-43.8225	-29.6557	-55.6038
0.777105	-35.261	0	-31.8142	-33.4244	0	-23.5619	0	0.452871	-11.5985		-22.5439	0.163741	-32.0851	-31.301	-17.4318	-42.0861	-43.8225	-29.6553	-55.6141
0.777995	-34.4307	0	-31.8771	-33.1225	0	-23.3857	0	0.540929	-11.5482		-22.5745	0.163741	-32.1135	-31.3305	-17.4318	-42.1069	-43.8225	-29.6549	-55.6244
0.778886	-33.0344	0	-32.028	-32.808	0	-23.0461	0	0.46545	-11.4727		-22.6039	0.163741	-32.142	-31.3597	-17.4318	-42.1274	-43.8225	-29.6544	-55.6346
0.779776	-32.6067	0	-31.8142	-32.5438	0	-22.09	0	0.364812	-11.5356		-22.633	0.163741	-32.1703	-31.3886	-17.4318	-42.1471	-43.8225	-29.6541	-55.6449
0.780666	-32.5186	0	-31.7387	-32.1538	0	-20.7314	0	0.327073	-11.5608		-22.6619	0.163741	-32.1986	-31.4172	-17.4318	-42.1655	-43.8225	-29.6538	-55.6552
0.781556	-32.657	0	-31.5877	-31.8393	0	-18.9577	0	0.226435	-11.5608		-22.691	0.163741	-32.2267	-31.4456	-17.4318	-42.1824	-43.8225	-29.6536	-55.6655
0.782446	-32.7702	0	-31.4745	-31.4619	0	-17.5362	0	0.150957	-11.4979		-22.7201	0.163741	-32.2547	-31.4736	-17.4318	-42.198	-43.8225	-29.6535	-55.6757
0.783336	-33.135	0	-31.1978	-31.3864	0	-15.775	0	0.138377	-11.5734		-22.7496	0.163741	-32.2825	-31.5015	-17.4318	-42.212	-43.8225	-29.6534	-55.686
0.784226	-33.1099	0	-31.1349	-31.1349	0	-14.2151	0	0.176116	-11.4979		-22.7791	0.163741	-32.3102	-31.5292	-17.4318	-42.2247	-43.8225	-29.6532	-55.6962
0.785117	-32.5815	0	-30.8958	-31.072	0	-13.0075	0	0.176116	-11.3847		-22.8081	0.163741	-32.3377	-31.5569	-17.4318	-42.2363	-43.8225	-29.6531	-55.7064
0.786007	-32.1161	0	-30.6065	-31.1852	0	-12.0262	0	0.176116	-11.3343		-22.8367	0.163741	-32.3649	-31.5846	-17.4318	-42.247	-43.8225	-29.6529	-55.7164
0.786897	-31.6632	0	-30.3549	-31.2355	0	-10.5041	0	0.201276	-11.2966		-22.8648	0.163741	-32.3919	-31.6124	-17.4318	-42.2563	-43.8225	-29.6527	-55.7265
0.787787	-31.2229	0	-30.443	-31.1726	0	-8.74292	0	0.201276	-11.1456		-22.8926	0.163741	-32.419	-31.6402	-17.4318	-42.2641	-43.8225	-29.6525	-55.7364
0.788677	-30.921	0	-30.7449	-31.3613	0	-7.0195	0	0.188696	-10.9821		-22.9202	0.163741	-32.4464	-31.6681	-17.4318	-42.2703	-43.8225	-29.6524	-55.7462
0.789567	-30.7071	0	-31.072	-31.4493	0	-5.29607	0	0.150957	-10.8437		-22.9475	0.163741	-32.4741	-31.6961	-17.4318	-42.275	-43.8225	-29.6522	-55.7558
0.790458	-30.4681	0	-31.4116	-31.7261	0	-3.59781	0	0.125797	-10.6173		-22.9746	0.163741	-32.502	-31.7243	-17.4318	-42.2782	-43.8225	-29.6521	-55.7653
0.791348	-30.204	0	-31.6506	-32.4809	0	-2.23919	0	0.088058	-10.4663		-23.0015	0.163741	-32.5302	-31.7532	-17.4318	-42.2802	-43.8225	-29.6521	-55.7746
0.792238	-30.1788	0	-31.7513	-32.7954	0	-1.58505	0	0.088058	-10.4789		-23.0283	0.163741	-32.5584	-31.7824	-17.4318	-42.2817	-43.8225	-29.652	-55.7839
0.793128	-30.292	0	-31.55	-32.6822	-0.025159	-1.08186	0	0.01258	-10.655		-23.0553	0.163741	-32.5865	-31.8115	-17.4319	-42.2826	-43.8225	-29.652	-55.7934
0.794018	-30.2417	0	-31.6255	-32.7954	-0.327073	-0.880582	0	0	-10.8815		-23.0822	0.163741	-32.6147	-31.8407	-17.4322	-42.2834	-43.8225	-29.652	-55.8031
0.794908	-30.1788	0	-31.9022	-32.8457	-0.792524	-1.08186	0	0	-10.9947		-23.1091	0.163741	-32.6431	-31.8699	-17.4329	-42.2844	-43.8225	-29.652	-55.8129
0.795798	-30.1285	0	-32.179	-32.3174	-1.55989	-1.62279	0	0	-10.8941		-23.1359	0.163741	-32.6717	-31.8987	-17.4342	-42.2858	-43.8225	-29.652	-55.8226
0.796689	-30.204	0	-32.3048	-31.9903	-2.88076	-2.37757	0	0	-10.7683		-23.1628	0.163741	-32.7004	-31.9272	-17.4368	-42.2879	-43.8225	-29.652	-55.8322
0.797579	-29.7637	0	-32.5312	-32.0029	-4.60419	-3.13236	0	0	-10.5544		-23.1893	0.163741	-32.7294	-31.9556	-17.4409	-42.2907	-43.8225	-29.652	-55.8416
0.798469	-29.6756	0	-32.6444	-31.7387	-6.35277	-3.71102	0	0	-10.3028		-23.2157	0.163741	-32.7585	-31.9839	-17.4466	-42.294	-43.8225	-29.652	-55.8507
0.799359	-29.575	-0.251595	-32.5186	-31.1978	-8.06361	-3.87456	0	0	-10.2776		-23.242	0.163517	-32.7874	-32.0116	-17.4537	-42.2975	-43.8225	-29.652	-55.8599
0.800249	-29.9649	-0.50319	-32.4054	-31.1097	-9.5606	-3.48459	0	0	-10.4286		-23.2687	0.163069	-32.8162	-32.0393	-17.4623	-42.3006	-43.8225	-29.652	-55.8692
0.801139	-30.1788	-0.754784	-32.2167	-31.0594	-10.5167	-2.55369	0	-0.226435	-10.4538		-23.2955	0.162398	-32.8449	-32.067	-17.4716	-42.3028	-43.8225	-29.6522	-55.8785
0.80203	-32.1287	-1.00638	-31.94	-30.6317	-11.0324	-1.69826	0	-0.679306	-10.4663		-23.3241	0.161502	-32.8733	-32.0942	-17.4814	-42.3043	-43.8225	-29.6528	-55.8878
0.80292	-33.1979	-1.00638	-31.6632	-30.4807	-11.2714	-0.817683	0	-1.13218	-10.4915		-23.3537	0.160606	-32.9015	-32.1214	-17.4915	-42.3051	-43.8225	-29.6538	-55.8971
0.80381	-34.1037	-0.754784	-31.4242	-30.4052	-11.4476	-0.276754	0	-1.13218	-10.4915		-23.384	0.159934	-32.9295	-32.1484	-17.5016	-42.3053	-43.8225	-29.6548	-55.9065
0.8047	-34.5188	-0.50319	-31.9903	-30.2794	-11.435	-0.037739	0	-1.13218	-10.4915		-23.4147	0.159487	-32.958	-32.1754	-17.5118	-42.3054	-43.8225	-29.6558	-55.9158
0.80559	-35.0723	-0.251595	-32.5564	-30.0027	-11.435	-0.100638	0	-0.905741	-10.6425		-23.4459	0.159263	-32.9869	-32.2021	-17.522	-42.3054	-43.8225	-29.6566	-55.9253
0.80648	-34.4307	0	-32.9338	-30.1285	-11.4476	-0.125797	0	-0.452871	-10.8941		-23.4766	0.159263	-33.0162	-32.2289	-17.5322	-42.3056	-43.8225	-29.657	-55.935
0.80737	-34.5691	0	-33.4747	-30.1033	-11.4727	-0.125797	0	0	-11.0828		-23.5074	0.159263	-33.046	-32.2557	-17.5424	-42.3057	-43.8225	-29.657	-55.9448
0.808261	-34.5817	0	-33.8269	-30.292	-11.4224	-0.125797	0	0	-11.2463		-23.5381	0.159263	-33.0761	-32.2826	-17.5526	-42.3058	-43.8225	-29.657	-55.9548
0.809151	-34.0534	0	-33.2734	-30.531	-11.435	-0.327073	0	0	-11.284		-23.5684	0.159263	-33.1058	-32.3098	-17.5627	-42.3061	-43.8225	-29.657	-55.9649
0.810041	-33.8269	0	-32.8709	-31.0091	-11.2714	-0.540929	0	0	-11.2085		-23.5985	0.159263	-33.135	-32.3374	-17.5728	-42.3066	-43.8225	-29.657	-55.9748
0.810931	-33.047	0	-32.5564	-31.3613	-10.9444	-0.792524	0	0	-11.0324		-23.628	0.159263	-33.164	-32.3653	-17.5825	-42.3073	-43.8225	-29.657	-55.9847
0.811821	-31.9651	0	-32.3551	-31.5626	-10.5041	-0.855422	0	0	-10.9318		-23.6564	0.159263	-33.1928	-32.3934	-17.5919	-42.308	-43.8225	-29.657	-55.9944
0.812711	-31.3613	0	-32.2419	-31.7387	-9.59834	-0.855422	0	0	-10.8186		-23.6843	0.159263	-33.2215	-32.4217	-17.6004	-42.3088	-43.8225	-29.657	-56.004
0.813602	-31.4745	0	-32.3048	-31.6255	-7.92524	-0.641567	0	0	-10.7683		-23.7123	0.159263	-33.2502	-32.4498	-17.6075	-42.3094	-43.8225	-29.657	-56.0136
0.814492	-30.8329	0	-32.3928	-31.4745	-5.82442	-0.47803	0	0	-10.6676		-23.7398	0.159263	-33.2791	-32.4778	-17.6126	-42.3098	-43.8225	-29.657	-56.0231
0.815382	-30.2669	0	-32.6193	-31.1852	-3.87456	-0.264175	0	0	-10.6802		-23.7667	0.159263	-33.3081	-32.5056	-17.6161	-42.31	-43.8225	-29.657	-56.0326
0.816272	-30.0278	0	-32.8709	-31.2858	-2.00018	-0.301914	0	0	-10.6425		-23.7934	0.159263	-33.3373	-32.5334	-17.6179	-42.3103	-43.8225	-29.657	-56.0421
0.817162	-30.0153	0	-33.1728	-31.2984	-0.603827	-0.352233	0	0	-10.6928		-23.8202	0.159263	-33.3669	-32.5613	-17.6184	-42.3106	-43.8225	-29.657	-56.0516
0.818052	-30.3423	0	-33.5753	-31.1474	0	-0.515769	0	0	-10.7683		-23.8472	0.159263	-33.3967	-32.589	-17.6184	-42.3111	-43.8225	-29.657	-56.0612
0.818942	-30.8455	0	-34.154	-30.9713	0.062899	-0.515769	0	0	-10.8689		-23.8746	0.159263	-33.4271	-32.6166	-17.6184	-42.3115	-43.8225	-29.657	-56.0709
0.819833	-31.7009	0	-34.6069	-30.7952	0.918321	-0.50319	0	0	-10.7557		-23.9028	0.159263	-33.4579	-32.644	-17.6175	-42.312	-43.8225	-29.657	-56.0804
0.820723	-32.418	0	-34.9088	-30.7071	2.51595	-0.427711	0	0	-10.8689		-23.9317	0.159263	-33.489	-32.6713	-17.6153	-42.3123	-43.8225	-29.657	-56.0901
0.821613	-32.3928	0	-35.3239	-30.4933	4.34001	-0.415131	0	0	-10.957		-23.9605	0.159263	-33.5204	-32.6984	-17.6114	-42.3127	-43.8225	-29.657	-56.0999
0.822503	-31.8016	0	-35.7013	-30.5059	6.16407	-0.251595	0	0	-11.0324		-23.9888	0.159263	-33.5522	-32.7256	-17.606	-42.3129	-43.8225	-29.657	-56.1097
0.823393	-31.16	0	-36.0787	-30.6442	7.7617	-0.251595	0	0	-11.1456		-24.0165	0.159263	-33.5843	-32.7529	-17.599	-42.3132	-43.8225	-29.657	-56.1196
0.824283	-30.5436	0	-36.4812	-30.9965	8.52906	-0.364812	0	0	-11.3847		-24.0437	0.159263	-33.6168	-32.7805	-17.5915	-42.3135	-43.8225	-29.657	-56.1297
0.825174	-29.8391	0	-36.997	-30.9587	8.15167	-0.49061	0	0	-11.4853		-24.0703	0.159263	-33.6497	-32.808	-17.5842	-42.3139	-43.8225	-29.657	-56.1399
0.826064	-29.4995	0	-37.4247	-31.2103	7.13271	-0.49061	0	0	-11.5482		-24.0965	0.159263	-33.683	-32.8358	-17.5778	-42.3144	-43.8225	-29.657	-56.1502
0.826954	-29.3737	0	-38.6827	-31.4493	5.73636	-0.553509	0	0	-11.6237		-24.1227	0.159263	-33.7175	-32.8638	-17.5727	-42.3148	-43.8225	-29.657	-56.1606
0.827844	-29.3989	0	-38.972	-31.789	4.18905	-0.553509	0	0	-11.6992		-24.1488	0.159263	-33.7521	-32.8921	-17.569	-42.3153	-43.8225	-29.657	-56.171
0.828734	-29.185	0	-39.2865	-31.8142	2.62917	-0.515769	0	0	-11.8124		-24.1748	0.159263	-33.7871	-32.9204	-17.5667	-42.3158	-43.8225	-29.657	-56.1815
0.829624	-29.185	-0.251595	-39.5884	-31.9525	1.49699	-0.440291	0	0.01258	-11.9004		-24.2008	0.159039	-33.8223	-32.9488	-17.5653	-42.3162	-43.8225	-29.657	-56.1921
0.830515	-29.1095	-0.251595	-40.0791	-31.8896	0.767364	-0.515769	0	0.01258	-12.1143		-24.2267	0.158815	-33.858	-32.9772	-17.5647	-42.3167	-43.8225	-29.657	-56.2029
0.831405	-28.9963	-0.50319	-39.6388	-31.9651	0.339653	-0.566088	0	0.050319	-12.3533		-24.2525	0.158367	-33.8933	-33.0056	-17.5644	-42.3172	-43.8225	-29.6569	-56.2139
0.832295	-28.9837	-0.754784	-40.0036	-31.7387	0.289334	-0.540929	0	0.088058	-12.7559		-24.2783	0.157695	-33.9289	-33.0339	-17.5641	-42.3176	-43.8225	-29.6569	-56.2252
0.833185	-29.5246	-1.00638	-40.5068	-31.7387	0.251595	-0.528349	0	0.088058	-13.3345		-24.3046	0.1568	-33.965	-33.0621	-17.5639	-42.3181	-43.8225	-29.6568	-56.2371
0.834075	-30.2165	-1.00638	-40.4313	-31.6884	0.163537	-0.641567	0	0.075478	-13.9258		-24.3315	0.155904	-34.0009	-33.0903	-17.5637	-42.3187	-43.8225	-29.6567	-56.2495
0.834965	-31.0216	-1.25797	-40.5445	-31.7764	0.088058	-0.855422	0	0.075478	-14.3535		-24.3591	0.154784	-34.037	-33.1186	-17.5637	-42.3194	-43.8225	-29.6566	-56.2622
0.835855	-31.7261	-1.25797	-40.6829	-31.8896	0.075478	-1.0567	0	0.037739	-14.8693		-24.3873	0.153665	-34.0732	-33.147	-17.5636	-42.3204	-43.8225	-29.6566	-56.2755
0.836746	-31.8267	-1.25797	-40.6577	-32.1161	0.025159	-1.30829	0	0	-15.4228		-24.4156	0.152545	-34.1094	-33.1756	-17.5636	-42.3215	-43.8225	-29.6566	-56.2892
0.837636	-31.3613	-1.25797	-40.708	-31.94	0	-1.42151	0	0	-15.6995		-24.4436	0.151425	-34.1456	-33.204	-17.5636	-42.3228	-43.8225	-29.6566	-56.3032
0.838526	-30.4052	-1.25797	-40.8842	-32.0783	0	-1.54731	0	0.037739	-16.0266		-24.4706	0.150306	-34.182	-33.2326	-17.5636	-42.3242	-43.8225	-29.6566	-56.3174
0.839416	-29.4995	-1.25797	-40.708	-32.028	0	-1.52215	0	0.868002	-16.3914		-24.4969	0.149186	-34.2183	-33.2611	-17.5636	-42.3255	-43.8225	-29.6558	-56.332
0.840306	-29.0969	-1.25797	-40.5445	-32.0532	0	-1.34603	0	2.41531	-16.6556		-24.5228	0.148067	-34.2543	-33.2896	-17.5636	-42.3267	-43.8225	-29.6537	-56.3469
0.841196	-28.5434	-1.25797	-40.708	-31.9903	0	-1.23281	0	4.59161	-16.6304		-24.5482	0.146947	-34.2906	-33.3181	-17.5636	-42.3278	-43.8225	-29.6496	-56.3617
0.842087	-27.8893	-1.25797	-40.7835	-32.2922	0	-1.30829	0	6.74274	-16.5675		-24.573	0.145827	-34.3269	-33.3468	-17.5636	-42.329	-43.8225	-29.6436	-56.3764
0.842977	-27.7132	-1.25797	-41.01	-32.3928	0	-1.35861	0	9.14547	-16.2908		-24.5977	0.144708	-34.3634	-33.3756	-17.5636	-42.3302	-43.8225	-29.6354	-56.3909
0.843867	-27.5622	-1.25797	-41.4502	-32.7702	0	-1.52215	0	10.9821	-15.6995		-24.6222	0.143588	-34.4003	-33.4048	-17.5636	-42.3316	-43.8225	-29.6257	-56.4049
0.844757	-27.1471	-1.25797	-41.727	-32.4935	0	-1.83664	0	12.2527	-14.9951		-24.6463	0.142469	-34.4374	-33.4337	-17.5636	-42.3332	-43.8225	-29.6147	-56.4182
0.845647	-27.8264	-1.25797	-42.0289	-32.2922	0	-2.00018	0	12.9571	-14.1648		-24.6711	0.141349	-34.4748	-33.4625	-17.5636	-42.335	-43.8225	-29.6032	-56.4308
0.846537	-28.3296	-1.25797	-42.2805	-32.2293	0	-2.01276	0	13.7874	-13.3848		-24.6963	0.140229	-34.5124	-33.4911	-17.5636	-42.3368	-43.8225	-29.5909	-56.4427
0.847427	-28.4302	-1.25797	-42.6076	-32.2922	0	-1.74858	0	14.3157	-12.7307		-24.7216	0.13911	-34.5504	-33.5199	-17.5636	-42.3383	-43.8225	-29.5782	-56.4541
0.848318	-28.3044	-1.25797	-42.7585	-32.0532	0	-1.52215	0	14.4919	-12.3785		-24.7468	0.13799	-34.5884	-33.5484	-17.5636	-42.3397	-43.8225	-29.5653	-56.4651
0.849208	-28.3044	-1.25797	-42.9598	-32.2419	0	-1.39635	0	14.4919	-12.0262		-24.772	0.136871	-34.6266	-33.5771	-17.5636	-42.3409	-43.8225	-29.5524	-56.4758
0.850098	-27.298	-1.25797	-43.1862	-32.4683	0	-1.27055	0	14.1019	-11.4727		-24.7963	0.135751	-34.6651	-33.606	-17.5636	-42.3421	-43.8225	-29.5399	-56.486
0.850988	-26.7697	-1.50957	-43.5259	-32.4683	0	-1.23281	0	13.5735	-9.43481		-24.8201	0.134408	-34.7038	-33.6349	-17.5636	-42.3432	-43.8225	-29.5278	-56.4944
0.851878	-26.9206	-1.76116	-43.9159	-32.1035	0	-1.33345	0	13.02	-7.03207		-24.8441	0.13284	-34.7429	-33.6635	-17.5636	-42.3443	-43.8225	-29.5162	-56.5007
0.852768	-26.7319	-2.01276	-43.8027	-31.8016	0	-1.35861	0	12.5546	-4.61676		-24.8679	0.131049	-34.7819	-33.6918	-17.5636	-42.3455	-43.8225	-29.505	-56.5048
0.853659	-26.3042	-2.26435	-43.6643	-31.7261	0	-1.19508	0	12.0891	-2.30209		-24.8913	0.129034	-34.8207	-33.72	-17.5636	-42.3466	-43.8225	-29.4943	-56.5068
0.854549	-26.3923	-2.51595	-43.4378	-31.6632	0	-1.01896	0	11.913	-0.389972		-24.9148	0.126794	-34.8594	-33.7482	-17.5636	-42.3475	-43.8225	-29.4837	-56.5072
0.855439	-26.4678	-2.51595	-42.9347	-31.7638	0	-0.905741	0	11.6866	-0.01258		-24.9383	0.124555	-34.8976	-33.7765	-17.5636	-42.3483	-43.8225	-29.4733	-56.5072
0.856329	-25.8765	-2.51595	-42.5447	-31.9651	0	-0.993799	-0.226435	11.3595	0		-24.9614	0.122316	-34.9355	-33.8049	-17.5636	-42.3492	-43.8227	-29.4631	-56.5072
0.857219	-25.3985	-2.51595	-42.7208	-32.1664	0	-1.03154	-0.226435	10.6299	0		-24.984	0.120077	-34.9735	-33.8335	-17.5636	-42.3501	-43.8229	-29.4537	-56.5072
0.858109	-25.0337	-2.51595	-43.1233	-32.1035	0	-1.13218	-0.226435	9.39706	0		-25.0063	0.117838	-35.0119	-33.8621	-17.5636	-42.3511	-43.8231	-29.4453	-56.5072
0.858999	-24.8324	-2.51595	-43.5385	-32.267	0	-1.32087	-0.452871	7.573	0		-25.0284	0.115598	-35.0506	-33.8908	-17.5636	-42.3523	-43.8235	-29.4386	-56.5072
0.85989	-24.7947	-2.51595	-43.702	-32.4935	0	-1.39635	-0.905741	5.49735	0		-25.0504	0.113359	-35.0895	-33.9198	-17.5636	-42.3536	-43.8243	-29.4337	-56.5072
0.86078	-24.9834	-2.51595	-43.6391	-32.9338	0	-1.24539	-1.1196	3.42169	0		-25.0727	0.11112	-35.1284	-33.9491	-17.5636	-42.3547	-43.8253	-29.4306	-56.5072
0.86167	-25.1972	-2.51595	-43.7901	-33.3363	0	-1.20765	-1.57247	1.77374	0		-25.0951	0.108881	-35.1673	-33.9787	-17.5636	-42.3557	-43.8267	-29.4291	-56.5072
0.86256	-25.3608	-2.51595	-43.9913	-33.7389	0	-1.24539	-2.01276	0.654146	0		-25.1177	0.106642	-35.2065	-34.0088	-17.5636	-42.3568	-43.8285	-29.4285	-56.5072
0.86345	-26.191	-2.51595	-44.2178	-33.8018	0	-1.22023	-2.23919	0.163537	0		-25.141	0.104402	-35.2458	-34.0388	-17.5636	-42.3579	-43.8305	-29.4283	-56.5072
0.86434	-26.4049	-2.51595	-45.4632	-33.7766	0	-1.25797	-2.23919	0.01258	0		-25.1645	0.102163	-35.2863	-34.0689	-17.5636	-42.3591	-43.8325	-29.4283	-56.5072
0.865231	-26.7194	-2.51595	-46.7086	-33.3237	0	-1.43409	-2.23919	0	0		-25.1882	0.099924	-35.3279	-34.0986	-17.5636	-42.3603	-43.8345	-29.4283	-56.5072
0.866121	-26.9458	-2.51595	-47.4634	-32.9086	0	-1.34603	-2.23919	-0.113218	0		-25.2122	0.0976848	-35.3701	-34.1279	-17.5636	-42.3615	-43.8364	-29.4284	-56.5072
0.867011	-26.971	-2.51595	-47.7275	-33.2608	0	-1.22023	-2.25177	-0.654146	0		-25.2362	0.0954456	-35.4126	-34.1575	-17.5636	-42.3626	-43.8385	-29.429	-56.5072
0.867901	-26.2036	-2.51595	-47.7779	-33.2986	0	-1.35861	-2.23919	-2.46563	-0.01258		-25.2595	0.0932064	-35.4551	-34.1871	-17.5636	-42.3638	-43.8404	-29.4312	-56.5072
0.868791	-26.3042	-2.51595	-47.174	-33.2105	0	-1.40893	-2.22661	-4.74256	-0.025159		-25.283	0.0909672	-35.4971	-34.2166	-17.5636	-42.3651	-43.8424	-29.4354	-56.5072
0.869681	-25.8388	-2.51595	-47.3627	-33.6131	0	-1.50957	-2.44047	-7.15787	-0.037739		-25.306	0.088728	-35.5393	-34.2466	-17.5636	-42.3664	-43.8446	-29.4418	-56.5072
0.870571	-25.7633	-2.51595	-48.1678	-33.7514	0	-1.63537	-2.62917	-9.52286	-0.050319		-25.3289	0.0864888	-35.5821	-34.2766	-17.5636	-42.3679	-43.8469	-29.4503	-56.5073
0.871462	-26.5684	-2.51595	-49.9164	-33.5502	0	-1.78632	-2.81786	-12.4791	-0.062899		-25.3525	0.0842497	-35.6266	-34.3065	-17.5636	-42.3695	-43.8494	-29.4614	-56.5073
0.872352	-27.1974	-2.51595	-51.187	-33.676	0	-1.55989	-3.03172	-15.2341	-0.113218		-25.3767	0.0820105	-35.6721	-34.3364	-17.5636	-42.3709	-43.8521	-29.4749	-56.5074
0.873242	-27.1471	-2.51595	-52.6211	-34.0156	0	-1.25797	-3.24557	-17.9135	-0.201276		-25.4009	0.0797713	-35.7189	-34.3667	-17.5636	-42.372	-43.855	-29.4909	-56.5076
0.874132	-27.0968	-2.51595	-53.8287	-33.8521	0	-0.880582	-3.23299	-21.8384	-0.276754		-25.425	0.0775321	-35.7669	-34.3968	-17.5636	-42.3728	-43.8579	-29.5103	-56.5079
0.875022	-26.8326	-2.51595	-54.8728	-34.0911	0	-0.591248	-3.24557	-26.8074	-0.314493		-25.4489	0.0752929	-35.8157	-34.4272	-17.5636	-42.3733	-43.8608	-29.5342	-56.5081
0.875912	-26.5307	-2.51595	-56.1685	-34.1288	0	-0.301914	-3.45943	-32.6696	-0.327073		-25.4725	0.0730537	-35.8657	-34.4576	-17.5636	-42.3735	-43.8639	-29.5632	-56.5084
0.876803	-25.7885	-2.51595	-57.6781	-33.9653	0	-0.138377	-3.45943	-40.3684	-0.276754		-25.4955	0.0708145	-35.917	-34.4878	-17.5636	-42.3737	-43.867	-29.5992	-56.5087
0.877693	-25.2727	-2.51595	-59.2128	-34.3049	0	-0.150957	-3.44685	-52.5204	-0.188696		-25.518	0.0685753	-35.9697	-34.5183	-17.5636	-42.3738	-43.87	-29.6459	-56.5089
0.878583	-25.2853	-2.26435	-60.7476	-34.6572	0	-0.289334	-3.44685	-71.0629	-0.113218		-25.5405	0.06656	-36.0238	-34.5492	-17.5636	-42.3741	-43.8731	-29.7092	-56.509
0.879473	-25.9017	-2.01276	-62.5842	-34.6446	0	-0.427711	-3.64812	-99.1535	-0.075478		-25.5635	0.0647687	-36.0795	-34.58	-17.5636	-42.3744	-43.8763	-29.7974	-56.509
0.880363	-25.3985	-1.76116	-63.5403	-34.7956	0	-0.679306	-3.43427	-138.302	-0.125797		-25.5861	0.0632012	-36.136	-34.611	-17.5636	-42.375	-43.8794	-29.9205	-56.5091
0.881253	-24.8701	-1.50957	-64.9115	-35.6384	0	-0.779944	-3.42169	-182.746	-0.150957		-25.6082	0.0618577	-36.1938	-34.6427	-17.5636	-42.3757	-43.8824	-30.0831	-56.5093
0.882143	-24.2412	-1.25797	-65.8801	-35.4497	0	-0.868002	-3.43427	-232.65	-0.150957		-25.6298	0.0607381	-36.2524	-34.6742	-17.5636	-42.3765	-43.8855	-30.2902	-56.5094
0.883034	-23.7002	-1.25797	-66.8865	-35.2359	0	-0.855422	-3.64812	-284.478	-0.150957		-25.6509	0.0596185	-36.312	-34.7056	-17.5636	-42.3773	-43.8887	-30.5434	-56.5095
0.883924	-22.87	-1.25797	-67.7796	-35.1478	0	-0.717045	-3.64812	-320.142	-0.163537		-25.6713	0.0584989	-36.3723	-34.7369	-17.5636	-42.3779	-43.892	-30.8283	-56.5097
0.884814	-22.5429	-1.00638	-69.025	-35.8774	0	-0.46545	-3.64812	-349.1	-0.150957		-25.6913	0.0576032	-36.4337	-34.7688	-17.5636	-42.3783	-43.8952	-31.139	-56.5098
0.885704	-22.5932	-1.00638	-68.6728	-35.2107	0	-0.427711	-3.64812	-375.09	-0.239015		-25.7114	0.0567076	-36.4948	-34.8001	-17.5636	-42.3787	-43.8985	-31.4728	-56.51
0.886594	-23.0838	-1.00638	-69.2137	-35.0346	0	-0.339653	-3.63555	-391.481	-0.289334		-25.732	0.0558119	-36.5564	-34.8313	-17.5636	-42.379	-43.9017	-31.8213	-56.5103
0.887484	-23.1593	-1.00638	-69.3647	-35.6761	0	-0.226435	-3.43427	-388.89	-0.415131		-25.7526	0.0549162	-36.6182	-34.8631	-17.5636	-42.3792	-43.9048	-32.1674	-56.5107
0.888375	-23.0587	-1.00638	-69.8176	-36.1919	0	-0.301914	-3.23299	-399.294	-0.616407		-25.7731	0.0540205	-36.6803	-34.8953	-17.5636	-42.3795	-43.9077	-32.5227	-56.5112
0.889265	-22.8322	-1.25797	-72.2329	-35.6258	0	-0.327073	-3.23299	-402.111	-0.603827		-25.7934	0.0529009	-36.7446	-34.927	-17.5636	-42.3798	-43.9105	-32.8806	-56.5117
0.890155	-23.109	-1.25797	-74.2582	-35.89	0	-0.364812	-3.23299	-404.476	-0.528349		-25.814	0.0517813	-36.8107	-34.9589	-17.5636	-42.3801	-43.9134	-33.2406	-56.5122
0.891045	-23.0838	-1.25797	-77.3402	-36.4435	0	-0.389972	-3.23299	-405.508	-0.528349		-25.8346	0.0506617	-36.8795	-34.9914	-17.5636	-42.3804	-43.9163	-33.6015	-56.5127
0.891935	-23.3857	-1.25797	-79.7933	-36.6322	0	-0.364812	-3.22041	-414.892	-0.427711		-25.8554	0.0495421	-36.9505	-35.024	-17.5636	-42.3808	-43.9192	-33.9708	-56.5131
0.892825	-23.6373	-1.25797	-80.9632	-37.0977	0	-0.276754	-3.22041	-417.685	-0.201276		-25.8764	0.0484226	-37.0226	-35.057	-17.5636	-42.381	-43.922	-34.3425	-56.5132
0.893716	-23.9644	-1.25797	-79.3153	-37.5505	0	-0.213856	-3.23299	-419.811	-0.163537		-25.8977	0.047303	-37.0932	-35.0904	-17.5636	-42.3812	-43.9249	-34.7161	-56.5134
0.894606	-24.1531	-1.25797	-79.6801	-38.0663	0	-0.113218	-3.23299	-419.157	-0.150957		-25.9192	0.0461834	-37.1641	-35.1243	-17.5636	-42.3813	-43.9278	-35.0892	-56.5135
0.895496	-24.5305	-1.25797	-79.1643	-38.4688	0	-0.025159	-3.45943	-423.723	-0.113218		-25.9411	0.0450638	-37.2346	-35.1585	-17.5636	-42.3813	-43.9309	-35.4663	-56.5136
0.896386	-24.8198	-1.25797	-79.1014	-38.9343	0	0	-3.45943	-421.899	-0.075478		-25.9631	0.0439442	-37.305	-35.1932	-17.5636	-42.3813	-43.9339	-35.8418	-56.5137
0.897276	-24.9959	-1.00638	-79.6298	-39.5004	0	0	-3.67328	-427.611	-0.100638		-25.9854	0.0430485	-37.3758	-35.2283	-17.5636	-42.3813	-43.9372	-36.2224	-56.5138
0.898166	-25.2979	-0.754784	-81.1519	-39.9658	0	0	-3.87456	-427.371	-0.113218		-26.0079	0.0423767	-37.4481	-35.2639	-17.5636	-42.3813	-43.9406	-36.6027	-56.5139
0.899056	-25.5369	-0.50319	-81.0009	-40.3684	0	-0.037739	-4.08842	-431.737	-0.075478		-26.0306	0.0419289	-37.5201	-35.2998	-17.5636	-42.3814	-43.9443	-36.987	-56.5139
0.899947	-25.474	-0.251595	-80.1958	-40.6577	0	-0.037739	-4.06326	-430.328	-0.050319		-26.0533	0.041705	-37.5915	-35.336	-17.5636	-42.3814	-43.9479	-37.37	-56.514
0.900837	-25.3356	0	-79.9065	-40.8464	0	-0.075478	-4.27711	-419.912	-0.062899		-26.0759	0.041705	-37.6626	-35.3724	-17.5636	-42.3815	-43.9517	-37.7437	-56.514
0.901727	-25.4488	0	-78.5102	-41.0729	0	-0.125797	-4.26453	-402.325	-0.062899		-26.0985	0.041705	-37.7325	-35.4089	-17.5636	-42.3816	-43.9555	-38.1017	-56.5141
0.902617	-25.3985	0	-77.7302	-41.3622	0	-0.163537	-4.26453	-379.669	-0.037739		-26.1211	0.041705	-37.8017	-35.4457	-17.5636	-42.3817	-43.9593	-38.4397	-56.5141
0.903507	-25.3859	0	-79.1014	-41.7522	0	-0.125797	-4.26453	-374.449	-0.050319		-26.1437	0.041705	-37.8721	-35.4829	-17.5636	-42.3818	-43.9631	-38.7729	-56.5142
0.904397	-25.5369	0	-80.3971	-41.966	0	-0.125797	-4.27711	-362.284	-0.062899		-26.1664	0.041705	-37.9436	-35.5202	-17.5636	-42.3819	-43.9669	-39.0953	-56.5142
0.905288	-25.9394	0	-80.4726	-42.2931	0	-0.088058	-4.27711	-367.832	-0.075478		-26.1895	0.041705	-38.0153	-35.5579	-17.5636	-42.382	-43.9707	-39.4227	-56.5143
0.906178	-26.0401	0	-82.0451	-42.4818	0	-0.037739	-4.27711	-369.303	-0.062899		-26.2127	0.041705	-38.0883	-35.5957	-17.5636	-42.3821	-43.9745	-39.7514	-56.5144
0.907068	-26.342	0	-83.5546	-42.7711	0	-0.050319	-4.26453	-379.921	-0.062899		-26.2361	0.041705	-38.1626	-35.6338	-17.5636	-42.3821	-43.9783	-40.0895	-56.5144
0.907958	-26.581	0	-83.4037	-43.1988	0	-0.100638	-4.26453	-364.309	-0.050319		-26.2598	0.041705	-38.2369	-35.6722	-17.5636	-42.3822	-43.9821	-40.4138	-56.5145
0.908848	-26.581	0	-84.1207	-43.6769	0	-0.125797	-4.25195	-355.893	-0.037739		-26.2835	0.041705	-38.3117	-35.7111	-17.5636	-42.3823	-43.9859	-40.7305	-56.5145
0.909738	-26.581	0	-85.3032	-44.0417	0	-0.125797	-4.23937	-344.811	-0.01258		-26.3071	0.041705	-38.3877	-35.7503	-17.5636	-42.3824	-43.9897	-41.0374	-56.5145
0.910628	-27.21	0	-84.6365	-44.2933	0	-0.125797	-4.21421	-336.219	0.616407		-26.3313	0.041705	-38.463	-35.7897	-17.5636	-42.3825	-43.9934	-41.3366	-56.514
0.911519	-27.0339	0	-84.5107	-44.3939	0	-0.075478	-4.21421	-324.054	2.67949		-26.3554	0.041705	-38.5382	-35.8292	-17.5636	-42.3826	-43.9972	-41.625	-56.5116
0.912409	-26.8703	-0.251595	-86.1209	-44.1046	0	-0.025159	-4.21421	-315.135	5.01932		-26.3793	0.0414811	-38.6148	-35.8685	-17.5636	-42.3826	-44.0009	-41.9055	-56.5071
0.913299	-27.3358	-0.251595	-86.8128	-44.2304	0	0	-4.21421	-305.323	7.35915		-26.4036	0.0412571	-38.6921	-35.9078	-17.5636	-42.3826	-44.0047	-42.1772	-56.5006
0.914189	-27.3609	-0.50319	-87.1147	-44.4442	0	0	-4.22679	-298.983	9.7493		-26.428	0.0408093	-38.7696	-35.9474	-17.5636	-42.3826	-44.0084	-42.4433	-56.4919
0.915079	-27.3609	-0.754784	-89.4923	-44.5323	0	0	-4.25195	-285.183	11.5482		-26.4523	0.0401375	-38.8493	-35.987	-17.5636	-42.3826	-44.0122	-42.6971	-56.4816
0.915969	-27.6251	-1.00638	-90.8509	-44.5574	0	0	-4.26453	-278.088	11.8879		-26.4769	0.0392419	-38.9302	-36.0267	-17.5636	-42.3826	-44.016	-42.9446	-56.471
0.91686	-27.6125	-1.00638	-91.505	-45.2116	0	0	-4.25195	-269.294	11.9382		-26.5015	0.0383462	-39.0116	-36.0669	-17.5636	-42.3826	-44.0198	-43.1843	-56.4604
0.91775	-27.3861	-1.25797	-90.4357	-45.6645	0	0	-4.27711	-260.275	11.9885		-26.5259	0.0372266	-39.0921	-36.1075	-17.5636	-42.3826	-44.0236	-43.416	-56.4497
0.91864	-27.4993	-1.25797	-92.3604	-45.8657	0	0	-4.27711	-247.469	12.0011		-26.5503	0.036107	-39.1743	-36.1484	-17.5636	-42.3826	-44.0274	-43.6362	-56.439
0.91953	-26.9961	-1.25797	-92.7882	-47.4759	0	-0.01258	-4.27711	-241.141	11.9759		-26.5744	0.0349874	-39.2569	-36.1906	-17.5636	-42.3826	-44.0312	-43.8508	-56.4284
0.92042	-27.0842	-1.50957	-92.612	-48.3188	0	-0.01258	-4.27711	-233.279	11.9382		-26.5985	0.0336439	-39.3393	-36.2336	-17.5636	-42.3826	-44.035	-44.0584	-56.4178
0.92131	-27.3987	-1.76116	-93.3542	-48.6081	0	-0.01258	-4.27711	-225.932	11.8879		-26.6229	0.0320764	-39.4224	-36.2769	-17.5636	-42.3827	-44.0388	-44.2595	-56.4072
0.9222	-27.3987	-2.01276	-96.4614	-49.3629	0	-0.01258	-4.23937	-219.617	11.8501		-26.6472	0.0302851	-39.5082	-36.3208	-17.5636	-42.3827	-44.0426	-44.455	-56.3966
0.923091	-27.3358	-2.26435	-96.2979	-49.7655	0	-0.01258	-4.22679	-213.289	11.7746		-26.6716	0.0282698	-39.5939	-36.3651	-17.5636	-42.3827	-44.0464	-44.6448	-56.3862
0.923981	-27.4993	-2.51595	-97.4678	-48.7591	0	0	-4.21421	-208.132	11.7369		-26.696	0.0260306	-39.6807	-36.4085	-17.5636	-42.3827	-44.0501	-44.83	-56.3757
0.924871	-27.6628	-2.51595	-101.745	-48.9603	0	0	-4.20163	-204.094	11.7495		-26.7207	0.0237914	-39.7712	-36.4521	-17.5636	-42.3827	-44.0539	-45.0117	-56.3653
0.925761	-27.8138	-2.51595	-106.047	-49.539	0	0	-4.21421	-199.678	11.7621		-26.7454	0.0215522	-39.8656	-36.4962	-17.5636	-42.3827	-44.0576	-45.1894	-56.3548
0.926651	-28.0906	-2.76754	-111.658	-49.8032	0	0	-4.22679	-194.508	11.6363		-26.7704	0.0190891	-39.965	-36.5405	-17.5636	-42.3827	-44.0614	-45.3625	-56.3444
0.927541	-28.2667	-2.76754	-118.589	-50.2938	0	0	-4.02552	-190.017	11.5105		-26.7956	0.016626	-40.0705	-36.5853	-17.5636	-42.3827	-44.0649	-45.5316	-56.3342
0.928432	-28.4428	-3.01914	-128.414	-51.5266	0	0	-4.0381	-184.545	11.3721		-26.8209	0.013939	-40.1848	-36.6311	-17.5636	-42.3827	-44.0685	-45.6959	-56.3241
0.929322	-28.468	-3.27073	-136.364	-52.3317	0	0	-4.0381	-182.771	11.1079		-26.8462	0.011028	-40.3062	-36.6777	-17.5636	-42.3827	-44.0721	-45.8585	-56.3142
0.930212	-28.7699	-3.52233	-142.604	-53.3381	0	0	-4.05068	-180.079	10.7054		-26.8718	0.00789315	-40.4331	-36.7252	-17.5636	-42.3827	-44.0757	-46.0188	-56.3046
0.931102	-28.9711	-3.52233	-145.447	-54.6212	0	0	-4.05068	-177.488	10.3909		-26.8976	0.00475828	-40.5625	-36.7738	-17.5636	-42.3827	-44.0793	-46.1768	-56.2954
0.931992	-29.1724	-3.77392	-151.146	-56.4453	0	0	-4.25195	-174.984	10.177		-26.9236	0.00139949	-40.6971	-36.824	-17.5636	-42.3827	-44.0831	-46.3325	-56.2863
0.932882	-29.034	-3.77392	-151.146	-57.9423	0	0	-4.25195	-172.682	9.7493		-26.9494	-0.0019593	-40.8316	-36.8756	-17.5636	-42.3827	-44.0869	-46.4862	-56.2777
0.933772	-29.1724	-3.77392	-152.718	-59.7789	0	0	-4.26453	-168.128	9.44738		-26.9754	-0.0053181	-40.9675	-36.9288	-17.5636	-42.3827	-44.0907	-46.6358	-56.2693
0.934663	-28.8202	-3.77392	-151.812	-61.7036	0	0	-4.25195	-164.669	9.18321		-27.001	-0.00867689	-41.1026	-36.9837	-17.5636	-42.3827	-44.0945	-46.7824	-56.2611
0.935553	-28.468	-3.77392	-154.366	-63.7667	0	0	-4.23937	-161.637	8.76808		-27.0264	-0.0120357	-41.24	-37.0405	-17.5636	-42.3827	-44.0983	-46.9262	-56.2533
0.936443	-28.946	-3.77392	-156.354	-65.7669	0	-0.025159	-4.23937	-157.335	8.20199		-27.0521	-0.0153945	-41.3792	-37.099	-17.5636	-42.3827	-44.102	-47.0663	-56.246
0.937333	-29.4743	-3.77392	-162.065	-67.7293	0	-0.025159	-4.23937	-154.114	7.66106		-27.0784	-0.0187533	-41.5234	-37.1593	-17.5636	-42.3827	-44.1058	-47.2034	-56.2392
0.938223	-29.8391	-3.77392	-168.241	-69.2515	0	-0.025159	-4.21421	-150.24	6.94402		-27.1049	-0.022112	-41.6731	-37.2209	-17.5636	-42.3827	-44.1096	-47.3371	-56.233
0.939113	-30.4933	-3.77392	-178.683	-71.0504	0	-0.025159	-4.18905	-147.535	6.30245		-27.1321	-0.0254708	-41.8322	-37.2841	-17.5636	-42.3828	-44.1133	-47.4685	-56.2274
0.940004	-31.0594	-3.52233	-186.281	-72.2958	0	-0.025159	-4.21421	-145.208	5.7741		-27.1597	-0.0286057	-41.9979	-37.3485	-17.5636	-42.3828	-44.117	-47.5977	-56.2222
0.940894	-30.8078	-3.27073	-189.526	-74.535	0	0	-4.21421	-145.082	5.15769		-27.1871	-0.0315167	-42.1666	-37.4148	-17.5636	-42.3828	-44.1208	-47.7268	-56.2176
0.941784	-30.9084	-3.01914	-197.741	-75.6797	0	0	-4.17647	-143.334	4.49097		-27.2146	-0.0342037	-42.3426	-37.4822	-17.5636	-42.3828	-44.1245	-47.8544	-56.2136
0.942674	-31.16	-2.76754	-203.263	-78.2082	0	0	-4.17647	-142	3.74876		-27.2424	-0.0366668	-42.5235	-37.5518	-17.5636	-42.3828	-44.1282	-47.9808	-56.2103
0.943564	-31.2858	-2.51595	-207.704	-79.114	0	0	-4.18905	-139.396	2.95624		-27.2702	-0.038906	-42.7084	-37.6222	-17.5636	-42.3828	-44.132	-48.1048	-56.2077
0.944454	-31.94	-2.51595	-213.478	-78.7618	0	0	-4.15131	-136.289	2.03792		-27.2986	-0.0411452	-42.8984	-37.6923	-17.5636	-42.3828	-44.1356	-48.2261	-56.2059
0.945344	-31.8142	-2.51595	-223.29	-77.4912	0	0	-4.12615	-132.125	1.23281		-27.327	-0.0433844	-43.0971	-37.7612	-17.5636	-42.3828	-44.1393	-48.3437	-56.2048
0.946235	-31.8016	-2.51595	-228.02	-77.139	0	0	-4.13873	-129.471	0.654146		-27.3553	-0.0456236	-43.3	-37.8299	-17.5636	-42.3828	-44.143	-48.4589	-56.2042
0.947125	-31.7135	-2.51595	-227.668	-75.2646	0	0	-4.12615	-126.275	0.314493		-27.3835	-0.0478628	-43.5027	-37.8969	-17.5636	-42.3828	-44.1467	-48.5713	-56.2039
0.948015	-31.1852	-2.51595	-226.523	-73.8808	0	0	-4.101	-123.684	0.113218		-27.4112	-0.050102	-43.7043	-37.9626	-17.5636	-42.3828	-44.1503	-48.6814	-56.2038
0.948905	-30.3172	-2.51595	-225.114	-73.755	0	0	-4.12615	-122.086	0.088058		-27.4382	-0.0523412	-43.9046	-38.0283	-17.5636	-42.3828	-44.154	-48.7901	-56.2037
0.949795	-30.6694	-2.51595	-218.648	-73.126	0	0	-4.15131	-120.942	0.088058		-27.4655	-0.0545804	-44.0992	-38.0934	-17.5636	-42.3828	-44.1577	-48.8977	-56.2036
0.950685	-30.7575	-2.51595	-217.126	-73.0505	0	0	-4.12615	-119.218	0.088058		-27.4929	-0.0568195	-44.2925	-38.1584	-17.5636	-42.3828	-44.1614	-49.0038	-56.2036
0.951576	-30.6568	-2.51595	-214.648	-73.8053	0	0	-4.12615	-116.727	0.075478		-27.5202	-0.0590587	-44.4835	-38.2241	-17.5636	-42.3828	-44.165	-49.1077	-56.2035
0.952466	-30.6442	-2.26435	-216.912	-75.3401	0	0	-4.11357	-114.086	0.025159		-27.5474	-0.061074	-44.6765	-38.2911	-17.5636	-42.3828	-44.1687	-49.2092	-56.2035
0.953356	-30.3675	-2.01276	-219.906	-76.837	0	0	-4.08842	-110.362	0		-27.5745	-0.0628654	-44.8723	-38.3595	-17.5636	-42.3828	-44.1723	-49.3074	-56.2035
0.954246	-30.1662	-1.76116	-222.523	-78.4347	0	0	-4.06326	-107.079	0		-27.6013	-0.0644328	-45.0703	-38.4293	-17.5636	-42.3828	-44.176	-49.4027	-56.2035
0.955136	-29.8769	-1.50957	-216.208	-79.6801	0	0	-4.07584	-103.946	0		-27.6279	-0.0657763	-45.2627	-38.5002	-17.5636	-42.3828	-44.1796	-49.4953	-56.2035
0.956026	-29.2479	-1.25797	-216.573	-80.4474	0	0	-4.07584	-101.028	0		-27.6539	-0.0668959	-45.4555	-38.5718	-17.5636	-42.3828	-44.1832	-49.5852	-56.2035
0.956917	-28.9711	-1.25797	-211.818	-80.2965	0	0	-4.07584	-98.5497	0		-27.6797	-0.0680155	-45.644	-38.6433	-17.5636	-42.3828	-44.1868	-49.6729	-56.2035
0.957807	-29.2856	-1.25797	-203.326	-79.8939	0	-0.01258	-4.07584	-96.5243	0		-27.7058	-0.0691351	-45.825	-38.7144	-17.5636	-42.3828	-44.1905	-49.7588	-56.2035
0.958697	-29.0592	-1.00638	-194.91	-79.3907	0	-0.01258	-4.07584	-95.2035	0		-27.7317	-0.0700308	-45.9984	-38.7851	-17.5636	-42.3828	-44.1941	-49.8435	-56.2035
0.959587	-28.9208	-0.754784	-190.319	-78.875	0	-0.01258	-4.07584	-93.631	2.26435		-27.7574	-0.0707026	-46.1678	-38.8552	-17.5636	-42.3828	-44.1977	-49.9269	-56.2015
0.960477	-29.4743	-0.50319	-185.526	-79.2901	0	-0.01258	-4.07584	-92.5743	5.79926		-27.7836	-0.0711504	-46.3329	-38.9258	-17.5636	-42.3828	-44.2013	-50.0092	-56.1963
0.961367	-29.7637	-0.251595	-183.023	-79.4285	0	-0.01258	-4.08842	-90.4232	11.3218		-27.8101	-0.0713743	-46.4958	-38.9965	-17.5636	-42.3828	-44.205	-50.0897	-56.1862
0.962257	-29.7259	0	-181.966	-81.7557	0	-0.037739	-4.07584	-88.8381	17.9513		-27.8366	-0.0713743	-46.6578	-39.0693	-17.5636	-42.3829	-44.2086	-50.1688	-56.1703
0.963148	-29.7133	0	-180.746	-83.5043	0	-0.062899	-4.07584	-86.7625	24.6563		-27.863	-0.0713743	-46.8186	-39.1436	-17.5636	-42.3829	-44.2122	-50.246	-56.1483
0.964038	-30.2669	0	-177.563	-84.4352	0	-0.062899	-4.07584	-85.2529	28.7573		-27.89	-0.0713743	-46.9767	-39.2187	-17.5636	-42.383	-44.2159	-50.3219	-56.1227
0.964928	-30.6191	0	-169.374	-86.3725	0	-0.062899	-4.07584	-83.8691	31.2103		-27.9172	-0.0713743	-47.1274	-39.2956	-17.5636	-42.383	-44.2195	-50.3965	-56.0949
0.965818	-31.1097	0	-162.895	-88.8633	0	-0.062899	-4.07584	-83.4414	31.0468		-27.9449	-0.0713743	-47.2724	-39.3747	-17.5636	-42.3831	-44.2231	-50.4708	-56.0673
0.966708	-31.6003	0	-153.334	-90.3728	0	-0.025159	-4.07584	-83.0389	29.6001		-27.973	-0.0713743	-47.4089	-39.4551	-17.5636	-42.3831	-44.2268	-50.5447	-56.041
0.967598	-32.6947	0	-144.415	-90.8383	0	0	-4.06326	-82.0828	27.8641		-28.0021	-0.0713743	-47.5374	-39.536	-17.5636	-42.3831	-44.2304	-50.6177	-56.0162
0.968489	-33.7389	0	-137.949	-93.002	0	0	-4.06326	-80.8248	26.4426		-28.0321	-0.0713743	-47.6602	-39.6187	-17.5636	-42.3831	-44.234	-50.6897	-55.9926
0.969379	-33.5753	0	-135.295	-93.9707	0	0	-4.06326	-80.1455	25.1092		-28.062	-0.0713743	-47.7806	-39.7024	-17.5636	-42.3831	-44.2376	-50.761	-55.9703
0.970269	-34.3301	0	-127.433	-95.1154	0	0	-4.06326	-78.7995	24.2789		-28.0926	-0.0713743	-47.894	-39.787	-17.5636	-42.3831	-44.2412	-50.8311	-55.9487
0.971159	-34.544	0	-122.174	-96.6753	0	0	-4.07584	-78.1705	23.5367		-28.1233	-0.0713743	-48.0027	-39.8731	-17.5636	-42.3831	-44.2448	-50.9007	-55.9277
0.972049	-34.7327	0	-118.275	-98.0717	0	0	-4.08842	-78.1202	22.87		-28.1542	-0.0713743	-48.108	-39.9604	-17.5636	-42.3831	-44.2485	-50.9702	-55.9074
0.972939	-34.6572	-0.251595	-112.79	-98.1974	0	0	-4.07584	-78.2082	22.3794		-28.1851	-0.0715982	-48.2084	-40.0478	-17.5636	-42.3831	-44.2521	-51.0398	-55.8875
0.973829	-35.0094	-0.50319	-105.393	-98.449	0	0	-4.07584	-77.9315	22.2536		-28.2162	-0.0720461	-48.3022	-40.1354	-17.5636	-42.3831	-44.2557	-51.1092	-55.8676
0.97472	-34.7452	-0.754784	-100.688	-102.651	0	0	-3.86198	-77.856	22.3919		-28.2472	-0.0727178	-48.3918	-40.2267	-17.5636	-42.3831	-44.2592	-51.1785	-55.8477
0.97561	-34.6949	-1.00638	-96.6627	-101.619	0	0	-3.8494	-77.0635	22.7316		-28.278	-0.0736135	-48.4778	-40.3172	-17.5636	-42.3831	-44.2626	-51.2471	-55.8275
0.9765	-34.3553	-1.50957	-92.4862	-104.814	0	0	-3.8494	-76.3716	23.4361		-28.3086	-0.074957	-48.5601	-40.4105	-17.5636	-42.3831	-44.266	-51.3151	-55.8066
0.97739	-34.0785	-1.76116	-87.555	-109.305	0	0	-3.8494	-75.8684	24.0525		-28.3389	-0.0765245	-48.6381	-40.5077	-17.5636	-42.3831	-44.2695	-51.3826	-55.7852
0.97828	-34.9968	-2.01276	-85.3661	-113.054	0	0	-3.8494	-75.6546	24.8324		-28.3701	-0.0783158	-48.714	-40.6084	-17.5636	-42.3831	-44.2729	-51.4499	-55.7631
0.97917	-35.8271	-2.26435	-82.0954	-110.186	0	0	-4.06326	-75.6671	25.6752		-28.402	-0.0803311	-48.7871	-40.7064	-17.5636	-42.3831	-44.2765	-51.5173	-55.7403
0.980061	-36.7706	-2.51595	-77.7554	-111.821	0	0	-4.07584	-75.642	26.6565		-28.4347	-0.0825703	-48.8563	-40.8059	-17.5636	-42.3831	-44.2801	-51.5846	-55.7165
0.980951	-37.5379	-2.51595	-75.3149	-111.356	0	0	-4.06326	-75.7678	27.6251		-28.4681	-0.0848095	-48.9233	-40.9051	-17.5636	-42.3831	-44.2837	-51.652	-55.692
0.981841	-38.0286	-2.51595	-71.5536	-110.941	0	0	-4.08842	-75.7804	28.7824		-28.502	-0.0870487	-48.987	-41.0038	-17.5636	-42.3831	-44.2874	-51.7195	-55.6663
0.982731	-38.0789	-2.51595	-67.679	-109.419	0	0	-4.08842	-76.0948	29.9398		-28.5358	-0.0892879	-49.0472	-41.1012	-17.5636	-42.3831	-44.291	-51.7872	-55.6397
0.983621	-37.9531	-2.51595	-63.9931	-110.966	0	0	-4.08842	-75.8181	30.8329		-28.5696	-0.0915271	-49.1042	-41.1999	-17.5636	-42.3831	-44.2947	-51.8547	-55.6123
0.984511	-38.3179	-2.51595	-61.9301	-110.651	0	-0.025159	-4.08842	-76.1452	31.6003		-28.6037	-0.0937662	-49.1593	-41.2984	-17.5636	-42.3831	-44.2983	-51.9224	-55.5841
0.985401	-38.7456	-2.51595	-59.0367	-112.652	0	-0.062899	-4.101	-76.2961	32.1664		-28.6382	-0.0960054	-49.2119	-41.3987	-17.5636	-42.3832	-44.3019	-51.9903	-55.5555
0.986292	-39.0098	-2.51595	-57.1623	-114.84	0	-0.100638	-4.08842	-76.3842	32.7451		-28.6729	-0.0982446	-49.2627	-41.5009	-17.5636	-42.3833	-44.3056	-52.0583	-55.5264
0.987182	-39.1859	-2.26435	-55.1118	-117.394	0	-0.125797	-4.08842	-75.6168	33.0847		-28.7078	-0.10026	-49.3118	-41.6054	-17.5636	-42.3834	-44.3092	-52.1256	-55.4969
0.988072	-40.1545	-2.01276	-53.2249	-121.394	0	-0.125797	-4.07584	-75.4659	33.6256		-28.7435	-0.102051	-49.3592	-41.7134	-17.5636	-42.3835	-44.3128	-52.1928	-55.467
0.988962	-40.2426	-1.76116	-51.3128	-129.634	0	-0.100638	-4.06326	-74.774	34.0408		-28.7794	-0.103619	-49.4048	-41.8288	-17.5636	-42.3836	-44.3165	-52.2593	-55.4367
0.989852	-40.2048	-1.50957	-49.1365	-141.132	0	-0.062899	-4.06326	-74.0318	34.3678		-28.8151	-0.104962	-49.4485	-41.9544	-17.5636	-42.3837	-44.3201	-52.3252	-55.4061
0.990742	-40.7709	-1.25797	-47.6269	-153.938	0	-0.062899	-4.05068	-73.0505	34.5188		-28.8514	-0.106082	-49.4909	-42.0914	-17.5636	-42.3837	-44.3237	-52.3902	-55.3754
0.991633	-42.4944	-1.00638	-45.4632	-176.506	0	-0.062899	-4.0381	-72.258	34.6572		-28.8892	-0.106977	-49.5314	-42.2485	-17.5636	-42.3838	-44.3273	-52.4545	-55.3445
0.992523	-43.3372	-0.754784	-43.2743	-205.515	0	-0.062899	-4.05068	-71.0126	34.7704		-28.9278	-0.107649	-49.5699	-42.4314	-17.5636	-42.3838	-44.3309	-52.5177	-55.3136
0.993413	-44.8594	-0.50319	-41.2741	-237.644	0	-0.062899	-4.06326	-70.2453	34.9968		-28.9677	-0.108097	-49.6066	-42.6429	-17.5636	-42.3839	-44.3345	-52.5803	-55.2824
0.994303	-46.545	-0.251595	-39.3494	-258.954	0	-0.062899	-4.06326	-69.1131	35.4245		-29.0092	-0.108321	-49.6417	-42.8734	-17.5636	-42.3839	-44.3381	-52.6418	-55.2509
0.995193	-47.9036	0	-37.7266	-282.239	0	-0.025159	-4.07584	-68.7986	35.8019		-29.0518	-0.108321	-49.6752	-43.1246	-17.5636	-42.384	-44.3417	-52.703	-55.2191
0.996083	-48.3314	0	-36.0913	-292.492	0	0	-4.08842	-68.3709	36.1039		-29.0948	-0.108321	-49.7074	-43.3849	-17.5636	-42.384	-44.3454	-52.7638	-55.1869
0.996973	-49.4006	0	-34.5565	-294.542	0	0	-4.08842	-68.3206	36.5064		-29.1388	-0.108321	-49.7381	-43.647	-17.5636	-42.384	-44.349	-52.8246	-55.1544
0.997864	-49.2245	0	-33.1979	-288.869	0	0	-4.07584	-68.0061	36.7706		-29.1826	-0.108321	-49.7677	-43.9041	-17.5636	-42.384	-44.3526	-52.8852	-55.1217
0.998754	-49.6145	0	-32.3425	-279.723	0	0	-4.07584	-67.6161	37.0473		-29.2268	-0.108321	-49.7965	-44.1531	-17.5636	-42.384	-44.3563	-52.9454	-55.0887
0.999644	-50.1051	0	-30.5184	-263.13	0	0	-4.07584	-66.572	37.387		-29.2713	-0.108321	-49.8236	-44.3872	-17.5636	-42.384	-44.3599	-53.0046	-55.0555
1.00053	-49.929	0	-28.8328	-246.55	0	0	-4.07584	-66.2072	37.7392		-29.3158	-0.108321	-49.8493	-44.6067	-17.5636	-42.384	-44.3635	-53.0635	-55.0219
1.00142	-50.0548	0	-27.4867	-225.416	0	0	-4.07584	-65.5908	38.0789		-29.3603	-0.108321	-49.8737	-44.8073	-17.5636	-42.384	-44.3672	-53.1219	-54.988
1.00231	-51.2247	0	-26.0023	-206.761	0	0	-4.07584	-65.1253	38.3934		-29.4059	-0.108321	-49.8969	-44.9913	-17.5636	-42.384	-44.3708	-53.1799	-54.9538
1.0032	-53.2249	0	-24.2663	-192.03	0	0	-4.07584	-64.6347	38.6072		-29.4533	-0.108321	-49.9185	-45.1622	-17.5636	-42.384	-44.3744	-53.2374	-54.9194
1.00409	-53.2626	0	-23.5493	-181.589	0	0	-4.07584	-64.207	38.7833		-29.5007	-0.108321	-49.9394	-45.3238	-17.5636	-42.384	-44.378	-53.2945	-54.8849
1.00499	-53.8539	0	-22.8322	-171.764	0	0	-4.07584	-63.4648	39.211		-29.5486	-0.108321	-49.9598	-45.4767	-17.5636	-42.384	-44.3817	-53.351	-54.85
1.00588	-54.0929	0	-22.1403	-163.436	0	0	-4.07584	-62.6848	39.4501		-29.5968	-0.108321	-49.9795	-45.6222	-17.5636	-42.384	-44.3853	-53.4068	-54.8149
1.00676	-55.6402	0	-21.612	-150.831	0	0	-4.08842	-61.7036	39.7771		-29.6463	-0.108321	-49.9987	-45.7564	-17.5636	-42.384	-44.3889	-53.4617	-54.7795
1.00765	-53.9922	0	-21.0711	-141.384	0	0	-4.07584	-60.6595	39.9533		-29.6943	-0.108321	-50.0175	-45.8822	-17.5636	-42.384	-44.3926	-53.5157	-54.744
1.00855	-56.005	0	-20.0773	-131.182	0	0	-3.86198	-60.1312	40.0413		-29.7442	-0.108321	-50.0353	-45.999	-17.5636	-42.384	-44.396	-53.5692	-54.7083
1.00944	-55.4767	0	-19.7879	-120.64	0	0	-3.8494	-59.6405	39.9155		-29.7936	-0.108321	-50.0529	-46.1064	-17.5636	-42.384	-44.3994	-53.6223	-54.6728
1.01033	-54.0803	0	-18.7312	-114.249	0	0	-3.8494	-59.1877	39.7897		-29.8417	-0.108321	-50.0696	-46.208	-17.5636	-42.384	-44.4029	-53.675	-54.6374
1.01122	-52.1179	0	-17.6368	-106.387	0	0	-3.83682	-58.9361	39.4752		-29.8881	-0.108321	-50.0853	-46.3027	-17.5636	-42.384	-44.4063	-53.7274	-54.6023
1.01211	-51.9543	0	-16.1146	-98.0213	0	0	-3.63555	-58.9235	39.2362		-29.9343	-0.108321	-50.0996	-46.39	-17.5636	-42.384	-44.4095	-53.7799	-54.5673
1.013	-50.5957	0	-14.9447	-88.0456	0	0	-3.83682	-58.8983	39.0475		-29.9793	-0.108321	-50.1129	-46.4683	-17.5636	-42.384	-44.4129	-53.8323	-54.5326
1.01389	-53.401	0	-13.1961	-80.2587	0	0	-3.63555	-58.8858	38.9972		-30.0269	-0.108321	-50.1247	-46.5397	-17.5636	-42.384	-44.4162	-53.8847	-54.4979
1.01478	-56.8101	0	-12.0137	-69.3395	0	0	-3.62297	-58.999	38.9343		-30.0774	-0.108321	-50.1354	-46.6015	-17.5636	-42.384	-44.4194	-53.9372	-54.4632
1.01567	-59.8796	0	-10.2776	-61.6533	0	0	-3.63555	-58.8732	39.0727		-30.1307	-0.108321	-50.1445	-46.6563	-17.5636	-42.384	-44.4226	-53.9896	-54.4284
1.01656	-62.1691	0	-8.31521	-53.7658	0	0	-3.83682	-59.0367	39.2236		-30.1861	-0.108321	-50.1519	-46.7042	-17.5636	-42.384	-44.426	-54.0422	-54.3935
1.01745	-64.7353	0	-6.12633	-46.0167	0	0	-3.83682	-59.1625	39.8904		-30.2437	-0.108321	-50.1574	-46.7451	-17.5636	-42.384	-44.4294	-54.0948	-54.358
1.01834	-63.0874	0	-3.88714	-39.1356	0	0	-4.06326	-59.4896	40.6703		-30.2998	-0.108321	-50.1608	-46.78	-17.5636	-42.384	-44.4331	-54.1478	-54.3218
1.01923	-61.4394	0	-1.9247	-33.915	0	0	-3.52233	-59.6154	41.727		-30.3545	-0.108321	-50.1626	-46.8102	-17.5636	-42.384	-44.4362	-54.2008	-54.2847
1.02012	-58.9361	0	-0.817683	-29.5875	0	0	-1.27055	-59.5525	42.8969		-30.407	-0.108321	-50.1633	-46.8365	-17.5636	-42.384	-44.4373	-54.2538	-54.2465
1.02101	-56.9233	0	-0.553509	-26.9332	0	0	1.62279	-59.5147	44.2304		-30.4576	-0.108321	-50.1638	-46.8605	-17.5636	-42.384	-44.4359	-54.3068	-54.2072
1.0219	-54.0174	0	-0.415131	-24.7066	0	0	4.7174	-59.087	44.2807		-30.5057	-0.108321	-50.1641	-46.8824	-17.5636	-42.384	-44.4317	-54.3594	-54.1678
1.02279	-53.7658	0	-0.415131	-23.109	0	0	7.90008	-58.5713	43.2114		-30.5535	-0.108321	-50.1645	-46.903	-17.5636	-42.384	-44.4247	-54.4115	-54.1293
1.02368	-54.2816	0	-0.415131	-22.1026	0	0	10.6425	-58.1561	40.0791		-30.6019	-0.108321	-50.1649	-46.9227	-17.5636	-42.384	-44.4152	-54.4633	-54.0936
1.02457	-54.1055	0	-0.251595	-21.9391	0	0	11.8879	-58.1058	34.393		-30.65	-0.108321	-50.1651	-46.9422	-17.5636	-42.384	-44.4046	-54.515	-54.063
1.02546	-54.5332	0	-0.062899	-22.3794	0	0	12.6301	-57.59	25.1846		-30.6985	-0.108321	-50.1652	-46.9621	-17.5636	-42.384	-44.3934	-54.5662	-54.0406
1.02635	-54.5709	-0.025159	0.50319	-23.0083	0	0	13.4226	-57.3259	14.3032		-30.7471	-0.108343	-50.1647	-46.9826	-17.5636	-42.384	-44.3814	-54.6172	-54.0279
1.02724	-54.1055	-0.289334	2.08824	-23.1719	0	0	14.1522	-56.8227	1.88696		-30.7953	-0.108601	-50.1629	-47.0032	-17.5636	-42.384	-44.3688	-54.6678	-54.0262
1.02813	-53.4387	-0.553509	4.23937	-22.1529	0	0	14.7435	-56.6466	-11.5985		-30.8428	-0.109094	-50.1591	-47.0229	-17.5636	-42.384	-44.3557	-54.7182	-54.0365
1.02902	-53.0362	-0.817683	6.55404	-19.8257	0	0	15.1208	-56.9233	-25.4488		-30.89	-0.109821	-50.1532	-47.0406	-17.5636	-42.384	-44.3422	-54.7689	-54.0592
1.02991	-54.7093	-1.06928	8.96935	-15.0328	0	0	15.2592	-57.2001	-38.6701		-30.9387	-0.110773	-50.1453	-47.054	-17.5636	-42.384	-44.3287	-54.8198	-54.0936
1.0308	-56.4076	-1.54731	10.9695	-10.1267	0	0	15.1334	-57.3007	-51.5015		-30.9889	-0.11215	-50.1355	-47.063	-17.5636	-42.384	-44.3152	-54.8708	-54.1394
1.03169	-57.4014	-1.78632	12.5168	-2.30209	0	0	14.907	-57.4014	-64.6599		-31.04	-0.11374	-50.1244	-47.065	-17.5636	-42.384	-44.3019	-54.9219	-54.197
1.03258	-58.2316	-2.02534	14.039	7.10755	0	0	14.517	-57.3762	-77.4786		-31.0918	-0.115542	-50.1119	-47.0587	-17.5636	-42.384	-44.289	-54.973	-54.2659
1.03347	-60.9237	-2.26435	15.8756	18.228	0	0	14.1145	-56.9862	-90.4357		-31.1461	-0.117558	-50.0977	-47.0425	-17.5636	-42.384	-44.2764	-55.0237	-54.3464
1.03436	-60.4708	-2.51595	17.989	29.185	0	0	13.8629	-56.5082	-103.67		-31.1999	-0.119797	-50.0817	-47.0165	-17.5636	-42.384	-44.2641	-55.074	-54.4387
1.03525	-60.7853	-2.51595	20.4421	41.2364	0	0	13.3974	-56.156	-117.444		-31.254	-0.122036	-50.0635	-46.9798	-17.5636	-42.384	-44.2522	-55.1239	-54.5432
1.03614	-62.1817	-2.51595	22.8196	50.885	0	0	12.9697	-55.9421	-130.968		-31.3093	-0.124275	-50.0432	-46.9345	-17.5636	-42.384	-44.2406	-55.1737	-54.6598
1.03703	-62.6219	-2.51595	24.9582	58.3448	0	0	12.6804	-55.6653	-144.403		-31.365	-0.126514	-50.021	-46.8826	-17.5636	-42.384	-44.2293	-55.2233	-54.7883
1.03792	-61.1375	-2.51595	26.82	63.2132	0	0	12.3533	-55.1118	-157.662		-31.4195	-0.128754	-49.9971	-46.8263	-17.5636	-42.384	-44.2184	-55.2723	-54.9286
1.03881	-61.9175	-2.26435	28.4931	65.9682	0	0	11.9885	-54.898	-168.317		-31.4746	-0.130769	-49.9718	-46.7676	-17.5636	-42.384	-44.2077	-55.3212	-55.0784
1.0397	-60.7727	-2.01276	29.7259	65.1127	0	0	11.7872	-54.5206	-177.727		-31.5287	-0.13256	-49.9453	-46.7097	-17.5636	-42.384	-44.1972	-55.3697	-55.2366
1.04059	-61.4394	-1.76116	30.8329	60.584	0	0	11.7117	-54.6338	-185.815		-31.5833	-0.134128	-49.9179	-46.6557	-17.5636	-42.384	-44.1868	-55.4183	-55.402
1.04148	-65.553	-1.50957	31.7513	54.1935	0	0	11.6866	-54.5835	-192.596		-31.6417	-0.135471	-49.8896	-46.6075	-17.5636	-42.384	-44.1764	-55.4669	-55.5734
1.04237	-69.9182	-1.25797	32.4683	47.1363	0	0	11.7621	-54.3948	-197.175		-31.7039	-0.136591	-49.8607	-46.5656	-17.5636	-42.384	-44.1659	-55.5153	-55.7488
1.04326	-73.2644	-1.25797	33.2986	39.362	0	-0.01258	11.7872	-54.4325	-202.76		-31.7691	-0.13771	-49.8311	-46.5305	-17.5636	-42.384	-44.1554	-55.5638	-55.9293
1.04415	-78.3215	-1.25797	34.1917	32.7702	0	-0.01258	11.8753	-54.9609	-212.723		-31.8388	-0.13883	-49.8007	-46.5014	-17.5636	-42.384	-44.1448	-55.6127	-56.1186
1.04504	-82.5357	-1.25797	34.6949	27.5999	0	-0.01258	11.9256	-54.8854	-221.693		-31.9123	-0.13995	-49.7698	-46.4768	-17.5636	-42.384	-44.1342	-55.6615	-56.3159
1.04593	-84.0578	-1.25797	35.2987	22.9832	0	-0.01258	11.913	-54.8477	-230.775		-31.9871	-0.141069	-49.7384	-46.4563	-17.5636	-42.384	-44.1236	-55.7103	-56.5213
1.04682	-85.1145	-1.25797	36.3177	18.4293	0	-0.01258	11.8501	-55.3005	-237.48		-32.0628	-0.142189	-49.706	-46.4399	-17.5636	-42.384	-44.1131	-55.7596	-56.7327
1.04771	-88.0959	-1.25797	37.8273	13.41	0	0	11.825	-55.5395	-251.469		-32.1412	-0.143308	-49.6724	-46.428	-17.5636	-42.384	-44.1026	-55.809	-56.9565
1.0486	-89.291	-1.25797	40.3432	8.65486	0	0	11.7117	-55.3509	-264.489		-32.2207	-0.144428	-49.6365	-46.4203	-17.5636	-42.384	-44.0921	-55.8583	-57.1919
1.04949	-92.1466	-1.25797	43.4756	5.25833	0	0	11.3847	-54.4577	-276.943		-32.3027	-0.145548	-49.5978	-46.4156	-17.5636	-42.384	-44.082	-55.9067	-57.4384
1.05038	-94.1468	-1.25797	46.1802	2.80528	0	0	10.9947	-53.2626	-290.718		-32.3865	-0.146667	-49.5567	-46.4131	-17.5636	-42.384	-44.0722	-55.9541	-57.6971
1.05127	-100.94	-1.50957	47.7401	0.842843	0	0	10.6802	-51.5392	-306.606		-32.4763	-0.148011	-49.5142	-46.4124	-17.5636	-42.384	-44.0627	-56	-57.97
1.05216	-107.783	-1.76116	48.1301	0	0	0	10.3909	-49.8158	-318.947		-32.5723	-0.149578	-49.4714	-46.4124	-17.5636	-42.384	-44.0535	-56.0443	-58.2538
1.05305	-113.645	-2.01276	46.9979	0	0	0	10.0638	-47.9791	-329.929		-32.6734	-0.15137	-49.4295	-46.4124	-17.5636	-42.384	-44.0445	-56.087	-58.5475
1.05394	-120.061	-2.26435	43.9913	0	0	0	9.88767	-47.6772	-348.157		-32.7803	-0.153385	-49.3904	-46.4124	-17.5636	-42.384	-44.0357	-56.1295	-58.8573
1.05483	-126.804	-2.51595	39.4501	0	0	0	9.58576	-51.0234	-366.762		-32.8931	-0.155624	-49.3553	-46.4124	-17.5636	-42.384	-44.0272	-56.1749	-59.1838
1.05572	-130.729	-2.51595	34.4433	0	0	0	8.83098	-56.8856	-385.468		-33.0095	-0.157863	-49.3246	-46.4124	-17.5636	-42.384	-44.0193	-56.2255	-59.5268
1.05661	-133.999	-2.51595	28.3422	0	0	0	7.7617	-67.7796	-397.834		-33.1287	-0.160102	-49.2994	-46.4124	-17.5636	-42.384	-44.0124	-56.2858	-59.8809
1.0575	-137.585	-2.51595	22.329	0.01258	0	0	6.69242	-85.5674	-401.508		-33.2512	-0.162342	-49.2795	-46.4124	-17.5636	-42.384	-44.0064	-56.362	-60.2382
1.05839	-139.761	-2.51595	17.4733	0.176116	0	0	5.34639	-106.991	-398.916		-33.3756	-0.164581	-49.264	-46.4122	-17.5636	-42.384	-44.0017	-56.4572	-60.5933
1.05928	-146.894	-2.51595	14.3157	0.616407	0	0	3.93746	-131.873	-391.909		-33.5063	-0.16682	-49.2512	-46.4117	-17.5636	-42.384	-43.9982	-56.5746	-60.9421
1.06017	-153.146	-2.26435	12.4791	0.993799	0	0	2.70464	-159.109	-380.21		-33.6426	-0.168835	-49.2401	-46.4108	-17.5636	-42.384	-43.9958	-56.7162	-61.2805
1.06106	-155.762	-2.01276	13.3219	1.39635	0	0	1.77374	-184.507	-368.8		-33.7812	-0.170627	-49.2283	-46.4095	-17.5636	-42.384	-43.9942	-56.8804	-61.6087
1.06195	-155.272	-1.76116	15.5737	1.62279	0	0	0.918321	-206.849	-363.114		-33.9194	-0.172194	-49.2144	-46.4081	-17.5636	-42.384	-43.9934	-57.0645	-61.9319
1.06285	-157.825	-1.25797	19.4231	1.61021	0	0	0.389972	-227.417	-350.283		-34.0599	-0.173314	-49.1971	-46.4067	-17.5636	-42.384	-43.993	-57.2669	-62.2436
1.06374	-160.404	-0.754784	24.5431	1.23281	0	0	0.176116	-242.651	-334.495		-34.2027	-0.173985	-49.1753	-46.4056	-17.5636	-42.384	-43.9929	-57.4828	-62.5413
1.06462	-163.562	-0.50319	30.77	0.855422	0	0	0.213856	-260.237	-325.211		-34.3482	-0.174433	-49.1479	-46.4048	-17.5636	-42.384	-43.9927	-57.7145	-62.8308
1.06551	-168.292	-0.251595	37.2109	0.452871	0	0	0.239015	-275.194	-312.757		-34.498	-0.174657	-49.1148	-46.4044	-17.5636	-42.384	-43.9925	-57.9594	-63.1091
1.06641	-179.651	0	43.4001	0.213856	0	0	0.930901	-293.209	-296.127		-34.6579	-0.174657	-49.0761	-46.4042	-17.5636	-42.384	-43.9916	-58.2203	-63.3727
1.0673	-184.016	0	47.8156	0.062899	0	0	2.55369	-310.72	-283.661		-34.8217	-0.174657	-49.0336	-46.4042	-17.5636	-42.384	-43.9894	-58.4969	-63.6251
1.06819	-181.412	0	49.149	0	0	0	4.7174	-324.545	-274.804		-34.9831	-0.174657	-48.9898	-46.4042	-17.5636	-42.384	-43.9852	-58.7857	-63.8697
1.06908	-178.959	0	47.3627	0	0	0	6.91886	-335.3	-264.665		-35.1424	-0.174657	-48.9477	-46.4042	-17.5636	-42.384	-43.979	-59.0841	-64.1052
1.06997	-175.5	0	43.4253	0	0	0	8.70518	-349.88	-254.501		-35.2986	-0.174657	-48.909	-46.4042	-17.5636	-42.384	-43.9713	-59.3955	-64.3318
1.07086	-173.777	0	38.5946	0	0	0	9.52286	-355.139	-248.626		-35.4533	-0.174657	-48.8747	-46.4042	-17.5636	-42.384	-43.9628	-59.7116	-64.553
1.07175	-170.116	0	33.6382	0	0	0	9.43481	-361.227	-243.443		-35.6047	-0.174657	-48.8448	-46.4042	-17.5636	-42.384	-43.9544	-60.0331	-64.7697
1.07264	-168.719	0	29.4114	0	0	0	8.86872	-379.556	-238.562		-35.7548	-0.174657	-48.8186	-46.4042	-17.5636	-42.384	-43.9465	-60.3709	-64.982
1.07353	-164.468	0	26.342	0	0	0	8.13909	-399.646	-233.769		-35.9012	-0.174657	-48.7951	-46.4042	-17.5636	-42.384	-43.9393	-60.7266	-65.1901
1.07442	-164.153	0	22.8951	0	0	0	7.74912	-407.709	-231.907		-36.0473	-0.174657	-48.7748	-46.4042	-17.5636	-42.384	-43.9324	-61.0894	-65.3965
1.07531	-161.486	0	19.1715	0	0	0	7.73654	-409.584	-227.089		-36.191	-0.174657	-48.7577	-46.4042	-17.5636	-42.384	-43.9255	-61.454	-65.5986
1.0762	-159.964	0	15.775	0	0	-0.01258	7.72396	-421.698	-222.636		-36.3334	-0.174657	-48.7437	-46.4042	-17.5636	-42.384	-43.9186	-61.8293	-65.7967
1.07709	-158.958	0	12.5294	0	0	-0.01258	7.96298	-416.842	-217.843		-36.4749	-0.174657	-48.7325	-46.4042	-17.5636	-42.384	-43.9115	-62.2003	-65.9906
1.07798	-155.473	0	9.17063	0	0	-0.01258	8.79324	-403.005	-210.66		-36.6132	-0.174657	-48.7243	-46.4042	-17.5636	-42.3841	-43.9037	-62.559	-66.1781
1.07887	-153.209	0	6.52888	0	0	-0.01258	11.2966	-406.011	-204.245		-36.7496	-0.174657	-48.7185	-46.4042	-17.5636	-42.3841	-43.8936	-62.9203	-66.3599
1.07976	-149.057	0	4.26453	0	0	-0.01258	15.6492	-410.439	-199.401		-36.8822	-0.174657	-48.7147	-46.4042	-17.5636	-42.3841	-43.8797	-63.2856	-66.5373
1.08065	-146.39	0	1.77374	0	0	0	21.4359	-403.634	-194.571		-37.0125	-0.174657	-48.7132	-46.4042	-17.5636	-42.3841	-43.8606	-63.6448	-66.7105
1.08154	-137.597	0	-0.226435	0	0	0	28.6063	-397.998	-190.822		-37.135	-0.174657	-48.7134	-46.4042	-17.5636	-42.3841	-43.8352	-63.999	-66.8803
1.08243	-137.547	0	-1.71084	0	0	0	36.6951	-389.028	-187.098		-37.2574	-0.174657	-48.7149	-46.4042	-17.5636	-42.3841	-43.8025	-64.3453	-67.0469
1.08332	-131.169	0	-2.80528	0	0	0	44.8719	-370.297	-183.501		-37.3741	-0.174657	-48.7174	-46.4042	-17.5636	-42.3841	-43.7626	-64.6748	-67.2102
1.08421	-122.262	0	-3.88714	0	0	0	51.5644	-358.296	-178.242		-37.483	-0.174657	-48.7208	-46.4042	-17.5636	-42.3841	-43.7167	-64.9937	-67.3688
1.0851	-114.601	0	-4.70482	0	0	0	55.7911	-345.641	-173.751		-37.585	-0.174657	-48.725	-46.4042	-17.5636	-42.3841	-43.667	-65.3013	-67.5234
1.08599	-112.174	0	-5.28349	0	0	0	60.6595	-332.898	-169.826		-37.6848	-0.174657	-48.7297	-46.4042	-17.5636	-42.3841	-43.613	-65.5976	-67.6746
1.08688	-105.255	0	-5.27091	-0.062899	0	0	64.4083	-322.243	-166.581		-37.7785	-0.174657	-48.7344	-46.4042	-17.5636	-42.3841	-43.5557	-65.8844	-67.8228
1.08777	-98.1094	0	-4.49097	-0.138377	0	0	67.3142	-310.015	-163.688		-37.8658	-0.174657	-48.7384	-46.4043	-17.5636	-42.3841	-43.4958	-66.1603	-67.9685
1.08866	-97.6817	0	-3.48459	-0.163537	0	0	69.3269	-289.586	-163.096		-37.9527	-0.174657	-48.7415	-46.4045	-17.5636	-42.3841	-43.4341	-66.4181	-68.1137
1.08955	-98.6252	0	-2.47821	-0.163537	0	0	72.1574	-264.313	-162.681		-38.0405	-0.174657	-48.7437	-46.4046	-17.5636	-42.3841	-43.3699	-66.6533	-68.2585
1.09044	-96.6376	0	-1.22023	-0.163537	0	0	72.3335	-241.141	-160.996		-38.1265	-0.174657	-48.7448	-46.4048	-17.5636	-42.3841	-43.3055	-66.8679	-68.4018
1.09133	-92.1592	0	-0.226435	-0.100638	0	0	71.3649	-220.359	-158.907		-38.2085	-0.174657	-48.745	-46.4049	-17.5636	-42.3841	-43.242	-67.064	-68.5432
1.09222	-88.8255	0	0	-0.025159	0	0	69.1634	-200.081	-156.165		-38.2876	-0.174657	-48.745	-46.4049	-17.5636	-42.3841	-43.1804	-67.2421	-68.6822
1.09311	-81.9696	0	0	0	0	0	66.2449	-186.369	-151.007		-38.3605	-0.174657	-48.745	-46.4049	-17.5636	-42.3841	-43.1215	-67.408	-68.8166
1.094	-73.2896	0	0	0	0	0	64.0183	-172.984	-146.642		-38.4258	-0.174657	-48.745	-46.4049	-17.5636	-42.3841	-43.0645	-67.5619	-68.9471
1.09489	-67.918	0	0	-0.025159	0	0	61.4772	-162.191	-141.988		-38.4862	-0.174657	-48.745	-46.4049	-17.5636	-42.3841	-43.0098	-67.7063	-69.0734
1.09578	-65.3895	0	0	-0.075478	0	0	58.9235	-151.007	-137.497		-38.5444	-0.174657	-48.745	-46.405	-17.5636	-42.3841	-42.9574	-67.8407	-69.1958
1.09667	-62.5842	0	0	-0.100638	0	0	56.4327	-139.132	-132.15		-38.6001	-0.174657	-48.745	-46.4051	-17.5636	-42.3841	-42.9071	-67.9645	-69.3134
1.09756	-60.1563	0	0	-0.100638	0	0	54.6338	-128.364	-130.553		-38.6536	-0.174657	-48.745	-46.4051	-17.5636	-42.3841	-42.8585	-68.0788	-69.4296
1.09845	-58.6845	0	0	-0.138377	0	0	51.8914	-119.445	-128.213		-38.7059	-0.174657	-48.745	-46.4053	-17.5636	-42.3841	-42.8123	-68.1851	-69.5437
1.09934	-56.6088	0	0	-0.113218	0	0	49.3377	-109.846	-124.602		-38.7563	-0.174657	-48.745	-46.4054	-17.5636	-42.3841	-42.7684	-68.2828	-69.6546
1.10023	-53.6652	0	0	-0.088058	0	0	47.0356	-100.261	-122.904		-38.804	-0.174657	-48.745	-46.4055	-17.5636	-42.3841	-42.7265	-68.3721	-69.764
1.10112	-52.1304	0	0	-0.062899	0	0	44.9851	-92.046	-122.011		-38.8504	-0.174657	-48.745	-46.4055	-17.5636	-42.3841	-42.6865	-68.454	-69.8726
1.10201	-50.2183	0	0	-0.088058	0	0	43.2114	-83.6049	-120.451		-38.8951	-0.174657	-48.745	-46.4056	-17.5636	-42.3841	-42.6481	-68.5284	-69.9798
1.1029	-47.715	0	0	-0.088058	0	0	41.727	-75.491	-117.017		-38.9376	-0.174657	-48.745	-46.4057	-17.5636	-42.3841	-42.6109	-68.5956	-70.084
1.10379	-45.2745	0	0	-0.138377	0	0	40.1923	-69.1257	-115.067		-38.9779	-0.174657	-48.745	-46.4058	-17.5636	-42.3841	-42.5751	-68.6571	-70.1864
1.10468	-43.8404	0	0	-0.251595	0	0	38.8462	-65.465	-111.96		-39.0169	-0.174657	-48.745	-46.406	-17.5636	-42.3841	-42.5406	-68.7154	-70.286
1.10557	-42.0918	0	0	-0.339653	0	0	37.7644	-62.2068	-108.098		-39.0543	-0.174657	-48.745	-46.4063	-17.5636	-42.3841	-42.507	-68.7707	-70.3822
1.10646	-40.6829	0	0	-0.377392	0	0	36.7454	-59.9299	-104.764		-39.0906	-0.174657	-48.745	-46.4067	-17.5636	-42.3841	-42.4743	-68.8241	-70.4755
1.10735	-39.752	0	0	-0.47803	0	0	35.8019	-58.1436	-103.506		-39.1259	-0.174657	-48.745	-46.4071	-17.5636	-42.3841	-42.4424	-68.8758	-70.5676
1.10824	-38.5192	0	0	-0.50319	0	0	35.1855	-56.0805	-102.764		-39.1602	-0.174657	-48.745	-46.4075	-17.5636	-42.3841	-42.4111	-68.9257	-70.659
1.10913	-36.758	0	-0.025159	-0.427711	0	0	34.9717	-53.791	-100.94		-39.1929	-0.174657	-48.745	-46.4079	-17.5636	-42.3841	-42.38	-68.9736	-70.7489
1.11002	-35.8774	0	-0.062899	-0.377392	0	0	34.5188	-51.5769	-100.034		-39.2249	-0.174657	-48.7451	-46.4082	-17.5636	-42.3841	-42.3492	-69.0195	-70.8379
1.11091	-34.8585	0	-0.088058	-0.314493	0	0	34.0282	-49.2371	-98.6377		-39.2559	-0.174657	-48.7452	-46.4085	-17.5636	-42.3841	-42.3189	-69.0633	-70.9257
1.1118	-33.2986	0	-0.088058	-0.226435	0	0	33.5376	-47.2118	-96.5998		-39.2855	-0.174657	-48.7452	-46.4087	-17.5636	-42.3841	-42.2891	-69.1053	-71.0117
1.11269	-32.1035	0	-0.113218	-0.239015	0	0	32.9715	-45.4758	-94.3858		-39.3141	-0.174657	-48.7453	-46.4089	-17.5636	-42.3841	-42.2598	-69.1458	-71.0957
1.11358	-31.311	0	-0.100638	-0.276754	0	0	32.3048	-43.9788	-92.7253		-39.342	-0.174657	-48.7454	-46.4092	-17.5636	-42.3841	-42.231	-69.1849	-71.1782
1.11447	-30.1536	0	-0.088058	-0.314493	0	0	31.311	-42.5195	-91.6686		-39.3688	-0.174657	-48.7455	-46.4095	-17.5636	-42.3841	-42.2031	-69.2228	-71.2598
1.11536	-29.0592	0	-0.088058	-0.352233	0	0	30.3549	-41.3999	-90.4861		-39.3947	-0.174657	-48.7456	-46.4098	-17.5636	-42.3841	-42.1761	-69.2596	-71.3403
1.11625	-27.8893	0	-0.100638	-0.301914	0	0	29.1473	-39.9784	-89.7816		-39.4195	-0.174657	-48.7457	-46.41	-17.5636	-42.3841	-42.1502	-69.2952	-71.4202
1.11714	-27.1722	0	-0.528349	-0.213856	0	0	28.0277	-38.255	-88.4607		-39.4437	-0.174657	-48.7461	-46.4102	-17.5636	-42.3841	-42.1252	-69.3293	-71.4989
1.11803	-26.3168	0	-1.44667	-0.150957	0	0	26.6313	-36.3051	-87.404		-39.4671	-0.174657	-48.7474	-46.4104	-17.5636	-42.3841	-42.1015	-69.3616	-71.5767
1.11892	-25.3859	0	-2.16371	-0.201276	0	0	25.5872	-34.3175	-85.5171		-39.4897	-0.174657	-48.7494	-46.4105	-17.5636	-42.3841	-42.0788	-69.3921	-71.6528
1.11982	-24.5557	0	-3.14493	-0.264175	0	0	24.7318	-32.1538	-82.4854		-39.5115	-0.174657	-48.7522	-46.4108	-17.5636	-42.3841	-42.0567	-69.4207	-71.7263
1.12071	-23.7128	0	-4.16389	-0.276754	0	0	24.1028	-30.1662	-79.6046		-39.5326	-0.174657	-48.7559	-46.411	-17.5636	-42.3841	-42.0353	-69.4476	-71.7971
1.12159	-22.6687	0	-4.969	-0.276754	0	0	23.5367	-28.3547	-77.5289		-39.5528	-0.174657	-48.7603	-46.4113	-17.5636	-42.3841	-42.0143	-69.4728	-71.8661
1.12248	-21.612	0	-5.04448	-0.239015	0	0	23.197	-26.3671	-76.4597		-39.572	-0.174657	-48.7648	-46.4115	-17.5636	-42.3841	-41.9937	-69.4963	-71.9342
1.12338	-20.6559	0	-5.29607	-0.113218	0	0	22.8448	-24.4676	-77.617		-39.5904	-0.174657	-48.7695	-46.4116	-17.5636	-42.3841	-41.9734	-69.5181	-72.0032
1.12427	-19.6496	0	-5.29607	-0.01258	0	0	22.3794	-22.9706	-82.7244		-39.6079	-0.174657	-48.7742	-46.4116	-17.5636	-42.3841	-41.9535	-69.5385	-72.0769
1.12516	-19.0583	0	-5.04448	0	0	0	21.7001	-21.5868	-92.1969		-39.6249	-0.174657	-48.7787	-46.4116	-17.5636	-42.3841	-41.9341	-69.5577	-72.1589
1.12605	-18.3287	0	-4.54129	0	0	0	20.9201	-20.4421	-106.173		-39.6412	-0.174657	-48.7827	-46.4116	-17.5636	-42.3841	-41.9155	-69.5759	-72.2534
1.12694	-17.7123	0	-4.28969	0	0	0	20.1779	-19.3225	-123.193		-39.657	-0.174657	-48.7866	-46.4116	-17.5636	-42.3841	-41.8976	-69.5931	-72.363
1.12783	-17.1713	0	-3.79908	-0.037739	0	0	19.1212	-18.1777	-143.044		-39.6722	-0.174657	-48.7899	-46.4116	-17.5636	-42.3841	-41.8805	-69.6093	-72.4904
1.12872	-16.8694	0	-2.7927	-0.088058	0	0	18.0016	-17.1965	-163.033		-39.6873	-0.174657	-48.7924	-46.4117	-17.5636	-42.3841	-41.8645	-69.6246	-72.6355
1.12961	-16.9072	0	-2.01276	-0.088058	0	0	16.8317	-15.7373	-181.111		-39.7023	-0.174657	-48.7942	-46.4118	-17.5636	-42.3841	-41.8495	-69.6386	-72.7966
1.1305	-16.643	0	-1.25797	-0.201276	0	0	15.5611	-14.6931	-198.471		-39.7171	-0.174657	-48.7953	-46.412	-17.5636	-42.3841	-41.8357	-69.6517	-72.9733
1.13139	-16.1021	0	-0.553509	-0.301914	0	0	14.3661	-13.7497	-217.629		-39.7314	-0.174657	-48.7958	-46.4122	-17.5636	-42.3841	-41.8229	-69.6639	-73.167
1.13228	-15.1712	0	-0.113218	-0.314493	0	0	13.3597	-13.1961	-234.323		-39.7449	-0.174657	-48.7959	-46.4125	-17.5636	-42.3841	-41.811	-69.6757	-73.3755
1.13317	-14.1648	0	-0.125797	-0.264175	0	0	12.5043	-12.4414	-247.293		-39.7576	-0.174657	-48.796	-46.4128	-17.5636	-42.3841	-41.7999	-69.6867	-73.5956
1.13406	-12.693	0	-0.163537	-0.327073	0	0	12.0137	-12.2652	-261.784		-39.7689	-0.174657	-48.7962	-46.413	-17.5636	-42.3841	-41.7892	-69.6976	-73.8286
1.13495	-11.7495	0	-0.276754	-0.251595	0	0	11.7998	-11.825	-275.22		-39.7793	-0.174657	-48.7964	-46.4133	-17.5636	-42.3841	-41.7787	-69.7082	-74.0735
1.13584	-11.2337	0	-0.364812	-0.150957	0	0	11.6111	-11.6614	-289.485		-39.7893	-0.174657	-48.7968	-46.4134	-17.5636	-42.3841	-41.7684	-69.7185	-74.3312
1.13673	-11.0576	0	-0.364812	-0.100638	0	0	11.5734	-11.4853	-301.901		-39.7991	-0.174657	-48.7971	-46.4135	-17.5636	-42.3841	-41.7581	-69.7288	-74.5999
1.13762	-10.8815	0	-0.352233	-0.113218	0	0	11.5608	-11.1456	-314.355		-39.8088	-0.174657	-48.7974	-46.4136	-17.5636	-42.3841	-41.7478	-69.7387	-74.8797
1.13851	-11.0576	0	-0.314493	-0.050319	0	0	11.4853	-10.957	-322.771		-39.8187	-0.174657	-48.7977	-46.4136	-17.5636	-42.3841	-41.7376	-69.7484	-75.1669
1.1394	-11.4224	-0.251595	-0.213856	-0.01258	0	0	11.4979	-10.806	-329.463		-39.8288	-0.174881	-48.7979	-46.4136	-17.5636	-42.3841	-41.7273	-69.7581	-75.4601
1.14029	-11.7872	-0.50319	-0.125797	-0.01258	0	0	11.5859	-10.6676	-329.099		-39.8393	-0.175329	-48.798	-46.4137	-17.5636	-42.3841	-41.717	-69.7676	-75.753
1.14118	-12.1269	-0.754784	-0.100638	-0.01258	0	0	11.5734	-10.416	-334.017		-39.8501	-0.176001	-48.7981	-46.4137	-17.5636	-42.3841	-41.7067	-69.7768	-76.0503
1.14207	-12.3659	-1.25797	-0.138377	0	0	0	11.5356	-10.2525	-336.684		-39.8611	-0.17712	-48.7982	-46.4137	-17.5636	-42.3841	-41.6964	-69.7859	-76.35
1.14296	-12.6426	-1.50957	-0.188696	0	0	0	11.3721	-10.1015	-350.006		-39.8724	-0.178464	-48.7984	-46.4137	-17.5636	-42.3841	-41.6863	-69.7949	-76.6615
1.14385	-12.4917	-1.50957	-0.176116	-0.037739	0	0	11.0576	-9.98831	-357.604		-39.8835	-0.179807	-48.7985	-46.4137	-17.5636	-42.3841	-41.6765	-69.8038	-76.9797
1.14474	-12.1394	-1.50957	-0.125797	-0.050319	0	0	10.5921	-9.78704	-373.53		-39.8943	-0.181151	-48.7986	-46.4137	-17.5636	-42.3841	-41.667	-69.8125	-77.3122
1.14563	-11.7117	-1.76116	-0.100638	-0.062899	0	0	10.3028	-9.66124	-386.525		-39.9047	-0.182718	-48.7987	-46.4138	-17.5636	-42.3841	-41.6579	-69.8211	-77.6562
1.14652	-11.3595	-1.76116	-0.125797	-0.088058	0	0	9.90025	-9.69898	-392.048		-39.9148	-0.184286	-48.7988	-46.4139	-17.5636	-42.3841	-41.6491	-69.8298	-78.0051
1.14741	-10.6676	-2.01276	-0.088058	-0.150957	0	0	9.71156	-9.69898	-388.752		-39.9243	-0.186077	-48.7989	-46.414	-17.5636	-42.3841	-41.6404	-69.8384	-78.3511
1.1483	-10.2147	-2.26435	-0.088058	-0.113218	0	0	9.48512	-9.45996	-385.494		-39.9334	-0.188092	-48.799	-46.4141	-17.5636	-42.3841	-41.632	-69.8468	-78.6942
1.14919	-9.77446	-2.51595	-0.150957	-0.100638	0	0	9.35933	-9.23353	-371.97		-39.9421	-0.190331	-48.7991	-46.4142	-17.5636	-42.3841	-41.6237	-69.855	-79.0252
1.15008	-9.17063	-2.51595	-0.138377	-0.088058	0	0	9.15805	-9.00709	-339.615		-39.9503	-0.192571	-48.7992	-46.4143	-17.5636	-42.3841	-41.6155	-69.8631	-79.3275
1.15097	-8.70518	-2.51595	-0.075478	-0.088058	0	0	8.8184	-8.79324	-312.783		-39.958	-0.19481	-48.7993	-46.4144	-17.5636	-42.3841	-41.6077	-69.8709	-79.6059
1.15186	-8.02587	-2.51595	-0.062899	-0.075478	0	0	8.31521	-8.5039	-279.082		-39.9652	-0.197049	-48.7994	-46.4144	-17.5636	-42.3841	-41.6003	-69.8784	-79.8543
1.15275	-7.03207	-2.51595	-0.062899	-0.150957	0	0	7.72396	-8.21457	-247.104		-39.9714	-0.199288	-48.7994	-46.4146	-17.5636	-42.3841	-41.5934	-69.8858	-80.0742
1.15364	-6.16407	-2.51595	-0.01258	-0.239015	0	0	7.05723	-8.02587	-217.315		-39.9769	-0.201527	-48.7994	-46.4148	-17.5636	-42.3841	-41.5871	-69.8929	-80.2676
1.15453	-5.6483	-2.54111	-0.075478	-0.301914	0	0	6.16407	-7.83718	-203.175		-39.9819	-0.203789	-48.7995	-46.415	-17.5636	-42.3841	-41.5816	-69.8999	-80.4484
1.15542	-5.05706	-2.55369	-0.163537	-0.276754	0	0	5.6483	-7.38431	-190.885		-39.9864	-0.206062	-48.7996	-46.4153	-17.5636	-42.3841	-41.5766	-69.9065	-80.6183
1.15631	-4.74256	-2.55369	-0.239015	-0.226435	0	0	5.08221	-7.17045	-181.387		-39.9907	-0.208335	-48.7999	-46.4155	-17.5636	-42.3841	-41.5721	-69.9128	-80.7797
1.1572	-4.7174	-2.55369	-0.289334	-0.201276	0	0	4.83062	-7.08239	-169.613		-39.9949	-0.210607	-48.8001	-46.4157	-17.5636	-42.3841	-41.5678	-69.9191	-80.9307
1.15809	-5.00674	-2.55369	-0.301914	-0.188696	0	0	4.28969	-7.20819	-157.498		-39.9993	-0.21288	-48.8004	-46.4158	-17.5636	-42.3841	-41.5639	-69.9256	-81.0709
1.15898	-5.08221	-2.78012	-0.239015	-0.176116	0	0	3.67328	-7.40947	-144.189		-40.0038	-0.215354	-48.8006	-46.416	-17.5636	-42.3841	-41.5607	-69.9321	-81.1992
1.15987	-4.89352	-3.01914	-0.276754	-0.264175	0	0	3.03172	-7.64848	-132.528		-40.0082	-0.218041	-48.8008	-46.4162	-17.5636	-42.3841	-41.558	-69.939	-81.3171
1.16076	-4.56644	-3.27073	-0.352233	-0.314493	0	0	2.32725	-7.8875	-120.677		-40.0123	-0.220952	-48.8012	-46.4165	-17.5636	-42.3841	-41.5559	-69.946	-81.4245
1.16165	-4.36517	-3.52233	-0.49061	-0.301914	0	0	1.44667	-8.08877	-113.268		-40.0161	-0.224087	-48.8016	-46.4168	-17.5636	-42.3841	-41.5546	-69.9532	-81.5254
1.16254	-3.83682	-3.76134	-0.603827	-0.226435	0	0	0.918321	-8.05103	-104.211		-40.0196	-0.227435	-48.8021	-46.417	-17.5636	-42.3841	-41.5538	-69.9603	-81.6181
1.16343	-3.44685	-3.48459	-0.628987	-0.176116	0	0	0.654146	-8.06361	-96.5747		-40.0226	-0.230536	-48.8027	-46.4171	-17.5636	-42.3841	-41.5532	-69.9675	-81.7041
1.16432	-3.01914	-3.20783	-0.50319	-0.088058	0	0	0.352233	-8.03845	-88.0204		-40.0253	-0.233391	-48.8031	-46.4172	-17.5636	-42.3841	-41.5529	-69.9747	-81.7824
1.16521	-2.62917	-2.90592	-0.352233	-0.050319	0	0	0.226435	-7.8875	-81.6928		-40.0277	-0.235977	-48.8034	-46.4173	-17.5636	-42.3841	-41.5527	-69.9817	-81.8551
1.1661	-2.20145	-2.60401	-0.163537	-0.062899	0	0	0.226435	-7.83718	-75.642		-40.0296	-0.238295	-48.8036	-46.4173	-17.5636	-42.3841	-41.5525	-69.9887	-81.9224
1.16699	-1.87438	-2.31467	-0.025159	-0.100638	0	0	0.339653	-7.83718	-71.9058		-40.0313	-0.240355	-48.8036	-46.4174	-17.5636	-42.3841	-41.5522	-69.9956	-81.9864
1.16788	-1.49699	-2.28951	0	-0.100638	0	0	0.314493	-7.78686	-68.4212		-40.0326	-0.242393	-48.8036	-46.4175	-17.5636	-42.3841	-41.5519	-70.0026	-82.0473
1.16877	-1.38377	-1.81148	-0.075478	-0.100638	0	0	0.276754	-7.87492	-66.1317		-40.0338	-0.244005	-48.8037	-46.4176	-17.5636	-42.3841	-41.5517	-70.0096	-82.1062
1.16966	-1.34603	-1.35861	-0.100638	-0.088058	0	0	0.352233	-7.83718	-64.2573		-40.035	-0.245214	-48.8038	-46.4177	-17.5636	-42.3841	-41.5514	-70.0166	-82.1634
1.17055	-1.33345	-0.905741	-0.125797	-0.037739	0	0	0.440291	-8.01329	-62.5465		-40.0362	-0.24602	-48.8039	-46.4177	-17.5636	-42.3841	-41.551	-70.0237	-82.219
1.17144	-1.27055	-0.452871	-0.125797	0	0	0	0.339653	-7.9504	-60.2318		-40.0374	-0.246423	-48.804	-46.4177	-17.5636	-42.3841	-41.5507	-70.0308	-82.2726
1.17233	-1.27055	0	-0.125797	0	0	0	0.402552	-7.74912	-57.59		-40.0385	-0.246423	-48.8041	-46.4177	-17.5636	-42.3841	-41.5503	-70.0377	-82.3239
1.17322	-1.32087	0	-0.050319	0	0	0	0.402552	-7.6359	-54.9609		-40.0397	-0.246423	-48.8042	-46.4177	-17.5636	-42.3841	-41.55	-70.0445	-82.3728
1.17411	-1.35861	0	-0.100638	-0.037739	0	0	0.327073	-7.73654	-51.6398		-40.0409	-0.246423	-48.8042	-46.4177	-17.5636	-42.3841	-41.5497	-70.0513	-82.4188
1.175	-1.64795	0	-0.201276	-0.050319	0	0	0.163537	-7.56042	-48.1301		-40.0423	-0.246423	-48.8044	-46.4178	-17.5636	-42.3841	-41.5495	-70.0581	-82.4616
1.17589	-1.9247	0	-0.276754	-0.088058	0	0	0.088058	-7.66106	-45.0103		-40.0441	-0.246423	-48.8047	-46.4179	-17.5636	-42.3841	-41.5494	-70.0649	-82.5017
1.17678	-2.16371	0	-0.276754	-0.125797	0	0	0.025159	-7.97555	-41.8402		-40.046	-0.246423	-48.8049	-46.418	-17.5636	-42.3841	-41.5494	-70.072	-82.5389
1.17768	-2.36499	0	-0.276754	-0.125797	0	-0.037739	0	-8.18941	-38.733		-40.0481	-0.246423	-48.8052	-46.4181	-17.5636	-42.3841	-41.5494	-70.0793	-82.5734
1.17857	-2.57885	0	-0.201276	-0.088058	0	-0.075478	0	-8.35295	-35.1352		-40.0504	-0.246423	-48.8053	-46.4182	-17.5636	-42.3842	-41.5494	-70.0867	-82.6046
1.17945	-2.55369	0	-0.075478	-0.075478	0	-0.075478	0	-8.52906	-31.3864		-40.0527	-0.246423	-48.8054	-46.4182	-17.5636	-42.3842	-41.5494	-70.0943	-82.6326
1.18034	-2.55369	0	-0.062899	-0.037739	0	-0.075478	0	-8.51648	-26.5433		-40.0549	-0.246423	-48.8055	-46.4183	-17.5636	-42.3843	-41.5494	-70.1019	-82.6562
1.18124	-2.56627	0	-0.163537	0	0	-0.075478	0.01258	-8.41585	-21.7378		-40.0572	-0.246423	-48.8056	-46.4183	-17.5636	-42.3844	-41.5494	-70.1094	-82.6755
1.18213	-2.56627	0	-0.163537	0	0	-0.075478	0.025159	-8.42843	-17.5865		-40.0595	-0.246423	-48.8058	-46.4183	-17.5636	-42.3844	-41.5494	-70.1169	-82.6912
1.18302	-2.81786	0	-0.163537	0	0	-0.389972	0.025159	-8.30263	-14.6428		-40.062	-0.246423	-48.8059	-46.4183	-17.5636	-42.3848	-41.5494	-70.1243	-82.7042
1.18391	-3.29589	0	-0.163537	0	0	-1.33345	0.062899	-8.22715	-12.4665		-40.0649	-0.246423	-48.806	-46.4183	-17.5636	-42.386	-41.5493	-70.1316	-82.7153
1.1848	-3.82424	0	-0.100638	0	0	-2.7927	0.113218	-8.21457	-11.8375		-40.0683	-0.246423	-48.8061	-46.4183	-17.5636	-42.3885	-41.5492	-70.1389	-82.7259
1.18569	-4.12615	0	-0.025159	0	0	-4.62934	0.150957	-8.20199	-11.7998		-40.072	-0.246423	-48.8062	-46.4183	-17.5636	-42.3926	-41.5491	-70.1462	-82.7364
1.18658	-4.62934	0	-0.050319	-0.01258	0	-6.5792	0.163537	-8.06361	-11.8753		-40.0761	-0.246423	-48.8062	-46.4183	-17.5636	-42.3984	-41.5489	-70.1534	-82.7469
1.18747	-4.89352	0	-0.050319	-0.01258	0	-8.29005	0.163537	-8.06361	-11.9004		-40.0805	-0.246423	-48.8062	-46.4183	-17.5636	-42.4058	-41.5488	-70.1605	-82.7575
1.18836	-4.89352	0	-0.050319	-0.01258	0	-9.47254	0.125797	-7.90008	-11.913		-40.0848	-0.246423	-48.8063	-46.4183	-17.5636	-42.4142	-41.5487	-70.1676	-82.7681
1.18925	-4.8432	0	-0.050319	-0.01258	0	-10.2022	0.075478	-7.86234	-11.9508		-40.0892	-0.246423	-48.8063	-46.4183	-17.5636	-42.4233	-41.5486	-70.1746	-82.7788
1.19014	-4.79288	0	-0.025159	-0.01258	0	-10.5544	0.025159	-7.74912	-12.0137		-40.0934	-0.246423	-48.8064	-46.4183	-17.5636	-42.4327	-41.5486	-70.1815	-82.7894
1.19103	-4.54129	0	-0.075478	0	0	-10.9318	0	-7.79944	-12.0514		-40.0975	-0.246423	-48.8064	-46.4183	-17.5636	-42.4424	-41.5486	-70.1884	-82.8002
1.19192	-4.27711	0	-0.113218	0	0	-11.2211	0	-7.78686	-12.3281		-40.1013	-0.246423	-48.8065	-46.4183	-17.5636	-42.4524	-41.5486	-70.1953	-82.8111
1.19281	-4.02552	0	-0.113218	0	0	-11.4224	0	-7.54784	-12.8313		-40.1049	-0.246423	-48.8066	-46.4183	-17.5636	-42.4626	-41.5486	-70.2021	-82.8226
1.1937	-3.52233	0	-0.113218	0	0	-11.5608	0	-7.29625	-13.6993		-40.108	-0.246423	-48.8067	-46.4183	-17.5636	-42.4729	-41.5486	-70.2086	-82.8348
1.19459	-3.27073	0	-0.113218	-0.062899	0	-11.7117	0	-7.05723	-14.7812		-40.1109	-0.246423	-48.8068	-46.4184	-17.5636	-42.4833	-41.5486	-70.2148	-82.8479
1.19548	-2.80528	0	-0.037739	-0.113218	0	-11.674	0	-6.74274	-16.2027		-40.1134	-0.246423	-48.8069	-46.4185	-17.5636	-42.4937	-41.5486	-70.2208	-82.8623
1.19637	-2.32725	0	-0.037739	-0.150957	0	-11.6237	0	-6.56662	-17.2971		-40.1155	-0.246423	-48.8069	-46.4186	-17.5636	-42.504	-41.5486	-70.2267	-82.8777
1.19726	-1.82406	0	-0.037739	-0.176116	0	-11.4098	0	-6.74274	-17.8507		-40.1171	-0.246423	-48.8069	-46.4188	-17.5636	-42.5142	-41.5486	-70.2327	-82.8936
1.19815	-1.57247	0	-0.138377	-0.176116	0	-11.196	0	-6.90628	-17.989		-40.1185	-0.246423	-48.8071	-46.4189	-17.5636	-42.5242	-41.5486	-70.2388	-82.9096
1.19904	-1.06928	0	-0.239015	-0.113218	0	-10.7179	0	-7.08239	-17.7752		-40.1194	-0.246423	-48.8073	-46.419	-17.5636	-42.5337	-41.5486	-70.2451	-82.9254
1.19993	-1.0567	0	-0.301914	-0.062899	0	-9.64866	0	-7.25851	-17.0455		-40.1204	-0.246423	-48.8075	-46.4191	-17.5636	-42.5423	-41.5486	-70.2516	-82.9406
1.20082	-0.792524	0	-0.264175	-0.025159	0	-8.02587	0	-7.27109	-16.165		-40.1211	-0.246423	-48.8078	-46.4191	-17.5636	-42.5494	-41.5486	-70.2581	-82.955
1.20171	-0.792524	0	-0.264175	0	0	-6.11375	0	-7.20819	-15.1586		-40.1218	-0.246423	-48.808	-46.4191	-17.5636	-42.5549	-41.5486	-70.2645	-82.9685
1.2026	-0.779944	0	-0.163537	0	0	-4.00036	0	-7.33399	-14.2025		-40.1225	-0.246423	-48.8082	-46.4191	-17.5636	-42.5584	-41.5486	-70.271	-82.9811
1.20349	-1.28313	0	-0.062899	0	0	-2.13856	0	-7.19561	-13.3094		-40.1236	-0.246423	-48.8082	-46.4191	-17.5636	-42.5603	-41.5486	-70.2774	-82.993
1.20438	-1.55989	0	0	0	0	-0.880582	0	-7.08239	-12.5797		-40.125	-0.246423	-48.8082	-46.4191	-17.5636	-42.5611	-41.5486	-70.2837	-83.0042
1.20527	-2.0505	0	0	0	0	-0.201276	0	-7.0195	-12.0514		-40.1268	-0.246423	-48.8082	-46.4191	-17.5636	-42.5613	-41.5486	-70.29	-83.0149
1.20616	-2.30209	0	0	0	0	0	0	-7.03207	-11.9633		-40.1289	-0.246423	-48.8082	-46.4191	-17.5636	-42.5613	-41.5486	-70.2962	-83.0255
1.20705	-2.56627	0	-0.01258	0	0	0.314493	0	-6.8937	-11.8627		-40.1312	-0.246423	-48.8082	-46.4191	-17.5636	-42.561	-41.5486	-70.3024	-83.0361
1.20794	-2.56627	0	-0.113218	0	0	1.30829	0	-7.08239	-11.8124		-40.1335	-0.246423	-48.8083	-46.4191	-17.5636	-42.5599	-41.5486	-70.3087	-83.0466
1.20883	-2.51595	0	-0.264175	0	0	2.44047	0	-7.09497	-11.7872		-40.1357	-0.246423	-48.8086	-46.4191	-17.5636	-42.5577	-41.5486	-70.315	-83.0571
1.20972	-2.51595	0	-0.339653	0	0	3.83682	0	-7.03207	-11.7369		-40.1379	-0.246423	-48.8089	-46.4191	-17.5636	-42.5543	-41.5486	-70.3212	-83.0676
1.21061	-2.30209	0	-0.339653	0	0	5.23317	0	-6.94402	-11.6866		-40.14	-0.246423	-48.8092	-46.4191	-17.5636	-42.5496	-41.5486	-70.3274	-83.078
1.2115	-2.07566	-0.264175	-0.327073	0	0	5.91248	0	-6.8308	-11.6866		-40.1418	-0.246658	-48.8095	-46.4191	-17.5636	-42.5444	-41.5486	-70.3335	-83.0884
1.21239	-1.82406	-0.528349	-0.239015	0	0	5.6483	0	-6.65468	-11.6992		-40.1435	-0.247129	-48.8097	-46.4191	-17.5636	-42.5393	-41.5486	-70.3394	-83.0988
1.21328	-1.57247	-0.566088	-0.100638	0	0	4.91868	0	-6.65468	-11.674		-40.1449	-0.247632	-48.8098	-46.4191	-17.5636	-42.5349	-41.5486	-70.3453	-83.1092
1.21417	-1.32087	-0.842843	-0.025159	0	0	3.71102	0	-6.35277	-11.6992		-40.146	-0.248383	-48.8098	-46.4191	-17.5636	-42.5316	-41.5486	-70.351	-83.1196
1.21506	-1.03154	-1.1196	-0.025159	0	0	2.41531	0	-6.10117	-11.6614		-40.147	-0.249379	-48.8098	-46.4191	-17.5636	-42.5295	-41.5486	-70.3564	-83.13
1.21595	-1.00638	-1.1196	-0.025159	0	0	1.44667	0	-5.7112	-11.5859		-40.1478	-0.250375	-48.8098	-46.4191	-17.5636	-42.5282	-41.5486	-70.3615	-83.1403
1.21684	-1.00638	-1.10702	-0.01258	0	0	0.717045	0	-5.22059	-11.5482		-40.1487	-0.251361	-48.8098	-46.4191	-17.5636	-42.5276	-41.5486	-70.3661	-83.1505
1.21773	-0.754784	-1.06928	0	0	0	0.314493	0	-4.57902	-11.4727		-40.1494	-0.252312	-48.8098	-46.4191	-17.5636	-42.5273	-41.5486	-70.3702	-83.1608
1.21862	-0.50319	-1.04412	0	0	0	0.125797	0	-4.37775	-11.4727		-40.1499	-0.253242	-48.8098	-46.4191	-17.5636	-42.5272	-41.5486	-70.3741	-83.171
1.21951	-0.50319	-1.01896	0	0	0	0.025159	0	-4.40291	-11.5105		-40.1503	-0.254148	-48.8098	-46.4191	-17.5636	-42.5272	-41.5486	-70.378	-83.1812
1.2204	-0.251595	-1.00638	0	0	0	0	0	-4.36517	-11.5105		-40.1505	-0.255044	-48.8098	-46.4191	-17.5636	-42.5272	-41.5486	-70.3819	-83.1915
1.22129	0	-1.00638	0	0	0	0	0	-4.31485	-11.5356		-40.1505	-0.25594	-48.8098	-46.4191	-17.5636	-42.5272	-41.5486	-70.3858	-83.2017
1.22218	0	-1.25797	0	0	0	0	0	-4.21421	-11.6111		-40.1505	-0.257059	-48.8098	-46.4191	-17.5636	-42.5272	-41.5486	-70.3895	-83.2121
1.22307	0	-1.25797	0	0	0	0	0	-3.98778	-11.6111		-40.1505	-0.258179	-48.8098	-46.4191	-17.5636	-42.5272	-41.5486	-70.3931	-83.2224
1.22396	0	-1.50957	0	0	0	0	0	-3.44685	-11.6237		-40.1505	-0.259523	-48.8098	-46.4191	-17.5636	-42.5272	-41.5486	-70.3961	-83.2327
1.22485	0	-1.76116	-0.01258	0	0	0	0	-3.27073	-11.6488		-40.1505	-0.26109	-48.8098	-46.4191	-17.5636	-42.5272	-41.5486	-70.399	-83.2431
1.22574	0	-2.01276	-0.01258	0	0	0	0	-3.27073	-11.6363		-40.1505	-0.262881	-48.8099	-46.4191	-17.5636	-42.5272	-41.5486	-70.402	-83.2535
1.22663	0	-2.26435	-0.01258	-0.075478	0	0	0	-3.30847	-11.6363		-40.1505	-0.264897	-48.8099	-46.4192	-17.5636	-42.5272	-41.5486	-70.4049	-83.2638
1.22752	-0.01258	-2.51595	-0.01258	-0.088058	0	0	0	-3.35879	-11.6237		-40.1505	-0.267136	-48.8099	-46.4192	-17.5636	-42.5272	-41.5486	-70.4079	-83.2742
1.22841	-0.01258	-2.51595	-0.01258	-0.088058	0	0	0	-3.45943	-11.5734		-40.1506	-0.269375	-48.8099	-46.4193	-17.5636	-42.5272	-41.5486	-70.411	-83.2845
1.2293	-0.01258	-2.50337	0	-0.088058	0	0	0	-3.42169	-11.5105		-40.1506	-0.271603	-48.8099	-46.4194	-17.5636	-42.5272	-41.5486	-70.414	-83.2947
1.23019	-0.01258	-2.50337	0	-0.088058	0	0	0	-3.30847	-11.4853		-40.1506	-0.273831	-48.8099	-46.4195	-17.5636	-42.5272	-41.5486	-70.417	-83.3049
1.23108	-0.01258	-2.50337	0	-0.01258	0	0	0	-3.14493	-11.3343		-40.1506	-0.276059	-48.8099	-46.4195	-17.5636	-42.5272	-41.5486	-70.4198	-83.315
1.23197	0	-2.50337	0	0	0	0	0	-2.95624	-11.2337		-40.1506	-0.278287	-48.8099	-46.4195	-17.5636	-42.5272	-41.5486	-70.4224	-83.325
1.23287	0	-2.50337	0	-0.025159	0	0	0	-2.69206	-11.1456		-40.1506	-0.280515	-48.8099	-46.4195	-17.5636	-42.5272	-41.5486	-70.4248	-83.3349
1.23375	-0.251595	-2.26435	0	-0.062899	0	0	0	-2.15114	-11.0324		-40.1508	-0.28253	-48.8099	-46.4196	-17.5636	-42.5272	-41.5486	-70.4267	-83.3447
1.23464	-0.50319	-2.26435	0	-0.062899	0	0	0	-1.76116	-10.8186		-40.1513	-0.284546	-48.8099	-46.4196	-17.5636	-42.5272	-41.5486	-70.4283	-83.3544
1.23554	-0.754784	-2.26435	0	-0.062899	0	0	0	-1.57247	-10.7808		-40.1519	-0.286561	-48.8099	-46.4197	-17.5636	-42.5272	-41.5486	-70.4297	-83.364
1.23643	-1.00638	-2.01276	0	-0.062899	0	0	0	-1.39635	-10.7431		-40.1528	-0.288352	-48.8099	-46.4197	-17.5636	-42.5272	-41.5486	-70.4309	-83.3735
1.23731	-1.25797	-1.77374	0	-0.037739	0	0	0	-1.27055	-10.7557		-40.1539	-0.289931	-48.8099	-46.4198	-17.5636	-42.5272	-41.5486	-70.432	-83.3831
1.23821	-1.00638	-1.7989	0	0	0	0	0	-1.34603	-10.8186		-40.1548	-0.291532	-48.8099	-46.4198	-17.5636	-42.5272	-41.5486	-70.4332	-83.3927
1.2391	-0.754784	-1.55989	0	0	0	0	0	-1.28313	-10.9066		-40.1555	-0.29292	-48.8099	-46.4198	-17.5636	-42.5272	-41.5486	-70.4344	-83.4024
1.23999	-0.50319	-1.33345	0	0	0	0	0	-1.1825	-10.9444		-40.156	-0.294107	-48.8099	-46.4198	-17.5636	-42.5272	-41.5486	-70.4354	-83.4122
1.24088	-0.251595	-1.35861	0	0	0	0	0	-1.09444	-10.9444		-40.1562	-0.295316	-48.8099	-46.4198	-17.5636	-42.5272	-41.5486	-70.4364	-83.4219
1.24177	0	-1.37119	0	0	0	0	0	-1.0567	-10.9821		-40.1562	-0.296536	-48.8099	-46.4198	-17.5636	-42.5272	-41.5486	-70.4373	-83.4317
1.24266	0	-1.37119	0	0	0	0	0	-1.04412	-11.045		-40.1562	-0.297757	-48.8099	-46.4198	-17.5636	-42.5272	-41.5486	-70.4383	-83.4415
1.24355	-0.025159	-1.37119	0	0	0	0	0	-1.33345	-11.0324		-40.1562	-0.298977	-48.8099	-46.4198	-17.5636	-42.5272	-41.5486	-70.4395	-83.4513
1.24444	-0.050319	-1.34603	0	0	0	0	0	-1.45925	-10.9695		-40.1563	-0.300175	-48.8099	-46.4198	-17.5636	-42.5272	-41.5486	-70.4408	-83.4611
1.24533	-0.062899	-1.32087	0	0	0	0	0	-1.62279	-10.8815		-40.1563	-0.301351	-48.8099	-46.4198	-17.5636	-42.5272	-41.5486	-70.4422	-83.4708
1.24622	-0.062899	-1.29571	0	0	0	0	0	-1.67311	-10.7683		-40.1564	-0.302504	-48.8099	-46.4198	-17.5636	-42.5272	-41.5486	-70.4437	-83.4804
1.24711	-0.062899	-1.27055	0	0	0	0	0	-1.61021	-10.6047		-40.1564	-0.303635	-48.8099	-46.4198	-17.5636	-42.5272	-41.5486	-70.4451	-83.4898
1.248	-0.037739	-1.25797	0	0	0	0	0	-1.34603	-10.6173		-40.1565	-0.304754	-48.8099	-46.4198	-17.5636	-42.5272	-41.5486	-70.4463	-83.4993
1.24889	-0.01258	-1.25797	0	0	0	0	0	-1.19508	-10.7179		-40.1565	-0.305874	-48.8099	-46.4198	-17.5636	-42.5272	-41.5486	-70.4474	-83.5088
1.24978	-0.251595	-1.25797	-0.062899	0	0	0	0	-1.08186	-10.8437		-40.1567	-0.306993	-48.8099	-46.4198	-17.5636	-42.5272	-41.5486	-70.4483	-83.5185
1.25067	-0.50319	-1.25797	-0.062899	0	0	0	0	-1.13218	-10.7934		-40.1571	-0.308113	-48.81	-46.4198	-17.5636	-42.5272	-41.5486	-70.4494	-83.5281
1.25156	-0.754784	-1.25797	-0.062899	0	0	0	0	-1.22023	-10.8186		-40.1578	-0.309233	-48.8101	-46.4198	-17.5636	-42.5272	-41.5486	-70.4504	-83.5377
1.25245	-1.00638	-1.25797	-0.062899	0	0	0	0	-1.33345	-10.7557		-40.1587	-0.310352	-48.8101	-46.4198	-17.5636	-42.5272	-41.5486	-70.4516	-83.5473
1.25334	-1.25797	-1.25797	-0.062899	0	0	0	0	-1.37119	-10.6802		-40.1598	-0.311472	-48.8102	-46.4198	-17.5636	-42.5272	-41.5486	-70.4528	-83.5568
1.25423	-1.25797	-1.25797	-0.01258	0	0	0	0	-1.19508	-10.6676		-40.1609	-0.312591	-48.8102	-46.4198	-17.5636	-42.5272	-41.5486	-70.4539	-83.5663
1.25512	-1.25797	-1.25797	-0.251595	0	0	0	0	-0.993799	-10.806		-40.1621	-0.313711	-48.8104	-46.4198	-17.5636	-42.5272	-41.5486	-70.4548	-83.5759
1.25601	-1.24539	-1.25797	-0.251595	0	0	0	0	-0.779944	-11.0324		-40.1632	-0.314831	-48.8106	-46.4198	-17.5636	-42.5272	-41.5486	-70.4555	-83.5857
1.2569	-1.24539	-1.25797	-0.251595	0	0	0	0	-0.50319	-11.1834		-40.1643	-0.31595	-48.8108	-46.4198	-17.5636	-42.5272	-41.5486	-70.4559	-83.5956
1.25779	-1.24539	-1.25797	-0.251595	0	0	0	0	-0.364812	-11.2463		-40.1654	-0.31707	-48.8111	-46.4198	-17.5636	-42.5272	-41.5486	-70.4563	-83.6057
1.25868	-1.24539	-1.25797	-0.239015	0	0	0	0	-0.427711	-11.2714		-40.1665	-0.318189	-48.8113	-46.4198	-17.5636	-42.5272	-41.5486	-70.4566	-83.6157
1.25957	-1.24539	-1.25797	0	0	0	0	0	-0.528349	-11.2714		-40.1676	-0.319309	-48.8113	-46.4198	-17.5636	-42.5272	-41.5486	-70.4571	-83.6257
1.26046	-1.25797	-1.25797	0	0	0	0	0	-0.679306	-11.0828		-40.1687	-0.320429	-48.8113	-46.4198	-17.5636	-42.5272	-41.5486	-70.4577	-83.6356
1.26135	-1.25797	-1.25797	0	0	0	0	0	-0.805103	-10.9444		-40.1698	-0.321548	-48.8113	-46.4198	-17.5636	-42.5272	-41.5486	-70.4584	-83.6453
1.26224	-1.25797	-1.25797	0	0	0	0	0	-0.868002	-10.9695		-40.171	-0.322668	-48.8113	-46.4198	-17.5636	-42.5272	-41.5486	-70.4592	-83.6551
1.26313	-1.25797	-1.25797	0	0	0	0	0	-0.805103	-10.9821		-40.1721	-0.323787	-48.8113	-46.4198	-17.5636	-42.5272	-41.5486	-70.4599	-83.6649
1.26402	-1.28313	-1.25797	0	0	0	0	0	-0.679306	-10.9444		-40.1732	-0.324907	-48.8113	-46.4198	-17.5636	-42.5272	-41.5486	-70.4605	-83.6746
1.26491	-1.28313	-1.25797	0	0	0	0	0	-0.50319	-11.0199		-40.1744	-0.326027	-48.8113	-46.4198	-17.5636	-42.5272	-41.5486	-70.461	-83.6844
1.2658	-1.28313	-1.00638	0	0	0	0	0	-0.364812	-11.1582		-40.1755	-0.326922	-48.8113	-46.4198	-17.5636	-42.5272	-41.5486	-70.4613	-83.6943
1.26669	-1.03154	-1.00638	0	0	0	0	0	-0.264175	-11.1708		-40.1764	-0.327818	-48.8113	-46.4198	-17.5636	-42.5272	-41.5486	-70.4615	-83.7043
1.26758	-0.779944	-0.754784	0	0	0	0	0	-0.239015	-11.0953		-40.1771	-0.32849	-48.8113	-46.4198	-17.5636	-42.5272	-41.5486	-70.4617	-83.7142
1.26847	-0.50319	-0.50319	0	0	0	0	0	-0.226435	-11.0953		-40.1776	-0.328938	-48.8113	-46.4198	-17.5636	-42.5272	-41.5486	-70.4619	-83.724
1.26936	-0.251595	-0.251595	0	0	0	0	0	-0.327073	-11.0953		-40.1778	-0.329161	-48.8113	-46.4198	-17.5636	-42.5272	-41.5486	-70.4622	-83.7339
1.27025	0	-0.251595	0	0	0	0	0	-0.49061	-11.0073		-40.1778	-0.329385	-48.8113	-46.4198	-17.5636	-42.5272	-41.5486	-70.4627	-83.7437
1.27114	0	0	0	0	0	0	0	-0.691886	-10.8941		-40.1778	-0.329385	-48.8113	-46.4198	-17.5636	-42.5272	-41.5486	-70.4633	-83.7534
1.27203	0	0	0	0	0	0	0	-0.754784	-10.9066		-40.1778	-0.329385	-48.8113	-46.4198	-17.5636	-42.5272	-41.5486	-70.464	-83.7631
1.27292	0	0	0	0	0	0	0	-0.729625	-10.9695		-40.1778	-0.329385	-48.8113	-46.4198	-17.5636	-42.5272	-41.5486	-70.4646	-83.7729
1.27381	0	0	0	0	0	0	0	-0.704465	-10.9192		-40.1778	-0.329385	-48.8113	-46.4198	-17.5636	-42.5272	-41.5486	-70.4652	-83.7826
1.2747	0	-0.251595	0	0	0	0	0	-0.566088	-10.8689		-40.1778	-0.329609	-48.8113	-46.4198	-17.5636	-42.5272	-41.5486	-70.4657	-83.7923
1.27559	0	-0.251595	0	0	0	0	0	-0.440291	-10.9066		-40.1778	-0.329833	-48.8113	-46.4198	-17.5636	-42.5272	-41.5486	-70.4661	-83.802
1.27648	0	-0.251595	0	0	0	0	0	-0.578668	-10.806		-40.1778	-0.330057	-48.8113	-46.4198	-17.5636	-42.5272	-41.5486	-70.4667	-83.8116
1.27737	0	-0.251595	0	0	0	0	0	-0.779944	-10.7683		-40.1778	-0.330281	-48.8113	-46.4198	-17.5636	-42.5272	-41.5486	-70.4673	-83.8212
1.27826	0	-0.251595	0	0	0	0	0	-0.754784	-10.6676		-40.1778	-0.330505	-48.8113	-46.4198	-17.5636	-42.5272	-41.5486	-70.468	-83.8307
1.27915	-0.025159	0	0	0	0	0	0	-0.779944	-10.7934		-40.1778	-0.330505	-48.8113	-46.4198	-17.5636	-42.5272	-41.5486	-70.4687	-83.8403
1.28004	-0.050319	0	0	0	0	0	0	-0.830263	-10.8437		-40.1779	-0.330505	-48.8113	-46.4198	-17.5636	-42.5272	-41.5486	-70.4695	-83.8499
1.28093	-0.075478	0	0	0	0	0	0	-0.729625	-10.9695		-40.1779	-0.330505	-48.8113	-46.4198	-17.5636	-42.5272	-41.5486	-70.4701	-83.8597
1.28182	-0.088058	0	0	0	0	0	0	-0.654146	-10.9066		-40.178	-0.330505	-48.8113	-46.4198	-17.5636	-42.5272	-41.5486	-70.4707	-83.8694
1.28271	-0.100638	0	0	0	0	0	0	-0.729625	-11.0828		-40.1781	-0.330505	-48.8113	-46.4198	-17.5636	-42.5272	-41.5486	-70.4713	-83.8793
1.2836	-0.075478	0	0	0	0	0	0	-0.779944	-11.1456		-40.1782	-0.330505	-48.8113	-46.4198	-17.5636	-42.5272	-41.5486	-70.472	-83.8892
1.28449	-0.050319	0	0	0	0	0	0	-0.666726	-11.2714		-40.1782	-0.330505	-48.8113	-46.4198	-17.5636	-42.5272	-41.5486	-70.4726	-83.8992
1.28538	-0.025159	0	0	0	0	0	0	-0.792524	-11.3218		-40.1782	-0.330505	-48.8113	-46.4198	-17.5636	-42.5272	-41.5486	-70.4733	-83.9093
1.28627	-0.01258	0	0	0	0	0	0	-0.95606	-11.5105		-40.1782	-0.330505	-48.8113	-46.4198	-17.5636	-42.5272	-41.5486	-70.4742	-83.9195
1.28716	0	0	0	0	0	0	0	-1.10702	-11.6614		-40.1782	-0.330505	-48.8113	-46.4198	-17.5636	-42.5272	-41.5486	-70.4752	-83.9299
1.28805	0	0	0	0	0	0	0	-1.45925	-11.7621		-40.1782	-0.330505	-48.8113	-46.4198	-17.5636	-42.5272	-41.5486	-70.4765	-83.9404
1.28894	0	0	0	0	0	0	0	-2.26435	-11.8375		-40.1782	-0.330505	-48.8113	-46.4198	-17.5636	-42.5272	-41.5486	-70.4785	-83.9509
1.28983	0	0	0	0	0	0	0	-2.96882	-12.0011		-40.1782	-0.330505	-48.8113	-46.4198	-17.5636	-42.5272	-41.5486	-70.4811	-83.9616
1.29072	0	0	0	0	0	0	0	-4.12615	-12.0765		-40.1782	-0.330505	-48.8113	-46.4198	-17.5636	-42.5272	-41.5486	-70.4848	-83.9723
1.29161	0	0	0	0	0	0	0	-5.7741	-12.0765		-40.1782	-0.330505	-48.8113	-46.4198	-17.5636	-42.5272	-41.5486	-70.4899	-83.9831
1.29251	0	0	0	0	0	0	0	-7.44721	-12.1646		-40.1782	-0.330505	-48.8113	-46.4198	-17.5636	-42.5272	-41.5486	-70.4966	-83.9939
1.2934	0	0	0	0	0	0	0	-8.78066	-12.303		-40.1782	-0.330505	-48.8113	-46.4198	-17.5636	-42.5272	-41.5486	-70.5044	-84.0049
1.29428	0	0	0	0	0	0	0	-10.1015	-12.5043		-40.1782	-0.330505	-48.8113	-46.4198	-17.5636	-42.5272	-41.5486	-70.5134	-84.016
1.29517	0	0	0	0	0	0	0	-10.9821	-12.9697		-40.1782	-0.330505	-48.8113	-46.4198	-17.5636	-42.5272	-41.5486	-70.5231	-84.0275
1.29607	0	0	0	0	0	0	0	-11.4224	-13.3723		-40.1782	-0.330505	-48.8113	-46.4198	-17.5636	-42.5272	-41.5486	-70.5333	-84.0394
1.29696	0	0	0	0	0	0	0	-11.6363	-13.8		-40.1782	-0.330505	-48.8113	-46.4198	-17.5636	-42.5272	-41.5486	-70.5437	-84.0517
1.29785	0	0	0	0	0	0	0	-11.825	-14.5925		-40.1782	-0.330505	-48.8113	-46.4198	-17.5636	-42.5272	-41.5486	-70.5542	-84.0647
1.29874	0	0	0	0	0	0	0	-11.9382	-15.2718		-40.1782	-0.330505	-48.8113	-46.4198	-17.5636	-42.5272	-41.5486	-70.5648	-84.0783
1.29963	0	0	0	0	0	0	0	-11.9885	-15.6492		-40.1782	-0.330505	-48.8113	-46.4198	-17.5636	-42.5272	-41.5486	-70.5755	-84.0922
1.30052	0	0	0	0	0	0	0	-12.0262	-16.2279		-40.1782	-0.330505	-48.8113	-46.4198	-17.5636	-42.5272	-41.5486	-70.5862	-84.1067
1.30141	0	0	0	0	0	0	0	-12.1017	-16.7562		-40.1782	-0.330505	-48.8113	-46.4198	-17.5636	-42.5272	-41.5486	-70.597	-84.1216
1.3023	0	0	0	0	0	0	0	-12.2652	-16.7436		-40.1782	-0.330505	-48.8113	-46.4198	-17.5636	-42.5272	-41.5486	-70.6079	-84.1365
1.30319	0	0	0	0	0	0	0	-12.3785	-16.7688		-40.1782	-0.330505	-48.8113	-46.4198	-17.5636	-42.5272	-41.5486	-70.6189	-84.1514
1.30408	0	0	0	0	0	0	0	-12.4288	-16.4166		-40.1782	-0.330505	-48.8113	-46.4198	-17.5636	-42.5272	-41.5486	-70.6299	-84.166
1.30497	0	0	0	0	0	0	0	-12.542	-15.9637		-40.1782	-0.330505	-48.8113	-46.4198	-17.5636	-42.5272	-41.5486	-70.6411	-84.1802
1.30586	-0.037739	0	0	0	0	0	0	-12.5168	-15.0328		-40.1783	-0.330505	-48.8113	-46.4198	-17.5636	-42.5272	-41.5486	-70.6522	-84.1936
1.30675	-0.062899	0	0	0	0	0	0	-12.4288	-14.1648		-40.1783	-0.330505	-48.8113	-46.4198	-17.5636	-42.5272	-41.5486	-70.6633	-84.2062
1.30764	-0.088058	0	0	0	0	0	0	-12.3281	-13.259		-40.1784	-0.330505	-48.8113	-46.4198	-17.5636	-42.5272	-41.5486	-70.6743	-84.218
1.30853	-0.088058	0	0	0	0	0	0	-12.2778	-12.7684		-40.1785	-0.330505	-48.8113	-46.4198	-17.5636	-42.5272	-41.5486	-70.6852	-84.2294
1.30942	-0.088058	0	0	0	0	0	0	-12.1646	-12.2275		-40.1786	-0.330505	-48.8113	-46.4198	-17.5636	-42.5272	-41.5486	-70.696	-84.2403
1.31031	-0.050319	0	0	0	0	0	0	-12.0891	-11.7621		-40.1786	-0.330505	-48.8113	-46.4198	-17.5636	-42.5272	-41.5486	-70.7068	-84.2507
1.3112	-0.025159	0	0	0	0	0	0	-12.0137	-10.1896		-40.1786	-0.330505	-48.8113	-46.4198	-17.5636	-42.5272	-41.5486	-70.7175	-84.2598
1.31209	0	0	0	0	0	0	0	-11.8124	-7.77428		-40.1786	-0.330505	-48.8113	-46.4198	-17.5636	-42.5272	-41.5486	-70.728	-84.2667
1.31298	0	0	0	0	0	0	0	-11.3721	-5.35897		-40.1786	-0.330505	-48.8113	-46.4198	-17.5636	-42.5272	-41.5486	-70.7381	-84.2715
1.31387	0	0	0	0	0	0	0	-9.86252	-2.95624		-40.1786	-0.330505	-48.8113	-46.4198	-17.5636	-42.5272	-41.5486	-70.7469	-84.2741
1.31476	0	0	0	0	0	0	0	-7.66106	-0.893162		-40.1786	-0.330505	-48.8113	-46.4198	-17.5636	-42.5272	-41.5486	-70.7537	-84.2749
1.31565	0	0	0	0	0	0	0	-5.27091	0		-40.1786	-0.330505	-48.8113	-46.4198	-17.5636	-42.5272	-41.5486	-70.7584	-84.2749
1.31654	0	0	0	0	0	0	0	-3.0443	0		-40.1786	-0.330505	-48.8113	-46.4198	-17.5636	-42.5272	-41.5486	-70.7611	-84.2749
1.31743	0	0	0	0	0	0	0	-1.06928	0		-40.1786	-0.330505	-48.8113	-46.4198	-17.5636	-42.5272	-41.5486	-70.7621	-84.2749
1.31832	0	0	0	0	0	0	0	-0.113218	0		-40.1786	-0.330505	-48.8113	-46.4198	-17.5636	-42.5272	-41.5486	-70.7622	-84.2749
1.31921	0	0	0	0	0	0	0	0.163537	0		-40.1786	-0.330505	-48.8113	-46.4198	-17.5636	-42.5272	-41.5486	-70.762	-84.2749
1.3201	0	0	0	0	0	0	0	0.352233	0		-40.1786	-0.330505	-48.8113	-46.4198	-17.5636	-42.5272	-41.5486	-70.7617	-84.2749
1.32099	0	0	0	0	0	0	0	0.754784	0		-40.1786	-0.330505	-48.8113	-46.4198	-17.5636	-42.5272	-41.5486	-70.761	-84.2749
1.32188	0	0	0	0	0	0	0	1.34603	0		-40.1786	-0.330505	-48.8113	-46.4198	-17.5636	-42.5272	-41.5486	-70.7598	-84.2749
1.32277	0	0	0	0	0	0	0	1.84922	0		-40.1786	-0.330505	-48.8113	-46.4198	-17.5636	-42.5272	-41.5486	-70.7582	-84.2749
1.32366	0	0	0	0	0	0	0	1.97502	0		-40.1786	-0.330505	-48.8113	-46.4198	-17.5636	-42.5272	-41.5486	-70.7564	-84.2749
1.32455	0	0	0	0	0	0	0	1.82406	0		-40.1786	-0.330505	-48.8113	-46.4198	-17.5636	-42.5272	-41.5486	-70.7548	-84.2749
1.32544	-0.01258	0	0	0	0	0	0	1.44667	0		-40.1786	-0.330505	-48.8113	-46.4198	-17.5636	-42.5272	-41.5486	-70.7535	-84.2749
1.32633	-0.037739	0	0	0	0	0	0	0.855422	0		-40.1787	-0.330505	-48.8113	-46.4198	-17.5636	-42.5272	-41.5486	-70.7528	-84.2749
1.32722	-0.113218	0	0	0	0	0	0	0.301914	0		-40.1788	-0.330505	-48.8113	-46.4198	-17.5636	-42.5272	-41.5486	-70.7525	-84.2749
1.32811	-0.188696	0	0	0	0	0	0	0.062899	0		-40.1789	-0.330505	-48.8113	-46.4198	-17.5636	-42.5272	-41.5486	-70.7524	-84.2749
1.329	-0.276754	0	0	0	0	0	0	0.025159	0		-40.1792	-0.330505	-48.8113	-46.4198	-17.5636	-42.5272	-41.5486	-70.7524	-84.2749
1.32989	-0.364812	0	0	0	0	0	0	0	0		-40.1795	-0.330505	-48.8113	-46.4198	-17.5636	-42.5272	-41.5486	-70.7524	-84.2749
1.33078	-0.452871	0	0	0	0	0	0	0	0		-40.1799	-0.330505	-48.8113	-46.4198	-17.5636	-42.5272	-41.5486	-70.7524	-84.2749
1.33167	-0.49061	0	0	0	0	0	0	0	0		-40.1804	-0.330505	-48.8113	-46.4198	-17.5636	-42.5272	-41.5486	-70.7524	-84.2749
1.33256	-0.528349	0	0	0	0	0	0	0	0		-40.1808	-0.330505	-48.8113	-46.4198	-17.5636	-42.5272	-41.5486	-70.7524	-84.2749
1.33345	-0.553509	0	0	0	0	0	0	0	0		-40.1813	-0.330505	-48.8113	-46.4198	-17.5636	-42.5272	-41.5486	-70.7524	-84.2749
1.33434	-0.566088	0	0	0	0	0	0	0	0		-40.1818	-0.330505	-48.8113	-46.4198	-17.5636	-42.5272	-41.5486	-70.7524	-84.2749
1.33523	-0.553509	0	0	0	0	0	0	0	0		-40.1823	-0.330505	-48.8113	-46.4198	-17.5636	-42.5272	-41.5486	-70.7524	-84.2749
1.33612	-0.47803	0	0	0	0	0	0	0	0		-40.1827	-0.330505	-48.8113	-46.4198	-17.5636	-42.5272	-41.5486	-70.7524	-84.2749
1.33701	-0.364812	0	0	0	0	0	0	0	0		-40.1831	-0.330505	-48.8113	-46.4198	-17.5636	-42.5272	-41.5486	-70.7524	-84.2749
1.3379	-0.251595	0	0	0	0	0	0	0	0		-40.1833	-0.330505	-48.8113	-46.4198	-17.5636	-42.5272	-41.5486	-70.7524	-84.2749
1.33879	-0.138377	0	0	0	0	0	0.088058	0	0		-40.1834	-0.330505	-48.8113	-46.4198	-17.5636	-42.5272	-41.5485	-70.7524	-84.2749
1.33968	-0.037739	0	0	0	0	0	0.553509	0	0		-40.1834	-0.330505	-48.8113	-46.4198	-17.5636	-42.5272	-41.548	-70.7524	-84.2749
1.34057	0	0	0	0	0	0	2.1763	0	-0.01258		-40.1834	-0.330505	-48.8113	-46.4198	-17.5636	-42.5272	-41.5461	-70.7524	-84.2749
1.34146	0	0	0	0	0	0	4.56644	0	-0.01258		-40.1834	-0.330505	-48.8113	-46.4198	-17.5636	-42.5272	-41.542	-70.7524	-84.2749
1.34235	0	0	0	0	0	0	6.98175	0	-0.01258		-40.1834	-0.330505	-48.8113	-46.4198	-17.5636	-42.5272	-41.5358	-70.7524	-84.2749
1.34324	0	0	0	0	0	0	9.30901	0	-0.050319		-40.1834	-0.330505	-48.8113	-46.4198	-17.5636	-42.5272	-41.5275	-70.7524	-84.275
1.34413	0	0	0	0	0.301914	0	11.2966	0	-0.050319		-40.1834	-0.330505	-48.8113	-46.4198	-17.5633	-42.5272	-41.5174	-70.7524	-84.275
1.34502	0	0	0	0	2.10082	0	12.3281	0	-0.037739		-40.1834	-0.330505	-48.8113	-46.4198	-17.5614	-42.5272	-41.5065	-70.7524	-84.2751
1.34591	0	0	0	0	4.40291	0	12.7559	0	-0.037739		-40.1834	-0.330505	-48.8113	-46.4198	-17.5575	-42.5272	-41.4951	-70.7524	-84.2751
1.3468	0	0	0	0	6.81822	0	13.2716	0	-0.037739		-40.1834	-0.330505	-48.8113	-46.4198	-17.5514	-42.5272	-41.4833	-70.7524	-84.2751
1.34769	0	0	0	0	9.30901	0	13.8629	0	-0.01258		-40.1834	-0.330505	-48.8113	-46.4198	-17.5432	-42.5272	-41.471	-70.7524	-84.2751
1.34858	0	0	0	0	11.4727	0	14.4164	0	-0.01258		-40.1834	-0.330505	-48.8113	-46.4198	-17.5329	-42.5272	-41.4581	-70.7524	-84.2752
1.34947	0	0	0	0	12.1898	0	14.517	0	-0.01258		-40.1834	-0.330505	-48.8113	-46.4198	-17.5221	-42.5272	-41.4452	-70.7524	-84.2752
1.35037	0	0	0	0	12.5168	0	14.3912	0	-0.037739		-40.1834	-0.330505	-48.8113	-46.4198	-17.511	-42.5272	-41.4324	-70.7524	-84.2752
1.35126	0	0	0	0	12.8691	0	13.9132	0	-0.037739		-40.1834	-0.330505	-48.8113	-46.4198	-17.4995	-42.5272	-41.42	-70.7524	-84.2752
1.35214	0	0	0	0	13.1584	0	13.3219	0	-0.025159		-40.1834	-0.330505	-48.8113	-46.4198	-17.4878	-42.5272	-41.4082	-70.7524	-84.2753
1.35303	0	0	0	0	13.4352	0	12.7307	0	-0.025159		-40.1834	-0.330505	-48.8113	-46.4198	-17.4758	-42.5272	-41.3968	-70.7524	-84.2753
1.35393	0	0	0	0	13.649	0	12.391	0	-0.100638		-40.1834	-0.330505	-48.8113	-46.4198	-17.4637	-42.5272	-41.3858	-70.7524	-84.2754
1.35482	0	0	0	0	13.6364	0	12.1143	0	-0.176116		-40.1834	-0.330505	-48.8113	-46.4198	-17.4515	-42.5272	-41.375	-70.7524	-84.2755
1.35571	0	0	0	0	13.3974	0	12.0765	0	-0.352233		-40.1834	-0.330505	-48.8113	-46.4198	-17.4396	-42.5272	-41.3643	-70.7524	-84.2758
1.3566	0	0	0	0	13.1961	0	12.0765	0	-0.389972		-40.1834	-0.330505	-48.8113	-46.4198	-17.4279	-42.5272	-41.3535	-70.7524	-84.2762
1.35749	0	0	0	0	12.9949	0	12.0388	0	-0.427711		-40.1834	-0.330505	-48.8113	-46.4198	-17.4163	-42.5272	-41.3428	-70.7524	-84.2766
1.35838	0	0	0	0	12.7559	0	11.9508	0	-0.352233		-40.1834	-0.330505	-48.8113	-46.4198	-17.405	-42.5272	-41.3322	-70.7524	-84.2769
1.35927	0	0	0	0	12.5546	0	11.6237	0	-0.251595		-40.1834	-0.330505	-48.8113	-46.4198	-17.3938	-42.5272	-41.3218	-70.7524	-84.2771
1.36016	0	0	0	0	12.4414	0	11.2463	0	-0.075478		-40.1834	-0.330505	-48.8113	-46.4198	-17.3827	-42.5272	-41.3118	-70.7524	-84.2772
1.36105	0	0	0	0	12.2778	0	10.7431	0	-0.037739		-40.1834	-0.330505	-48.8113	-46.4198	-17.3718	-42.5272	-41.3023	-70.7524	-84.2772
1.36194	0	0	0	0	12.152	0	10.089	0	0		-40.1834	-0.330505	-48.8113	-46.4198	-17.361	-42.5272	-41.2933	-70.7524	-84.2772
1.36283	0	0	0	0	12.0514	0	9.14547	0	0		-40.1834	-0.330505	-48.8113	-46.4198	-17.3502	-42.5272	-41.2852	-70.7524	-84.2772
1.36372	0	0	0	0	12.0388	0	8.29005	0	0		-40.1834	-0.330505	-48.8113	-46.4198	-17.3395	-42.5272	-41.2778	-70.7524	-84.2772
1.36461	-0.213856	0	0	0	12.0262	0	7.06981	0	0		-40.1836	-0.330505	-48.8113	-46.4198	-17.3288	-42.5272	-41.2715	-70.7524	-84.2772
1.3655	-0.213856	0	0	0	11.9885	0	5.63572	0	-0.037739		-40.1838	-0.330505	-48.8113	-46.4198	-17.3182	-42.5272	-41.2665	-70.7524	-84.2772
1.36639	-0.213856	0	0	0	11.9759	0	4.36517	0	-0.075478		-40.184	-0.330505	-48.8113	-46.4198	-17.3075	-42.5272	-41.2626	-70.7524	-84.2773
1.36728	-0.213856	0	0	0	11.9633	0	3.33363	0	-0.075478		-40.1842	-0.330505	-48.8113	-46.4198	-17.2969	-42.5272	-41.2596	-70.7524	-84.2774
1.36817	-0.213856	0	0	0	11.9759	0	2.32725	0	-0.075478		-40.1844	-0.330505	-48.8113	-46.4198	-17.2862	-42.5272	-41.2575	-70.7524	-84.2774
1.36906	-0.201276	0	0	0	11.9885	0	1.59763	0	-0.075478		-40.1846	-0.330505	-48.8113	-46.4198	-17.2755	-42.5272	-41.2561	-70.7524	-84.2775
1.36995	-0.213856	0	0	0	12.0262	0	1.1196	0	-0.037739		-40.1848	-0.330505	-48.8113	-46.4198	-17.2648	-42.5272	-41.2551	-70.7524	-84.2775
1.37084	-0.226435	0	0	0	12.0262	0	0.666726	0	0		-40.185	-0.330505	-48.8113	-46.4198	-17.2541	-42.5272	-41.2545	-70.7524	-84.2775
1.37173	-0.239015	0	0	0	12.0388	0	0.314493	0	0		-40.1852	-0.330505	-48.8113	-46.4198	-17.2434	-42.5272	-41.2543	-70.7524	-84.2775
1.37262	-0.251595	0	0	0	12.0011	0	0.088058	0	0		-40.1854	-0.330505	-48.8113	-46.4198	-17.2327	-42.5272	-41.2542	-70.7524	-84.2775
1.37351	-0.050319	0	0	0	11.8753	0	0	0	0		-40.1855	-0.330505	-48.8113	-46.4198	-17.2222	-42.5272	-41.2542	-70.7524	-84.2775
1.3744	-0.037739	0	0	0	11.7746	0	-0.088058	0	-0.01258		-40.1855	-0.330505	-48.8113	-46.4198	-17.2117	-42.5272	-41.2543	-70.7524	-84.2776
1.37529	-0.025159	0	0	0	11.6363	0	-0.327073	0	-0.01258		-40.1855	-0.330505	-48.8113	-46.4198	-17.2013	-42.5272	-41.2545	-70.7524	-84.2776
1.37618	-0.01258	0	0	0	11.4601	0	-1.64795	0	-0.01258		-40.1855	-0.330505	-48.8113	-46.4198	-17.1911	-42.5272	-41.256	-70.7524	-84.2776
1.37707	0.01258	0	0	0	11.1205	0	-3.92488	0	-0.01258		-40.1855	-0.330505	-48.8113	-46.4198	-17.1812	-42.5272	-41.2595	-70.7524	-84.2776
1.37796	0.264175	0	0	0	10.7683	0	-6.34019	0	-0.01258		-40.1853	-0.330505	-48.8113	-46.4198	-17.1716	-42.5272	-41.2651	-70.7524	-84.2776
1.37885	1.14476	0	0	0	10.0764	0	-10.0638	0	0		-40.1843	-0.330505	-48.8113	-46.4198	-17.1627	-42.5272	-41.2741	-70.7524	-84.2776
1.37974	2.33983	0	0	0	8.85614	0	-14.6554	0	0		-40.1822	-0.330505	-48.8113	-46.4198	-17.1548	-42.5272	-41.2871	-70.7524	-84.2776
1.38063	2.96882	0	0	0	7.17045	0	-20.0898	0	0		-40.1795	-0.330505	-48.8113	-46.4198	-17.1484	-42.5272	-41.305	-70.7524	-84.2776
1.38152	3.13236	0	0	0	5.35897	0	-27.0339	0	0		-40.1767	-0.330505	-48.8113	-46.4198	-17.1436	-42.5272	-41.3291	-70.7524	-84.2776
1.38241	2.93108	0	0	0	3.52233	0	-37.475	0	-0.01258		-40.1741	-0.330505	-48.8113	-46.4198	-17.1405	-42.5272	-41.3624	-70.7524	-84.2776
1.3833	2.56627	0	0	0	1.91212	0	-53.3758	0	-0.01258		-40.1719	-0.330505	-48.8113	-46.4198	-17.1388	-42.5272	-41.4099	-70.7524	-84.2776
1.38419	2.9185	0	0	0	0.868002	0	-78.3592	0	-0.01258		-40.1693	-0.330505	-48.8113	-46.4198	-17.138	-42.5272	-41.4797	-70.7524	-84.2776
1.38508	4.17647	0	0	0	0.415131	0	-113.696	0	-0.01258		-40.1655	-0.330505	-48.8113	-46.4198	-17.1377	-42.5272	-41.5809	-70.7524	-84.2776
1.38597	6.07601	0	0	0	0.276754	0	-163.046	0	-0.01258		-40.1601	-0.330505	-48.8113	-46.4198	-17.1374	-42.5272	-41.726	-70.7524	-84.2777
1.38686	8.23973	0	0	0	0.188696	0	-218.019	0	0		-40.1528	-0.330505	-48.8113	-46.4198	-17.1372	-42.5272	-41.92	-70.7524	-84.2777
1.38775	9.7493	0	0	0	0.176116	0	-277.207	0	0		-40.1441	-0.330505	-48.8113	-46.4198	-17.1371	-42.5272	-42.1667	-70.7524	-84.2777
1.38864	10.2776	0	0	0	0.213856	0	-331.942	0	1.08186		-40.135	-0.330505	-48.8113	-46.4198	-17.1369	-42.5272	-42.4622	-70.7524	-84.2767
1.38953	10.8941	0	0	0	0.528349	0	-371.127	0	3.24557		-40.1253	-0.330505	-48.8113	-46.4198	-17.1364	-42.5272	-42.7925	-70.7524	-84.2738
1.39042	11.8501	0	0	0	2.03792	0	-399.419	0	5.63572		-40.1147	-0.330505	-48.8113	-46.4198	-17.1346	-42.5272	-43.148	-70.7524	-84.2688
1.39131	12.7307	0	0	0	4.37775	0	-419.899	0	8.05103		-40.1034	-0.330505	-48.8113	-46.4198	-17.1307	-42.5272	-43.5217	-70.7524	-84.2616
1.3922	14.668	0	0	0	6.79306	0	-421.295	0	10.4538		-40.0903	-0.330505	-48.8113	-46.4198	-17.1247	-42.5272	-43.8966	-70.7524	-84.2523
1.39309	16.404	0	0	0	8.8813	0	-414.263	0	11.7495		-40.0757	-0.330505	-48.8113	-46.4198	-17.1168	-42.5272	-44.2653	-70.7524	-84.2419
1.39398	17.9387	0	0	0	9.84994	0	-417.698	0	11.9633		-40.0598	-0.330505	-48.8113	-46.4198	-17.108	-42.5272	-44.6371	-70.7524	-84.2312
1.39487	19.247	0	0	0	9.39706	0	-408.766	0	11.9759		-40.0426	-0.330505	-48.8113	-46.4198	-17.0996	-42.5272	-45.0009	-70.7524	-84.2206
1.39576	20.6434	0	0	0	8.64228	0	-408.967	0	11.9759		-40.0243	-0.330505	-48.8113	-46.4198	-17.0919	-42.5272	-45.3648	-70.7524	-84.2099
1.39665	22.2536	0	0	0	7.74912	0	-411.156	0	11.9885		-40.0045	-0.330505	-48.8113	-46.4198	-17.085	-42.5272	-45.7308	-70.7524	-84.1992
1.39754	24.0021	0	0	0	7.17045	0	-420.063	0	12.0137		-39.9831	-0.330505	-48.8113	-46.4198	-17.0787	-42.5272	-46.1046	-70.7524	-84.1885
1.39843	25.7885	0	0	0	7.22077	0	-431.309	0	12.0137		-39.9602	-0.330505	-48.8113	-46.4198	-17.0722	-42.5272	-46.4885	-70.7524	-84.1778
1.39932	27.5371	0	0	0	7.37173	0	-441.977	0	11.9759		-39.9356	-0.330505	-48.8113	-46.4198	-17.0657	-42.5272	-46.8819	-70.7524	-84.1672
1.40021	29.8895	0	0	0	6.66726	0	-438.039	0	11.9508		-39.909	-0.330505	-48.8113	-46.4198	-17.0597	-42.5272	-47.2717	-70.7524	-84.1565
1.4011	30.7323	0	0	0	5.68604	0	-445.964	0	11.9508		-39.8817	-0.330505	-48.8113	-46.4198	-17.0547	-42.5272	-47.6686	-70.7524	-84.1459
1.40199	31.7764	0	0	0	4.76772	0	-452.015	0	11.9508		-39.8534	-0.330505	-48.8113	-46.4198	-17.0504	-42.5272	-48.0709	-70.7524	-84.1353
1.40288	33.286	0	0	0	4.40291	0	-432.139	0	11.9633		-39.8238	-0.330505	-48.8113	-46.4198	-17.0465	-42.5272	-48.4555	-70.7524	-84.1246
1.40377	34.7201	0	0	0	5.32123	0	-429.196	0	11.9633		-39.7929	-0.330505	-48.8113	-46.4198	-17.0418	-42.5272	-48.8375	-70.7524	-84.114
1.40466	35.5755	0	0	0	6.85596	0	-429.611	0	11.913		-39.7612	-0.330505	-48.8113	-46.4198	-17.0357	-42.5272	-49.2198	-70.7524	-84.1034
1.40556	36.7203	0	0	0	10.7808	0	-426.378	0	11.7872		-39.7285	-0.330505	-48.8113	-46.4198	-17.0261	-42.5272	-49.5993	-70.7524	-84.0929
1.40644	37.9279	0	0	0	15.8882	0	-417.71	0	11.6866		-39.6948	-0.330505	-48.8113	-46.4198	-17.0119	-42.5272	-49.9711	-70.7524	-84.0825
1.40734	38.5946	0.717045	0	0	21.9013	0	-413.232	0	11.6111		-39.6604	-0.329867	-48.8113	-46.4198	-16.9925	-42.5272	-50.3389	-70.7524	-84.0721
1.40823	39.4501	2.31467	0	0	27.9019	0	-399.734	0	11.5734		-39.6253	-0.327807	-48.8113	-46.4198	-16.9676	-42.5272	-50.6946	-70.7524	-84.0618
1.40911	40.5319	4.34001	0	0	34.7452	0	-388.852	0	11.4601		-39.5893	-0.323944	-48.8113	-46.4198	-16.9367	-42.5272	-51.0407	-70.7524	-84.0516
1.41	42.5447	6.56662	0	0	40.3684	0	-375.467	0	11.4476		-39.5514	-0.3181	-48.8113	-46.4198	-16.9008	-42.5272	-51.3749	-70.7524	-84.0415
1.4109	44.4694	8.86872	0	0	45.4632	0	-365.907	0	11.3972		-39.5118	-0.310207	-48.8113	-46.4198	-16.8603	-42.5272	-51.7005	-70.7524	-84.0313
1.41179	45.9286	10.4538	0	0	49.8912	0	-366.322	0	11.2589		-39.4709	-0.300903	-48.8113	-46.4198	-16.8159	-42.5272	-52.0266	-70.7524	-84.0213
1.41268	46.4947	11.2085	0	0	53.3381	0	-368.876	0	11.1582		-39.4296	-0.290927	-48.8113	-46.4198	-16.7684	-42.5272	-52.3549	-70.7524	-84.0114
1.41357	47.0356	11.6111	0	0	56.0805	0	-361.542	0	11.1205		-39.3877	-0.280593	-48.8113	-46.4198	-16.7185	-42.5272	-52.6766	-70.7524	-84.0015
1.41446	47.0231	11.8627	0	0	57.9297	0	-355.352	0	11.0576		-39.3458	-0.270036	-48.8113	-46.4198	-16.667	-42.5272	-52.9929	-70.7524	-83.9916
1.41535	46.0041	12.0388	0	0	59.1122	0	-343.377	0	11.0576		-39.3049	-0.259321	-48.8113	-46.4198	-16.6144	-42.5272	-53.2985	-70.7524	-83.9818
1.41624	44.18	12.152	0	0	59.3512	0	-334.495	0	11.0073		-39.2656	-0.248506	-48.8113	-46.4198	-16.5615	-42.5272	-53.5962	-70.7524	-83.972
1.41713	42.356	12.2275	0	0	59.1122	0	-317.953	0	10.8312		-39.2279	-0.237623	-48.8113	-46.4198	-16.5089	-42.5272	-53.8792	-70.7524	-83.9623
1.41802	39.4752	12.1394	0	0	58.0052	0	-308.971	0	10.655		-39.1928	-0.226819	-48.8113	-46.4198	-16.4573	-42.5272	-54.1542	-70.7524	-83.9529
1.41891	35.2359	11.7998	0	0	56.6843	0	-297.121	0	10.3028		-39.1614	-0.216317	-48.8113	-46.4198	-16.4069	-42.5272	-54.4186	-70.7524	-83.9437
1.4198	30.9587	11.4098	0	0	54.8351	0	-288.214	0	9.79962		-39.1338	-0.206163	-48.8113	-46.4198	-16.358	-42.5272	-54.6751	-70.7524	-83.935
1.42069	27.2477	10.9947	0	0	52.5959	0	-277.66	0	9.24611		-39.1096	-0.196377	-48.8113	-46.4198	-16.3112	-42.5272	-54.9222	-70.7524	-83.9267
1.42158	24.1531	10.3909	0	0	50.4448	0	-270.464	0	8.5668		-39.0881	-0.187129	-48.8113	-46.4198	-16.2663	-42.5272	-55.1629	-70.7524	-83.9191
1.42247	22.0397	9.83736	0	0	48.5578	0	-261.42	0	7.64848		-39.0685	-0.178374	-48.8113	-46.4198	-16.2231	-42.5272	-55.3956	-70.7524	-83.9123
1.42336	21.4107	9.66124	0	0	46.3563	0	-253.431	0	6.23955		-39.0494	-0.169776	-48.8113	-46.4198	-16.1819	-42.5272	-55.6212	-70.7524	-83.9068
1.42425	21.8384	9.5606	0	0	44.1297	0	-246.437	0	4.56644		-39.03	-0.161267	-48.8113	-46.4198	-16.1426	-42.5272	-55.8405	-70.7524	-83.9027
1.42514	22.9832	9.51028	0	0	42.1924	0	-237.292	0	3.00656		-39.0095	-0.152803	-48.8113	-46.4198	-16.105	-42.5272	-56.0517	-70.7524	-83.9
1.42603	24.2286	9.63608	0	0	39.991	0	-228.096	0	1.63537		-38.988	-0.144226	-48.8113	-46.4198	-16.0695	-42.5272	-56.2547	-70.7524	-83.8986
1.42692	25.7256	9.71156	0	0	37.8776	0	-220.384	0	0.540929		-38.9651	-0.135583	-48.8113	-46.4198	-16.0357	-42.5272	-56.4508	-70.7524	-83.8981
1.42781	27.3358	9.6864	0	0	36.1164	0	-213.805	0	0.088058		-38.9407	-0.126962	-48.8113	-46.4198	-16.0036	-42.5272	-56.6411	-70.7524	-83.898
1.4287	28.166	9.6235	0	0	34.871	0	-208.22	0	0.050319		-38.9157	-0.118397	-48.8113	-46.4198	-15.9726	-42.5272	-56.8264	-70.7524	-83.898
1.42959	27.3358	9.53544	0	0	33.764	0	-203.741	0	0.100638		-38.8913	-0.109911	-48.8113	-46.4198	-15.9425	-42.5272	-57.0078	-70.7524	-83.8979
1.43048	25.7256	9.38449	0	0	32.9086	0	-200.257	0	0.100638		-38.8684	-0.101559	-48.8113	-46.4198	-15.9132	-42.5272	-57.186	-70.7524	-83.8978
1.43137	23.6751	8.59196	0	0	31.8519	0	-196.357	0	0.100638		-38.8474	-0.0939118	-48.8113	-46.4198	-15.8849	-42.5272	-57.3607	-70.7524	-83.8977
1.43226	21.134	7.77428	0	0	31.0216	0	-191.703	0	0.100638		-38.8286	-0.0869927	-48.8113	-46.4198	-15.8573	-42.5272	-57.5314	-70.7524	-83.8976
1.43315	18.3287	7.39689	0	0	29.9649	0	-187.036	0	0.062899		-38.8123	-0.0804095	-48.8113	-46.4198	-15.8306	-42.5272	-57.6978	-70.7524	-83.8975
1.43404	17.0078	7.13271	0	0	28.9963	0	-182.935	0	0		-38.7971	-0.0740613	-48.8113	-46.4198	-15.8048	-42.5272	-57.8606	-70.7524	-83.8975
1.43493	15.7247	6.8937	0	0	28.0277	0	-179.928	0	0		-38.7831	-0.067926	-48.8113	-46.4198	-15.7798	-42.5272	-58.0208	-70.7524	-83.8975
1.43582	14.1396	7.37173	0	0	27.1471	0	-176.292	0	0		-38.7705	-0.0613651	-48.8113	-46.4198	-15.7557	-42.5272	-58.1777	-70.7524	-83.8975
1.43671	12.4288	7.53526	0	0	26.3671	0	-172.393	0	0		-38.7595	-0.0546587	-48.8113	-46.4198	-15.7322	-42.5272	-58.3311	-70.7524	-83.8975
1.4376	11.0828	7.17045	0	0	25.713	0	-168.028	0	0		-38.7496	-0.048277	-48.8113	-46.4198	-15.7093	-42.5272	-58.4806	-70.7524	-83.8975
1.43849	9.40964	6.59178	0	0	25.0966	0	-164.606	0	1.8618		-38.7412	-0.0424103	-48.8113	-46.4198	-15.687	-42.5272	-58.6271	-70.7524	-83.8959
1.43938	8.02587	5.9628	0	0	24.6563	0	-159.41	0	5.19543		-38.7341	-0.0371035	-48.8113	-46.4198	-15.6651	-42.5272	-58.769	-70.7524	-83.8913
1.44027	6.69242	5.59798	0	0	24.3166	0	-156.064	0	11.7117		-38.7281	-0.0321212	-48.8113	-46.4198	-15.6434	-42.5272	-58.9079	-70.7524	-83.8808
1.44116	5.30865	5.32123	0	0	23.826	0	-152.265	0	20.0269		-38.7234	-0.0273854	-48.8113	-46.4198	-15.6222	-42.5272	-59.0434	-70.7524	-83.863
1.44205	4.27711	5.05706	0	0	23.3228	0	-149.082	0	29.1347		-38.7196	-0.0228846	-48.8113	-46.4198	-15.6014	-42.5272	-59.1761	-70.7524	-83.8371
1.44294	3.37137	4.55387	0	0	22.7567	0	-145.233	0	37.1857		-38.7166	-0.0188316	-48.8113	-46.4198	-15.5812	-42.5272	-59.3054	-70.7524	-83.804
1.44383	2.64174	3.8494	0	0	22.1403	0	-142.881	0	44.2052		-38.7143	-0.0154057	-48.8113	-46.4198	-15.5615	-42.5272	-59.4325	-70.7524	-83.7647
1.44472	2.03792	2.80528	0	0	21.461	0	-139.459	0	47.6143		-38.7124	-0.012909	-48.8113	-46.4198	-15.5424	-42.5272	-59.5567	-70.7524	-83.7223
1.44561	1.61021	1.67311	0	0	20.7314	0	-137.685	0	48.5201		-38.711	-0.0114199	-48.8113	-46.4198	-15.5239	-42.5272	-59.6792	-70.7524	-83.6791
1.4465	1.28313	0.50319	0	0	20.0395	0	-136.339	0	46.935		-38.7099	-0.0109721	-48.8113	-46.4198	-15.5061	-42.5272	-59.8005	-70.7524	-83.6373
1.44739	1.15734	-0.251595	0	0	19.2973	0	-135.194	0	42.5195		-38.7088	-0.011196	-48.8113	-46.4198	-15.4889	-42.5272	-59.9209	-70.7524	-83.5995
1.44828	0.94348	-0.729625	0	0	18.4293	0	-132.175	0	35.6384		-38.708	-0.0118454	-48.8113	-46.4198	-15.4725	-42.5272	-60.0385	-70.7524	-83.5678
1.44917	0.691886	-1.1196	0	0	17.4984	0	-131.408	0	27.449		-38.7074	-0.0128418	-48.8113	-46.4198	-15.457	-42.5272	-60.1554	-70.7524	-83.5433
1.45006	0.452871	-1.24539	0	0	16.5549	0	-129.408	-0.025159	18.228		-38.707	-0.0139502	-48.8113	-46.4198	-15.4422	-42.5272	-60.2706	-70.7524	-83.5271
1.45095	0.264175	-0.993799	0	0	15.624	0	-127.357	-0.025159	8.29005		-38.7067	-0.0148347	-48.8113	-46.4198	-15.4283	-42.5272	-60.384	-70.7525	-83.5197
1.45184	-0.201276	-0.754784	0	0	14.8189	0	-123.936	-0.025159	-1.55989		-38.7069	-0.0155064	-48.8113	-46.4198	-15.4151	-42.5272	-60.4943	-70.7525	-83.5211
1.45273	-0.754784	-0.50319	0	0	14.0516	0	-121.357	-0.025159	-10.9695		-38.7076	-0.0159543	-48.8113	-46.4198	-15.4026	-42.5272	-60.6023	-70.7525	-83.5309
1.45362	-1.25797	-0.251595	0	0	13.4477	0	-118.375	-0.025159	-20.5679		-38.7087	-0.0161782	-48.8113	-46.4198	-15.3906	-42.5272	-60.7076	-70.7525	-83.5492
1.45451	-1.76116	0	0	0	12.9823	0	-115.532	0	-30.4807		-38.7103	-0.0161782	-48.8113	-46.4198	-15.3791	-42.5272	-60.8105	-70.7525	-83.5763
1.4554	-2.00018	0	0	0	12.5294	0	-111.909	0	-40.3558		-38.7121	-0.0161782	-48.8113	-46.4198	-15.3679	-42.5272	-60.9101	-70.7525	-83.6122
1.45629	-1.74858	0	0	0	12.152	0	-109.985	0	-50.7718		-38.7136	-0.0161782	-48.8113	-46.4198	-15.3571	-42.5272	-61.0079	-70.7525	-83.6574
1.45718	-1.24539	0	0	0	12.0137	0	-109.318	0	-62.1313		-38.7147	-0.0161782	-48.8113	-46.4198	-15.3464	-42.5272	-61.1052	-70.7525	-83.7127
1.45807	-0.742205	0	0	0	12.0011	0	-106.903	0	-73.4657		-38.7154	-0.0161782	-48.8113	-46.4198	-15.3358	-42.5272	-61.2004	-70.7525	-83.7781
1.45896	-0.239015	0	0	0	11.913	0	-104.928	0	-86.3348		-38.7156	-0.0161782	-48.8113	-46.4198	-15.3252	-42.5272	-61.2938	-70.7525	-83.8549
1.45985	0	0	0	0	11.7998	0	-102.198	0	-99.7699		-38.7156	-0.0161782	-48.8113	-46.4198	-15.3147	-42.5272	-61.3847	-70.7525	-83.9437
1.46074	0	0	0	0	11.7621	0	-99.3548	0	-113.016		-38.7156	-0.0161782	-48.8113	-46.4198	-15.3042	-42.5272	-61.4731	-70.7525	-84.0443
1.46163	0	0	0	0	11.6614	0	-96.147	0	-124.615		-38.7156	-0.0161782	-48.8113	-46.4198	-15.2938	-42.5272	-61.5587	-70.7525	-84.1552
1.46252	0	0	0	0	11.674	0	-92.8888	0	-136.78		-38.7156	-0.0161782	-48.8113	-46.4198	-15.2834	-42.5272	-61.6414	-70.7525	-84.277
1.46341	0	0	0	0	11.7117	0	-90.2219	0	-147.573		-38.7156	-0.0161782	-48.8113	-46.4198	-15.273	-42.5272	-61.7217	-70.7525	-84.4083
1.4643	0	0	0	0	11.6992	0	-88.6494	0	-155.473		-38.7156	-0.0161782	-48.8113	-46.4198	-15.2626	-42.5272	-61.8006	-70.7525	-84.5467
1.4652	0	0	0	0	11.5356	0	-87.3411	0	-163.688		-38.7156	-0.0161782	-48.8113	-46.4198	-15.2523	-42.5272	-61.8783	-70.7525	-84.6923
1.46609	0	0	0	0	11.2463	0	-85.5548	0	-171.864		-38.7156	-0.0161782	-48.8113	-46.4198	-15.2423	-42.5272	-61.9545	-70.7525	-84.8453
1.46697	0	0	0	0	10.8312	0	-84.2214	0	-177.903		-38.7156	-0.0161782	-48.8113	-46.4198	-15.2327	-42.5272	-62.0294	-70.7525	-85.0036
1.46786	0	0	0	0	10.4034	0	-82.8376	0	-187.853		-38.7156	-0.0161782	-48.8113	-46.4198	-15.2234	-42.5272	-62.1031	-70.7525	-85.1708
1.46876	0	0	0	0	10.0764	0	-81.718	0	-199.716		-38.7156	-0.0161782	-48.8113	-46.4198	-15.2144	-42.5272	-62.1759	-70.7525	-85.3486
1.46965	0	0	0	0	9.72414	0	-81.1393	0	-212.421		-38.7156	-0.0161782	-48.8113	-46.4198	-15.2058	-42.5272	-62.2481	-70.7525	-85.5376
1.47054	0	0	0	0	9.4977	0	-80.4097	0	-227.668		-38.7156	-0.0161782	-48.8113	-46.4198	-15.1973	-42.5272	-62.3196	-70.7525	-85.7403
1.47143	0	0	0	0	9.10773	0	-80.0575	0	-246.123		-38.7156	-0.0161782	-48.8113	-46.4198	-15.1892	-42.5272	-62.3909	-70.7525	-85.9593
1.47232	0	0	0	0	8.66744	0	-79.3782	0	-260.124		-38.7156	-0.0161782	-48.8113	-46.4198	-15.1815	-42.5272	-62.4615	-70.7525	-86.1908
1.47321	0	0	0	0	8.06361	0	-79.0385	0	-270.263		-38.7156	-0.0161782	-48.8113	-46.4198	-15.1743	-42.5272	-62.5319	-70.7525	-86.4314
1.4741	0	0	0	0	7.49753	0	-78.0195	0	-275.094		-38.7156	-0.0161782	-48.8113	-46.4198	-15.1677	-42.5272	-62.6013	-70.7525	-86.6762
1.47499	-0.251595	0	0	0	6.65468	0	-78.095	0	-280.327		-38.7158	-0.0161782	-48.8113	-46.4198	-15.1617	-42.5272	-62.6708	-70.7525	-86.9257
1.47588	-0.50319	0	0	0	5.91248	0	-78.0573	0	-285.623		-38.7163	-0.0161782	-48.8113	-46.4198	-15.1565	-42.5272	-62.7403	-70.7525	-87.1799
1.47677	-0.754784	0	0	0	5.0948	0	-78.1328	0	-291.221		-38.7169	-0.0161782	-48.8113	-46.4198	-15.1519	-42.5272	-62.8098	-70.7525	-87.4391
1.47766	-1.25797	0	0	0	4.55387	0	-78.0824	0	-304.052		-38.7181	-0.0161782	-48.8113	-46.4198	-15.1479	-42.5272	-62.8793	-70.7525	-87.7097
1.47855	-1.76116	0	0	0	3.88714	0	-78.1453	0	-316.921		-38.7196	-0.0161782	-48.8113	-46.4198	-15.1444	-42.5272	-62.9489	-70.7525	-87.9917
1.47944	-2.01276	-0.113218	0	0	3.24557	0	-77.6799	0	-327.463		-38.7214	-0.016279	-48.8113	-46.4198	-15.1415	-42.5272	-63.018	-70.7525	-88.2832
1.48033	-2.26435	-0.717045	0	0	2.61659	0	-77.4786	0	-333.501		-38.7234	-0.0169171	-48.8113	-46.4198	-15.1392	-42.5272	-63.087	-70.7525	-88.58
1.48122	-2.51595	-1.71084	0	0	2.1763	0	-77.0886	0	-339.062		-38.7257	-0.0184398	-48.8113	-46.4198	-15.1373	-42.5272	-63.1556	-70.7525	-88.8818
1.48211	-2.52853	-3.25815	0	0	1.64795	0	-76.3968	0	-340.169		-38.7279	-0.0213395	-48.8113	-46.4198	-15.1358	-42.5272	-63.2236	-70.7525	-89.1845
1.483	-2.52853	-5.45961	0	0	1.28313	0	-75.3652	0	-338.647		-38.7302	-0.0261986	-48.8113	-46.4198	-15.1347	-42.5272	-63.2907	-70.7525	-89.4859
1.48389	-2.27693	-7.78686	0	0	1.03154	0	-74.6859	0	-333.049		-38.7322	-0.0331289	-48.8113	-46.4198	-15.1337	-42.5272	-63.3571	-70.7525	-89.7823
1.48478	-2.02534	-9.67382	0	0	0.893162	0	-74.2205	0	-329.564		-38.734	-0.0417386	-48.8113	-46.4198	-15.133	-42.5272	-63.4232	-70.7525	-90.0756
1.48567	-1.52215	-11.2463	0	0	0.717045	0	-73.6418	0	-320.003		-38.7354	-0.0517478	-48.8113	-46.4198	-15.1323	-42.5272	-63.4887	-70.7525	-90.3604
1.48656	-1.00638	-12.3281	0	0	0.440291	0	-72.8115	0	-302.04		-38.7363	-0.0627198	-48.8113	-46.4198	-15.1319	-42.5272	-63.5535	-70.7525	-90.6292
1.48745	-0.50319	-13.1332	0	0	0.301914	0	-73.126	0	-286.441		-38.7367	-0.0744084	-48.8113	-46.4198	-15.1317	-42.5272	-63.6186	-70.7525	-90.8842
1.48834	-0.251595	-14.1145	0	0	0.301914	0	-73.1638	0	-268.955		-38.7369	-0.0869703	-48.8113	-46.4198	-15.1314	-42.5272	-63.6837	-70.7525	-91.1235
1.48923	-0.025159	-15.2466	0	0	0.201276	0	-73.0757	0	-249.079		-38.737	-0.10054	-48.8113	-46.4198	-15.1312	-42.5272	-63.7488	-70.7525	-91.3452
1.49012	-0.025159	-17.0959	0	0	0.138377	0	-73.0505	0	-238.65		-38.737	-0.115755	-48.8113	-46.4198	-15.1311	-42.5272	-63.8138	-70.7525	-91.5576
1.49101	-0.025159	-19.1967	0	0	0.138377	0	-73.5412	0	-231.014		-38.737	-0.13284	-48.8113	-46.4198	-15.131	-42.5272	-63.8792	-70.7525	-91.7632
1.4919	-0.025159	-21.5239	0	0	0.062899	0	-73.3147	0	-225.265		-38.737	-0.151996	-48.8113	-46.4198	-15.1309	-42.5272	-63.9445	-70.7525	-91.9637
1.49279	-0.025159	-24.2789	0	0	0	0	-72.8619	0	-227.014		-38.737	-0.173605	-48.8113	-46.4198	-15.1309	-42.5272	-64.0093	-70.7525	-92.1658
1.49368	0	-27.298	0	0	0	0	-72.3335	0	-229.492		-38.737	-0.1979	-48.8113	-46.4198	-15.1309	-42.5272	-64.0737	-70.7525	-92.37
1.49457	0	-30.7071	0	0	0	0	-72.1574	0	-224.888		-38.737	-0.225229	-48.8113	-46.4198	-15.1309	-42.5272	-64.1379	-70.7525	-92.5702
1.49546	-0.050319	-34.3301	0	0	0	0	-71.8052	0	-223.479		-38.7371	-0.255783	-48.8113	-46.4198	-15.1309	-42.5272	-64.2018	-70.7525	-92.7691
1.49635	-0.075478	-38.3682	0	0	0	0	-70.9875	0	-222.032		-38.7372	-0.289931	-48.8113	-46.4198	-15.1309	-42.5272	-64.265	-70.7525	-92.9667
1.49724	-0.088058	-43.3498	0	0	0	0	-69.9056	0	-217.001		-38.7372	-0.328512	-48.8113	-46.4198	-15.1309	-42.5272	-64.3272	-70.7525	-93.1598
1.49813	-0.088058	-50.4951	0	0	0	0	-69.0879	0	-210.836		-38.7373	-0.373453	-48.8113	-46.4198	-15.1309	-42.5272	-64.3887	-70.7525	-93.3474
1.49902	-0.088058	-60.823	0	0	0	0	-68.1193	0	-208.71		-38.7374	-0.427585	-48.8113	-46.4198	-15.1309	-42.5272	-64.4493	-70.7525	-93.5332
1.49991	-0.037739	-71.7171	0	0	0	0	-67.4022	0	-206.056		-38.7374	-0.491413	-48.8113	-46.4198	-15.1309	-42.5272	-64.5093	-70.7525	-93.7166
1.5008	-0.01258	-89.5426	0	0	0	0	-66.9871	0	-202.71		-38.7374	-0.571106	-48.8113	-46.4198	-15.1309	-42.5272	-64.5689	-70.7525	-93.897
1.50169	0	-117.608	0	0	0	0	-66.5217	0	-198.282		-38.7374	-0.675777	-48.8113	-46.4198	-15.1309	-42.5272	-64.6281	-70.7525	-94.0735
1.50258	0	-142.918	0	0	0	0	-66.1191	0	-195.288		-38.7374	-0.802975	-48.8113	-46.4198	-15.1309	-42.5272	-64.687	-70.7525	-94.2473
1.50347	-0.025159	-148.554	0	0	0	0	-65.3517	0	-190.256		-38.7375	-0.935188	-48.8113	-46.4198	-15.1309	-42.5272	-64.7452	-70.7525	-94.4166
1.50436	-0.050319	-148.089	0	0	0	0	-64.3579	0	-187.048		-38.7375	-1.06699	-48.8113	-46.4198	-15.1309	-42.5272	-64.8024	-70.7525	-94.5831
1.50525	-0.050319	-136.364	0	0	0	0	-64.0435	0	-185.01		-38.7375	-1.18835	-48.8113	-46.4198	-15.1309	-42.5272	-64.8594	-70.7525	-94.7477
1.50614	-0.050319	-109.029	0	0	0	0	-64.0183	0	-183.06		-38.7376	-1.28539	-48.8113	-46.4198	-15.1309	-42.5272	-64.9164	-70.7525	-94.9107
1.50703	-0.050319	-83.064	0	0	0	0	-63.5654	0	-181.261		-38.7376	-1.35931	-48.8113	-46.4198	-15.1309	-42.5272	-64.973	-70.7525	-95.072
1.50792	-0.025159	-72.1196	0	0	0	0	-63.3641	0	-178.305		-38.7377	-1.4235	-48.8113	-46.4198	-15.1309	-42.5272	-65.0294	-70.7525	-95.2307
1.50881	0	-62.9364	0	0	0	0	-63.4396	0	-174.821		-38.7377	-1.47951	-48.8113	-46.4198	-15.1309	-42.5272	-65.0858	-70.7525	-95.3863
1.5097	0	-59.5902	0	0	0	0	-62.9742	0	-171.55		-38.7377	-1.53255	-48.8113	-46.4198	-15.1309	-42.5272	-65.1419	-70.7525	-95.5389
1.51059	0	-59.3512	0	0	0	0	-63.1503	0	-168.908		-38.7377	-1.58537	-48.8113	-46.4198	-15.1309	-42.5272	-65.1981	-70.7525	-95.6893
1.51148	0	-58.7474	0	0	0.01258	0	-62.949	0	-166.493		-38.7377	-1.63766	-48.8113	-46.4198	-15.1309	-42.5272	-65.2541	-70.7525	-95.8374
1.51237	0	-56.7598	0	0	0.01258	0	-62.861	0	-165.7		-38.7377	-1.68817	-48.8113	-46.4198	-15.1309	-42.5272	-65.3101	-70.7525	-95.9849
1.51326	0	-60.0557	0	0	0.01258	0	-62.6848	0	-164.04		-38.7377	-1.74162	-48.8113	-46.4198	-15.1309	-42.5272	-65.3658	-70.7525	-96.1309
1.51415	-0.01258	-63.2132	0	0	0.01258	0	-62.5213	0	-163.184		-38.7377	-1.79788	-48.8113	-46.4198	-15.1309	-42.5272	-65.4215	-70.7525	-96.2761
1.51504	-0.01258	-64.1189	0	0	0.01258	0	-61.8923	0	-162.052		-38.7377	-1.85495	-48.8113	-46.4198	-15.1308	-42.5272	-65.4766	-70.7525	-96.4204
1.51593	-0.01258	-74.0443	0	0	0	0	-61.6533	0	-160.48		-38.7377	-1.92085	-48.8113	-46.4198	-15.1308	-42.5272	-65.5314	-70.7525	-96.5632
1.51682	-0.01258	-79.0637	0	0	-0.251595	0	-61.0998	0	-157.763		-38.7377	-1.99121	-48.8113	-46.4198	-15.1311	-42.5272	-65.5858	-70.7525	-96.7036
1.51771	-0.01258	-78.9756	0	0	-0.50319	0	-60.4708	0	-156.505		-38.7377	-2.0615	-48.8113	-46.4198	-15.1315	-42.5272	-65.6396	-70.7525	-96.8429
1.5186	0	-80.5732	0	0	-0.754784	0	-59.8544	0	-152.869		-38.7377	-2.13321	-48.8113	-46.4198	-15.1322	-42.5272	-65.6929	-70.7525	-96.979
1.51949	0	-80.4978	0	0	-0.754784	0	-59.3764	0	-150.114		-38.7377	-2.20486	-48.8113	-46.4198	-15.1329	-42.5272	-65.7458	-70.7525	-97.1126
1.52039	0	-70.5346	0	0	-1.00638	0	-59.0116	0	-145.95		-38.7377	-2.26763	-48.8113	-46.4198	-15.1338	-42.5272	-65.7983	-70.7525	-97.2424
1.52127	0	-63.0748	0	0	-1.00638	0	-58.9612	0	-143.321		-38.7377	-2.32377	-48.8113	-46.4198	-15.1347	-42.5272	-65.8508	-70.7525	-97.37
1.52216	0	-57.9171	0	0	-1.00638	0	-58.999	0	-138.541		-38.7377	-2.37531	-48.8113	-46.4198	-15.1355	-42.5272	-65.9033	-70.7525	-97.4933
1.52306	0	-50.0674	0	0	-1.00638	0	-59.1625	0	-135.786		-38.7377	-2.41987	-48.8113	-46.4198	-15.1364	-42.5272	-65.9559	-70.7525	-97.6142
1.52395	0	-50.6838	0	0	-1.25797	0	-59.5651	0	-132.653		-38.7377	-2.46498	-48.8113	-46.4198	-15.1376	-42.5272	-66.0089	-70.7525	-97.7322
1.52483	0	-52.3695	0	0	-1.50957	0	-59.6154	0	-129.282		-38.7377	-2.51159	-48.8113	-46.4198	-15.1389	-42.5272	-66.062	-70.7525	-97.8473
1.52572	0	-59.1248	0	0	-1.76116	0	-59.5776	0	-126.049		-38.7377	-2.56421	-48.8113	-46.4198	-15.1405	-42.5272	-66.115	-70.7525	-97.9595
1.52662	0	-68.9873	0	0	-2.01276	0	-59.7538	0	-124.565		-38.7377	-2.62561	-48.8113	-46.4198	-15.1423	-42.5272	-66.1682	-70.7525	-98.0703
1.52751	-0.037739	-82.7621	0	0	-2.26435	0	-60.0054	0	-122.049		-38.7377	-2.69927	-48.8113	-46.4198	-15.1443	-42.5272	-66.2216	-70.7525	-98.1789
1.5284	-0.138377	-102.877	0	0	-2.51595	0	-59.9047	0	-120.879		-38.7379	-2.79083	-48.8113	-46.4198	-15.1465	-42.5272	-66.2749	-70.7525	-98.2865
1.52929	-0.138377	-133.32	0	0	-2.51595	0	-60.1312	0.239015	-121.344		-38.738	-2.90949	-48.8113	-46.4198	-15.1488	-42.5272	-66.3284	-70.7523	-98.3945
1.53018	-0.138377	-169.726	0	0	-2.51595	0	-60.5085	2.06308	-120.401		-38.7381	-3.06054	-48.8113	-46.4198	-15.151	-42.5272	-66.3823	-70.7505	-98.5017
1.53107	-0.138377	-201.993	0	0	-2.51595	0	-60.584	4.37775	-120.162		-38.7382	-3.24031	-48.8113	-46.4198	-15.1532	-42.5272	-66.4362	-70.7466	-98.6086
1.53196	-0.100638	-232.801	0	0	-2.26435	0	-60.4331	6.74274	-120.023		-38.7383	-3.44751	-48.8113	-46.4198	-15.1553	-42.5272	-66.49	-70.7406	-98.7154
1.53285	0	-245.745	0	0	-2.01276	0	-60.3702	9.12031	-117.331		-38.7383	-3.66622	-48.8113	-46.4198	-15.157	-42.5272	-66.5437	-70.7325	-98.8199
1.53374	-0.025159	-252.614	0	0	-1.76116	0	-60.2444	11.3092	-114.249		-38.7384	-3.89105	-48.8113	-46.4198	-15.1586	-42.5272	-66.5973	-70.7224	-98.9216
1.53463	-0.037739	-249.293	0	0	-1.25797	0	-59.8921	12.0262	-112.803		-38.7384	-4.11292	-48.8113	-46.4198	-15.1597	-42.5272	-66.6506	-70.7117	-99.0219
1.53552	-0.037739	-248.639	0	0	-0.754784	0	-59.3009	12.4791	-109.972		-38.7384	-4.33421	-48.8113	-46.4198	-15.1604	-42.5272	-66.7034	-70.7006	-99.1198
1.53641	-0.301914	-244.663	0	0	-0.50319	0	-58.9487	12.9697	-107.217		-38.7387	-4.55196	-48.8113	-46.4198	-15.1609	-42.5272	-66.7559	-70.689	-99.2152
1.5373	-0.616407	-246.89	0	0	-0.251595	0	-58.4203	13.7119	-106.349		-38.7392	-4.77169	-48.8113	-46.4198	-15.1611	-42.5272	-66.8079	-70.6768	-99.3099
1.53819	-1.39635	-242.122	0	0	0	0	-57.9926	14.2528	-106.563		-38.7405	-4.98718	-48.8113	-46.4198	-15.1611	-42.5272	-66.8595	-70.6642	-99.4047
1.53908	-2.39015	-238.763	0	0	0	0	-57.8416	14.5673	-105.456		-38.7426	-5.19968	-48.8113	-46.4198	-15.1611	-42.5272	-66.911	-70.6512	-99.4986
1.53997	-3.37137	-232.901	0	0	0	0	-57.4642	14.6428	-105.192		-38.7456	-5.40696	-48.8113	-46.4198	-15.1611	-42.5272	-66.9621	-70.6382	-99.5922
1.54086	-4.13873	-226.448	0	0	0	0	-57.3259	14.6806	-104.751		-38.7493	-5.6085	-48.8113	-46.4198	-15.1611	-42.5272	-67.0131	-70.6251	-99.6854
1.54175	-4.7803	-218.648	0	0	0	0	-57.1749	14.3661	-104.336		-38.7535	-5.80309	-48.8113	-46.4198	-15.1611	-42.5272	-67.064	-70.6123	-99.7783
1.54264	-4.02552	-209.314	0	0	0	0	-56.8604	14.1019	-102.89		-38.7571	-5.98938	-48.8113	-46.4198	-15.1611	-42.5272	-67.1146	-70.5998	-99.8699
1.54353	-3.01914	-197.892	0	0	0	0	-56.4453	13.8503	-102.865		-38.7598	-6.16551	-48.8113	-46.4198	-15.1611	-42.5272	-67.1649	-70.5874	-99.9614
1.54442	-2.03792	-191.728	0	0	0	0	-56.3698	13.5106	-102.865		-38.7616	-6.33615	-48.8113	-46.4198	-15.1611	-42.5272	-67.215	-70.5754	-100.053
1.54531	-1.00638	-187.01	0	0	0	0	-55.9547	13.0703	-102.877		-38.7625	-6.50258	-48.8113	-46.4198	-15.1611	-42.5272	-67.2648	-70.5638	-100.145
1.5462	-0.050319	-184.268	0	0	0	0	-56.1056	12.6804	-103.229		-38.7626	-6.66658	-48.8113	-46.4198	-15.1611	-42.5272	-67.3148	-70.5525	-100.236
1.54709	0	-184.671	0	0	0	0	-56.4453	12.391	-103.544		-38.7626	-6.83094	-48.8113	-46.4198	-15.1611	-42.5272	-67.365	-70.5415	-100.329
1.54798	0	-189.086	0	0	0	0	-56.2063	12.2275	-102.978		-38.7626	-6.99923	-48.8113	-46.4198	-15.1611	-42.5272	-67.415	-70.5306	-100.42
1.54887	0	-187.576	0	0	0	0	-56.0302	12.1269	-103.053		-38.7626	-7.16617	-48.8113	-46.4198	-15.1611	-42.5272	-67.4649	-70.5198	-100.512
1.54976	0	-186.067	0	0	0	0	-55.9169	12.0891	-103.166		-38.7626	-7.33177	-48.8113	-46.4198	-15.1611	-42.5272	-67.5147	-70.509	-100.604
1.55065	0	-175.814	0	0	0	0	-55.2628	12.0891	-102.877		-38.7626	-7.48824	-48.8113	-46.4198	-15.1611	-42.5272	-67.5638	-70.4983	-100.695
1.55154	0	-166.581	0	0	0	0	-54.4829	12.0765	-103.116		-38.7626	-7.6365	-48.8113	-46.4198	-15.1611	-42.5272	-67.6123	-70.4875	-100.787
1.55243	0	-160.052	0	0	0	0	-54.3696	12.0388	-103.179		-38.7626	-7.77895	-48.8113	-46.4198	-15.1611	-42.5272	-67.6607	-70.4768	-100.879
1.55332	-0.025159	-155.599	0	0	0	0	-54.2564	12.0514	-102.877		-38.7626	-7.91743	-48.8113	-46.4198	-15.1611	-42.5272	-67.709	-70.4661	-100.97
1.55421	-0.025159	-152.731	0	0	0	0	-54.0803	12.0262	-102.5		-38.7626	-8.05336	-48.8113	-46.4198	-15.1611	-42.5272	-67.7571	-70.4554	-101.062
1.5551	-0.050319	-153.687	0	0	0	0	-53.6148	11.9885	-102.374		-38.7627	-8.19014	-48.8113	-46.4198	-15.1611	-42.5272	-67.8049	-70.4447	-101.153
1.55599	-0.062899	-151.498	0	0	0	0	-53.0991	11.9759	-101.934		-38.7627	-8.32497	-48.8113	-46.4198	-15.1611	-42.5272	-67.8521	-70.434	-101.244
1.55688	-0.062899	-144.68	0	0	0	0	-52.6462	11.9256	-101.242		-38.7628	-8.45374	-48.8113	-46.4198	-15.1611	-42.5272	-67.899	-70.4234	-101.334
1.55777	-0.037739	-138.755	0	0	0	0	-52.9859	11.8753	-100.21		-38.7628	-8.57723	-48.8113	-46.4198	-15.1611	-42.5272	-67.9461	-70.4129	-101.423
1.55866	-0.037739	-129.622	0	0	0	0	-53.0865	11.8627	-98.6503		-38.7628	-8.69259	-48.8113	-46.4198	-15.1611	-42.5272	-67.9934	-70.4023	-101.511
1.55955	-0.01258	-127.559	0	0	0	0	-53.3255	11.7998	-96.9772		-38.7628	-8.80612	-48.8113	-46.4198	-15.1611	-42.5272	-68.0408	-70.3918	-101.597
1.56044	0	-123.52	0	0	0	0	-53.7406	11.6866	-95.3418		-38.7628	-8.91605	-48.8113	-46.4198	-15.1611	-42.5272	-68.0887	-70.3814	-101.682
1.56133	0	-127.974	0	0	0	0	-54.2061	11.674	-94.3103		-38.7628	-9.02995	-48.8113	-46.4198	-15.1611	-42.5272	-68.1369	-70.371	-101.766
1.56222	0	-129.911	0	0	0	0	-53.6903	11.6363	-93.9581		-38.7628	-9.14557	-48.8113	-46.4198	-15.1611	-42.5272	-68.1847	-70.3607	-101.849
1.56311	-0.251595	-128.427	0	0	0	0	-53.3633	11.4979	-93.2662		-38.7631	-9.25987	-48.8113	-46.4198	-15.1611	-42.5272	-68.2322	-70.3504	-101.932
1.564	-0.50319	-125.143	0	0	0	0	-53.2626	11.2714	-92.9894		-38.7635	-9.37125	-48.8113	-46.4198	-15.1611	-42.5272	-68.2796	-70.3404	-102.015
1.56489	-0.754784	-121.306	0	0	0	0	-53.0613	10.9318	-93.0398		-38.7642	-9.47921	-48.8113	-46.4198	-15.1611	-42.5272	-68.3268	-70.3307	-102.098
1.56578	-1.00638	-110.022	0	0	0	0	-52.6085	10.0009	-92.6246		-38.7651	-9.57713	-48.8113	-46.4198	-15.1611	-42.5272	-68.3736	-70.3218	-102.18
1.56667	-1.00638	-104.928	0	0	0	0	-52.382	8.70518	-92.2095		-38.766	-9.67052	-48.8113	-46.4198	-15.1611	-42.5272	-68.4203	-70.314	-102.262
1.56756	-0.754784	-101.141	0	0	0	0	-52.2562	7.23335	-92.5617		-38.7667	-9.76053	-48.8113	-46.4198	-15.1611	-42.5272	-68.4668	-70.3076	-102.345
1.56845	-0.528349	-94.9141	0	0	0	0	-52.3066	5.7112	-91.4799		-38.7671	-9.84501	-48.8113	-46.4198	-15.1611	-42.5272	-68.5133	-70.3025	-102.426
1.56934	-0.314493	-94.9141	0	0	0	0	-52.7468	3.95004	-89.9955		-38.7674	-9.92948	-48.8113	-46.4198	-15.1611	-42.5272	-68.5603	-70.299	-102.506
1.57023	-0.062899	-98.7635	0	0	0	0	-52.3569	2.59143	-88.1462		-38.7675	-10.0174	-48.8113	-46.4198	-15.1611	-42.5272	-68.6069	-70.2967	-102.585
1.57112	-0.075478	-99.6693	0	0	0	0	-52.0172	1.55989	-85.819		-38.7675	-10.1061	-48.8113	-46.4198	-15.1611	-42.5272	-68.6532	-70.2953	-102.661
1.57201	-0.100638	-98.7887	0	0	0	0	-51.6776	0.805103	-83.3534		-38.7676	-10.194	-48.8113	-46.4198	-15.1611	-42.5272	-68.6991	-70.2946	-102.735
1.5729	-0.075478	-99.4303	0	0	0	0	-51.6273	0.239015	-81.3406		-38.7677	-10.2825	-48.8113	-46.4198	-15.1611	-42.5272	-68.7451	-70.2944	-102.808
1.57379	-0.037739	-101.871	0	0	0	0	-51.0486	0.100638	-80.0197		-38.7677	-10.3732	-48.8113	-46.4198	-15.1611	-42.5272	-68.7905	-70.2943	-102.879
1.57468	-0.037739	-96.147	0	0	0	0	-51.1492	0.125797	-81.3658		-38.7678	-10.4587	-48.8113	-46.4198	-15.1611	-42.5272	-68.836	-70.2942	-102.951
1.57557	-0.025159	-92.0208	0	0	0	0	-51.2247	0.239015	-87.5172		-38.7678	-10.5406	-48.8113	-46.4198	-15.1611	-42.5272	-68.8816	-70.2939	-103.029
1.57646	0	-90.5615	0	0	0	0	-51.4511	0.377392	-100.084		-38.7678	-10.6212	-48.8113	-46.4198	-15.1611	-42.5272	-68.9274	-70.2936	-103.118
1.57735	0	-89.9577	0	0	0	0.075478	-50.9605	1.01896	-117.457		-38.7678	-10.7013	-48.8113	-46.4198	-15.1611	-42.5271	-68.9728	-70.2927	-103.223
1.57824	0	-86.6618	0	0	0	1.61021	-50.3819	2.7927	-139.711		-38.7678	-10.7784	-48.8113	-46.4198	-15.1611	-42.5257	-69.0176	-70.2902	-103.347
1.57913	0	-87.9324	0	0	0	3.71102	-50.3567	4.91868	-165.663		-38.7678	-10.8567	-48.8113	-46.4198	-15.1611	-42.5224	-69.0624	-70.2858	-103.495
1.58003	0	-86.4857	0	0	0	5.93764	-50.0548	7.13271	-190.633		-38.7678	-10.9337	-48.8113	-46.4198	-15.1611	-42.5171	-69.107	-70.2795	-103.664
1.58092	0	-86.8883	0	0	0	8.26489	-49.8032	8.91903	-215.441		-38.7678	-11.011	-48.8113	-46.4198	-15.1611	-42.5097	-69.1513	-70.2716	-103.856
1.5818	0	-88.3727	0	0	0	10.5796	-49.8661	9.58576	-237.153		-38.7678	-11.0896	-48.8113	-46.4198	-15.1611	-42.5003	-69.1957	-70.263	-104.067
1.58269	-0.025159	-89.8068	0	0	0	11.5105	-49.8661	8.90646	-258.212		-38.7678	-11.1696	-48.8113	-46.4198	-15.1611	-42.4901	-69.2401	-70.2551	-104.297
1.58359	-0.025159	-89.769	0	0	0	11.9508	-49.7906	8.18941	-279.635		-38.7678	-11.2495	-48.8113	-46.4198	-15.1611	-42.4794	-69.2844	-70.2478	-104.546
1.58448	-0.025159	-90.9641	0	0	0	12.3156	-49.5642	7.78686	-298.517		-38.7678	-11.3304	-48.8113	-46.4198	-15.1611	-42.4685	-69.3285	-70.2409	-104.811
1.58537	-0.025159	-91.3541	0	0	0	12.5546	-49.2623	8.23973	-315.047		-38.7679	-11.4117	-48.8113	-46.4198	-15.1611	-42.4573	-69.3723	-70.2335	-105.092
1.58626	-0.025159	-90.1716	0	0	0	12.8439	-49.0484	10.8941	-333.237		-38.7679	-11.492	-48.8113	-46.4198	-15.1611	-42.4459	-69.416	-70.2238	-105.388
1.58715	0	-88.0204	0	0	0	13.0703	-49.0987	15.8756	-345.804		-38.7679	-11.5703	-48.8113	-46.4198	-15.1611	-42.4342	-69.4597	-70.2097	-105.696
1.58804	0	-86.9008	0	0	0	13.0578	-49.2245	22.6939	-353.038		-38.7679	-11.6477	-48.8113	-46.4198	-15.1611	-42.4226	-69.5035	-70.1895	-106.01
1.58893	0	-84.5358	0	0	0	12.9949	-50.4322	30.7826	-362.385		-38.7679	-11.7229	-48.8113	-46.4198	-15.1611	-42.411	-69.5484	-70.1621	-106.333
1.58982	0	-82.3344	0	0	0	12.9949	-50.8599	40.1042	-376.876		-38.7679	-11.7962	-48.8113	-46.4198	-15.1611	-42.3995	-69.5937	-70.1264	-106.668
1.59071	0	-81.0513	0	0	0	12.8439	-51.1366	49.2874	-382.374		-38.7679	-11.8683	-48.8113	-46.4198	-15.1611	-42.388	-69.6392	-70.0826	-107.009
1.5916	0	-79.6801	0	0	0	12.6301	-51.5392	56.8982	-392.048		-38.7679	-11.9392	-48.8113	-46.4198	-15.1611	-42.3768	-69.685	-70.0319	-107.358
1.59249	0	-79.8059	0	0	0	12.5043	-51.3505	63.1	-401.935		-38.7679	-12.0103	-48.8113	-46.4198	-15.1611	-42.3657	-69.7307	-69.9758	-107.715
1.59338	0	-80.85	0	0	0	12.3281	-50.4322	69.0628	-412.452		-38.7679	-12.0822	-48.8113	-46.4198	-15.1611	-42.3547	-69.7756	-69.9143	-108.082
1.59427	0	-81.1645	0	0	0	12.1772	-49.8912	73.8682	-410.754		-38.7679	-12.1544	-48.8113	-46.4198	-15.1611	-42.3439	-69.82	-69.8486	-108.448
1.59516	-0.01258	-80.8122	0	0	0	12.064	-49.3755	76.2081	-410.741		-38.7679	-12.2264	-48.8113	-46.4198	-15.1611	-42.3331	-69.864	-69.7807	-108.814
1.59605	-0.01258	-80.9506	0	0	0	11.9885	-49.2748	78.3592	-409.458		-38.7679	-12.2984	-48.8113	-46.4198	-15.1611	-42.3225	-69.9078	-69.711	-109.178
1.59694	-0.01258	-80.1707	0	0	0	11.9885	-49.3629	80.3594	-403.457		-38.7679	-12.3698	-48.8113	-46.4198	-15.1611	-42.3118	-69.9518	-69.6395	-109.537
1.59783	-0.01258	-78.8246	0	0	0	12.0388	-49.3126	80.6864	-385.456		-38.7679	-12.4399	-48.8113	-46.4198	-15.1611	-42.3011	-69.9956	-69.5677	-109.88
1.59872	-0.01258	-78.2082	0	0	0	12.0262	-49.5264	79.7681	-374.901		-38.7679	-12.5095	-48.8113	-46.4198	-15.1611	-42.2904	-70.0397	-69.4967	-110.214
1.59961	0	-77.7931	0	0	0	11.9633	-49.9038	78.6485	-363.215		-38.7679	-12.5788	-48.8113	-46.4198	-15.1611	-42.2797	-70.0841	-69.4267	-110.537
1.6005	0	-76.4345	0	0	0	11.8375	-49.5516	76.6735	-352.421		-38.7679	-12.6468	-48.8113	-46.4198	-15.1611	-42.2692	-70.1282	-69.3584	-110.851
1.60139	0	-76.3464	0	0	0	11.674	-49.3126	73.1134	-332.193		-38.7679	-12.7147	-48.8113	-46.4198	-15.1611	-42.2588	-70.1721	-69.2934	-111.146
1.60228	0	-75.6671	0	0	0	11.5985	-49.1994	69.9308	-307.939		-38.7679	-12.7821	-48.8113	-46.4198	-15.1611	-42.2485	-70.2159	-69.2311	-111.42
1.60317	0	-74.4972	0	0	0	11.4853	-49.3	67.4651	-277.408		-38.7679	-12.8484	-48.8113	-46.4198	-15.1611	-42.2382	-70.2598	-69.1711	-111.667
1.60406	0	-73.1134	0	0	0	11.4098	-49.1239	65.8675	-252.111		-38.7679	-12.9135	-48.8113	-46.4198	-15.1611	-42.2281	-70.3035	-69.1125	-111.892
1.60495	0	-72.9373	0	0	0	11.4476	-49.3755	63.9554	-223.844		-38.7679	-12.9784	-48.8113	-46.4198	-15.1611	-42.2179	-70.3475	-69.0555	-112.091
1.60584	0	-71.5284	0	0	0	11.3847	-49.6648	62.1942	-204.094		-38.7679	-13.042	-48.8113	-46.4198	-15.1611	-42.2078	-70.3917	-69.0002	-112.273
1.60673	0	-70.0817	0	0	0	11.0324	-50.1554	59.7663	-192.508		-38.7679	-13.1044	-48.8113	-46.4198	-15.1611	-42.198	-70.4363	-68.947	-112.444
1.60762	0	-68.9999	0	0	0	10.6676	-50.6964	57.2504	-184.029		-38.7679	-13.1658	-48.8113	-46.4198	-15.1611	-42.1885	-70.4814	-68.896	-112.608
1.60851	0	-68.2325	0	0	0	10.2776	-51.0486	54.7596	-170.078		-38.7679	-13.2265	-48.8113	-46.4198	-15.1611	-42.1793	-70.5269	-68.8473	-112.759
1.6094	0	-68.1696	0	0	0	9.77446	-51.2624	52.5204	-152.794		-38.7679	-13.2872	-48.8113	-46.4198	-15.1611	-42.1706	-70.5725	-68.8006	-112.895
1.61029	0	-66.7607	0	0	0	9.34675	-51.4008	50.8473	-142.554		-38.7679	-13.3466	-48.8113	-46.4198	-15.1611	-42.1623	-70.6182	-68.7553	-113.022
1.61118	0	-67.0123	0	0	0	8.99451	-51.0863	49.2497	-132.578		-38.7679	-13.4063	-48.8113	-46.4198	-15.1611	-42.1543	-70.6637	-68.7115	-113.14
1.61207	0	-67.1003	0	0	0	8.42843	-50.7341	47.4382	-120.64		-38.7679	-13.466	-48.8113	-46.4198	-15.1611	-42.1468	-70.7088	-68.6693	-113.247
1.61296	0	-66.8991	0	0	0	7.53526	-50.6083	45.8532	-112.953		-38.7679	-13.5255	-48.8113	-46.4198	-15.1611	-42.1401	-70.7539	-68.6284	-113.348
1.61385	0	-66.9871	0	0	0	6.18923	-50.3693	44.6203	-108.387		-38.7679	-13.5851	-48.8113	-46.4198	-15.1611	-42.1346	-70.7987	-68.5887	-113.444
1.61474	0	-67.7167	0	0	0	4.67966	-49.9793	43.4378	-100.399		-38.7679	-13.6454	-48.8113	-46.4198	-15.1611	-42.1304	-70.8432	-68.5501	-113.534
1.61563	0	-67.2764	0	0	0	3.06946	-49.6397	42.1799	-94.5242		-38.7679	-13.7053	-48.8113	-46.4198	-15.1611	-42.1277	-70.8874	-68.5125	-113.618
1.61652	0	-67.0123	0	0	0	1.71084	-49.4132	41.1483	-89.1149		-38.7679	-13.7649	-48.8113	-46.4198	-15.1611	-42.1262	-70.9314	-68.4759	-113.697
1.61741	0	-67.9558	0	0	0	0.754784	-49.149	39.7897	-84.6742		-38.7679	-13.8254	-48.8113	-46.4198	-15.1611	-42.1255	-70.9751	-68.4405	-113.772
1.6183	0	-67.0878	0	0	0	0.339653	-48.822	38.5066	-80.3342		-38.7679	-13.8851	-48.8113	-46.4198	-15.1611	-42.1252	-71.0185	-68.4062	-113.844
1.61919	0	-67.5909	0	0	0	0.113218	-48.6459	37.1228	-76.4219		-38.7679	-13.9453	-48.8113	-46.4198	-15.1611	-42.1251	-71.0618	-68.3732	-113.912
1.62008	0	-66.7355	0	0	0	0.138377	-48.583	36.0032	-73.3399		-38.7679	-14.0047	-48.8113	-46.4198	-15.1611	-42.125	-71.1051	-68.3411	-113.977
1.62097	0	-66.6475	0	0	0	0.213856	-48.0672	34.8333	-70.283		-38.7679	-14.064	-48.8113	-46.4198	-15.1611	-42.1248	-71.1479	-68.3101	-114.04
1.62186	0	-65.3769	0	0	0	0.213856	-47.7527	33.9905	-67.2261		-38.7679	-14.1222	-48.8113	-46.4198	-15.1611	-42.1246	-71.1904	-68.2799	-114.1
1.62275	0	-65.314	0	0	0	0.251595	-47.3376	32.9463	-63.5654		-38.7679	-14.1803	-48.8113	-46.4198	-15.1611	-42.1243	-71.2325	-68.2506	-114.156
1.62364	-0.037739	-64.8737	0	0	0	1.03154	-46.7463	31.9903	-59.4644		-38.768	-14.238	-48.8113	-46.4198	-15.1611	-42.1234	-71.2741	-68.2221	-114.209
1.62453	-0.037739	-66.4965	0	0	0	2.76754	-46.5073	31.1223	-55.0993		-38.768	-14.2972	-48.8113	-46.4198	-15.1611	-42.121	-71.3155	-68.1944	-114.258
1.62542	-0.050319	-67.4274	0	0	0	4.8432	-46.5576	30.0278	-50.4573		-38.7681	-14.3572	-48.8113	-46.4198	-15.1611	-42.1167	-71.3569	-68.1677	-114.303
1.62631	-0.050319	-68.1822	0	0	0	6.7679	-46.7463	28.9082	-45.2619		-38.7681	-14.4179	-48.8113	-46.4198	-15.1611	-42.1106	-71.3985	-68.1419	-114.343
1.6272	-0.050319	-67.9683	0	0	0	8.11393	-47.1992	27.9648	-40.0413		-38.7681	-14.4784	-48.8113	-46.4198	-15.1611	-42.1034	-71.4405	-68.1171	-114.379
1.62809	-0.01258	-67.5909	0	0	0	8.46617	-47.6395	27.0339	-35.3742		-38.7682	-14.5386	-48.8113	-46.4198	-15.1611	-42.0959	-71.4829	-68.093	-114.41
1.62898	-0.01258	-66.2449	0	0	0	7.93782	-47.6898	26.1281	-31.9148		-38.7682	-14.5975	-48.8113	-46.4198	-15.1611	-42.0888	-71.5254	-68.0697	-114.439
1.62987	0	-65.1505	0	0	0	7.13271	-47.6772	25.4866	-29.2353		-38.7682	-14.6555	-48.8113	-46.4198	-15.1611	-42.0825	-71.5678	-68.0471	-114.465
1.63076	0	-65.5279	0	0	0	6.56662	-47.4256	24.9079	-27.4616		-38.7682	-14.7138	-48.8113	-46.4198	-15.1611	-42.0766	-71.61	-68.0249	-114.489
1.63165	0	-64.2699	0	0	0	6.45341	-47.1237	24.3041	-26.4678		-38.7682	-14.771	-48.8113	-46.4198	-15.1611	-42.0709	-71.652	-68.0033	-114.513
1.63254	0	-63.1755	0	0	0	6.47857	-47.1363	23.826	-25.6627		-38.7682	-14.8272	-48.8113	-46.4198	-15.1611	-42.0651	-71.6939	-67.9821	-114.536
1.63343	0	-61.9552	0	0	0	6.17665	-47.2369	23.3606	-24.694		-38.7682	-14.8824	-48.8113	-46.4198	-15.1611	-42.0596	-71.7359	-67.9613	-114.558
1.63432	0	-60.7727	0	0	0	5.7112	-47.2621	22.9203	-23.977		-38.7682	-14.9365	-48.8113	-46.4198	-15.1611	-42.0545	-71.778	-67.9409	-114.579
1.63522	0	-59.3512	0	0	0	5.32123	-47.2621	22.2913	-23.5744		-38.7682	-14.9893	-48.8113	-46.4198	-15.1611	-42.0498	-71.8201	-67.921	-114.6
1.6361	0	-60.4708	0	0	0	5.54767	-47.2747	21.5239	-23.2851		-38.7682	-15.0431	-48.8113	-46.4198	-15.1611	-42.0449	-71.8622	-67.9019	-114.621
1.63699	0	-61.5527	0	0	0	6.50373	-46.9098	20.6559	-23.0964		-38.7682	-15.0979	-48.8113	-46.4198	-15.1611	-42.0391	-71.9039	-67.8835	-114.641
1.63789	0	-62.6094	0	0	0	7.92524	-46.8595	19.6747	-23.0712		-38.7682	-15.1536	-48.8113	-46.4198	-15.1611	-42.032	-71.9456	-67.866	-114.662
1.63878	-0.01258	-63.8422	0	0	0	11.0953	-46.5702	18.3413	-22.87		-38.7682	-15.2104	-48.8113	-46.4198	-15.1611	-42.0221	-71.9871	-67.8496	-114.682
1.63966	-0.01258	-64.0686	0	0	0	15.6366	-46.3438	17.0707	-22.5052		-38.7682	-15.2675	-48.8113	-46.4198	-15.1611	-42.0082	-72.0283	-67.8345	-114.702
1.64055	-0.01258	-63.8044	0	0	0	21.0459	-46.1299	15.9008	-22.3416		-38.7682	-15.3242	-48.8113	-46.4198	-15.1611	-41.9895	-72.0694	-67.8203	-114.722
1.64145	-0.01258	-63.8296	0	0	0	27.21	-45.9664	14.7812	-22.1781		-38.7682	-15.3811	-48.8113	-46.4198	-15.1611	-41.9653	-72.1103	-67.8072	-114.742
1.64234	-0.01258	-63.1629	0	0	0	33.9401	-45.8154	13.9006	-21.7504		-38.7682	-15.4373	-48.8113	-46.4198	-15.1611	-41.9351	-72.151	-67.7948	-114.761
1.64323	0	-62.7603	0	0	0	39.8526	-45.8532	13.2842	-21.2849		-38.7682	-15.4931	-48.8113	-46.4198	-15.1611	-41.8996	-72.1918	-67.783	-114.78
1.64412	0	-61.7665	0	0	0	44.5197	-45.7022	12.8062	-20.832		-38.7682	-15.5481	-48.8113	-46.4198	-15.1611	-41.86	-72.2325	-67.7716	-114.799
1.64501	0	-61.8168	0	0	0	48.4572	-45.4758	12.542	-20.1527		-38.7682	-15.6031	-48.8113	-46.4198	-15.1611	-41.8169	-72.273	-67.7604	-114.817
1.6459	0	-61.1753	0	0	0	51.5518	-45.2242	12.3659	-19.1715		-38.7682	-15.6576	-48.8113	-46.4198	-15.1611	-41.771	-72.3132	-67.7494	-114.834
1.64679	0	-60.9111	0	0	0	53.8287	-44.8971	12.1646	-18.0142		-38.7682	-15.7118	-48.8113	-46.4198	-15.1611	-41.7231	-72.3532	-67.7386	-114.85
1.64768	0	-59.8041	0	0	0	55.3383	-44.8216	12.0891	-16.8191		-38.7682	-15.765	-48.8113	-46.4198	-15.1611	-41.6738	-72.3931	-67.7278	-114.865
1.64857	0	-59.9928	0	0	0	55.8037	-44.7587	12.0765	-15.5234		-38.7682	-15.8184	-48.8113	-46.4198	-15.1611	-41.6241	-72.4329	-67.7171	-114.878
1.64946	0	-58.9738	0	0	0	56.1308	-44.9222	12.0011	-14.1899		-38.7682	-15.8709	-48.8113	-46.4198	-15.1611	-41.5742	-72.4729	-67.7064	-114.891
1.65035	0	-58.4706	0	-0.025159	0	55.4767	-45.0606	11.9633	-13.1207		-38.7682	-15.9229	-48.8113	-46.4198	-15.1611	-41.5248	-72.513	-67.6957	-114.903
1.65124	0	-57.7536	0	-0.201276	0	54.9609	-45.2619	11.825	-12.4414		-38.7682	-15.9743	-48.8113	-46.42	-15.1611	-41.4759	-72.5533	-67.6852	-114.914
1.65213	0	-57.3762	0	-0.842843	0	53.8539	-45.2116	11.7495	-11.9885		-38.7682	-16.0254	-48.8113	-46.4207	-15.1611	-41.428	-72.5935	-67.6747	-114.924
1.65302	0	-57.0994	0	-2.07566	0	52.7846	-45.2619	11.5356	-11.7495		-38.7682	-16.0762	-48.8113	-46.4226	-15.1611	-41.381	-72.6338	-67.6645	-114.935
1.65391	0	-56.3698	0	-3.81166	0	50.9605	-45.1361	11.4098	-11.7117		-38.7682	-16.1264	-48.8113	-46.426	-15.1611	-41.3356	-72.674	-67.6543	-114.945
1.6548	0	-55.0238	0	-5.7741	0	49.3126	-45.1361	11.196	-11.6992		-38.7682	-16.1753	-48.8113	-46.4311	-15.1611	-41.2917	-72.7142	-67.6444	-114.956
1.65569	0	-54.0803	0	-7.58558	0	46.9853	-44.7336	11.0828	-11.6992		-38.7682	-16.2235	-48.8113	-46.4379	-15.1611	-41.2499	-72.754	-67.6345	-114.966
1.65658	0	-53.8035	0	-8.95678	0	44.5197	-44.4568	10.7305	-11.7117		-38.7682	-16.2714	-48.8113	-46.4458	-15.1611	-41.2103	-72.7935	-67.6249	-114.977
1.65747	0	-52.3191	0	-9.86252	0	42.8214	-44.331	10.4538	-11.6111		-38.7682	-16.3179	-48.8113	-46.4546	-15.1611	-41.1722	-72.833	-67.6156	-114.987
1.65836	0	-52.055	0	-10.3154	0	40.8213	-44.1549	10.1896	-11.4601		-38.7682	-16.3643	-48.8113	-46.4638	-15.1611	-41.1359	-72.8723	-67.6066	-114.997
1.65925	0	-51.8411	0	-10.4034	0	38.8462	-43.9033	9.79962	-11.3092		-38.7682	-16.4104	-48.8113	-46.473	-15.1611	-41.1013	-72.9114	-67.5979	-115.007
1.66014	0	-52.0298	0	-10.6425	0	37.1354	-43.8907	9.27127	-11.1456		-38.7682	-16.4567	-48.8113	-46.4825	-15.1611	-41.0682	-72.9504	-67.5896	-115.017
1.66103	0	-51.9166	0	-10.8689	0	35.8774	-43.8027	8.76808	-11.045		-38.7682	-16.5029	-48.8113	-46.4922	-15.1611	-41.0363	-72.9894	-67.5818	-115.027
1.66192	0	-52.5833	0	-10.957	0	34.3049	-43.5888	8.35295	-11.0324		-38.7682	-16.5497	-48.8113	-46.5019	-15.1611	-41.0058	-73.0282	-67.5744	-115.037
1.66281	0	-52.0172	0	-10.9821	0	33.1854	-43.224	7.58558	-11.1582		-38.7682	-16.596	-48.8113	-46.5117	-15.1611	-40.9762	-73.0667	-67.5676	-115.047
1.6637	0	-53.1746	0	-11.0073	0	32.267	-43.2366	6.75532	-11.3092		-38.7682	-16.6433	-48.8113	-46.5215	-15.1611	-40.9475	-73.1052	-67.5616	-115.057
1.66459	0	-52.9481	0	-10.806	0	31.399	-43.1233	5.98796	-11.3469		-38.7682	-16.6904	-48.8113	-46.5311	-15.1611	-40.9196	-73.1435	-67.5563	-115.067
1.66548	0	-52.5959	0	-10.5544	0	30.682	-43.2743	5.34639	-11.4098		-38.7682	-16.7373	-48.8113	-46.5405	-15.1611	-40.8923	-73.1821	-67.5515	-115.077
1.66637	0	-52.5204	0	-10.1896	0	30.1662	-43.4001	4.34001	-11.5105		-38.7682	-16.784	-48.8113	-46.5496	-15.1611	-40.8654	-73.2207	-67.5476	-115.087
1.66726	0	-52.8726	0	-9.5606	0	29.6882	-43.6014	3.40911	-11.4476		-38.7682	-16.8311	-48.8113	-46.5581	-15.1611	-40.839	-73.2595	-67.5446	-115.097
1.66815	0	-52.2059	0	-8.40327	0	29.2102	-43.5133	2.55369	-11.3595		-38.7682	-16.8775	-48.8113	-46.5656	-15.1611	-40.813	-73.2982	-67.5423	-115.108
1.66904	-0.025159	-52.7091	0	-6.94402	0	28.8202	-43.4378	1.72342	-11.4224		-38.7682	-16.9244	-48.8113	-46.5718	-15.1611	-40.7874	-73.3369	-67.5408	-115.118
1.66993	-0.062899	-52.6588	0	-5.10737	0	28.3547	-43.1611	0.930901	-11.4476		-38.7683	-16.9713	-48.8113	-46.5763	-15.1611	-40.7621	-73.3753	-67.54	-115.128
1.67082	-0.088058	-52.382	0	-3.24557	0	27.9773	-42.9724	0.46545	-11.3469		-38.7684	-17.0179	-48.8113	-46.5792	-15.1611	-40.7372	-73.4135	-67.5396	-115.138
1.67171	-0.088058	-52.772	0	-1.66053	0	27.4364	-42.9472	0.226435	-11.3343		-38.7685	-17.0649	-48.8113	-46.5807	-15.1611	-40.7128	-73.4518	-67.5394	-115.148
1.6726	-0.088058	-52.0801	0	-0.717045	0	26.82	-43.073	0.163537	-11.3092		-38.7685	-17.1112	-48.8113	-46.5813	-15.1611	-40.6889	-73.4901	-67.5392	-115.158
1.67349	-0.062899	-51.1366	0	-0.150957	0	26.1784	-42.7711	0.125797	-11.1456		-38.7686	-17.1567	-48.8113	-46.5814	-15.1611	-40.6656	-73.5282	-67.5391	-115.168
1.67438	-0.025159	-51.1115	0	0	0	25.5495	-42.5573	0.088058	-10.8815		-38.7686	-17.2022	-48.8113	-46.5814	-15.1611	-40.6429	-73.566	-67.539	-115.178
1.67527	0	-51.1115	0	0.427711	0	24.8576	-42.4692	0.062899	-10.8186		-38.7686	-17.2477	-48.8113	-46.5811	-15.1611	-40.6208	-73.6038	-67.539	-115.187
1.67616	0	-50.1303	0	1.32087	0	24.1531	-42.2931	0.025159	-10.7683		-38.7686	-17.2923	-48.8113	-46.5799	-15.1611	-40.5993	-73.6415	-67.539	-115.197
1.67705	0	-50.0925	0	2.62917	0	23.499	-42.0541	0	-10.6676		-38.7686	-17.3369	-48.8113	-46.5775	-15.1611	-40.5784	-73.6789	-67.539	-115.206
1.67794	0	-50.1932	0	4.101	0	22.958	-42.5447	0	-10.6299		-38.7686	-17.3816	-48.8113	-46.5739	-15.1611	-40.5579	-73.7168	-67.539	-115.216
1.67883	0	-49.5642	0	5.59798	0	22.3794	-42.7711	0	-10.6299		-38.7686	-17.4257	-48.8113	-46.5689	-15.1611	-40.538	-73.7548	-67.539	-115.225
1.67972	0	-49.6648	0	6.46599	0	21.8133	-42.8969	0	-10.6299		-38.7686	-17.4699	-48.8113	-46.5632	-15.1611	-40.5186	-73.793	-67.539	-115.235
1.68061	0	-49.778	0	6.35277	0	21.2975	-42.9347	0	-10.6173		-38.7686	-17.5142	-48.8113	-46.5575	-15.1611	-40.4996	-73.8312	-67.539	-115.244
1.6815	0	-50.5454	0	5.49735	0	20.9075	-42.985	0	-10.7305		-38.7686	-17.5592	-48.8113	-46.5526	-15.1611	-40.481	-73.8695	-67.539	-115.254
1.68239	0	-50.5831	0	4.32743	0	20.5176	-42.6956	0	-10.7934		-38.7686	-17.6042	-48.8113	-46.5488	-15.1611	-40.4628	-73.9075	-67.539	-115.263
1.68328	0	-51.3379	0	2.9185	0	19.9515	-42.595	0	-10.9066		-38.7686	-17.6499	-48.8113	-46.5462	-15.1611	-40.445	-73.9454	-67.539	-115.273
1.68417	-0.01258	-50.3441	0	1.62279	0	19.1212	-42.5824	0	-10.9444		-38.7686	-17.6947	-48.8113	-46.5447	-15.1611	-40.428	-73.9833	-67.539	-115.283
1.68506	-0.075478	-49.149	0	0.842843	0	18.2658	-42.4818	0	-10.9947		-38.7687	-17.7385	-48.8113	-46.544	-15.1611	-40.4117	-74.0211	-67.539	-115.293
1.68595	-0.163537	-47.7527	0	0.389972	0	17.033	-42.4944	0	-10.8815		-38.7688	-17.781	-48.8113	-46.5436	-15.1611	-40.3966	-74.0589	-67.539	-115.302
1.68684	-0.251595	-46.8847	0	0.088058	0	15.297	-42.1295	0	-10.8437		-38.7691	-17.8227	-48.8113	-46.5435	-15.1611	-40.383	-74.0964	-67.539	-115.312
1.68773	-0.352233	-45.3248	0	0	0	13.7371	-41.7522	0	-10.8437		-38.7694	-17.863	-48.8113	-46.5435	-15.1611	-40.3707	-74.1336	-67.539	-115.322
1.68862	-0.452871	-44.8719	0	0	0	12.7936	-41.3496	0	-10.8815		-38.7698	-17.903	-48.8113	-46.5435	-15.1611	-40.3594	-74.1704	-67.539	-115.331
1.68951	-0.427711	-44.8594	0	0	0	11.9759	-41.1483	0	-10.806		-38.7702	-17.9429	-48.8113	-46.5435	-15.1611	-40.3487	-74.207	-67.539	-115.341
1.6904	-0.389972	-44.4442	0	0	0	11.5608	-40.8842	0	-10.8941		-38.7705	-17.9824	-48.8113	-46.5435	-15.1611	-40.3384	-74.2434	-67.539	-115.351
1.69129	-0.339653	-44.5323	0	0	0	11.7243	-41.01	0	-10.9444		-38.7708	-18.0221	-48.8113	-46.5435	-15.1611	-40.328	-74.2799	-67.539	-115.36
1.69218	-0.289334	-44.9097	0	0	0	12.0137	-41.1861	0	-10.9192		-38.7711	-18.062	-48.8113	-46.5435	-15.1611	-40.3173	-74.3165	-67.539	-115.37
1.69308	-0.226435	-44.7084	0	0	0	12.0137	-41.4125	0	-10.7305		-38.7713	-18.1018	-48.8113	-46.5435	-15.1611	-40.3066	-74.3534	-67.539	-115.38
1.69396	-0.239015	-45.2619	0	0	0	12.064	-41.7522	0	-10.6173		-38.7715	-18.1421	-48.8113	-46.5435	-15.1611	-40.2959	-74.3905	-67.539	-115.389
1.69486	-0.226435	-45.5135	0	0	0	12.064	-42.0415	0	-10.4538		-38.7717	-18.1826	-48.8113	-46.5435	-15.1611	-40.2851	-74.428	-67.539	-115.398
1.69575	-0.213856	-45.5764	0	0	0	11.913	-42.117	0	-10.3154		-38.7719	-18.2232	-48.8113	-46.5435	-15.1611	-40.2745	-74.4654	-67.539	-115.408
1.69663	-0.163537	-45.6519	0	0	0	11.8879	-42.0163	0	-10.1644		-38.772	-18.2638	-48.8113	-46.5435	-15.1611	-40.2639	-74.5028	-67.539	-115.417
1.69752	-0.113218	-46.306	0	0	0	11.825	-41.6767	0	-10.2147		-38.7721	-18.305	-48.8113	-46.5435	-15.1611	-40.2534	-74.5399	-67.539	-115.426
1.69842	-0.062899	-45.7903	0	0	0	11.6614	-41.4754	0	-10.2525		-38.7722	-18.3458	-48.8113	-46.5435	-15.1611	-40.243	-74.5768	-67.539	-115.435
1.69931	-0.025159	-45.9538	0	0	0	11.5105	-41.4628	0	-10.3531		-38.7722	-18.3867	-48.8113	-46.5435	-15.1611	-40.2328	-74.6138	-67.539	-115.444
1.7002	0	-46.067	0	0	0	11.435	-41.2112	0	-10.4412		-38.7722	-18.4277	-48.8113	-46.5435	-15.1611	-40.2226	-74.6504	-67.539	-115.453
1.70109	0	-45.8783	0	0	0	11.1834	-40.7584	0	-10.5796		-38.7722	-18.4685	-48.8113	-46.5435	-15.1611	-40.2127	-74.6867	-67.539	-115.463
1.70198	0	-45.1361	0	0	0	10.9947	-40.0665	0	-10.7054		-38.7722	-18.5087	-48.8113	-46.5435	-15.1611	-40.2029	-74.7224	-67.539	-115.472
1.70287	0	-45.6645	0	0	0	10.9947	-38.8714	0	-10.9444		-38.7722	-18.5493	-48.8113	-46.5435	-15.1611	-40.1931	-74.757	-67.539	-115.482
1.70376	0	-45.048	0	0	0	10.5544	-37.2234	0	-11.0953		-38.7722	-18.5894	-48.8113	-46.5435	-15.1611	-40.1837	-74.7901	-67.539	-115.492
1.70465	0	-45.0229	0	0	0	10.0512	-36.1793	0	-11.2714		-38.7722	-18.6295	-48.8113	-46.5435	-15.1611	-40.1748	-74.8223	-67.539	-115.502
1.70554	0	-44.9977	0	0	0	9.84994	-36.28	0	-11.4853		-38.7722	-18.6695	-48.8113	-46.5435	-15.1611	-40.166	-74.8546	-67.539	-115.512
1.70643	0	-44.6707	0	0	0	9.4977	-38.9091	0	-11.6488		-38.7722	-18.7093	-48.8113	-46.5435	-15.1611	-40.1575	-74.8892	-67.539	-115.523
1.70732	0	-43.7272	0	0	0	9.03225	-45.9915	0	-11.7243		-38.7722	-18.7482	-48.8113	-46.5435	-15.1611	-40.1495	-74.9301	-67.539	-115.533
1.70821	0	-44.0165	0	0	0	8.8184	-59.955	0	-11.8124		-38.7722	-18.7874	-48.8113	-46.5435	-15.1611	-40.1416	-74.9835	-67.539	-115.544
1.7091	0	-43.224	0	0	0	8.68002	-78.334	0	-11.913		-38.7722	-18.8259	-48.8113	-46.5435	-15.1611	-40.1339	-75.0532	-67.539	-115.554
1.70999	0	-42.7082	0	0	0	8.02587	-104.085	0	-11.9885		-38.7722	-18.8639	-48.8113	-46.5435	-15.1611	-40.1268	-75.1458	-67.539	-115.565
1.71088	0	-43.5385	0	0	0	7.6359	-134.238	0	-11.9885		-38.7722	-18.9026	-48.8113	-46.5435	-15.1611	-40.12	-75.2653	-67.539	-115.575
1.71177	0	-44.1423	0	0	0	7.04465	-163.537	0	-12.1646		-38.7722	-18.9419	-48.8113	-46.5435	-15.1611	-40.1137	-75.4109	-67.539	-115.586
1.71266	0	-44.1297	0	0	0	6.32761	-192.055	0	-12.4917		-38.7722	-18.9812	-48.8113	-46.5435	-15.1611	-40.1081	-75.5818	-67.539	-115.597
1.71355	0	-44.0291	0	0	0	5.50993	-222.926	0	-13.0578		-38.7722	-19.0204	-48.8113	-46.5435	-15.1611	-40.1032	-75.7802	-67.539	-115.609
1.71444	0	-44.5197	0	0	0	4.93126	-251.104	0	-13.5484		-38.7722	-19.06	-48.8113	-46.5435	-15.1611	-40.0988	-76.0037	-67.539	-115.621
1.71533	0	-43.9913	0	0	0	4.26453	-271.005	0	-14.2906		-38.7722	-19.0991	-48.8113	-46.5435	-15.1611	-40.095	-76.2449	-67.539	-115.634
1.71622	0	-43.5762	0	0	0	3.39653	-292.492	0	-14.9322		-38.7722	-19.1379	-48.8113	-46.5435	-15.1611	-40.092	-76.5052	-67.539	-115.647
1.71711	0	-42.9347	0	0	0	2.60401	-310.367	0	-15.6115		-38.7722	-19.1761	-48.8113	-46.5435	-15.1611	-40.0896	-76.7814	-67.539	-115.661
1.718	0	-42.9598	0	0	0	1.93728	-326.834	0	-16.1021		-38.7722	-19.2144	-48.8113	-46.5435	-15.1611	-40.0879	-77.0723	-67.539	-115.675
1.71889	0	-42.1924	0	0	0	1.23281	-344.219	0.01258	-16.794		-38.7722	-19.2519	-48.8113	-46.5435	-15.1611	-40.0868	-77.3787	-67.5389	-115.69
1.71978	0	-42.0541	0	0	0	0.47803	-359.793	0.01258	-17.3223		-38.7722	-19.2893	-48.8113	-46.5435	-15.1611	-40.0864	-77.6989	-67.5389	-115.706
1.72067	0	-42.4189	0	0	0	0.188696	-364.875	0.01258	-17.8129		-38.7722	-19.3271	-48.8113	-46.5435	-15.1611	-40.0862	-78.0236	-67.5389	-115.722
1.72156	0	-42.4566	0	0	0	0.100638	-374.927	0.01258	-18.1274		-38.7722	-19.3649	-48.8113	-46.5435	-15.1611	-40.0861	-78.3573	-67.5389	-115.738
1.72245	0	-42.5069	0	0	0	0.037739	-383.544	0.01258	-18.4545		-38.7722	-19.4027	-48.8113	-46.5435	-15.1611	-40.0861	-78.6987	-67.5389	-115.754
1.72334	0	-43.5007	0	0	0	0.113218	-387.846	0	-18.5551		-38.7722	-19.4414	-48.8113	-46.5435	-15.1611	-40.086	-79.0438	-67.5389	-115.771
1.72423	0	-43.2366	0	0	0	0.113218	-405.055	0	-18.4419		-38.7722	-19.4799	-48.8113	-46.5435	-15.1611	-40.0859	-79.4043	-67.5389	-115.787
1.72512	0	-42.6327	0	0	0	0.075478	-425.157	0	-18.228		-38.7722	-19.5179	-48.8113	-46.5435	-15.1611	-40.0858	-79.7827	-67.5389	-115.803
1.72601	0	-42.6831	0	0	0	0.075478	-440.857	0	-17.662		-38.7722	-19.5558	-48.8113	-46.5435	-15.1611	-40.0858	-80.1751	-67.5389	-115.819
1.7269	0	-42.9598	0	0	0	0.075478	-448.329	0	-16.5801		-38.7722	-19.5941	-48.8113	-46.5435	-15.1611	-40.0857	-80.5741	-67.5389	-115.834
1.72779	0	-42.0666	0	0	0	0	-440.417	0	-15.3724		-38.7722	-19.6315	-48.8113	-46.5435	-15.1611	-40.0857	-80.9661	-67.5389	-115.847
1.72868	0	-42.2302	0	0	0	0	-428.164	0	-14.2403		-38.7722	-19.6691	-48.8113	-46.5435	-15.1611	-40.0857	-81.3471	-67.5389	-115.86
1.72957	0	-42.1799	0	0	0	0	-410.968	0.037739	-13.1081		-38.7722	-19.7066	-48.8113	-46.5435	-15.1611	-40.0857	-81.7129	-67.5389	-115.872
1.73046	0	-42.0415	0	0	0	0	-394.891	0.188696	-12.2904		-38.7722	-19.7441	-48.8113	-46.5435	-15.1611	-40.0857	-82.0644	-67.5387	-115.883
1.73135	0	-41.7647	0	0	0	0	-378.776	1.57247	-11.674		-38.7722	-19.7812	-48.8113	-46.5435	-15.1611	-40.0857	-82.4015	-67.5373	-115.893
1.73224	0	-41.8276	0	0	0	0	-365.781	3.74876	-10.3657		-38.7722	-19.8185	-48.8113	-46.5435	-15.1611	-40.0857	-82.727	-67.534	-115.902
1.73313	0	-41.7396	0	0	0	0	-345.264	5.98796	-7.93782		-38.7722	-19.8556	-48.8113	-46.5435	-15.1611	-40.0857	-83.0343	-67.5286	-115.909
1.73402	0	-41.6389	0	0	0	0	-332.646	8.32779	-5.5854		-38.7722	-19.8927	-48.8113	-46.5435	-15.1611	-40.0857	-83.3303	-67.5212	-115.914
1.73491	0	-41.7144	0	0	0	0	-312.443	10.5921	-3.27073		-38.7722	-19.9298	-48.8113	-46.5435	-15.1611	-40.0857	-83.6084	-67.5118	-115.917
1.7358	0	-41.6515	0	0	0	0	-294.668	11.6614	-1.19508		-38.7722	-19.9669	-48.8113	-46.5435	-15.1611	-40.0857	-83.8707	-67.5014	-115.918
1.73669	0	-41.576	0	0	0	0	-280.201	11.9508	0		-38.7722	-20.0039	-48.8113	-46.5435	-15.1611	-40.0857	-84.1201	-67.4908	-115.918
1.73758	0	-41.4251	0	0	0	0	-264.615	12.2023	0		-38.7722	-20.0407	-48.8113	-46.5435	-15.1611	-40.0857	-84.3556	-67.4799	-115.918
1.73847	0	-41.4251	0	0	0	0	-243.909	12.3659	0		-38.7722	-20.0776	-48.8113	-46.5435	-15.1611	-40.0857	-84.5726	-67.4689	-115.918
1.73936	0	-41.4377	0	0	0	0	-218.221	12.391	0		-38.7722	-20.1145	-48.8113	-46.5435	-15.1611	-40.0857	-84.7669	-67.4579	-115.918
1.74025	0	-41.1106	0	0	0	0	-193.829	12.3156	0		-38.7722	-20.1511	-48.8113	-46.5435	-15.1611	-40.0857	-84.9394	-67.4469	-115.918
1.74114	0	-41.337	0	0	0	0	-173.059	12.2527	0		-38.7722	-20.1879	-48.8113	-46.5435	-15.1611	-40.0857	-85.0934	-67.436	-115.918
1.74203	0	-41.7647	0	0	0	0	-156.404	12.0388	0		-38.7722	-20.225	-48.8113	-46.5435	-15.1611	-40.0857	-85.2326	-67.4253	-115.918
1.74292	0	-41.9786	0	0	0	0	-142.201	11.6614	0		-38.7722	-20.2624	-48.8113	-46.5435	-15.1611	-40.0857	-85.3591	-67.4149	-115.918
1.74381	0	-42.1547	0	0	0	0	-133.182	11.4098	0		-38.7722	-20.2999	-48.8113	-46.5435	-15.1611	-40.0857	-85.4777	-67.4048	-115.918
1.7447	0	-43.2366	0	0	0	0	-123.495	11.2463	0		-38.7722	-20.3384	-48.8113	-46.5435	-15.1611	-40.0857	-85.5876	-67.3948	-115.918
1.74559	0	-42.6831	0	0	0	0	-115.105	11.0199	0		-38.7722	-20.3764	-48.8113	-46.5435	-15.1611	-40.0857	-85.69	-67.385	-115.918
1.74648	0	-42.9472	0	0	0	0	-103.67	10.5167	0		-38.7722	-20.4146	-48.8113	-46.5435	-15.1611	-40.0857	-85.7823	-67.3756	-115.918
1.74737	0	-42.6202	0	0	0	0	-91.7063	9.52286	0		-38.7722	-20.4525	-48.8113	-46.5435	-15.1611	-40.0857	-85.8639	-67.3671	-115.918
1.74826	0	-41.8402	0	0	0	0	-80.5229	7.64848	0		-38.7722	-20.4898	-48.8113	-46.5435	-15.1611	-40.0857	-85.9356	-67.3603	-115.918
1.74915	0	-40.6703	0	0	0	0	-67.5155	5.48477	0		-38.7722	-20.526	-48.8113	-46.5435	-15.1611	-40.0857	-85.9957	-67.3554	-115.918
1.75005	0	-40.5571	0	0	0	0	-53.4639	3.34621	0		-38.7722	-20.5621	-48.8113	-46.5435	-15.1611	-40.0857	-86.0433	-67.3524	-115.918
1.75093	0	-39.9281	0	0	0	0	-39.3243	1.54731	-0.01258		-38.7722	-20.5976	-48.8113	-46.5435	-15.1611	-40.0857	-86.0783	-67.3511	-115.918
1.75182	0	-39.9533	0	0	0	0	-26.4175	0.352233	-0.01258		-38.7722	-20.6332	-48.8113	-46.5435	-15.1611	-40.0857	-86.1018	-67.3508	-115.918
1.75272	0	-40.1419	0	0	0	0	-17.5991	-0.050319	-0.01258		-38.7722	-20.6689	-48.8113	-46.5435	-15.1611	-40.0857	-86.1174	-67.3508	-115.918
1.75361	0	-40.4942	0	0	0	0	-12.3407	-0.264175	-0.050319		-38.7722	-20.7049	-48.8113	-46.5435	-15.1611	-40.0857	-86.1284	-67.351	-115.918
1.75449	0	-40.5697	0	0	0	0	-11.9633	-0.691886	-0.050319		-38.7722	-20.741	-48.8113	-46.5435	-15.1611	-40.0857	-86.1391	-67.3517	-115.918
1.75538	0	-40.2174	0	0	0	0	-13.9635	-2.6669	-0.037739		-38.7722	-20.7768	-48.8113	-46.5435	-15.1611	-40.0857	-86.1515	-67.354	-115.918
1.75628	0	-40.4942	0	0	0	0	-17.2091	-4.95642	-0.037739		-38.7722	-20.8129	-48.8113	-46.5435	-15.1611	-40.0857	-86.1668	-67.3584	-115.918
1.75717	0	-40.1923	0	0	0	0	-19.1841	-7.68622	-0.037739		-38.7722	-20.8486	-48.8113	-46.5435	-15.1611	-40.0857	-86.1839	-67.3653	-115.919
1.75806	0	-39.5633	0	0	0	0	-21.0836	-12.1269	-0.01258		-38.7722	-20.8838	-48.8113	-46.5435	-15.1611	-40.0857	-86.2026	-67.3761	-115.919
1.75895	0	-39.3243	0	0	0	0	-21.1214	-17.6871	-0.075478		-38.7722	-20.9188	-48.8113	-46.5435	-15.1611	-40.0857	-86.2214	-67.3918	-115.919
1.75984	0	-39.3746	0	0	0	0	-21.4988	-23.9644	-0.100638		-38.7722	-20.9539	-48.8113	-46.5435	-15.1611	-40.0857	-86.2406	-67.4131	-115.919
1.76073	0	-39.2236	0	0	0	0	-22.4171	-33.2357	-0.138377		-38.7722	-20.9888	-48.8113	-46.5435	-15.1611	-40.0857	-86.2605	-67.4427	-115.919
1.76162	0	-39.362	0	0	0	0	-23.348	-47.6646	-0.163537		-38.7722	-21.0238	-48.8113	-46.5435	-15.1611	-40.0857	-86.2813	-67.4851	-115.919
1.76251	0	-39.2488	0	0	0	0	-23.9896	-67.6916	-0.150957		-38.7722	-21.0588	-48.8113	-46.5435	-15.1611	-40.0857	-86.3027	-67.5454	-115.919
1.7634	0	-39.0978	0	0	0	0	-24.694	-98.2981	-0.088058		-38.7722	-21.0936	-48.8113	-46.5435	-15.1611	-40.0857	-86.3246	-67.6329	-115.919
1.76429	0	-39.0601	0	0	0	0	-25.2727	-135.849	-0.062899		-38.7722	-21.1283	-48.8113	-46.5435	-15.1611	-40.0857	-86.3471	-67.7538	-115.919
1.76518	0	-38.494	0	0	0	0	-25.5117	-180.393	-0.050319		-38.7722	-21.1626	-48.8113	-46.5435	-15.1611	-40.0857	-86.3698	-67.9143	-115.919
1.76607	0	-38.7079	0	0	0	0	-25.3733	-222.41	-0.025159		-38.7722	-21.197	-48.8113	-46.5435	-15.1611	-40.0857	-86.3924	-68.1123	-115.919
1.76696	0	-39.1104	0	0	0	0	-24.8827	-264.011	-0.025159		-38.7722	-21.2318	-48.8113	-46.5435	-15.1611	-40.0857	-86.4146	-68.3472	-115.919
1.76785	0	-38.8966	0	0	0	0	-24.216	-297.8	-0.025159		-38.7722	-21.2665	-48.8113	-46.5435	-15.1611	-40.0857	-86.4361	-68.6123	-115.919
1.76874	0	-38.8714	0	0	0	0	-23.2348	-327.866	-0.025159		-38.7722	-21.301	-48.8113	-46.5435	-15.1611	-40.0857	-86.4568	-68.9041	-115.919
1.76963	0	-38.5821	0	0	0	0	-21.9391	-344.861	0.01258		-38.7722	-21.3354	-48.8113	-46.5435	-15.1611	-40.0857	-86.4763	-69.211	-115.919
1.77052	0	-38.0915	0	0	0	0	-20.266	-354.258	1.0567		-38.7722	-21.3693	-48.8113	-46.5435	-15.1611	-40.0857	-86.4944	-69.5263	-115.918
1.77141	0	-37.1354	0	0	0	0	-18.1777	-360.963	3.05688		-38.7722	-21.4023	-48.8113	-46.5435	-15.1611	-40.0857	-86.5105	-69.8476	-115.916
1.7723	0	-36.9215	0	0	0	0	-16.0392	-359.818	5.28349		-38.7722	-21.4352	-48.8113	-46.5435	-15.1611	-40.0857	-86.5248	-70.1678	-115.911
1.77319	0	-36.4561	0	0	0	0	-14.1396	-356.422	7.61074		-38.7722	-21.4676	-48.8113	-46.5435	-15.1611	-40.0857	-86.5374	-70.485	-115.904
1.77408	0	-36.3051	0	0	0	0	-12.7307	-355.805	9.96315		-38.7722	-21.5	-48.8113	-46.5435	-15.1611	-40.0857	-86.5487	-70.8017	-115.895
1.77497	0	-36.5819	0	0	0	0	-11.6866	-352.409	11.3343		-38.7722	-21.5325	-48.8113	-46.5435	-15.1611	-40.0857	-86.5591	-71.1153	-115.885
1.77586	0	-36.7454	0	0	0	0	-11.0953	-351.755	11.6866		-38.7722	-21.5652	-48.8113	-46.5435	-15.1611	-40.0857	-86.569	-71.4284	-115.875
1.77675	0	-37.2989	0	0	0	0	-10.3909	-358.699	11.8501		-38.7722	-21.5984	-48.8113	-46.5435	-15.1611	-40.0857	-86.5782	-71.7476	-115.864
1.77764	0	-37.3744	0	0	0	0	-9.09515	-365.806	11.9004		-38.7722	-21.6317	-48.8113	-46.5435	-15.1611	-40.0857	-86.5863	-72.0732	-115.854
[truncated: 2,801 more rows]

## Sheet: fwd
	vmean										Integral(vmean)
Time [s]	1	2	3	4	5	6	7	8	9												Freq	T	T Zeile
0	-378.21	-366.385	-372.423	-369.215	-368.02	-371.291	-1.82406	-17.5487	17.8632		-0.336607	-0.326083	-0.331457	-0.328602	-0.327538	-0.330449	-0.00162342	-0.0156184	0.0158983		0.265	3.77358	4239.98
0.00089	-326.545	-307.361	-318.167	-319.525	-323.236	-331.489	-1.45925	-14.039	24.6437		-0.627232	-0.599634	-0.614625	-0.612979	-0.615218	-0.625474	-0.00292215	-0.0281131	0.0378312		0.3	3.33333	3745.32
0.00178	-266.64	-238.336	-254.438	-258.124	-267.357	-285.132	-1.09444	-10.5292	31.7638		-0.864541	-0.811752	-0.841075	-0.842709	-0.853166	-0.879242	-0.0038962	-0.0374841	0.066101		0.34	2.94118	3304.69
0.00267	-198.219	-165.059	-185.463	-191.69	-204.219	-233.732	-0.729625	-7.0195	39.1356		-1.04096	-0.958655	-1.00614	-1.01331	-1.03492	-1.08726	-0.00454556	-0.0437315	0.100932		0.4	2.5	2808.99
0.003561	-123.03	-91.7818	-111.658	-119.608	-136.44	-173.185	-0.364812	-3.50975	46.9602		-1.15045	-1.04034	-1.10551	-1.11976	-1.15635	-1.2414	-0.00487025	-0.0468551	0.142726		0.475	2.10526	2365.46
0.004451	-47.3879	-18.5048	-37.8524	-45.7651	-67.5155	-105.921	0	0	55.3886		-1.19263	-1.05681	-1.1392	-1.1605	-1.21644	-1.33567	-0.00487025	-0.0468551	0.192022		0.6	1.66667	1872.66
0.005341	-23.4361	-4.25195	-18.2029	-21.612	-39.9658	-73.2392	0	0	57.4391		-1.21349	-1.06059	-1.1554	-1.17973	-1.25201	-1.40085	-0.00487025	-0.0468551	0.243143		0.8	1.25	1404.49
0.006231	-7.7617	0	-7.71138	-9.17063	-22.241	-47.0608	0	0.50319	59.6657		-1.22039	-1.06059	-1.16226	-1.18789	-1.27181	-1.44273	-0.00487025	-0.0464073	0.296245		1.2	0.833333	936.33
0.007121	-0.616407	0	-2.45305	-1.76116	-11.7746	-25.9017	0	2.36499	61.9175		-1.22094	-1.06059	-1.16445	-1.18946	-1.28229	-1.46579	-0.00487025	-0.0443024	0.351352		2.4	0.416667	468.165
0.008011	-0.251595	0	-2.02534	0	-5.95022	-13.8126	0	4.67966	64.4963		-1.22117	-1.06059	-1.16625	-1.18946	-1.28758	-1.47808	-0.00487025	-0.0401375	0.408754
0.008902	-0.352233	0	-1.59763	0	-1.27055	-8.36553	0	7.00692	66.9116		-1.22148	-1.06059	-1.16767	-1.18946	-1.28871	-1.48553	-0.00487025	-0.0339014	0.468305		Speed	Max	Min	Mean	Q
0.009792	-0.427711	0	-1.27055	0	0	-7.98813	0	9.42222	69.3898		-1.22186	-1.06059	-1.1688	-1.18946	-1.28871	-1.49264	-0.00487025	-0.0255156	0.530062		1	-0.8	-1.3	0.1325	0.01855
0.010682	-0.46545	0	-1.25797	0	0	-7.92524	0	11.3469	72.1951		-1.22228	-1.06059	-1.16992	-1.18946	-1.28871	-1.49969	-0.00487025	-0.0154168	0.594316		2	-4.2	-1	-0.96	-0.1344
0.011572	-0.440291	0	-1.25797	0	0	-7.73654	0	11.9256	75.3023		-1.22267	-1.06059	-1.17104	-1.18946	-1.28871	-1.50657	-0.00487025	-0.00480307	0.661335		3	-5.8	-5.3	-0.17	-0.0238
0.012462	-0.352233	0	-1.25797	0	-0.050319	-8.15167	0	12.1394	78.5479		-1.22298	-1.06059	-1.17216	-1.18946	-1.28876	-1.51383	-0.00487025	0.00600104	0.731242		4	-8.9	-7.8	-0.44	-0.0616
0.013352	-0.251595	0	-1.25797	0	-0.113218	-8.91903	0	12.391	83.1143		-1.2232	-1.06059	-1.17328	-1.18946	-1.28886	-1.52177	-0.00487025	0.0170291	0.805214		5	-8.7	-8.1	-0.285	-0.0399
0.014242	-0.150957	0	-1.25797	0	-0.188696	-9.14547	0	12.5923	90.5741		-1.22334	-1.06059	-1.1744	-1.18946	-1.28903	-1.52991	-0.00487025	0.0282362	0.885825		6			0	0
0.015133	-0.050319	0	-1.25797	0	-0.251595	-8.78066	0	12.693	99.468		-1.22338	-1.06059	-1.17552	-1.18946	-1.28925	-1.53772	-0.00487025	0.039533	0.974352		7	21	-8.4	23.52	3.2928
0.016023	0	0	-1.25797	0	-0.301914	-8.96935	0	12.781	108.978		-1.22338	-1.06059	-1.17664	-1.18946	-1.28952	-1.5457	-0.00487025	0.0509081	1.07134		8	35.8	11.3	29.4	4.116
0.016913	0	0	-1.25797	0	-0.276754	-8.44101	0	12.7307	117.533		-1.22338	-1.06059	-1.17776	-1.18946	-1.28976	-1.55322	-0.00487025	0.0622384	1.17595		9	43	21.2	52.32	7.3248
0.017803	0	0	-1.25797	0	-0.213856	-7.30883	0	12.6301	123.709		-1.22338	-1.06059	-1.17888	-1.18946	-1.28995	-1.55972	-0.00487025	0.0734791	1.28605
0.018693	0	0	-1.25797	0	-0.138377	-6.54146	0	12.6301	126.741		-1.22338	-1.06059	-1.18	-1.18946	-1.29008	-1.56554	-0.00487025	0.0847199	1.39885		b:	1
0.019583	0	0	-1.25797	0	-0.100638	-6.15149	0	12.9949	129.873		-1.22338	-1.06059	-1.18112	-1.18946	-1.29017	-1.57102	-0.00487025	0.0962853	1.51443		h:	0.25
0.020474	0	0	-1.25797	0	-0.088058	-5.00674	0	13.649	132.175		-1.22338	-1.06059	-1.18224	-1.18946	-1.29025	-1.57547	-0.00487025	0.108433	1.63207		Vmean/Vmax:	0.56
0.021364	0	0	-1.25797	0	-0.100638	-4.34001	0	14.6428	136.868		-1.22338	-1.06059	-1.18336	-1.18946	-1.29034	-1.57934	-0.00487025	0.121465	1.75388		(aus SimX)
0.022254	0	0	-1.25797	0	-0.138377	-4.22679	0	15.2844	143.95		-1.22338	-1.06059	-1.18448	-1.18946	-1.29046	-1.5831	-0.00487025	0.135068	1.882
0.023144	0	0	-1.25797	0	-0.176116	-4.36517	0	15.5863	152.353		-1.22338	-1.06059	-1.1856	-1.18946	-1.29062	-1.58698	-0.00487025	0.14894	2.01759
0.024034	0	0	-1.25797	0	-0.226435	-4.05068	0	15.5234	161.109		-1.22338	-1.06059	-1.18672	-1.18946	-1.29082	-1.59059	-0.00487025	0.162756	2.16098
0.024924	0	0	-1.25797	0	-0.301914	-4.15131	0	15.146	169.927		-1.22338	-1.06059	-1.18784	-1.18946	-1.29109	-1.59428	-0.00487025	0.176236	2.31221
0.025814	0	0	-1.25797	0	-0.389972	-3.95004	0	14.3283	177.072		-1.22338	-1.06059	-1.18896	-1.18946	-1.29143	-1.5978	-0.00487025	0.188988	2.46981
0.026705	0	0	-1.25797	0	-0.427711	-3.38395	0	13.7874	182.104		-1.22338	-1.06059	-1.19008	-1.18946	-1.29181	-1.60081	-0.00487025	0.201259	2.63188
0.027595	0	0	-1.25797	0	-0.440291	-2.56627	0	13.3723	189.25		-1.22338	-1.06059	-1.1912	-1.18946	-1.29221	-1.60309	-0.00487025	0.21316	2.80031
0.028485	0	0	-1.25797	0	-0.364812	-2.16371	0	12.9949	191.766		-1.22338	-1.06059	-1.19231	-1.18946	-1.29253	-1.60502	-0.00487025	0.224725	2.97098
0.029375	0	0	-1.25797	0	-0.251595	-1.67311	0	12.6049	194.546		-1.22338	-1.06059	-1.19343	-1.18946	-1.29275	-1.60651	-0.00487025	0.235944	3.14413
0.030265	0	0	-1.25797	0	-0.125797	-1.14476	0	11.9382	192.118		-1.22338	-1.06059	-1.19455	-1.18946	-1.29287	-1.60753	-0.00487025	0.246569	3.31511
0.031155	0	0	-1.25797	0	-0.050319	-0.792524	0	10.7808	183.803		-1.22338	-1.06059	-1.19567	-1.18946	-1.29291	-1.60823	-0.00487025	0.256164	3.4787
0.032046	0	0	-1.25797	0	0	-1.01896	0	8.95678	166.229		-1.22338	-1.06059	-1.19679	-1.18946	-1.29291	-1.60914	-0.00487025	0.264135	3.62664
0.032936	0	0	-1.25797	0	0	-1.28313	0	6.54146	148.516		-1.22338	-1.06059	-1.19791	-1.18946	-1.29291	-1.61028	-0.00487025	0.269957	3.75882
0.033826	0	0	-1.25797	0	0	-1.736	0	4.12615	129.886		-1.22338	-1.06059	-1.19903	-1.18946	-1.29291	-1.61183	-0.00487025	0.273629	3.87442
0.034716	0	0	-1.25797	0	0	-2.02534	0	2.13856	112.538		-1.22338	-1.06059	-1.20015	-1.18946	-1.29291	-1.61363	-0.00487025	0.275533	3.97458
0.035606	0	0	-1.25797	0	0	-2.41531	0	0.717045	97.0653		-1.22338	-1.06059	-1.20127	-1.18946	-1.29291	-1.61578	-0.00487025	0.276171	4.06097
0.036496	0	0	-1.25797	0	0	-2.55369	0	0.037739	84.9007		-1.22338	-1.06059	-1.20239	-1.18946	-1.29291	-1.61805	-0.00487025	0.276205	4.13653
0.037387	0	0	-1.25797	0	0	-2.88076	0	0	72.9122		-1.22338	-1.06059	-1.20351	-1.18946	-1.29291	-1.62062	-0.00487025	0.276205	4.20142
0.038277	0	0	-1.25797	0	0	-3.13236	0	0	59.7286		-1.22338	-1.06059	-1.20463	-1.18946	-1.29291	-1.6234	-0.00487025	0.276205	4.25458
0.039167	0	0	-1.25797	0	0	-3.34621	0	-0.037739	48.2181		-1.22338	-1.06059	-1.20575	-1.18946	-1.29291	-1.62638	-0.00487025	0.276171	4.29749
0.040057	0	0	-1.25797	0	-0.025159	-3.35879	0	-2.39015	39.7897		-1.22338	-1.06059	-1.20687	-1.18946	-1.29293	-1.62937	-0.00487025	0.274044	4.33291
0.040947	-0.025159	0	-1.25797	0	-0.062899	-3.27073	0	-6.18923	33.1099		-1.22341	-1.06059	-1.20799	-1.18946	-1.29299	-1.63228	-0.00487025	0.268535	4.36237
0.041837	-0.037739	0	-1.25797	0	-0.113218	-3.03172	0	-11.3595	27.5245		-1.22344	-1.06059	-1.20911	-1.18946	-1.29309	-1.63498	-0.00487025	0.258425	4.38687
0.042727	-0.050319	0	-1.25797	0	-0.176116	-2.1763	0	-18.14	22.8322		-1.22348	-1.06059	-1.21023	-1.18946	-1.29325	-1.63692	-0.00487025	0.242281	4.40719
0.043618	-0.301914	0	-1.25797	0	-0.226435	-1.55989	0	-25.5369	19.5363		-1.22375	-1.06059	-1.21135	-1.18946	-1.29345	-1.63831	-0.00487025	0.219553	4.42458
0.044508	-0.553509	0	-1.25797	0	-0.264175	-1.00638	0	-31.5122	17.2342		-1.22425	-1.06059	-1.21247	-1.18946	-1.29368	-1.6392	-0.00487025	0.191507	4.43992
0.045398	-1.03154	0	-1.25797	0	-0.289334	-0.553509	0	-36.8461	15.6115		-1.22516	-1.06059	-1.21359	-1.18946	-1.29394	-1.63969	-0.00487025	0.158714	4.45381
0.046288	-1.52215	0	-1.25797	0	-0.289334	-0.01258	0	-41.0729	14.8693		-1.22652	-1.06059	-1.21471	-1.18946	-1.2942	-1.63971	-0.00487025	0.122159	4.46705
0.047178	-2.01276	0	-1.25797	0	-0.276754	-0.276754	0	-44.4191	14.8315		-1.22831	-1.06059	-1.21583	-1.18946	-1.29444	-1.63995	-0.00487025	0.0826262	4.48025
0.048068	-2.45305	0	-1.25797	0	-0.264175	-0.528349	0	-46.935	15.2341		-1.23049	-1.06059	-1.21695	-1.18946	-1.29468	-1.64042	-0.00487025	0.0408541	4.4938
0.048959	-2.88076	0	-1.25797	0	-0.201276	-0.528349	0	-47.8533	16.0895		-1.23306	-1.06059	-1.21807	-1.18946	-1.29486	-1.64089	-0.00487025	-0.00173537	4.50812
0.049849	-3.24557	0	-1.25797	0	-0.138377	-0.528349	0	-46.4821	17.1839		-1.23595	-1.06059	-1.21918	-1.18946	-1.29498	-1.64136	-0.00487025	-0.0431045	4.52342
0.050739	-3.61038	0	-1.25797	0	-0.088058	-0.528349	0	-43.5888	18.3161		-1.23916	-1.06059	-1.2203	-1.18946	-1.29506	-1.64183	-0.00487025	-0.0818985	4.53972
0.051629	-4.20163	0	-1.25797	0	-0.037739	-0.251595	0	-39.9029	19.2093		-1.2429	-1.06059	-1.22142	-1.18946	-1.29509	-1.64206	-0.00487025	-0.117412	4.55682
0.052519	-4.61676	0	-1.25797	0	0	-0.037739	0	-37.5757	19.5112		-1.24701	-1.06059	-1.22254	-1.18946	-1.29509	-1.64209	-0.00487025	-0.150854	4.57418
0.053409	-5.08221	0	-1.25797	0	0	-0.088058	0	-37.4121	18.9325		-1.25153	-1.06059	-1.22366	-1.18946	-1.29509	-1.64217	-0.00487025	-0.184151	4.59103
0.054299	-5.37155	0	-1.25797	0	0	-0.150957	0	-40.2426	17.5739		-1.25631	-1.06059	-1.22478	-1.18946	-1.29509	-1.6423	-0.00487025	-0.219967	4.60667
0.05519	-5.66088	0	-1.25797	0	0	-0.402552	0	-44.9222	15.8631		-1.26135	-1.06059	-1.2259	-1.18946	-1.29509	-1.64266	-0.00487025	-0.259948	4.62079
0.05608	-5.76152	0	-1.25797	0	0	-1.15734	0	-50.1554	14.1774		-1.26648	-1.06059	-1.22702	-1.18946	-1.29509	-1.64369	-0.00487025	-0.304586	4.63341
0.05697	-5.84958	0	-1.25797	0	0	-1.67311	0	-54.6967	12.8313		-1.27168	-1.06059	-1.22814	-1.18946	-1.29509	-1.64518	-0.00487025	-0.353266	4.64483
0.05786	-5.67346	0	-1.25797	0	-0.251595	-1.9247	0	-58.6467	12.1394		-1.27673	-1.06059	-1.22926	-1.18946	-1.29532	-1.64689	-0.00487025	-0.405462	4.65563
0.05875	-5.49735	0	-1.00638	0	-0.50319	-2.37757	0	-61.7414	11.7495		-1.28162	-1.06059	-1.23016	-1.18946	-1.29577	-1.64901	-0.00487025	-0.460412	4.66609
0.05964	-5.33381	0	-0.264175	0	-0.754784	-2.89334	0	-64.6347	11.5482		-1.28637	-1.06059	-1.23039	-1.18946	-1.29644	-1.65158	-0.00487025	-0.517937	4.67637
0.060531	-4.6545	0	0.96864	0	-1.00638	-2.94366	0	-67.7671	10.8815		-1.29051	-1.06059	-1.22953	-1.18946	-1.29733	-1.6542	-0.00487025	-0.578249	4.68605
0.061421	-3.74876	0	2.50337	0	-1.25797	-3.17009	0	-70.6981	9.22095		-1.29385	-1.06059	-1.2273	-1.18946	-1.29845	-1.65703	-0.00487025	-0.641171	4.69426
0.062311	-3.03172	0	4.55387	0	-1.00638	-3.62297	0	-73.3525	7.04465		-1.29655	-1.06059	-1.22325	-1.18946	-1.29935	-1.66025	-0.00487025	-0.706454	4.70053
0.063201	-2.28951	0	6.11375	0	-0.754784	-3.7236	0	-76.3339	4.93126		-1.29859	-1.06059	-1.21781	-1.18946	-1.30002	-1.66356	-0.00487025	-0.774392	4.70492
0.064091	-1.52215	0	7.32141	0	-0.553509	-3.49717	0	-79.3656	2.80528		-1.29994	-1.06059	-1.21129	-1.18946	-1.30051	-1.66668	-0.00487025	-0.845027	4.70741
0.064981	-1.25797	0	8.17683	0	-0.616407	-2.94366	0	-82.4225	1.10702		-1.30106	-1.06059	-1.20401	-1.18946	-1.30106	-1.6693	-0.00487025	-0.918383	4.7084
0.065871	-1.22023	0	8.47874	0	-0.427711	-2.16371	0	-85.9322	0.377392		-1.30215	-1.06059	-1.19647	-1.18946	-1.30144	-1.67122	-0.00487025	-0.994863	4.70873
0.066762	-1.22023	0	8.27747	0	-0.49061	-1.67311	0	-88.9513	0.239015		-1.30323	-1.06059	-1.1891	-1.18946	-1.30188	-1.67271	-0.00487025	-1.07403	4.70895
0.067652	-1.23281	0	8.32779	0	-1.01896	-1.0567	0	-91.1402	0.138377		-1.30433	-1.06059	-1.18169	-1.18946	-1.30279	-1.67365	-0.00487025	-1.15514	4.70907
0.068542	-1.25797	0	8.16425	0	-1.20765	-0.515769	0	-93.6058	0.062899		-1.30545	-1.06059	-1.17442	-1.18946	-1.30386	-1.67411	-0.00487025	-1.23845	4.70913
0.069432	-1.25797	0	7.77428	0	-1.13218	-0.264175	0	-95.8828	0.062899		-1.30657	-1.06059	-1.1675	-1.18946	-1.30487	-1.67435	-0.00487025	-1.32379	4.70918
0.070322	-1.25797	0	7.34657	0	-1.30829	-0.515769	0	-97.4678	0.062899		-1.30769	-1.06059	-1.16097	-1.18946	-1.30603	-1.6748	-0.00487025	-1.41054	4.70924
0.071212	-1.25797	0	6.705	0	-1.48441	-0.50319	0	-99.3045	0.037739		-1.30881	-1.06059	-1.155	-1.18946	-1.30735	-1.67525	-0.00487025	-1.49892	4.70927
0.072103	-1.25797	0	6.27729	-0.01258	-0.95606	-0.754784	0	-101.217	0.025159		-1.30993	-1.06059	-1.14941	-1.18947	-1.3082	-1.67592	-0.00487025	-1.589	4.70929
0.072993	-1.25797	0	6.00054	-0.050319	-0.717045	-0.754784	0	-102.487	0.075478		-1.31105	-1.06059	-1.14407	-1.18952	-1.30884	-1.6766	-0.00487025	-1.68021	4.70936
0.073883	-1.00638	0	5.67346	-0.075478	-0.47803	-0.754784	0	-103.431	0.188696		-1.31194	-1.06059	-1.13902	-1.18958	-1.30927	-1.67727	-0.00487025	-1.77227	4.70953
0.074773	-0.754784	0	5.56025	-0.100638	-0.239015	-0.50319	0	-103.997	0.402552		-1.31262	-1.06059	-1.13407	-1.18967	-1.30948	-1.67772	-0.00487025	-1.86482	4.70989
0.075663	-0.50319	0	5.57282	-0.100638	0	-0.251595	0	-103.946	2.20145		-1.31306	-1.06059	-1.12911	-1.18976	-1.30948	-1.67794	-0.00487025	-1.95734	4.71185
0.076553	-0.251595	0	4.98158	-0.100638	0	-0.150957	0	-103.494	4.31485		-1.31329	-1.06059	-1.12468	-1.18985	-1.30948	-1.67807	-0.00487025	-2.04944	4.71569
0.077443	0	0	3.96262	-0.100638	0	-0.301914	0.188696	-102.462	6.65468		-1.31329	-1.06059	-1.12115	-1.18994	-1.30948	-1.67834	-0.00470231	-2.14064	4.72161
0.078334	0	0	3.09462	-0.113218	0	-0.301914	2.28951	-100.638	8.9442		-1.31329	-1.06059	-1.1184	-1.19004	-1.30948	-1.67861	-0.00266464	-2.2302	4.72957
0.079224	0	0	2.56627	-0.113218	0	-0.553509	4.50355	-98.8516	11.1331		-1.31329	-1.06059	-1.11611	-1.19014	-1.30948	-1.6791	0.00134352	-2.31818	4.73948
0.080114	0	0	2.07566	-0.113218	-0.251595	-0.805103	6.84338	-97.1785	11.7495		-1.31329	-1.06059	-1.11427	-1.19024	-1.3097	-1.67982	0.00743412	-2.40467	4.74993
0.081004	0	0	2.23919	-0.100638	-1.01896	-1.1825	9.25869	-95.1406	12.0514		-1.31329	-1.06059	-1.11227	-1.19033	-1.31061	-1.68087	0.0156744	-2.48935	4.76066
0.081894	0	0	2.96882	-0.062899	-1.77374	-1.57247	11.4853	-93.8323	12.1017		-1.31329	-1.06059	-1.10963	-1.19039	-1.31219	-1.68227	0.0258963	-2.57286	4.77143
0.082784	0	0	3.62297	-0.025159	-2.54111	-2.32725	11.7998	-92.2347	12.1269		-1.31329	-1.06059	-1.10641	-1.19041	-1.31445	-1.68434	0.0363981	-2.65494	4.78222
0.083675	0	0	3.64812	0	-3.54749	-2.83044	12.0011	-90.6496	12.1394		-1.31329	-1.06059	-1.10316	-1.19041	-1.31761	-1.68686	0.047079	-2.73562	4.79303
0.084565	0	0	3.69844	0	-4.34001	-3.33363	12.1394	-88.9388	12.152		-1.31329	-1.06059	-1.09987	-1.19041	-1.32147	-1.68983	0.0578832	-2.81478	4.80384
0.085455	-0.251595	0	3.45943	0	-4.57902	-3.56007	12.2401	-87.4418	12.1394		-1.31351	-1.06059	-1.09679	-1.19041	-1.32555	-1.693	0.0687768	-2.8926	4.81465
0.086345	-0.50319	0	2.9814	0	-4.85578	-3.7865	12.3659	-85.5296	12.0514		-1.31396	-1.06059	-1.09414	-1.19041	-1.32987	-1.69637	0.0797825	-2.96872	4.82537
0.087235	-0.50319	0	2.23919	0	-5.13253	-3.79908	12.4036	-83.8691	12.0262		-1.31441	-1.06059	-1.09214	-1.19041	-1.33444	-1.69975	0.0908217	-3.04337	4.83608
0.088125	-0.50319	0	1.84922	0	-5.17027	-3.79908	12.4036	-82.0325	12.0262		-1.31485	-1.06059	-1.0905	-1.19041	-1.33904	-1.70313	0.101861	-3.11638	4.84678
0.089015	-0.50319	0	1.44667	0	-5.17027	-3.54749	12.3659	-80.1707	11.9759		-1.3153	-1.06059	-1.08921	-1.19041	-1.34364	-1.70629	0.112867	-3.18773	4.85744
0.089906	-0.251595	0	0.905741	0	-5.19543	-3.29589	12.2904	-78.4473	11.8375		-1.31553	-1.06059	-1.0884	-1.19041	-1.34826	-1.70922	0.123805	-3.25755	4.86797
0.090796	0	0	0.779944	0	-5.17027	-3.03172	12.1646	-76.6232	11.7746		-1.31553	-1.06059	-1.08771	-1.19041	-1.35286	-1.71192	0.134632	-3.32574	4.87845
0.091686	0	0	0.842843	0	-5.13253	-2.76754	12.1269	-75.1388	11.5985		-1.31553	-1.06059	-1.08696	-1.19041	-1.35743	-1.71438	0.145424	-3.39261	4.88878
0.092576	0	0	0.754784	-0.251595	-5.0948	-2.51595	12.152	-73.9563	11.3972		-1.31553	-1.06059	-1.08629	-1.19064	-1.36197	-1.71662	0.15624	-3.45843	4.89892
0.093466	0	0	0.540929	-0.251595	-5.05706	-2.51595	12.1269	-73.1009	11.0828		-1.31553	-1.06059	-1.08581	-1.19086	-1.36647	-1.71886	0.167033	-3.52349	4.90878
0.094356	0	0	0.364812	-0.50319	-5.0319	-2.51595	11.674	-72.0819	10.7179		-1.31553	-1.06059	-1.08548	-1.19131	-1.37095	-1.7211	0.177423	-3.58765	4.91832
0.095247	-0.01258	0	-0.163537	-0.754784	-5.0319	-2.51595	11.674	-71.1007	9.90025		-1.31554	-1.06059	-1.08563	-1.19198	-1.37542	-1.72334	0.187812	-3.65093	4.92713
0.096137	-0.050319	0	-0.805103	-1.00638	-5.0319	-2.51595	11.6237	-70.1069	9.23353		-1.31558	-1.06059	-1.08634	-1.19287	-1.3799	-1.72558	0.198157	-3.71332	4.93535
0.097027	-0.075478	0	-1.37119	-1.00638	-5.0319	-2.60401	11.5356	-70.0314	8.13909		-1.31565	-1.06059	-1.08757	-1.19377	-1.38438	-1.7279	0.208424	-3.77565	4.94259
0.097917	-0.100638	0	-2.03792	-1.25797	-5.0319	-2.70464	11.5105	-69.4276	7.30883		-1.31574	-1.06059	-1.08938	-1.19489	-1.38886	-1.7303	0.218668	-3.83744	4.9491
0.098807	-0.100638	0	-2.59143	-1.00638	-5.0319	-2.50337	11.9004	-68.4338	6.90628		-1.31583	-1.06059	-1.09169	-1.19579	-1.39334	-1.73253	0.22926	-3.89835	4.95525
0.099697	-0.088058	0	-2.93108	-1.00638	-5.0319	-2.25177	11.9004	-67.4274	6.85596		-1.31591	-1.06059	-1.09429	-1.19668	-1.39782	-1.73454	0.239851	-3.95836	4.96135
0.100588	-0.050319	0	-3.29589	-1.00638	-5.0319	-1.74858	11.9508	-66.5217	6.66726		-1.31595	-1.06059	-1.09723	-1.19758	-1.4023	-1.73609	0.250487	-4.01756	4.96728
0.101478	-0.025159	0	-3.59781	-1.00638	-5.0319	-1.15734	12.0137	-64.3705	6.9566		-1.31597	-1.06059	-1.10043	-1.19847	-1.40677	-1.73712	0.26118	-4.07485	4.97347
0.102368	0	0	-4.0381	-1.00638	-5.0319	-0.553509	11.9633	-62.4961	7.04465		-1.31597	-1.06059	-1.10402	-1.19937	-1.41125	-1.73761	0.271827	-4.13047	4.97974
0.103258	0	0	-4.969	-1.27055	-5.0319	-0.251595	11.9382	-61.4269	6.74274		-1.31597	-1.06059	-1.10845	-1.2005	-1.41573	-1.73784	0.282452	-4.18514	4.98574
0.104148	0	0	-6.80564	-1.28313	-5.0319	0	11.913	-60.4456	6.44083		-1.31597	-1.06059	-1.1145	-1.20164	-1.42021	-1.73784	0.293054	-4.23894	4.99148
0.105038	0	0	-9.04483	-1.03154	-5.0319	0	11.8375	-59.3135	6.07601		-1.31597	-1.06059	-1.12255	-1.20256	-1.42469	-1.73784	0.30359	-4.29173	4.99688
0.105928	0	0	-12.6678	-0.779944	-5.0319	0	11.7369	-58.2945	5.56025		-1.31597	-1.06059	-1.13383	-1.20325	-1.42917	-1.73784	0.314036	-4.34361	5.00183
0.106819	0	0	-17.6745	-0.528349	-5.0319	0	11.7117	-57.2252	4.94384		-1.31597	-1.06059	-1.14956	-1.20372	-1.43364	-1.73784	0.324459	-4.39454	5.00623
0.107709	0	0	-23.6751	-0.264175	-5.0319	0	11.7117	-55.8037	4.47839		-1.31597	-1.06059	-1.17063	-1.20396	-1.43812	-1.73784	0.334883	-4.44421	5.01022
0.108599	0	0	-30.1033	0	-5.0319	-0.01258	11.6363	-54.4703	3.87456		-1.31597	-1.06059	-1.19742	-1.20396	-1.4426	-1.73785	0.345239	-4.49268	5.01367
0.109489	0	0	-36.4938	0	-5.0319	-0.050319	11.5356	-53.0739	3.20783		-1.31597	-1.06059	-1.2299	-1.20396	-1.44708	-1.73789	0.355506	-4.53992	5.01652
0.110379	0	0	-41.5509	0	-5.0319	-0.075478	11.5356	-51.665	2.49079		-1.31597	-1.06059	-1.26688	-1.20396	-1.45156	-1.73796	0.365772	-4.5859	5.01874
0.111269	0	0	-46.6331	0	-5.0319	-0.075478	11.3721	-50.6586	1.88696		-1.31597	-1.06059	-1.30838	-1.20396	-1.45604	-1.73803	0.375893	-4.63099	5.02042
0.11216	0	0	-50.9479	0	-5.0319	-0.138377	11.1708	-49.4635	1.27055		-1.31597	-1.06059	-1.35373	-1.20396	-1.46051	-1.73815	0.385835	-4.67501	5.02155
0.11305	0	0	-53.8916	0	-5.0319	-0.201276	11.045	-48.2685	0.817683		-1.31597	-1.06059	-1.40169	-1.20396	-1.46499	-1.73833	0.395666	-4.71797	5.02228
0.11394	0	0	-56.4076	0	-5.0319	-0.213856	11.0199	-47.0985	0.314493		-1.31597	-1.06059	-1.45189	-1.20396	-1.46947	-1.73852	0.405473	-4.75989	5.02256
0.11483	0	0	-62.6723	0	-5.0319	-0.251595	10.8563	-46.0544	-0.075478		-1.31597	-1.06059	-1.50767	-1.20396	-1.47395	-1.73875	0.415135	-4.80088	5.02249
0.11572	0	0	-65.2385	0	-5.0319	-0.314493	10.655	-44.6707	-0.628987		-1.31597	-1.06059	-1.56573	-1.20396	-1.47843	-1.73902	0.424618	-4.84063	5.02193
0.11661	0	0	-69.4402	0	-5.0319	-0.289334	10.4789	-43.7523	-1.22023		-1.31597	-1.06059	-1.62754	-1.20396	-1.48291	-1.73928	0.433945	-4.87957	5.02084
0.1175	0	0	-72.6354	0	-5.0319	-0.213856	10.1267	-42.9472	-1.78632		-1.31597	-1.06059	-1.69218	-1.20396	-1.48738	-1.73947	0.442957	-4.9178	5.01925
0.118391	0	0	-78.6611	0	-5.0319	-0.163537	9.72414	-42.2679	-1.63537		-1.31597	-1.06059	-1.76219	-1.20396	-1.49186	-1.73962	0.451612	-4.95541	5.0178
0.119281	0	0	-80.7368	0	-5.0319	-0.100638	9.38449	-41.6893	-1.42151		-1.31597	-1.06059	-1.83405	-1.20396	-1.49634	-1.73971	0.459964	-4.99252	5.01653
0.120171	0	0	-84.4981	0	-5.0319	-0.037739	8.89388	-41.0854	-0.96864		-1.31597	-1.06059	-1.90925	-1.20396	-1.50082	-1.73974	0.46788	-5.02908	5.01567
0.121061	0	0	-86.3348	0	-5.04448	0	8.10135	-40.23	-0.49061		-1.31597	-1.06059	-1.98609	-1.20396	-1.50531	-1.73974	0.47509	-5.06489	5.01523
0.121951	0	0	-85.8945	-0.01258	-5.05706	-0.754784	7.49753	-39.0601	0		-1.31597	-1.06059	-2.06253	-1.20397	-1.50981	-1.74041	0.481763	-5.09965	5.01523
0.122841	-0.01258	0	-79.9946	-0.01258	-5.05706	-1.50957	6.86854	-38.0411	0		-1.31599	-1.06059	-2.13373	-1.20398	-1.51431	-1.74176	0.487876	-5.13351	5.01523
0.123732	-0.050319	0	-73.126	-0.01258	-5.05706	-2.26435	6.18923	-37.0725	0		-1.31603	-1.06059	-2.19881	-1.20399	-1.51881	-1.74377	0.493384	-5.1665	5.01523
0.124622	-0.062899	0	-68.8238	-0.01258	-5.05706	-3.01914	5.98796	-36.129	0		-1.31609	-1.06059	-2.26006	-1.204	-1.52331	-1.74646	0.498713	-5.19866	5.01523
0.125512	-0.100638	0	-65.5656	-0.01258	-5.04448	-3.77392	5.8999	-35.3113	0		-1.31618	-1.06059	-2.31842	-1.20401	-1.5278	-1.74982	0.503964	-5.23008	5.01523
0.126402	-0.138377	0	-65.3392	0	-5.0319	-3.77392	5.72378	-34.6949	0		-1.3163	-1.06059	-2.37657	-1.20401	-1.53228	-1.75318	0.509058	-5.26096	5.01523
0.127292	-0.163537	0.239015	-67.0249	0	-5.04448	-3.52233	5.30865	-34.1414	0		-1.31644	-1.06038	-2.43622	-1.20401	-1.53677	-1.75631	0.513783	-5.29135	5.01523
0.128182	-0.163537	1.13218	-71.2516	0	-5.04448	-3.28331	4.7803	-33.5879	0		-1.31659	-1.05937	-2.49963	-1.20401	-1.54126	-1.75923	0.518037	-5.32124	5.01523
0.129072	-0.188696	2.33983	-73.9437	0	-5.04448	-3.06946	4.07584	-33.0344	0		-1.31676	-1.05729	-2.56544	-1.20401	-1.54575	-1.76197	0.521665	-5.35064	5.01523
0.129963	-0.188696	3.7865	-78.485	0	-5.04448	-2.57885	3.47201	-32.6067	0		-1.31693	-1.05392	-2.6353	-1.20401	-1.55024	-1.76426	0.524755	-5.37966	5.01523
0.130853	-0.176116	5.53508	-79.6046	0	-5.04448	-1.82406	2.94366	-32.1412	0		-1.31708	-1.049	-2.70614	-1.20401	-1.55473	-1.76588	0.527375	-5.40827	5.01523
0.131743	-0.138377	7.20819	-84.0704	0	-4.79288	-1.32087	2.41531	-31.5751	0		-1.31721	-1.04258	-2.78097	-1.20401	-1.55899	-1.76706	0.529525	-5.43637	5.01523
0.132633	-0.100638	8.29005	-84.3975	0	-4.79288	-0.805103	1.8618	-31.0091	0		-1.3173	-1.0352	-2.85608	-1.20401	-1.56326	-1.76778	0.531182	-5.46397	5.01523
0.133523	-0.062899	9.09515	-86.297	0	-4.79288	-0.264175	1.42151	-30.4807	0		-1.31735	-1.02711	-2.93288	-1.20401	-1.56753	-1.76801	0.532447	-5.4911	5.01523
0.134413	-0.025159	9.4977	-83.6804	0	-4.79288	0	1.00638	-29.9146	0		-1.31737	-1.01865	-3.00736	-1.20401	-1.57179	-1.76801	0.533342	-5.51772	5.01523
0.135304	0	9.53544	-86.9512	0	-4.79288	0	0.47803	-29.2227	0		-1.31737	-1.01017	-3.08475	-1.20401	-1.57606	-1.76801	0.533768	-5.54373	5.01523
0.136194	0	9.54802	-83.4792	0	-5.0319	0	0.239015	-28.5686	0		-1.31737	-1.00167	-3.15904	-1.20401	-1.58053	-1.76801	0.533981	-5.56915	5.01523
0.137084	0	9.4977	-82.0199	0	-5.0319	0	0.188696	-27.927	0		-1.31737	-0.993217	-3.23204	-1.20401	-1.58501	-1.76801	0.534148	-5.59401	5.01523
0.137974	0	9.37191	-77.8686	0	-5.0319	0	0.138377	-27.3735	0		-1.31737	-0.984876	-3.30134	-1.20401	-1.58949	-1.76801	0.534272	-5.61837	5.01523
0.138864	0	9.40964	-75.8181	0	-5.0319	0	0.113218	-26.5936	0		-1.31737	-0.976501	-3.36882	-1.20401	-1.59397	-1.76801	0.534372	-5.64204	5.01523
0.139754	0	9.34675	-75.2897	0	-5.0319	0	0.150957	-26.1281	0		-1.31737	-0.968183	-3.43583	-1.20401	-1.59845	-1.76801	0.534507	-5.66529	5.01523
0.140644	0	9.14547	-76.7993	0	-5.0319	0	0.176116	-25.4866	0		-1.31737	-0.960043	-3.50418	-1.20401	-1.60293	-1.76801	0.534663	-5.68798	5.01523
0.141535	0	9.05741	-77.0006	0	-5.0319	0	0.176116	-24.845	0		-1.31737	-0.951982	-3.57271	-1.20401	-1.60741	-1.76801	0.53482	-5.71009	5.01523
0.142425	0	8.89388	-79.5417	0	-5.0319	0	0.113218	-24.2663	0		-1.31737	-0.944066	-3.6435	-1.20401	-1.61188	-1.76801	0.534921	-5.73169	5.01523
0.143315	0	8.66744	-81.6802	0	-5.0319	0	0.062899	-23.9518	0		-1.31737	-0.936352	-3.7162	-1.20401	-1.61636	-1.76801	0.534977	-5.753	5.01523
0.144205	0	8.5039	-79.202	0	-5.0319	0	0.025159	-23.6499	0		-1.31737	-0.928784	-3.78669	-1.20401	-1.62084	-1.76801	0.534999	-5.77405	5.01523
0.145095	0	8.12651	-79.5669	-0.01258	-5.0319	0	0	-23.5619	0		-1.31737	-0.921551	-3.8575	-1.20403	-1.62532	-1.76801	0.534999	-5.79502	5.01523
0.145985	0	7.51011	-81.9822	-0.01258	-5.0319	0	0	-23.5619	0		-1.31737	-0.914867	-3.93047	-1.20404	-1.6298	-1.76801	0.534999	-5.81599	5.01523
0.146876	0	7.28367	-82.0702	-0.01258	-5.0319	0	0	-23.4235	0		-1.31737	-0.908385	-4.00351	-1.20405	-1.63428	-1.76801	0.534999	-5.83684	5.01523
0.147766	0	6.96918	-78.963	-0.01258	-5.0319	0	0	-23.3606	0		-1.31737	-0.902182	-4.07379	-1.20406	-1.63875	-1.76801	0.534999	-5.85763	5.01523
0.148656	0	6.80564	-76.837	-0.037739	-5.0319	0	0	-23.109	0		-1.31737	-0.896125	-4.14217	-1.20409	-1.64323	-1.76801	0.534999	-5.8782	5.01523
0.149546	0	6.7679	-74.2708	-0.025159	-5.0319	0	0	-22.9706	-0.251595		-1.31737	-0.890102	-4.20827	-1.20412	-1.64771	-1.76801	0.534999	-5.89864	5.01501
0.150436	0	6.79306	-70.1949	-0.025159	-5.0319	0	0	-22.7442	-0.251595		-1.31737	-0.884056	-4.27075	-1.20414	-1.65219	-1.76801	0.534999	-5.91888	5.01479
0.151326	0	6.47857	-66.9494	-0.025159	-5.0319	0	0	-23.2725	-0.540929		-1.31737	-0.87829	-4.33033	-1.20416	-1.65667	-1.76801	0.534999	-5.9396	5.0143
0.152216	0	6.46599	-65.8675	-0.025159	-5.0319	0	0	-22.7819	-0.578668		-1.31737	-0.872535	-4.38895	-1.20418	-1.66115	-1.76801	0.534999	-5.95987	5.01379
0.153107	-0.025159	6.27729	-65.0498	0	-4.7803	0	0	-22.5932	-0.616407		-1.3174	-0.866949	-4.44685	-1.20418	-1.6654	-1.76801	0.534999	-5.97998	5.01324
0.153997	-0.050319	6.02569	-65.0373	-0.01258	-4.7803	0	0	-22.2913	-0.616407		-1.31744	-0.861586	-4.50473	-1.20419	-1.66965	-1.76801	0.534999	-5.99982	5.01269
0.154887	-0.088058	5.38413	-64.1441	-0.037739	-4.7803	0	0	-21.8258	-1.13218		-1.31752	-0.856794	-4.56182	-1.20423	-1.67391	-1.76801	0.534999	-6.01924	5.01168
0.155777	-0.113218	4.969	-64.5592	-0.037739	-4.7803	0	0	-20.6434	-1.35861		-1.31762	-0.852371	-4.61928	-1.20426	-1.67816	-1.76801	0.534999	-6.03762	5.01048
0.156667	-0.113218	4.40291	-62.5465	-0.037739	-4.52871	0	0	-20.2785	-1.83664		-1.31772	-0.848453	-4.67494	-1.20429	-1.68219	-1.76801	0.534999	-6.05566	5.00884
0.157557	-0.088058	3.95004	-62.559	-0.037739	-4.52871	0	0	-19.637	-2.30209		-1.3178	-0.844937	-4.73062	-1.20433	-1.68622	-1.76801	0.534999	-6.07314	5.00679
0.158448	-0.062899	3.71102	-58.8229	-0.025159	-4.27711	0	0	-18.6683	-2.52853		-1.31786	-0.841635	-4.78297	-1.20435	-1.69003	-1.76801	0.534999	-6.08976	5.00454
0.159338	-0.050319	3.76134	-56.3824	0	-4.02552	0	0	-18.0897	-2.49079		-1.3179	-0.838287	-4.83315	-1.20435	-1.69361	-1.76801	0.534999	-6.10586	5.00233
0.160228	-0.037739	3.58523	-51.3882	0	-3.77392	0	0	-17.4733	-2.6669		-1.31793	-0.835096	-4.87889	-1.20435	-1.69697	-1.76801	0.534999	-6.12141	4.99995
0.161118	-0.037739	3.29589	-50.9731	0	-3.77392	0	0	-16.6682	-2.40273		-1.31797	-0.832163	-4.92426	-1.20435	-1.70033	-1.76801	0.534999	-6.13624	4.99781
0.162008	-0.037739	2.81786	-48.7088	0	-3.77392	0	0	-15.9008	-2.1134		-1.318	-0.829655	-4.96761	-1.20435	-1.70369	-1.76801	0.534999	-6.15039	4.99593
0.162898	-0.037739	2.22661	-46.9602	0	-3.77392	0	0	-15.5108	-1.63537		-1.31803	-0.827673	-5.0094	-1.20435	-1.70705	-1.76801	0.534999	-6.1642	4.99448
0.163788	-0.01258	1.50957	-46.1676	0	-3.52233	0	0	-14.7686	-1.15734		-1.31805	-0.82633	-5.05049	-1.20435	-1.71018	-1.76801	0.534999	-6.17734	4.99345
0.164679	0	0.868002	-46.2054	-0.062899	-3.27073	0	0	-14.1899	-0.46545		-1.31805	-0.825557	-5.09161	-1.20441	-1.7131	-1.76801	0.534999	-6.18997	4.99303
0.165569	0	0.264175	-44.092	-0.113218	-3.01914	0	0	-13.8251	-0.213856		-1.31805	-0.825322	-5.13085	-1.20451	-1.71578	-1.76801	0.534999	-6.20228	4.99284
0.166459	0	-0.01258	-41.2741	-0.125797	-2.76754	-0.01258	0	-13.3597	0		-1.31805	-0.825333	-5.16759	-1.20462	-1.71825	-1.76802	0.534999	-6.21417	4.99284
0.167349	0	-0.239015	-41.3496	-0.125797	-2.51595	-0.037739	0	-12.9446	0		-1.31805	-0.825546	-5.20439	-1.20473	-1.72048	-1.76806	0.534999	-6.22569	4.99284
0.168239	0	-0.176116	-41.4251	-0.125797	-2.26435	-0.037739	0	-12.7055	0		-1.31805	-0.825703	-5.24126	-1.20484	-1.7225	-1.76809	0.534999	-6.23699	4.99284
0.169129	0	-0.377392	-41.966	-0.062899	-2.01276	-0.037739	0	-12.5546	0		-1.31805	-0.826039	-5.27861	-1.2049	-1.72429	-1.76812	0.534999	-6.24817	4.99284
0.17002	0	-0.528349	-42.5195	-0.01258	-1.76116	-0.037739	0	-12.391	0		-1.31805	-0.826509	-5.31645	-1.20491	-1.72586	-1.76816	0.534999	-6.2592	4.99284
0.17091	0	-1.09444	-42.2176	0	-1.50957	-0.025159	0	-12.4414	0		-1.31805	-0.827483	-5.35402	-1.20491	-1.7272	-1.76818	0.534999	-6.27027	4.99284
0.1718	-0.025159	-2.59143	-42.3308	0	-1.25797	0	0	-12.3659	-0.01258		-1.31807	-0.829789	-5.3917	-1.20491	-1.72832	-1.76818	0.534999	-6.28127	4.99283
0.17269	-0.025159	-4.70482	-41.6767	0	-1.25797	0	0	-12.9194	-0.025159		-1.31809	-0.833976	-5.42879	-1.20491	-1.72944	-1.76818	0.534999	-6.29277	4.99281
0.17358	-0.025159	-7.05723	-40.1168	0	-1.25797	0	0	-12.781	-0.075478		-1.31811	-0.840257	-5.46449	-1.20491	-1.73056	-1.76818	0.534999	-6.30415	4.99274
0.17447	-0.025159	-10.7305	-38.8588	0	-1.25797	0	0	-12.781	-0.088058		-1.31813	-0.849808	-5.49908	-1.20491	-1.73168	-1.76818	0.534999	-6.31552	4.99266
0.175361	-0.025159	-15.9763	-39.0475	0	-1.25797	0	0	-12.7181	-0.113218		-1.31816	-0.864026	-5.53383	-1.20491	-1.7328	-1.76818	0.534999	-6.32684	4.99256
0.176251	0	-22.0523	-38.5192	0	-1.25797	0	0	-12.7055	-0.163537		-1.31816	-0.883653	-5.56811	-1.20491	-1.73392	-1.76818	0.534999	-6.33815	4.99242
0.177141	0	-28.8705	-38.2298	0	-1.25797	0	0	-12.1017	-0.226435		-1.31816	-0.909348	-5.60214	-1.20491	-1.73504	-1.76818	0.534999	-6.34892	4.99222
0.178031	-0.025159	-37.3115	-37.9028	-0.239015	-1.25797	-0.01258	0	-12.1017	-0.239015		-1.31818	-0.942555	-5.63587	-1.20512	-1.73616	-1.76819	0.534999	-6.35969	4.992
0.178921	-0.062899	-45.3248	-37.3115	-0.47803	-1.25797	-0.025159	0	-12.0891	-0.352233		-1.31824	-0.982894	-5.66908	-1.20555	-1.73728	-1.76821	0.534999	-6.37045	4.99169
0.179811	-0.088058	-50.8096	-36.4435	-0.95606	-1.25797	-0.037739	0	-12.0765	-0.427711		-1.31831	-1.02811	-5.70151	-1.2064	-1.7384	-1.76825	0.534999	-6.3812	4.99131
0.180701	-0.088058	-57.2127	-34.9465	-1.43409	-1.25797	-0.050319	0	-12.0765	-0.47803		-1.31839	-1.07903	-5.73262	-1.20768	-1.73952	-1.76829	0.534999	-6.39195	4.99088
0.181592	-0.088058	-60.9488	-33.4747	-2.15114	-1.25797	-0.050319	0	-12.0765	-0.603827		-1.31847	-1.13328	-5.76241	-1.20959	-1.74064	-1.76834	0.534999	-6.40269	4.99035
0.182482	-0.062899	-62.1062	-32.4557	-2.62917	-1.25797	-0.037739	0	-12.0765	-0.717045		-1.31853	-1.18855	-5.79129	-1.21193	-1.74176	-1.76837	0.534999	-6.41344	4.98971
0.183372	-0.025159	-63.1251	-32.0406	-3.1072	-1.25797	-0.025159	0	-12.0765	-0.742205		-1.31855	-1.24473	-5.81981	-1.2147	-1.74288	-1.76839	0.534999	-6.42419	4.98905
0.184262	0	-64.5592	-31.3487	-3.33363	-1.25797	-0.01258	0	-12.0765	-0.779944		-1.31855	-1.30219	-5.84771	-1.21766	-1.744	-1.7684	0.534999	-6.43494	4.98835
0.185152	0	-62.4207	-30.4555	-3.54749	-1.25797	0	0	-12.0765	-0.767364		-1.31855	-1.35775	-5.87482	-1.22082	-1.74512	-1.7684	0.534999	-6.44569	4.98767
0.186042	0	-62.9616	-29.9272	-3.53491	-1.25797	0	0	-12.0765	-0.666726		-1.31855	-1.41378	-5.90145	-1.22397	-1.74624	-1.7684	0.534999	-6.45643	4.98708
0.186933	0	-65.8046	-29.2479	-3.53491	-1.25797	0	0	-12.0765	-0.603827		-1.31855	-1.47235	-5.92748	-1.22711	-1.74735	-1.7684	0.534999	-6.46718	4.98654
0.187823	-0.201276	-67.3268	-27.7509	-3.74876	-1.25797	0	0	-12.0514	-0.566088		-1.31873	-1.53227	-5.95218	-1.23045	-1.74847	-1.7684	0.534999	-6.47791	4.98603
0.188713	-0.641567	-71.2768	-26.7194	-3.98778	-1.25797	0	0	-12.0514	-0.553509		-1.3193	-1.59571	-5.97596	-1.234	-1.74959	-1.7684	0.534999	-6.48863	4.98554
0.189603	-1.1196	-75.9816	-25.8765	-4.25195	-1.25797	-0.01258	0	-12.0514	-0.578668		-1.3203	-1.66333	-5.99899	-1.23778	-1.75071	-1.76841	0.534999	-6.49936	4.98503
0.190493	-1.59763	-80.4097	-25.323	-4.52871	-1.25797	-0.037739	0	-12.0514	-0.591248		-1.32172	-1.73489	-6.02153	-1.24181	-1.75183	-1.76845	0.534999	-6.51009	4.9845
0.191383	-2.1134	-79.743	-24.4676	-4.56644	-1.25797	-0.062899	0	-12.0514	-0.49061		-1.3236	-1.80586	-6.0433	-1.24588	-1.75295	-1.7685	0.534999	-6.52081	4.98406
0.192273	-2.41531	-83.3408	-24.1028	-4.39033	-1.25797	-0.075478	0	-12.0514	-0.415131		-1.32575	-1.88004	-6.06476	-1.24978	-1.75407	-1.76857	0.534999	-6.53154	4.98369
0.193164	-2.22661	-85.2529	-23.5493	-4.20163	-1.25797	-0.088058	0	-12.0514	-0.339653		-1.32773	-1.95591	-6.08571	-1.25352	-1.75519	-1.76865	0.534999	-6.54226	4.98339
0.194054	-2.00018	-85.7435	-22.7442	-4.00036	-1.25797	-0.113218	0	-12.0011	-0.276754		-1.32951	-2.03222	-6.10596	-1.25708	-1.75631	-1.76875	0.534999	-6.55294	4.98315
0.194944	-1.52215	-84.5358	-21.9265	-3.77392	-1.25797	-0.088058	0	-11.9382	-0.251595		-1.33086	-2.10746	-6.12547	-1.26044	-1.75743	-1.76883	0.534999	-6.56357	4.98292
0.195834	-1.00638	-86.3851	-21.4107	-3.77392	-1.25797	-0.088058	0	-11.9256	-1.28313		-1.33176	-2.18434	-6.14453	-1.2638	-1.75855	-1.76891	0.534999	-6.57418	4.98178
0.196724	-0.50319	-82.6866	-21.1088	-3.77392	-1.25797	-0.075478	0	-11.913	-2.57885		-1.33221	-2.25794	-6.16331	-1.26716	-1.75967	-1.76897	0.534999	-6.58479	4.97949
0.197614	-0.251595	-77.5541	-20.9956	-3.77392	-1.25797	-0.062899	0	-11.8753	-3.63555		-1.33243	-2.32696	-6.182	-1.27052	-1.76079	-1.76903	0.534999	-6.59535	4.97625
0.198505	0	-76.2458	-21.0207	-3.77392	-1.25797	-0.037739	0	-11.8124	-4.13873		-1.33243	-2.39482	-6.20071	-1.27388	-1.76191	-1.76906	0.534999	-6.60587	4.97257
0.199395	0	-74.2582	-20.5553	-3.77392	-1.25797	-0.037739	0	-11.8753	-4.37775		-1.33243	-2.46091	-6.219	-1.27724	-1.76303	-1.7691	0.534999	-6.61644	4.96867
0.200285	0	-74.2834	-20.0269	-3.52233	-1.25797	-0.01258	0	-11.8627	-3.67328		-1.33243	-2.52702	-6.23683	-1.28037	-1.76415	-1.76911	0.534999	-6.62699	4.9654
0.201175	0	-78.5353	-19.4483	-3.45943	-1.25797	-0.01258	0	-11.9004	-2.7298		-1.33243	-2.59692	-6.25414	-1.28345	-1.76527	-1.76912	0.534999	-6.63759	4.96297
0.202065	0	-79.4536	-19.9389	-3.39653	-1.25797	-0.01258	0	-11.9382	-2.01276		-1.33243	-2.66763	-6.27188	-1.28647	-1.76639	-1.76913	0.534999	-6.64821	4.96118
0.202955	0	-80.3216	-20.1527	-3.35879	-1.25797	0	0	-11.8753	-1.78632		-1.33243	-2.73912	-6.28982	-1.28946	-1.76751	-1.76913	0.534999	-6.65878	4.95959
0.203845	-0.01258	-73.365	-19.9389	-3.32105	-1.25797	0	0	-11.674	-1.50957		-1.33244	-2.80441	-6.30756	-1.29242	-1.76863	-1.76913	0.534999	-6.66917	4.95825
0.204736	-0.025159	-64.4837	-19.4231	-3.54749	-1.25797	0	0	-11.5985	-1.16992		-1.33247	-2.8618	-6.32485	-1.29558	-1.76975	-1.76913	0.534999	-6.67949	4.95721
0.205626	-0.050319	-54.6841	-19.2722	-3.59781	-1.25797	0	0	-11.4979	-0.779944		-1.33251	-2.91047	-6.342	-1.29878	-1.77087	-1.76913	0.534999	-6.68973	4.95651
0.206516	-0.075478	-51.2624	-18.0645	-3.6607	-1.25797	0	0	-11.3469	-0.389972		-1.33258	-2.95609	-6.35808	-1.30204	-1.77199	-1.76913	0.534999	-6.69982	4.95616
0.207406	-0.075478	-45.4506	-16.794	-3.69844	-1.25797	0	0	-11.2589	0		-1.33264	-2.99654	-6.37303	-1.30533	-1.77311	-1.76913	0.534999	-6.70984	4.95616
0.208296	-0.062899	-48.281	-16.2404	-3.73618	-1.25797	0.641567	0	-11.1582	1.15734		-1.3327	-3.03952	-6.38748	-1.30865	-1.77423	-1.76856	0.534999	-6.71978	4.95719
0.209186	-0.050319	-53.6023	-16.0769	-3.76134	-1.25797	2.08824	0	-11.0199	3.13236		-1.33275	-3.08722	-6.40179	-1.312	-1.77534	-1.7667	0.534999	-6.72958	4.95998
0.210077	-0.037739	-58.1939	-15.2215	-3.77392	-1.25797	3.98778	0	-10.9192	4.69224		-1.33278	-3.13901	-6.41533	-1.31536	-1.77646	-1.76315	0.534999	-6.7393	4.96416
0.210967	-0.01258	-62.4584	-14.2403	-3.77392	-1.25797	6.59178	0	-10.8563	7.08239		-1.33279	-3.1946	-6.42801	-1.31872	-1.77758	-1.75729	0.534999	-6.74896	4.97046
0.211857	-0.025159	-63.3516	-13.6364	-3.52233	-1.25797	9.76188	0	-10.8437	9.15805		-1.33281	-3.25098	-6.44014	-1.32185	-1.7787	-1.7486	0.534999	-6.75861	4.97861
0.212747	-0.037739	-67.0374	-13.3345	-3.01914	-1.25797	12.693	0	-10.7054	10.4789		-1.33285	-3.31065	-6.45201	-1.32454	-1.77982	-1.7373	0.534999	-6.76814	4.98794
0.213637	-0.075478	-69.893	-12.932	-2.51595	-1.25797	15.3724	0	-10.4538	10.9192		-1.33291	-3.37285	-6.46352	-1.32678	-1.78094	-1.72362	0.534999	-6.77745	4.99766
0.214527	-0.062899	-73.4531	-12.6049	-2.01276	-1.25797	17.9513	0	-10.2525	11.7746		-1.33297	-3.43823	-6.47474	-1.32857	-1.78206	-1.70764	0.534999	-6.78657	5.00814
0.215417	-0.062899	-74.6104	-12.2652	-1.50957	-1.25797	20.1527	0	-10.1267	11.7998		-1.33303	-3.50463	-6.48566	-1.32991	-1.78318	-1.68971	0.534999	-6.79558	5.01864
0.216308	-0.050319	-75.7678	-11.9508	-1.00638	-1.25797	21.612	0	-10.0386	12.0891		-1.33307	-3.57206	-6.49629	-1.33081	-1.7843	-1.67047	0.534999	-6.80452	5.0294
0.217198	-0.037739	-74.233	-11.435	-0.754784	-1.25797	23.7128	0	-9.98831	12.0765		-1.3331	-3.63813	-6.50647	-1.33148	-1.78542	-1.64937	0.534999	-6.81341	5.04014
0.218088	0	-71.8052	-11.1205	-0.50319	-1.25797	25.4614	0	-9.93799	12.0765		-1.3331	-3.70204	-6.51637	-1.33193	-1.78654	-1.62671	0.534999	-6.82225	5.05089
0.218978	0	-67.5658	-11.0576	-0.251595	-1.25797	26.342	0	-9.77446	12.064		-1.3331	-3.76217	-6.52621	-1.33215	-1.78766	-1.60326	0.534999	-6.83095	5.06163
0.219868	0	-62.1188	-10.9821	0	-1.25797	27.688	0	-9.67382	12.0262		-1.3331	-3.81746	-6.53598	-1.33215	-1.78878	-1.57862	0.534999	-6.83956	5.07233
0.220758	0	-61.125	-10.9695	0	-1.25797	28.9963	0	-9.64866	12.0137		-1.3331	-3.87186	-6.54575	-1.33215	-1.7899	-1.55281	0.534999	-6.84815	5.08303
0.221649	0	-59.8796	-11.0199	0	-1.25797	28.795	0	-9.76188	12.0891		-1.3331	-3.92515	-6.55555	-1.33215	-1.79102	-1.52719	0.534999	-6.85684	5.09378
0.222539	0	-56.8856	-10.9695	0	-1.25797	29.6756	0	-9.67382	12.1898		-1.3331	-3.97578	-6.56532	-1.33215	-1.79214	-1.50077	0.534999	-6.86545	5.10463
0.223429	0	-54.8099	-10.957	0	-1.25797	31.6884	0	-9.67382	12.3533		-1.3331	-4.02456	-6.57507	-1.33215	-1.79326	-1.47257	0.534999	-6.87406	5.11563
0.224319	0	-55.766	-10.9947	0	-1.25797	31.311	0	-9.20837	12.4414		-1.3331	-4.07419	-6.58485	-1.33215	-1.79438	-1.44471	0.534999	-6.88225	5.1267
0.225209	0	-57.1875	-10.9444	0	-1.25797	31.9525	0	-8.61712	12.4539		-1.3331	-4.12509	-6.59459	-1.33215	-1.7955	-1.41627	0.534999	-6.88992	5.13779
0.226099	0	-58.1687	-10.8689	0	-1.25797	34.1792	0	-8.30263	12.4288		-1.3331	-4.17686	-6.60427	-1.33215	-1.79662	-1.38585	0.534999	-6.89731	5.14885
0.226989	0	-57.7787	-10.7305	0	-1.25797	35.2233	0	-8.23973	12.4665		-1.3331	-4.22828	-6.61382	-1.33215	-1.79774	-1.3545	0.534999	-6.90464	5.15994
0.22788	0	-57.1749	-10.4663	0	-1.25797	33.9653	0	-8.00071	12.3785		-1.3331	-4.27917	-6.62313	-1.33215	-1.79886	-1.32427	0.534999	-6.91176	5.17096
0.22877	0	-56.1308	-10.1267	0	-1.25797	33.6634	0	-8.02587	12.3281		-1.3331	-4.32912	-6.63214	-1.33215	-1.79998	-1.29431	0.534999	-6.91891	5.18193
0.22966	0	-53.4387	-9.7493	0	-1.25797	34.4056	-0.01258	-7.7617	12.3281		-1.3331	-4.37668	-6.64082	-1.33215	-1.8011	-1.26369	0.534988	-6.92581	5.1929
0.23055	0	-49.1616	-9.5606	0	-1.25797	35.3994	-0.025159	-6.51631	12.2778		-1.3331	-4.42044	-6.64933	-1.33215	-1.80222	-1.23218	0.534966	-6.93161	5.20383
0.23144	0	-49.3503	-9.38449	0	-1.00638	37.0222	-0.025159	-4.79288	12.0262		-1.3331	-4.46436	-6.65768	-1.33215	-1.80311	-1.19923	0.534943	-6.93588	5.21453
0.23233	0	-49.6648	-9.20837	0	-1.00638	38.6827	-0.025159	-3.18267	11.9256		-1.3331	-4.50856	-6.66588	-1.33215	-1.80401	-1.16481	0.534921	-6.93871	5.22515
0.233221	0	-49.3755	-9.05741	0	-1.00638	42.5573	-0.025159	-0.993799	11.9256		-1.3331	-4.5525	-6.67394	-1.33215	-1.8049	-1.12693	0.534899	-6.9396	5.23576
0.234111	0	-49.0736	-8.84356	0	-0.754784	46.2683	-0.01258	2.52853	11.9256		-1.3331	-4.59618	-6.68181	-1.33215	-1.80557	-1.08575	0.534887	-6.93735	5.24637
0.235001	0	-50.4825	-8.51648	0	-0.754784	48.1175	0	5.47219	11.5482		-1.3331	-4.64111	-6.68939	-1.33215	-1.80625	-1.04293	0.534887	-6.93248	5.25665
0.235891	0	-49.5768	-8.27747	0	-1.00638	46.1425	0	9.82478	9.79962		-1.3331	-4.68523	-6.69676	-1.33215	-1.80714	-1.00186	0.534887	-6.92373	5.26537
0.236781	0	-47.9665	-8.12651	0	-1.00638	50.1303	0	14.6051	7.47236		-1.3331	-4.72792	-6.70399	-1.33215	-1.80804	-0.957244	0.534887	-6.91073	5.27202
0.237671	0	-45.2996	-7.90008	0	-1.00638	51.6021	0	19.2093	5.05706		-1.3331	-4.76824	-6.71102	-1.33215	-1.80893	-0.911318	0.534887	-6.89364	5.27653
0.238562	0	-42.7963	-7.73654	0	-1.00638	49.8787	0	23.4361	2.64174		-1.3331	-4.80633	-6.71791	-1.33215	-1.80983	-0.866926	0.534887	-6.87278	5.27888
0.239452	0	-40.6829	-7.42205	0	-1.00638	51.275	0	28.1283	-0.113218		-1.3331	-4.84254	-6.72451	-1.33215	-1.81072	-0.821291	0.534887	-6.84775	5.27878
0.240342	0	-38.494	-6.96918	0	-1.00638	56.8478	0	32.3425	-3.08204		-1.3331	-4.8768	-6.73071	-1.33215	-1.81162	-0.770697	0.534887	-6.81896	5.27603
0.241232	0	-36.4812	-6.41567	0	-1.00638	59.7789	0	37.0977	-6.91886		-1.3331	-4.90926	-6.73642	-1.33215	-1.81252	-0.717494	0.534887	-6.78594	5.26988
0.242122	0	-35.8648	-6.13891	0	-1.00638	59.1248	0	42.6831	-11.7243		-1.3331	-4.94118	-6.74189	-1.33215	-1.81341	-0.664873	0.534887	-6.74796	5.25944
0.243012	-0.01258	-34.632	-5.82442	0	-1.25797	57.8039	0	47.9414	-18.1651		-1.33312	-4.97201	-6.74707	-1.33215	-1.81453	-0.613427	0.534887	-6.70529	5.24327
0.243902	-0.01258	-33.6885	-5.66088	0	-1.25797	52.3443	0	54.2313	-24.8576		-1.33313	-5.00199	-6.75211	-1.33215	-1.81565	-0.566841	0.534887	-6.65702	5.22115
0.244793	-0.01258	-34.8585	-5.33381	0	-1.25797	48.2685	0	60.0431	-30.7826		-1.33314	-5.03301	-6.75686	-1.33215	-1.81677	-0.523882	0.534887	-6.60358	5.19375
0.245683	-0.01258	-35.4497	-5.05706	0	-1.00638	36.6196	0	66.2449	-36.0787		-1.33315	-5.06456	-6.76136	-1.33215	-1.81767	-0.49129	0.534887	-6.54463	5.16164
0.246573	-0.01258	-35.0597	-4.60419	0	-1.00638	29.6379	0	72.0567	-41.2615		-1.33316	-5.09577	-6.76545	-1.33215	-1.81856	-0.464913	0.534887	-6.4805	5.12492
0.247463	0	-35.1478	-4.22679	0	-1.00638	24.8072	0	77.8937	-45.6141		-1.33316	-5.12705	-6.76922	-1.33215	-1.81946	-0.442834	0.534887	-6.41117	5.08432
0.248353	0	-34.6194	-3.89972	0	-1.00638	20.3289	0	83.0263	-48.9855		-1.33316	-5.15786	-6.77269	-1.33215	-1.82035	-0.424741	0.534887	-6.33728	5.04073
0.249243	0	-32.2167	-3.76134	0	-1.00638	11.9256	0	88.5362	-50.4699		-1.33316	-5.18653	-6.77604	-1.33215	-1.82125	-0.414128	0.534887	-6.25848	4.99581
0.250134	0	-30.3046	-3.62297	0	-1.25797	10.9192	0	91.7818	-50.0799		-1.33316	-5.2135	-6.77926	-1.33215	-1.82237	-0.40441	0.534887	-6.17679	4.95124
0.251024	0	-29.0844	-3.47201	0	-1.00638	8.13909	0	95.9583	-48.5075		-1.33316	-5.23939	-6.78235	-1.33215	-1.82326	-0.397166	0.534887	-6.09139	4.90807
0.251914	0	-27.9144	-3.32105	0	-1.00638	4.47839	0	102.047	-46.935		-1.33316	-5.26423	-6.78531	-1.33215	-1.82416	-0.39318	0.534887	-6.00057	4.86629
0.252804	0	-27.4742	-2.95624	0	-1.00638	1.63537	0	107.871	-47.086		-1.33316	-5.28868	-6.78794	-1.33215	-1.82505	-0.391725	0.534887	-5.90456	4.82439
0.253694	0	-26.9206	-2.6669	0	-0.754784	2.25177	0	113.608	-49.8409		-1.33316	-5.31264	-6.79031	-1.33215	-1.82573	-0.38972	0.534887	-5.80345	4.78003
0.254584	0	-26.7194	-2.36499	0	-0.754784	-0.616407	0	121.558	-54.9609		-1.33316	-5.33642	-6.79241	-1.33215	-1.8264	-0.390269	0.534887	-5.69527	4.73111
0.255474	0	-26.3168	-2.22661	0	-0.754784	-3.79908	0	129.534	-61.213		-1.33316	-5.35985	-6.7944	-1.33215	-1.82707	-0.39365	0.534887	-5.57998	4.67663
0.256365	0	-26.0275	-2.00018	0	-0.754784	-2.88076	0	134.918	-67.2261		-1.33316	-5.38301	-6.79618	-1.33215	-1.82774	-0.396214	0.534887	-5.4599	4.6168
0.257255	0	-25.7256	-1.89954	0	-0.754784	-3.0443	0	140.39	-72.1322		-1.33316	-5.40591	-6.79787	-1.33215	-1.82841	-0.398924	0.534887	-5.33496	4.55261
0.258145	0	-25.1469	-1.81148	0	-1.00638	-5.22059	0	145.61	-75.7678		-1.33316	-5.42829	-6.79948	-1.33215	-1.82931	-0.40357	0.534887	-5.20536	4.48517
0.259035	0	-25.1092	-1.78632	0	-1.00638	-5.15769	0	148.856	-79.1769		-1.33316	-5.45063	-6.80107	-1.33215	-1.8302	-0.40816	0.534887	-5.07288	4.4147
0.259925	0	-24.455	-1.52215	0	-1.25797	-4.39033	0	153.674	-81.9318		-1.33316	-5.4724	-6.80242	-1.33215	-1.83132	-0.412068	0.534887	-4.93611	4.34179
0.260815	0	-23.5115	-1.38377	0	-1.25797	-6.31503	0	159.423	-84.6616		-1.33316	-5.49332	-6.80366	-1.33215	-1.83244	-0.417688	0.534887	-4.79423	4.26644
0.261706	0	-22.6939	-1.23281	0	-1.25797	-6.6421	-0.025159	166.543	-87.1273		-1.33316	-5.51352	-6.80475	-1.33215	-1.83356	-0.423599	0.534865	-4.646	4.18889
0.262596	0	-22.1655	-1.08186	0	-1.25797	-7.17045	-0.025159	172.795	-89.8948		-1.33316	-5.53325	-6.80572	-1.33215	-1.83468	-0.429981	0.534843	-4.49221	4.10889
0.263486	0	-20.7943	-0.918321	0	-1.25797	-7.17045	-0.025159	179.991	-92.3101		-1.33316	-5.55176	-6.80653	-1.33215	-1.8358	-0.436363	0.53482	-4.33202	4.02673
0.264376	0	-19.9892	-0.880582	0	-1.00638	-6.15149	-0.025159	184.985	-95.0903		-1.33316	-5.56955	-6.80732	-1.33215	-1.8367	-0.441838	0.534798	-4.16739	3.9421
0.265266	0	-19.5867	-0.95606	0	-1.00638	-5.91248	-0.025159	190.885	-97.0401		-1.33316	-5.58698	-6.80817	-1.33215	-1.83759	-0.4471	0.534775	-3.9975	3.85573
0.266156	0	-18.9702	-1.09444	0	-1.00638	-5.33381	0	196.508	-98.99		-1.33316	-5.60386	-6.80914	-1.33215	-1.83849	-0.451847	0.534775	-3.82261	3.76763
0.267046	0	-18.53	-1.20765	0	-0.754784	-4.79288	0	203.402	-100.235		-1.33316	-5.62035	-6.81022	-1.33215	-1.83916	-0.456113	0.534775	-3.64158	3.67842
0.267937	0	-17.9764	-1.15734	0	-0.50319	-5.39671	0	209.667	-101.506		-1.33316	-5.63635	-6.81125	-1.33215	-1.83961	-0.460916	0.534775	-3.45498	3.58808
0.268827	0	-17.5236	-1.10702	0	-0.754784	-5.40929	0	219.34	-102.525		-1.33316	-5.65195	-6.81223	-1.33215	-1.84028	-0.46573	0.534775	-3.25976	3.49684
0.269717	0	-16.9198	-1.1196	0	-0.754784	-2.80528	-0.01258	230.222	-104.097		-1.33316	-5.66701	-6.81323	-1.33215	-1.84095	-0.468227	0.534764	-3.05486	3.40419
0.270607	0	-16.4795	-0.817683	0	-0.754784	-4.45323	-0.037739	242.449	-105.72		-1.33316	-5.68167	-6.81396	-1.33215	-1.84162	-0.47219	0.534731	-2.83908	3.3101
0.271497	0	-16.165	-0.515769	0	-1.00638	-4.45323	-0.062899	257.532	-107.821		-1.33316	-5.69606	-6.81441	-1.33215	-1.84252	-0.476153	0.534675	-2.60988	3.21414
0.272387	0	-15.9134	-0.46545	0	-1.00638	-4.32743	-0.113218	274.188	-109.544		-1.33316	-5.71022	-6.81483	-1.33215	-1.84342	-0.480005	0.534574	-2.36585	3.11664
0.273278	0	-15.5611	-0.578668	0	-1.00638	-4.52871	-0.150957	289.51	-111.016		-1.33316	-5.72407	-6.81534	-1.33215	-1.84431	-0.484035	0.53444	-2.10819	3.01784
0.274168	0	-15.2844	-0.415131	0	-1.00638	-8.51648	-0.176116	299.951	-112.274		-1.33316	-5.73768	-6.81571	-1.33215	-1.84521	-0.491615	0.534283	-1.84123	2.91792
0.275058	0	-15.1208	-0.47803	0	-1.00638	-7.34657	-0.188696	313.94	-113.582		-1.33316	-5.75113	-6.81614	-1.33215	-1.8461	-0.498153	0.534115	-1.56183	2.81683
0.275948	0	-14.9699	-0.528349	0	-1.00638	-8.29005	-0.176116	315.613	-114.149		-1.33316	-5.76446	-6.81661	-1.33215	-1.847	-0.505532	0.533958	-1.28093	2.71524
0.276838	0	-14.6554	-0.540929	0	-1.00638	-7.79944	-0.125797	322.733	-114.262		-1.33316	-5.7775	-6.81709	-1.33215	-1.84789	-0.512473	0.533846	-0.993698	2.61354
0.277728	0	-14.429	-0.452871	0	-1.00638	-7.84976	-0.088058	325.123	-113.834		-1.33316	-5.79034	-6.81749	-1.33215	-1.84879	-0.519459	0.533768	-0.704338	2.51223
0.278618	0	-14.8064	-0.364812	0	-1.00638	-6.32761	-0.050319	329.904	-112.413		-1.33316	-5.80352	-6.81782	-1.33215	-1.84969	-0.525091	0.533723	-0.410724	2.41218
0.279509	0	-14.3912	-0.251595	0	-0.754784	-5.88732	-0.01258	336.206	-110.425		-1.33316	-5.81633	-6.81804	-1.33215	-1.85036	-0.530331	0.533712	-0.111501	2.3139
0.280399	0	-13.6993	-0.188696	0	-0.754784	-4.64192	0	342.873	-108.274		-1.33316	-5.82852	-6.81821	-1.33215	-1.85103	-0.534462	0.533712	0.193657	2.21754
0.281289	0	-13.2213	-0.125797	0	-0.754784	-4.64192	0	340.886	-106.173		-1.33316	-5.84029	-6.81832	-1.33215	-1.8517	-0.538593	0.533712	0.497045	2.12305
0.282179	0	-12.6426	-0.062899	0	-0.754784	-4.64192	0	352.132	-104.374		-1.33316	-5.85154	-6.81838	-1.33215	-1.85237	-0.542725	0.533712	0.810443	2.03015
0.283069	0	-11.5985	-0.075478	0	-0.50319	-4.7803	0	373.581	-102.789		-1.33316	-5.86186	-6.81845	-1.33215	-1.85282	-0.546979	0.533712	1.14293	1.93867
0.283959	0	-11.5356	-0.201276	0	-0.754784	-5.7741	0	389.066	-101.305		-1.33316	-5.87213	-6.81862	-1.33215	-1.85349	-0.552118	0.533712	1.4892	1.84851
0.28485	0	-12.0891	-0.251595	0	-0.754784	-7.09497	0	413.609	-100.248		-1.33316	-5.88289	-6.81885	-1.33215	-1.85416	-0.558432	0.533712	1.85731	1.75929
0.28574	0	-12.1898	-0.251595	0	-1.00638	-8.10135	0	431.485	-99.0906		-1.33316	-5.89374	-6.81907	-1.33215	-1.85506	-0.565643	0.533712	2.24133	1.6711
0.28663	0	-12.0137	-0.213856	0	-0.654146	-7.13271	0	443.486	-97.2917		-1.33316	-5.90443	-6.81926	-1.33215	-1.85564	-0.571991	0.533712	2.63603	1.58451
0.28752	-0.025159	-11.7621	-0.176116	0	0.113218	-8.37811	0	445.675	-96.4866		-1.33318	-5.9149	-6.81942	-1.33215	-1.85554	-0.579447	0.533712	3.03269	1.49864
0.28841	-0.062899	-11.3847	-0.050319	0	1.47183	-8.35295	0	437.247	-95.8828		-1.33324	-5.92503	-6.81946	-1.33215	-1.85423	-0.586881	0.533712	3.42183	1.4133
0.2893	-0.125797	-10.4286	0	0	2.50337	-6.86854	0	424.981	-94.8261		-1.33335	-5.93431	-6.81946	-1.33215	-1.852	-0.592994	0.533712	3.80007	1.32891
0.29019	-0.163537	-10.0009	0	0	3.37137	-6.23955	0	411.785	-93.9078		-1.3335	-5.94321	-6.81946	-1.33215	-1.849	-0.598548	0.533712	4.16656	1.24533
0.291081	-0.201276	-9.90025	0	0	3.93746	-7.00692	0	385.38	-93.4046		-1.33367	-5.95202	-6.81946	-1.33215	-1.8455	-0.604784	0.533712	4.50955	1.1622
0.291971	-0.188696	-9.8122	0	0	3.6607	-6.00054	0	375.908	-92.1592		-1.33384	-5.96076	-6.81946	-1.33215	-1.84224	-0.610124	0.533712	4.8441	1.08018
0.292861	-0.150957	-9.57318	0	0	3.14493	-5.49735	0	367.404	-90.5867		-1.33398	-5.96928	-6.81946	-1.33215	-1.83944	-0.615017	0.533712	5.17109	0.999554
0.293751	-0.088058	-9.4977	-0.025159	0	3.23299	-5.49735	0	378.323	-88.9513		-1.33406	-5.97773	-6.81949	-1.33215	-1.83656	-0.61991	0.533712	5.5078	0.920387
0.294641	-0.050319	-9.42222	-0.025159	0	4.17647	-5.11995	0	390.387	-87.2405		-1.3341	-5.98611	-6.81951	-1.33215	-1.83285	-0.624466	0.533712	5.85525	0.842743
0.295531	-0.01258	-9.32159	-0.025159	0	5.27091	-5.61056	0	403.948	-85.4793		-1.33411	-5.99441	-6.81953	-1.33215	-1.82816	-0.62946	0.533712	6.21476	0.766666
0.296422	0	-9.13289	-0.025159	0	6.56662	-4.64192	0	319.727	-84.1585		-1.33411	-6.00254	-6.81955	-1.33215	-1.82231	-0.633591	0.533712	6.49932	0.691765
0.297312	0	-9.04483	-0.025159	0	7.8246	-4.15131	0	317.55	-82.8502		-1.33411	-6.01059	-6.81958	-1.33215	-1.81535	-0.637286	0.533712	6.78194	0.618029
0.298202	0	-8.96935	-0.025159	0	8.73034	-4.42807	0	299.184	-81.5167		-1.33411	-6.01857	-6.8196	-1.33215	-1.80758	-0.641227	0.533712	7.04821	0.545479
0.299092	0	-9.05741	-0.062899	0	8.90646	-4.69224	0	265.445	-80.0826		-1.33411	-6.02663	-6.81965	-1.33215	-1.79965	-0.645403	0.533712	7.28446	0.474205
0.299982	0	-9.00709	-0.100638	0	8.98193	-2.71722	0	229.178	-79.0762		-1.33411	-6.03465	-6.81974	-1.33215	-1.79166	-0.647821	0.533712	7.48842	0.403827
0.300872	0	-8.90646	-0.100638	0	8.98193	-0.47803	0	263.093	-77.5541		-1.33411	-6.04258	-6.81983	-1.33215	-1.78366	-0.648247	0.533712	7.72258	0.334804
0.301763	0	-8.54164	-0.100638	0	8.85614	0.767364	0	219.026	-76.2458		-1.33411	-6.05018	-6.81992	-1.33215	-1.77578	-0.647564	0.533712	7.91751	0.266945
0.302653	0	-8.41585	-0.075478	0	8.6297	3.19525	0	178.532	-75.1765		-1.33411	-6.05767	-6.81999	-1.33215	-1.7681	-0.64472	0.533712	8.0764	0.200038
0.303543	0	-7.86234	-0.100638	0	8.07619	3.49717	0	159.373	-74.0318		-1.33411	-6.06467	-6.82008	-1.33215	-1.76091	-0.641607	0.533712	8.21824	0.13415
0.304433	0	-7.68622	-0.188696	0	7.39689	6.8937	0	155.624	-72.497		-1.33411	-6.07151	-6.82025	-1.33215	-1.75433	-0.635472	0.533712	8.35675	0.0696277
0.305323	0	-7.51011	-0.276754	0	6.78048	8.49132	0	148.466	-71.3649		-1.33411	-6.07819	-6.82049	-1.33215	-1.7483	-0.627915	0.533712	8.48888	0.006113
0.306213	0	-7.6359	-0.301914	0	6.18923	12.8188	0	135.534	-69.8805		-1.33411	-6.08499	-6.82076	-1.33215	-1.74279	-0.616506	0.533712	8.60951	-0.0560806
0.307103	0	-7.54784	-0.301914	0	5.82442	19.9011	0	121.986	-68.3331		-1.33411	-6.0917	-6.82103	-1.33215	-1.7376	-0.598794	0.533712	8.71808	-0.116897
0.307994	0	-7.64848	-0.239015	0	6.11375	29.1473	0	96.4992	-66.962		-1.33411	-6.09851	-6.82124	-1.33215	-1.73216	-0.572853	0.533712	8.80396	-0.176493
0.308884	0	-7.28367	-0.113218	0	6.13891	40.2048	0	78.3466	-66.4839		-1.33411	-6.10499	-6.82135	-1.33215	-1.7267	-0.537071	0.533712	8.87369	-0.235664
0.309774	0	-6.86854	-0.025159	0	6.27729	51.0989	0	59.7538	-64.8863		-1.33411	-6.11111	-6.82137	-1.33215	-1.72111	-0.491593	0.533712	8.92687	-0.293413
0.310664	0	-6.28987	0	0	6.45341	61.4772	0	40.4942	-63.2761		-1.33411	-6.1167	-6.82137	-1.33215	-1.71537	-0.436878	0.533712	8.96291	-0.349728
0.311554	0	-5.72378	0	0	6.73016	65.8801	0	21.2975	-61.6533		-1.33411	-6.1218	-6.82137	-1.33215	-1.70938	-0.378245	0.533712	8.98186	-0.4046
0.312444	0	-5.15769	0	0	6.62952	65.3014	0	11.5482	-60.0305		-1.33411	-6.12639	-6.82137	-1.33215	-1.70348	-0.320126	0.533712	8.99214	-0.458027
0.313335	0	-4.85578	-0.037739	0	6.71758	61.5275	0	-8.59196	-57.4642		-1.33411	-6.13071	-6.8214	-1.33215	-1.6975	-0.265367	0.533712	8.9845	-0.50917
0.314225	0	-4.76772	-0.075478	0	6.67984	58.1561	0	-13.9384	-56.1434		-1.33411	-6.13495	-6.82147	-1.33215	-1.69155	-0.213608	0.533712	8.97209	-0.559138
0.315115	0	-4.72998	-0.113218	0	6.42825	51.7656	0	-16.7814	-54.7722		-1.33411	-6.13916	-6.82157	-1.33215	-1.68583	-0.167536	0.533712	8.95716	-0.607885
0.316005	0	-4.6545	-0.201276	0	6.08859	46.4696	0	-28.8202	-53.5771		-1.33411	-6.14331	-6.82175	-1.33215	-1.68041	-0.126179	0.533712	8.93151	-0.655569
0.316895	0	-4.40291	-0.201276	0	5.87474	47.1237	0	-29.7133	-52.2185		-1.33411	-6.14722	-6.82193	-1.33215	-1.67519	-0.0842385	0.533712	8.90506	-0.702043
0.317785	0	-4.101	-0.163537	0	5.57282	44.7713	0	-34.8081	-51.0989		-1.33411	-6.15087	-6.82207	-1.33215	-1.67023	-0.044392	0.533712	8.87408	-0.747521
0.318675	0	-3.7865	-0.125797	0	5.28349	43.4882	0	-41.9786	-49.9416		-1.33411	-6.15424	-6.82218	-1.33215	-1.66552	-0.00568755	0.533712	8.83672	-0.791969
0.319566	0	-3.47201	-0.088058	0	5.04448	42.2428	0	-44.1046	-48.822		-1.33411	-6.15733	-6.82226	-1.33215	-1.66103	0.0319085	0.533712	8.79747	-0.835421
0.320456	0	-3.08204	0	0	4.51613	44.8594	0	-44.6455	-47.5137		-1.33411	-6.16008	-6.82226	-1.33215	-1.65701	0.0718333	0.533712	8.75773	-0.877708
0.321346	0	-3.00656	0	0	3.77392	47.8659	-0.01258	-50.8725	-46.3563		-1.33411	-6.16275	-6.82226	-1.33215	-1.65366	0.114434	0.533701	8.71246	-0.918965
0.322236	0	-2.9185	0	0	3.49717	48.9603	-0.025159	-62.9742	-44.9726		-1.33411	-6.16535	-6.82226	-1.33215	-1.65054	0.158009	0.533678	8.65641	-0.958991
0.323126	0	-2.7298	0	0	3.05688	50.4322	-0.050319	-72.497	-43.0982		-1.33411	-6.16778	-6.82226	-1.33215	-1.64782	0.202893	0.533633	8.59189	-0.997348
0.324016	0	-2.55369	0	0	2.61659	53.879	-0.062899	-84.4855	-40.7584		-1.33411	-6.17005	-6.82226	-1.33215	-1.64549	0.250846	0.533577	8.51669	-1.03362
0.324907	-0.01258	-2.41531	0	0	2.13856	54.3822	-0.075478	-90.6496	-37.7015		-1.33412	-6.1722	-6.82226	-1.33215	-1.64359	0.299246	0.53351	8.43602	-1.06718
0.325797	-0.050319	-2.06308	0	0	1.76116	52.1682	-0.075478	-106.286	-33.6508		-1.33417	-6.17404	-6.82226	-1.33215	-1.64202	0.345676	0.533443	8.34142	-1.09713
0.326687	-0.113218	-1.8618	0	0	1.16992	50.7592	-0.062899	-116.941	-28.7699		-1.33427	-6.1757	-6.82226	-1.33215	-1.64098	0.390851	0.533387	8.23734	-1.12273
0.327577	-0.176116	-1.67311	0	0	0.666726	48.8974	-0.037739	-122.791	-23.4235		-1.33443	-6.17719	-6.82226	-1.33215	-1.64039	0.43437	0.533354	8.12806	-1.14358
0.328467	-0.239015	-1.55989	0	0	0.314493	45.2367	-0.025159	-119.08	-18.0016		-1.33464	-6.17857	-6.82226	-1.33215	-1.64011	0.474631	0.533331	8.02208	-1.1596
0.329357	-0.289334	-1.64795	-0.01258	0	0.389972	42.1044	-0.01258	-125.043	-12.2149		-1.3349	-6.18004	-6.82227	-1.33215	-1.63976	0.512104	0.53332	7.91079	-1.17047
0.330247	-0.314493	-1.9247	-0.01258	0	0.49061	39.8904	0	-122.225	-7.43463		-1.33518	-6.18175	-6.82229	-1.33215	-1.63932	0.547606	0.53332	7.80201	-1.17709
0.331138	-0.314493	-1.9876	-0.025159	0	0.239015	38.2298	0	-118.853	-2.46563		-1.33546	-6.18352	-6.82231	-1.33215	-1.63911	0.581631	0.53332	7.69623	-1.17928
0.332028	-0.314493	-2.12598	-0.050319	0	0.037739	35.3365	0	-110.022	2.26435		-1.33573	-6.18541	-6.82235	-1.33215	-1.63908	0.61308	0.53332	7.59831	-1.17727
0.332918	-0.301914	-2.21403	-0.050319	0	-0.201276	34.1917	0	-104.072	7.17045		-1.336	-6.18738	-6.8224	-1.33215	-1.63926	0.643511	0.53332	7.50569	-1.17089
0.333808	-0.251595	-2.1134	-0.037739	0	-0.830263	32.5689	0	-88.1714	12.0388		-1.33623	-6.18927	-6.82243	-1.33215	-1.64	0.672497	0.53332	7.42721	-1.16017
0.334698	-0.188696	-1.97502	-0.037739	0	-1.45925	30.9462	0	-65.075	17.511		-1.3364	-6.19102	-6.82246	-1.33215	-1.6413	0.700039	0.53332	7.3693	-1.14459
0.335588	-0.125797	-1.97502	-0.025159	0	-1.81148	29.5372	0	-28.3925	22.8196		-1.33651	-6.19278	-6.82249	-1.33215	-1.64291	0.726327	0.53332	7.34403	-1.12428
0.336479	-0.062899	-2.06308	0	0	-2.10082	28.3799	0	17.4984	28.9963		-1.33656	-6.19462	-6.82249	-1.33215	-1.64478	0.751585	0.53332	7.3596	-1.09847
0.337369	-0.01258	-2.15114	0	0	-2.10082	27.3987	0	67.679	35.261		-1.33657	-6.19653	-6.82249	-1.33215	-1.64665	0.77597	0.53332	7.41984	-1.06709
0.338259	0	-2.15114	0	0	-1.8618	26.2665	0	122.439	41.5635		-1.33657	-6.19845	-6.82249	-1.33215	-1.6483	0.799347	0.53332	7.52881	-1.0301
0.339149	0	-2.18887	0	0	-1.53473	25.2727	0	165.814	48.1804		-1.33657	-6.20039	-6.82249	-1.33215	-1.64967	0.82184	0.53332	7.67638	-0.987216
0.340039	0	-2.15114	0	0	-1.28313	24.5934	0	193.703	54.5583		-1.33657	-6.20231	-6.82249	-1.33215	-1.65081	0.843728	0.53332	7.84878	-0.938659
0.340929	0	-1.76116	0	0	-1.08186	23.9015	0	198.332	61.0495		-1.33657	-6.20388	-6.82249	-1.33215	-1.65177	0.865001	0.53332	8.02529	-0.884325
0.341819	0	-1.37119	0	0	-1.1196	22.2536	0	195.628	67.8048		-1.33657	-6.2051	-6.82249	-1.33215	-1.65277	0.884806	0.53332	8.1994	-0.823978
0.34271	-0.01258	-0.98122	0	0	-1.16992	20.5553	0	183.337	74.4469		-1.33659	-6.20597	-6.82249	-1.33215	-1.65381	0.9031	0.53332	8.36257	-0.757721
0.3436	-0.037739	-0.566088	0	0	-1.14476	19.6118	0	174.255	80.1707		-1.33662	-6.20647	-6.82249	-1.33215	-1.65483	0.920555	0.53332	8.51766	-0.686369
0.34449	-0.062899	-0.226435	0	0	-0.754784	18.3916	0	166.367	86.4228		-1.33668	-6.20668	-6.82249	-1.33215	-1.6555	0.936923	0.53332	8.66572	-0.609453
0.34538	-0.100638	-0.138377	0	0	-0.364812	17.1839	0	158.417	93.6813		-1.33677	-6.2068	-6.82249	-1.33215	-1.65583	0.952217	0.53332	8.80672	-0.526076
0.34627	-0.125797	-0.025159	-0.251595	0	0.01258	16.7059	0	149.359	100.323		-1.33688	-6.20682	-6.82271	-1.33215	-1.65582	0.967085	0.53332	8.93964	-0.436788
0.34716	-0.150957	-0.062899	-0.50319	0	0.289334	16.0769	0	142.654	107.116		-1.33701	-6.20688	-6.82316	-1.33215	-1.65556	0.981394	0.53332	9.06661	-0.341455
0.348051	-0.163537	-0.062899	-0.754784	0	0.427711	15.1837	0	135.71	114.929		-1.33716	-6.20693	-6.82383	-1.33215	-1.65518	0.994907	0.53332	9.18739	-0.239168
0.348941	-0.176116	-0.050319	-1.00638	0	0.289334	14.2025	0	127.823	122.904		-1.33731	-6.20698	-6.82473	-1.33215	-1.65492	1.00755	0.53332	9.30115	-0.129784
0.349831	-0.163537	-0.050319	-1.50957	0	0.150957	13.5232	0	120.464	129.181		-1.33746	-6.20702	-6.82607	-1.33215	-1.65479	1.01958	0.53332	9.40836	-0.0148123
0.350721	-0.176116	-0.050319	-1.76116	0	0.025159	12.5797	0	114.526	136.754		-1.33762	-6.20707	-6.82764	-1.33215	-1.65476	1.03078	0.53332	9.51029	0.106899
0.351611	-0.163537	-0.264175	-2.01276	0	-0.251595	11.7746	0	107.733	144.365		-1.33776	-6.2073	-6.82943	-1.33215	-1.65499	1.04126	0.53332	9.60617	0.235384
0.352501	-0.150957	-0.528349	-2.01276	0	-0.49061	10.8437	-0.062899	101.707	151.875		-1.3379	-6.20777	-6.83122	-1.33215	-1.65542	1.05091	0.533264	9.69669	0.370553
0.353391	-0.125797	-0.779944	-2.01276	0	-0.729625	10.2776	-0.251595	97.2917	158.731		-1.33801	-6.20847	-6.83301	-1.33215	-1.65607	1.06006	0.53304	9.78328	0.511824
0.354282	-0.125797	-1.27055	-1.76116	0	-0.95606	9.57318	-0.628987	93.3291	166.858		-1.33812	-6.2096	-6.83458	-1.33215	-1.65692	1.06858	0.53248	9.86635	0.660327
0.355172	-0.088058	-1.77374	-1.50957	0	-1.1825	9.20837	-0.855422	89.0142	173.563		-1.3382	-6.21118	-6.83592	-1.33215	-1.65798	1.07677	0.531719	9.94557	0.814798
0.356062	-0.062899	-1.83664	-1.25797	0	-1.16992	9.18321	-0.855422	85.4416	179.903		-1.33825	-6.21281	-6.83704	-1.33215	-1.65902	1.08495	0.530958	10.0216	0.974911
0.356952	-0.037739	-1.83664	-1.48441	0	-1.16992	8.90646	-0.792524	80.9003	185.954		-1.33829	-6.21445	-6.83836	-1.33215	-1.66006	1.09287	0.530252	10.0936	1.14041
0.357842	-0.025159	-1.9247	-1.71084	0	-1.1825	8.36553	-0.603827	77.1012	193.25		-1.33831	-6.21616	-6.83989	-1.33215	-1.66111	1.10032	0.529715	10.1622	1.3124
0.358732	0	-1.7989	-1.93728	0	-1.19508	7.93782	-0.226435	72.4341	198.143		-1.33831	-6.21776	-6.84161	-1.33215	-1.66218	1.10738	0.529513	10.2267	1.48875
0.359623	0	-1.62279	-2.16371	0	-1.22023	7.14529	0	68.7609	203.603		-1.33831	-6.2192	-6.84354	-1.33215	-1.66326	1.11374	0.529513	10.2879	1.66996
0.360513	0	-1.57247	-2.39015	0	-1.23281	6.23955	0	64.8989	209.792		-1.33831	-6.2206	-6.84566	-1.33215	-1.66436	1.11929	0.529513	10.3457	1.85667
0.361403	0	-1.55989	-2.41531	0	-1.24539	5.59798	0	61.8923	215.755		-1.33831	-6.22199	-6.84781	-1.33215	-1.66547	1.12428	0.529513	10.4007	2.04869
0.362293	0	-1.47183	-2.44047	0	-1.24539	4.89352	0	58.2316	219.353		-1.33831	-6.2233	-6.84998	-1.33215	-1.66658	1.12863	0.529513	10.4526	2.24392
0.363183	0	-1.34603	-2.44047	0	-1.25797	4.13873	0	55.6024	227.215		-1.33831	-6.2245	-6.85216	-1.33215	-1.6677	1.13232	0.529513	10.5021	2.44614
0.364073	0	-1.27055	-2.67949	0	-1.00638	3.29589	0	52.4198	234.184		-1.33831	-6.22563	-6.85454	-1.33215	-1.66859	1.13525	0.529513	10.5487	2.65456
0.364964	0	-1.25797	-2.9185	0	-0.754784	2.57885	0	48.432	240.386		-1.33831	-6.22675	-6.85714	-1.33215	-1.66926	1.13754	0.529513	10.5918	2.86851
0.365854	0	-1.25797	-3.14493	0	-0.50319	2.35241	0	45.8028	250.337		-1.33831	-6.22787	-6.85994	-1.33215	-1.66971	1.13964	0.529513	10.6326	3.09131
0.366744	0	-1.03154	-3.39653	0	-0.251595	2.28951	-0.01258	43.4882	262.841		-1.33831	-6.22879	-6.86296	-1.33215	-1.66993	1.14168	0.529502	10.6713	3.32524
0.367634	0	-0.779944	-3.67328	0	0	2.26435	-0.025159	41.4125	279.421		-1.33831	-6.22948	-6.86623	-1.33215	-1.66993	1.14369	0.52948	10.7081	3.57392
0.368524	0	-0.779944	-3.71102	0	0	2.9185	-0.037739	39.4626	295.133		-1.33831	-6.23018	-6.86953	-1.33215	-1.66993	1.14629	0.529446	10.7433	3.83659
0.369414	0	-0.779944	-3.74876	0	0	3.37137	-0.075478	38.733	316.368		-1.33831	-6.23087	-6.87287	-1.33215	-1.66993	1.14929	0.529379	10.7777	4.11816
0.370304	0	-0.779944	-4.02552	0	0	3.30847	-0.100638	37.1228	339.917		-1.33831	-6.23156	-6.87645	-1.33215	-1.66993	1.15223	0.529289	10.8108	4.42068
0.371195	0	-1.00638	-4.02552	0	0	3.33363	-0.088058	35.1478	352.711		-1.33831	-6.23246	-6.88003	-1.33215	-1.66993	1.1552	0.529211	10.8421	4.7346
0.372085	0	-1.28313	-4.02552	0	0	3.01914	-0.075478	33.2231	354.447		-1.33831	-6.2336	-6.88362	-1.33215	-1.66993	1.15789	0.529144	10.8716	5.05005
0.372975	0	-1.53473	-4.02552	0	0	2.46563	-0.062899	31.5122	356.736		-1.33831	-6.23497	-6.8872	-1.33215	-1.66993	1.16008	0.529088	10.8997	5.36755
0.373865	0	-1.78632	-4.02552	0	-0.251595	1.9247	-0.025159	29.7008	358.082		-1.33831	-6.23656	-6.89078	-1.33215	-1.67016	1.16179	0.529065	10.9261	5.68624
0.374755	0	-2.28951	-3.77392	0	-0.251595	1.69826	0	28.0528	356.812		-1.33831	-6.2386	-6.89414	-1.33215	-1.67038	1.16331	0.529065	10.9511	6.0038
0.375645	0	-2.80528	-3.77392	0	-0.251595	1.32087	0	26.6187	355.818		-1.33831	-6.24109	-6.8975	-1.33215	-1.67061	1.16448	0.529065	10.9748	6.32048
0.376536	0	-3.53491	-3.77392	0	-0.251595	1.38377	0	25.3859	372.411		-1.33831	-6.24424	-6.90086	-1.33215	-1.67083	1.16571	0.529065	10.9974	6.65193
0.377426	0	-4.28969	-3.77392	0	-0.251595	1.33345	0	24.455	391.708		-1.33831	-6.24806	-6.90422	-1.33215	-1.67105	1.1669	0.529065	11.0191	7.00055
0.378316	0	-5.04448	-3.77392	0	0	1.27055	0	23.7505	414.1		-1.33831	-6.25255	-6.90758	-1.33215	-1.67105	1.16803	0.529065	11.0403	7.3691
0.379206	0	-5.50993	-3.52233	0	0	0.98122	0	22.8825	419.056		-1.33831	-6.25745	-6.91071	-1.33215	-1.67105	1.1689	0.529065	11.0606	7.74206
0.380096	0	-5.9628	-3.27073	0	0	0.893162	0	21.3856	431.145		-1.33831	-6.26276	-6.91362	-1.33215	-1.67105	1.1697	0.529065	11.0797	8.12578
0.380986	0	-6.01312	-3.01914	0	0	0.616407	-0.025159	20.5805	417.798		-1.33831	-6.26811	-6.91631	-1.33215	-1.67105	1.17025	0.529043	11.098	8.49762
0.381876	0	-5.79926	-2.76754	0	0	0.47803	-0.025159	19.5112	405.772		-1.33831	-6.27327	-6.91877	-1.33215	-1.67105	1.17067	0.529021	11.1153	8.85875
0.382767	0	-5.29607	-2.51595	0	0	0.427711	-0.025159	18.4796	396.035		-1.33831	-6.27798	-6.92101	-1.33215	-1.67105	1.17105	0.528998	11.1318	9.21123
0.383657	0	-4.83062	-2.51595	0	0	0.402552	-0.025159	17.3475	407.068		-1.33831	-6.28228	-6.92325	-1.33215	-1.67105	1.17141	0.528976	11.1472	9.57352
0.384547	0	-4.15131	-2.51595	0	0	-0.251595	0.037739	16.9826	393.897		-1.33831	-6.28598	-6.92549	-1.33215	-1.67105	1.17119	0.52901	11.1623	9.92408
0.385437	0	-3.59781	-2.51595	0	0	-1.0567	0.94348	15.8756	431.611		-1.33831	-6.28918	-6.92773	-1.33215	-1.67105	1.17025	0.529849	11.1765	10.3082
0.386327	0	-2.80528	-2.51595	0	0	-1.8618	2.94366	14.8441	394.74		-1.33831	-6.29168	-6.92997	-1.33215	-1.67105	1.16859	0.532469	11.1897	10.6595
0.387217	0	-2.30209	-2.52853	0	0	-2.9185	5.20801	13.9006	406.514		-1.33831	-6.29372	-6.93222	-1.33215	-1.67105	1.16599	0.537104	11.202	11.0213
0.388108	0	-1.7989	-2.55369	0	0	-3.7236	7.62332	13.2968	331.212		-1.33831	-6.29532	-6.93449	-1.33215	-1.67105	1.16268	0.543889	11.2139	11.3161
0.388998	0	-1.50957	-2.56627	0	0	-3.48459	9.97573	12.7559	333.3		-1.33831	-6.29667	-6.93678	-1.33215	-1.67105	1.15958	0.552767	11.2252	11.6127
0.389888	0	-1.29571	-2.56627	0	0	-2.75496	11.5105	12.4414	290.277		-1.33831	-6.29782	-6.93906	-1.33215	-1.67105	1.15713	0.563012	11.2363	11.8711
0.390778	0	-1.33345	-2.57885	0	0	-2.00018	11.9256	12.3156	307.738		-1.33831	-6.29901	-6.94135	-1.33215	-1.67105	1.15535	0.573625	11.2473	12.145
0.391668	0	-1.33345	-2.56627	0	0	-0.993799	12.0514	12.2023	255.13		-1.33831	-6.3002	-6.94364	-1.33215	-1.67105	1.15446	0.584351	11.2581	12.372
0.392558	0	-1.61021	-2.54111	0	0	-0.226435	11.9633	12.1394	274.377		-1.33831	-6.30163	-6.9459	-1.33215	-1.67105	1.15426	0.594999	11.2689	12.6162
0.393448	0	-1.8618	-2.52853	0	0	0.037739	11.9633	12.1143	251.331		-1.33831	-6.30329	-6.94815	-1.33215	-1.67105	1.15429	0.605646	11.2797	12.8399
0.394339	0	-1.82406	-2.52853	0	0	0.062899	11.9633	12.0891	221.68		-1.33831	-6.30491	-6.9504	-1.33215	-1.67105	1.15435	0.616293	11.2905	13.0372
0.395229	0	-1.78632	-2.51595	0	0	0.062899	11.8627	12.0514	195.011		-1.33831	-6.3065	-6.95264	-1.33215	-1.67105	1.15441	0.626851	11.3012	13.2108
0.396119	0	-1.78632	-2.51595	0	0	0.062899	11.825	12.0262	166.744		-1.33831	-6.30809	-6.95488	-1.33215	-1.67105	1.15446	0.637375	11.3119	13.3592
0.397009	0	-1.50957	-2.51595	0	0	0.050319	11.9004	12.0011	172.795		-1.33831	-6.30943	-6.95712	-1.33215	-1.67105	1.15451	0.647967	11.3226	13.513
0.397899	0	-1.25797	-2.51595	0	0	-0.226435	11.9004	11.8627	157.423		-1.33831	-6.31055	-6.95936	-1.33215	-1.67105	1.1543	0.658558	11.3331	13.6531
0.398789	0	-1.25797	-2.51595	0	0	-0.50319	11.8753	11.6614	152.655		-1.33831	-6.31167	-6.9616	-1.33215	-1.67105	1.15386	0.669127	11.3435	13.7889
0.39968	0	-1.25797	-2.51595	0	0	-0.754784	11.9508	11.5356	141.019		-1.33831	-6.31279	-6.96384	-1.33215	-1.67105	1.15318	0.679763	11.3538	13.9145
0.40057	0	-1.25797	-2.51595	0	0	-1.00638	11.9885	11.435	149.233		-1.33831	-6.31391	-6.96608	-1.33215	-1.67105	1.15229	0.690433	11.364	14.0473
0.40146	0	-1.30829	-2.51595	0	0	-1.25797	11.9508	11.3721	130.364		-1.33831	-6.31507	-6.96831	-1.33215	-1.67105	1.15117	0.701069	11.3741	14.1633
0.40235	0	-1.37119	-2.51595	0	0	-1.00638	11.913	11.3847	117.369		-1.33831	-6.3163	-6.97055	-1.33215	-1.67105	1.15027	0.711672	11.3842	14.2678
0.40324	0	-1.39635	-2.51595	0	0	-0.754784	11.7998	11.4098	98.6881		-1.33831	-6.31754	-6.97279	-1.33215	-1.67105	1.1496	0.722174	11.3944	14.3556
0.40413	0	-1.39635	-2.51595	0	0	-0.452871	11.5482	11.284	89.8822		-1.33831	-6.31878	-6.97503	-1.33215	-1.67105	1.1492	0.732451	11.4044	14.4356
0.40502	0	-1.39635	-2.51595	0	0	-0.201276	11.284	11.196	81.4161		-1.33831	-6.32002	-6.97727	-1.33215	-1.67105	1.14902	0.742494	11.4144	14.508
0.405911	0	-1.34603	-2.26435	0	0	0.050319	10.8312	11.045	62.8484		-1.33831	-6.32122	-6.97929	-1.33215	-1.67105	1.14906	0.752134	11.4242	14.564
0.406801	0	-1.28313	-2.01276	0	0	0.050319	10.4915	10.8312	43.4127		-1.33831	-6.32236	-6.98108	-1.33215	-1.67105	1.14911	0.761471	11.4338	14.6026
0.407691	0	-1.27055	-1.76116	0	0	0.050319	10.2273	10.416	30.4304		-1.33831	-6.32349	-6.98265	-1.33215	-1.67105	1.14915	0.770574	11.4431	14.6297
0.408581	0	-1.29571	-1.50957	0	0	-0.50319	9.98831	10.3531	14.127		-1.33831	-6.32465	-6.98399	-1.33215	-1.67105	1.14871	0.779463	11.4523	14.6423
0.409471	0	-1.29571	-1.25797	0	0	-1.00638	9.64866	10.1896	-13.4477		-1.33831	-6.3258	-6.98511	-1.33215	-1.67105	1.14781	0.788051	11.4614	14.6303
0.410361	0	-1.29571	-1.25797	0	0	-1.00638	9.61092	9.82478	-23.3606		-1.33831	-6.32695	-6.98623	-1.33215	-1.67105	1.14691	0.796604	11.4701	14.6095
0.411252	0	-1.29571	-1.25797	0	0	-1.00638	9.44738	9.66124	-29.8014		-1.33831	-6.32811	-6.98735	-1.33215	-1.67105	1.14602	0.805013	11.4787	14.583
0.412142	0	-1.28313	-1.25797	0	0	-1.04412	9.06999	9.61092	-43.1108		-1.33831	-6.32925	-6.98847	-1.33215	-1.67105	1.14509	0.813085	11.4873	14.5446
0.413032	0	-1.25797	-1.25797	0	0	-0.591248	8.6297	9.24611	-42.3811		-1.33831	-6.33037	-6.98959	-1.33215	-1.67105	1.14456	0.820765	11.4955	14.5069
0.413922	0	-1.25797	-1.25797	0	0	-0.088058	8.18941	8.57938	-36.4183		-1.33831	-6.33149	-6.99071	-1.33215	-1.67105	1.14449	0.828054	11.5032	14.4745
0.414812	0	-1.25797	-1.25797	0	0	-0.050319	7.72396	8.23973	-48.4446		-1.33831	-6.33261	-6.99183	-1.33215	-1.67105	1.14444	0.834928	11.5105	14.4314
0.415702	0	-1.25797	-1.25797	0	0	-0.050319	7.24593	7.97555	-54.6212		-1.33831	-6.33373	-6.99295	-1.33215	-1.67105	1.1444	0.841377	11.5176	14.3828
0.416592	0	-1.28313	-1.25797	0	0	-0.01258	6.78048	7.62332	-49.3503		-1.33831	-6.33487	-6.99407	-1.33215	-1.67105	1.14438	0.847412	11.5244	14.3388
0.417483	0	-1.32087	-1.25797	0	0	0.037739	6.17665	7.25851	-55.8415		-1.33831	-6.33604	-6.99518	-1.33215	-1.67105	1.14442	0.852909	11.5308	14.2891
0.418373	0	-1.35861	-1.25797	0	0	0.037739	5.29607	7.15787	-53.9168		-1.33831	-6.33725	-6.9963	-1.33215	-1.67105	1.14445	0.857622	11.5372	14.2411
0.419263	0	-1.38377	-1.25797	0	0	0	3.98778	6.90628	-43.0227		-1.33831	-6.33849	-6.99742	-1.33215	-1.67105	1.14445	0.861171	11.5434	14.2029
0.420153	0	-1.40893	-1.25797	0	0	0	2.6669	6.56662	-17.5613		-1.33831	-6.33974	-6.99854	-1.33215	-1.67105	1.14445	0.863545	11.5492	14.1872
0.421043	0	-1.42151	-1.25797	0	0	0	1.54731	6.35277	6.02569		-1.33831	-6.341	-6.99966	-1.33215	-1.67105	1.14445	0.864922	11.5549	14.1926
0.421933	0	-1.40893	-1.25797	0	0	0	0.691886	6.00054	35.2484		-1.33831	-6.34226	-7.00078	-1.33215	-1.67105	1.14445	0.865538	11.5602	14.224
0.422824	0	-1.40893	-1.25797	0	0	0	-0.01258	5.73636	67.9432		-1.33831	-6.34351	-7.0019	-1.33215	-1.67105	1.14445	0.865527	11.5653	14.2844
0.423714	0	-1.38377	-1.25797	0	0	0	-2.52853	5.53508	109.255		-1.33831	-6.34474	-7.00302	-1.33215	-1.67105	1.14445	0.863276	11.5702	14.3817
0.424604	0	-1.35861	-1.25797	0	0	0	-6.12633	5.14511	141.811		-1.33831	-6.34595	-7.00414	-1.33215	-1.67105	1.14445	0.857824	11.5748	14.5079
0.425494	0	-1.32087	-1.25797	0	0	0	-10.9066	4.7803	173.764		-1.33831	-6.34713	-7.00526	-1.33215	-1.67105	1.14445	0.848117	11.5791	14.6625
0.426384	0	-1.29571	-1.25797	0	-0.251595	0	-15.8882	4.52871	207.402		-1.33831	-6.34828	-7.00638	-1.33215	-1.67128	1.14445	0.833976	11.5831	14.8471
0.427274	0	-1.25797	-1.25797	0	-0.50319	0	-21.3227	4.101	224.762		-1.33831	-6.3494	-7.0075	-1.33215	-1.67173	1.14445	0.814999	11.5867	15.0472
0.428165	0	-1.25797	-1.25797	0	-0.754784	0	-25.4614	3.62297	231.744		-1.33831	-6.35052	-7.00862	-1.33215	-1.6724	1.14445	0.792339	11.59	15.2534
0.429055	0	-1.25797	-1.25797	0	-1.00638	0	-29.0089	3.32105	228.599		-1.33831	-6.35164	-7.00974	-1.33215	-1.67329	1.14445	0.766521	11.5929	15.4569
0.429945	0	-1.27055	-1.25797	0	-1.25797	0	-32.179	3.1072	222.359		-1.33831	-6.35277	-7.01086	-1.33215	-1.67441	1.14445	0.737881	11.5957	15.6548
0.430835	0	-1.27055	-1.25797	0	-1.25797	0	-35.9277	2.93108	211		-1.33831	-6.3539	-7.01198	-1.33215	-1.67553	1.14445	0.705906	11.5983	15.8426
0.431725	0	-1.27055	-1.25797	0	-1.25797	0	-40.0036	2.84302	200.886		-1.33831	-6.35503	-7.0131	-1.33215	-1.67665	1.14445	0.670303	11.6008	16.0213
0.432615	0	-1.27055	-1.00638	0	-1.25797	0	-45.2367	2.80528	191.891		-1.33831	-6.35616	-7.01399	-1.33215	-1.67777	1.14445	0.630042	11.6033	16.1921
0.433505	0	-1.27055	-0.754784	0	-1.25797	0	-52.294	2.69206	181.777		-1.33831	-6.35729	-7.01467	-1.33215	-1.67889	1.14445	0.5835	11.6057	16.3539
0.434396	0	-1.25797	-0.50319	0	-1.25797	-0.037739	-60.7476	2.60401	171.99		-1.33831	-6.35841	-7.01511	-1.33215	-1.68001	1.14442	0.529435	11.608	16.507
0.435286	0	-1.50957	-0.251595	0	-1.25797	-0.088058	-70.4843	2.31467	164.543		-1.33831	-6.35976	-7.01534	-1.33215	-1.68113	1.14434	0.466704	11.6101	16.6534
0.436176	0	-1.76116	0	0	-1.25797	-0.088058	-80.5229	2.1763	156.278		-1.33831	-6.36133	-7.01534	-1.33215	-1.68225	1.14426	0.395039	11.612	16.7925
0.437066	0	-2.01276	0	0	-1.25797	-0.088058	-89.4671	2.06308	148.265		-1.33831	-6.36312	-7.01534	-1.33215	-1.68337	1.14418	0.315413	11.6139	16.9245
0.437956	0	-2.26435	0	0	-1.25797	-0.088058	-96.9269	1.71084	139.786		-1.33831	-6.36513	-7.01534	-1.33215	-1.68449	1.1441	0.229148	11.6154	17.0489
0.438846	0	-2.51595	0	0	-1.25797	-0.050319	-103.154	1.25797	130.817		-1.33831	-6.36737	-7.01534	-1.33215	-1.68561	1.14406	0.137341	11.6165	17.1653
0.439737	0	-2.51595	0	0	-1.24539	0	-108.576	0.993799	120.954		-1.33831	-6.36961	-7.01534	-1.33215	-1.68672	1.14406	0.0407085	11.6174	17.2729
0.440627	0	-2.51595	0	0	-1.24539	0	-113.658	0.704465	111.482		-1.33831	-6.37185	-7.01534	-1.33215	-1.68783	1.14406	-0.060447	11.618	17.3722
0.441517	0	-2.52853	0	0	-1.24539	0	-118.967	0.389972	103.594		-1.33831	-6.3741	-7.01534	-1.33215	-1.68893	1.14406	-0.166327	11.6184	17.4644
0.442407	0	-2.52853	0	0	-1.24539	0	-123.609	0.47803	97.7572		-1.33831	-6.37635	-7.01534	-1.33215	-1.69004	1.14406	-0.276339	11.6188	17.5514
0.443297	0	-2.52853	0	0	-1.24539	0	-127.408	0.603828	91.9705		-1.33831	-6.3786	-7.01534	-1.33215	-1.69115	1.14406	-0.389732	11.6193	17.6332
0.444187	0	-2.52853	-0.251595	0	-1.25797	0	-130.59	1.03154	86.448		-1.33831	-6.38085	-7.01556	-1.33215	-1.69227	1.14406	-0.505957	11.6203	17.7102
0.445077	0	-2.52853	-0.50319	0	-1.25797	0	-133.496	1.43409	81.8815		-1.33831	-6.3831	-7.01601	-1.33215	-1.69339	1.14406	-0.624769	11.6215	17.783
0.445968	0	-2.51595	-0.50319	0	-1.25797	0	-135.132	1.77374	77.9692		-1.33831	-6.38534	-7.01646	-1.33215	-1.69451	1.14406	-0.745036	11.6231	17.8524
0.446858	0	-2.51595	-0.50319	0	-1.25797	0	-137.019	1.72342	74.6356		-1.33831	-6.38758	-7.01691	-1.33215	-1.69563	1.14406	-0.866982	11.6246	17.9189
0.447748	0	-2.26435	-0.754784	0	-1.25797	0	-138.742	1.61021	71.1258		-1.33831	-6.3896	-7.01758	-1.33215	-1.69675	1.14406	-0.990463	11.6261	17.9822
0.448638	0	-2.01276	-0.50319	0	-1.25797	-0.251595	-139.937	1.38377	68.5973		-1.33831	-6.39139	-7.01802	-1.33215	-1.69787	1.14384	-1.11501	11.6273	18.0432
0.449528	0	-1.76116	-0.251595	0	-1.25797	-1.16992	-140.641	1.00638	67.3897		-1.33831	-6.39295	-7.01825	-1.33215	-1.69899	1.14279	-1.24018	11.6282	18.1032
0.450418	0	-1.76116	-0.251595	0	-1.25797	-2.12598	-141.497	0.691886	65.7543		-1.33831	-6.39452	-7.01847	-1.33215	-1.70011	1.1409	-1.36611	11.6288	18.1617
0.451309	0	-1.76116	-0.251595	0	-1.25797	-3.09462	-142.176	0.415131	64.5466		-1.33831	-6.39609	-7.0187	-1.33215	-1.70123	1.13815	-1.49265	11.6292	18.2192
0.452199	0	-1.76116	0	0	-1.25797	-3.8494	-143.51	0.377392	64.8108		-1.33831	-6.39766	-7.0187	-1.33215	-1.70235	1.13472	-1.62037	11.6295	18.2768
0.453089	0	-2.01276	0	0	-1.00638	-4.34001	-143.761	0.201276	65.2888		-1.33831	-6.39945	-7.0187	-1.33215	-1.70324	1.13086	-1.74832	11.6297	18.3349
0.453979	0	-2.26435	0	0	-0.754784	-3.64812	-142.931	0.113218	64.9869		-1.33831	-6.40146	-7.0187	-1.33215	-1.70391	1.12761	-1.87553	11.6298	18.3928
0.454869	0	-2.01276	0	0	-0.50319	-2.90592	-142.994	0.062899	65.1127		-1.33831	-6.40325	-7.0187	-1.33215	-1.70436	1.12503	-2.00279	11.6299	18.4507
0.455759	0	-2.01276	0	0	-0.251595	-1.93728	-143.472	0.239015	65.1127		-1.33831	-6.40505	-7.0187	-1.33215	-1.70459	1.1233	-2.13048	11.6301	18.5087
0.456649	0	-2.26435	0	0.037739	0	-1.22023	-142.617	0.213856	65.1002		-1.33831	-6.40706	-7.0187	-1.33212	-1.70459	1.12222	-2.25741	11.6303	18.5666
0.45754	0	-2.01276	0	0.805103	0	-0.50319	-143.459	0.201276	65.314		-1.33831	-6.40885	-7.0187	-1.3314	-1.70459	1.12177	-2.38509	11.6304	18.6248
0.45843	0	-1.76116	0	2.23919	0	-0.276754	-144.742	0.239015	65.6788		-1.33831	-6.41042	-7.0187	-1.32941	-1.70459	1.12152	-2.51391	11.6307	18.6832
0.45932	0	-1.76116	0	3.9123	0	-0.062899	-144.692	0.201276	66.4713		-1.33831	-6.41199	-7.0187	-1.32593	-1.70459	1.12147	-2.64269	11.6308	18.7424
0.46021	0	-1.50957	0	5.7112	0	-0.062899	-144.088	0.163537	67.1884		-1.33831	-6.41333	-7.0187	-1.32084	-1.70459	1.12141	-2.77092	11.631	18.8022
0.4611	0	-1.25797	0	7.44721	0	-0.025159	-143.61	0.150957	68.1193		-1.33831	-6.41445	-7.0187	-1.31422	-1.70459	1.12139	-2.89874	11.6311	18.8628
0.46199	0	-1.25797	0	8.6297	-0.251595	0	-141.988	0.113218	68.786		-1.33831	-6.41557	-7.0187	-1.30654	-1.70481	1.12139	-3.02511	11.6312	18.924
0.462881	0	-1.25797	0	9.18321	-0.251595	0	-140.101	0.47803	69.2766		-1.33831	-6.41669	-7.0187	-1.29836	-1.70503	1.12139	-3.1498	11.6316	18.9857
0.463771	0	-1.50957	0	9.66124	-0.251595	0	-137.685	2.40273	70.0943		-1.33831	-6.41803	-7.0187	-1.28976	-1.70526	1.12139	-3.27234	11.6338	19.048
0.464661	0	-1.50957	0	10.0386	-0.251595	0	-134.553	4.64192	71.1258		-1.33831	-6.41938	-7.0187	-1.28083	-1.70548	1.12139	-3.39209	11.6379	19.1113
0.465551	0	-1.50957	0	9.71156	-0.251595	0	-131.156	7.00692	72.2454		-1.33831	-6.42072	-7.0187	-1.27219	-1.70571	1.12139	-3.50882	11.6441	19.1756
0.466441	0	-1.50957	0	9.13289	0	0	-127.257	9.40964	73.7928		-1.33831	-6.42206	-7.0187	-1.26406	-1.70571	1.12139	-3.62207	11.6525	19.2413
0.467331	0	-1.50957	0	8.46617	-0.025159	0	-123.382	11.4098	75.6671		-1.33831	-6.42341	-7.0187	-1.25652	-1.70573	1.12139	-3.73188	11.6627	19.3087
0.468221	0	-1.25797	0	8.29005	-0.062899	0	-119.935	11.8753	76.749		-1.33831	-6.42453	-7.0187	-1.24915	-1.70578	1.12139	-3.83863	11.6732	19.377
0.469112	0	-1.25797	0	8.15167	-0.088058	0	-116.036	12.0137	77.378		-1.33831	-6.42565	-7.0187	-1.24189	-1.70586	1.12139	-3.9419	11.6839	19.4458
0.470002	0	-1.25797	0	8.76808	-0.088058	0	-112.639	11.0953	78.4221		-1.33831	-6.42677	-7.0187	-1.23409	-1.70594	1.12139	-4.04215	11.6938	19.5156
0.470892	0	-1.25797	0	9.47254	-0.088058	0	-109.532	8.76808	79.982		-1.33831	-6.42789	-7.0187	-1.22566	-1.70602	1.12139	-4.13963	11.7016	19.5868
0.471782	0	-1.25797	0	10.2147	-0.314493	0	-106.789	6.36535	84.5358		-1.33831	-6.429	-7.0187	-1.21657	-1.7063	1.12139	-4.23467	11.7073	19.6621
0.472672	0	-1.25797	0	10.1393	-0.528349	0	-104.009	3.96262	91.6182		-1.33831	-6.43012	-7.0187	-1.20754	-1.70677	1.12139	-4.32724	11.7108	19.7436
0.473562	0	-1.25797	0	9.86252	-0.754784	0	-101.707	1.58505	101.204		-1.33831	-6.43124	-7.0187	-1.19876	-1.70744	1.12139	-4.41776	11.7122	19.8337
0.474453	0	-1.25797	0	9.33417	-1.00638	0	-98.9271	0.239015	109.092		-1.33831	-6.43236	-7.0187	-1.19046	-1.70834	1.12139	-4.50581	11.7124	19.9308
0.475343	0	-1.25797	0	8.6926	-1.25797	0	-96.5118	0.666726	117.382		-1.33831	-6.43348	-7.0187	-1.18272	-1.70946	1.12139	-4.5917	11.713	20.0352
0.476233	0	-1.00638	0	8.26489	-1.25797	0	-94.2097	1.71084	122.942		-1.33831	-6.43438	-7.0187	-1.17536	-1.71058	1.12139	-4.67555	11.7145	20.1446
0.477123	0	-0.754784	0	7.90008	-1.25797	0	-91.8321	3.50975	125.785		-1.33831	-6.43505	-7.0187	-1.16833	-1.7117	1.12139	-4.75728	11.7177	20.2566
0.478013	0	-0.50319	0	7.61074	-1.25797	0	-89.5048	5.76152	128.615		-1.33831	-6.4355	-7.0187	-1.16156	-1.71282	1.12139	-4.83694	11.7228	20.3711
0.478903	0	-0.251595	0	7.53526	-1.25797	0	-87.7688	7.96298	136.39		-1.33831	-6.43572	-7.0187	-1.15485	-1.71393	1.12139	-4.91505	11.7299	20.4925
0.479793	0	0	0	7.44721	-1.25797	0	-85.8316	9.84994	144.466		-1.33831	-6.43572	-7.0187	-1.14822	-1.71505	1.12139	-4.99144	11.7386	20.621
0.480684	0	0	0	7.15787	-1.25797	0	-83.7685	11.2211	153.599		-1.33831	-6.43572	-7.0187	-1.14185	-1.71617	1.12139	-5.066	11.7486	20.7577
0.481574	0	0	0	6.99434	-1.25797	0	-82.2589	12.4539	163.071		-1.33831	-6.43572	-7.0187	-1.13563	-1.71729	1.12139	-5.13921	11.7597	20.9029
0.482464	0	0	0	6.84338	-1.25797	0	-80.8626	14.0516	173.185		-1.33831	-6.43572	-7.0187	-1.12954	-1.71841	1.12139	-5.21117	11.7722	21.057
0.483354	0	0	0	6.93144	-1.25797	0	-79.4411	16.2404	180.96		-1.33831	-6.43572	-7.0187	-1.12337	-1.71953	1.12139	-5.28188	11.7867	21.2181
0.484244	0	0	0	7.08239	-1.25797	0	-78.3592	18.6054	189.816		-1.33831	-6.43572	-7.0187	-1.11707	-1.72065	1.12139	-5.35162	11.8032	21.387
0.485134	0	0	0	7.10755	-1.25797	0	-77.139	21.1717	199.125		-1.33831	-6.43572	-7.0187	-1.11074	-1.72177	1.12139	-5.42027	11.8221	21.5642
0.486025	0	0	0	7.05723	-1.25797	0	-75.3526	23.4864	209.968		-1.33831	-6.43572	-7.0187	-1.10446	-1.72289	1.12139	-5.48733	11.843	21.7511
0.486915	0	0	0	7.03207	-1.25797	0	-73.6418	25.8765	216.221		-1.33831	-6.43572	-7.0187	-1.0982	-1.72401	1.12139	-5.55288	11.866	21.9435
0.487805	0	0	0	6.705	-1.25797	0	-71.8052	28.0402	218.51		-1.33831	-6.43572	-7.0187	-1.09223	-1.72513	1.12139	-5.61678	11.891	22.138
0.488695	0	-0.226435	0	6.31503	-1.25797	0	-69.7547	30.443	208.396		-1.33831	-6.43592	-7.0187	-1.08661	-1.72625	1.12139	-5.67886	11.9181	22.3235
0.489585	0	-0.452871	0	5.9628	-1.25797	0	-68.1948	32.9463	189.803		-1.33831	-6.43633	-7.0187	-1.08131	-1.72737	1.12139	-5.73956	11.9474	22.4924
0.490475	0	-0.679306	0	5.61056	-1.25797	0	-66.7858	35.8774	166.254		-1.33831	-6.43693	-7.0187	-1.07631	-1.72849	1.12139	-5.799	11.9793	22.6404
0.491365	0	-0.918321	0	5.22059	-1.25797	0	-65.1379	38.4688	142.088		-1.33831	-6.43775	-7.0187	-1.07167	-1.72961	1.12139	-5.85697	12.0136	22.7668
0.492256	0	-1.15734	0	4.7174	-1.25797	0	-63.4145	41.0854	117.054		-1.33831	-6.43878	-7.0187	-1.06747	-1.73073	1.12139	-5.91341	12.0501	22.871
0.493146	0	-1.45925	0	4.08842	-1.50957	0	-61.5778	43.6265	98.6503		-1.33831	-6.44008	-7.0187	-1.06383	-1.73207	1.12139	-5.96821	12.0889	22.9588
0.494036	0	-1.78632	0	3.58523	-1.76116	0	-59.2883	46.4444	84.0704		-1.33831	-6.44167	-7.0187	-1.06064	-1.73364	1.12139	-6.02098	12.1303	23.0336
0.494926	0	-2.12598	0	3.09462	-2.01276	0	-57.502	49.0358	71.3145		-1.33831	-6.44356	-7.0187	-1.05788	-1.73543	1.12139	-6.07216	12.1739	23.0971
0.495816	0	-2.49079	0	2.10082	-2.26435	0	-55.7408	51.8034	59.1122		-1.33831	-6.44578	-7.0187	-1.05601	-1.73745	1.12139	-6.12177	12.22	23.1497
0.496706	0	-2.86818	0	1.38377	-2.51595	0	-54.2438	54.8728	48.5326		-1.33831	-6.44833	-7.0187	-1.05478	-1.73969	1.12139	-6.17004	12.2689	23.1929
0.497597	0	-2.94366	0	0.905741	-2.51595	0	-52.8097	57.9045	39.9784		-1.33831	-6.45095	-7.0187	-1.05398	-1.74192	1.12139	-6.21704	12.3204	23.2285
0.498487	0	-2.99398	0	0.339653	-2.51595	0	-51.6524	60.823	32.9967		-1.33831	-6.45361	-7.0187	-1.05367	-1.74416	1.12139	-6.26301	12.3745	23.2578
0.499377	0	-3.00656	0	-0.868002	-2.51595	0	-50.3944	63.8673	27.3232		-1.33831	-6.45629	-7.0187	-1.05445	-1.7464	1.12139	-6.30786	12.4314	23.2822
0.500267	0	-2.6669	0	-2.30209	-2.51595	0	-49.1994	66.9997	23.0335		-1.33831	-6.45866	-7.0187	-1.0565	-1.74864	1.12139	-6.35165	12.491	23.3027
0.501157	0	-2.30209	0	-4.22679	-2.51595	0	-47.9414	70.2201	19.6747		-1.33831	-6.46071	-7.0187	-1.06026	-1.75088	1.12139	-6.39432	12.5535	23.3202
0.502047	0	-1.94986	0	-6.52888	-2.51595	0	-47.0231	73.8053	17.2594		-1.33831	-6.46245	-7.0187	-1.06607	-1.75312	1.12139	-6.43617	12.6192	23.3355
0.502938	0	-1.59763	0	-9.54802	-2.50337	-0.251595	-45.9664	78.4598	15.7121		-1.33831	-6.46387	-7.0187	-1.07457	-1.75535	1.12116	-6.47708	12.689	23.3495
0.503828	0	-1.27055	0	-13.1207	-2.49079	-0.50319	-44.7965	82.7747	14.7057		-1.33831	-6.465	-7.0187	-1.08624	-1.75757	1.12072	-6.51695	12.7627	23.3626
0.504718	0	-1.25797	0	-17.6745	-2.47821	-0.50319	-43.7775	90.637	14.127		-1.33831	-6.46612	-7.0187	-1.10197	-1.75977	1.12027	-6.55591	12.8434	23.3752
0.505608	0	-1.25797	0	-24.4928	-2.46563	-0.50319	-42.7963	100.864	14.3283		-1.33831	-6.46724	-7.0187	-1.12377	-1.76197	1.11982	-6.594	12.9331	23.3879
0.506498	0	-1.25797	0	-33.0847	-2.46563	-0.50319	-41.576	110.853	14.8441		-1.33831	-6.46836	-7.0187	-1.15322	-1.76416	1.11937	-6.631	13.0318	23.4011
0.507388	0	-1.25797	0	-42.0541	-2.47821	-0.251595	-40.3558	119.256	15.5486		-1.33831	-6.46948	-7.0187	-1.19065	-1.76637	1.11915	-6.66692	13.1379	23.415
0.508278	0	-1.25797	0	-50.5454	-2.25177	0	-39.123	127.949	16.2153		-1.33831	-6.4706	-7.0187	-1.23563	-1.76837	1.11915	-6.70174	13.2518	23.4294
0.509169	0	-1.25797	0	-58.9738	-2.03792	0	-38.1544	131.71	16.9072		-1.33831	-6.47172	-7.0187	-1.28812	-1.77018	1.11915	-6.7357	13.369	23.4444
0.510059	0	-1.25797	0	-65.6537	-1.81148	0	-37.3367	133.609	17.0833		-1.33831	-6.47284	-7.0187	-1.34655	-1.7718	1.11915	-6.76893	13.4879	23.4597
0.510949	0	-1.25797	0	-71.5913	-1.58505	-0.251595	-36.5945	137.811	16.643		-1.33831	-6.47396	-7.0187	-1.41027	-1.77321	1.11893	-6.80149	13.6106	23.4745
0.511839	0	-1.25797	0	-75.8684	-1.35861	-0.50319	-36.041	143.283	15.6869		-1.33831	-6.47508	-7.0187	-1.47779	-1.77442	1.11848	-6.83357	13.7381	23.4884
0.512729	0	-1.25797	0	-81.7557	-1.37119	-0.754784	-35.5126	150.818	14.5925		-1.33831	-6.4762	-7.0187	-1.55055	-1.77564	1.11781	-6.86518	13.8723	23.5014
0.513619	0	-1.25797	0	-85.0768	-1.34603	-1.00638	-35.0723	163.348	13.4477		-1.33831	-6.47732	-7.0187	-1.62627	-1.77683	1.11691	-6.89639	14.0177	23.5134
0.51451	0	-1.00638	0	-87.6808	-1.33345	-1.25797	-34.6069	175.601	12.064		-1.33831	-6.47821	-7.0187	-1.70431	-1.77802	1.11579	-6.92719	14.174	23.5241
0.5154	0	-0.754784	0	-88.9639	-1.30829	-1.00638	-33.8647	189.552	11.5985		-1.33831	-6.47888	-7.0187	-1.78348	-1.77918	1.11489	-6.95733	14.3427	23.5344
0.51629	0	-0.50319	0	-93.7316	-1.28313	-0.754784	-33.1979	203.817	11.3092		-1.33831	-6.47933	-7.0187	-1.86691	-1.78033	1.11422	-6.98688	14.5241	23.5445
0.51718	0	-0.251595	0	-98.5119	-1.25797	-0.515769	-32.3677	217.063	10.7305		-1.33831	-6.47955	-7.0187	-1.95458	-1.78145	1.11376	-7.01568	14.7173	23.5541
0.51807	0	0	0	-102.437	-1.25797	-0.264175	-31.1726	225.391	9.67382		-1.33831	-6.47955	-7.0187	-2.04575	-1.78257	1.11353	-7.04343	14.9179	23.5627
0.51896	0	0	0	-104.877	-1.25797	-0.01258	-29.7259	233.417	8.54164		-1.33831	-6.47955	-7.0187	-2.13909	-1.78369	1.11352	-7.06988	15.1256	23.5703
0.51985	0	0	0	-102.814	-1.00638	-0.01258	-28.6566	245.041	6.40309		-1.33831	-6.47955	-7.0187	-2.2306	-1.78458	1.11351	-7.09539	15.3437	23.576
0.520741	0	0	0	-100.462	-0.754784	-0.01258	-27.4742	246.349	4.25195		-1.33831	-6.47955	-7.0187	-2.32001	-1.78525	1.1135	-7.11984	15.563	23.5798
0.521631	0	0	0	-95.4299	-0.50319	0	-26.3168	238.399	2.39015		-1.33831	-6.47955	-7.0187	-2.40494	-1.7857	1.1135	-7.14326	15.7751	23.5819
0.522521	0	0	-0.251595	-95.1909	-0.251595	0	-25.4991	223.102	1.03154		-1.33831	-6.47955	-7.01892	-2.48966	-1.78592	1.1135	-7.16596	15.9737	23.5828
0.523411	0	0	-0.251595	-93.3039	0	0	-25.0085	203.804	0.289334		-1.33831	-6.47955	-7.01914	-2.5727	-1.78592	1.1135	-7.18821	16.1551	23.5831
0.524301	0	0	-0.50319	-94.2726	0	0	-24.5557	173.89	0.088058		-1.33831	-6.47955	-7.01959	-2.6566	-1.78592	1.1135	-7.21007	16.3098	23.5831
0.525191	0	0	-0.754784	-92.0208	0	0	-24.2286	148.693	0		-1.33831	-6.47955	-7.02026	-2.7385	-1.78592	1.1135	-7.23163	16.4422	23.5831
0.526082	0	0	-1.00638	-89.052	0	0	-24.2034	125.697	0		-1.33831	-6.47955	-7.02116	-2.81776	-1.78592	1.1135	-7.25317	16.554	23.5831
0.526972	0	0	-1.00638	-84.2214	0	0	-24.1279	107.217	0		-1.33831	-6.47955	-7.02206	-2.89271	-1.78592	1.1135	-7.27465	16.6495	23.5831
0.527862	0	0	-1.25797	-82.5105	0	0	-24.0147	89.7061	0		-1.33831	-6.47955	-7.02317	-2.96615	-1.78592	1.1135	-7.29602	16.7293	23.5831
0.528752	0	0	-1.25797	-84.6491	0	0	-23.9896	72.9122	0		-1.33831	-6.47955	-7.02429	-3.04149	-1.78592	1.1135	-7.31737	16.7942	23.5831
0.529642	0	0	-1.25797	-87.0518	0	0	-23.9896	58.3448	0		-1.33831	-6.47955	-7.02541	-3.11896	-1.78592	1.1135	-7.33872	16.8461	23.5831
0.530532	0	0	-1.25797	-92.5995	0	0	-23.8134	47.4005	0		-1.33831	-6.47955	-7.02653	-3.20138	-1.78592	1.1135	-7.35992	16.8883	23.5831
0.531422	0	0	-1.25797	-94.7129	0	0	-23.6877	38.7959	0		-1.33831	-6.47955	-7.02765	-3.28567	-1.78592	1.1135	-7.381	16.9228	23.5831
0.532313	0	0	-1.25797	-97.4301	0	0	-23.499	31.3236	0		-1.33831	-6.47955	-7.02877	-3.37238	-1.78592	1.1135	-7.40191	16.9507	23.5831
0.533203	0	0	-1.25797	-98.1849	0	0	-23.2725	26.0904	0		-1.33831	-6.47955	-7.02989	-3.45977	-1.78592	1.1135	-7.42262	16.9739	23.5831
0.534093	0	0	-1.25797	-100.65	0	0	-22.8951	22.2158	0		-1.33831	-6.47955	-7.03101	-3.54935	-1.78592	1.1135	-7.443	16.9937	23.5831
0.534983	0	0	-1.25797	-101.858	-0.251595	0	-22.631	19.7879	0		-1.33831	-6.47955	-7.03213	-3.64	-1.78615	1.1135	-7.46314	17.0113	23.5831
0.535873	0	0	-1.25797	-103.544	-0.50319	0	-22.1655	18.2658	0		-1.33831	-6.47955	-7.03325	-3.73215	-1.7866	1.1135	-7.48287	17.0276	23.5831
0.536763	0	0	-1.25797	-104.915	-0.754784	0	-21.3856	18.2658	0		-1.33831	-6.47955	-7.03437	-3.82553	-1.78727	1.1135	-7.5019	17.0438	23.5831
0.537654	0	0	-1.25797	-107.016	-1.00638	0	-20.3666	18.14	0		-1.33831	-6.47955	-7.03549	-3.92077	-1.78816	1.1135	-7.52003	17.06	23.5831
0.538544	0	0	-1.25797	-107.293	-1.25797	0	-19.398	18.7061	0		-1.33831	-6.47955	-7.03661	-4.01626	-1.78928	1.1135	-7.53729	17.0766	23.5831
0.539434	0	0	-1.25797	-105.531	-1.25797	0	-18.379	19.725	0		-1.33831	-6.47955	-7.03773	-4.11019	-1.7904	1.1135	-7.55365	17.0942	23.5831
0.540324	0	0	-1.25797	-109.255	-1.25797	0	-17.3349	20.8572	0		-1.33831	-6.47955	-7.03885	-4.20742	-1.79152	1.1135	-7.56908	17.1127	23.5831
0.541214	0	0	-1.25797	-108.123	-1.25797	0	-16.643	21.6749	0		-1.33831	-6.47955	-7.03997	-4.30365	-1.79264	1.1135	-7.58389	17.132	23.5831
0.542104	0	0	-1.25797	-108.576	-1.25797	0	-15.926	22.2536	0		-1.33831	-6.47955	-7.04109	-4.40028	-1.79376	1.1135	-7.59807	17.1518	23.5831
0.542994	0	0	-1.25797	-115.268	-1.25797	0	-14.9573	22.5932	0		-1.33831	-6.47955	-7.04221	-4.50287	-1.79488	1.1135	-7.61138	17.172	23.5831
0.543885	0	0	-1.25797	-117.218	-1.25797	0	-14.2277	22.7567	-0.01258		-1.33831	-6.47955	-7.04333	-4.6072	-1.796	1.1135	-7.62404	17.1922	23.5831
0.544775	0	0	-1.25797	-112.299	-1.25797	-0.239015	-13.5861	22.5932	-0.01258		-1.33831	-6.47955	-7.04445	-4.70714	-1.79712	1.11328	-7.63613	17.2123	23.5831
0.545665	0	0	-1.25797	-109.72	-1.25797	-0.49061	-12.9697	22.0271	-0.01258		-1.33831	-6.47955	-7.04557	-4.80479	-1.79824	1.11285	-7.64767	17.2319	23.5831
0.546555	0	0	-1.25797	-103.405	-1.25797	-0.742205	-12.542	21.0082	-0.01258		-1.33831	-6.47955	-7.04669	-4.89683	-1.79936	1.11219	-7.65884	17.2506	23.5831
0.547445	0	0	-1.25797	-91.6308	-1.25797	-0.993799	-12.4791	19.3476	0.025159		-1.33831	-6.47955	-7.04781	-4.97838	-1.80048	1.1113	-7.66994	17.2678	23.5831
0.548335	0	0	-1.25797	-86.8883	-1.25797	-1.24539	-12.3156	17.4104	0.767364		-1.33831	-6.47955	-7.04893	-5.05571	-1.8016	1.11019	-7.6809	17.2833	23.5838
0.549226	0	0	-1.25797	-84.1459	-1.25797	-1.25797	-12.2275	15.536	2.40273		-1.33831	-6.47955	-7.05005	-5.1306	-1.80272	1.10907	-7.69179	17.2972	23.5859
0.550116	0	0	-1.25797	-84.712	-1.25797	-1.25797	-12.2023	13.9761	4.55387		-1.33831	-6.47955	-7.05116	-5.20599	-1.80384	1.10795	-7.70265	17.3096	23.59
0.551006	0	0	-1.25797	-84.2717	-1.25797	-1.00638	-12.2149	12.8062	6.90628		-1.33831	-6.47955	-7.05228	-5.28099	-1.80496	1.10706	-7.71352	17.321	23.5961
0.551896	0	0	-1.25797	-84.0075	-1.25797	-0.754784	-12.1772	12.0891	9.25869		-1.33831	-6.47955	-7.0534	-5.35576	-1.80608	1.10639	-7.72436	17.3318	23.6044
0.552786	0	0	-1.25797	-77.8308	-1.25797	-0.515769	-12.1143	11.3092	10.8941		-1.33831	-6.47955	-7.05452	-5.42503	-1.8072	1.10593	-7.73514	17.3418	23.6141
0.553676	0	0	-1.25797	-73.2518	-1.25797	-0.289334	-12.1143	10.5921	11.674		-1.33831	-6.47955	-7.05564	-5.49022	-1.80832	1.10567	-7.74592	17.3512	23.6245
0.554566	0	0	-1.25797	-67.5532	-1.25797	-0.075478	-12.0891	9.72414	11.9256		-1.33831	-6.47955	-7.05676	-5.55035	-1.80944	1.1056	-7.75668	17.3599	23.6351
0.555457	0	0	-1.25797	-62.6471	-1.25797	-0.100638	-12.0765	8.20199	11.9885		-1.33831	-6.47955	-7.05788	-5.6061	-1.81056	1.10551	-7.76743	17.3672	23.6457
0.556347	0	0	-1.25797	-58.848	-1.25797	-0.125797	-12.0765	6.42825	11.9759		-1.33831	-6.47955	-7.059	-5.65848	-1.81168	1.1054	-7.77818	17.3729	23.6564
0.557237	0	0	-1.25797	-58.5209	-1.25797	-0.113218	-12.0765	4.81804	12.0137		-1.33831	-6.47955	-7.06012	-5.71056	-1.8128	1.1053	-7.78892	17.3772	23.6671
0.558127	0	0	-1.25797	-57.9674	-1.25797	-0.088058	-12.0765	3.17009	11.9885		-1.33831	-6.47955	-7.06124	-5.76215	-1.81391	1.10522	-7.79967	17.38	23.6778
0.559017	0	0	-1.25797	-55.4515	-1.25797	-0.050319	-12.0765	1.68569	11.8879		-1.33831	-6.47955	-7.06236	-5.8115	-1.81503	1.10518	-7.81042	17.3815	23.6883
0.559907	0	0	-1.25797	-54.7093	-1.25797	-0.025159	-12.0765	0.792524	11.7998		-1.33831	-6.47955	-7.06348	-5.86019	-1.81615	1.10515	-7.82117	17.3822	23.6988
0.560798	0	0	-1.25797	-51.4889	-1.25797	0	-12.0765	0.352233	11.7243		-1.33831	-6.47955	-7.0646	-5.90602	-1.81727	1.10515	-7.83192	17.3825	23.7093
0.561688	0	0	-1.25797	-49.3881	-1.25797	-0.251595	-12.0388	0.113218	11.5105		-1.33831	-6.47955	-7.06572	-5.94997	-1.81839	1.10493	-7.84263	17.3826	23.7195
0.562578	0	0	-1.25797	-47.086	-1.25797	-0.50319	-12.0262	0.050319	11.4224		-1.33831	-6.47955	-7.06684	-5.99188	-1.81951	1.10448	-7.85333	17.3827	23.7297
0.563468	0	0	-1.25797	-46.6834	-1.25797	-0.754784	-12.0137	0	11.3469		-1.33831	-6.47955	-7.06796	-6.03343	-1.82063	1.10381	-7.86403	17.3827	23.7398
0.564358	0	0	-1.25797	-46.4192	-1.25797	-1.00638	-12.0137	0	11.1834		-1.33831	-6.47955	-7.06908	-6.07474	-1.82175	1.10291	-7.87472	17.3827	23.7497
0.565248	0	0	-1.25797	-46.6331	-1.25797	-1.25797	-12.0137	0	10.9192		-1.33831	-6.47955	-7.0702	-6.11625	-1.82287	1.1018	-7.88541	17.3827	23.7595
0.566139	0	-0.251595	-1.25797	-47.4759	-1.00638	-1.25797	-12.0514	0	10.6173		-1.33831	-6.47978	-7.07132	-6.1585	-1.82377	1.10068	-7.89614	17.3827	23.7689
0.567029	0	-0.251595	-1.25797	-47.9414	-0.754784	-1.25797	-12.064	0	10.1015		-1.33831	-6.48	-7.07244	-6.20117	-1.82444	1.09956	-7.90687	17.3827	23.7779
0.567919	0	-0.251595	-1.25797	-48.9729	-0.50319	-1.25797	-12.064	0	9.33417		-1.33831	-6.48023	-7.07356	-6.24475	-1.82489	1.09844	-7.91761	17.3827	23.7862
0.568809	0	-0.251595	-1.25797	-48.6081	-0.251595	-1.25797	-12.0011	0	8.68002		-1.33831	-6.48045	-7.07468	-6.28801	-1.82511	1.09732	-7.92829	17.3827	23.7939
0.569699	0	-0.251595	-1.25797	-47.9917	0	-1.25797	-11.9508	0	7.97555		-1.33831	-6.48067	-7.0758	-6.33073	-1.82511	1.0962	-7.93893	17.3827	23.801
0.570589	0	0	-1.25797	-47.3501	0	-1.25797	-11.913	0	7.40947		-1.33831	-6.48067	-7.07692	-6.37287	-1.82511	1.09508	-7.94953	17.3827	23.8076
0.571479	0	-0.251595	-1.25797	-46.1551	0	-1.25797	-11.8879	0	6.8937		-1.33831	-6.4809	-7.07804	-6.41395	-1.82511	1.09396	-7.96011	17.3827	23.8138
0.57237	0	-0.251595	-1.25797	-44.18	0	-1.25797	-11.8627	0	6.51631		-1.33831	-6.48112	-7.07915	-6.45327	-1.82511	1.09284	-7.97067	17.3827	23.8196
0.57326	0	-0.251595	-1.25797	-42.7711	0	-1.25797	-11.8501	0	6.02569		-1.33831	-6.48135	-7.08027	-6.49133	-1.82511	1.09172	-7.98121	17.3827	23.8249
0.57415	0	-0.251595	-1.25797	-42.0918	0	-1.25797	-11.7495	0	5.47219		-1.33831	-6.48157	-7.08139	-6.52879	-1.82511	1.0906	-7.99167	17.3827	23.8298
0.57504	0	-0.251595	-1.25797	-40.6326	0	-1.25797	-11.6992	0	4.91868		-1.33831	-6.48179	-7.08251	-6.56496	-1.82511	1.08948	-8.00208	17.3827	23.8342
0.57593	0	0	-1.25797	-39.5507	0	-1.25797	-11.5985	0	4.28969		-1.33831	-6.48179	-7.08363	-6.60016	-1.82511	1.08836	-8.01241	17.3827	23.838
0.57682	0	0	-1.25797	-38.4437	0	-1.25797	-11.5608	0	3.68586		-1.33831	-6.48179	-7.08475	-6.63437	-1.82511	1.08724	-8.02269	17.3827	23.8413
0.577711	0	0	-1.25797	-37.1354	0	-1.24539	-11.6111	0	3.09462		-1.33831	-6.48179	-7.08587	-6.66742	-1.82511	1.08613	-8.03303	17.3827	23.844
0.578601	0	0	-1.25797	-36.6196	0	-1.23281	-11.6488	0	2.7927		-1.33831	-6.48179	-7.08699	-6.70001	-1.82511	1.08503	-8.0434	17.3827	23.8465
0.579491	0	0	-1.25797	-35.1352	0	-1.22023	-11.6992	0	2.51595		-1.33831	-6.48179	-7.08811	-6.73128	-1.82511	1.08395	-8.05381	17.3827	23.8487
0.580381	0	0	-1.25797	-33.9276	0	-1.20765	-11.8124	0	2.22661		-1.33831	-6.48179	-7.08923	-6.76148	-1.82511	1.08287	-8.06432	17.3827	23.8507
0.581271	0	0	-1.25797	-32.896	0	-1.19508	-11.6363	0	2.03792		-1.33831	-6.48179	-7.09035	-6.79076	-1.82511	1.08181	-8.07468	17.3827	23.8525
0.582161	0	0	-1.25797	-32.2419	0	-1.20765	-11.1331	0	1.72342		-1.33831	-6.48179	-7.09147	-6.81945	-1.82511	1.08074	-8.08459	17.3827	23.8541
0.583051	0	0	-1.25797	-30.5688	0	-1.22023	-11.2211	-0.037739	1.28313		-1.33831	-6.48179	-7.09259	-6.84666	-1.82511	1.07965	-8.09457	17.3827	23.8552
0.583942	0	0	-1.25797	-30.0782	0	-1.23281	-11.0324	-0.088058	0.792524		-1.33831	-6.48179	-7.09371	-6.87343	-1.82511	1.07855	-8.10439	17.3826	23.8559
0.584832	0	0	-1.25797	-29.6504	0	-0.993799	-10.6299	-0.138377	0.440291		-1.33831	-6.48179	-7.09483	-6.89982	-1.82511	1.07767	-8.11385	17.3825	23.8563
0.585722	0	0	-1.25797	-28.7824	0	-0.754784	-10.5041	-0.188696	0.188696		-1.33831	-6.48179	-7.09595	-6.92543	-1.82511	1.077	-8.1232	17.3823	23.8565
0.586612	0	0	-1.25797	-27.7761	0	-0.50319	-10.655	-0.226435	0.100638		-1.33831	-6.48179	-7.09707	-6.95015	-1.82511	1.07655	-8.13268	17.3821	23.8566
0.587502	0	0	-1.25797	-26.9584	0	-0.251595	-10.2273	-0.213856	0.062899		-1.33831	-6.48179	-7.09819	-6.97415	-1.82511	1.07632	-8.14179	17.3819	23.8566
0.588392	0	0	-1.25797	-25.9646	0	0	-9.92541	-0.364812	0.062899		-1.33831	-6.48179	-7.09931	-6.99726	-1.82511	1.07632	-8.15062	17.3816	23.8567
0.589283	0	0	-1.25797	-25.1595	0	0	-9.96315	-0.515769	0.062899		-1.33831	-6.48179	-7.10043	-7.01965	-1.82511	1.07632	-8.15949	17.3811	23.8567
0.590173	0	0	-1.25797	-24.5557	0	0	-9.7493	-0.868002	0.037739		-1.33831	-6.48179	-7.10155	-7.0415	-1.82511	1.07632	-8.16816	17.3803	23.8568
0.591063	0	0	-1.25797	-23.7254	0	0	-9.57318	-1.23281	0.01258		-1.33831	-6.48179	-7.10267	-7.06262	-1.82511	1.07632	-8.17668	17.3792	23.8568
0.591953	0	0	-1.25797	-22.6435	0	0	-9.37191	-1.81148	0.01258		-1.33831	-6.48179	-7.10379	-7.08277	-1.82511	1.07632	-8.18503	17.3776	23.8568
0.592843	0	0	-1.25797	-21.5868	0	0	-9.42222	-2.20145	0.01258		-1.33831	-6.48179	-7.10491	-7.10198	-1.82511	1.07632	-8.19341	17.3757	23.8568
0.593733	0	0	-1.25797	-20.4169	0	0	-9.09515	-2.37757	0.01258		-1.33831	-6.48179	-7.10603	-7.12015	-1.82511	1.07632	-8.20151	17.3736	23.8568
0.594623	0	0	-1.25797	-19.5238	-0.239015	0	-8.73034	-2.16371	0		-1.33831	-6.48179	-7.10714	-7.13753	-1.82532	1.07632	-8.20928	17.3716	23.8568
0.595514	0	0	-1.25797	-19.008	-0.47803	0	-8.5039	-1.96244	0		-1.33831	-6.48179	-7.10826	-7.15445	-1.82575	1.07632	-8.21684	17.3699	23.8568
0.596404	0	0	-1.25797	-18.9199	-0.717045	0	-8.51648	-1.38377	0		-1.33831	-6.48179	-7.10938	-7.17129	-1.82639	1.07632	-8.22442	17.3687	23.8568
0.597294	0	0	-1.25797	-18.7061	-0.95606	0	-8.46617	-0.817683	0		-1.33831	-6.48179	-7.1105	-7.18793	-1.82724	1.07632	-8.23196	17.3679	23.8568
0.598184	0	0	-1.25797	-18.5677	-1.20765	0	-8.42843	-0.440291	0		-1.33831	-6.48179	-7.11162	-7.20446	-1.82831	1.07632	-8.23946	17.3675	23.8568
0.599074	0	0	-1.25797	-18.3287	-1.22023	0	-8.52906	-0.276754	0		-1.33831	-6.48179	-7.11274	-7.22077	-1.8294	1.07632	-8.24705	17.3673	23.8568
0.599964	0	0	-1.25797	-17.9764	-1.23281	0	-8.47874	-0.100638	0		-1.33831	-6.48179	-7.11386	-7.23677	-1.8305	1.07632	-8.2546	17.3672	23.8568
0.600855	0	0	-1.25797	-17.1713	-1.24539	0	-8.30263	-0.075478	0		-1.33831	-6.48179	-7.11498	-7.25205	-1.8316	1.07632	-8.26199	17.3671	23.8568
0.601745	0	0	-1.25797	-16.7562	-1.25797	0	-8.02587	-0.075478	0		-1.33831	-6.48179	-7.1161	-7.26697	-1.83272	1.07632	-8.26913	17.3671	23.8568
0.602635	0	0	-1.25797	-16.3033	-1.25797	0	-7.8875	-0.088058	0		-1.33831	-6.48179	-7.11722	-7.28148	-1.83384	1.07632	-8.27615	17.367	23.8568
0.603525	0	0	-1.25797	-15.8379	-1.25797	-0.251595	-7.98813	-0.125797	0		-1.33831	-6.48179	-7.11834	-7.29557	-1.83496	1.0761	-8.28326	17.3669	23.8568
0.604415	0	-0.01258	-1.25797	-15.4731	-1.25797	-0.50319	-7.52268	-0.176116	0		-1.33831	-6.48181	-7.11946	-7.30934	-1.83608	1.07565	-8.28995	17.3667	23.8568
0.605305	0	-0.01258	-1.25797	-15.1083	-1.25797	-0.754784	-7.06981	-0.251595	0		-1.33831	-6.48182	-7.12058	-7.32279	-1.8372	1.07498	-8.29625	17.3665	23.8568
[truncated: 4,118 more rows]

## Sheet: speed-8-bwd
time in s	v in mm s-1	vmean
0	364.75	43.2
0.00089	367.542	43.2
0.00178	367.366	43.2
0.00267	364.825	43.2
0.003561	366.41	43.2
0.004451	358.623	43.2
[truncated: 4,793 more rows]

## Sheet: speed-9-bwd
time in s	v in mm s-1	vmean
[truncated: 4,799 more rows]
