# Supplementary material for: Design, characterization, and modeling of microcirculation systems with integrated oxygenators
Source: Copernicus journal article supplement (doi:10.5194/jsss-5-221-2016), 2016-06-24
Supplement: Supplementary file 4 [file Errorfunktion.xls]

## Sheet: Fitting-Error-Fkt
time in s	f(x,t)	1-erf(f(x,t))	2 Taylorglieder	3 Taylorglieder	numerical fit	y in mm	f(y,z)	1-erf(f(y,z))	aprox	Eq. (10)	Mean	x in mm	0.2
1	2.18218	0.00202823	-1.46233	-1.02805	0.00248101	0.01	0.0569803	0.935774	0.93631	0.387953	0.369018	D in mm²/s	0.0021
2	1.54303	0.0290963	-0.741127	-0.587588	0.029045	0.02	0.113961	0.871964	0.872512			pi	3.14159
3	1.25988	0.0747914	-0.421624	-0.338048	0.0745459	0.03	0.170941	0.808976	0.80932
4	1.09109	0.122823	-0.231163	-0.176879	0.122899	0.04	0.227921	0.747203	0.74732			z in mm	110
5	0.9759	0.167546	-0.101185	-0.0623428	0.167988	0.05	0.284901	0.687013	0.686982			v in mm/s	30
6	0.890871	0.207712	-0.00524006	0.0243084	0.208416	0.06	0.341882	0.628745	0.628686
7	0.824786	0.243443	0.0693285	0.0927771	0.244299	0.07	0.398862	0.572702	0.572728
8	0.771517	0.275234	0.129437	0.148629	0.276155	0.08	0.455842	0.519149	0.519343
9	0.727393	0.303626	0.179225	0.195309	0.304557	0.09	0.512823	0.468304	0.468708
10	0.690066	0.329114	0.221344	0.235077	0.330017	0.1	0.569803	0.420345	0.420957
11	0.657952	0.35212	0.257581	0.269484	0.352974	0.11	0.626783	0.375399	0.376183
12	0.629941	0.372998	0.289188	0.299635	0.373791	0.12	0.683763	0.33355	0.334445
13	0.605228	0.392041	0.317074	0.326339	0.392767	0.13	0.740744	0.294837	0.29577
14	0.583212	0.409493	0.341916	0.350206	0.41015	0.14	0.797724	0.259256	0.260152
15	0.563436	0.425556	0.36423	0.371706	0.426146	0.15	0.854704	0.226765	0.22756
16	0.545545	0.440401	0.384419	0.391204	0.440927	0.16	0.911685	0.197288	0.197933
17	0.529256	0.45417	0.402798	0.408994	0.454636	0.17	0.968665	0.170718	0.171184
18	0.514344	0.466985	0.419624	0.425311	0.467395	0.18	1.02565	0.146924	0.147202
19	0.500626	0.47895	0.435104	0.440347	0.479308	0.19	1.08263	0.125754	0.125854
20	0.48795	0.490153	0.449407	0.454263	0.490463	0.2	1.13961	0.107039	0.106988
21	0.47619	0.500671	0.462677	0.467189	0.500937	0.21	1.19659	0.0906025	0.0904357
22	0.465242	0.510569	0.475031	0.479239	0.510796	0.22	1.25357	0.0762601	0.07602
23	0.455016	0.519907	0.48657	0.490507	0.520098	0.23	1.31055	0.0638261	0.0635558
24	0.445435	0.528733	0.49738	0.501074	0.528892	0.24	1.36753	0.0531162	0.0528559
25	0.436436	0.537094	0.507535	0.511009	0.537224	0.25	1.42451	0.043951	0.0437347
26	0.42796	0.545028	0.517098	0.520374	0.545132
27	0.419961	0.55257	0.526125	0.529221	0.55265
28	0.412393	0.559751	0.534664	0.537595	0.55981
29	0.40522	0.566598	0.542758	0.545538	0.56664
30	0.39841	0.573138	0.550443	0.553086	0.573163
31	0.391931	0.579391	0.557753	0.560269	0.579402
32	0.385758	0.585379	0.564718	0.567117	0.585376
33	0.379869	0.591119	0.571364	0.573655	0.591105
34	0.374241	0.596628	0.577715	0.579905	0.596604
35	0.368856	0.601921	0.583791	0.585888	0.601889
36	0.363696	0.607011	0.589612	0.591623	0.606972
37	0.358748	0.611912	0.595196	0.597126	0.611867
38	0.353996	0.616634	0.600558	0.602412	0.616584
39	0.349428	0.621189	0.605712	0.607495	0.621135
40	0.345033	0.625585	0.610672	0.612389	0.625528
41	0.340799	0.629832	0.615449	0.617104	0.629772
42	0.336718	0.633939	0.620055	0.62165	0.633877
43	0.332779	0.637912	0.624499	0.626039	0.637849
44	0.328976	0.641758	0.628791	0.630278	0.641694
45	0.3253	0.645485	0.632938	0.634377	0.645421
46	0.321745	0.649098	0.63695	0.638342	0.649035
47	0.318304	0.652603	0.640833	0.642181	0.65254
48	0.31497	0.656005	0.644594	0.6459	0.655944
49	0.31174	0.659309	0.648239	0.649505	0.65925
50	0.308607	0.662521	0.651775	0.653003	0.662463
51	0.305566	0.665643	0.655206	0.656398	0.665587
52	0.302614	0.66868	0.658537	0.659695	0.668627
53	0.299745	0.671636	0.661774	0.662899	0.671586
54	0.296957	0.674514	0.66492	0.666014	0.674467
55	0.294245	0.677318	0.66798	0.669045	0.677274
56	0.291606	0.680051	0.670958	0.671994	0.680011
57	0.289037	0.682716	0.673857	0.674866	0.682679
58	0.286534	0.685315	0.676681	0.677664	0.685282
59	0.284095	0.687852	0.679433	0.680391	0.687822
60	0.281718	0.690328	0.682115	0.68305	0.690303
61	0.279399	0.692747	0.684732	0.685643	0.692725
62	0.277137	0.695109	0.687284	0.688174	0.695092
63	0.274929	0.697418	0.689776	0.690645	0.697405
64	0.272772	0.699676	0.692209	0.693058	0.699667
65	0.270666	0.701883	0.694586	0.695415	0.701879
66	0.268608	0.704043	0.696909	0.697719	0.704043
67	0.266596	0.706156	0.699179	0.699971	0.706161
68	0.264628	0.708225	0.701399	0.702174	0.708234
69	0.262703	0.710251	0.703571	0.704329	0.710264
70	0.26082	0.712235	0.705696	0.706437	0.712253
71	0.258977	0.714179	0.707776	0.708502	0.714202
72	0.257172	0.716085	0.709812	0.710523	0.716112
73	0.255405	0.717952	0.711807	0.712503	0.717984
74	0.253673	0.719784	0.713761	0.714443	0.71982
75	0.251976	0.72158	0.715675	0.716344	0.721621
76	0.250313	0.723342	0.717552	0.718207	0.723387
77	0.248682	0.725071	0.719392	0.720035	0.725121
78	0.247083	0.726768	0.721197	0.721827	0.726823
79	0.245514	0.728434	0.722967	0.723585	0.728493
80	0.243975	0.73007	0.724704	0.725311	0.730134
81	0.242464	0.731676	0.726408	0.727004	0.731745
82	0.240981	0.733255	0.728082	0.728667	0.733328
83	0.239525	0.734806	0.729725	0.730299	0.734884
84	0.238095	0.73633	0.731338	0.731902	0.736412
85	0.236691	0.737828	0.732923	0.733477	0.737915
86	0.23531	0.739301	0.734481	0.735025	0.739392
87	0.233954	0.740749	0.736011	0.736546	0.740845
88	0.232621	0.742174	0.737515	0.738041	0.742274
89	0.231311	0.743575	0.738994	0.739511	0.74368
90	0.230022	0.744954	0.740448	0.740957	0.745063
91	0.228755	0.746311	0.741878	0.742378	0.746424
92	0.227508	0.747646	0.743285	0.743777	0.747764
93	0.226281	0.748961	0.744669	0.745153	0.749083
94	0.225075	0.750255	0.746031	0.746507	0.750381
95	0.223887	0.751529	0.747371	0.74784	0.75166
96	0.222718	0.752784	0.74869	0.749152	0.752919
97	0.221567	0.75402	0.749989	0.750443	0.754159
98	0.220433	0.755238	0.751268	0.751715	0.755382
99	0.219317	0.756438	0.752527	0.752968	0.756586
100	0.218218	0.757621	0.753767	0.754202	0.757772
101	0.217135	0.758786	0.754989	0.755417	0.758942
102	0.216068	0.759935	0.756193	0.756615	0.760095
103	0.215016	0.761068	0.75738	0.757795	0.761231
104	0.21398	0.762184	0.758549	0.758959	0.762352
105	0.212959	0.763285	0.759702	0.760105	0.763457
106	0.211952	0.764371	0.760838	0.761236	0.764547
107	0.210959	0.765443	0.761958	0.76235	0.765622
108	0.20998	0.766499	0.763063	0.76345	0.766682
109	0.209015	0.767542	0.764152	0.764534	0.767729
110	0.208063	0.768571	0.765227	0.765603	0.768761
111	0.207123	0.769586	0.766286	0.766658	0.76978
112	0.206197	0.770588	0.767332	0.767699	0.770786
113	0.205282	0.771577	0.768364	0.768725	0.771778
