# Supplementary material for: Design, characterization, and modeling of microcirculation systems with integrated oxygenators
Source: Copernicus journal article supplement (doi:10.5194/jsss-5-221-2016), 2016-06-24
Supplement: Supplementary file 5 [file Koxy-Vergleich-Modellanstze.xls]

## Sheet: Error-function-approximation
L in mm	Geom_membraneOxy1,Koxy[-], Q=0,5	Geom_membraneOxy1,Koxy[-], Q=1	Geom_membraneOxy1,Koxy[-], Q=1,5	Geom_membraneOxy1,Koxy[-], Q=2	Geom_membraneOxy1,Koxy[-], Q=2,5	Geom_membraneOxy1,Koxy[-], Q=3	Geom_membraneOxy1,Koxy[-], Q=3,5	Geom_membraneOxy1,Koxy[-], Q=4	Geom_membraneOxy1,Koxy[-], Q=4,5	Geom_membraneOxy1,Koxy[-], Q=5
1	0.146258	0.103418	0.0844402	0.0731273	0.0654071	0.0597082	0.0552791	0.0517088	0.0487516	0.0462498
2	0.206968	0.146248	0.119409	0.103411	0.0924933	0.0844345	0.0781711	0.0731224	0.0689405	0.0654027
3	0.253594	0.179161	0.146254	0.126657	0.113285	0.103415	0.0957433	0.0895596	0.0844376	0.0801046
4	0.29222	0.206978	0.168899	0.146256	0.130813	0.119415	0.110556	0.103416	0.0975015	0.092498
5	0.325246	0.23151	0.188881	0.163531	0.146257	0.133511	0.123607	0.115623	0.109011	0.103417
6	0.354096	0.2536	0.20698	0.179165	0.160224	0.146257	0.135406	0.12666	0.119416	0.113288
7	0.37968	0.273729	0.223636	0.193562	0.173079	0.157982	0.146257	0.136809	0.128984	0.122365
8	0.402609	0.292224	0.239118	0.206981	0.185056	0.168901	0.156361	0.146258	0.137891	0.130814
9	0.423315	0.309332	0.253601	0.219591	0.196318	0.179165	0.165854	0.155134	0.146258	0.138751
10	0.442127	0.325249	0.267216	0.231512	0.206981	0.188883	0.174839	0.163532	0.154173	0.146258
11	0.459303	0.34013	0.280063	0.242827	0.217128	0.198135	0.183392	0.171524	0.161703	0.1534
12	0.475054	0.354099	0.292225	0.253602	0.226821	0.206981	0.191571	0.179166	0.168902	0.160225
13	0.489556	0.367255	0.303772	0.263889	0.236107	0.21547	0.199422	0.1865	0.17581	0.166774
14	0.502955	0.379682	0.314763	0.273731	0.245023	0.223637	0.206981	0.193563	0.182461	0.173079
15	0.515378	0.391448	0.32525	0.283165	0.253602	0.231512	0.214278	0.200382	0.188883	0.179166
16	0.526933	0.40261	0.335277	0.292225	0.261868	0.239118	0.221335	0.206982	0.195099	0.185056
17	0.537711	0.413219	0.344883	0.300939	0.269845	0.246476	0.228171	0.213379	0.201126	0.190769
18	0.547792	0.423317	0.354099	0.309333	0.277552	0.253602	0.234804	0.219592	0.206982	0.196319
19	0.557247	0.432942	0.362955	0.31743	0.285006	0.260511	0.241245	0.225632	0.212678	0.201719
20	0.566136	0.442129	0.371476	0.325251	0.292226	0.267217	0.247508	0.231512	0.218227	0.206982
21	0.57451	0.450907	0.379683	0.332812	0.299223	0.273731	0.253602	0.237241	0.223637	0.212115
22	0.582418	0.459305	0.387597	0.340131	0.306013	0.280064	0.259537	0.242827	0.228918	0.217128
23	0.5899	0.467347	0.395234	0.347222	0.312607	0.286226	0.265321	0.248279	0.234077	0.222028
24	0.596992	0.475056	0.402611	0.354099	0.319016	0.292226	0.270962	0.253602	0.239119	0.226821
25	0.603727	0.482452	0.409742	0.360773	0.32525	0.298072	0.276467	0.258804	0.24405	0.231512
26	0.610133	0.489557	0.41664	0.367256	0.331319	0.303772	0.281841	0.263889	0.248876	0.236107
27	0.616236	0.496386	0.423317	0.373556	0.337231	0.309334	0.287092	0.268863	0.253602	0.240609
28	0.622059	0.502956	0.429784	0.379683	0.342994	0.314763	0.292225	0.273731	0.258232	0.245024
29	0.627623	0.509282	0.436052	0.385645	0.348614	0.320067	0.297246	0.278497	0.262769	0.249353
30	0.632946	0.515379	0.442129	0.391449	0.354099	0.32525	0.302158	0.283166	0.267217	0.253602
31	0.638045	0.521259	0.448025	0.397102	0.359454	0.330319	0.306967	0.28774	0.27158	0.257773
32	0.642936	0.526933	0.453747	0.402611	0.364685	0.335278	0.311676	0.292225	0.275861	0.261868
33	0.647631	0.532414	0.459305	0.407982	0.369797	0.340131	0.316291	0.296624	0.280064	0.265892
34	0.652145	0.537711	0.464704	0.413219	0.374795	0.344883	0.320815	0.30094	0.28419	0.269845
35	0.656488	0.542835	0.469952	0.41833	0.379683	0.349538	0.32525	0.305175	0.288243	0.273731
36	0.66067	0.547793	0.475055	0.423317	0.384465	0.354099	0.329602	0.309334	0.292225	0.277552
37	0.664702	0.552595	0.48002	0.428187	0.389145	0.358571	0.333872	0.313418	0.29614	0.28131
38	0.668592	0.557248	0.484852	0.432942	0.393728	0.362955	0.338064	0.31743	0.299988	0.285007
39	0.672349	0.561759	0.489557	0.437588	0.398215	0.367256	0.34218	0.321374	0.303772	0.288645
40	0.67598	0.566136	0.494139	0.442129	0.402611	0.371476	0.346223	0.32525	0.307495	0.292225
41	0.679491	0.570384	0.498604	0.446567	0.406918	0.375617	0.350195	0.329062	0.311158	0.295751
42	0.68289	0.57451	0.502956	0.450907	0.41114	0.379683	0.354099	0.332812	0.314763	0.299223
43	0.686182	0.57852	0.5072	0.455152	0.415279	0.383675	0.357937	0.336501	0.318313	0.302643
44	0.689373	0.582418	0.51134	0.459305	0.419337	0.387596	0.361711	0.340131	0.321808	0.306013
45	0.692468	0.58621	0.515379	0.463369	0.423317	0.391449	0.365423	0.343704	0.32525	0.309334
46	0.695471	0.5899	0.519322	0.467347	0.427222	0.395234	0.369074	0.347222	0.328642	0.312607
47	0.698388	0.593493	0.523173	0.471241	0.431053	0.398954	0.372667	0.350687	0.331984	0.315834
48	0.701221	0.596992	0.526934	0.475056	0.434814	0.402611	0.376203	0.354099	0.335278	0.319016
49	0.703976	0.600402	0.530608	0.478792	0.438505	0.406206	0.379683	0.357461	0.338525	0.322155
50	0.706655	0.603727	0.5342	0.482453	0.442129	0.409742	0.383109	0.360774	0.341726	0.32525
51	0.709263	0.606969	0.537711	0.48604	0.445688	0.413219	0.386483	0.364038	0.344883	0.328305
52	0.711801	0.610133	0.541146	0.489557	0.449183	0.41664	0.389806	0.367256	0.347997	0.331319
53	0.714274	0.613221	0.544505	0.493005	0.452616	0.420006	0.393079	0.370428	0.351069	0.334295
54	0.716684	0.616236	0.547793	0.496386	0.45599	0.423317	0.396303	0.373556	0.354099	0.337231
55	0.719034	0.619181	0.551011	0.499702	0.459305	0.426576	0.39948	0.376641	0.35709	0.340131
56	0.721326	0.622059	0.554162	0.502956	0.462563	0.429784	0.402611	0.379683	0.360042	0.342994
57	0.723562	0.624873	0.557248	0.506149	0.465766	0.432942	0.405697	0.382684	0.362955	0.345822
58	0.725746	0.627623	0.560271	0.509283	0.468914	0.436052	0.408738	0.385645	0.365831	0.348615
59	0.727878	0.630314	0.563233	0.512359	0.472011	0.439114	0.411736	0.388566	0.368671	0.351374
60	0.729961	0.632946	0.566136	0.515379	0.475056	0.442129	0.414692	0.391449	0.371476	0.354099
61	0.731996	0.635523	0.568982	0.518345	0.478051	0.445099	0.417607	0.394294	0.374245	0.356793
62	0.733987	0.638045	0.571773	0.521259	0.480997	0.448025	0.420482	0.397102	0.376981	0.359454
63	0.735933	0.640516	0.57451	0.524121	0.483896	0.450907	0.423317	0.399874	0.379683	0.362085
64	0.737837	0.642936	0.577196	0.526934	0.486749	0.453747	0.426114	0.402611	0.382353	0.364685
65	0.739701	0.645307	0.579831	0.529698	0.489557	0.456546	0.428873	0.405313	0.38499	0.367256
66	0.741525	0.647631	0.582418	0.532414	0.492321	0.459305	0.431595	0.407982	0.387597	0.369797
67	0.743311	0.64991	0.584958	0.535085	0.495041	0.462024	0.434281	0.410617	0.390172	0.37231
68	0.745061	0.652145	0.587451	0.537712	0.49772	0.464704	0.436931	0.413219	0.392718	0.374795
69	0.746775	0.654337	0.5899	0.540294	0.500358	0.467347	0.439547	0.41579	0.395234	0.377252
70	0.748455	0.656488	0.592306	0.542835	0.502956	0.469952	0.442129	0.41833	0.397721	0.379683
71	0.750102	0.658598	0.594669	0.545334	0.505515	0.472522	0.444677	0.420839	0.40018	0.382087
72	0.751718	0.66067	0.596992	0.547793	0.508036	0.475056	0.447193	0.423317	0.402611	0.384465
73	0.753302	0.662704	0.599275	0.550213	0.51052	0.477555	0.449677	0.425766	0.405015	0.386818
74	0.754856	0.664702	0.60152	0.552595	0.512967	0.48002	0.45213	0.428187	0.407392	0.389146
75	0.756381	0.666665	0.603727	0.554939	0.515379	0.482453	0.454551	0.430579	0.409742	0.391449
76	0.757878	0.668593	0.605898	0.557248	0.517757	0.484852	0.456943	0.432942	0.412067	0.393728
77	0.759348	0.670487	0.608033	0.559521	0.5201	0.48722	0.459305	0.435279	0.414366	0.395983
78	0.760792	0.672349	0.610133	0.561759	0.52241	0.489557	0.461638	0.437589	0.41664	0.398215
79	0.762209	0.67418	0.6122	0.563964	0.524688	0.491863	0.463942	0.439872	0.41889	0.400424
80	0.763602	0.67598	0.614234	0.566136	0.526934	0.494139	0.466219	0.442129	0.421115	0.402611
81	0.764971	0.67775	0.616236	0.568276	0.529149	0.496386	0.468468	0.444361	0.423317	0.404776
82	0.766316	0.679492	0.618207	0.570384	0.531333	0.498604	0.47069	0.446567	0.425496	0.406918
83	0.767639	0.681205	0.620148	0.572462	0.533488	0.500794	0.472886	0.448749	0.427651	0.40904
84	0.768939	0.68289	0.622059	0.57451	0.535614	0.502956	0.475056	0.450907	0.429784	0.41114
85	0.770217	0.684549	0.623942	0.576529	0.537712	0.505091	0.4772	0.453041	0.431895	0.413219
86	0.771475	0.686183	0.625796	0.57852	0.539781	0.5072	0.479319	0.455152	0.433984	0.415279
87	0.772713	0.68779	0.627623	0.580483	0.541824	0.509283	0.481414	0.45724	0.436052	0.417318
88	0.77393	0.689373	0.629423	0.582418	0.543839	0.51134	0.483485	0.459305	0.438098	0.419337
89	0.775128	0.690932	0.631198	0.584327	0.545829	0.513372	0.485532	0.461348	0.440124	0.421337
90	0.776308	0.692468	0.632946	0.58621	0.547793	0.515379	0.487556	0.463369	0.442129	0.423317
91	0.777469	0.693981	0.63467	0.588067	0.549732	0.517363	0.489557	0.465368	0.444114	0.425279
92	0.778612	0.695471	0.63637	0.5899	0.551647	0.519322	0.491535	0.467347	0.446079	0.427222
93	0.779738	0.69694	0.638045	0.591708	0.553537	0.521259	0.493492	0.469304	0.448025	0.429147
94	0.780847	0.698388	0.639698	0.593493	0.555404	0.523173	0.495427	0.471241	0.449951	0.431054
95	0.781939	0.699815	0.641328	0.595254	0.557248	0.525064	0.49734	0.473158	0.451859	0.432942
96	0.783015	0.701221	0.642936	0.596992	0.559069	0.526934	0.499233	0.475056	0.453747	0.434814
97	0.784076	0.702608	0.644522	0.598708	0.560868	0.528782	0.501105	0.476933	0.455618	0.436668
98	0.785121	0.703976	0.646087	0.600402	0.562645	0.530608	0.502956	0.478792	0.45747	0.438505
99	0.786151	0.705325	0.647632	0.602075	0.564401	0.532414	0.504788	0.480632	0.459305	0.440325
100	0.787167	0.706655	0.649156	0.603727	0.566136	0.5342	0.5066	0.482453	0.461122	0.442129
101	0.788168	0.707968	0.65066	0.605358	0.56785	0.535966	0.508393	0.484255	0.462921	0.443916
102	0.789155	0.709263	0.652145	0.606969	0.569545	0.537712	0.510167	0.48604	0.464704	0.445688
103	0.790129	0.71054	0.653611	0.608561	0.571219	0.539438	0.511923	0.487807	0.46647	0.447443
104	0.791089	0.711801	0.655058	0.610133	0.572874	0.541146	0.51366	0.489557	0.468219	0.449183
105	0.792037	0.713046	0.656488	0.611686	0.57451	0.542835	0.515379	0.491289	0.469952	0.450907
106	0.792972	0.714274	0.657899	0.613221	0.576128	0.544505	0.517081	0.493005	0.471669	0.452616
107	0.793894	0.715487	0.659293	0.614738	0.577727	0.546158	0.518765	0.494704	0.47337	0.45431
108	0.794804	0.716684	0.66067	0.616236	0.579308	0.547793	0.520432	0.496386	0.475056	0.45599
109	0.795702	0.717866	0.662031	0.617718	0.580872	0.549411	0.522082	0.498052	0.476726	0.457654
110	0.796589	0.719034	0.663374	0.619182	0.582418	0.551011	0.523715	0.499703	0.478381	0.459305
111	0.797464	0.720187	0.664702	0.620629	0.583947	0.552595	0.525333	0.501337	0.48002	0.460941
112	0.798328	0.721326	0.666014	0.622059	0.58546	0.554162	0.526934	0.502956	0.481646	0.462563
113	0.799181	0.722451	0.667311	0.623474	0.586956	0.555713	0.528519	0.50456	0.483256	0.464171
114	0.800024	0.723562	0.668593	0.624873	0.588436	0.557248	0.530089	0.506149	0.484852	0.465766
115	0.800856	0.724661	0.669859	0.626256	0.5899	0.558767	0.531643	0.507723	0.486434	0.467347
116	0.801677	0.725746	0.671111	0.627623	0.591348	0.560271	0.533182	0.509283	0.488003	0.468914
117	0.802489	0.726818	0.672349	0.628976	0.592782	0.561759	0.534706	0.510828	0.489557	0.470469
118	0.803291	0.727878	0.673573	0.630314	0.5942	0.563233	0.536216	0.512359	0.491098	0.472011
119	0.804083	0.728925	0.674783	0.631637	0.595603	0.564691	0.537712	0.513876	0.492625	0.473539
120	0.804866	0.729961	0.67598	0.632946	0.596992	0.566136	0.539193	0.515379	0.494139	0.475056
121	0.80564	0.730984	0.677163	0.634241	0.598367	0.567566	0.54066	0.516869	0.49564	0.476559
122	0.806404	0.731997	0.678334	0.635523	0.599727	0.568982	0.542113	0.518346	0.497129	0.478051
123	0.80716	0.732997	0.679492	0.636791	0.601074	0.570384	0.543553	0.519809	0.498604	0.47953
124	0.807907	0.733987	0.680637	0.638045	0.602407	0.571773	0.544979	0.521259	0.500067	0.480997
125	0.808645	0.734965	0.68177	0.639287	0.603727	0.573148	0.546393	0.522696	0.501518	0.482453
126	0.809375	0.735933	0.68289	0.640516	0.605034	0.57451	0.547793	0.524121	0.502956	0.483896
127	0.810097	0.73689	0.683999	0.641732	0.606327	0.57586	0.549181	0.525534	0.504383	0.485328
128	0.810811	0.737837	0.685097	0.642936	0.607608	0.577196	0.550556	0.526934	0.505797	0.486749
129	0.811516	0.738774	0.686183	0.644128	0.608877	0.57852	0.551918	0.528322	0.5072	0.488159
130	0.812214	0.739701	0.687257	0.645307	0.610133	0.579832	0.553268	0.529698	0.508591	0.489557
131	0.812904	0.740618	0.688321	0.646475	0.611377	0.581131	0.554607	0.531062	0.509971	0.490944
132	0.813587	0.741525	0.689373	0.647632	0.612609	0.582418	0.555933	0.532414	0.51134	0.492321
133	0.814263	0.742423	0.690415	0.648777	0.61383	0.583694	0.557248	0.533755	0.512697	0.493686
134	0.814931	0.743311	0.691447	0.64991	0.615039	0.584958	0.558551	0.535085	0.514044	0.495041
135	0.815592	0.74419	0.692468	0.651033	0.616236	0.58621	0.559842	0.536404	0.515379	0.496386
136	0.816246	0.745061	0.693479	0.652145	0.617423	0.587451	0.561123	0.537712	0.516704	0.49772
137	0.816893	0.745922	0.69448	0.653246	0.618598	0.588681	0.562392	0.539008	0.518019	0.499044
138	0.817534	0.746775	0.695471	0.654337	0.619762	0.5899	0.563651	0.540294	0.519322	0.500358
139	0.818167	0.747619	0.696453	0.655417	0.620916	0.591108	0.564899	0.54157	0.520616	0.501662
140	0.818795	0.748455	0.697425	0.656488	0.622059	0.592306	0.566136	0.542835	0.521899	0.502956
141	0.819416	0.749283	0.698388	0.657548	0.623192	0.593493	0.567362	0.54409	0.523173	0.504241
142	0.82003	0.750102	0.699341	0.658598	0.624315	0.594669	0.568579	0.545334	0.524436	0.505515
143	0.820639	0.750914	0.700286	0.659639	0.625428	0.595836	0.569785	0.546569	0.52569	0.50678
144	0.821241	0.751718	0.701221	0.66067	0.62653	0.596992	0.570981	0.547793	0.526934	0.508036
145	0.821837	0.752513	0.702148	0.661692	0.627623	0.598139	0.572167	0.549008	0.528168	0.509283
146	0.822428	0.753302	0.703066	0.662705	0.628707	0.599275	0.573344	0.550213	0.529393	0.51052
147	0.823013	0.754083	0.703976	0.663708	0.62978	0.600402	0.57451	0.551409	0.530608	0.511748
148	0.823592	0.754856	0.704877	0.664702	0.630845	0.60152	0.575668	0.552595	0.531815	0.512967
149	0.824165	0.755622	0.70577	0.665688	0.6319	0.602628	0.576816	0.553772	0.533012	0.514178
150	0.824733	0.756381	0.706655	0.666665	0.632946	0.603727	0.577954	0.554939	0.5342	0.515379
151	0.825296	0.757133	0.707532	0.667633	0.633984	0.604817	0.579084	0.556098	0.535379	0.516572
152	0.825853	0.757878	0.708401	0.668593	0.635012	0.605898	0.580204	0.557248	0.53655	0.517757
153	0.826405	0.758617	0.709263	0.669544	0.636032	0.60697	0.581315	0.558389	0.537712	0.518932
154	0.826951	0.759348	0.710116	0.670487	0.637043	0.608033	0.582418	0.559521	0.538865	0.5201
155	0.827493	0.760073	0.710963	0.671422	0.638045	0.609087	0.583512	0.560644	0.540009	0.521259
156	0.82803	0.760792	0.711801	0.672349	0.63904	0.610133	0.584598	0.561759	0.541146	0.52241
157	0.828561	0.761504	0.712633	0.673269	0.640026	0.611171	0.585675	0.562866	0.542274	0.523553
158	0.829088	0.762209	0.713457	0.67418	0.641004	0.6122	0.586743	0.563964	0.543394	0.524688
159	0.82961	0.762909	0.714274	0.675084	0.641974	0.613221	0.587804	0.565054	0.544505	0.525815
160	0.830128	0.763602	0.715084	0.67598	0.642936	0.614234	0.588856	0.566136	0.545609	0.526934
161	0.83064	0.76429	0.715888	0.676869	0.64389	0.615239	0.5899	0.56721	0.546705	0.528045
162	0.831148	0.764971	0.716684	0.67775	0.644837	0.616236	0.590936	0.568276	0.547793	0.529149
163	0.831652	0.765646	0.717474	0.678624	0.645776	0.617226	0.591965	0.569334	0.548873	0.530245
164	0.832151	0.766316	0.718257	0.679492	0.646707	0.618207	0.592985	0.570384	0.549946	0.531333
165	0.832646	0.76698	0.719034	0.680352	0.647632	0.619182	0.593998	0.571427	0.551011	0.532414
166	0.833136	0.767639	0.719804	0.681205	0.648548	0.620148	0.595004	0.572462	0.552069	0.533488
167	0.833623	0.768291	0.720568	0.682051	0.649458	0.621107	0.596002	0.57349	0.553119	0.534555
168	0.834105	0.768939	0.721326	0.68289	0.650361	0.622059	0.596992	0.57451	0.554162	0.535614
169	0.834582	0.769581	0.722077	0.683723	0.651256	0.623004	0.597975	0.575524	0.555198	0.536666
170	0.835056	0.770217	0.722823	0.684549	0.652145	0.623942	0.598952	0.576529	0.556226	0.537712
171	0.835526	0.770849	0.723562	0.685369	0.653027	0.624873	0.599921	0.577528	0.557248	0.53875
172	0.835992	0.771475	0.724296	0.686183	0.653902	0.625796	0.600882	0.57852	0.558262	0.539781
173	0.836454	0.772096	0.725024	0.68699	0.65477	0.626713	0.601838	0.579505	0.55927	0.540806
174	0.836912	0.772713	0.725746	0.68779	0.655632	0.627623	0.602786	0.580483	0.560271	0.541824
175	0.837366	0.773324	0.726462	0.688585	0.656488	0.628527	0.603727	0.581454	0.561265	0.542835
176	0.837817	0.77393	0.727173	0.689373	0.657337	0.629423	0.604662	0.582418	0.562252	0.543839
177	0.838264	0.774532	0.727878	0.690156	0.658179	0.630314	0.60559	0.583376	0.563233	0.544837
178	0.838707	0.775128	0.728578	0.690932	0.659016	0.631198	0.606511	0.584327	0.564207	0.545829
179	0.839147	0.77572	0.729272	0.691703	0.659846	0.632075	0.607426	0.585272	0.565175	0.546814
180	0.839583	0.776308	0.729961	0.692468	0.66067	0.632946	0.608335	0.58621	0.566136	0.547793
181	0.840016	0.77689	0.730645	0.693227	0.661488	0.633811	0.609237	0.587142	0.567091	0.548766
182	0.840445	0.777469	0.731323	0.693981	0.662301	0.63467	0.610133	0.588067	0.568039	0.549732
183	0.84087	0.778042	0.731997	0.694729	0.663107	0.635523	0.611023	0.588987	0.568982	0.550692
184	0.841293	0.778612	0.732665	0.695471	0.663907	0.63637	0.611907	0.5899	0.569918	0.551647
185	0.841712	0.779177	0.733328	0.696208	0.664702	0.63721	0.612785	0.590807	0.570849	0.552595
186	0.842128	0.779738	0.733987	0.69694	0.665491	0.638045	0.613656	0.591708	0.571773	0.553537
187	0.84254	0.780294	0.73464	0.697667	0.666275	0.638875	0.614522	0.592603	0.572691	0.554473
188	0.84295	0.780847	0.735289	0.698388	0.667053	0.639698	0.615382	0.593493	0.573604	0.555404
189	0.843356	0.781395	0.735933	0.699104	0.667825	0.640516	0.616236	0.594376	0.57451	0.556329
190	0.843759	0.781939	0.736572	0.699815	0.668593	0.641328	0.617085	0.595254	0.575411	0.557248
191	0.844159	0.782479	0.737207	0.70052	0.669354	0.642135	0.617928	0.596126	0.576307	0.558161
192	0.844556	0.783015	0.737837	0.701221	0.670111	0.642936	0.618765	0.596992	0.577196	0.559069
193	0.84495	0.783547	0.738463	0.701917	0.670862	0.643732	0.619597	0.597853	0.57808	0.559971
194	0.845342	0.784076	0.739084	0.702608	0.671608	0.644522	0.620423	0.598708	0.578959	0.560868
195	0.84573	0.7846	0.739701	0.703294	0.672349	0.645307	0.621244	0.599558	0.579832	0.561759
196	0.846115	0.785121	0.740313	0.703976	0.673085	0.646087	0.622059	0.600402	0.580699	0.562645
197	0.846498	0.785638	0.740921	0.704653	0.673816	0.646862	0.62287	0.601241	0.581561	0.563526
198	0.846877	0.786151	0.741525	0.705325	0.674542	0.647632	0.623675	0.602075	0.582418	0.564401
199	0.847254	0.786661	0.742124	0.705992	0.675264	0.648396	0.624475	0.602904	0.58327	0.565271
200	0.847628	0.787167	0.74272	0.706655	0.67598	0.649156	0.625269	0.603727	0.584116	0.566136
201	0.848	0.787669	0.743311	0.707314	0.676692	0.64991	0.626059	0.604545	0.584958	0.566996
202	0.848368	0.788168	0.743898	0.707968	0.677399	0.65066	0.626844	0.605358	0.585794	0.56785
203	0.848735	0.788663	0.744482	0.708617	0.678101	0.651405	0.627623	0.606166	0.586625	0.5687
204	0.849098	0.789155	0.745061	0.709263	0.678798	0.652145	0.628398	0.60697	0.587451	0.569545
205	0.849459	0.789644	0.745636	0.709904	0.679492	0.65288	0.629168	0.607768	0.588272	0.570384
206	0.849817	0.790129	0.746208	0.71054	0.68018	0.653611	0.629933	0.608561	0.589089	0.571219
207	0.850173	0.790611	0.746775	0.711173	0.680864	0.654337	0.630693	0.609349	0.5899	0.572049
208	0.850526	0.791089	0.747339	0.711801	0.681544	0.655058	0.631449	0.610133	0.590707	0.572874
209	0.850877	0.791565	0.747899	0.712426	0.682219	0.655775	0.6322	0.610912	0.591508	0.573695
210	0.851226	0.792037	0.748455	0.713046	0.68289	0.656488	0.632946	0.611686	0.592306	0.57451
211	0.851572	0.792506	0.749008	0.713662	0.683557	0.657196	0.633688	0.612456	0.593098	0.575322
212	0.851915	0.792972	0.749557	0.714274	0.68422	0.657899	0.634425	0.613221	0.593886	0.576128
213	0.852257	0.793434	0.750102	0.714883	0.684878	0.658598	0.635158	0.613982	0.594669	0.57693
214	0.852596	0.793894	0.750644	0.715487	0.685532	0.659293	0.635886	0.614738	0.595448	0.577727
215	0.852932	0.79435	0.751183	0.716088	0.686183	0.659984	0.63661	0.615489	0.596222	0.57852
216	0.853267	0.794804	0.751718	0.716684	0.686829	0.66067	0.63733	0.616236	0.596992	0.579308
217	0.853599	0.795255	0.752249	0.717277	0.687471	0.661352	0.638045	0.616979	0.597758	0.580092
218	0.853929	0.795702	0.752777	0.717867	0.688109	0.662031	0.638757	0.617718	0.598519	0.580872
219	0.854257	0.796147	0.753302	0.718452	0.688743	0.662705	0.639463	0.618452	0.599275	0.581647
220	0.854582	0.796589	0.753823	0.719034	0.689373	0.663374	0.640166	0.619182	0.600028	0.582418
221	0.854906	0.797028	0.754341	0.719612	0.69	0.66404	0.640865	0.619907	0.600776	0.583185
222	0.855227	0.797464	0.754856	0.720187	0.690623	0.664702	0.641559	0.620629	0.60152	0.583947
223	0.855546	0.797897	0.755368	0.720758	0.691241	0.66536	0.642249	0.621346	0.60226	0.584706
224	0.855863	0.798328	0.755876	0.721326	0.691857	0.666014	0.642936	0.622059	0.602995	0.58546
225	0.856178	0.798756	0.756381	0.72189	0.692468	0.666665	0.643618	0.622769	0.603727	0.58621
226	0.856491	0.799181	0.756883	0.722451	0.693076	0.667311	0.644297	0.623474	0.604455	0.586956
227	0.856802	0.799604	0.757382	0.723008	0.69368	0.667954	0.644971	0.624175	0.605178	0.587698
228	0.857111	0.800024	0.757878	0.723562	0.694281	0.668593	0.645642	0.624873	0.605898	0.588436
229	0.857418	0.800441	0.758371	0.724113	0.694878	0.669228	0.646309	0.625566	0.606613	0.58917
230	0.857723	0.800856	0.758861	0.724661	0.695471	0.669859	0.646972	0.626256	0.607325	0.5899
231	0.858027	0.801268	0.759348	0.725205	0.696061	0.670487	0.647632	0.626941	0.608033	0.590626
232	0.858328	0.801677	0.759832	0.725746	0.696648	0.671111	0.648287	0.627623	0.608737	0.591349
233	0.858627	0.802085	0.760313	0.726283	0.697231	0.671732	0.648939	0.628301	0.609437	0.592067
234	0.858925	0.802489	0.760792	0.726818	0.697811	0.672349	0.649587	0.628976	0.610133	0.592782
235	0.85922	0.802891	0.761267	0.72735	0.698388	0.672963	0.650232	0.629647	0.610826	0.593493
236	0.859514	0.803291	0.76174	0.727878	0.698961	0.673573	0.650873	0.630314	0.611515	0.5942
237	0.859806	0.803688	0.762209	0.728403	0.699531	0.67418	0.651511	0.630977	0.6122	0.594903
238	0.860096	0.804083	0.762676	0.728925	0.700098	0.674783	0.652145	0.631637	0.612882	0.595603
239	0.860385	0.804476	0.763141	0.729445	0.700661	0.675383	0.652776	0.632293	0.61356	0.5963
240	0.860671	0.804866	0.763602	0.729961	0.701221	0.67598	0.653403	0.632946	0.614234	0.596992
241	0.860956	0.805254	0.764061	0.730474	0.701778	0.676573	0.654026	0.633596	0.614905	0.597681
242	0.861239	0.80564	0.764517	0.730984	0.702332	0.677163	0.654647	0.634241	0.615572	0.598367
243	0.861521	0.806023	0.764971	0.731492	0.702883	0.67775	0.655264	0.634884	0.616236	0.599049
244	0.861801	0.806404	0.765422	0.731997	0.703431	0.678334	0.655877	0.635523	0.616897	0.599727
245	0.862079	0.806783	0.76587	0.732498	0.703976	0.678914	0.656488	0.636158	0.617554	0.600402
246	0.862355	0.80716	0.766316	0.732997	0.704518	0.679492	0.657095	0.636791	0.618207	0.601074
247	0.86263	0.807535	0.766759	0.733493	0.705056	0.680066	0.657699	0.63742	0.618858	0.601742
248	0.862903	0.807907	0.7672	0.733987	0.705592	0.680637	0.658299	0.638045	0.619505	0.602407
249	0.863175	0.808277	0.767639	0.734477	0.706125	0.681205	0.658897	0.638668	0.620148	0.603069
250	0.863445	0.808645	0.768074	0.734965	0.706655	0.68177	0.659491	0.639287	0.620789	0.603727
251	0.863713	0.809011	0.768508	0.735451	0.707182	0.682332	0.660082	0.639903	0.621426	0.604382
252	0.86398	0.809375	0.768939	0.735933	0.707707	0.68289	0.66067	0.640516	0.622059	0.605034
253	0.864246	0.809737	0.769367	0.736413	0.708228	0.683446	0.661255	0.641126	0.62269	0.605682
254	0.864509	0.810097	0.769794	0.73689	0.708747	0.683999	0.661837	0.641732	0.623318	0.606327
255	0.864772	0.810455	0.770217	0.737365	0.709263	0.684549	0.662416	0.642336	0.623942	0.60697
256	0.865033	0.810811	0.770639	0.737837	0.709776	0.685097	0.662992	0.642936	0.624563	0.607608
257	0.865292	0.811164	0.771058	0.738307	0.710286	0.685641	0.663565	0.643533	0.625181	0.608244
258	0.86555	0.811516	0.771475	0.738774	0.710794	0.686183	0.664135	0.644128	0.625796	0.608877
259	0.865806	0.811866	0.77189	0.739239	0.711299	0.686721	0.664702	0.644719	0.626408	0.609507
260	0.866061	0.812214	0.772302	0.739701	0.711801	0.687257	0.665267	0.645307	0.627017	0.610133
261	0.866314	0.81256	0.772713	0.74016	0.712301	0.68779	0.665828	0.645893	0.627623	0.610757
262	0.866567	0.812904	0.773121	0.740618	0.712798	0.688321	0.666386	0.646475	0.628226	0.611377
263	0.866817	0.813247	0.773526	0.741072	0.713293	0.688848	0.666942	0.647055	0.628826	0.611995
264	0.867066	0.813587	0.77393	0.741525	0.713785	0.689373	0.667495	0.647632	0.629423	0.612609
265	0.867314	0.813926	0.774332	0.741975	0.714274	0.689896	0.668045	0.648205	0.630018	0.613221
266	0.867561	0.814263	0.774731	0.742423	0.714761	0.690415	0.668593	0.648777	0.630609	0.61383
267	0.867806	0.814598	0.775128	0.742868	0.715246	0.690932	0.669137	0.649345	0.631198	0.614436
268	0.86805	0.814931	0.775523	0.743311	0.715728	0.691447	0.669679	0.64991	0.631783	0.615039
269	0.868292	0.815262	0.775917	0.743752	0.716207	0.691959	0.670219	0.650473	0.632366	0.615639
270	0.868534	0.815592	0.776308	0.74419	0.716684	0.692468	0.670755	0.651033	0.632946	0.616236
271	0.868773	0.81592	0.776697	0.744627	0.717159	0.692975	0.671289	0.65159	0.633524	0.616831
272	0.869012	0.816246	0.777084	0.745061	0.717631	0.693479	0.671821	0.652145	0.634098	0.617423
273	0.869249	0.81657	0.777469	0.745493	0.718101	0.693981	0.672349	0.652697	0.63467	0.618012
274	0.869485	0.816893	0.777852	0.745922	0.718569	0.69448	0.672876	0.653246	0.635239	0.618598
275	0.86972	0.817214	0.778233	0.74635	0.719034	0.694977	0.673399	0.653793	0.635806	0.619182
276	0.869954	0.817534	0.778612	0.746775	0.719497	0.695471	0.67392	0.654337	0.63637	0.619762
277	0.870186	0.817851	0.778989	0.747198	0.719958	0.695963	0.674439	0.654879	0.636931	0.620341
278	0.870417	0.818167	0.779364	0.747619	0.720416	0.696453	0.674955	0.655417	0.637489	0.620916
279	0.870647	0.818482	0.779738	0.748038	0.720872	0.69694	0.675469	0.655954	0.638045	0.621489
280	0.870875	0.818795	0.780109	0.748455	0.721326	0.697425	0.67598	0.656488	0.638599	0.622059
281	0.871103	0.819106	0.780479	0.74887	0.721778	0.697907	0.676489	0.657019	0.63915	0.622627
282	0.871329	0.819416	0.780847	0.749283	0.722227	0.698388	0.676995	0.657548	0.639698	0.623192
283	0.871554	0.819724	0.781213	0.749694	0.722674	0.698866	0.677499	0.658074	0.640244	0.623755
284	0.871778	0.82003	0.781577	0.750102	0.723119	0.699341	0.678001	0.658598	0.640787	0.624315
285	0.872001	0.820335	0.781939	0.750509	0.723562	0.699815	0.6785	0.65912	0.641328	0.624873
286	0.872222	0.820639	0.7823	0.750914	0.724003	0.700286	0.678997	0.659639	0.641866	0.625428
287	0.872443	0.820941	0.782658	0.751317	0.724442	0.700755	0.679492	0.660156	0.642402	0.62598
288	0.872662	0.821241	0.783015	0.751718	0.724879	0.701221	0.679984	0.66067	0.642936	0.62653
289	0.87288	0.82154	0.78337	0.752116	0.725313	0.701686	0.680474	0.661182	0.643467	0.627078
290	0.873098	0.821838	0.783724	0.752513	0.725746	0.702148	0.680962	0.661692	0.643996	0.627623
291	0.873314	0.822133	0.784076	0.752909	0.726176	0.702608	0.681447	0.662199	0.644522	0.628166
292	0.873529	0.822428	0.784426	0.753302	0.726605	0.703066	0.68193	0.662705	0.645046	0.628707
293	0.873742	0.822721	0.784774	0.753693	0.727031	0.703522	0.682412	0.663207	0.645568	0.629245
294	0.873955	0.823013	0.785121	0.754083	0.727455	0.703976	0.68289	0.663708	0.646087	0.62978
295	0.874167	0.823303	0.785466	0.75447	0.727878	0.704428	0.683367	0.664206	0.646604	0.630314
296	0.874378	0.823592	0.785809	0.754856	0.728298	0.704877	0.683842	0.664702	0.647119	0.630845
297	0.874587	0.823879	0.786151	0.75524	0.728717	0.705325	0.684314	0.665196	0.647632	0.631374
298	0.874796	0.824165	0.786491	0.755622	0.729133	0.70577	0.684784	0.665688	0.648142	0.6319
299	0.875003	0.82445	0.78683	0.756003	0.729548	0.706214	0.685253	0.666177	0.64865	0.632424
300	0.87521	0.824733	0.787167	0.756381	0.729961	0.706655	0.685719	0.666665	0.649156	0.632946
301	0.875416	0.825015	0.787502	0.756758	0.730372	0.707095	0.686183	0.66715	0.649659	0.633466
302	0.87562	0.825296	0.787836	0.757133	0.730781	0.707532	0.686644	0.667633	0.650161	0.633984
303	0.875824	0.825575	0.788168	0.757507	0.731188	0.707968	0.687104	0.668114	0.65066	0.634499
304	0.876026	0.825853	0.788499	0.757878	0.731593	0.708401	0.687562	0.668593	0.651157	0.635012
305	0.876228	0.826129	0.788828	0.758248	0.731997	0.708833	0.688018	0.669069	0.651652	0.635523
306	0.876428	0.826405	0.789155	0.758617	0.732398	0.709263	0.688472	0.669544	0.652145	0.636032
307	0.876628	0.826679	0.789481	0.758983	0.732798	0.70969	0.688924	0.670017	0.652636	0.636538
308	0.876827	0.826951	0.789806	0.759348	0.733196	0.710116	0.689373	0.670487	0.653124	0.637043
309	0.877025	0.827223	0.790129	0.759711	0.733592	0.71054	0.689821	0.670956	0.653611	0.637545
310	0.877221	0.827493	0.790451	0.760073	0.733987	0.710963	0.690267	0.671422	0.654096	0.638045
311	0.877417	0.827762	0.790771	0.760433	0.734379	0.711383	0.690711	0.671887	0.654578	0.638544
312	0.877612	0.82803	0.791089	0.760792	0.73477	0.711801	0.691153	0.672349	0.655058	0.63904
313	0.877806	0.828296	0.791407	0.761148	0.73516	0.712218	0.691593	0.67281	0.655537	0.639534
314	0.877999	0.828561	0.791723	0.761504	0.735547	0.712633	0.692032	0.673269	0.656013	0.640026
315	0.878192	0.828825	0.792037	0.761857	0.735933	0.713046	0.692468	0.673725	0.656488	0.640516
316	0.878383	0.829088	0.79235	0.762209	0.736317	0.713457	0.692903	0.67418	0.65696	0.641004
317	0.878573	0.82935	0.792661	0.76256	0.7367	0.713867	0.693335	0.674633	0.657431	0.64149
318	0.878763	0.82961	0.792972	0.762909	0.737081	0.714274	0.693766	0.675084	0.657899	0.641974
319	0.878952	0.829869	0.79328	0.763256	0.73746	0.71468	0.694195	0.675533	0.658366	0.642456
320	0.879139	0.830128	0.793588	0.763602	0.737837	0.715084	0.694622	0.67598	0.65883	0.642936
321	0.879326	0.830384	0.793894	0.763947	0.738213	0.715487	0.695048	0.676425	0.659293	0.643414
322	0.879512	0.83064	0.794199	0.76429	0.738587	0.715888	0.695471	0.676869	0.659754	0.64389
323	0.879698	0.830895	0.794502	0.764631	0.73896	0.716287	0.695893	0.67731	0.660213	0.644364
324	0.879882	0.831148	0.794804	0.764971	0.739331	0.716684	0.696313	0.67775	0.66067	0.644837
325	0.880066	0.831401	0.795105	0.765309	0.739701	0.71708	0.696732	0.678188	0.661126	0.645307
326	0.880248	0.831652	0.795404	0.765646	0.740069	0.717474	0.697148	0.678625	0.661579	0.645776
327	0.88043	0.831902	0.795702	0.765982	0.740435	0.717867	0.697563	0.679059	0.662031	0.646243
328	0.880611	0.832151	0.795999	0.766316	0.7408	0.718257	0.697976	0.679492	0.66248	0.646707
329	0.880792	0.832399	0.796295	0.766649	0.741163	0.718646	0.698388	0.679922	0.662928	0.64717
330	0.880971	0.832646	0.796589	0.76698	0.741525	0.719034	0.698797	0.680352	0.663374	0.647632
331	0.88115	0.832892	0.796882	0.76731	0.741885	0.71942	0.699206	0.680779	0.663819	0.648091
332	0.881328	0.833136	0.797174	0.767639	0.742244	0.719804	0.699612	0.681205	0.664261	0.648548
333	0.881505	0.83338	0.797464	0.767966	0.742601	0.720187	0.700017	0.681629	0.664702	0.649004
334	0.881681	0.833623	0.797753	0.768291	0.742957	0.720568	0.70042	0.682051	0.665141	0.649458
335	0.881857	0.833864	0.798041	0.768616	0.743311	0.720948	0.700821	0.682472	0.665579	0.64991
336	0.882032	0.834105	0.798328	0.768939	0.743664	0.721326	0.701221	0.68289	0.666014	0.650361
337	0.882206	0.834344	0.798614	0.76926	0.744015	0.721702	0.70162	0.683308	0.666448	0.650809
338	0.882379	0.834582	0.798898	0.769581	0.744365	0.722077	0.702016	0.683723	0.666881	0.651256
339	0.882551	0.83482	0.799181	0.7699	0.744714	0.722451	0.702411	0.684137	0.667311	0.651702
340	0.882723	0.835056	0.799463	0.770217	0.745061	0.722823	0.702805	0.684549	0.66774	0.652145
341	0.882894	0.835292	0.799744	0.770534	0.745406	0.723193	0.703197	0.68496	0.668167	0.652587
342	0.883064	0.835526	0.800024	0.770849	0.745751	0.723562	0.703587	0.685369	0.668593	0.653027
343	0.883234	0.83576	0.800302	0.771163	0.746094	0.72393	0.703976	0.685777	0.669016	0.653465
344	0.883403	0.835992	0.80058	0.771475	0.746435	0.724296	0.704363	0.686183	0.669439	0.653902
345	0.883571	0.836223	0.800856	0.771786	0.746775	0.724661	0.704749	0.686587	0.669859	0.654337
346	0.883738	0.836454	0.801131	0.772096	0.747114	0.725024	0.705133	0.68699	0.670278	0.65477
347	0.883905	0.836684	0.801405	0.772405	0.747451	0.725385	0.705516	0.687391	0.670696	0.655202
348	0.884071	0.836912	0.801677	0.772713	0.747787	0.725746	0.705897	0.68779	0.671111	0.655632
349	0.884236	0.83714	0.801949	0.773019	0.748122	0.726105	0.706277	0.688188	0.671526	0.656061
350	0.884401	0.837366	0.80222	0.773324	0.748455	0.726462	0.706655	0.688585	0.671938	0.656488
351	0.884564	0.837592	0.802489	0.773628	0.748787	0.726818	0.707032	0.68898	0.672349	0.656913
352	0.884728	0.837817	0.802758	0.77393	0.749118	0.727173	0.707407	0.689373	0.672759	0.657337
353	0.88489	0.838041	0.803025	0.774231	0.749447	0.727526	0.707781	0.689765	0.673167	0.657759
354	0.885052	0.838264	0.803291	0.774532	0.749776	0.727878	0.708154	0.690156	0.673573	0.658179
355	0.885213	0.838486	0.803556	0.77483	0.750102	0.728228	0.708525	0.690545	0.673978	0.658598
356	0.885373	0.838707	0.80382	0.775128	0.750428	0.728578	0.708894	0.690932	0.674381	0.659016
357	0.885533	0.838927	0.804083	0.775425	0.750752	0.728925	0.709263	0.691318	0.674783	0.659432
358	0.885692	0.839147	0.804345	0.77572	0.751075	0.729272	0.709629	0.691703	0.675184	0.659846
359	0.885851	0.839365	0.804606	0.776015	0.751397	0.729617	0.709995	0.692086	0.675583	0.660259
360	0.886009	0.839583	0.804866	0.776308	0.751718	0.729961	0.710359	0.692468	0.67598	0.66067
361	0.886166	0.8398	0.805125	0.7766	0.752037	0.730303	0.710722	0.692848	0.676376	0.66108
362	0.886322	0.840016	0.805383	0.77689	0.752355	0.730645	0.711083	0.693227	0.67677	0.661488
363	0.886478	0.840231	0.80564	0.77718	0.752672	0.730984	0.711443	0.693605	0.677163	0.661895
364	0.886634	0.840445	0.805896	0.777469	0.752987	0.731323	0.711801	0.693981	0.677555	0.662301
365	0.886788	0.840658	0.806151	0.777756	0.753302	0.73166	0.712159	0.694356	0.677945	0.662705
366	0.886942	0.84087	0.806404	0.778043	0.753615	0.731997	0.712514	0.694729	0.678334	0.663107
367	0.887096	0.841082	0.806657	0.778328	0.753927	0.732331	0.712869	0.695101	0.678721	0.663508
368	0.887249	0.841293	0.806909	0.778612	0.754238	0.732665	0.713222	0.695471	0.679107	0.663907
369	0.887401	0.841503	0.80716	0.778895	0.754548	0.732997	0.713574	0.695841	0.679492	0.664306
370	0.887552	0.841712	0.80741	0.779177	0.754856	0.733328	0.713925	0.696208	0.679875	0.664702
371	0.887703	0.84192	0.807659	0.779458	0.755163	0.733658	0.714274	0.696575	0.680256	0.665098
372	0.887854	0.842128	0.807907	0.779738	0.75547	0.733987	0.714622	0.69694	0.680637	0.665491
373	0.888003	0.842335	0.808154	0.780017	0.755775	0.734314	0.714969	0.697304	0.681016	0.665884
374	0.888153	0.84254	0.8084	0.780294	0.756078	0.73464	0.715315	0.697667	0.681393	0.666275
375	0.888301	0.842746	0.808645	0.780571	0.756381	0.734965	0.715659	0.698028	0.68177	0.666665
376	0.888449	0.84295	0.808889	0.780847	0.756683	0.735289	0.716002	0.698388	0.682145	0.667053
377	0.888597	0.843153	0.809133	0.781121	0.756983	0.735612	0.716344	0.698746	0.682518	0.66744
378	0.888743	0.843356	0.809375	0.781395	0.757283	0.735933	0.716684	0.699104	0.68289	0.667825
379	0.88889	0.843558	0.809617	0.781667	0.757581	0.736253	0.717024	0.69946	0.683261	0.66821
380	0.889035	0.843759	0.809857	0.781939	0.757878	0.736572	0.717362	0.699815	0.683631	0.668593
381	0.889181	0.84396	0.810097	0.78221	0.758174	0.73689	0.717699	0.700168	0.683999	0.668974
382	0.889325	0.844159	0.810336	0.782479	0.75847	0.737207	0.718034	0.70052	0.684366	0.669354
383	0.889469	0.844358	0.810574	0.782748	0.758763	0.737523	0.718369	0.700871	0.684732	0.669733
384	0.889613	0.844556	0.810811	0.783015	0.759056	0.737837	0.718702	0.701221	0.685097	0.670111
385	0.889756	0.844754	0.811047	0.783282	0.759348	0.738151	0.719034	0.70157	0.68546	0.670487
386	0.889898	0.84495	0.811282	0.783547	0.759639	0.738463	0.719365	0.701917	0.685822	0.670862
387	0.89004	0.845146	0.811516	0.783812	0.759929	0.738774	0.719695	0.702263	0.686183	0.671236
388	0.890181	0.845342	0.81175	0.784076	0.760217	0.739084	0.720023	0.702608	0.686542	0.671608
389	0.890322	0.845536	0.811982	0.784338	0.760505	0.739393	0.720351	0.702952	0.6869	0.671979
390	0.890462	0.84573	0.812214	0.7846	0.760792	0.739701	0.720677	0.703294	0.687257	0.672349
391	0.890602	0.845923	0.812445	0.784861	0.761077	0.740007	0.721002	0.703636	0.687613	0.672718
392	0.890741	0.846115	0.812675	0.785121	0.761362	0.740313	0.721326	0.703976	0.687967	0.673085
393	0.890879	0.846307	0.812904	0.78538	0.761645	0.740618	0.721649	0.704315	0.688321	0.673451
394	0.891018	0.846498	0.813133	0.785638	0.761928	0.740921	0.721971	0.704653	0.688673	0.673816
395	0.891155	0.846688	0.81336	0.785895	0.762209	0.741224	0.722291	0.704989	0.689024	0.67418
396	0.891292	0.846877	0.813587	0.786151	0.76249	0.741525	0.722611	0.705325	0.689373	0.674542
397	0.891429	0.847066	0.813813	0.786406	0.762769	0.741825	0.722929	0.705659	0.689722	0.674904
398	0.891565	0.847254	0.814038	0.786661	0.763048	0.742124	0.723246	0.705992	0.690069	0.675264
399	0.8917	0.847441	0.814263	0.786914	0.763326	0.742423	0.723562	0.706324	0.690415	0.675622
400	0.891835	0.847628	0.814486	0.787167	0.763602	0.74272	0.723878	0.706655	0.69076	0.67598
401	0.89197	0.847814	0.814709	0.787418	0.763878	0.743016	0.724192	0.706985	0.691104	0.676336
402	0.892104	0.848	0.814931	0.787669	0.764153	0.743311	0.724505	0.707314	0.691447	0.676692
403	0.892238	0.848184	0.815152	0.787919	0.764426	0.743605	0.724816	0.707641	0.691788	0.677046
404	0.892371	0.848368	0.815372	0.788168	0.764699	0.743898	0.725127	0.707968	0.692129	0.677399
405	0.892503	0.848552	0.815592	0.788416	0.764971	0.74419	0.725437	0.708293	0.692468	0.67775
406	0.892635	0.848735	0.815811	0.788663	0.765242	0.744482	0.725746	0.708617	0.692806	0.678101
407	0.892767	0.848917	0.816029	0.78891	0.765512	0.744772	0.726053	0.708941	0.693143	0.67845
408	0.892898	0.849098	0.816246	0.789155	0.765781	0.745061	0.72636	0.709263	0.693479	0.678798
409	0.893029	0.849279	0.816462	0.7894	0.766049	0.745349	0.726666	0.709584	0.693814	0.679146
410	0.893159	0.849459	0.816678	0.789644	0.766316	0.745636	0.72697	0.709904	0.694148	0.679492
411	0.893289	0.849638	0.816893	0.789887	0.766582	0.745922	0.727274	0.710223	0.69448	0.679836
412	0.893418	0.849817	0.817107	0.790129	0.766848	0.746208	0.727576	0.71054	0.694812	0.68018
413	0.893547	0.849996	0.817321	0.79037	0.767112	0.746492	0.727878	0.710857	0.695142	0.680523
414	0.893675	0.850173	0.817534	0.790611	0.767376	0.746775	0.728178	0.711173	0.695471	0.680864
415	0.893803	0.85035	0.817746	0.790851	0.767639	0.747058	0.728478	0.711488	0.6958	0.681205
416	0.89393	0.850526	0.817957	0.791089	0.7679	0.747339	0.728776	0.711801	0.696127	0.681544
417	0.894057	0.850702	0.818167	0.791328	0.768161	0.747619	0.729074	0.712114	0.696453	0.681882
418	0.894184	0.850877	0.818377	0.791565	0.768421	0.747899	0.729371	0.712426	0.696778	0.682219
419	0.89431	0.851052	0.818586	0.791801	0.76868	0.748178	0.729666	0.712736	0.697102	0.682555
420	0.894436	0.851226	0.818795	0.792037	0.768939	0.748455	0.729961	0.713046	0.697425	0.68289
421	0.894561	0.851399	0.819002	0.792272	0.769196	0.748732	0.730255	0.713354	0.697747	0.683224
422	0.894686	0.851572	0.819209	0.792506	0.769453	0.749008	0.730547	0.713662	0.698068	0.683557
423	0.89481	0.851744	0.819416	0.792739	0.769709	0.749283	0.730839	0.713969	0.698388	0.683889
424	0.894934	0.851915	0.819621	0.792972	0.769963	0.749557	0.73113	0.714274	0.698707	0.68422
425	0.895057	0.852086	0.819826	0.793203	0.770217	0.74983	0.73142	0.714579	0.699024	0.684549
426	0.89518	0.852257	0.82003	0.793434	0.770471	0.750102	0.731709	0.714883	0.699341	0.684878
427	0.895303	0.852427	0.820234	0.793664	0.770723	0.750374	0.731997	0.715185	0.699657	0.685206
428	0.895425	0.852596	0.820437	0.793894	0.770975	0.750644	0.732284	0.715487	0.699972	0.685532
429	0.895547	0.852764	0.820639	0.794123	0.771225	0.750914	0.73257	0.715788	0.700286	0.685858
430	0.895668	0.852932	0.82084	0.79435	0.771475	0.751183	0.732855	0.716088	0.700599	0.686183
431	0.895789	0.8531	0.821041	0.794578	0.771724	0.751451	0.733139	0.716386	0.70091	0.686506
432	0.89591	0.853267	0.821241	0.794804	0.771973	0.751718	0.733423	0.716684	0.701221	0.686829
433	0.89603	0.853433	0.821441	0.79503	0.77222	0.751984	0.733705	0.716981	0.701531	0.68715
434	0.896149	0.853599	0.821639	0.795255	0.772467	0.752249	0.733987	0.717277	0.70184	0.687471
435	0.896269	0.853764	0.821838	0.795479	0.772713	0.752513	0.734267	0.717572	0.702148	0.68779
436	0.896387	0.853929	0.822035	0.795702	0.772958	0.752777	0.734547	0.717867	0.702455	0.688109
437	0.896506	0.854093	0.822232	0.795925	0.773202	0.75304	0.734826	0.71816	0.702761	0.688426
438	0.896624	0.854257	0.822428	0.796147	0.773445	0.753302	0.735104	0.718452	0.703066	0.688743
439	0.896742	0.85442	0.822624	0.796368	0.773688	0.753563	0.735381	0.718743	0.70337	0.689059
440	0.896859	0.854582	0.822818	0.796589	0.77393	0.753823	0.735658	0.719034	0.703674	0.689373
441	0.896976	0.854744	0.823013	0.796809	0.774171	0.754083	0.735933	0.719324	0.703976	0.689687
442	0.897092	0.854906	0.823206	0.797028	0.774412	0.754341	0.736208	0.719612	0.704277	0.69
443	0.897208	0.855067	0.823399	0.797246	0.774651	0.754599	0.736481	0.7199	0.704578	0.690312
444	0.897324	0.855227	0.823592	0.797464	0.77489	0.754856	0.736754	0.720187	0.704877	0.690623
445	0.897439	0.855387	0.823784	0.797681	0.775128	0.755112	0.737026	0.720473	0.705176	0.690932
446	0.897554	0.855546	0.823975	0.797897	0.775366	0.755368	0.737297	0.720758	0.705473	0.691241
447	0.897669	0.855705	0.824165	0.798113	0.775602	0.755622	0.737568	0.721043	0.70577	0.691549
448	0.897783	0.855863	0.824355	0.798328	0.775838	0.755876	0.737837	0.721326	0.706066	0.691857
449	0.897897	0.856021	0.824544	0.798542	0.776073	0.756129	0.738106	0.721608	0.706361	0.692163
450	0.89801	0.856178	0.824733	0.798756	0.776308	0.756381	0.738374	0.72189	0.706655	0.692468
451	0.898123	0.856335	0.824921	0.798969	0.776541	0.756633	0.738641	0.722171	0.706948	0.692772
452	0.898236	0.856491	0.825109	0.799181	0.776774	0.756883	0.738907	0.722451	0.707241	0.693076
453	0.898348	0.856647	0.825296	0.799393	0.777006	0.757133	0.739172	0.72273	0.707532	0.693378
454	0.89846	0.856802	0.825482	0.799604	0.777238	0.757382	0.739437	0.723008	0.707823	0.69368
455	0.898571	0.856957	0.825668	0.799814	0.777469	0.757631	0.739701	0.723286	0.708112	0.693981
456	0.898683	0.857111	0.825853	0.800024	0.777699	0.757878	0.739964	0.723562	0.708401	0.694281
457	0.898794	0.857265	0.826037	0.800233	0.777928	0.758125	0.740226	0.723838	0.708689	0.69458
458	0.898904	0.857418	0.826221	0.800441	0.778157	0.758371	0.740487	0.724113	0.708976	0.694878
459	0.899014	0.857571	0.826405	0.800649	0.778385	0.758617	0.740748	0.724387	0.709263	0.695175
460	0.899124	0.857723	0.826587	0.800856	0.778612	0.758861	0.741008	0.724661	0.709548	0.695471
461	0.899233	0.857875	0.82677	0.801062	0.778838	0.759105	0.741267	0.724933	0.709833	0.695767
462	0.899342	0.858027	0.826951	0.801268	0.779064	0.759348	0.741525	0.725205	0.710116	0.696061
463	0.899451	0.858177	0.827132	0.801473	0.779289	0.759591	0.741782	0.725476	0.710399	0.696355
464	0.899559	0.858328	0.827313	0.801677	0.779514	0.759832	0.742039	0.725746	0.710681	0.696648
465	0.899667	0.858478	0.827493	0.801881	0.779738	0.760073	0.742295	0.726015	0.710963	0.69694
466	0.899775	0.858627	0.827672	0.802085	0.779961	0.760313	0.74255	0.726283	0.711243	0.697231
467	0.899882	0.858776	0.827851	0.802287	0.780183	0.760553	0.742805	0.726551	0.711523	0.697522
468	0.899989	0.858925	0.82803	0.802489	0.780405	0.760792	0.743058	0.726818	0.711801	0.697811
469	0.900096	0.859073	0.828207	0.802691	0.780626	0.76103	0.743311	0.727084	0.712079	0.6981
470	0.900202	0.85922	0.828385	0.802891	0.780847	0.761267	0.743563	0.72735	0.712356	0.698388
471	0.900308	0.859367	0.828561	0.803092	0.781066	0.761504	0.743815	0.727614	0.712633	0.698675
472	0.900414	0.859514	0.828737	0.803291	0.781286	0.76174	0.744065	0.727878	0.712908	0.698961
473	0.900519	0.85966	0.828913	0.80349	0.781504	0.761975	0.744315	0.728141	0.713183	0.699246
474	0.900624	0.859806	0.829088	0.803688	0.781722	0.762209	0.744565	0.728403	0.713457	0.699531
475	0.900729	0.859951	0.829263	0.803886	0.781939	0.762443	0.744813	0.728665	0.71373	0.699815
476	0.900833	0.860096	0.829437	0.804083	0.782156	0.762676	0.745061	0.728925	0.714003	0.700098
477	0.900937	0.860241	0.82961	0.80428	0.782371	0.762909	0.745308	0.729185	0.714274	0.70038
478	0.901041	0.860385	0.829783	0.804476	0.782587	0.763141	0.745554	0.729445	0.714545	0.700661
479	0.901144	0.860528	0.829956	0.804671	0.782801	0.763372	0.7458	0.729703	0.714815	0.700942
480	0.901247	0.860671	0.830128	0.804866	0.783015	0.763602	0.746045	0.729961	0.715084	0.701221
481	1	1	0.999997	0.999934	0.999545	0.99836	0.995902	0.991852	0.986096	0.978678
482	1	1	0.999997	0.999935	0.999553	0.998382	0.995948	0.991933	0.986219	0.978848
483	1	1	0.999997	0.999936	0.99956	0.998404	0.995994	0.992013	0.986341	0.979016
484	1	1	0.999998	0.999937	0.999567	0.998425	0.99604	0.992093	0.986462	0.979183
485	1	1	0.999998	0.999939	0.999574	0.998446	0.996085	0.992172	0.986581	0.979349
486	1	1	0.999998	0.99994	0.99958	0.998466	0.996129	0.99225	0.9867	0.979514
487	1	1	0.999998	0.999941	0.999587	0.998487	0.996173	0.992327	0.986818	0.979677
488	1	1	0.999998	0.999942	0.999594	0.998507	0.996217	0.992403	0.986934	0.979839
489	1	1	0.999998	0.999943	0.9996	0.998526	0.99626	0.992479	0.98705	0.98
490	1	1	0.999998	0.999945	0.999606	0.998546	0.996302	0.992553	0.987165	0.980159
491	1	1	0.999998	0.999946	0.999613	0.998565	0.996344	0.992628	0.987278	0.980317
492	1	1	0.999998	0.999947	0.999619	0.998584	0.996386	0.992701	0.987391	0.980474
493	1	1	0.999998	0.999948	0.999625	0.998603	0.996427	0.992773	0.987502	0.980629
494	1	1	0.999998	0.999949	0.999631	0.998621	0.996467	0.992845	0.987613	0.980784
495	1	1	0.999998	0.99995	0.999637	0.99864	0.996508	0.992917	0.987723	0.980937
496	1	1	0.999998	0.999951	0.999642	0.998658	0.996547	0.992987	0.987831	0.981089
497	1	1	0.999998	0.999952	0.999648	0.998675	0.996586	0.993057	0.987939	0.981239
498	1	1	0.999998	0.999953	0.999654	0.998693	0.996625	0.993126	0.988046	0.981389
499	1	1	0.999998	0.999954	0.999659	0.99871	0.996664	0.993194	0.988152	0.981537
500	1	1	0.999998	0.999955	0.999665	0.998727	0.996701	0.993262	0.988256	0.981684
501	1	1	0.999998	0.999955	0.99967	0.998744	0.996739	0.993329	0.98836	0.98183
502	1	1	0.999998	0.999956	0.999675	0.998761	0.996776	0.993395	0.988463	0.981975
503	1	1	0.999999	0.999957	0.99968	0.998777	0.996813	0.993461	0.988565	0.982119
504	1	1	0.999999	0.999958	0.999685	0.998793	0.996849	0.993526	0.988667	0.982261
505	1	1	0.999999	0.999959	0.99969	0.998809	0.996885	0.993591	0.988767	0.982403
506	1	1	0.999999	0.99996	0.999695	0.998825	0.99692	0.993654	0.988866	0.982543
507	1	1	0.999999	0.999961	0.9997	0.998841	0.996955	0.993718	0.988965	0.982682
508	1	1	0.999999	0.999961	0.999705	0.998856	0.99699	0.99378	0.989062	0.98282
509	1	1	0.999999	0.999962	0.99971	0.998871	0.997024	0.993842	0.989159	0.982957
510	1	1	0.999999	0.999963	0.999714	0.998886	0.997058	0.993903	0.989255	0.983093
511	1	1	0.999999	0.999964	0.999719	0.998901	0.997091	0.993964	0.98935	0.983227
512	1	1	0.999999	0.999964	0.999723	0.998916	0.997124	0.994024	0.989445	0.983361
513	1	1	0.999999	0.999965	0.999728	0.99893	0.997157	0.994083	0.989538	0.983493
514	1	1	0.999999	0.999966	0.999732	0.998944	0.997189	0.994142	0.989631	0.983625
515	1	1	0.999999	0.999966	0.999736	0.998958	0.997221	0.994201	0.989722	0.983755
516	1	1	0.999999	0.999967	0.99974	0.998972	0.997253	0.994258	0.989813	0.983885
517	1	1	0.999999	0.999968	0.999744	0.998985	0.997284	0.994315	0.989903	0.984013
518	1	1	0.999999	0.999968	0.999748	0.998999	0.997315	0.994372	0.989993	0.984141
519	1	1	0.999999	0.999969	0.999752	0.999012	0.997345	0.994428	0.990081	0.984267
520	1	1	0.999999	0.99997	0.999756	0.999025	0.997375	0.994483	0.990169	0.984392
521	1	1	0.999999	0.99997	0.99976	0.999038	0.997405	0.994538	0.990256	0.984517
522	1	1	0.999999	0.999971	0.999764	0.999051	0.997435	0.994593	0.990342	0.98464
523	1	1	0.999999	0.999971	0.999768	0.999063	0.997464	0.994646	0.990428	0.984763
524	1	1	0.999999	0.999972	0.999772	0.999076	0.997493	0.9947	0.990512	0.984884
525	1	1	0.999999	0.999972	0.999775	0.999088	0.997521	0.994752	0.990596	0.985004
526	1	1	0.999999	0.999973	0.999779	0.9991	0.997549	0.994805	0.99068	0.985124
527	1	1	0.999999	0.999974	0.999782	0.999112	0.997577	0.994856	0.990762	0.985242
528	1	1	0.999999	0.999974	0.999786	0.999124	0.997605	0.994908	0.990844	0.98536
529	1	1	0.999999	0.999975	0.999789	0.999135	0.997632	0.994958	0.990925	0.985477
530	1	1	0.999999	0.999975	0.999792	0.999147	0.997659	0.995008	0.991005	0.985592
531	1	1	0.999999	0.999976	0.999796	0.999158	0.997686	0.995058	0.991085	0.985707
532	1	1	0.999999	0.999976	0.999799	0.999169	0.997712	0.995107	0.991164	0.985821
533	1	1	0.999999	0.999977	0.999802	0.99918	0.997738	0.995156	0.991242	0.985934
534	1	1	0.999999	0.999977	0.999805	0.999191	0.997764	0.995204	0.991319	0.986046
535	1	1	0.999999	0.999977	0.999808	0.999202	0.997789	0.995252	0.991396	0.986157
536	1	1	0.999999	0.999978	0.999811	0.999213	0.997814	0.995299	0.991472	0.986268
537	1	1	0.999999	0.999978	0.999814	0.999223	0.997839	0.995346	0.991548	0.986377
538	1	1	0.999999	0.999979	0.999817	0.999233	0.997863	0.995392	0.991623	0.986486
539	1	1	0.999999	0.999979	0.99982	0.999243	0.997888	0.995438	0.991697	0.986593
540	1	1	0.999999	0.99998	0.999823	0.999253	0.997912	0.995483	0.99177	0.9867
541	1	1	0.999999	0.99998	0.999826	0.999263	0.997935	0.995528	0.991843	0.986806
542	1	1	0.999999	0.99998	0.999829	0.999273	0.997959	0.995573	0.991915	0.986911
543	1	1	0.999999	0.999981	0.999831	0.999283	0.997982	0.995617	0.991987	0.987016
544	1	1	0.999999	0.999981	0.999834	0.999292	0.998005	0.995661	0.992058	0.987119
545	1	1	1	0.999982	0.999837	0.999302	0.998028	0.995704	0.992128	0.987222
546	1	1	1	0.999982	0.999839	0.999311	0.99805	0.995746	0.992198	0.987323
547	1	1	1	0.999982	0.999842	0.99932	0.998072	0.995789	0.992267	0.987424
548	1	1	1	0.999983	0.999844	0.999329	0.998094	0.995831	0.992335	0.987525
549	1	1	1	0.999983	0.999847	0.999338	0.998116	0.995872	0.992403	0.987624
550	1	1	1	0.999983	0.999849	0.999347	0.998137	0.995913	0.99247	0.987723
551	1	1	1	0.999984	0.999852	0.999355	0.998158	0.995954	0.992537	0.98782
552	1	1	1	0.999984	0.999854	0.999364	0.998179	0.995994	0.992603	0.987918
553	1	1	1	0.999984	0.999856	0.999372	0.9982	0.996034	0.992668	0.988014
554	1	1	1	0.999985	0.999859	0.999381	0.998221	0.996073	0.992733	0.988109
555	1	1	1	0.999985	0.999861	0.999389	0.998241	0.996113	0.992798	0.988204
556	1	1	1	0.999985	0.999863	0.999397	0.998261	0.996151	0.992861	0.988298
557	1	1	1	0.999985	0.999865	0.999405	0.99828	0.99619	0.992924	0.988391
558	1	1	1	0.999986	0.999867	0.999413	0.9983	0.996227	0.992987	0.988484
559	1	1	1	0.999986	0.999869	0.99942	0.998319	0.996265	0.993049	0.988576
560	1	1	1	0.999986	0.999872	0.999428	0.998338	0.996302	0.993111	0.988667
561	1	1	1	0.999987	0.999874	0.999436	0.998357	0.996339	0.993172	0.988757
562	1	1	1	0.999987	0.999876	0.999443	0.998376	0.996375	0.993232	0.988846
563	1	1	1	0.999987	0.999878	0.999451	0.998394	0.996411	0.993292	0.988935
564	1	1	1	0.999987	0.99988	0.999458	0.998413	0.996447	0.993351	0.989024
565	1	1	1	0.999988	0.999881	0.999465	0.998431	0.996482	0.99341	0.989111
566	1	1	1	0.999988	0.999883	0.999472	0.998449	0.996517	0.993468	0.989198
567	1	1	1	0.999988	0.999885	0.999479	0.998466	0.996552	0.993526	0.989284
568	1	1	1	0.999988	0.999887	0.999486	0.998484	0.996586	0.993584	0.989369
569	1	1	1	0.999989	0.999889	0.999493	0.998501	0.99662	0.99364	0.989454
570	1	1	1	0.999989	0.999891	0.9995	0.998518	0.996654	0.993697	0.989538
571	1	1	1	0.999989	0.999892	0.999506	0.998535	0.996687	0.993752	0.989621
572	1	1	1	0.999989	0.999894	0.999513	0.998551	0.99672	0.993808	0.989704
573	1	1	1	0.999989	0.999896	0.999519	0.998568	0.996753	0.993862	0.989786
574	1	1	1	0.99999	0.999897	0.999526	0.998584	0.996785	0.993917	0.989867
575	1	1	1	0.99999	0.999899	0.999532	0.9986	0.996817	0.993971	0.989948
576	1	1	1	0.99999	0.999901	0.999538	0.998616	0.996849	0.994024	0.990028
577	1	1	1	0.99999	0.999902	0.999544	0.998632	0.99688	0.994077	0.990108
578	1	1	1	0.99999	0.999904	0.99955	0.998647	0.996911	0.994129	0.990187
579	1	1	1	0.999991	0.999905	0.999556	0.998663	0.996942	0.994181	0.990265
580	1	1	1	0.999991	0.999907	0.999562	0.998678	0.996972	0.994233	0.990342
581	1	1	1	0.999991	0.999908	0.999568	0.998693	0.997003	0.994284	0.990419
582	1	1	1	0.999991	0.99991	0.999574	0.998708	0.997032	0.994334	0.990496
583	1	1	1	0.999991	0.999911	0.999579	0.998723	0.997062	0.994384	0.990571
584	1	1	1	0.999992	0.999913	0.999585	0.998737	0.997091	0.994434	0.990646
585	1	1	1	0.999992	0.999914	0.99959	0.998751	0.99712	0.994483	0.990721
586	1	1	1	0.999992	0.999915	0.999596	0.998766	0.997149	0.994532	0.990795
587	1	1	1	0.999992	0.999917	0.999601	0.99878	0.997177	0.994581	0.990868
588	1	1	1	0.999992	0.999918	0.999606	0.998793	0.997205	0.994629	0.990941
589	1	1	1	0.999992	0.999919	0.999612	0.998807	0.997233	0.994676	0.991013
590	1	1	1	0.999992	0.999921	0.999617	0.998821	0.997261	0.994723	0.991085
591	1	1	1	0.999993	0.999922	0.999622	0.998834	0.997288	0.99477	0.991156
592	1	1	1	0.999993	0.999923	0.999627	0.998847	0.997315	0.994816	0.991226
593	1	1	1	0.999993	0.999924	0.999632	0.99886	0.997342	0.994862	0.991296
594	1	1	1	0.999993	0.999925	0.999637	0.998873	0.997368	0.994908	0.991366
595	1	1	1	0.999993	0.999927	0.999641	0.998886	0.997394	0.994953	0.991434
596	1	1	1	0.999993	0.999928	0.999646	0.998899	0.99742	0.994997	0.991503
597	1	1	1	0.999993	0.999929	0.999651	0.998911	0.997446	0.995042	0.99157
598	1	1	1	0.999994	0.99993	0.999655	0.998924	0.997471	0.995085	0.991638
599	1	1	1	0.999994	0.999931	0.99966	0.998936	0.997496	0.995129	0.991704
600	1	1	1	0.999994	0.999932	0.999665	0.998948	0.997521	0.995172	0.99177

## Sheet: hollow-fiber-forumula
L in mm	Geom_membraneOxy,Koxy[-], Q=0,5	Geom_membraneOxy,Koxy[-], Q=1	Geom_membraneOxy,Koxy[-], Q=1,5	Geom_membraneOxy,Koxy[-], Q=2	Geom_membraneOxy,Koxy[-], Q=2,5	Geom_membraneOxy,Koxy[-], Q=3	Geom_membraneOxy,Koxy[-], Q=3,5	Geom_membraneOxy,Koxy[-], Q=4	Geom_membraneOxy,Koxy[-], Q=4,5	Geom_membraneOxy,Koxy[-], Q=5
1	0.0768842	0.0392107	0.0263143	0.0198014	0.0158727	0.0132449	0.0113635	0.00995018	0.00884951	0.00796809
2	0.147856	0.0768837	0.0519361	0.0392106	0.0314934	0.0263143	0.0225979	0.0198013	0.0176207	0.0158727
3	0.213372	0.11308	0.0768837	0.0582355	0.0468662	0.0392106	0.0337046	0.0295545	0.0263143	0.0237143
4	0.273851	0.147856	0.101175	0.0768837	0.061995	0.0519361	0.0446851	0.0392106	0.0349309	0.0314934
5	0.32968	0.181269	0.124827	0.0951626	0.0768837	0.064493	0.0555409	0.0487706	0.0434713	0.0392106
6	0.381217	0.213372	0.147856	0.11308	0.091536	0.0768837	0.0662732	0.0582355	0.0519361	0.0468662
7	0.428791	0.244216	0.17028	0.130642	0.105956	0.0891102	0.0768837	0.0676062	0.060326	0.0544609
8	0.472708	0.273851	0.192113	0.147856	0.120147	0.101175	0.0873735	0.0768837	0.0686416	0.061995
9	0.513248	0.302324	0.213372	0.16473	0.134112	0.11308	0.0977441	0.0860688	0.0768837	0.0694691
10	0.550671	0.32968	0.234072	0.181269	0.147856	0.124827	0.107997	0.0951626	0.0850528	0.0768837
11	0.585217	0.355964	0.254226	0.197481	0.161382	0.136418	0.118133	0.104166	0.0931496	0.0842391
12	0.617107	0.381217	0.273851	0.213372	0.174693	0.147856	0.128154	0.11308	0.101175	0.091536
13	0.646545	0.405479	0.292959	0.228948	0.187793	0.159143	0.138062	0.121905	0.109129	0.0987747
14	0.67372	0.428791	0.311564	0.244216	0.200685	0.17028	0.147856	0.130642	0.117013	0.105956
15	0.698806	0.451188	0.32968	0.259182	0.213372	0.181269	0.15754	0.139292	0.124827	0.11308
16	0.721963	0.472708	0.347319	0.273851	0.225858	0.192113	0.167113	0.147856	0.132572	0.120147
17	0.743339	0.493383	0.364494	0.28823	0.238146	0.202814	0.176577	0.156335	0.140248	0.127157
18	0.763072	0.513248	0.381217	0.302324	0.250238	0.213372	0.185934	0.16473	0.147856	0.134112
19	0.781288	0.532334	0.397499	0.316139	0.262139	0.223791	0.195185	0.173041	0.155397	0.141012
20	0.798103	0.550671	0.413354	0.32968	0.273851	0.234072	0.204331	0.181269	0.162872	0.147856
21	0.813626	0.568289	0.428791	0.342953	0.285377	0.244216	0.213372	0.189416	0.17028	0.154646
22	0.827955	0.585217	0.443822	0.355964	0.29672	0.254226	0.222311	0.197481	0.177622	0.161382
23	0.841183	0.601481	0.458457	0.368716	0.307883	0.264104	0.231148	0.205466	0.1849	0.168064
24	0.853393	0.617107	0.472708	0.381217	0.318869	0.273851	0.239885	0.213372	0.192113	0.174693
25	0.864665	0.632121	0.486583	0.393469	0.32968	0.283469	0.248523	0.221199	0.199263	0.181269
26	0.87507	0.646545	0.500093	0.405479	0.34032	0.292959	0.257062	0.228948	0.206349	0.187793
27	0.884675	0.660404	0.513248	0.417252	0.350791	0.302324	0.265505	0.236621	0.213372	0.194265
28	0.893541	0.67372	0.526056	0.428791	0.361095	0.311564	0.273851	0.244216	0.220333	0.200685
29	0.901726	0.686514	0.538528	0.440102	0.371236	0.320683	0.282103	0.251736	0.227233	0.207054
30	0.909282	0.698806	0.550671	0.451188	0.381217	0.32968	0.29026	0.259182	0.234072	0.213372
31	0.916257	0.710616	0.562495	0.462056	0.391038	0.338558	0.298326	0.266553	0.24085	0.21964
32	0.922695	0.721963	0.574007	0.472708	0.400704	0.347319	0.306299	0.273851	0.247568	0.225858
33	0.928639	0.732865	0.585217	0.483149	0.410217	0.355964	0.314182	0.281076	0.254226	0.232026
34	0.934125	0.743339	0.596132	0.493383	0.419578	0.364494	0.321975	0.28823	0.260826	0.238146
35	0.93919	0.753403	0.606759	0.503415	0.428791	0.372911	0.32968	0.295312	0.267368	0.244216
36	0.943865	0.763072	0.617107	0.513248	0.437858	0.381217	0.337297	0.302324	0.273851	0.250238
37	0.948181	0.772362	0.627183	0.522886	0.44678	0.389412	0.344828	0.309266	0.280277	0.256213
38	0.952165	0.781288	0.636993	0.532334	0.455561	0.397499	0.352273	0.316139	0.286646	0.262139
39	0.955843	0.789864	0.646545	0.541594	0.464203	0.405479	0.359633	0.322943	0.292959	0.268018
40	0.959238	0.798103	0.655846	0.550671	0.472708	0.413354	0.36691	0.32968	0.299216	0.273851
41	0.962372	0.80602	0.664902	0.559568	0.481077	0.421124	0.374104	0.33635	0.305418	0.279637
42	0.965265	0.813626	0.67372	0.568289	0.489314	0.428791	0.381217	0.342953	0.311564	0.285377
43	0.967935	0.820934	0.682306	0.576838	0.49742	0.436357	0.388248	0.349491	0.317657	0.291071
44	0.970401	0.827955	0.690666	0.585217	0.505397	0.443822	0.3952	0.355964	0.323695	0.29672
45	0.972676	0.834701	0.698806	0.59343	0.513248	0.451188	0.402072	0.362372	0.32968	0.302324
46	0.974777	0.841183	0.706731	0.601481	0.520974	0.458457	0.408867	0.368716	0.335612	0.307883
47	0.976716	0.84741	0.714449	0.609372	0.528577	0.46563	0.415584	0.374998	0.341491	0.313398
48	0.978506	0.853393	0.721963	0.617107	0.53606	0.472708	0.422225	0.381217	0.347319	0.318869
49	0.980159	0.859142	0.729279	0.624689	0.543424	0.479691	0.428791	0.387374	0.353095	0.324296
50	0.981684	0.864665	0.736403	0.632121	0.550671	0.486583	0.435282	0.393469	0.35882	0.32968
51	0.983093	0.869971	0.743339	0.639405	0.557803	0.493383	0.441699	0.399504	0.364494	0.335021
52	0.984392	0.87507	0.750093	0.646545	0.564822	0.500093	0.448043	0.405479	0.370118	0.34032
53	0.985592	0.879968	0.756669	0.653544	0.571729	0.506714	0.454315	0.411395	0.375692	0.345576
54	0.9867	0.884675	0.763072	0.660404	0.578527	0.513248	0.460516	0.417252	0.381217	0.350791
55	0.987723	0.889197	0.769307	0.667129	0.585217	0.519695	0.466647	0.42305	0.386693	0.355964
56	0.988667	0.893541	0.775377	0.67372	0.591801	0.526056	0.472708	0.428791	0.39212	0.361095
57	0.989538	0.897716	0.781288	0.680181	0.59828	0.532334	0.478699	0.434475	0.397499	0.366186
58	0.990342	0.901726	0.787043	0.686514	0.604656	0.538528	0.484623	0.440102	0.402831	0.371236
59	0.991085	0.90558	0.792647	0.692721	0.610932	0.54464	0.49048	0.445673	0.408116	0.376246
60	0.99177	0.909282	0.798103	0.698806	0.617107	0.550671	0.49627	0.451188	0.413354	0.381217
61	0.992403	0.912839	0.803416	0.70477	0.623185	0.556622	0.501994	0.456649	0.418545	0.386147
62	0.992987	0.916257	0.808589	0.710616	0.629166	0.562495	0.507653	0.462056	0.423691	0.391038
63	0.993526	0.91954	0.813626	0.716346	0.635052	0.568289	0.513248	0.467408	0.428791	0.395891
64	0.994024	0.922695	0.81853	0.721963	0.640845	0.574007	0.518779	0.472708	0.433846	0.400704
65	0.994483	0.925726	0.823306	0.727468	0.646545	0.57965	0.524247	0.477954	0.438856	0.405479
66	0.994908	0.928639	0.827955	0.732865	0.652156	0.585217	0.529654	0.483149	0.443822	0.410217
67	0.995299	0.931437	0.832482	0.738154	0.657677	0.590711	0.534998	0.488291	0.448744	0.414916
68	0.995661	0.934125	0.83689	0.743339	0.66311	0.596132	0.540282	0.493383	0.453622	0.419578
69	0.995994	0.936708	0.841183	0.748421	0.668458	0.601481	0.545506	0.498424	0.458457	0.424203
70	0.996302	0.93919	0.845362	0.753403	0.67372	0.606759	0.550671	0.503415	0.46325	0.428791
71	0.996586	0.941574	0.849431	0.758286	0.678899	0.611968	0.555777	0.508356	0.468	0.433342
72	0.996849	0.943865	0.853393	0.763072	0.683996	0.617107	0.560825	0.513248	0.472708	0.437858
73	0.997091	0.946066	0.857251	0.767764	0.689012	0.622178	0.565815	0.518091	0.477374	0.442337
74	0.997315	0.948181	0.861007	0.772362	0.693948	0.627183	0.570749	0.522886	0.481999	0.44678
75	0.997521	0.950213	0.864665	0.77687	0.698806	0.632121	0.575627	0.527633	0.486583	0.451188
76	0.997712	0.952165	0.868226	0.781288	0.703587	0.636993	0.58045	0.532334	0.491126	0.455561
77	0.997888	0.954041	0.871693	0.785619	0.708291	0.641801	0.585217	0.536987	0.49563	0.459899
78	0.99805	0.955843	0.87507	0.789864	0.712922	0.646545	0.58993	0.541594	0.500093	0.464203
79	0.9982	0.957574	0.878357	0.794025	0.717478	0.651227	0.59459	0.546155	0.504517	0.468472
80	0.998338	0.959238	0.881558	0.798103	0.721963	0.655846	0.599197	0.550671	0.508902	0.472708
81	0.998466	0.960836	0.884675	0.802101	0.726376	0.660404	0.603752	0.555142	0.513248	0.476909
82	0.998584	0.962372	0.88771	0.80602	0.730719	0.664902	0.608254	0.559568	0.517555	0.481077
83	0.998693	0.963847	0.890664	0.809861	0.734993	0.669341	0.612706	0.563951	0.521825	0.485212
84	0.998793	0.965265	0.893541	0.813626	0.7392	0.67372	0.617107	0.568289	0.526056	0.489314
85	0.998886	0.966627	0.896343	0.817316	0.743339	0.678042	0.621458	0.572585	0.53025	0.493383
86	0.998972	0.967935	0.899071	0.820934	0.747413	0.682306	0.62576	0.576838	0.534407	0.49742
87	0.999051	0.969193	0.901726	0.82448	0.751422	0.686514	0.630012	0.581048	0.538528	0.501424
88	0.999124	0.970401	0.904312	0.827955	0.755368	0.690666	0.634217	0.585217	0.542612	0.505397
89	0.999191	0.971561	0.90683	0.831362	0.759251	0.694763	0.638373	0.589344	0.546659	0.509338
90	0.999253	0.972676	0.909282	0.834701	0.763072	0.698806	0.642483	0.59343	0.550671	0.513248
91	0.999311	0.973748	0.911669	0.837974	0.766833	0.702795	0.646545	0.597476	0.554647	0.517126
92	0.999364	0.974777	0.913994	0.841183	0.770534	0.706731	0.650562	0.601481	0.558589	0.520974
93	0.999413	0.975766	0.916257	0.844327	0.774176	0.710616	0.654533	0.605446	0.562495	0.524791
94	0.999458	0.976716	0.91846	0.84741	0.777761	0.714449	0.658458	0.609372	0.566366	0.528577
95	0.9995	0.977629	0.920606	0.850431	0.781288	0.718231	0.662339	0.613259	0.570204	0.532334
96	0.999538	0.978506	0.922695	0.853393	0.78476	0.721963	0.666176	0.617107	0.574007	0.53606
97	0.999574	0.979349	0.924729	0.856296	0.788176	0.725645	0.66997	0.620917	0.577777	0.539757
98	0.999606	0.980159	0.92671	0.859142	0.791538	0.729279	0.67372	0.624689	0.581514	0.543424
99	0.999637	0.980937	0.928639	0.861931	0.794847	0.732865	0.677428	0.628423	0.585217	0.547062
100	0.999665	0.981684	0.930517	0.864665	0.798103	0.736403	0.681093	0.632121	0.588888	0.550671
101	0.99969	0.982403	0.932345	0.867345	0.801308	0.739894	0.684717	0.635781	0.592526	0.554251
102	0.999714	0.983093	0.934125	0.869971	0.804462	0.743339	0.6883	0.639405	0.596132	0.557803
103	0.999736	0.983755	0.935859	0.872546	0.807566	0.746739	0.691842	0.642993	0.599706	0.561327
104	0.999756	0.984392	0.937547	0.87507	0.81062	0.750093	0.695344	0.646545	0.603248	0.564822
105	0.999775	0.985004	0.93919	0.877544	0.813626	0.753403	0.698806	0.650062	0.606759	0.568289
106	0.999792	0.985592	0.94079	0.879968	0.816584	0.756669	0.702228	0.653544	0.610239	0.571729
107	0.999808	0.986157	0.942348	0.882345	0.819496	0.759892	0.705612	0.656991	0.613688	0.575142
108	0.999823	0.9867	0.943865	0.884675	0.822361	0.763072	0.708957	0.660404	0.617107	0.578527
109	0.999837	0.987222	0.945342	0.886958	0.82518	0.76621	0.712265	0.663784	0.620496	0.581886
110	0.999849	0.987723	0.946781	0.889197	0.827955	0.769307	0.715534	0.667129	0.623854	0.585217
111	0.999861	0.988204	0.948181	0.891391	0.830686	0.772362	0.718767	0.670441	0.627183	0.588522
112	0.999872	0.988667	0.949545	0.893541	0.833373	0.775377	0.721963	0.67372	0.630482	0.591801
113	0.999881	0.989111	0.950872	0.89565	0.836018	0.778352	0.725122	0.676967	0.633752	0.595053
114	0.999891	0.989538	0.952165	0.897716	0.838621	0.781288	0.728246	0.680181	0.636993	0.59828
115	0.999899	0.989948	0.953424	0.899741	0.841183	0.784185	0.731334	0.683363	0.640205	0.601481
116	0.999907	0.990342	0.954649	0.901726	0.843703	0.787043	0.734387	0.686514	0.643389	0.604656
117	0.999914	0.990721	0.955843	0.903672	0.846184	0.789864	0.737405	0.689633	0.646545	0.607807
118	0.999921	0.991085	0.957005	0.90558	0.848626	0.792647	0.740389	0.692721	0.649673	0.610932
119	0.999927	0.991434	0.958136	0.907449	0.851028	0.795394	0.743339	0.695779	0.652773	0.614032
120	0.999932	0.99177	0.959238	0.909282	0.853393	0.798103	0.746256	0.698806	0.655846	0.617107
121	0.999937	0.992093	0.96031	0.911078	0.85572	0.800778	0.749139	0.701803	0.658892	0.620158
122	0.999942	0.992403	0.961355	0.912839	0.85801	0.803416	0.75199	0.70477	0.66191	0.623185
123	0.999947	0.992701	0.962372	0.914565	0.860264	0.80602	0.754808	0.707707	0.664902	0.626187
124	0.999951	0.992987	0.963362	0.916257	0.862482	0.808589	0.757594	0.710616	0.667868	0.629166
125	0.999955	0.993262	0.964326	0.917915	0.864665	0.811124	0.760349	0.713495	0.670807	0.632121
126	0.999958	0.993526	0.965265	0.91954	0.866813	0.813626	0.763072	0.716346	0.67372	0.635052
127	0.999961	0.99378	0.966179	0.921134	0.868927	0.816095	0.765765	0.719168	0.676608	0.63796
128	0.999964	0.994024	0.967069	0.922695	0.871007	0.81853	0.768426	0.721963	0.679469	0.640845
129	0.999967	0.994258	0.967935	0.924226	0.873055	0.820934	0.771058	0.724729	0.682306	0.643706
130	0.99997	0.994483	0.968779	0.925726	0.87507	0.823306	0.773659	0.727468	0.685117	0.646545
131	0.999972	0.9947	0.969601	0.927197	0.877053	0.825646	0.776231	0.73018	0.687904	0.649362
132	0.999974	0.994908	0.970401	0.928639	0.879004	0.827955	0.778774	0.732865	0.690666	0.652156
133	0.999976	0.995107	0.971179	0.930052	0.880925	0.830234	0.781288	0.735523	0.693403	0.654927
134	0.999978	0.995299	0.971938	0.931437	0.882815	0.832482	0.783773	0.738154	0.696117	0.657677
135	0.99998	0.995483	0.972676	0.932794	0.884675	0.834701	0.786231	0.74076	0.698806	0.660404
136	0.999981	0.995661	0.973395	0.934125	0.886505	0.83689	0.78866	0.743339	0.701471	0.66311
137	0.999983	0.995831	0.974095	0.93543	0.888307	0.839051	0.791061	0.745893	0.704113	0.665795
138	0.999984	0.995994	0.974777	0.936708	0.89008	0.841183	0.793436	0.748421	0.706731	0.668458
139	0.999985	0.996151	0.975441	0.937961	0.891824	0.843286	0.795783	0.750925	0.709327	0.671099
140	0.999986	0.996302	0.976087	0.93919	0.893541	0.845362	0.798103	0.753403	0.711899	0.67372
141	0.999987	0.996447	0.976716	0.940394	0.895231	0.84741	0.800398	0.755857	0.714449	0.67632
142	0.999988	0.996586	0.977329	0.941574	0.896894	0.849431	0.802666	0.758286	0.716976	0.678899
143	0.999989	0.99672	0.977926	0.942731	0.898531	0.851425	0.804908	0.760691	0.71948	0.681458
144	0.99999	0.996849	0.978506	0.943865	0.900141	0.853393	0.807125	0.763072	0.721963	0.683996
145	0.999991	0.996972	0.979072	0.944977	0.901726	0.855335	0.809317	0.76543	0.724423	0.686514
146	0.999992	0.997091	0.979623	0.946066	0.903286	0.857251	0.811484	0.767764	0.726862	0.689012
147	0.999992	0.997205	0.980159	0.947134	0.904821	0.859142	0.813626	0.770075	0.729279	0.69149
148	0.999993	0.997315	0.980681	0.948181	0.906332	0.861007	0.815744	0.772362	0.731675	0.693948
149	0.999993	0.99742	0.981189	0.949207	0.907819	0.862848	0.817838	0.774627	0.734049	0.696387
150	0.999994	0.997521	0.981684	0.950213	0.909282	0.864665	0.819908	0.77687	0.736403	0.698806
151	0.999994	0.997618	0.982166	0.951199	0.910722	0.866457	0.821954	0.77909	0.738736	0.701206
152	0.999995	0.997712	0.982636	0.952165	0.912139	0.868226	0.823977	0.781288	0.741048	0.703587
153	0.999995	0.997802	0.983093	0.953112	0.913534	0.869971	0.825978	0.783464	0.743339	0.705948
154	0.999996	0.997888	0.983537	0.954041	0.914906	0.871693	0.827955	0.785619	0.745611	0.708291
155	0.999996	0.997971	0.983971	0.954951	0.916257	0.873393	0.82991	0.787752	0.747862	0.710616
156	0.999996	0.99805	0.984392	0.955843	0.917586	0.87507	0.831843	0.789864	0.750093	0.712922
157	0.999996	0.998127	0.984803	0.956717	0.918894	0.876724	0.833754	0.791955	0.752305	0.715209
158	0.999997	0.9982	0.985203	0.957574	0.920182	0.878357	0.835643	0.794025	0.754497	0.717478
159	0.999997	0.998271	0.985592	0.958414	0.921448	0.879968	0.837511	0.796074	0.756669	0.719729
160	0.999997	0.998338	0.985972	0.959238	0.922695	0.881558	0.839357	0.798103	0.758823	0.721963
161	0.999997	0.998404	0.986341	0.960045	0.923922	0.883127	0.841183	0.800112	0.760957	0.724178
162	0.999998	0.998466	0.9867	0.960836	0.92513	0.884675	0.842987	0.802101	0.763072	0.726376
163	0.999998	0.998526	0.98705	0.961612	0.926318	0.886202	0.844772	0.80407	0.765169	0.728556
164	0.999998	0.998584	0.987391	0.962372	0.927488	0.88771	0.846535	0.80602	0.767247	0.730719
165	0.999998	0.99864	0.987723	0.963117	0.928639	0.889197	0.848279	0.80795	0.769307	0.732865
166	0.999998	0.998693	0.988046	0.963847	0.929771	0.890664	0.850003	0.809861	0.771348	0.734993
167	0.999998	0.998744	0.98836	0.964563	0.930886	0.892113	0.851708	0.811753	0.773372	0.737105
168	0.999999	0.998793	0.988667	0.965265	0.931983	0.893541	0.853393	0.813626	0.775377	0.7392
169	0.999999	0.998841	0.988965	0.965953	0.933063	0.894952	0.855059	0.81548	0.777365	0.741278
170	0.999999	0.998886	0.989255	0.966627	0.934125	0.896343	0.856706	0.817316	0.779335	0.743339
171	0.999999	0.99893	0.989538	0.967288	0.935171	0.897716	0.858334	0.819134	0.781288	0.745384
172	0.999999	0.998972	0.989813	0.967935	0.9362	0.899071	0.859944	0.820934	0.783224	0.747413
173	0.999999	0.999012	0.990081	0.96857	0.937213	0.900407	0.861536	0.822716	0.785142	0.749426
174	0.999999	0.999051	0.990342	0.969193	0.938209	0.901726	0.863109	0.82448	0.787043	0.751422
175	0.999999	0.999088	0.990596	0.969803	0.93919	0.903028	0.864665	0.826226	0.788928	0.753403
176	0.999999	0.999124	0.990844	0.970401	0.940155	0.904312	0.866203	0.827955	0.790796	0.755368
177	0.999999	0.999158	0.991085	0.970987	0.941105	0.90558	0.867723	0.829667	0.792647	0.757317
178	0.999999	0.999191	0.991319	0.971561	0.94204	0.90683	0.869226	0.831362	0.794482	0.759251
179	0.999999	0.999223	0.991548	0.972124	0.94296	0.908064	0.870712	0.83304	0.796301	0.761169
180	0.999999	0.999253	0.99177	0.972676	0.943865	0.909282	0.872181	0.834701	0.798103	0.763072
181	0.999999	0.999283	0.991987	0.973217	0.944756	0.910484	0.873634	0.836346	0.79989	0.76496
182	1	0.999311	0.992198	0.973748	0.945633	0.911669	0.87507	0.837974	0.801661	0.766833
183	1	0.999338	0.992403	0.974267	0.946496	0.912839	0.876489	0.839586	0.803416	0.768691
184	1	0.999364	0.992603	0.974777	0.947345	0.913994	0.877893	0.841183	0.805156	0.770534
185	1	0.999389	0.992798	0.975276	0.948181	0.915133	0.879281	0.842763	0.80688	0.772362
186	1	0.999413	0.992987	0.975766	0.949004	0.916257	0.880652	0.844327	0.808589	0.774176
187	1	0.999436	0.993172	0.976246	0.949813	0.917366	0.882009	0.845876	0.810283	0.775976
188	1	0.999458	0.993351	0.976716	0.95061	0.91846	0.883349	0.84741	0.811962	0.777761
189	1	0.999479	0.993526	0.977177	0.951394	0.91954	0.884675	0.848928	0.813626	0.779531
190	1	0.9995	0.993697	0.977629	0.952165	0.920606	0.885985	0.850431	0.815275	0.781288
191	1	0.999519	0.993862	0.978072	0.952924	0.921658	0.887281	0.85192	0.81691	0.783031
192	1	0.999538	0.994024	0.978506	0.953672	0.922695	0.888562	0.853393	0.81853	0.78476
193	1	0.999556	0.994181	0.978932	0.954407	0.923719	0.889828	0.854852	0.820136	0.786475
194	1	0.999574	0.994334	0.979349	0.955131	0.924729	0.89108	0.856296	0.821728	0.788176
195	1	0.99959	0.994483	0.979758	0.955843	0.925726	0.892318	0.857726	0.823306	0.789864
196	1	0.999606	0.994629	0.980159	0.956544	0.92671	0.893541	0.859142	0.824869	0.791538
197	1	0.999622	0.99477	0.980552	0.957233	0.927681	0.894751	0.860543	0.826419	0.793199
198	1	0.999637	0.994908	0.980937	0.957912	0.928639	0.895947	0.861931	0.827955	0.794847
199	1	0.999651	0.995042	0.981314	0.95858	0.929584	0.89713	0.863305	0.829478	0.796482
200	1	0.999665	0.995172	0.981684	0.959238	0.930517	0.898299	0.864665	0.830987	0.798103
201	1	0.999678	0.995299	0.982047	0.959885	0.931437	0.899454	0.866011	0.832482	0.799712
202	1	0.99969	0.995423	0.982403	0.960522	0.932345	0.900597	0.867345	0.833965	0.801308
203	1	0.999702	0.995543	0.982751	0.961148	0.933241	0.901726	0.868664	0.835434	0.802891
204	1	0.999714	0.995661	0.983093	0.961765	0.934125	0.902843	0.869971	0.83689	0.804462
205	1	0.999725	0.995775	0.983427	0.962372	0.934998	0.903947	0.871265	0.838334	0.80602
206	1	0.999736	0.995886	0.983755	0.962969	0.935859	0.905039	0.872546	0.839765	0.807566
207	1	0.999746	0.995994	0.984077	0.963557	0.936708	0.906118	0.873814	0.841183	0.809099
208	1	0.999756	0.9961	0.984392	0.964135	0.937547	0.907185	0.87507	0.842588	0.81062
209	1	0.999766	0.996202	0.984701	0.964705	0.938374	0.908239	0.876313	0.843981	0.812129
210	1	0.999775	0.996302	0.985004	0.965265	0.93919	0.909282	0.877544	0.845362	0.813626
211	1	0.999784	0.996399	0.985301	0.965816	0.939995	0.910313	0.878762	0.84673	0.815111
212	1	0.999792	0.996494	0.985592	0.966359	0.94079	0.911332	0.879968	0.848087	0.816584
213	1	0.999801	0.996586	0.985878	0.966893	0.941574	0.91234	0.881163	0.849431	0.818046
214	1	0.999808	0.996676	0.986157	0.967418	0.942348	0.913336	0.882345	0.850763	0.819496
215	1	0.999816	0.996764	0.986431	0.967935	0.943112	0.914321	0.883516	0.852084	0.820934
216	1	0.999823	0.996849	0.9867	0.968444	0.943865	0.915294	0.884675	0.853393	0.822361
217	1	0.99983	0.996932	0.986963	0.968945	0.944609	0.916257	0.885822	0.85469	0.823776
218	1	0.999837	0.997013	0.987222	0.969438	0.945342	0.917208	0.886958	0.855976	0.82518
219	1	0.999843	0.997091	0.987475	0.969923	0.946066	0.918149	0.888083	0.857251	0.826573
220	1	0.999849	0.997168	0.987723	0.970401	0.946781	0.919079	0.889197	0.858514	0.827955
221	1	0.999855	0.997242	0.987966	0.97087	0.947486	0.919999	0.890299	0.859766	0.829326
222	1	0.999861	0.997315	0.988204	0.971333	0.948181	0.920908	0.891391	0.861007	0.830686
223	1	0.999866	0.997385	0.988438	0.971788	0.948867	0.921807	0.892472	0.862237	0.832035
224	1	0.999872	0.997454	0.988667	0.972236	0.949545	0.922695	0.893541	0.863456	0.833373
225	1	0.999877	0.997521	0.988891	0.972676	0.950213	0.923574	0.894601	0.864665	0.834701
226	1	0.999881	0.997586	0.989111	0.97311	0.950872	0.924442	0.89565	0.865862	0.836018
227	1	0.999886	0.99765	0.989327	0.973537	0.951523	0.925301	0.896688	0.867049	0.837325
228	1	0.999891	0.997712	0.989538	0.973957	0.952165	0.92615	0.897716	0.868226	0.838621
229	1	0.999895	0.997772	0.989745	0.97437	0.952799	0.926989	0.898734	0.869392	0.839907
230	1	0.999899	0.997831	0.989948	0.974777	0.953424	0.927818	0.899741	0.870548	0.841183
231	1	0.999903	0.997888	0.990147	0.975177	0.954041	0.928639	0.900739	0.871693	0.842448
232	1	0.999907	0.997943	0.990342	0.975571	0.954649	0.92945	0.901726	0.872829	0.843703
233	1	0.99991	0.997997	0.990534	0.975959	0.95525	0.930251	0.902704	0.873954	0.844949
234	1	0.999914	0.99805	0.990721	0.976341	0.955843	0.931044	0.903672	0.87507	0.846184
235	1	0.999917	0.998101	0.990905	0.976716	0.956428	0.931828	0.904631	0.876175	0.84741
236	1	0.999921	0.998151	0.991085	0.977086	0.957005	0.932602	0.90558	0.877271	0.848626
237	1	0.999924	0.9982	0.991261	0.97745	0.957574	0.933368	0.906519	0.878357	0.849832
238	1	0.999927	0.998247	0.991434	0.977807	0.958136	0.934125	0.907449	0.879434	0.851028
239	1	0.99993	0.998294	0.991604	0.97816	0.958691	0.934874	0.90837	0.880501	0.852215
240	1	0.999932	0.998338	0.99177	0.978506	0.959238	0.935614	0.909282	0.881558	0.853393
241	1	0.999935	0.998382	0.991933	0.978848	0.959778	0.936346	0.910185	0.882606	0.854561
242	1	0.999937	0.998425	0.992093	0.979183	0.96031	0.937069	0.911078	0.883645	0.85572
243	1	0.99994	0.998466	0.99225	0.979514	0.960836	0.937784	0.911963	0.884675	0.85687
244	1	0.999942	0.998507	0.992403	0.979839	0.961355	0.938491	0.912839	0.885695	0.85801
245	1	0.999945	0.998546	0.992553	0.980159	0.961867	0.93919	0.913706	0.886707	0.859142
246	1	0.999947	0.998584	0.992701	0.980474	0.962372	0.939881	0.914565	0.88771	0.860264
247	1	0.999949	0.998621	0.992845	0.980784	0.96287	0.940564	0.915415	0.888703	0.861377
248	1	0.999951	0.998658	0.992987	0.981089	0.963362	0.94124	0.916257	0.889688	0.862482
249	1	0.999953	0.998693	0.993126	0.981389	0.963847	0.941907	0.91709	0.890664	0.863578
250	1	0.999955	0.998727	0.993262	0.981684	0.964326	0.942567	0.917915	0.891632	0.864665
251	1	0.999956	0.998761	0.993395	0.981975	0.964799	0.94322	0.918732	0.892591	0.865743
252	1	0.999958	0.998793	0.993526	0.982261	0.965265	0.943865	0.91954	0.893541	0.866813
253	1	0.99996	0.998825	0.993654	0.982543	0.965725	0.944503	0.920341	0.894484	0.867874
254	1	0.999961	0.998856	0.99378	0.98282	0.966179	0.945134	0.921134	0.895417	0.868927
255	1	0.999963	0.998886	0.993903	0.983093	0.966627	0.945757	0.921918	0.896343	0.869971
256	1	0.999964	0.998916	0.994024	0.983361	0.967069	0.946374	0.922695	0.89726	0.871007
257	1	0.999966	0.998944	0.994142	0.983625	0.967505	0.946983	0.923464	0.898169	0.872035
258	1	0.999967	0.998972	0.994258	0.983885	0.967935	0.947585	0.924226	0.899071	0.873055
259	1	0.999968	0.998999	0.994372	0.984141	0.96836	0.948181	0.92498	0.899964	0.874066
260	1	0.99997	0.999025	0.994483	0.984392	0.968779	0.94877	0.925726	0.900849	0.87507
261	1	0.999971	0.999051	0.994593	0.98464	0.969193	0.949352	0.926465	0.901726	0.876065
262	1	0.999972	0.999076	0.9947	0.984884	0.969601	0.949928	0.927197	0.902596	0.877053
263	1	0.999973	0.9991	0.994805	0.985124	0.970003	0.950497	0.927922	0.903458	0.878032
264	1	0.999974	0.999124	0.994908	0.98536	0.970401	0.951059	0.928639	0.904312	0.879004
265	1	0.999975	0.999147	0.995008	0.985592	0.970793	0.951615	0.929349	0.905159	0.879968
266	1	0.999976	0.999169	0.995107	0.985821	0.971179	0.952165	0.930052	0.905998	0.880925
267	1	0.999977	0.999191	0.995204	0.986046	0.971561	0.952709	0.930748	0.90683	0.881874
268	1	0.999978	0.999213	0.995299	0.986268	0.971938	0.953246	0.931437	0.907655	0.882815
269	1	0.999979	0.999233	0.995392	0.986486	0.97231	0.953777	0.932119	0.908472	0.883749
270	1	0.99998	0.999253	0.995483	0.9867	0.972676	0.954303	0.932794	0.909282	0.884675
271	1	0.99998	0.999273	0.995573	0.986911	0.973038	0.954822	0.933463	0.910085	0.885594
272	1	0.999981	0.999292	0.995661	0.987119	0.973395	0.955335	0.934125	0.910881	0.886505
273	1	0.999982	0.999311	0.995746	0.987323	0.973748	0.955843	0.934781	0.911669	0.88741
274	1	0.999983	0.999329	0.995831	0.987525	0.974095	0.956345	0.93543	0.912451	0.888307
275	1	0.999983	0.999347	0.995913	0.987723	0.974438	0.956841	0.936072	0.913226	0.889197
276	1	0.999984	0.999364	0.995994	0.987918	0.974777	0.957331	0.936708	0.913994	0.89008
277	1	0.999985	0.999381	0.996073	0.988109	0.975111	0.957816	0.937338	0.914755	0.890956
278	1	0.999985	0.999397	0.996151	0.988298	0.975441	0.958295	0.937961	0.915509	0.891824
279	1	0.999986	0.999413	0.996227	0.988484	0.975766	0.958769	0.938579	0.916257	0.892686
280	1	0.999986	0.999428	0.996302	0.988667	0.976087	0.959238	0.93919	0.916998	0.893541
281	1	0.999987	0.999443	0.996375	0.988846	0.976404	0.959701	0.939795	0.917732	0.89439
282	1	0.999987	0.999458	0.996447	0.989024	0.976716	0.960159	0.940394	0.91846	0.895231
283	1	0.999988	0.999472	0.996517	0.989198	0.977025	0.960612	0.940987	0.919182	0.896066
284	1	0.999988	0.999486	0.996586	0.989369	0.977329	0.961059	0.941574	0.919897	0.896894
285	1	0.999989	0.9995	0.996654	0.989538	0.977629	0.961502	0.942156	0.920606	0.897716
286	1	0.999989	0.999513	0.99672	0.989704	0.977926	0.961939	0.942731	0.921309	0.898531
287	1	0.99999	0.999526	0.996785	0.989867	0.978218	0.962372	0.943301	0.922005	0.899339
288	1	0.99999	0.999538	0.996849	0.990028	0.978506	0.962799	0.943865	0.922695	0.900141
289	1	0.99999	0.99955	0.996911	0.990187	0.978791	0.963222	0.944424	0.923379	0.900937
290	1	0.999991	0.999562	0.996972	0.990342	0.979072	0.96364	0.944977	0.924057	0.901726
291	1	0.999991	0.999574	0.997032	0.990496	0.979349	0.964053	0.945524	0.924729	0.902509
292	1	0.999992	0.999585	0.997091	0.990646	0.979623	0.964462	0.946066	0.925396	0.903286
293	1	0.999992	0.999596	0.997149	0.990795	0.979893	0.964865	0.946603	0.926056	0.904057
294	1	0.999992	0.999606	0.997205	0.990941	0.980159	0.965265	0.947134	0.92671	0.904821
295	1	0.999992	0.999617	0.997261	0.991085	0.980422	0.965659	0.94766	0.927359	0.90558
296	1	0.999993	0.999627	0.997315	0.991226	0.980681	0.96605	0.948181	0.928002	0.906332
297	1	0.999993	0.999637	0.997368	0.991366	0.980937	0.966435	0.948697	0.928639	0.907078
298	1	0.999993	0.999646	0.99742	0.991503	0.981189	0.966817	0.949207	0.92927	0.907819
299	1	0.999994	0.999655	0.997471	0.991638	0.981439	0.967194	0.949713	0.929896	0.908553
300	1	0.999994	0.999665	0.997521	0.99177	0.981684	0.967567	0.950213	0.930517	0.909282
301	1	0.999994	0.999673	0.99757	0.991901	0.981927	0.967935	0.950708	0.931131	0.910005
302	1	0.999994	0.999682	0.997618	0.992029	0.982166	0.9683	0.951199	0.931741	0.910722
303	1	0.999995	0.99969	0.997666	0.992156	0.982403	0.96866	0.951684	0.932345	0.911433
304	1	0.999995	0.999698	0.997712	0.99228	0.982636	0.969016	0.952165	0.932944	0.912139
305	1	0.999995	0.999706	0.997757	0.992403	0.982866	0.969368	0.952641	0.933537	0.912839
306	1	0.999995	0.999714	0.997802	0.992524	0.983093	0.969716	0.953112	0.934125	0.913534
307	1	0.999995	0.999722	0.997845	0.992642	0.983316	0.97006	0.953579	0.934708	0.914223
308	1	0.999996	0.999729	0.997888	0.992759	0.983537	0.970401	0.954041	0.935286	0.914906
309	1	0.999996	0.999736	0.99793	0.992874	0.983755	0.970737	0.954498	0.935859	0.915584
310	1	0.999996	0.999743	0.997971	0.992987	0.983971	0.971069	0.954951	0.936426	0.916257
311	1	0.999996	0.99975	0.998011	0.993098	0.984183	0.971398	0.955399	0.936989	0.916924
312	1	0.999996	0.999756	0.99805	0.993208	0.984392	0.971723	0.955843	0.937547	0.917586
313	1	0.999996	0.999763	0.998089	0.993316	0.984599	0.972045	0.956282	0.938099	0.918243
314	1	0.999996	0.999769	0.998127	0.993422	0.984803	0.972362	0.956717	0.938647	0.918894
315	1	0.999997	0.999775	0.998164	0.993526	0.985004	0.972676	0.957148	0.93919	0.91954
316	1	0.999997	0.999781	0.9982	0.993629	0.985203	0.972987	0.957574	0.939728	0.920182
317	1	0.999997	0.999787	0.998236	0.99373	0.985399	0.973294	0.957996	0.940261	0.920818
318	1	0.999997	0.999792	0.998271	0.99383	0.985592	0.973597	0.958414	0.94079	0.921448
319	1	0.999997	0.999798	0.998305	0.993928	0.985783	0.973897	0.958828	0.941314	0.922074
320	1	0.999997	0.999803	0.998338	0.994024	0.985972	0.974194	0.959238	0.941833	0.922695
321	1	0.999997	0.999808	0.998371	0.994119	0.986157	0.974487	0.959643	0.942348	0.923311
322	1	0.999997	0.999813	0.998404	0.994212	0.986341	0.974777	0.960045	0.942858	0.923922
323	1	0.999998	0.999818	0.998435	0.994304	0.986522	0.975064	0.960443	0.943364	0.924528
324	1	0.999998	0.999823	0.998466	0.994394	0.9867	0.975347	0.960836	0.943865	0.92513
325	1	0.999998	0.999828	0.998497	0.994483	0.986876	0.975627	0.961226	0.944362	0.925726
326	1	0.999998	0.999832	0.998526	0.994571	0.98705	0.975904	0.961612	0.944854	0.926318
327	1	0.999998	0.999837	0.998556	0.994657	0.987222	0.976178	0.961994	0.945342	0.926905
328	1	0.999998	0.999841	0.998584	0.994742	0.987391	0.976449	0.962372	0.945826	0.927488
329	1	0.999998	0.999845	0.998612	0.994825	0.987558	0.976716	0.962746	0.946305	0.928066
330	1	0.999998	0.999849	0.99864	0.994908	0.987723	0.976981	0.963117	0.946781	0.928639
331	1	0.999998	0.999853	0.998667	0.994988	0.987885	0.977242	0.963484	0.947252	0.929207
332	1	0.999998	0.999857	0.998693	0.995068	0.988046	0.977501	0.963847	0.947718	0.929771
333	1	0.999998	0.999861	0.998719	0.995146	0.988204	0.977757	0.964207	0.948181	0.930331
334	1	0.999998	0.999865	0.998744	0.995223	0.98836	0.978009	0.964563	0.94864	0.930886
335	1	0.999998	0.999868	0.998769	0.995299	0.988514	0.978259	0.964916	0.949094	0.931437
336	1	0.999999	0.999872	0.998793	0.995374	0.988667	0.978506	0.965265	0.949545	0.931983
337	1	0.999999	0.999875	0.998817	0.995447	0.988817	0.978751	0.96561	0.949991	0.932525
338	1	0.999999	0.999878	0.998841	0.995519	0.988965	0.978992	0.965953	0.950434	0.933063
339	1	0.999999	0.999881	0.998864	0.995591	0.989111	0.979231	0.966291	0.950872	0.933596
340	1	0.999999	0.999885	0.998886	0.995661	0.989255	0.979467	0.966627	0.951307	0.934125
341	1	0.999999	0.999888	0.998908	0.995729	0.989398	0.9797	0.966959	0.951738	0.93465
342	1	0.999999	0.999891	0.99893	0.995797	0.989538	0.979931	0.967288	0.952165	0.935171
343	1	0.999999	0.999893	0.998951	0.995864	0.989677	0.980159	0.967613	0.952588	0.935687
344	1	0.999999	0.999896	0.998972	0.99593	0.989813	0.980384	0.967935	0.953008	0.9362
345	1	0.999999	0.999899	0.998992	0.995994	0.989948	0.980607	0.968254	0.953424	0.936708
346	1	0.999999	0.999902	0.999012	0.996058	0.990081	0.980828	0.96857	0.953836	0.937213
347	1	0.999999	0.999904	0.999032	0.99612	0.990213	0.981046	0.968883	0.954245	0.937713
348	1	0.999999	0.999907	0.999051	0.996182	0.990342	0.981261	0.969193	0.954649	0.938209
349	1	0.999999	0.999909	0.99907	0.996242	0.99047	0.981474	0.969499	0.955051	0.938702
350	1	0.999999	0.999912	0.999088	0.996302	0.990596	0.981684	0.969803	0.955449	0.93919
351	1	0.999999	0.999914	0.999106	0.996361	0.990721	0.981892	0.970103	0.955843	0.939674
352	1	0.999999	0.999916	0.999124	0.996419	0.990844	0.982098	0.970401	0.956234	0.940155
353	1	0.999999	0.999918	0.999141	0.996475	0.990965	0.982302	0.970695	0.956621	0.940632
354	1	0.999999	0.999921	0.999158	0.996531	0.991085	0.982503	0.970987	0.957005	0.941105
355	1	0.999999	0.999923	0.999175	0.996586	0.991203	0.982702	0.971275	0.957385	0.941574
356	1	0.999999	0.999925	0.999191	0.996641	0.991319	0.982898	0.971561	0.957762	0.94204
357	1	0.999999	0.999927	0.999207	0.996694	0.991434	0.983093	0.971844	0.958136	0.942502
358	1	0.999999	0.999929	0.999223	0.996746	0.991548	0.983285	0.972124	0.958507	0.94296
359	1	0.999999	0.99993	0.999238	0.996798	0.99166	0.983475	0.972402	0.958874	0.943414
360	1	0.999999	0.999932	0.999253	0.996849	0.99177	0.983662	0.972676	0.959238	0.943865
361	1	0.999999	0.999934	0.999268	0.996899	0.991879	0.983848	0.972948	0.959599	0.944313
362	1	0.999999	0.999936	0.999283	0.996948	0.991987	0.984032	0.973217	0.959956	0.944756
363	1	1	0.999937	0.999297	0.996997	0.992093	0.984213	0.973484	0.96031	0.945196
364	1	1	0.999939	0.999311	0.997044	0.992198	0.984392	0.973748	0.960662	0.945633
365	1	1	0.999941	0.999324	0.997091	0.992301	0.98457	0.974009	0.96101	0.946066
366	1	1	0.999942	0.999338	0.997137	0.992403	0.984745	0.974267	0.961355	0.946496
367	1	1	0.999944	0.999351	0.997183	0.992504	0.984918	0.974524	0.961697	0.946922
368	1	1	0.999945	0.999364	0.997227	0.992603	0.98509	0.974777	0.962036	0.947345
369	1	1	0.999947	0.999376	0.997271	0.992701	0.985259	0.975028	0.962372	0.947765
370	1	1	0.999948	0.999389	0.997315	0.992798	0.985427	0.975276	0.962705	0.948181
371	1	1	0.999949	0.999401	0.997357	0.992893	0.985592	0.975522	0.963035	0.948594
372	1	1	0.999951	0.999413	0.997399	0.992987	0.985756	0.975766	0.963362	0.949004
373	1	1	0.999952	0.999424	0.997441	0.99308	0.985918	0.976007	0.963686	0.94941
374	1	1	0.999953	0.999436	0.997481	0.993172	0.986078	0.976246	0.964007	0.949813
375	1	1	0.999955	0.999447	0.997521	0.993262	0.986236	0.976482	0.964326	0.950213
376	1	1	0.999956	0.999458	0.997561	0.993351	0.986393	0.976716	0.964642	0.95061
377	1	1	0.999957	0.999469	0.997599	0.993439	0.986547	0.976948	0.964955	0.951003
378	1	1	0.999958	0.999479	0.997637	0.993526	0.9867	0.977177	0.965265	0.951394
379	1	1	0.999959	0.999489	0.997675	0.993612	0.986851	0.977404	0.965572	0.951781
380	1	1	0.99996	0.9995	0.997712	0.993697	0.987001	0.977629	0.965877	0.952165
381	1	1	0.999961	0.999509	0.997748	0.99378	0.987148	0.977852	0.966179	0.952546
382	1	1	0.999962	0.999519	0.997784	0.993862	0.987294	0.978072	0.966478	0.952924
383	1	1	0.999963	0.999529	0.997819	0.993944	0.987439	0.97829	0.966775	0.953299
384	1	1	0.999964	0.999538	0.997854	0.994024	0.987582	0.978506	0.967069	0.953672
385	1	1	0.999965	0.999547	0.997888	0.994103	0.987723	0.97872	0.96736	0.954041
386	1	1	0.999966	0.999556	0.997921	0.994181	0.987862	0.978932	0.967649	0.954407
387	1	1	0.999967	0.999565	0.997954	0.994258	0.988	0.979142	0.967935	0.95477
388	1	1	0.999968	0.999574	0.997987	0.994334	0.988136	0.979349	0.968219	0.955131
389	1	1	0.999969	0.999582	0.998019	0.994409	0.988271	0.979555	0.9685	0.955488
390	1	1	0.99997	0.99959	0.99805	0.994483	0.988405	0.979758	0.968779	0.955843
391	1	1	0.99997	0.999598	0.998081	0.994557	0.988536	0.979959	0.969055	0.956195
392	1	1	0.999971	0.999606	0.998112	0.994629	0.988667	0.980159	0.969329	0.956544
393	1	1	0.999972	0.999614	0.998142	0.9947	0.988795	0.980356	0.969601	0.95689
394	1	1	0.999973	0.999622	0.998171	0.99477	0.988923	0.980552	0.96987	0.957233
395	1	1	0.999973	0.999629	0.9982	0.994839	0.989049	0.980745	0.970136	0.957574
396	1	1	0.999974	0.999637	0.998229	0.994908	0.989173	0.980937	0.970401	0.957912
397	1	1	0.999975	0.999644	0.998257	0.994975	0.989296	0.981127	0.970663	0.958248
398	1	1	0.999975	0.999651	0.998284	0.995042	0.989418	0.981314	0.970922	0.95858
399	1	1	0.999976	0.999658	0.998312	0.995107	0.989538	0.9815	0.971179	0.95891
400	1	1	0.999977	0.999665	0.998338	0.995172	0.989657	0.981684	0.971434	0.959238
401	1	1	0.999977	0.999671	0.998365	0.995236	0.989774	0.981867	0.971687	0.959563
402	1	1	0.999978	0.999678	0.998391	0.995299	0.989891	0.982047	0.971938	0.959885
403	1	1	0.999978	0.999684	0.998416	0.995361	0.990005	0.982226	0.972186	0.960204
404	1	1	0.999979	0.99969	0.998441	0.995423	0.990119	0.982403	0.972432	0.960522
405	1	1	0.99998	0.999696	0.998466	0.995483	0.990231	0.982578	0.972676	0.960836
406	1	1	0.99998	0.999702	0.998491	0.995543	0.990342	0.982751	0.972918	0.961148
407	1	1	0.999981	0.999708	0.998514	0.995602	0.990452	0.982923	0.973158	0.961458
408	1	1	0.999981	0.999714	0.998538	0.995661	0.990561	0.983093	0.973395	0.961765
409	1	1	0.999982	0.99972	0.998561	0.995718	0.990668	0.983261	0.973631	0.96207
410	1	1	0.999982	0.999725	0.998584	0.995775	0.990774	0.983427	0.973864	0.962372
411	1	1	0.999983	0.999731	0.998607	0.995831	0.990879	0.983592	0.974095	0.962672
412	1	1	0.999983	0.999736	0.998629	0.995886	0.990982	0.983755	0.974325	0.962969
413	1	1	0.999984	0.999741	0.99865	0.99594	0.991085	0.983917	0.974552	0.963264
414	1	1	0.999984	0.999746	0.998672	0.995994	0.991186	0.984077	0.974777	0.963557
415	1	1	0.999984	0.999751	0.998693	0.996047	0.991286	0.984236	0.975	0.963847
416	1	1	0.999985	0.999756	0.998714	0.9961	0.991385	0.984392	0.975221	0.964135
417	1	1	0.999985	0.999761	0.998734	0.996151	0.991483	0.984548	0.975441	0.964421
418	1	1	0.999986	0.999766	0.998754	0.996202	0.99158	0.984701	0.975658	0.964705
419	1	1	0.999986	0.999771	0.998774	0.996253	0.991676	0.984854	0.975873	0.964986
420	1	1	0.999986	0.999775	0.998793	0.996302	0.99177	0.985004	0.976087	0.965265
421	1	1	0.999987	0.99978	0.998813	0.996351	0.991864	0.985154	0.976299	0.965542
422	1	1	0.999987	0.999784	0.998831	0.996399	0.991956	0.985301	0.976508	0.965816
423	1	1	0.999987	0.999788	0.99885	0.996447	0.992048	0.985448	0.976716	0.966088
424	1	1	0.999988	0.999792	0.998868	0.996494	0.992138	0.985592	0.976922	0.966359
425	1	1	0.999988	0.999797	0.998886	0.996541	0.992227	0.985736	0.977127	0.966627
426	1	1	0.999988	0.999801	0.998904	0.996586	0.992316	0.985878	0.977329	0.966893
427	1	1	0.999989	0.999805	0.998921	0.996632	0.992403	0.986018	0.97753	0.967156
428	1	1	0.999989	0.999808	0.998938	0.996676	0.992489	0.986157	0.977728	0.967418
429	1	1	0.999989	0.999812	0.998955	0.99672	0.992575	0.986295	0.977926	0.967678
430	1	1	0.99999	0.999816	0.998972	0.996764	0.992659	0.986431	0.978121	0.967935
431	1	1	0.99999	0.99982	0.998988	0.996807	0.992742	0.986566	0.978314	0.968191
432	1	1	0.99999	0.999823	0.999004	0.996849	0.992825	0.9867	0.978506	0.968444
433	1	1	0.99999	0.999827	0.99902	0.996891	0.992906	0.986832	0.978697	0.968696
434	1	1	0.999991	0.99983	0.999036	0.996932	0.992987	0.986963	0.978885	0.968945
435	1	1	0.999991	0.999833	0.999051	0.996972	0.993067	0.987093	0.979072	0.969193
436	1	1	0.999991	0.999837	0.999066	0.997013	0.993146	0.987222	0.979257	0.969438
437	1	1	0.999991	0.99984	0.999081	0.997052	0.993223	0.987349	0.979441	0.969682
438	1	1	0.999992	0.999843	0.999095	0.997091	0.9933	0.987475	0.979623	0.969923
439	1	1	0.999992	0.999846	0.99911	0.99713	0.993377	0.987599	0.979803	0.970163
440	1	1	0.999992	0.999849	0.999124	0.997168	0.993452	0.987723	0.979982	0.970401
441	1	1	0.999992	0.999852	0.999138	0.997205	0.993526	0.987845	0.980159	0.970636
442	1	1	0.999992	0.999855	0.999151	0.997242	0.9936	0.987966	0.980334	0.97087
443	1	1	0.999993	0.999858	0.999165	0.997279	0.993673	0.988086	0.980509	0.971102
444	1	1	0.999993	0.999861	0.999178	0.997315	0.993744	0.988204	0.980681	0.971333
445	1	1	0.999993	0.999864	0.999191	0.99735	0.993816	0.988321	0.980852	0.971561
446	1	1	0.999993	0.999866	0.999204	0.997385	0.993886	0.988438	0.981021	0.971788
447	1	1	0.999993	0.999869	0.999217	0.99742	0.993955	0.988553	0.981189	0.972013
448	1	1	0.999994	0.999872	0.999229	0.997454	0.994024	0.988667	0.981356	0.972236
449	1	1	0.999994	0.999874	0.999241	0.997488	0.994092	0.988779	0.981521	0.972457
450	1	1	0.999994	0.999877	0.999253	0.997521	0.994159	0.988891	0.981684	0.972676
451	1	1	0.999994	0.999879	0.999265	0.997554	0.994225	0.989002	0.981846	0.972894
452	1	1	0.999994	0.999881	0.999277	0.997586	0.994291	0.989111	0.982007	0.97311
453	1	1	0.999994	0.999884	0.999288	0.997618	0.994356	0.989219	0.982166	0.973324
454	1	1	0.999994	0.999886	0.9993	0.99765	0.99442	0.989327	0.982324	0.973537
455	1	1	0.999995	0.999888	0.999311	0.997681	0.994483	0.989433	0.982481	0.973748
456	1	1	0.999995	0.999891	0.999322	0.997712	0.994546	0.989538	0.982636	0.973957
457	1	1	0.999995	0.999893	0.999333	0.997742	0.994608	0.989642	0.982789	0.974164
458	1	1	0.999995	0.999895	0.999343	0.997772	0.994669	0.989745	0.982942	0.97437
459	1	1	0.999995	0.999897	0.999354	0.997802	0.99473	0.989847	0.983093	0.974574
460	1	1	0.999995	0.999899	0.999364	0.997831	0.99479	0.989948	0.983242	0.974777
461	1	1	0.999995	0.999901	0.999374	0.997859	0.994849	0.990048	0.98339	0.974978
462	1	1	0.999996	0.999903	0.999384	0.997888	0.994908	0.990147	0.983537	0.975177
463	1	1	0.999996	0.999905	0.999394	0.997916	0.994965	0.990245	0.983683	0.975375
464	1	1	0.999996	0.999907	0.999403	0.997943	0.995023	0.990342	0.983828	0.975571
465	1	1	0.999996	0.999909	0.999413	0.997971	0.995079	0.990438	0.983971	0.975766
466	1	1	0.999996	0.99991	0.999422	0.997997	0.995135	0.990534	0.984112	0.975959
467	1	1	0.999996	0.999912	0.999431	0.998024	0.99519	0.990628	0.984253	0.976151
468	1	1	0.999996	0.999914	0.99944	0.99805	0.995245	0.990721	0.984392	0.976341
469	1	1	0.999996	0.999916	0.999449	0.998076	0.995299	0.990813	0.984531	0.976529
470	1	1	0.999996	0.999917	0.999458	0.998101	0.995353	0.990905	0.984667	0.976716
471	1	1	0.999996	0.999919	0.999466	0.998127	0.995405	0.990995	0.984803	0.976902
472	1	1	0.999997	0.999921	0.999475	0.998151	0.995458	0.991085	0.984938	0.977086
473	1	1	0.999997	0.999922	0.999483	0.998176	0.995509	0.991174	0.985071	0.977268
474	1	1	0.999997	0.999924	0.999491	0.9982	0.99556	0.991261	0.985203	0.97745
475	1	1	0.999997	0.999925	0.9995	0.998224	0.995611	0.991348	0.985334	0.977629
476	1	1	0.999997	0.999927	0.999507	0.998247	0.995661	0.991434	0.985464	0.977807
477	1	1	0.999997	0.999928	0.999515	0.998271	0.99571	0.99152	0.985592	0.977984
478	1	1	0.999997	0.99993	0.999523	0.998294	0.995759	0.991604	0.98572	0.97816
479	1	1	0.999997	0.999931	0.999531	0.998316	0.995807	0.991688	0.985846	0.978334
480	1	1	0.999997	0.999932	0.999538	0.998338	0.995854	0.99177	0.985972	0.978506
481	1	1	0.999997	0.999934	0.999545	0.99836	0.995902	0.991852	0.986096	0.978678
482	1	1	0.999997	0.999935	0.999553	0.998382	0.995948	0.991933	0.986219	0.978848
483	1	1	0.999997	0.999936	0.99956	0.998404	0.995994	0.992013	0.986341	0.979016
484	1	1	0.999998	0.999937	0.999567	0.998425	0.99604	0.992093	0.986462	0.979183
485	1	1	0.999998	0.999939	0.999574	0.998446	0.996085	0.992172	0.986581	0.979349
486	1	1	0.999998	0.99994	0.99958	0.998466	0.996129	0.99225	0.9867	0.979514
487	1	1	0.999998	0.999941	0.999587	0.998487	0.996173	0.992327	0.986818	0.979677
488	1	1	0.999998	0.999942	0.999594	0.998507	0.996217	0.992403	0.986934	0.979839
489	1	1	0.999998	0.999943	0.9996	0.998526	0.99626	0.992479	0.98705	0.98
490	1	1	0.999998	0.999945	0.999606	0.998546	0.996302	0.992553	0.987165	0.980159
491	1	1	0.999998	0.999946	0.999613	0.998565	0.996344	0.992628	0.987278	0.980317
492	1	1	0.999998	0.999947	0.999619	0.998584	0.996386	0.992701	0.987391	0.980474
493	1	1	0.999998	0.999948	0.999625	0.998603	0.996427	0.992773	0.987502	0.980629
494	1	1	0.999998	0.999949	0.999631	0.998621	0.996467	0.992845	0.987613	0.980784
495	1	1	0.999998	0.99995	0.999637	0.99864	0.996508	0.992917	0.987723	0.980937
496	1	1	0.999998	0.999951	0.999642	0.998658	0.996547	0.992987	0.987831	0.981089
497	1	1	0.999998	0.999952	0.999648	0.998675	0.996586	0.993057	0.987939	0.981239
498	1	1	0.999998	0.999953	0.999654	0.998693	0.996625	0.993126	0.988046	0.981389
499	1	1	0.999998	0.999954	0.999659	0.99871	0.996664	0.993194	0.988152	0.981537
500	1	1	0.999998	0.999955	0.999665	0.998727	0.996701	0.993262	0.988256	0.981684
501	1	1	0.999998	0.999955	0.99967	0.998744	0.996739	0.993329	0.98836	0.98183
502	1	1	0.999998	0.999956	0.999675	0.998761	0.996776	0.993395	0.988463	0.981975
503	1	1	0.999999	0.999957	0.99968	0.998777	0.996813	0.993461	0.988565	0.982119
504	1	1	0.999999	0.999958	0.999685	0.998793	0.996849	0.993526	0.988667	0.982261
505	1	1	0.999999	0.999959	0.99969	0.998809	0.996885	0.993591	0.988767	0.982403
506	1	1	0.999999	0.99996	0.999695	0.998825	0.99692	0.993654	0.988866	0.982543
507	1	1	0.999999	0.999961	0.9997	0.998841	0.996955	0.993718	0.988965	0.982682
508	1	1	0.999999	0.999961	0.999705	0.998856	0.99699	0.99378	0.989062	0.98282
509	1	1	0.999999	0.999962	0.99971	0.998871	0.997024	0.993842	0.989159	0.982957
510	1	1	0.999999	0.999963	0.999714	0.998886	0.997058	0.993903	0.989255	0.983093
511	1	1	0.999999	0.999964	0.999719	0.998901	0.997091	0.993964	0.98935	0.983227
512	1	1	0.999999	0.999964	0.999723	0.998916	0.997124	0.994024	0.989445	0.983361
513	1	1	0.999999	0.999965	0.999728	0.99893	0.997157	0.994083	0.989538	0.983493
514	1	1	0.999999	0.999966	0.999732	0.998944	0.997189	0.994142	0.989631	0.983625
515	1	1	0.999999	0.999966	0.999736	0.998958	0.997221	0.994201	0.989722	0.983755
516	1	1	0.999999	0.999967	0.99974	0.998972	0.997253	0.994258	0.989813	0.983885
517	1	1	0.999999	0.999968	0.999744	0.998985	0.997284	0.994315	0.989903	0.984013
518	1	1	0.999999	0.999968	0.999748	0.998999	0.997315	0.994372	0.989993	0.984141
519	1	1	0.999999	0.999969	0.999752	0.999012	0.997345	0.994428	0.990081	0.984267
520	1	1	0.999999	0.99997	0.999756	0.999025	0.997375	0.994483	0.990169	0.984392
521	1	1	0.999999	0.99997	0.99976	0.999038	0.997405	0.994538	0.990256	0.984517
522	1	1	0.999999	0.999971	0.999764	0.999051	0.997435	0.994593	0.990342	0.98464
523	1	1	0.999999	0.999971	0.999768	0.999063	0.997464	0.994646	0.990428	0.984763
524	1	1	0.999999	0.999972	0.999772	0.999076	0.997493	0.9947	0.990512	0.984884
525	1	1	0.999999	0.999972	0.999775	0.999088	0.997521	0.994752	0.990596	0.985004
526	1	1	0.999999	0.999973	0.999779	0.9991	0.997549	0.994805	0.99068	0.985124
527	1	1	0.999999	0.999974	0.999782	0.999112	0.997577	0.994856	0.990762	0.985242
528	1	1	0.999999	0.999974	0.999786	0.999124	0.997605	0.994908	0.990844	0.98536
529	1	1	0.999999	0.999975	0.999789	0.999135	0.997632	0.994958	0.990925	0.985477
530	1	1	0.999999	0.999975	0.999792	0.999147	0.997659	0.995008	0.991005	0.985592
531	1	1	0.999999	0.999976	0.999796	0.999158	0.997686	0.995058	0.991085	0.985707
532	1	1	0.999999	0.999976	0.999799	0.999169	0.997712	0.995107	0.991164	0.985821
533	1	1	0.999999	0.999977	0.999802	0.99918	0.997738	0.995156	0.991242	0.985934
534	1	1	0.999999	0.999977	0.999805	0.999191	0.997764	0.995204	0.991319	0.986046
535	1	1	0.999999	0.999977	0.999808	0.999202	0.997789	0.995252	0.991396	0.986157
536	1	1	0.999999	0.999978	0.999811	0.999213	0.997814	0.995299	0.991472	0.986268
537	1	1	0.999999	0.999978	0.999814	0.999223	0.997839	0.995346	0.991548	0.986377
538	1	1	0.999999	0.999979	0.999817	0.999233	0.997863	0.995392	0.991623	0.986486
539	1	1	0.999999	0.999979	0.99982	0.999243	0.997888	0.995438	0.991697	0.986593
540	1	1	0.999999	0.99998	0.999823	0.999253	0.997912	0.995483	0.99177	0.9867
541	1	1	0.999999	0.99998	0.999826	0.999263	0.997935	0.995528	0.991843	0.986806
542	1	1	0.999999	0.99998	0.999829	0.999273	0.997959	0.995573	0.991915	0.986911
543	1	1	0.999999	0.999981	0.999831	0.999283	0.997982	0.995617	0.991987	0.987016
544	1	1	0.999999	0.999981	0.999834	0.999292	0.998005	0.995661	0.992058	0.987119
545	1	1	1	0.999982	0.999837	0.999302	0.998028	0.995704	0.992128	0.987222
546	1	1	1	0.999982	0.999839	0.999311	0.99805	0.995746	0.992198	0.987323
547	1	1	1	0.999982	0.999842	0.99932	0.998072	0.995789	0.992267	0.987424
548	1	1	1	0.999983	0.999844	0.999329	0.998094	0.995831	0.992335	0.987525
549	1	1	1	0.999983	0.999847	0.999338	0.998116	0.995872	0.992403	0.987624
550	1	1	1	0.999983	0.999849	0.999347	0.998137	0.995913	0.99247	0.987723
551	1	1	1	0.999984	0.999852	0.999355	0.998158	0.995954	0.992537	0.98782
552	1	1	1	0.999984	0.999854	0.999364	0.998179	0.995994	0.992603	0.987918
553	1	1	1	0.999984	0.999856	0.999372	0.9982	0.996034	0.992668	0.988014
554	1	1	1	0.999985	0.999859	0.999381	0.998221	0.996073	0.992733	0.988109
555	1	1	1	0.999985	0.999861	0.999389	0.998241	0.996113	0.992798	0.988204
556	1	1	1	0.999985	0.999863	0.999397	0.998261	0.996151	0.992861	0.988298
557	1	1	1	0.999985	0.999865	0.999405	0.99828	0.99619	0.992924	0.988391
558	1	1	1	0.999986	0.999867	0.999413	0.9983	0.996227	0.992987	0.988484
559	1	1	1	0.999986	0.999869	0.99942	0.998319	0.996265	0.993049	0.988576
560	1	1	1	0.999986	0.999872	0.999428	0.998338	0.996302	0.993111	0.988667
561	1	1	1	0.999987	0.999874	0.999436	0.998357	0.996339	0.993172	0.988757
562	1	1	1	0.999987	0.999876	0.999443	0.998376	0.996375	0.993232	0.988846
563	1	1	1	0.999987	0.999878	0.999451	0.998394	0.996411	0.993292	0.988935
564	1	1	1	0.999987	0.99988	0.999458	0.998413	0.996447	0.993351	0.989024
565	1	1	1	0.999988	0.999881	0.999465	0.998431	0.996482	0.99341	0.989111
566	1	1	1	0.999988	0.999883	0.999472	0.998449	0.996517	0.993468	0.989198
567	1	1	1	0.999988	0.999885	0.999479	0.998466	0.996552	0.993526	0.989284
568	1	1	1	0.999988	0.999887	0.999486	0.998484	0.996586	0.993584	0.989369
569	1	1	1	0.999989	0.999889	0.999493	0.998501	0.99662	0.99364	0.989454
570	1	1	1	0.999989	0.999891	0.9995	0.998518	0.996654	0.993697	0.989538
571	1	1	1	0.999989	0.999892	0.999506	0.998535	0.996687	0.993752	0.989621
572	1	1	1	0.999989	0.999894	0.999513	0.998551	0.99672	0.993808	0.989704
573	1	1	1	0.999989	0.999896	0.999519	0.998568	0.996753	0.993862	0.989786
574	1	1	1	0.99999	0.999897	0.999526	0.998584	0.996785	0.993917	0.989867
575	1	1	1	0.99999	0.999899	0.999532	0.9986	0.996817	0.993971	0.989948
576	1	1	1	0.99999	0.999901	0.999538	0.998616	0.996849	0.994024	0.990028
577	1	1	1	0.99999	0.999902	0.999544	0.998632	0.99688	0.994077	0.990108
578	1	1	1	0.99999	0.999904	0.99955	0.998647	0.996911	0.994129	0.990187
579	1	1	1	0.999991	0.999905	0.999556	0.998663	0.996942	0.994181	0.990265
580	1	1	1	0.999991	0.999907	0.999562	0.998678	0.996972	0.994233	0.990342
581	1	1	1	0.999991	0.999908	0.999568	0.998693	0.997003	0.994284	0.990419
582	1	1	1	0.999991	0.99991	0.999574	0.998708	0.997032	0.994334	0.990496
583	1	1	1	0.999991	0.999911	0.999579	0.998723	0.997062	0.994384	0.990571
584	1	1	1	0.999992	0.999913	0.999585	0.998737	0.997091	0.994434	0.990646
585	1	1	1	0.999992	0.999914	0.99959	0.998751	0.99712	0.994483	0.990721
586	1	1	1	0.999992	0.999915	0.999596	0.998766	0.997149	0.994532	0.990795
587	1	1	1	0.999992	0.999917	0.999601	0.99878	0.997177	0.994581	0.990868
588	1	1	1	0.999992	0.999918	0.999606	0.998793	0.997205	0.994629	0.990941
589	1	1	1	0.999992	0.999919	0.999612	0.998807	0.997233	0.994676	0.991013
590	1	1	1	0.999992	0.999921	0.999617	0.998821	0.997261	0.994723	0.991085
591	1	1	1	0.999993	0.999922	0.999622	0.998834	0.997288	0.99477	0.991156
592	1	1	1	0.999993	0.999923	0.999627	0.998847	0.997315	0.994816	0.991226
593	1	1	1	0.999993	0.999924	0.999632	0.99886	0.997342	0.994862	0.991296
594	1	1	1	0.999993	0.999925	0.999637	0.998873	0.997368	0.994908	0.991366
595	1	1	1	0.999993	0.999927	0.999641	0.998886	0.997394	0.994953	0.991434
596	1	1	1	0.999993	0.999928	0.999646	0.998899	0.99742	0.994997	0.991503
597	1	1	1	0.999993	0.999929	0.999651	0.998911	0.997446	0.995042	0.99157
598	1	1	1	0.999994	0.99993	0.999655	0.998924	0.997471	0.995085	0.991638
599	1	1	1	0.999994	0.999931	0.99966	0.998936	0.997496	0.995129	0.991704
600	1	1	1	0.999994	0.999932	0.999665	0.998948	0.997521	0.995172	0.99177
