# Supplementary material for: Design, characterization, and modeling of microcirculation systems with integrated oxygenators
Source: Copernicus journal article supplement (doi:10.5194/jsss-5-221-2016), 2016-06-24
Supplement: Supplementary file 6 [file Variantenrechnungen.xls]

## Sheet: Kp-variiert
t[s]	kO2=0.1	kO2=0.125	kO2=0.15	kO2=0.175	kO2=0.2	kO2=0.225	kO2=0.25	kO2=0.275	kO2=0.3	kO2=0.325	kO2=0.35	kO2=0.375	kO2=0.4
1	100	100	100	100	100	100	100	100	100	100	100	100	100
2	100.001	100.001	100.002	100.002	100.002	100.002	100.003	100.003	100.003	100.003	100.003	100.004	100.004
3	100.004	100.005	100.006	100.006	100.007	100.008	100.008	100.009	100.009	100.01	100.011	100.011	100.012
4	100.009	100.01	100.011	100.012	100.013	100.014	100.015	100.016	100.017	100.018	100.019	100.02	100.021
5	100.015	100.016	100.017	100.019	100.02	100.021	100.022	100.024	100.025	100.026	100.027	100.028	100.03
6	100.021	100.022	100.023	100.025	100.026	100.028	100.029	100.03	100.032	100.033	100.034	100.036	100.037
7	100.026	100.027	100.029	100.03	100.032	100.033	100.035	100.036	100.038	100.039	100.041	100.042	100.044
8	100.03	100.032	100.033	100.035	100.037	100.038	100.04	100.041	100.043	100.044	100.046	100.047	100.049
9	100.034	100.036	100.037	100.039	100.041	100.042	100.044	100.045	100.047	100.049	100.05	100.052	100.053
10	100.038	100.039	100.041	100.043	100.044	100.046	100.048	100.049	100.051	100.052	100.054	100.055	100.057
11	100.041	100.042	100.044	100.046	100.048	100.049	100.051	100.053	100.054	100.056	100.057	100.059	100.06
12	100.044	100.045	100.047	100.049	100.051	100.052	100.054	100.056	100.057	100.059	100.06	100.062	100.063
13	100.046	100.048	100.05	100.052	100.053	100.055	100.057	100.058	100.06	100.062	100.063	100.065	100.066
14	100.049	100.051	100.053	100.054	100.056	100.058	100.06	100.061	100.063	100.064	100.066	100.067	100.069
15	100.052	100.053	100.055	100.057	100.059	100.06	100.062	100.064	100.065	100.067	100.068	100.07	100.071
16	100.054	100.056	100.058	100.059	100.061	100.063	100.064	100.066	100.068	100.069	100.071	100.072	100.073
17	100.056	100.058	100.06	100.062	100.063	100.065	100.067	100.068	100.07	100.071	100.073	100.074	100.075
18	100.058	100.06	100.062	100.064	100.065	100.067	100.069	100.07	100.072	100.073	100.074	100.076	100.077
19	100.06	100.062	100.064	100.066	100.067	100.069	100.071	100.072	100.074	100.075	100.076	100.077	100.079
20	100.062	100.064	100.066	100.068	100.069	100.071	100.072	100.074	100.075	100.077	100.078	100.079	100.08
21	100.064	100.066	100.068	100.069	100.071	100.072	100.074	100.075	100.077	100.078	100.079	100.08	100.082
22	100.064	100.066	100.068	100.07	100.071	100.073	100.074	100.076	100.077	100.078	100.08	100.081	100.082
23	100.046	100.048	100.05	100.053	100.055	100.057	100.059	100.061	100.063	100.064	100.066	100.068	100.069
24	99.955	99.9599	99.9647	99.9695	99.9741	99.9787	99.9832	99.9877	99.992	99.9964	100.001	100.005	100.009
25	99.7229	99.7343	99.7456	99.7567	99.7678	99.7789	99.7898	99.8007	99.8115	99.8223	99.833	99.8436	99.8542
26	99.303	99.326	99.349	99.3719	99.3946	99.4173	99.44	99.4626	99.485	99.5074	99.5298	99.5521	99.5743
27	98.6871	98.7273	98.7674	98.8075	98.8474	98.8873	98.9271	98.9669	99.0065	99.0461	99.0856	99.125	99.1644
28	97.8981	97.9605	98.0229	98.0851	98.1471	98.2091	98.271	98.3328	98.3945	98.4561	98.5177	98.5791	98.6405
29	96.9746	97.0632	97.1518	97.2402	97.3284	97.4166	97.5045	97.5924	97.6801	97.7677	97.8552	97.9425	98.0298
30	95.9562	96.0744	96.1924	96.3102	96.4277	96.5451	96.6622	96.7791	96.8959	97.0124	97.1288	97.2449	97.3609
31	94.8764	95.0268	95.1768	95.3264	95.4757	95.6247	95.7733	95.9216	96.0696	96.2173	96.3647	96.5117	96.6585
32	93.7596	93.9443	94.1284	94.312	94.4951	94.6777	94.8597	95.0412	95.2222	95.4027	95.5827	95.7622	95.9412
33	92.6217	92.8427	93.063	93.2825	93.5011	93.7189	93.936	94.1522	94.3677	94.5824	94.7963	95.0094	95.2217
34	91.4726	91.7321	91.9903	92.2474	92.5032	92.7579	93.0114	93.2638	93.515	93.765	94.0139	94.2616	94.5082
35	90.3187	90.6184	90.9164	91.2127	91.5074	91.8004	92.0918	92.3815	92.6696	92.956	93.2408	93.524	93.8056
36	89.1642	89.5059	89.8454	90.1826	90.5176	90.8503	91.1807	91.5089	91.835	92.1588	92.4804	92.7998	93.117
37	88.0125	88.398	88.7805	89.1601	89.5367	89.9103	90.281	90.6488	91.0136	91.3756	91.7347	92.0909	92.4442
38	86.8667	87.2976	87.7246	88.1478	88.5672	88.9829	89.3948	89.803	90.2075	90.6083	91.0054	91.3988	91.7886
39	85.7299	86.2075	86.6802	87.1483	87.6116	88.0702	88.5241	88.9734	89.4181	89.8582	90.2938	90.7248	91.1513
40	84.6048	85.1302	85.6498	86.1637	86.6717	87.174	87.6706	88.1616	88.647	89.1267	89.6009	90.0696	90.5329
41	83.4937	84.0682	84.6356	85.196	85.7495	86.2961	86.8359	87.3689	87.8952	88.4148	88.9278	89.4342	89.934
42	82.399	83.0233	83.6392	84.2469	84.8464	85.4377	86.021	86.5963	87.1636	87.7231	88.2749	88.8188	89.3552
43	81.3223	81.9972	82.6623	83.3178	83.9636	84.6	85.2269	85.8446	86.453	87.0524	87.6426	88.224	88.7964
44	80.2651	80.9912	81.706	82.4096	83.1021	83.7836	84.4543	85.1144	85.7638	86.4027	87.0313	87.6496	88.2578
45	79.2285	80.0063	80.771	81.523	82.2623	82.9891	83.7036	84.4058	85.096	85.7743	86.4408	87.0958	87.7392
46	78.2133	79.043	79.8581	80.6586	81.4448	82.2168	82.9749	83.7191	84.4498	85.1671	85.8711	86.5621	87.2402
47	77.22	78.1021	78.9676	79.8167	80.6497	81.4668	82.2682	83.0542	83.825	84.5808	85.3218	86.0483	86.7605
48	76.2491	77.1837	78.0997	78.9973	79.877	80.739	81.5834	82.4108	83.2212	84.0151	84.7926	85.554	86.2996
49	75.301	76.2881	77.2545	78.2006	79.1267	80.0332	80.9204	81.7886	82.6383	83.4696	84.2829	85.0786	85.857
50	74.3756	75.4152	76.4319	77.4263	78.3986	79.3493	80.2787	81.1874	82.0756	82.9438	83.7924	84.6216	85.432
51	73.4731	74.5651	75.632	76.6742	77.6924	78.6868	79.658	80.6066	81.5328	82.4373	83.3203	84.1824	85.024
52	72.5934	73.7376	74.8543	75.9442	77.0077	78.0454	79.0579	80.0457	81.0094	81.9493	82.8662	83.7604	84.6325
53	71.7363	72.9325	74.0988	75.2358	76.3443	77.4248	78.4779	79.5043	80.5047	81.4795	82.4294	83.355	84.2568
54	70.9017	72.1496	73.365	74.5488	75.7016	76.8243	77.9174	78.9818	80.0182	81.0271	82.0094	82.9655	83.8963
55	70.0893	71.3885	72.6526	73.8826	75.0793	76.2435	77.376	78.4777	79.5493	80.5916	81.6054	82.5914	83.5503
56	69.2987	70.6488	71.9612	73.2369	74.4768	75.6819	76.8531	77.9914	79.0975	80.1724	81.217	82.232	83.2182
57	68.5298	69.9302	71.2903	72.611	73.8936	75.1389	76.3481	77.5222	78.6621	79.7689	80.8434	81.8867	82.8995
58	67.7819	69.2323	70.6395	72.0047	73.3291	74.614	75.8605	77.0696	78.2426	79.3804	80.4842	81.5549	82.5935
59	67.0549	68.5546	70.0083	71.4173	72.783	74.1067	75.3896	76.6331	77.8383	79.0064	80.1386	81.236	82.2996
60	66.3482	67.8966	69.3961	70.8483	72.2545	73.6163	74.935	76.2121	77.4487	78.6464	79.8062	80.9294	82.0173
61	65.6613	67.2579	68.8026	70.2972	71.7432	73.1423	74.4961	75.8059	77.0733	78.2996	79.4863	80.6347	81.7461
62	64.9939	66.6379	68.2272	69.7634	71.2486	72.6843	74.0722	75.414	76.7113	77.9657	79.1785	80.3513	81.4855
63	64.3454	66.0362	67.6693	69.2465	70.77	72.2415	73.6629	75.0359	76.3624	77.644	78.8822	80.0786	81.2349
64	63.7154	65.4523	67.1285	68.746	70.307	71.8135	73.2676	74.6711	76.026	77.334	78.5968	79.8162	80.9938
65	63.1033	64.8857	66.6042	68.2612	69.859	71.3998	72.8858	74.319	75.7015	77.0352	78.322	79.5637	80.7619
66	62.5088	64.3359	66.096	67.7917	69.4255	70.9998	72.5169	73.9791	75.3886	76.7472	78.0572	79.3204	80.5387
67	61.9314	63.8023	65.6033	67.3369	69.006	70.6131	72.1606	73.651	75.0866	76.4695	77.802	79.0861	80.3237
68	61.3705	63.2846	65.1256	66.8965	68.6	70.2391	71.8162	73.3341	74.7951	76.2016	77.556	78.8603	80.1166
69	60.8257	62.7822	64.6626	66.4698	68.2071	69.8774	71.4834	73.028	74.5138	75.9432	77.3187	78.6425	79.917
70	60.2965	62.2947	64.2136	66.0565	67.8267	69.5275	71.1617	72.7323	74.2421	75.6937	77.0897	78.4326	79.7246
71	59.7825	61.8216	63.7782	65.656	67.4585	69.1889	70.8506	72.4465	73.9796	75.4528	76.8687	78.2299	79.5389
72	59.2832	61.3624	63.356	65.2679	67.1018	68.8613	70.5496	72.1702	73.726	75.2201	76.6553	78.0343	79.3597
73	58.7981	60.9167	62.9466	64.8918	66.7565	68.5442	70.2585	71.903	73.4809	74.9953	76.4492	77.8454	79.1867
74	58.3269	60.484	62.5494	64.5273	66.4219	68.2371	69.9769	71.6446	73.2439	74.778	76.25	77.6629	79.0195
75	57.869	60.064	62.1641	64.1739	66.0977	67.9398	69.7042	71.3946	73.0147	74.5679	76.0574	77.4864	78.8579
76	57.4242	59.6562	61.7902	63.8312	65.7836	67.6519	69.4402	71.1526	72.7929	74.3646	75.8712	77.3158	78.7016
77	56.9919	59.2602	61.4275	63.4988	65.4791	67.3728	69.1846	70.9184	72.5782	74.1679	75.6909	77.1507	78.5505
78	56.5718	58.8756	61.0754	63.1764	65.1838	67.1024	68.9369	70.6915	72.3704	73.9775	75.5165	76.9909	78.4041
79	56.1634	58.5021	60.7336	62.8636	64.8975	66.8403	68.6969	70.4717	72.169	73.793	75.3476	76.8362	78.2624
80	55.7665	58.1392	60.4017	62.5601	64.6198	66.5862	68.4642	70.2586	71.9739	73.6144	75.1839	76.6863	78.1251
81	55.3806	57.7866	60.0795	62.2655	64.3503	66.3397	68.2386	70.0521	71.7848	73.4412	75.0252	76.5409	77.992
82	55.0053	57.4439	59.7665	61.9794	64.0888	66.1005	68.0198	69.8518	71.6014	73.2732	74.8714	76.4	77.8629
83	54.6404	57.1109	59.4624	61.7017	63.835	65.8684	67.8074	69.6575	71.4235	73.1103	74.7221	76.2633	77.7377
84	54.2855	56.7872	59.167	61.4319	63.5885	65.643	67.6013	69.4689	71.2509	72.9522	74.5773	76.1306	77.6161
85	53.9402	56.4724	58.8798	61.1698	63.3491	65.4242	67.4012	69.2858	71.0833	72.7987	74.4367	76.0017	77.498
86	53.6043	56.1663	58.6007	60.915	63.1165	65.2117	67.2069	69.108	70.9205	72.6496	74.3001	75.8766	77.3833
87	53.2774	55.8685	58.3293	60.6674	62.8904	65.0052	67.0181	68.9353	70.7624	72.5047	74.1674	75.7549	77.2717
88	52.9593	55.5789	58.0653	60.4267	62.6707	64.8044	66.8346	68.7674	70.6087	72.3639	74.0383	75.6366	77.1632
89	52.6496	55.297	57.8085	60.1926	62.457	64.6093	66.6562	68.6041	70.4592	72.227	73.9128	75.5215	77.0577
90	52.348	55.0227	57.5587	59.9648	62.2492	64.4195	66.4826	68.4454	70.3138	72.0938	73.7907	75.4095	76.955
91	52.0544	54.7556	57.3155	59.7432	62.047	64.2348	66.3138	68.2909	70.1724	71.9642	73.6719	75.3005	76.8549
92	51.7684	54.4956	57.0789	59.5275	61.8503	64.0551	66.1495	68.1406	70.0347	71.838	73.5561	75.1943	76.7575
93	51.4898	54.2423	56.8484	59.3175	61.6587	63.8802	65.9896	67.9942	69.9006	71.7151	73.4434	75.0909	76.6625
94	51.2183	53.9956	56.6239	59.1131	61.4722	63.7098	65.8338	67.8516	69.77	71.5954	73.3335	74.99	76.5699
95	50.9538	53.7553	56.4053	58.9139	61.2905	63.5439	65.6821	67.7128	69.6428	71.4787	73.2264	74.8917	76.4796
96	50.6959	53.521	56.1922	58.7198	61.1134	63.3822	65.5342	67.5774	69.5187	71.3649	73.122	74.7957	76.3914
97	50.4444	53.2927	55.9845	58.5306	60.9409	63.2246	65.3901	67.4454	69.3977	71.2539	73.0201	74.7021	76.3054
98	50.1993	53.07	55.782	58.3462	60.7727	63.0709	65.2496	67.3167	69.2797	71.1456	72.9206	74.6107	76.2214
99	49.9601	52.8529	55.5846	58.1664	60.6086	62.921	65.1124	67.1911	69.1646	71.0399	72.8235	74.5215	76.1393
100	49.7268	52.6411	55.392	57.9909	60.4486	62.7748	64.9787	67.0685	69.0521	70.9367	72.7287	74.4343	76.0591
101	49.4991	52.4345	55.2041	57.8198	60.2924	62.6321	64.8481	66.9489	68.9424	70.8358	72.636	74.3491	75.9807
102	49.2769	52.2328	55.0207	57.6528	60.14	62.4928	64.7206	66.832	68.8351	70.7373	72.5455	74.2658	75.9041
103	49.06	52.036	54.8417	57.4897	59.9912	62.3568	64.5961	66.7179	68.7304	70.6411	72.4569	74.1843	75.8291
104	48.8482	51.8437	54.6669	57.3305	59.8459	62.2239	64.4744	66.6063	68.6279	70.5469	72.3704	74.1046	75.7557
105	48.6414	51.656	54.4963	57.1749	59.7039	62.0941	64.3555	66.4972	68.5278	70.4549	72.2856	74.0267	75.6839
106	48.4393	51.4727	54.3295	57.023	59.5652	61.9672	64.2393	66.3906	68.4298	70.3648	72.2028	73.9503	75.6136
107	48.2419	51.2935	54.1665	56.8745	59.4296	61.8432	64.1256	66.2863	68.334	70.2767	72.1216	73.8756	75.5447
108	48.049	51.1184	54.0073	56.7293	59.297	61.7219	64.0144	66.1843	68.2402	70.1904	72.0422	73.8024	75.4773
109	47.8604	50.9472	53.8516	56.5874	59.1674	61.6033	63.9057	66.0844	68.1484	70.1059	71.9643	73.7306	75.4111
110	47.676	50.7799	53.6993	56.4486	59.0405	61.4871	63.7992	65.9866	68.0585	70.0231	71.8881	73.6604	75.3463
111	47.4957	50.6162	53.5504	56.3127	58.9164	61.3735	63.695	65.8909	67.9705	69.942	71.8134	73.5915	75.2828
112	47.3193	50.4561	53.4047	56.1799	58.795	61.2623	63.5929	65.7971	67.8842	69.8626	71.7401	73.5239	75.2204
113	47.1467	50.2994	53.2621	56.0498	58.676	61.1533	63.493	65.7052	67.7996	69.7847	71.6683	73.4576	75.1593
114	46.9779	50.1461	53.1225	55.9224	58.5596	61.0466	63.395	65.6152	67.7167	69.7083	71.5978	73.3926	75.0993
115	46.8126	49.996	52.9859	55.7977	58.4455	60.9421	63.299	65.5269	67.6354	69.6333	71.5287	73.3288	75.0403
116	46.6508	49.849	52.8521	55.6755	58.3337	60.8396	63.2049	65.4403	67.5557	69.5598	71.4609	73.2662	74.9825
117	46.4924	49.7051	52.721	55.5558	58.2242	60.7392	63.1126	65.3554	67.4775	69.4877	71.3943	73.2047	74.9257
118	46.3372	49.5641	52.5925	55.4385	58.1168	60.6407	63.0221	65.2722	67.4007	69.4169	71.3289	73.1443	74.8699
119	46.1852	49.426	52.4667	55.3236	58.0116	60.5441	62.9333	65.1904	67.3254	69.3474	71.2647	73.085	74.8151
120	46.0363	49.2906	52.3433	55.2108	57.9083	60.4493	62.8462	65.1102	67.2514	69.2791	71.2016	73.0267	74.7613
121	45.8903	49.1579	52.2223	55.1003	57.807	60.3563	62.7607	65.0314	67.1788	69.212	71.1397	72.9694	74.7083
122	45.7472	49.0278	52.1037	54.9918	57.7076	60.2651	62.6768	64.9541	67.1074	69.1461	71.0788	72.9131	74.6563
123	45.607	48.9003	51.9873	54.8854	57.6101	60.1755	62.5943	64.8781	67.0373	69.0814	71.0189	72.8578	74.6051
124	45.4694	48.7751	51.8732	54.781	57.5144	60.0875	62.5134	64.8035	66.9684	69.0177	70.9601	72.8034	74.5547
125	45.3345	48.6524	51.7611	54.6785	57.4204	60.0012	62.4338	64.7301	66.9007	68.9552	70.9023	72.7499	74.5052
126	45.2021	48.5319	51.6512	54.5779	57.3281	59.9163	62.3557	64.6581	66.8342	68.8937	70.8453	72.6972	74.4565
127	45.0722	48.4136	51.5432	54.479	57.2374	59.8329	62.2789	64.5872	66.7687	68.8331	70.7894	72.6454	74.4086
128	44.9448	48.2976	51.4372	54.382	57.1483	59.751	62.2034	64.5175	66.7043	68.7736	70.7343	72.5944	74.3614
129	44.8196	48.1836	51.3331	54.2866	57.0607	59.6704	62.1291	64.449	66.641	68.7151	70.6801	72.5443	74.3149
130	44.6968	48.0717	51.2308	54.1929	56.9747	59.5912	62.0561	64.3816	66.5787	68.6574	70.6267	72.4949	74.2692
131	44.5761	47.9617	51.1304	54.1008	56.8901	59.5134	61.9843	64.3153	66.5174	68.6007	70.5742	72.4462	74.2241
132	44.4576	47.8537	51.0316	54.0103	56.8069	59.4368	61.9137	64.25	66.4571	68.5449	70.5225	72.3983	74.1798
133	44.3412	47.7476	50.9345	53.9213	56.7251	59.3614	61.8442	64.1858	66.3977	68.4899	70.4716	72.3512	74.1361
134	44.2268	47.6433	50.8391	53.8338	56.6446	59.2873	61.7758	64.1226	66.3392	68.4357	70.4214	72.3047	74.093
135	44.1144	47.5407	50.7453	53.7477	56.5655	59.2143	61.7084	64.0604	66.2816	68.3824	70.372	72.2589	74.0506
136	44.0039	47.4399	50.653	53.663	56.4876	59.1425	61.6421	63.9991	66.2249	68.3299	70.3233	72.2138	74.0088
137	43.8953	47.3408	50.5622	53.5797	56.4109	59.0719	61.5769	63.9387	66.169	68.2781	70.2754	72.1693	73.9675
138	43.7885	47.2433	50.4729	53.4977	56.3354	59.0023	61.5126	63.8793	66.1139	68.2271	70.2281	72.1255	73.9269
139	43.6835	47.1473	50.3851	53.417	56.2611	58.9337	61.4492	63.8207	66.0597	68.1768	70.1815	72.0822	73.8868
140	43.5801	47.0529	50.2986	53.3375	56.188	58.8662	61.3869	63.763	66.0062	68.1273	70.1355	72.0396	73.8473
141	43.4785	46.9601	50.2134	53.2593	56.1159	58.7997	61.3254	63.7061	65.9535	68.0784	70.0902	71.9976	73.8084
142	43.3785	46.8686	50.1296	53.1822	56.0449	58.7342	61.2648	63.65	65.9016	68.0302	70.0455	71.9562	73.7699
143	43.2801	46.7786	50.0471	53.1064	55.975	58.6696	61.2051	63.5947	65.8503	67.9827	70.0015	71.9153	73.732
144	43.1832	46.69	49.9658	53.0316	55.9061	58.606	61.1463	63.5402	65.7998	67.9359	69.958	71.8749	73.6946
145	43.0878	46.6028	49.8858	52.9579	55.8382	58.5433	61.0882	63.4865	65.75	67.8897	69.9151	71.8351	73.6576
146	42.9939	46.5168	49.8069	52.8854	55.7713	58.4814	61.031	63.4335	65.7009	67.8441	69.8728	71.7959	73.6212
147	42.9014	46.4322	49.7292	52.8138	55.7053	58.4205	60.9746	63.3812	65.6524	67.7991	69.831	71.7571	73.5852
148	42.8103	46.3488	49.6526	52.7433	55.6402	58.3603	60.9189	63.3296	65.6045	67.7547	69.7898	71.7189	73.5497
149	42.7206	46.2666	49.5771	52.6738	55.5761	58.301	60.864	63.2787	65.5573	67.7109	69.7492	71.6811	73.5147
150	42.6322	46.1856	49.5027	52.6053	55.5128	58.2425	60.8099	63.2285	65.5107	67.6676	69.709	71.6438	73.4801
151	42.5451	46.1058	49.4294	52.5377	55.4504	58.1848	60.7564	63.1789	65.4648	67.6249	69.6694	71.607	73.4459
152	42.4593	46.0271	49.357	52.4711	55.3889	58.1279	60.7037	63.13	65.4194	67.5828	69.6302	71.5706	73.4121
153	42.3746	45.9496	49.2857	52.4053	55.3281	58.0717	60.6516	63.0817	65.3745	67.5411	69.5915	71.5347	73.3788
154	42.2912	45.8731	49.2153	52.3404	55.2682	58.0162	60.6002	63.0341	65.3303	67.5	69.5534	71.4993	73.3459
155	42.209	45.7976	49.1459	52.2764	55.2091	57.9615	60.5495	62.987	65.2866	67.4595	69.5157	71.4642	73.3133
156	42.1279	45.7232	49.0775	52.2133	55.1507	57.9075	60.4994	62.9405	65.2434	67.4194	69.4784	71.4296	73.2812
157	42.0479	45.6498	49.0099	52.1509	55.0931	57.8541	60.4499	62.8946	65.2008	67.3798	69.4416	71.3954	73.2494
158	41.9691	45.5774	48.9432	52.0894	55.0362	57.8014	60.4011	62.8493	65.1587	67.3406	69.4052	71.3617	73.2181
159	41.8912	45.5059	48.8774	52.0287	54.98	57.7494	60.3528	62.8045	65.1171	67.302	69.3693	71.3283	73.187
160	41.8145	45.4354	48.8125	51.9687	54.9246	57.698	60.3051	62.7602	65.076	67.2638	69.3338	71.2953	73.1564
161	41.7387	45.3658	48.7484	51.9095	54.8698	57.6473	60.2581	62.7165	65.0354	67.226	69.2987	71.2626	73.1261
162	41.664	45.2971	48.6851	51.8511	54.8157	57.5971	60.2115	62.6733	64.9952	67.1887	69.264	71.2304	73.0961
163	41.5902	45.2293	48.6226	51.7933	54.7622	57.5476	60.1656	62.6306	64.9555	67.1518	69.2297	71.1985	73.0665
164	41.5173	45.1623	48.5608	51.7363	54.7094	57.4986	60.1202	62.5884	64.9163	67.1154	69.1958	71.167	73.0372
165	41.4454	45.0962	48.4998	51.6799	54.6573	57.4503	60.0753	62.5467	64.8776	67.0793	69.1623	71.1358	73.0082
166	41.3744	45.0309	48.4396	51.6243	54.6057	57.4025	60.0309	62.5055	64.8392	67.0437	69.1292	71.105	72.9796
167	41.3044	44.9664	48.3801	51.5693	54.5548	57.3552	59.987	62.4647	64.8013	67.0084	69.0964	71.0746	72.9513
168	41.2351	44.9027	48.3213	51.5149	54.5044	57.3085	59.9437	62.4244	64.7639	66.9736	69.064	71.0444	72.9233
169	41.1668	44.8398	48.2633	51.4612	54.4547	57.2624	59.9008	62.3846	64.7268	66.9391	69.0319	71.0146	72.8956
170	41.0992	44.7776	48.2059	51.4081	54.4055	57.2167	59.8584	62.3452	64.6902	66.905	69.0002	70.9851	72.8681
171	41.0325	44.7162	48.1491	51.3556	54.3569	57.1716	59.8165	62.3062	64.6539	66.8713	68.9689	70.9559	72.841
172	40.9666	44.6554	48.0931	51.3037	54.3088	57.127	59.775	62.2677	64.6181	66.838	68.9378	70.9271	72.8142
173	40.9014	44.5954	48.0377	51.2525	54.2612	57.0829	59.734	62.2296	64.5826	66.805	68.9071	70.8985	72.7876
174	40.8371	44.5361	47.9829	51.2017	54.2142	57.0392	59.6935	62.1918	64.5475	66.7723	68.8767	70.8703	72.7613
175	40.7735	44.4775	47.9287	51.1516	54.1677	56.996	59.6534	62.1545	64.5128	66.74	68.8467	70.8423	72.7353
176	40.7106	44.4195	47.8751	51.102	54.1217	56.9533	59.6137	62.1176	64.4785	66.7081	68.8169	70.8146	72.7096
177	40.6484	44.3622	47.8222	51.053	54.0762	56.9111	59.5744	62.0811	64.4445	66.6764	68.7875	70.7872	72.6841
178	40.587	44.3056	47.7698	51.0044	54.0312	56.8693	59.5355	62.0449	64.4108	66.6451	68.7584	70.7601	72.6589
179	40.5262	44.2495	47.718	50.9565	53.9867	56.8279	59.4971	62.0092	64.3776	66.6141	68.7295	70.7333	72.634
180	40.4662	44.1941	47.6667	50.909	53.9427	56.787	59.459	61.9738	64.3446	66.5835	68.701	70.7067	72.6092
181	40.4068	44.1393	47.616	50.862	53.8991	56.7465	59.4214	61.9387	64.312	66.5531	68.6727	70.6804	72.5848
182	40.348	44.0851	47.5659	50.8155	53.8559	56.7064	59.3841	61.9041	64.2797	66.523	68.6447	70.6544	72.5605
183	40.2899	44.0314	47.5163	50.7695	53.8133	56.6668	59.3472	61.8697	64.2478	66.4933	68.617	70.6286	72.5366
184	40.2325	43.9784	47.4672	50.724	53.771	56.6275	59.3107	61.8357	64.2161	66.4638	68.5896	70.603	72.5128
185	40.1756	43.9259	47.4186	50.679	53.7292	56.5887	59.2745	61.8021	64.1848	66.4346	68.5624	70.5778	72.4893
186	40.1194	43.8739	47.3705	50.6344	53.6878	56.5502	59.2388	61.7688	64.1537	66.4057	68.5355	70.5527	72.466
187	40.0637	43.8225	47.3229	50.5903	53.6468	56.5121	59.2033	61.7358	64.123	66.3771	68.5089	70.5279	72.4429
188	40.0087	43.7717	47.2758	50.5466	53.6063	56.4744	59.1682	61.7031	64.0926	66.3488	68.4825	70.5033	72.42
189	39.9542	43.7213	47.2292	50.5034	53.5661	56.437	59.1335	61.6707	64.0625	66.3207	68.4563	70.479	72.3974
190	39.9002	43.6715	47.1831	50.4606	53.5263	56.4	59.0991	61.6387	64.0326	66.2929	68.4305	70.4549	72.375
191	39.8469	43.6221	47.1374	50.4182	53.4869	56.3634	59.065	61.607	64.0031	66.2654	68.4048	70.431	72.3528
192	39.794	43.5733	47.0921	50.3762	53.4479	56.3271	59.0312	61.5755	63.9738	66.2381	68.3794	70.4074	72.3307
193	39.7417	43.525	47.0473	50.3346	53.4093	56.2912	58.9978	61.5444	63.9448	66.2111	68.3542	70.3839	72.3089
194	39.69	43.4771	47.003	50.2935	53.3711	56.2556	58.9646	61.5135	63.916	66.1843	68.3293	70.3607	72.2873
195	39.6387	43.4297	46.9591	50.2527	53.3332	56.2204	58.9318	61.483	63.8876	66.1578	68.3046	70.3377	72.2659
196	39.588	43.3828	46.9156	50.2123	53.2956	56.1855	58.8993	61.4527	63.8593	66.1315	68.2801	70.3149	72.2447
197	39.5377	43.3363	46.8725	50.1723	53.2585	56.1509	58.8671	61.4227	63.8314	66.1055	68.2558	70.2923	72.2236
198	39.488	43.2902	46.8298	50.1327	53.2216	56.1166	58.8352	61.393	63.8037	66.0796	68.2318	70.2699	72.2028
199	39.4387	43.2447	46.7875	50.0934	53.1851	56.0826	58.8036	61.3635	63.7762	66.0541	68.2079	70.2477	72.1821
200	39.3899	43.1995	46.7457	50.0545	53.149	56.049	58.7722	61.3343	63.749	66.0287	68.1843	70.2257	72.1616
201	39.3416	43.1548	46.7042	50.016	53.1131	56.0156	58.7412	61.3054	63.7221	66.0036	68.1609	70.2039	72.1413
202	39.2937	43.1104	46.6631	49.9778	53.0776	55.9826	58.7104	61.2767	63.6953	65.9787	68.1377	70.1823	72.1212
203	39.2463	43.0665	46.6223	49.94	53.0425	55.9499	58.6799	61.2483	63.6689	65.954	68.1147	70.1608	72.1013
204	39.1993	43.023	46.582	49.9025	53.0076	55.9174	58.6497	61.2201	63.6426	65.9295	68.0919	70.1396	72.0815
205	39.1528	42.9799	46.542	49.8654	52.973	55.8852	58.6197	61.1922	63.6166	65.9052	68.0693	70.1185	72.0619
206	39.1067	42.9372	46.5024	49.8286	52.9388	55.8533	58.59	61.1645	63.5908	65.8812	68.0469	70.0976	72.0424
207	39.061	42.8949	46.4631	49.7921	52.9049	55.8217	58.5606	61.137	63.5652	65.8573	68.0246	70.0769	72.0232
208	39.0157	42.853	46.4242	49.7559	52.8712	55.7904	58.5314	61.1098	63.5398	65.8337	68.0026	70.0564	72.004
209	38.9709	42.8114	46.3856	49.72	52.8378	55.7593	58.5024	61.0829	63.5147	65.8102	67.9807	70.036	71.9851
210	38.9264	42.7702	46.3474	49.6845	52.8048	55.7285	58.4737	61.0561	63.4897	65.787	67.9591	70.0159	71.9663
211	38.8823	42.7294	46.3095	49.6493	52.772	55.698	58.4453	61.0296	63.465	65.7639	67.9376	69.9958	71.9476
212	38.8387	42.6889	46.2719	49.6143	52.7395	55.6677	58.4171	61.0033	63.4405	65.7411	67.9163	69.976	71.9291
213	38.7954	42.6488	46.2347	49.5797	52.7072	55.6377	58.3891	60.9772	63.4161	65.7184	67.8951	69.9563	71.9108
214	38.7525	42.609	46.1977	49.5454	52.6753	55.6079	58.3613	60.9513	63.392	65.6959	67.8742	69.9367	71.8926
215	38.7099	42.5696	46.1611	49.5113	52.6436	55.5784	58.3338	60.9257	63.3681	65.6736	67.8534	69.9174	71.8746
216	38.6678	42.5305	46.1248	49.4776	52.6122	55.5492	58.3065	60.9002	63.3444	65.6515	67.8327	69.8981	71.8567
217	38.626	42.4917	46.0888	49.4441	52.581	55.5201	58.2795	60.875	63.3208	65.6295	67.8123	69.8791	71.8389
218	38.5845	42.4533	46.0531	49.4109	52.5501	55.4913	58.2526	60.85	63.2975	65.6078	67.792	69.8602	71.8213
219	38.5434	42.4152	46.0177	49.378	52.5194	55.4628	58.226	60.8252	63.2744	65.5862	67.7719	69.8414	71.8038
220	38.5027	42.3774	45.9826	49.3453	52.489	55.4344	58.1996	60.8005	63.2514	65.5648	67.7519	69.8228	71.7865
221	38.4623	42.3399	45.9478	49.3129	52.4589	55.4063	58.1734	60.7761	63.2286	65.5435	67.7321	69.8043	71.7693
222	38.4222	42.3027	45.9132	49.2808	52.429	55.3784	58.1474	60.7518	63.206	65.5224	67.7124	69.786	71.7522
223	38.3825	42.2659	45.879	49.2489	52.3993	55.3508	58.1216	60.7278	63.1835	65.5015	67.6929	69.7678	71.7353
224	38.3431	42.2293	45.845	49.2173	52.3698	55.3234	58.096	60.7039	63.1613	65.4807	67.6735	69.7498	71.7185
225	38.304	42.193	45.8113	49.1859	52.3406	55.2961	58.0707	60.6803	63.1392	65.4601	67.6543	69.7319	71.7018
226	38.2652	42.1571	45.7779	49.1548	52.3117	55.2691	58.0455	60.6568	63.1173	65.4397	67.6353	69.7141	71.6852
227	38.2268	42.1214	45.7447	49.124	52.2829	55.2423	58.0205	60.6335	63.0956	65.4194	67.6164	69.6965	71.6688
228	38.1886	42.086	45.7118	49.0933	52.2544	55.2157	57.9957	60.6103	63.074	65.3993	67.5976	69.679	71.6525
229	38.1508	42.0508	45.6791	49.0629	52.2261	55.1894	57.9711	60.5874	63.0526	65.3793	67.579	69.6616	71.6363
230	38.1132	42.016	45.6467	49.0328	52.198	55.1632	57.9467	60.5646	63.0313	65.3595	67.5605	69.6444	71.6203
231	38.076	41.9814	45.6146	49.0029	52.1701	55.1372	57.9224	60.542	63.0102	65.3398	67.5421	69.6273	71.6043
232	38.039	41.9471	45.5827	48.9732	52.1425	55.1114	57.8984	60.5196	62.9893	65.3203	67.5239	69.6103	71.5885
233	38.0024	41.9131	45.551	48.9437	52.115	55.0858	57.8745	60.4973	62.9685	65.3009	67.5058	69.5934	71.5728
234	37.966	41.8793	45.5196	48.9145	52.0878	55.0604	57.8508	60.4752	62.9479	65.2817	67.4879	69.5767	71.5572
235	37.9299	41.8458	45.4885	48.8855	52.0607	55.0352	57.8273	60.4532	62.9274	65.2626	67.4701	69.5601	71.5418
236	37.8941	41.8125	45.4575	48.8567	52.0339	55.0102	57.804	60.4315	62.9071	65.2436	67.4524	69.5436	71.5264
237	37.8586	41.7795	45.4268	48.8281	52.0073	54.9854	57.7808	60.4099	62.8869	65.2248	67.4348	69.5272	71.5111
238	37.8233	41.7468	45.3964	48.7997	51.9808	54.9607	57.7578	60.3884	62.8669	65.2061	67.4174	69.511	71.496
239	37.7883	41.7142	45.3661	48.7716	51.9546	54.9362	57.735	60.3671	62.847	65.1875	67.4001	69.4948	71.481
240	37.7535	41.682	45.3361	48.7436	51.9285	54.9119	57.7123	60.3459	62.8273	65.1691	67.3829	69.4788	71.466
241	37.7191	41.6499	45.3063	48.7159	51.9027	54.8878	57.6898	60.3249	62.8077	65.1508	67.3658	69.4629	71.4512
242	37.6848	41.6181	45.2767	48.6883	51.877	54.8639	57.6675	60.3041	62.7882	65.1327	67.3489	69.4471	71.4365
243	37.6509	41.5866	45.2474	48.661	51.8515	54.8401	57.6453	60.2834	62.7689	65.1146	67.3321	69.4314	71.4219
244	37.6172	41.5553	45.2182	48.6338	51.8262	54.8165	57.6233	60.2628	62.7497	65.0967	67.3154	69.4159	71.4074
245	37.5837	41.5242	45.1893	48.6069	51.8011	54.7931	57.6014	60.2424	62.7307	65.079	67.2988	69.4004	71.393
246	37.5505	41.4933	45.1606	48.5801	51.7761	54.7698	57.5797	60.2222	62.7118	65.0613	67.2823	69.385	71.3787
247	37.5175	41.4626	45.132	48.5536	51.7514	54.7467	57.5581	60.202	62.693	65.0438	67.266	69.3698	71.3644
248	37.4847	41.4322	45.1037	48.5272	51.7268	54.7238	57.5367	60.1821	62.6743	65.0264	67.2497	69.3546	71.3503
249	37.4522	41.402	45.0756	48.501	51.7024	54.701	57.5155	60.1622	62.6558	65.0091	67.2336	69.3396	71.3363
250	37.4199	41.372	45.0477	48.475	51.6781	54.6784	57.4943	60.1425	62.6374	64.9919	67.2176	69.3247	71.3224
251	37.3879	41.3422	45.02	48.4491	51.654	54.6559	57.4734	60.1229	62.6191	64.9749	67.2017	69.3098	71.3086
252	37.3561	41.3126	44.9924	48.4235	51.6301	54.6336	57.4525	60.1035	62.601	64.9579	67.1859	69.2951	71.2948
253	37.3245	41.2832	44.9651	48.398	51.6064	54.6114	57.4319	60.0842	62.583	64.9411	67.1702	69.2804	71.2812
254	37.2931	41.2541	44.9379	48.3727	51.5828	54.5894	57.4113	60.065	62.5651	64.9244	67.1546	69.2659	71.2676
255	37.2619	41.2251	44.911	48.3476	51.5593	54.5675	57.3909	60.046	62.5473	64.9078	67.1391	69.2515	71.2542
256	37.231	41.1963	44.8842	48.3226	51.5361	54.5458	57.3707	60.027	62.5296	64.8913	67.1237	69.2371	71.2408
257	37.2003	41.1678	44.8576	48.2978	51.513	54.5243	57.3505	60.0083	62.5121	64.8749	67.1084	69.2229	71.2275
258	37.1697	41.1394	44.8312	48.2732	51.49	54.5028	57.3305	59.9896	62.4946	64.8587	67.0932	69.2087	71.2143
259	37.1394	41.1112	44.8049	48.2488	51.4672	54.4816	57.3107	59.971	62.4773	64.8425	67.0782	69.1946	71.2012
260	37.1093	41.0832	44.7789	48.2245	51.4445	54.4604	57.2909	59.9526	62.4601	64.8264	67.0632	69.1806	71.1882
261	37.0794	41.0554	44.753	48.2004	51.422	54.4394	57.2713	59.9343	62.443	64.8105	67.0483	69.1668	71.1752
262	37.0497	41.0278	44.7273	48.1764	51.3997	54.4186	57.2519	59.9161	62.426	64.7946	67.0335	69.153	71.1624
263	37.0203	41.0003	44.7017	48.1526	51.3775	54.3978	57.2325	59.8981	62.4092	64.7789	67.0188	69.1393	71.1496
264	36.991	40.9731	44.6763	48.1289	51.3554	54.3772	57.2133	59.8801	62.3924	64.7632	67.0042	69.1256	71.1369
265	36.9618	40.946	44.6511	48.1054	51.3335	54.3568	57.1942	59.8623	62.3758	64.7477	66.9897	69.1121	71.1243
266	36.9329	40.9191	44.6261	48.0821	51.3117	54.3365	57.1752	59.8446	62.3592	64.7322	66.9753	69.0987	71.1117
267	36.9042	40.8924	44.6012	48.0589	51.2901	54.3163	57.1564	59.827	62.3428	64.7169	66.9609	69.0853	71.0993
268	36.8757	40.8659	44.5765	48.0359	51.2686	54.2962	57.1376	59.8095	62.3264	64.7016	66.9467	69.072	71.0869
269	36.8473	40.8395	44.5519	48.013	51.2472	54.2763	57.119	59.7921	62.3102	64.6865	66.9326	69.0588	71.0746
270	36.8192	40.8133	44.5275	47.9902	51.226	54.2565	57.1005	59.7748	62.2941	64.6714	66.9185	69.0457	71.0624
271	36.7912	40.7873	44.5033	47.9676	51.2049	54.2368	57.0821	59.7576	62.2781	64.6565	66.9045	69.0327	71.0502
272	36.7634	40.7614	44.4792	47.9451	51.184	54.2172	57.0639	59.7406	62.2621	64.6416	66.8906	69.0197	71.0381
273	36.7358	40.7357	44.4553	47.9228	51.1631	54.1978	57.0457	59.7236	62.2463	64.6268	66.8768	69.0068	71.0261
274	36.7083	40.7102	44.4315	47.9006	51.1424	54.1785	57.0277	59.7068	62.2306	64.6121	66.8631	68.994	71.0142
275	36.6811	40.6848	44.4078	47.8786	51.1219	54.1593	57.0098	59.69	62.2149	64.5975	66.8495	68.9813	71.0024
276	36.654	40.6596	44.3843	47.8567	51.1014	54.1402	56.9919	59.6734	62.1994	64.583	66.836	68.9687	70.9906
277	36.6271	40.6345	44.361	47.8349	51.0811	54.1212	56.9742	59.6569	62.1839	64.5686	66.8225	68.9561	70.9789
278	36.6003	40.6096	44.3378	47.8133	51.0609	54.1024	56.9566	59.6404	62.1686	64.5542	66.8091	68.9437	70.9672
279	36.5737	40.5849	44.3147	47.7918	51.0409	54.0837	56.9391	59.6241	62.1533	64.54	66.7958	68.9312	70.9557
280	36.5473	40.5603	44.2918	47.7704	51.0209	54.065	56.9218	59.6079	62.1382	64.5258	66.7826	68.9189	70.9442
281	36.5211	40.5359	44.2691	47.7492	51.0012	54.0466	56.9045	59.5917	62.1231	64.5118	66.7695	68.9067	70.9327
282	36.4967	40.5133	44.2481	47.7297	50.983	54.0297	56.8888	59.5771	62.1095	64.4991	66.7576	68.8957	70.9225
283	36.4934	40.5111	44.247	47.7295	50.9835	54.0309	56.8906	59.5794	62.1122	64.5022	66.761	68.8993	70.9263
284	36.569	40.5858	44.3204	47.8016	51.0543	54.1001	56.9581	59.6452	62.1763	64.5644	66.8214	68.9577	70.9827
285	36.7974	40.8089	44.5381	48.0137	51.2607	54.3007	57.1529	59.8341	62.3591	64.7412	66.9919	69.1221	71.1408
286	37.2272	41.2277	44.9459	48.4103	51.646	54.6747	57.5154	60.185	62.6984	65.0687	67.3078	69.4261	71.433
287	37.8655	41.8492	45.5505	48.9979	52.2164	55.2278	58.0512	60.7034	63.1993	65.5521	67.7736	69.8743	71.8636
288	38.6861	42.6478	46.3268	49.752	52.9481	55.937	58.7379	61.3675	63.8408	66.1709	68.3697	70.4476	72.414
289	39.6469	43.5823	47.2349	50.6335	53.803	56.7653	59.5394	62.1423	64.5888	66.8921	69.064	71.1151	73.0547
290	40.7049	44.6105	48.2334	51.6021	54.7418	57.6743	60.4185	62.9915	65.4081	67.6816	69.8237	71.8449	73.7547
291	41.8243	45.6976	49.288	52.6244	55.7317	58.6318	61.3438	63.8846	66.269	68.5104	70.6204	72.6097	74.4877
292	42.9796	46.8182	50.374	53.6759	56.7488	59.6145	62.2923	64.799	67.1495	69.3571	71.4335	73.3894	75.234
293	44.154	47.9558	51.4751	54.7405	57.7771	60.6069	63.2488	65.7199	68.035	70.2075	72.249	74.1701	75.9804
294	45.3375	49.1006	52.5813	55.8084	58.8071	61.5992	64.2039	66.638	68.9164	71.0525	73.058	74.9436	76.7185
295	46.5239	50.2462	53.6865	56.8737	59.8329	62.5858	65.1518	67.5476	69.7882	71.8869	73.8555	75.7045	77.4435
296	47.7089	51.3886	54.7868	57.9325	60.8505	63.563	66.0889	68.4453	70.647	72.7074	74.6383	76.4501	78.1524
297	48.8893	52.5246	55.8791	58.9816	61.8573	64.5279	67.0127	69.3286	71.4906	73.5118	75.4042	77.1783	78.8435
298	50.0619	53.6512	56.9605	60.0186	62.8506	65.4783	67.921	70.1956	72.317	74.2985	76.1519	77.8878	79.5155
299	51.2238	54.7658	58.0286	61.0411	63.8283	66.4122	68.812	71.0445	73.1248	75.066	76.8801	78.5775	80.1677
300	52.3723	55.8657	59.0809	62.0468	64.7884	67.3277	69.684	71.8739	73.9126	75.8133	77.5878	79.2466	80.7992
301	53.5049	56.9486	60.1153	63.0338	65.7292	68.2233	70.5355	72.6826	74.6795	76.5394	78.2743	79.8945	81.4096
302	54.6195	58.0127	61.13	64.0005	66.6491	69.0977	71.3655	73.4694	75.4244	77.2436	78.9389	80.5208	81.9986
303	55.7144	59.0562	62.1237	64.9456	67.547	69.9498	72.1731	74.2339	76.1469	77.9255	79.5815	81.1252	82.5662
304	56.7882	60.0782	63.0952	65.8682	68.4222	70.779	72.9578	74.9754	76.8467	78.5849	80.2018	81.7078	83.1124
305	57.8398	61.0775	64.0438	66.7677	69.2741	71.5848	73.7191	75.6937	77.5235	79.2217	80.8	82.2688	83.6374
306	58.8686	62.0535	64.9689	67.6435	70.1023	72.3671	74.4571	76.389	78.1776	79.8362	81.3763	82.8084	84.1417
307	59.874	63.0059	65.8702	68.4955	70.9068	73.1259	75.1718	77.0613	78.8092	80.4285	81.931	83.327	84.6258
308	60.8556	63.9344	66.7476	69.3236	71.6876	73.8612	75.8634	77.7109	79.4185	80.9992	82.4647	83.8253	85.0901
309	61.8132	64.8389	67.601	70.128	72.4449	74.5733	76.5321	78.3382	80.006	81.5488	82.9779	84.3037	85.5354
310	62.7468	65.7194	68.4306	70.9088	73.1788	75.2625	77.1785	78.9436	80.5723	82.0777	83.4712	84.763	85.9622
311	63.6564	66.5761	69.2365	71.6662	73.8899	75.9292	77.8029	79.5276	81.1179	82.5866	83.9451	85.2037	86.3713
312	64.5421	67.409	70.019	72.4006	74.5784	76.5739	78.4059	80.0909	81.6433	83.076	84.4004	85.6265	86.7633
313	65.4041	68.2185	70.7785	73.1123	75.2447	77.197	78.9879	80.6339	82.1492	83.5467	84.8377	86.0321	87.139
314	66.2427	69.005	71.5153	73.802	75.8895	77.7992	79.5497	81.1572	82.6362	83.9993	85.2577	86.4213	87.4989
315	67.0582	69.7687	72.2299	74.4699	76.5131	78.3809	80.0916	81.6616	83.105	84.4344	85.661	86.7945	87.8439
316	67.8509	70.5101	72.9227	75.1166	77.1163	78.9427	80.6145	82.1475	83.5561	84.8527	86.0483	87.1526	88.1745
317	68.6212	71.2297	73.5942	75.7427	77.6994	79.4853	81.1188	82.6157	83.9903	85.2548	86.4202	87.4962	88.4914
318	69.3697	71.9279	74.2449	76.3486	78.2631	80.0092	81.6052	83.0668	84.4081	85.6414	86.7775	87.8259	88.7952
319	70.0966	72.6052	74.8754	76.9351	78.808	80.515	82.0742	83.5014	84.8103	86.0132	87.1207	88.1423	89.0865
320	70.8026	73.2622	75.4862	77.5025	79.3346	81.0034	82.5267	83.9201	85.1974	86.3706	87.4504	88.4461	89.366
321	71.4881	73.8993	76.0779	78.0515	79.8436	81.4749	82.963	84.3235	85.57	86.7144	87.7673	88.7378	89.6342
322	72.1536	74.5171	76.651	78.5826	80.3355	81.9301	83.3838	84.7122	85.9287	87.0451	88.0718	89.018	89.8916
323	72.7996	75.1161	77.206	79.0965	80.811	82.3695	83.7898	85.0869	86.2742	87.3633	88.3647	89.2871	90.1387
324	73.4266	75.6968	77.7435	79.5937	81.2704	82.7939	84.1814	85.448	86.6068	87.6696	88.6463	89.5459	90.3762
325	74.0352	76.2599	78.2641	80.0747	81.7146	83.2037	84.5592	85.7961	86.9273	87.9644	88.9172	89.7946	90.6043
326	74.6258	76.8057	78.7682	80.54	82.1438	83.5994	84.9238	86.1317	87.2361	88.2482	89.1779	90.0339	90.8237
327	75.199	77.3349	79.2565	80.9903	82.5588	83.9817	85.2757	86.4554	87.5337	88.5216	89.4289	90.2641	91.0347
328	75.7553	77.8479	79.7294	81.426	82.96	84.3509	85.6153	86.7677	87.8206	88.785	89.6706	90.4857	91.2377
329	76.2951	78.3453	80.1875	81.8476	83.348	84.7077	85.9433	87.069	88.0972	89.0389	89.9034	90.6991	91.4331
330	76.819	78.8275	80.6312	82.2557	83.7231	85.0525	86.26	87.3597	88.3641	89.2837	90.1278	90.9047	91.6213
331	77.3274	79.2951	81.061	82.6507	84.086	85.3857	86.5659	87.6405	88.6216	89.5198	90.3442	91.1029	91.8027
332	77.8209	79.7485	81.4775	83.0331	84.4371	85.7079	86.8614	87.9116	88.8701	89.7476	90.5529	91.2939	91.9776
333	78.2998	80.1881	81.881	83.4034	84.7767	86.0194	87.1471	88.1734	89.1101	89.9674	90.7543	91.4783	92.1463
334	78.7648	80.6146	82.272	83.762	85.1054	86.3207	87.4232	88.4264	89.3419	90.1797	90.9487	91.6562	92.3091
335	79.2161	81.0282	82.6511	84.1093	85.4236	86.6122	87.6902	88.671	89.5659	90.3848	91.1364	91.828	92.4663
336	79.6542	81.4294	83.0185	84.4457	85.7317	86.8943	87.9485	88.9075	89.7824	90.583	91.3178	91.994	92.6181
337	80.0797	81.8187	83.3747	84.7717	86.03	87.1673	88.1984	89.1362	89.9917	90.7746	91.4931	92.1545	92.7649
338	80.4928	82.1965	83.7202	85.0876	86.319	87.4316	88.4403	89.3575	90.1942	90.9599	91.6627	92.3096	92.9068
339	80.894	82.5631	84.0552	85.3939	86.599	87.6876	88.6744	89.5717	90.3902	91.1392	91.8267	92.4597	93.0441
340	81.2836	82.9189	84.3802	85.6908	86.8703	87.9357	88.9012	89.779	90.5798	91.3127	91.9855	92.605	93.177
341	81.6622	83.2644	84.6956	85.9787	87.1333	88.176	89.1209	89.9799	90.7636	91.4808	92.1393	92.7457	93.3058
342	82.0299	83.5998	85.0016	86.258	87.3884	88.409	89.3337	90.1745	90.9415	91.6436	92.2882	92.882	93.4305
343	82.3873	83.9255	85.2986	86.529	87.6357	88.6348	89.5401	90.3632	91.114	91.8014	92.4326	93.0141	93.5514
344	82.7346	84.2419	85.587	86.792	87.8757	88.8539	89.7403	90.5461	91.2813	91.9544	92.5726	93.1422	93.6687
345	83.0722	84.5493	85.867	87.0473	88.1086	89.0665	89.9344	90.7235	91.4435	92.1028	92.7084	93.2665	93.7825
346	83.4004	84.848	86.139	87.2952	88.3346	89.2728	90.1228	90.8957	91.6009	92.2468	92.8402	93.3872	93.893
347	83.7195	85.1382	86.4033	87.536	88.5541	89.4731	90.3057	91.0628	91.7537	92.3866	92.9682	93.5044	94.0003
348	84.0298	85.4204	86.6601	87.7698	88.7673	89.6676	90.4833	91.2251	91.9021	92.5224	93.0925	93.6182	94.1046
349	84.3317	85.6948	86.9097	87.9971	88.9745	89.8565	90.6558	91.3827	92.0463	92.6543	93.2133	93.7289	94.206
350	84.6253	85.9616	87.1523	88.218	89.1758	90.0402	90.8235	91.5359	92.1864	92.7825	93.3307	93.8365	94.3046
351	84.9111	86.2212	87.3883	88.4328	89.3714	90.2186	90.9864	91.6849	92.3226	92.9072	93.445	93.9412	94.4006
352	85.1892	86.4737	87.6179	88.6417	89.5617	90.3922	91.1449	91.8297	92.4551	93.0285	93.5561	94.043	94.494
353	85.46	86.7194	87.8412	88.8449	89.7468	90.561	91.2991	91.9706	92.584	93.1466	93.6643	94.1422	94.585
354	85.7236	86.9586	88.0585	89.0426	89.927	90.7253	91.4491	92.1077	92.7095	93.2615	93.7696	94.2389	94.6736
355	85.9803	87.1915	88.2701	89.2351	90.1023	90.8852	91.5951	92.2412	92.8317	93.3734	93.8723	94.333	94.76
356	86.2303	87.4183	88.4761	89.4224	90.2729	91.0409	91.7373	92.3713	92.9507	93.4825	93.9723	94.4248	94.8443
357	86.4739	87.6392	88.6767	89.6049	90.4392	91.1925	91.8758	92.498	93.0667	93.5888	94.0698	94.5143	94.9264
358	86.7113	87.8544	88.8721	89.7827	90.6011	91.3403	92.0108	92.6214	93.1798	93.6925	94.1649	94.6016	95.0066
359	86.9427	88.0641	89.0626	89.9559	90.7589	91.4842	92.1423	92.7418	93.29	93.7936	94.2577	94.6868	95.0849
360	87.1682	88.2686	89.2482	90.1248	90.9127	91.6246	92.2706	92.8592	93.3976	93.8922	94.3483	94.77	95.1614
361	87.3882	88.4679	89.4292	90.2894	91.0627	91.7615	92.3957	92.9737	93.5026	93.9885	94.4367	94.8513	95.2361
362	87.6027	88.6623	89.6057	90.4499	91.209	91.895	92.5178	93.0855	93.605	94.0825	94.5231	94.9307	95.3091
363	87.8119	88.8519	89.7779	90.6066	91.3518	92.0253	92.637	93.1946	93.7051	94.1744	94.6074	95.0083	95.3805
364	88.0161	89.037	89.9459	90.7594	91.4911	92.1525	92.7533	93.3012	93.8028	94.2641	94.6899	95.0841	95.4503
365	88.2154	89.2175	90.1098	90.9086	91.627	92.2767	92.8669	93.4053	93.8983	94.3518	94.7706	95.1583	95.5186
366	88.4099	89.3938	90.2699	91.0542	91.7598	92.398	92.9779	93.507	93.9917	94.4376	94.8494	95.2309	95.5854
367	88.5998	89.5659	90.4262	91.1965	91.8895	92.5165	93.0864	93.6064	94.0829	94.5215	94.9266	95.3019	95.6508
368	88.7853	89.734	90.5789	91.3354	92.0163	92.6324	93.1924	93.7037	94.1722	94.6036	95.0021	95.3714	95.7148
369	88.9665	89.8982	90.728	91.4712	92.1402	92.7456	93.2961	93.7988	94.2596	94.6839	95.0761	95.4395	95.7776
370	89.1435	90.0586	90.8738	91.6039	92.2612	92.8563	93.3976	93.8918	94.345	94.7625	95.1484	95.5062	95.839
371	89.3166	90.2154	91.0162	91.7337	92.3797	92.9646	93.4968	93.9829	94.4287	94.8395	95.2194	95.5716	95.8993
372	89.4857	90.3687	91.1555	91.8605	92.4955	93.0706	93.5939	94.072	94.5107	94.9149	95.2888	95.6356	95.9583
373	89.651	90.5186	91.2918	91.9847	92.6088	93.1743	93.689	94.1593	94.5909	94.9888	95.3569	95.6984	96.0162
374	89.8127	90.6652	91.425	92.1061	92.7197	93.2758	93.7821	94.2448	94.6696	95.0612	95.4237	95.7599	96.073
375	89.9709	90.8087	91.5554	92.225	92.8283	93.3752	93.8732	94.3286	94.7466	95.1322	95.4891	95.8203	96.1288
376	90.1256	90.949	91.6831	92.3413	92.9346	93.4725	93.9626	94.4107	94.8222	95.2018	95.5533	95.8796	96.1834
377	90.2771	91.0864	91.808	92.4552	93.0388	93.5679	94.0501	94.4912	94.8963	95.2701	95.6163	95.9377	96.2371
378	90.4253	91.2208	91.9303	92.5668	93.1408	93.6614	94.1359	94.5701	94.969	95.3371	95.6781	95.9948	96.2898
379	90.5704	91.3525	92.0502	92.6761	93.2407	93.753	94.2201	94.6475	95.0402	95.4028	95.7388	96.0508	96.3416
380	90.7125	91.4815	92.1675	92.7833	93.3387	93.8429	94.3026	94.7234	95.1102	95.4674	95.7984	96.1058	96.3924
381	90.8517	91.6078	92.2825	92.8882	93.4348	93.931	94.3836	94.7979	95.1789	95.5307	95.8569	96.1599	96.4423
382	90.988	91.7316	92.3953	92.9912	93.529	94.0174	94.463	94.8711	95.2463	95.5929	95.9143	96.213	96.4914
383	91.1216	91.8529	92.5058	93.0921	93.6214	94.1022	94.541	94.9429	95.3125	95.654	95.9708	96.2652	96.5396
384	91.2525	91.9718	92.6141	93.1911	93.7121	94.1854	94.6175	95.0134	95.3775	95.7141	96.0263	96.3164	96.5871
385	91.3808	92.0885	92.7204	93.2882	93.801	94.2671	94.6926	95.0826	95.4414	95.7731	96.0808	96.3669	96.6337
386	91.5067	92.2028	92.8247	93.3835	93.8884	94.3473	94.7665	95.1506	95.5041	95.831	96.1344	96.4164	96.6795
387	91.6301	92.315	92.927	93.4771	93.9741	94.426	94.8389	95.2175	95.5658	95.888	96.1871	96.4652	96.7247
388	91.7511	92.4251	93.0273	93.5689	94.0583	94.5034	94.9102	95.2831	95.6265	95.9441	96.239	96.5131	96.769
389	91.8699	92.5331	93.1259	93.659	94.1409	94.5794	94.9802	95.3477	95.6861	95.9992	96.2899	96.5603	96.8127
390	91.9864	92.6391	93.2226	93.7476	94.2222	94.6541	95.049	95.4112	95.7447	96.0534	96.3401	96.6068	96.8557
391	92.1008	92.7432	93.3176	93.8345	94.302	94.7275	95.1166	95.4736	95.8024	96.1068	96.3895	96.6525	96.898
392	92.213	92.8453	93.411	93.92	94.3804	94.7996	95.1831	95.535	95.8591	96.1592	96.4381	96.6975	96.9396
393	92.3232	92.9457	93.5026	94.004	94.4575	94.8706	95.2486	95.5954	95.9149	96.2109	96.4859	96.7417	96.9807
394	92.4315	93.0443	93.5927	94.0865	94.5333	94.9403	95.3129	95.6548	95.9699	96.2617	96.533	96.7853	97.021
395	92.5378	93.1412	93.6812	94.1676	94.6078	95.009	95.3762	95.7133	96.024	96.3118	96.5793	96.8283	97.0608
396	92.6422	93.2363	93.7682	94.2474	94.6811	95.0765	95.4385	95.7709	96.0772	96.3611	96.625	96.8706	97.1
397	92.7449	93.3299	93.8538	94.3259	94.7533	95.1429	95.4998	95.8276	96.1296	96.4096	96.67	96.9123	97.1386
398	92.8457	93.4219	93.9379	94.403	94.8242	95.2083	95.5602	95.8833	96.1812	96.4574	96.7143	96.9533	97.1767
399	92.9448	93.5123	94.0207	94.4789	94.894	95.2726	95.6196	95.9383	96.2321	96.5045	96.7579	96.9938	97.2142
400	93.0423	93.6012	94.102	94.5536	94.9627	95.336	95.6781	95.9924	96.2822	96.5509	96.801	97.0337	97.2512
401	93.1381	93.6886	94.1821	94.6272	95.0304	95.3984	95.7358	96.0457	96.3315	96.5967	96.8434	97.073	97.2876
402	93.2324	93.7747	94.2609	94.6995	95.097	95.4598	95.7925	96.0982	96.3802	96.6417	96.8852	97.1118	97.3236
403	93.325	93.8593	94.3384	94.7708	95.1626	95.5203	95.8485	96.15	96.4281	96.6862	96.9264	97.15	97.359
404	93.4162	93.9426	94.4148	94.8409	95.2272	95.5799	95.9036	96.201	96.4753	96.73	96.967	97.1877	97.394
405	93.506	94.0246	94.4899	94.91	95.2908	95.6386	95.9579	96.2513	96.5219	96.7731	97.0071	97.2248	97.4284
406	93.5943	94.1053	94.5639	94.978	95.3535	95.6965	96.0114	96.3008	96.5678	96.8157	97.0466	97.2615	97.4625
407	93.6812	94.1848	94.6368	95.045	95.4152	95.7535	96.0642	96.3497	96.6131	96.8577	97.0856	97.2977	97.496
408	93.7667	94.263	94.7086	95.111	95.4761	95.8098	96.1162	96.3979	96.6578	96.8992	97.124	97.3334	97.5291
409	93.8509	94.3401	94.7793	95.1761	95.536	95.8652	96.1675	96.4454	96.7018	96.94	97.1619	97.3686	97.5618
410	93.9339	94.416	94.8489	95.2402	95.5952	95.9198	96.2181	96.4923	96.7453	96.9803	97.1994	97.4033	97.594
411	94.0156	94.4907	94.9176	95.3034	95.6535	95.9737	96.2679	96.5385	96.7881	97.0201	97.2363	97.4376	97.6259
412	94.096	94.5644	94.9852	95.3657	95.7109	96.0268	96.3171	96.5841	96.8304	97.0594	97.2728	97.4715	97.6573
413	94.1753	94.637	95.0519	95.4271	95.7676	96.0792	96.3657	96.6291	96.8722	97.0981	97.3088	97.5049	97.6883
414	94.2534	94.7085	95.1177	95.4877	95.8235	96.1309	96.4136	96.6735	96.9134	97.1364	97.3443	97.5379	97.7189
415	94.3303	94.7791	95.1825	95.5474	95.8787	96.1819	96.4608	96.7173	96.954	97.1741	97.3794	97.5704	97.7492
416	94.4062	94.8486	95.2464	95.6063	95.9331	96.2323	96.5075	96.7606	96.9942	97.2114	97.414	97.6026	97.779
417	94.4809	94.9171	95.3094	95.6644	95.9867	96.2819	96.5535	96.8033	97.0338	97.2482	97.4482	97.6344	97.8085
418	94.5546	94.9847	95.3716	95.7218	96.0397	96.331	96.599	96.8455	97.0729	97.2846	97.482	97.6657	97.8377
419	94.6273	95.0514	95.433	95.7783	96.0919	96.3793	96.6438	96.8871	97.1116	97.3205	97.5153	97.6967	97.8664
420	94.699	95.1171	95.4935	95.8341	96.1435	96.4271	96.6881	96.9282	97.1497	97.3559	97.5483	97.7273	97.8949
421	94.7696	95.182	95.5532	95.8892	96.1944	96.4742	96.7319	96.9688	97.1874	97.3909	97.5808	97.7576	97.923
422	94.8393	95.246	95.6121	95.9436	96.2447	96.5208	96.775	97.0089	97.2247	97.4255	97.613	97.7875	97.9507
423	94.9081	95.3091	95.6702	95.9973	96.2943	96.5668	96.8177	97.0485	97.2614	97.4597	97.6448	97.817	97.9782
424	94.9759	95.3714	95.7276	96.0503	96.3433	96.6122	96.8598	97.0876	97.2978	97.4934	97.6762	97.8462	98.0053
425	95.0428	95.4329	95.7843	96.1026	96.3917	96.657	96.9014	97.1262	97.3337	97.5268	97.7072	97.875	98.0321
426	95.1089	95.4936	95.8402	96.1543	96.4395	96.7013	96.9426	97.1644	97.3691	97.5598	97.7379	97.9035	98.0586
427	95.1741	95.5535	95.8954	96.2053	96.4867	96.7451	96.9832	97.2021	97.4042	97.5924	97.7682	97.9317	98.0847
428	95.2384	95.6127	95.95	96.2557	96.5334	96.7883	97.0233	97.2394	97.4388	97.6246	97.7981	97.9596	98.1106
429	95.3019	95.6711	96.0038	96.3054	96.5794	96.831	97.063	97.2763	97.4731	97.6564	97.8277	97.9871	98.1362
430	95.3646	95.7288	96.057	96.3546	96.6249	96.8732	97.1022	97.3127	97.5069	97.6879	97.857	98.0143	98.1615
431	95.4265	95.7857	96.1096	96.4032	96.6699	96.9149	97.1409	97.3487	97.5404	97.719	97.886	98.0412	98.1865
432	95.4877	95.842	96.1615	96.4512	96.7144	96.9562	97.1792	97.3843	97.5734	97.7498	97.9146	98.0678	98.2113
433	95.548	95.8976	96.2128	96.4986	96.7583	96.9969	97.2171	97.4195	97.6061	97.7802	97.9429	98.0942	98.2357
434	95.6077	95.9525	96.2634	96.5455	96.8017	97.0372	97.2545	97.4543	97.6385	97.8103	97.9709	98.1202	98.2599
435	95.6666	96.0067	96.3135	96.5918	96.8446	97.077	97.2915	97.4887	97.6704	97.84	97.9986	98.146	98.2839
436	95.7247	96.0603	96.363	96.6376	96.887	97.1163	97.3281	97.5227	97.7021	97.8694	98.026	98.1714	98.3075
437	95.7822	96.1132	96.4119	96.6828	96.9289	97.1553	97.3643	97.5563	97.7333	97.8985	98.053	98.1966	98.331
438	95.839	96.1656	96.4602	96.7276	96.9704	97.1938	97.4	97.5896	97.7643	97.9273	98.0798	98.2215	98.3541
439	95.8951	96.2173	96.508	96.7718	97.0114	97.2318	97.4354	97.6225	97.7949	97.9558	98.1063	98.2462	98.3771
440	95.9506	96.2684	96.5552	96.8155	97.0519	97.2694	97.4704	97.655	97.8251	97.9839	98.1326	98.2706	98.3998
441	96.0054	96.3189	96.6019	96.8588	97.092	97.3067	97.505	97.6872	97.8551	98.0118	98.1585	98.2947	98.4222
442	96.0595	96.3689	96.6481	96.9016	97.1316	97.3435	97.5393	97.7191	97.8847	98.0394	98.1842	98.3186	98.4444
443	96.1131	96.4183	96.6938	96.9438	97.1708	97.3799	97.5731	97.7506	97.914	98.0667	98.2096	98.3422	98.4664
444	96.166	96.4671	96.7389	96.9857	97.2096	97.4159	97.6067	97.7817	97.943	98.0937	98.2347	98.3656	98.4881
445	96.2184	96.5154	96.7836	97.027	97.248	97.4516	97.6398	97.8126	97.9717	98.1204	98.2596	98.3888	98.5097
446	96.2701	96.5631	96.8277	97.068	97.2859	97.4868	97.6726	97.8431	98.0001	98.1468	98.2842	98.4117	98.531
447	96.3213	96.6103	96.8714	97.1084	97.3235	97.5217	97.7051	97.8733	98.0282	98.173	98.3086	98.4344	98.5521
448	96.3719	96.6571	96.9146	97.1485	97.3606	97.5562	97.7372	97.9032	98.056	98.1989	98.3327	98.4568	98.573
449	96.4219	96.7032	96.9574	97.1881	97.3974	97.5904	97.769	97.9328	98.0835	98.2245	98.3566	98.479	98.5936
450	96.4714	96.7489	96.9996	97.2273	97.4338	97.6242	97.8005	97.9621	98.1107	98.2499	98.3802	98.501	98.6141
451	96.5203	96.7941	97.0415	97.2661	97.4698	97.6576	97.8316	97.9911	98.1377	98.275	98.4036	98.5228	98.6343
452	96.5687	96.8389	97.0829	97.3045	97.5054	97.6907	97.8624	98.0198	98.1644	98.2999	98.4268	98.5444	98.6544
453	96.6166	96.8831	97.1238	97.3425	97.5406	97.7235	97.8929	98.0482	98.1908	98.3245	98.4497	98.5657	98.6743
454	96.664	96.9269	97.1644	97.3801	97.5755	97.756	97.9232	98.0763	98.217	98.3489	98.4724	98.5869	98.6939
455	96.7109	96.9702	97.2045	97.4173	97.6101	97.7881	97.9531	98.1041	98.2429	98.3731	98.4949	98.6078	98.7134
456	96.7573	97.0131	97.2442	97.4541	97.6443	97.8199	97.9827	98.1317	98.2686	98.397	98.5172	98.6285	98.7327
457	96.8032	97.0555	97.2835	97.4906	97.6781	97.8513	98.012	98.159	98.294	98.4206	98.5392	98.649	98.7518
458	96.8486	97.0975	97.3224	97.5267	97.7116	97.8825	98.041	98.186	98.3191	98.4441	98.5611	98.6694	98.7707
459	96.8935	97.1391	97.3609	97.5624	97.7448	97.9133	98.0697	98.2128	98.344	98.4673	98.5827	98.6895	98.7895
460	96.938	97.1802	97.399	97.5978	97.7776	97.9439	98.0982	98.2393	98.3687	98.4903	98.6041	98.7095	98.808
461	96.9821	97.2209	97.4368	97.6328	97.8101	97.9741	98.1264	98.2655	98.3931	98.5131	98.6254	98.7292	98.8264
462	97.0256	97.2612	97.4741	97.6675	97.8423	98.0041	98.1543	98.2915	98.4173	98.5356	98.6464	98.7488	98.8446
463	97.0688	97.3011	97.5111	97.7018	97.8742	98.0338	98.1819	98.3173	98.4413	98.558	98.6672	98.7682	98.8626
464	97.1115	97.3407	97.5477	97.7358	97.9058	98.0632	98.2093	98.3428	98.465	98.5801	98.6878	98.7874	98.8805
465	97.1538	97.3798	97.584	97.7695	97.9371	98.0922	98.2364	98.368	98.4885	98.6021	98.7083	98.8064	98.8982
466	97.1956	97.4185	97.6199	97.8028	97.9681	98.1211	98.2633	98.3931	98.5118	98.6238	98.7285	98.8252	98.9158
467	97.2371	97.4569	97.6555	97.8359	97.9987	98.1496	98.2899	98.4178	98.5349	98.6453	98.7486	98.8439	98.9331
468	97.2781	97.4948	97.6907	97.8686	98.0291	98.1779	98.3163	98.4424	98.5577	98.6667	98.7685	98.8624	98.9504
469	97.3187	97.5325	97.7256	97.901	98.0592	98.2059	98.3424	98.4667	98.5804	98.6878	98.7881	98.8807	98.9674
470	97.359	97.5697	97.7601	97.9331	98.089	98.2336	98.3682	98.4908	98.6028	98.7088	98.8077	98.8989	98.9843
471	97.3988	97.6066	97.7944	97.9649	98.1186	98.2611	98.3939	98.5147	98.6251	98.7295	98.827	98.9169	99.0011
472	97.4383	97.6432	97.8283	97.9964	98.1478	98.2884	98.4193	98.5384	98.6471	98.7501	98.8462	98.9347	99.0177
473	97.4774	97.6793	97.8618	98.0276	98.1768	98.3154	98.4444	98.5618	98.6689	98.7705	98.8652	98.9524	99.0341
474	97.5161	97.7152	97.8951	98.0585	98.2055	98.3421	98.4693	98.585	98.6905	98.7907	98.884	98.9699	99.0504
475	97.5544	97.7507	97.9281	98.0891	98.234	98.3686	98.4941	98.6081	98.712	98.8107	98.9026	98.9873	99.0666
476	97.5924	97.7859	97.9607	98.1194	98.2622	98.3948	98.5185	98.6309	98.7332	98.8305	98.9211	99.0045	99.0826
477	97.63	97.8208	97.9931	98.1495	98.2901	98.4208	98.5428	98.6535	98.7542	98.8502	98.9395	99.0215	99.0985
478	97.6673	97.8553	98.0251	98.1793	98.3178	98.4466	98.5668	98.6759	98.7751	98.8697	98.9576	99.0384	99.1142
479	97.7042	97.8895	98.0569	98.2088	98.3452	98.4721	98.5906	98.6981	98.7958	98.889	98.9756	99.0552	99.1298
480	97.7408	97.9234	98.0883	98.238	98.3724	98.4974	98.6143	98.7201	98.8163	98.9082	98.9935	99.0718	99.1453

## Sheet: Q-variiert
t[s]	QSrc=-9	QSrc=-8.75	QSrc=-8.5	QSrc=-8.25	QSrc=-8	QSrc=-7.75	QSrc=-7.5	QSrc=-7.25	QSrc=-7	QSrc=-6.75	QSrc=-6.5	QSrc=-6.25	QSrc=-6
1	100	100	100	100	100	100	100	100	100	100	100	100	100
2	100.002	100.002	100.002	100.002	100.002	100.002	100.002	100.002	100.002	100.002	100.002	100.002	100.001
3	100.008	100.008	100.007	100.007	100.007	100.007	100.006	100.006	100.006	100.006	100.005	100.005	100.005
4	100.015	100.014	100.014	100.013	100.013	100.013	100.012	100.012	100.011	100.011	100.01	100.01	100.009
5	100.022	100.021	100.021	100.02	100.02	100.019	100.019	100.018	100.017	100.017	100.016	100.015	100.015
6	100.028	100.028	100.027	100.027	100.026	100.025	100.025	100.024	100.023	100.023	100.022	100.021	100.02
7	100.034	100.034	100.033	100.032	100.032	100.031	100.031	100.03	100.029	100.028	100.028	100.027	100.026
8	100.039	100.039	100.038	100.037	100.037	100.036	100.036	100.035	100.034	100.034	100.033	100.032	100.031
9	100.043	100.043	100.042	100.042	100.041	100.041	100.04	100.04	100.039	100.038	100.037	100.037	100.036
10	100.047	100.046	100.046	100.046	100.045	100.045	100.044	100.044	100.043	100.042	100.042	100.041	100.04
11	100.05	100.05	100.049	100.049	100.048	100.048	100.048	100.047	100.046	100.046	100.045	100.044	100.044
12	100.053	100.053	100.052	100.052	100.052	100.051	100.051	100.05	100.05	100.049	100.048	100.048	100.047
13	100.056	100.056	100.055	100.055	100.054	100.054	100.053	100.053	100.052	100.052	100.051	100.051	100.05
14	100.059	100.058	100.058	100.057	100.057	100.057	100.056	100.056	100.055	100.055	100.054	100.053	100.053
15	100.061	100.061	100.06	100.06	100.059	100.059	100.059	100.058	100.057	100.057	100.056	100.056	100.055
16	100.064	100.063	100.063	100.062	100.062	100.061	100.061	100.06	100.06	100.059	100.059	100.058	100.057
17	100.066	100.065	100.065	100.065	100.064	100.064	100.063	100.062	100.062	100.061	100.061	100.06	100.06
18	100.068	100.068	100.067	100.067	100.066	100.066	100.065	100.065	100.064	100.063	100.063	100.062	100.062
19	100.07	100.069	100.069	100.069	100.068	100.068	100.067	100.066	100.066	100.065	100.065	100.064	100.064
20	100.072	100.071	100.071	100.07	100.07	100.069	100.069	100.068	100.068	100.067	100.067	100.066	100.065
21	100.073	100.073	100.072	100.072	100.072	100.071	100.071	100.07	100.069	100.069	100.068	100.068	100.067
22	100.074	100.073	100.073	100.073	100.072	100.072	100.071	100.071	100.071	100.07	100.069	100.069	100.068
23	100.058	100.059	100.06	100.061	100.061	100.062	100.063	100.063	100.064	100.064	100.064	100.064	100.065
24	99.9812	99.9869	99.993	99.9985	100.004	100.009	100.014	100.019	100.023	100.027	100.031	100.035	100.039
25	99.7849	99.8012	99.818	99.8341	99.8499	99.8654	99.8804	99.895	99.9092	99.9228	99.9359	99.9485	99.9604
26	99.4298	99.4621	99.4949	99.5273	99.5594	99.5912	99.6225	99.6535	99.6839	99.7137	99.7427	99.771	99.7984
27	98.9093	98.9603	99.0123	99.0643	99.1166	99.1691	99.2215	99.2738	99.3259	99.3777	99.4288	99.4792	99.5288
28	98.2433	98.3129	98.3843	98.4567	98.5302	98.6047	98.6801	98.7563	98.8331	98.9102	98.9874	99.0645	99.1413
29	97.4652	97.5512	97.64	97.7309	97.8242	97.9198	98.0174	98.1172	98.2187	98.3219	98.4265	98.5322	98.6387
30	96.6098	96.7092	96.8124	96.9189	97.029	97.1428	97.2601	97.381	97.5053	97.633	97.7638	97.8973	98.0335
31	95.7069	95.8168	95.9313	96.0502	96.1739	96.3024	96.4359	96.5746	96.7184	96.8674	97.0214	97.1803	97.3439
32	94.7784	94.8966	95.0201	95.1488	95.283	95.4232	95.5696	95.7224	95.882	96.0485	96.222	96.4026	96.5902
33	93.839	93.9644	94.0953	94.2319	94.3746	94.5239	94.6804	94.8443	95.0163	95.1967	95.3859	95.5842	95.7918
34	92.8982	93.0301	93.1677	93.3111	93.461	93.6179	93.7825	93.9553	94.137	94.3284	94.5299	94.7422	94.9659
35	91.9617	92.0999	92.2439	92.3937	92.5502	92.7138	92.8854	93.0656	93.2553	93.4553	93.6665	93.8898	94.1261
36	91.0332	91.1778	91.3281	91.4843	91.647	91.8171	91.9951	92.1819	92.3784	92.5857	92.8048	93.0369	93.2832
37	90.1156	90.2664	90.423	90.5855	90.7546	90.9309	91.1152	91.3083	91.5112	91.725	91.9509	92.1903	92.4446
38	89.2111	89.368	89.5308	89.6995	89.8749	90.0575	90.248	90.4473	90.6564	90.8764	91.1086	91.3544	91.6155
39	88.3217	88.4844	88.653	88.8278	89.0094	89.1981	89.3949	89.6005	89.8157	90.0418	90.28	90.5319	90.7991
40	87.4493	87.6173	87.7914	87.9719	88.1593	88.3541	88.557	88.7687	88.9901	89.2223	89.4665	89.7243	89.9974
41	86.5953	86.7681	86.9473	87.133	87.3259	87.5264	87.7351	87.9528	88.1803	88.4185	88.6688	88.9325	89.2113
42	85.7611	85.9382	86.1218	86.3123	86.5102	86.7159	86.9302	87.1535	87.3868	87.631	87.8872	88.1568	88.4415
43	84.9477	85.1285	85.316	85.5108	85.7131	85.9236	86.1428	86.3714	86.6102	86.8601	87.1221	87.3976	87.688
44	84.1557	84.3397	84.5307	84.729	84.9353	85.15	85.3737	85.6072	85.851	86.1062	86.3738	86.6549	86.951
45	83.3856	83.5723	83.7662	83.9677	84.1774	84.3958	84.6235	84.8612	85.1096	85.3697	85.6424	85.9289	86.2306
46	82.6376	82.8265	83.023	83.2272	83.4398	83.6613	83.8925	84.1339	84.3864	84.6509	84.9283	85.2198	85.5267
47	81.9117	82.1026	82.3011	82.5076	82.7226	82.9468	83.1809	83.4256	83.6817	83.95	84.2316	84.5276	84.8394
48	81.2079	81.4003	81.6005	81.8089	82.026	82.2524	82.489	82.7364	82.9955	83.2672	83.5525	83.8526	84.1688
49	80.526	80.7196	80.9212	81.131	81.3498	81.5781	81.8167	82.0664	82.3281	82.6026	82.8911	83.1948	83.5149
50	79.8656	80.0602	80.2628	80.4738	80.6938	80.9237	81.164	81.4155	81.6793	81.9563	82.2475	82.5542	82.8778
51	79.2265	79.4217	79.625	79.8369	80.0579	80.2889	80.5305	80.7836	81.0491	81.328	81.6215	81.9308	82.2573
52	78.6082	78.8037	79.0075	79.2199	79.4417	79.6735	79.9162	80.1704	80.4373	80.7178	81.0131	81.3245	81.6535
53	78.0103	78.2059	78.4099	78.6226	78.8449	79.0772	79.3205	79.5757	79.8435	80.1252	80.422	80.7352	81.0662
54	77.4322	77.6277	77.8316	78.0445	78.2669	78.4996	78.7433	78.999	79.2676	79.5502	79.8481	80.1626	80.4952
55	76.8734	77.0686	77.2724	77.4851	77.7074	77.9402	78.1841	78.4401	78.7091	78.9923	79.291	79.6065	79.9404
56	76.3334	76.5282	76.7315	76.9439	77.166	77.3986	77.6424	77.8985	78.1677	78.4512	78.7504	79.0666	79.4014
57	75.8117	76.0058	76.2085	76.4204	76.6421	76.8743	77.1179	77.3738	77.643	77.9266	78.226	78.5426	78.878
58	75.3077	75.501	75.703	75.9142	76.1352	76.3669	76.6101	76.8656	77.1345	77.418	77.7174	78.0341	78.3698
59	74.8208	75.0132	75.2143	75.4246	75.6449	75.8759	76.1184	76.3734	76.6419	76.9251	77.2242	77.5408	77.8766
60	74.3505	74.5418	74.7419	74.9513	75.1707	75.4008	75.6426	75.8968	76.1647	76.4473	76.746	77.0623	77.398
61	73.8962	74.0864	74.2854	74.4937	74.712	74.9412	75.182	75.4354	75.7025	75.9844	76.2825	76.5983	76.9335
62	73.4573	73.6463	73.844	74.0512	74.2684	74.4965	74.7362	74.9886	75.2548	75.5358	75.8331	76.1483	76.4829
63	73.0333	73.221	73.4175	73.6234	73.8393	74.0662	74.3048	74.5561	74.8211	75.1012	75.3976	75.7119	76.0458
64	72.6236	72.81	73.0051	73.2097	73.4244	73.6499	73.8872	74.1373	74.4012	74.6801	74.9754	75.2887	75.6218
65	72.2278	72.4128	72.6065	72.8097	73.023	73.2471	73.4831	73.7319	73.9945	74.2721	74.5663	74.8785	75.2104
66	71.8454	72.0289	72.2211	72.4228	72.6347	72.8574	73.092	73.3393	73.6005	73.8769	74.1697	74.4806	74.8114
67	71.4757	71.6577	71.8485	72.0487	72.259	72.4803	72.7134	72.9592	73.219	73.4939	73.7854	74.0949	74.4244
68	71.1184	71.2989	71.4881	71.6868	71.8956	72.1153	72.3469	72.5912	72.8494	73.1228	73.4128	73.7209	74.049
69	70.7729	70.9519	71.1396	71.3367	71.5439	71.7621	71.992	72.2348	72.4914	72.7633	73.0517	73.3583	73.6849
70	70.4388	70.6163	70.8024	70.9979	71.2036	71.4201	71.6485	71.8896	72.1446	72.4148	72.7016	73.0066	73.3316
71	70.1157	70.2916	70.4762	70.6701	70.8741	71.089	71.3157	71.5552	71.8086	72.0771	72.3622	72.6655	72.9889
72	69.8031	69.9775	70.1605	70.3528	70.5552	70.7685	70.9935	71.2313	71.4829	71.7497	72.0331	72.3347	72.6564
73	69.5007	69.6734	69.8549	70.0456	70.2464	70.458	70.6813	70.9174	71.1673	71.4324	71.714	72.0139	72.3337
74	69.2079	69.3791	69.559	69.7481	69.9473	70.1572	70.3789	70.6132	70.8614	71.1247	71.4046	71.7026	72.0207
75	68.9245	69.0942	69.2725	69.46	69.6575	69.8658	70.0858	70.3184	70.5649	70.8264	71.1044	71.4006	71.7168
76	68.65	68.8182	68.995	69.1809	69.3768	69.5834	69.8017	70.0326	70.2773	70.537	70.8133	71.1076	71.422
77	68.3842	68.5509	68.7261	68.9105	69.1047	69.3097	69.5263	69.7555	69.9984	70.2564	70.5308	70.8232	71.1357
78	68.1266	68.2918	68.4655	68.6483	68.841	69.0444	69.2593	69.4867	69.7279	69.9841	70.2566	70.5472	70.8578
79	67.8769	68.0407	68.2129	68.3942	68.5853	68.787	69.0003	69.2261	69.4655	69.7198	69.9905	70.2793	70.5879
80	67.6349	67.7972	67.968	68.1477	68.3373	68.5374	68.749	68.9731	69.2108	69.4634	69.7323	70.0191	70.3258
81	67.4002	67.5611	67.7304	67.9087	68.0967	68.2953	68.5053	68.7277	68.9636	69.2144	69.4815	69.7665	70.0712
82	67.1725	67.332	67.4999	67.6767	67.8633	68.0603	68.2686	68.4894	68.7237	68.9727	69.238	69.5211	69.8239
83	66.9515	67.1097	67.2762	67.4516	67.6367	67.8321	68.039	68.2581	68.4907	68.738	69.0014	69.2827	69.5836
84	66.7371	66.894	67.0591	67.2331	67.4167	67.6106	67.8159	68.0334	68.2644	68.5099	68.7716	69.051	69.3501
85	66.5288	66.6844	66.8482	67.0208	67.203	67.3955	67.5993	67.8152	68.0445	68.2884	68.5483	68.8259	69.123
86	66.3266	66.4809	66.6434	66.8147	66.9955	67.1865	67.3888	67.6032	67.8309	68.0731	68.3313	68.6071	68.9023
87	66.13	66.2832	66.4444	66.6144	66.7938	66.9834	67.1842	67.3971	67.6232	67.8638	68.1203	68.3943	68.6877
88	65.939	66.091	66.251	66.4197	66.5978	66.786	66.9854	67.1968	67.4213	67.6603	67.9151	68.1874	68.479
89	65.7533	65.9041	66.0629	66.2304	66.4072	66.5941	66.792	67.002	67.225	67.4624	67.7155	67.9861	68.2759
90	65.5727	65.7224	65.88	66.0463	66.2218	66.4074	66.604	66.8125	67.034	67.2699	67.5214	67.7903	68.0783
91	65.397	65.5456	65.7021	65.8672	66.0415	66.2258	66.421	66.6282	66.8482	67.0825	67.3325	67.5997	67.886
92	65.226	65.3735	65.529	65.6929	65.866	66.0491	66.243	66.4488	66.6674	66.9002	67.1486	67.4142	67.6988
93	65.0596	65.2061	65.3604	65.5232	65.6951	65.877	66.0697	66.2741	66.4914	66.7228	66.9696	67.2336	67.5165
94	64.8975	65.043	65.1963	65.358	65.5288	65.7095	65.9009	66.1041	66.32	66.5499	66.7953	67.0577	67.339
95	64.7396	64.8841	65.0364	65.1971	65.3668	65.5463	65.7366	65.9384	66.153	66.3816	66.6255	66.8864	67.1661
96	64.5857	64.7293	64.8806	65.0403	65.2089	65.3874	65.5764	65.7771	65.9904	66.2176	66.4601	66.7195	66.9976
97	64.4357	64.5784	64.7288	64.8874	65.0551	65.2324	65.4204	65.6198	65.8319	66.0578	66.2989	66.5568	66.8334
98	64.2894	64.4313	64.5807	64.7385	64.9051	65.0814	65.2682	65.4665	65.6774	65.902	66.1417	66.3982	66.6733
99	64.1468	64.2878	64.4364	64.5932	64.7588	64.9341	65.1199	65.317	65.5267	65.7501	65.9885	66.2436	66.5172
100	64.0076	64.1478	64.2955	64.4514	64.6161	64.7904	64.9752	65.1713	65.3798	65.6019	65.8391	66.0928	66.365
101	63.8718	64.0112	64.1581	64.3131	64.4769	64.6503	64.834	65.029	65.2364	65.4574	65.6933	65.9457	66.2165
102	63.7391	63.8778	64.0239	64.1781	64.341	64.5135	64.6962	64.8902	65.0965	65.3164	65.5511	65.8022	66.0716
103	63.6096	63.7475	63.8929	64.0463	64.2084	64.3799	64.5617	64.7547	64.96	65.1787	65.4122	65.6621	65.9301
104	63.4831	63.6203	63.7649	63.9175	64.0788	64.2495	64.4304	64.6224	64.8267	65.0443	65.2767	65.5253	65.7921
105	63.3595	63.496	63.6399	63.7917	63.9522	64.1221	64.3021	64.4932	64.6965	64.913	65.1443	65.3918	65.6573
106	63.2386	63.3745	63.5177	63.6688	63.8285	63.9976	64.1767	64.367	64.5693	64.7848	65.015	65.2613	65.5256
107	63.1204	63.2557	63.3982	63.5487	63.7076	63.8759	64.0542	64.2436	64.445	64.6595	64.8887	65.1339	65.397
108	63.0049	63.1395	63.2814	63.4312	63.5894	63.7569	63.9345	64.123	64.3235	64.5371	64.7652	65.0094	65.2713
109	62.8918	63.0259	63.1671	63.3163	63.4738	63.6406	63.8174	64.0051	64.2047	64.4174	64.6446	64.8876	65.1484
110	62.7812	62.9146	63.0553	63.2038	63.3608	63.5268	63.7029	63.8898	64.0885	64.3004	64.5266	64.7686	65.0283
111	62.6729	62.8058	62.9459	63.0938	63.2501	63.4155	63.5908	63.777	63.9749	64.1859	64.4111	64.6522	64.9109
112	62.5668	62.6992	62.8388	62.9861	63.1418	63.3065	63.4812	63.6666	63.8638	64.0739	64.2983	64.5384	64.796
113	62.4629	62.5949	62.7339	62.8807	63.0357	63.1999	63.3738	63.5585	63.755	63.9643	64.1878	64.427	64.6836
114	62.3612	62.4926	62.6312	62.7774	62.9319	63.0954	63.2687	63.4528	63.6485	63.857	64.0797	64.318	64.5736
115	62.2615	62.3925	62.5305	62.6762	62.8302	62.9931	63.1658	63.3492	63.5442	63.7519	63.9738	64.2113	64.466
116	62.1637	62.2943	62.4319	62.5771	62.7305	62.8929	63.065	63.2477	63.442	63.6491	63.8702	64.1068	64.3606
117	62.0679	62.198	62.3352	62.4799	62.6328	62.7947	62.9662	63.1483	63.342	63.5483	63.7686	64.0044	64.2574
118	61.9739	62.1036	62.2403	62.3846	62.5371	62.6984	62.8694	63.0509	63.2439	63.4496	63.6692	63.9042	64.1563
119	61.8818	62.0111	62.1474	62.2912	62.4432	62.604	62.7744	62.9554	63.1478	63.3528	63.5717	63.806	64.0572
120	61.7913	61.9203	62.0562	62.1996	62.3511	62.5114	62.6814	62.8618	63.0536	63.258	63.4762	63.7097	63.9602
121	61.7026	61.8311	61.9667	62.1096	62.2607	62.4206	62.5901	62.7699	62.9612	63.165	63.3826	63.6154	63.8651
122	61.6154	61.7437	61.8788	62.0214	62.1721	62.3315	62.5005	62.6799	62.8706	63.0738	63.2907	63.5229	63.7718
123	61.5299	61.6578	61.7926	61.9348	62.0851	62.2441	62.4126	62.5915	62.7817	62.9843	63.2007	63.4321	63.6804
124	61.4459	61.5735	61.7079	61.8498	61.9997	62.1583	62.3264	62.5048	62.6945	62.8966	63.1123	63.3431	63.5907
125	61.3634	61.4907	61.6248	61.7663	61.9158	62.0741	62.2417	62.4197	62.6089	62.8104	63.0256	63.2558	63.5027
126	61.2823	61.4093	61.5431	61.6843	61.8335	61.9913	62.1586	62.3361	62.5248	62.7259	62.9405	63.1702	63.4164
127	61.2027	61.3294	61.4629	61.6037	61.7526	61.9101	62.0769	62.254	62.4423	62.6429	62.857	63.0861	63.3317
128	61.1244	61.2508	61.384	61.5246	61.6731	61.8302	61.9967	62.1734	62.3613	62.5614	62.775	63.0035	63.2485
129	61.0474	61.1735	61.3065	61.4468	61.595	61.7518	61.9179	62.0942	62.2817	62.4813	62.6944	62.9224	63.1669
130	60.9717	61.0976	61.2303	61.3703	61.5182	61.6747	61.8405	62.0164	62.2035	62.4027	62.6153	62.8428	63.0867
131	60.8972	61.0229	61.1554	61.2951	61.4427	61.5989	61.7643	61.9399	62.1266	62.3254	62.5376	62.7646	63.008
132	60.824	60.9495	61.0817	61.2211	61.3685	61.5244	61.6895	61.8647	62.051	62.2495	62.4612	62.6877	62.9306
133	60.752	60.8772	61.0092	61.1484	61.2955	61.4511	61.6159	61.7908	61.9768	62.1748	62.3862	62.6122	62.8546
134	60.6811	60.8061	60.9379	61.0768	61.2237	61.379	61.5435	61.7181	61.9038	62.1014	62.3124	62.538	62.7799
135	60.6113	60.7361	60.8677	61.0064	61.153	61.3081	61.4723	61.6467	61.8319	62.0292	62.2398	62.465	62.7064
136	60.5426	60.6672	60.7986	60.9371	61.0835	61.2383	61.4023	61.5763	61.7613	61.9583	62.1684	62.3932	62.6342
137	60.475	60.5994	60.7306	60.8689	61.0151	61.1696	61.3334	61.5071	61.6918	61.8884	62.0983	62.3227	62.5632
138	60.4084	60.5327	60.6636	60.8018	60.9477	61.102	61.2655	61.439	61.6234	61.8197	62.0292	62.2532	62.4934
139	60.3428	60.4669	60.5977	60.7356	60.8814	61.0355	61.1988	61.372	61.5561	61.7521	61.9613	62.1849	62.4247
140	60.2782	60.4021	60.5327	60.6705	60.816	60.97	61.133	61.306	61.4898	61.6856	61.8944	62.1177	62.3571
141	60.2145	60.3383	60.4688	60.6064	60.7517	60.9054	61.0683	61.241	61.4246	61.6201	61.8286	62.0516	62.2906
142	60.1518	60.2755	60.4058	60.5432	60.6883	60.8419	61.0045	61.177	61.3604	61.5556	61.7638	61.9865	62.2251
143	60.09	60.2135	60.3436	60.4809	60.6259	60.7793	60.9417	61.114	61.2971	61.4921	61.7	61.9224	62.1607
144	60.029	60.1524	60.2824	60.4196	60.5644	60.7176	60.8798	61.0519	61.2348	61.4295	61.6372	61.8593	62.0973
145	59.969	60.0922	60.2221	60.3591	60.5038	60.6568	60.8188	60.9907	61.1734	61.3679	61.5753	61.7971	62.0348
146	59.9097	60.0329	60.1626	60.2995	60.444	60.5968	60.7587	60.9304	61.1129	61.3072	61.5144	61.7359	61.9733
147	59.8513	59.9744	60.104	60.2407	60.3851	60.5378	60.6995	60.871	61.0533	61.2474	61.4543	61.6756	61.9127
148	59.7937	59.9166	60.0462	60.1827	60.327	60.4795	60.6411	60.8125	60.9946	61.1884	61.3952	61.6162	61.853
149	59.7369	59.8597	59.9891	60.1256	60.2697	60.4221	60.5835	60.7547	60.9367	61.1303	61.3368	61.5576	61.7942
150	59.6808	59.8036	59.9329	60.0692	60.2132	60.3655	60.5268	60.6978	60.8796	61.073	61.2794	61.4999	61.7362
151	59.6255	59.7482	59.8774	60.0136	60.1575	60.3096	60.4708	60.6417	60.8233	61.0165	61.2227	61.443	61.6791
152	59.5709	59.6935	59.8226	59.9587	60.1025	60.2545	60.4155	60.5863	60.7677	60.9608	61.1668	61.3869	61.6228
153	59.5171	59.6396	59.7686	59.9046	60.0483	60.2002	60.3611	60.5317	60.713	60.9059	61.1117	61.3316	61.5672
154	59.4639	59.5863	59.7152	59.8512	59.9947	60.1466	60.3073	60.4778	60.6589	60.8517	61.0573	61.2771	61.5125
155	59.4114	59.5337	59.6626	59.7984	59.9419	60.0936	60.2543	60.4246	60.6056	60.7983	61.0037	61.2233	61.4585
156	59.3596	59.4819	59.6106	59.7464	59.8898	60.0414	60.2019	60.3722	60.5531	60.7456	60.9508	61.1702	61.4052
157	59.3085	59.4306	59.5593	59.695	59.8383	59.9898	60.1503	60.3204	60.5012	60.6935	60.8987	61.1179	61.3527
158	59.2579	59.38	59.5087	59.6443	59.7875	59.9389	60.0993	60.2693	60.4499	60.6422	60.8472	61.0662	61.3009
159	59.208	59.3301	59.4586	59.5942	59.7373	59.8887	60.0489	60.2188	60.3994	60.5915	60.7963	61.0153	61.2497
160	59.1588	59.2807	59.4092	59.5447	59.6878	59.839	59.9992	60.169	60.3495	60.5415	60.7462	60.965	61.1993
161	59.1101	59.232	59.3604	59.4958	59.6388	59.79	59.9501	60.1198	60.3002	60.4921	60.6967	60.9153	61.1495
162	59.062	59.1839	59.3122	59.4476	59.5905	59.7416	59.9016	60.0713	60.2515	60.4433	60.6478	60.8663	61.1003
163	59.0145	59.1363	59.2646	59.3999	59.5427	59.6938	59.8537	60.0233	60.2034	60.3951	60.5995	60.8179	61.0518
164	58.9675	59.0893	59.2175	59.3528	59.4956	59.6466	59.8064	59.9759	60.156	60.3476	60.5518	60.7701	61.0039
165	58.9211	59.0428	59.171	59.3062	59.449	59.5999	59.7597	59.9291	60.1091	60.3006	60.5048	60.7229	60.9565
166	58.8752	58.9969	59.1251	59.2602	59.4029	59.5538	59.7135	59.8829	60.0628	60.2542	60.4583	60.6763	60.9098
167	58.8299	58.9515	59.0797	59.2148	59.3574	59.5082	59.6679	59.8372	60.017	60.2083	60.4123	60.6303	60.8637
168	58.7851	58.9067	59.0348	59.1698	59.3124	59.4632	59.6228	59.792	59.9718	60.163	60.3669	60.5848	60.8181
169	58.7408	58.8623	58.9904	59.1254	59.2679	59.4187	59.5782	59.7474	59.9271	60.1183	60.3221	60.5399	60.773
170	58.697	58.8185	58.9465	59.0815	59.224	59.3746	59.5342	59.7033	59.8829	60.074	60.2778	60.4955	60.7286
171	58.6536	58.7751	58.9031	59.0381	59.1805	59.3311	59.4906	59.6597	59.8393	60.0303	60.234	60.4516	60.6846
172	58.6108	58.7323	58.8602	58.9951	59.1376	59.2881	59.4476	59.6166	59.7961	59.9871	60.1907	60.4082	60.6411
173	58.5684	58.6899	58.8178	58.9527	59.0951	59.2456	59.405	59.574	59.7535	59.9444	60.148	60.3654	60.5982
174	58.5265	58.6479	58.7758	58.9107	59.0531	59.2036	59.3629	59.5318	59.7113	59.9022	60.1057	60.323	60.5558
175	58.4851	58.6065	58.7343	58.8692	59.0115	59.162	59.3213	59.4902	59.6696	59.8604	60.0639	60.2812	60.5138
176	58.4441	58.5654	58.6933	58.8281	58.9704	59.1208	59.2801	59.449	59.6283	59.8191	60.0225	60.2398	60.4724
177	58.4035	58.5249	58.6527	58.7874	58.9297	59.0802	59.2394	59.4082	59.5875	59.7783	59.9816	60.1988	60.4314
178	58.3634	58.4847	58.6125	58.7472	58.8895	59.0399	59.1991	59.3679	59.5472	59.7379	59.9412	60.1584	60.3908
179	58.3236	58.445	58.5727	58.7075	58.8497	59.0001	59.1593	59.3281	59.5073	59.698	59.9012	60.1183	60.3507
180	58.2843	58.4056	58.5334	58.6681	58.8103	58.9607	59.1199	59.2886	59.4678	59.6585	59.8617	60.0787	60.3111
181	58.2454	58.3667	58.4945	58.6292	58.7714	58.9217	59.0809	59.2496	59.4288	59.6194	59.8226	60.0396	60.2719
182	58.2069	58.3282	58.456	58.5906	58.7328	58.8832	59.0423	59.211	59.3901	59.5807	59.7839	60.0008	60.2331
183	58.1688	58.2901	58.4178	58.5525	58.6947	58.845	59.0041	59.1728	59.3519	59.5425	59.7456	59.9625	60.1947
184	58.1311	58.2524	58.3801	58.5148	58.6569	58.8072	58.9663	59.135	59.3141	59.5046	59.7077	59.9246	60.1568
185	58.0938	58.215	58.3427	58.4774	58.6195	58.7698	58.9289	59.0975	59.2766	59.4671	59.6702	59.8871	60.1192
186	58.0568	58.1781	58.3057	58.4404	58.5825	58.7328	58.8919	59.0605	59.2396	59.4301	59.6331	59.8499	60.0821
187	58.0202	58.1414	58.2691	58.4038	58.5459	58.6962	58.8552	59.0238	59.2029	59.3934	59.5964	59.8132	60.0453
188	57.984	58.1052	58.2329	58.3675	58.5096	58.6599	58.8189	58.9875	59.1666	59.357	59.56	59.7768	60.0089
189	57.9481	58.0693	58.197	58.3316	58.4737	58.624	58.783	58.9516	59.1306	59.3211	59.5241	59.7408	59.9729
190	57.9125	58.0338	58.1614	58.2961	58.4382	58.5884	58.7474	58.916	59.0951	59.2855	59.4885	59.7052	59.9372
191	57.8773	57.9986	58.1262	58.2609	58.403	58.5532	58.7122	58.8808	59.0598	59.2503	59.4532	59.67	59.902
192	57.8425	57.9637	58.0914	58.226	58.3681	58.5183	58.6774	58.8459	59.025	59.2154	59.4183	59.635	59.867
193	57.808	57.9292	58.0569	58.1915	58.3336	58.4838	58.6428	58.8114	58.9904	59.1808	59.3838	59.6005	59.8325
194	57.7738	57.895	58.0227	58.1573	58.2994	58.4496	58.6086	58.7772	58.9562	59.1466	59.3495	59.5663	59.7982
195	57.7399	57.8611	57.9888	58.1234	58.2655	58.4157	58.5748	58.7433	58.9223	59.1127	59.3157	59.5324	59.7643
196	57.7063	57.8275	57.9552	58.0898	58.232	58.3822	58.5412	58.7098	58.8888	59.0792	59.2821	59.4988	59.7307
197	57.6731	57.7943	57.922	58.0566	58.1987	58.3489	58.508	58.6765	58.8556	59.046	59.2489	59.4656	59.6975
198	57.6401	57.7614	57.889	58.0237	58.1658	58.316	58.475	58.6436	58.8226	59.013	59.216	59.4326	59.6646
199	57.6075	57.7287	57.8564	57.991	58.1332	58.2834	58.4424	58.611	58.79	58.9804	59.1833	59.4	59.632
200	57.5751	57.6964	57.8241	57.9587	58.1008	58.2511	58.4101	58.5787	58.7577	58.9481	59.151	59.3677	59.5997
201	57.5431	57.6643	57.792	57.9267	58.0688	58.2191	58.3781	58.5467	58.7257	58.9161	59.1191	59.3358	59.5677
202	57.5113	57.6326	57.7603	57.8949	58.0371	58.1873	58.3464	58.515	58.694	58.8844	59.0874	59.3041	59.536
203	57.4798	57.6011	57.7288	57.8635	58.0056	58.1559	58.3149	58.4835	58.6626	58.853	59.0559	59.2727	59.5046
204	57.4486	57.5699	57.6976	57.8323	57.9744	58.1247	58.2838	58.4524	58.6314	58.8219	59.0248	59.2415	59.4735
205	57.4177	57.539	57.6667	57.8014	57.9435	58.0938	58.2529	58.4215	58.6006	58.791	58.994	59.2107	59.4427
206	57.387	57.5083	57.636	57.7707	57.9129	58.0632	58.2223	58.3909	58.57	58.7605	58.9634	59.1802	59.4121
207	57.3566	57.4779	57.6057	57.7404	57.8826	58.0329	58.192	58.3606	58.5397	58.7302	58.9331	59.1499	59.3819
208	57.3265	57.4478	57.5756	57.7103	57.8525	58.0028	58.1619	58.3306	58.5097	58.7001	58.9031	59.1199	59.3519
209	57.2966	57.4179	57.5457	57.6804	57.8226	57.973	58.1321	58.3008	58.4799	58.6704	58.8734	59.0902	59.3221
210	57.267	57.3883	57.5161	57.6508	57.7931	57.9434	58.1026	58.2712	58.4504	58.6409	58.8439	59.0607	59.2927
211	57.2377	57.359	57.4868	57.6215	57.7638	57.9141	58.0733	58.242	58.4211	58.6116	58.8147	59.0315	59.2635
212	57.2085	57.3299	57.4577	57.5924	57.7347	57.8851	58.0442	58.213	58.3921	58.5826	58.7857	59.0025	59.2345
213	57.1797	57.301	57.4288	57.5636	57.7059	57.8563	58.0154	58.1842	58.3633	58.5539	58.757	58.9738	59.2059
214	57.151	57.2724	57.4002	57.535	57.6773	57.8277	57.9869	58.1556	58.3348	58.5254	58.7285	58.9453	59.1774
215	57.1226	57.244	57.3719	57.5067	57.649	57.7994	57.9586	58.1274	58.3066	58.4972	58.7003	58.9171	59.1492
216	57.0945	57.2159	57.3437	57.4785	57.6209	57.7713	57.9305	58.0993	58.2785	58.4691	58.6723	58.8892	59.1213
217	57.0666	57.188	57.3158	57.4507	57.593	57.7434	57.9027	58.0715	58.2507	58.4414	58.6445	58.8614	59.0936
218	57.0389	57.1603	57.2882	57.423	57.5654	57.7158	57.8751	58.0439	58.2232	58.4138	58.617	58.8339	59.0661
219	57.0114	57.1328	57.2607	57.3956	57.5379	57.6884	57.8477	58.0166	58.1958	58.3865	58.5897	58.8066	59.0388
220	56.9841	57.1056	57.2335	57.3684	57.5108	57.6612	57.8206	57.9894	58.1687	58.3594	58.5626	58.7796	59.0118
221	56.9571	57.0786	57.2065	57.3414	57.4838	57.6343	57.7936	57.9625	58.1418	58.3325	58.5358	58.7528	58.985
222	56.9303	57.0518	57.1797	57.3146	57.457	57.6076	57.7669	57.9358	58.1152	58.3059	58.5092	58.7262	58.9584
223	56.9037	57.0252	57.1531	57.2881	57.4305	57.581	57.7404	57.9093	58.0887	58.2795	58.4827	58.6998	58.9321
224	56.8773	56.9988	57.1268	57.2617	57.4042	57.5547	57.7141	57.8831	58.0625	58.2532	58.4566	58.6736	58.9059
225	56.8511	56.9726	57.1006	57.2356	57.378	57.5286	57.688	57.857	58.0364	58.2272	58.4306	58.6477	58.88
226	56.8251	56.9467	57.0747	57.2096	57.3521	57.5027	57.6622	57.8312	58.0106	58.2014	58.4048	58.6219	58.8543
227	56.7993	56.9209	57.0489	57.1839	57.3264	57.4771	57.6365	57.8055	57.985	58.1758	58.3792	58.5964	58.8288
228	56.7738	56.8953	57.0234	57.1584	57.3009	57.4516	57.611	57.7801	57.9596	58.1504	58.3539	58.571	58.8035
229	56.7484	56.87	56.998	57.1331	57.2756	57.4263	57.5858	57.7548	57.9343	58.1253	58.3287	58.5459	58.7783
230	56.7232	56.8448	56.9729	57.1079	57.2505	57.4012	57.5607	57.7298	57.9093	58.1003	58.3037	58.521	58.7534
231	56.6982	56.8198	56.9479	57.083	57.2256	57.3763	57.5358	57.7049	57.8845	58.0755	58.2789	58.4962	58.7287
232	56.6734	56.795	56.9231	57.0582	57.2008	57.3516	57.5111	57.6803	57.8598	58.0508	58.2544	58.4717	58.7042
233	56.6488	56.7704	56.8985	57.0337	57.1763	57.327	57.4866	57.6558	57.8354	58.0264	58.23	58.4473	58.6799
234	56.6243	56.746	56.8741	57.0093	57.1519	57.3027	57.4623	57.6315	57.8111	58.0022	58.2058	58.4231	58.6557
235	56.6001	56.7218	56.8499	56.9851	57.1277	57.2785	57.4382	57.6074	57.787	57.9781	58.1817	58.3991	58.6318
236	56.576	56.6977	56.8259	56.9611	57.1037	57.2546	57.4142	57.5835	57.7631	57.9543	58.1579	58.3753	58.608
237	56.5521	56.6738	56.802	56.9372	57.0799	57.2308	57.3905	57.5597	57.7394	57.9306	58.1342	58.3517	58.5844
238	56.5284	56.6501	56.7783	56.9135	57.0563	57.2072	57.3669	57.5361	57.7159	57.9071	58.1108	58.3282	58.561
239	56.5048	56.6266	56.7548	56.8901	57.0328	57.1837	57.3434	57.5128	57.6925	57.8837	58.0874	58.305	58.5377
240	56.4814	56.6032	56.7315	56.8667	57.0095	57.1604	57.3202	57.4895	57.6693	57.8606	58.0643	58.2819	58.5147
241	56.4582	56.58	56.7083	56.8436	56.9864	57.1373	57.2971	57.4665	57.6463	57.8376	58.0414	58.2589	58.4918
242	56.4352	56.557	56.6853	56.8206	56.9634	57.1144	57.2742	57.4436	57.6234	57.8147	58.0186	58.2362	58.4691
243	56.4123	56.5341	56.6625	56.7978	56.9406	57.0916	57.2515	57.4209	57.6008	57.7921	57.9959	58.2136	58.4465
244	56.3896	56.5115	56.6398	56.7751	56.918	57.069	57.2289	57.3983	57.5782	57.7696	57.9735	58.1912	58.4241
245	56.367	56.4889	56.6173	56.7526	56.8955	57.0466	57.2064	57.3759	57.5559	57.7472	57.9512	58.1689	58.4019
246	56.3446	56.4665	56.5949	56.7303	56.8732	57.0243	57.1842	57.3537	57.5337	57.7251	57.929	58.1468	58.3798
247	56.3224	56.4443	56.5727	56.7081	56.8511	57.0022	57.1621	57.3316	57.5116	57.7031	57.907	58.1248	58.3579
248	56.3003	56.4223	56.5507	56.6861	56.8291	56.9802	57.1401	57.3097	57.4897	57.6812	57.8852	58.1031	58.3361
249	56.2784	56.4004	56.5288	56.6642	56.8072	56.9584	57.1184	57.2879	57.468	57.6595	57.8636	58.0814	58.3146
250	56.2566	56.3786	56.5071	56.6425	56.7855	56.9367	57.0967	57.2663	57.4464	57.638	57.842	58.0599	58.2931
251	56.235	56.357	56.4855	56.621	56.764	56.9152	57.0752	57.2449	57.425	57.6166	57.8207	58.0386	58.2718
252	56.2135	56.3355	56.4641	56.5996	56.7426	56.8938	57.0539	57.2236	57.4037	57.5953	57.7995	58.0174	58.2507
253	56.1922	56.3142	56.4428	56.5783	56.7214	56.8726	57.0327	57.2024	57.3826	57.5742	57.7784	57.9964	58.2297
254	56.171	56.2931	56.4216	56.5572	56.7003	56.8515	57.0117	57.1814	57.3616	57.5533	57.7575	57.9755	58.2088
255	56.15	56.272	56.4006	56.5362	56.6793	56.8306	56.9907	57.1605	57.3407	57.5324	57.7367	57.9548	58.1881
256	56.1291	56.2512	56.3798	56.5154	56.6585	56.8098	56.97	57.1398	57.32	57.5118	57.7161	57.9342	58.1676
257	56.1083	56.2304	56.359	56.4947	56.6378	56.7892	56.9494	57.1192	57.2995	57.4912	57.6956	57.9137	58.1472
258	56.0877	56.2098	56.3385	56.4741	56.6173	56.7687	56.9289	57.0987	57.2791	57.4709	57.6752	57.8934	58.1269
259	56.0672	56.1894	56.318	56.4537	56.5969	56.7483	56.9085	57.0784	57.2588	57.4506	57.655	57.8732	58.1067
260	56.0468	56.169	56.2977	56.4334	56.5766	56.7281	56.8883	57.0582	57.2386	57.4305	57.6349	57.8532	58.0867
261	56.0266	56.1488	56.2775	56.4132	56.5565	56.708	56.8683	57.0382	57.2186	57.4105	57.615	57.8333	58.0669
262	56.0066	56.1288	56.2575	56.3932	56.5365	56.688	56.8483	57.0183	57.1987	57.3907	57.5952	57.8135	58.0471
263	55.9866	56.1088	56.2376	56.3733	56.5167	56.6682	56.8285	56.9985	57.179	57.371	57.5755	57.7939	58.0275
264	55.9668	56.089	56.2178	56.3536	56.4969	56.6485	56.8088	56.9789	57.1594	57.3514	57.5559	57.7744	58.0081
265	55.9471	56.0694	56.1982	56.334	56.4773	56.6289	56.7893	56.9593	57.1399	57.3319	57.5365	57.755	57.9887
266	55.9275	56.0498	56.1786	56.3145	56.4579	56.6094	56.7699	56.9399	57.1205	57.3126	57.5172	57.7357	57.9695
267	55.9081	56.0304	56.1592	56.2951	56.4385	56.5901	56.7506	56.9207	57.1013	57.2934	57.4981	57.7166	57.9504
268	55.8888	56.0111	56.14	56.2758	56.4193	56.5709	56.7314	56.9015	57.0822	57.2743	57.479	57.6976	57.9315
269	55.8696	55.9919	56.1208	56.2567	56.4002	56.5518	56.7123	56.8825	57.0632	57.2553	57.4601	57.6787	57.9126
270	55.8505	55.9729	56.1018	56.2377	56.3812	56.5329	56.6934	56.8636	57.0443	57.2365	57.4413	57.6599	57.8939
271	55.8315	55.9539	56.0829	56.2188	56.3623	56.514	56.6746	56.8448	57.0256	57.2178	57.4226	57.6413	57.8753
272	55.8127	55.9351	56.0641	56.2	56.3436	56.4953	56.6559	56.8262	57.0069	57.1992	57.4041	57.6228	57.8568
273	55.794	55.9164	56.0454	56.1814	56.325	56.4767	56.6374	56.8076	56.9884	57.1807	57.3856	57.6044	57.8385
274	55.7754	55.8979	56.0269	56.1629	56.3065	56.4582	56.6189	56.7892	56.97	57.1624	57.3673	57.5861	57.8202
275	55.7569	55.8794	56.0084	56.1444	56.2881	56.4399	56.6006	56.7709	56.9518	57.1441	57.3491	57.5679	57.8021
276	55.7385	55.8611	55.9901	56.1261	56.2698	56.4216	56.5823	56.7527	56.9336	57.126	57.331	57.5499	57.7841
277	55.7203	55.8428	55.9719	56.108	56.2516	56.4035	56.5642	56.7346	56.9156	57.108	57.313	57.5319	57.7662
278	55.7021	55.8247	55.9538	56.0899	56.2336	56.3855	56.5462	56.7167	56.8976	57.0901	57.2951	57.5141	57.7484
279	55.6841	55.8067	55.9358	56.0719	56.2156	56.3675	56.5283	56.6988	56.8798	57.0723	57.2774	57.4964	57.7307
280	55.6662	55.7888	55.9179	56.054	56.1978	56.3497	56.5106	56.6811	56.8621	57.0546	57.2597	57.4788	57.7131
281	55.6484	55.771	55.9001	56.0363	56.1801	56.332	56.4929	56.6634	56.8445	57.037	57.2422	57.4613	57.6957
282	55.6322	55.7547	55.8837	56.0198	56.1635	56.3154	56.4762	56.6466	56.8276	57.0202	57.2253	57.4443	57.6787
283	55.6337	55.7549	55.8826	56.0174	56.1598	56.3106	56.4703	56.6397	56.8197	57.0113	57.2156	57.4338	57.6674
284	55.7021	55.8177	55.9401	56.0697	56.2072	56.353	56.508	56.6729	56.8485	57.0359	57.2362	57.4506	57.6806
285	55.8995	56.0036	56.1145	56.2327	56.3589	56.4936	56.6377	56.7919	56.9571	57.1343	57.3247	57.5295	57.7503
286	56.2671	56.3541	56.4478	56.5486	56.6573	56.7744	56.901	57.0376	57.1852	57.3451	57.5183	57.7063	57.9105
287	56.8107	56.8778	56.951	57.0308	57.1179	57.213	57.317	57.4307	57.5552	57.6915	57.8411	58.0054	58.1858
288	57.5074	57.555	57.6075	57.6658	57.7304	57.802	57.8816	57.97	58.0683	58.1776	58.2994	58.4352	58.5866
289	58.3209	58.3513	58.3855	58.4242	58.468	58.5176	58.5737	58.6372	58.7092	58.7909	58.8837	58.9892	59.1091
290	59.2133	59.2298	59.2491	59.2716	59.2978	59.3283	59.3639	59.4052	59.4533	59.5093	59.5746	59.6507	59.7393
291	60.1531	60.1587	60.1663	60.176	60.1883	60.2035	60.2223	60.2452	60.273	60.3068	60.3478	60.3974	60.4571
292	61.1168	61.114	61.1124	61.1123	61.1137	61.117	61.1226	61.1309	61.1425	61.1582	61.179	61.206	61.2408
293	62.0893	62.0793	62.0702	62.0621	62.0549	62.049	62.0443	62.0413	62.0403	62.0418	62.0465	62.0553	62.0695
294	63.061	63.0444	63.0286	63.0135	62.9992	62.9856	62.9728	62.9609	62.95	62.9405	62.9327	62.9273	62.9251
295	64.0262	64.0031	63.9809	63.9593	63.9383	63.918	63.8982	63.8789	63.8601	63.8419	63.8244	63.8079	63.793
296	64.9811	64.9517	64.9229	64.8949	64.8676	64.8409	64.8146	64.7887	64.7631	64.7376	64.7123	64.6871	64.6622
297	65.9232	65.8874	65.8522	65.8178	65.7841	65.751	65.7184	65.6862	65.6542	65.6223	65.5902	65.5578	65.5251
298	66.8503	66.8082	66.7668	66.726	66.6859	66.6464	66.6075	66.569	66.5309	66.4928	66.4545	66.4158	66.3764
299	67.7604	67.7124	67.6649	67.618	67.5717	67.5259	67.4807	67.4359	67.3916	67.3474	67.3031	67.2584	67.2129
300	68.6517	68.5984	68.5453	68.4926	68.4402	68.3884	68.3369	68.286	68.2354	68.1851	68.1348	68.0842	68.0329
301	69.5228	69.4646	69.4065	69.3484	69.2906	69.2329	69.1756	69.1185	69.0619	69.0054	68.9491	68.8926	68.8355
302	70.3725	70.3101	70.2474	70.1846	70.1216	70.0587	69.9958	69.933	69.8704	69.808	69.7457	69.6832	69.6204
303	71.1998	71.1337	71.0671	71.0001	70.9326	70.8649	70.797	70.7289	70.6607	70.5926	70.5244	70.456	70.3874
304	72.0042	71.9349	71.8649	71.7942	71.7229	71.651	71.5785	71.5056	71.4323	71.3588	71.285	71.211	71.1367
305	72.7853	72.7133	72.6404	72.5666	72.4919	72.4163	72.3399	72.2627	72.1849	72.1064	72.0275	71.9481	71.8682
306	73.5429	73.4687	73.3934	73.3169	73.2393	73.1606	73.0808	72.9999	72.918	72.8352	72.7516	72.6671	72.582
307	74.2771	74.201	74.1237	74.0451	73.9651	73.8838	73.8011	73.717	73.6316	73.545	73.4571	73.3681	73.2781
308	74.988	74.9105	74.8316	74.7511	74.6692	74.5857	74.5006	74.4138	74.3255	74.2355	74.144	74.051	73.9566
309	75.6759	75.5973	75.5171	75.4353	75.3518	75.2665	75.1794	75.0904	74.9996	74.9069	74.8122	74.7157	74.6174
310	76.3412	76.2618	76.1807	76.0978	76.013	75.9264	75.8377	75.747	75.6541	75.5591	75.4618	75.3623	75.2606
311	76.9843	76.9043	76.8226	76.739	76.6533	76.5656	76.4758	76.3836	76.2891	76.1922	76.0928	75.9908	75.8862
312	77.6056	77.5255	77.4434	77.3593	77.2731	77.1846	77.0939	77.0007	76.905	76.8066	76.7054	76.6014	76.4945
313	78.2058	78.1257	78.0435	77.9592	77.8726	77.7838	77.6924	77.5985	77.5019	77.4024	77.2999	77.1943	77.0854
314	78.7854	78.7054	78.6234	78.5391	78.4525	78.3635	78.2718	78.1775	78.0802	77.98	77.8765	77.7697	77.6593
315	79.3448	79.2653	79.1836	79.0996	79.0132	78.9242	78.8325	78.738	78.6404	78.5397	78.4356	78.3279	78.2164
316	79.8848	79.8059	79.7248	79.6412	79.5552	79.4665	79.375	79.2805	79.1829	79.082	78.9775	78.8693	78.757
317	80.406	80.3278	80.2474	80.1645	80.079	79.9908	79.8997	79.8055	79.7081	79.6072	79.5027	79.3942	79.2814
318	80.9089	80.8316	80.7521	80.67	80.5853	80.4977	80.4072	80.3135	80.2165	80.1159	80.0115	79.903	79.7901
319	81.3941	81.3179	81.2394	81.1582	81.0744	80.9877	80.8979	80.8049	80.7085	80.6084	80.5043	80.3961	80.2833
320	81.8623	81.7873	81.7099	81.6298	81.547	81.4613	81.3724	81.2803	81.1846	81.0852	80.9817	80.8739	80.7614
321	82.3141	82.2403	82.1641	82.0853	82.0036	81.919	81.8312	81.74	81.6453	81.5467	81.444	81.3368	81.2249
322	82.75	82.6776	82.6027	82.5251	82.4447	82.3614	82.2747	82.1847	82.0911	81.9935	81.8917	81.7854	81.6741
323	83.1706	83.0996	83.0262	82.95	82.8709	82.7889	82.7036	82.6148	82.5224	82.4259	82.3252	82.2198	82.1095
324	83.5766	83.507	83.435	83.3603	83.2827	83.2021	83.1182	83.0308	82.9396	82.8445	82.7449	82.6407	82.5314
325	83.9684	83.9004	83.8299	83.7567	83.6806	83.6015	83.519	83.4331	83.3433	83.2496	83.1514	83.0484	82.9404
326	84.3466	84.2802	84.2113	84.1396	84.0651	83.9875	83.9066	83.8222	83.734	83.6417	83.5449	83.4434	83.3366
327	84.7118	84.6469	84.5796	84.5096	84.4367	84.3607	84.2814	84.1986	84.1119	84.0212	83.926	83.826	83.7206
328	85.0644	85.0012	84.9355	84.8671	84.7958	84.7215	84.6438	84.5627	84.4777	84.3886	84.295	84.1966	84.0928
329	85.405	85.3433	85.2793	85.2126	85.143	85.0703	84.9944	84.9149	84.8317	84.7443	84.6524	84.5556	84.4534
330	85.7339	85.6739	85.6116	85.5465	85.4786	85.4077	85.3335	85.2558	85.1743	85.0886	84.9985	84.9034	84.803
331	86.0518	85.9934	85.9328	85.8694	85.8032	85.734	85.6616	85.5856	85.5059	85.422	85.3337	85.2404	85.1418
332	86.359	86.3023	86.2433	86.1816	86.1171	86.0497	85.979	85.9048	85.8269	85.7449	85.6584	85.567	85.4702
333	86.6559	86.6008	86.5435	86.4835	86.4208	86.3551	86.2862	86.2139	86.1378	86.0576	85.973	85.8835	85.7886
334	86.943	86.8896	86.8339	86.7756	86.7146	86.6507	86.5836	86.513	86.4388	86.3605	86.2778	86.1902	86.0972
335	87.2207	87.1689	87.1149	87.0582	86.999	86.9368	86.8714	86.8027	86.7304	86.654	86.5732	86.4875	86.3965
336	87.4894	87.4391	87.3867	87.3318	87.2742	87.2138	87.1502	87.0833	87.0128	86.9383	86.8595	86.7758	86.6867
337	87.7494	87.7007	87.6499	87.5966	87.5407	87.482	87.4202	87.3551	87.2865	87.2139	87.137	87.0553	86.9682
338	88.001	87.9539	87.9047	87.853	87.7988	87.7418	87.6818	87.6185	87.5517	87.481	87.406	87.3263	87.2413
339	88.2447	88.199	88.1515	88.1014	88.0488	87.9935	87.9352	87.8737	87.8088	87.74	87.6669	87.5892	87.5062
340	88.4807	88.4366	88.3905	88.342	88.2911	88.2375	88.1809	88.1212	88.058	87.9911	87.92	87.8442	87.7633
341	88.7094	88.6667	88.6222	88.5752	88.5259	88.4739	88.419	88.3611	88.2997	88.2347	88.1655	88.0917	88.0127
342	88.931	88.8897	88.8467	88.8013	88.7535	88.7032	88.6499	88.5937	88.5342	88.471	88.4036	88.3318	88.2549
343	89.1459	89.106	89.0644	89.0205	88.9742	88.9255	88.8739	88.8194	88.7616	88.7002	88.6348	88.5649	88.49
344	89.3542	89.3157	89.2756	89.2331	89.1884	89.1412	89.0912	89.0384	88.9824	88.9228	88.8592	88.7912	88.7183
345	89.5564	89.5192	89.4804	89.4394	89.3961	89.3505	89.3021	89.2509	89.1966	89.1388	89.077	89.011	88.94
346	89.7526	89.7167	89.6793	89.6396	89.5978	89.5537	89.5069	89.4573	89.4046	89.3485	89.2886	89.2244	89.1554
347	89.943	89.9084	89.8723	89.834	89.7936	89.751	89.7056	89.6576	89.6066	89.5523	89.4941	89.4318	89.3647
348	90.1279	90.0946	90.0598	90.0228	89.9838	89.9425	89.8987	89.8523	89.8029	89.7502	89.6938	89.6333	89.5681
349	90.3076	90.2754	90.2419	90.2062	90.1685	90.1287	90.0863	90.0414	89.9936	89.9425	89.8878	89.8291	89.7658
350	90.4822	90.4511	90.4188	90.3844	90.348	90.3096	90.2686	90.2251	90.1789	90.1295	90.0765	90.0195	89.958
351	90.6519	90.622	90.5908	90.5576	90.5225	90.4854	90.4458	90.4038	90.3591	90.3112	90.2599	90.2046	90.1449
352	90.8169	90.7881	90.7581	90.7261	90.6922	90.6564	90.6181	90.5775	90.5343	90.488	90.4382	90.3847	90.3267
353	90.9774	90.9496	90.9208	90.8899	90.8573	90.8227	90.7857	90.7465	90.7047	90.6599	90.6118	90.5599	90.5036
354	91.1336	91.1068	91.0791	91.0493	91.0178	90.9845	90.9488	90.9109	90.8705	90.8272	90.7806	90.7303	90.6758
355	91.2856	91.2599	91.2331	91.2045	91.1741	91.142	91.1075	91.0709	91.0319	90.99	90.9449	90.8962	90.8434
356	91.4337	91.4089	91.3832	91.3556	91.3263	91.2953	91.262	91.2267	91.189	91.1486	91.1049	91.0578	91.0065
357	91.5779	91.554	91.5293	91.5027	91.4745	91.4446	91.4125	91.3784	91.342	91.3029	91.2607	91.2151	91.1654
358	91.7183	91.6954	91.6716	91.646	91.6188	91.59	91.5591	91.5262	91.491	91.4533	91.4125	91.3683	91.3202
359	91.8553	91.8331	91.8103	91.7857	91.7595	91.7318	91.7019	91.6702	91.6362	91.5998	91.5603	91.5176	91.471
360	91.9888	91.9675	91.9456	91.9218	91.8966	91.8699	91.8411	91.8105	91.7778	91.7425	91.7044	91.6631	91.6179
361	92.119	92.0985	92.0774	92.0546	92.0303	92.0046	91.9768	91.9473	91.9157	91.8817	91.8449	91.8049	91.7612
362	92.246	92.2263	92.2061	92.1841	92.1608	92.1359	92.1092	92.0807	92.0503	92.0175	91.9819	91.9433	91.9009
363	92.37	92.351	92.3316	92.3105	92.288	92.2641	92.2383	92.2109	92.1815	92.1498	92.1155	92.0781	92.0372
364	92.491	92.4728	92.4542	92.4338	92.4122	92.3892	92.3643	92.3378	92.3095	92.279	92.2458	92.2097	92.1701
365	92.6092	92.5917	92.5738	92.5542	92.5334	92.5113	92.4873	92.4618	92.4345	92.4051	92.373	92.3381	92.2998
366	92.7247	92.7078	92.6906	92.6718	92.6518	92.6305	92.6074	92.5828	92.5565	92.5281	92.4972	92.4635	92.4263
367	92.8375	92.8212	92.8048	92.7867	92.7674	92.7469	92.7246	92.701	92.6756	92.6483	92.6184	92.5859	92.5499
368	92.9477	92.9321	92.9164	92.8989	92.8804	92.8607	92.8392	92.8164	92.792	92.7656	92.7368	92.7054	92.6706
369	93.0555	93.0405	93.0254	93.0087	92.9908	92.9719	92.9512	92.9292	92.9057	92.8803	92.8525	92.8221	92.7885
370	93.161	93.1465	93.1321	93.1159	93.0988	93.0805	93.0606	93.0395	93.0168	92.9923	92.9655	92.9362	92.9036
371	93.2641	93.2502	93.2364	93.2209	93.2043	93.1868	93.1676	93.1472	93.1254	93.1018	93.076	93.0476	93.0162
372	93.365	93.3516	93.3384	93.3235	93.3076	93.2908	93.2723	93.2526	93.2316	93.2089	93.1839	93.1566	93.1262
373	93.4638	93.4509	93.4383	93.4239	93.4087	93.3925	93.3746	93.3557	93.3355	93.3136	93.2896	93.2632	93.2337
374	93.5605	93.5481	93.536	93.5223	93.5076	93.492	93.4748	93.4566	93.4372	93.4161	93.3929	93.3674	93.3389
375	93.6552	93.6433	93.6317	93.6185	93.6044	93.5894	93.5728	93.5553	93.5366	93.5163	93.4939	93.4693	93.4418
376	93.748	93.7366	93.7255	93.7128	93.6992	93.6848	93.6688	93.652	93.634	93.6144	93.5928	93.5691	93.5425
377	93.839	93.8279	93.8173	93.8051	93.792	93.7782	93.7628	93.7466	93.7293	93.7104	93.6896	93.6668	93.641
378	93.9281	93.9174	93.9073	93.8956	93.883	93.8697	93.8549	93.8393	93.8226	93.8045	93.7844	93.7623	93.7374
379	94.0154	94.0052	93.9956	93.9843	93.9722	93.9594	93.9451	93.9301	93.9141	93.8966	93.8773	93.856	93.8319
380	94.1011	94.0912	94.0821	94.0712	94.0596	94.0473	94.0335	94.0191	94.0036	93.9868	93.9682	93.9476	93.9243
381	94.1851	94.1756	94.1669	94.1564	94.1453	94.1335	94.1202	94.1063	94.0914	94.0753	94.0573	94.0375	94.0149
382	94.2676	94.2584	94.2501	94.24	94.2293	94.218	94.2052	94.1918	94.1775	94.1619	94.1446	94.1255	94.1037
383	94.3484	94.3396	94.3317	94.3221	94.3117	94.3009	94.2885	94.2756	94.2619	94.2469	94.2302	94.2118	94.1906
384	94.4278	94.4194	94.4118	94.4025	94.3926	94.3822	94.3703	94.3578	94.3446	94.3303	94.3142	94.2963	94.2759
385	94.5058	94.4976	94.4905	94.4815	94.472	94.4619	94.4505	94.4385	94.4258	94.412	94.3965	94.3793	94.3595
386	94.5823	94.5745	94.5677	94.5591	94.5499	94.5403	94.5292	94.5177	94.5055	94.4922	94.4772	94.4606	94.4414
387	94.6575	94.6499	94.6435	94.6352	94.6264	94.6171	94.6065	94.5954	94.5837	94.5708	94.5564	94.5404	94.5218
388	94.7314	94.724	94.7179	94.71	94.7015	94.6926	94.6823	94.6716	94.6604	94.6481	94.6342	94.6187	94.6007
389	94.8039	94.7969	94.7911	94.7835	94.7753	94.7668	94.7568	94.7465	94.7357	94.7239	94.7105	94.6956	94.6781
390	94.8752	94.8684	94.863	94.8556	94.8478	94.8396	94.83	94.8201	94.8097	94.7983	94.7854	94.771	94.7541
391	94.9453	94.9388	94.9336	94.9266	94.919	94.9111	94.9019	94.8923	94.8824	94.8714	94.859	94.8451	94.8287
392	95.0143	95.0079	95.0031	94.9963	94.989	94.9815	94.9725	94.9633	94.9537	94.9432	94.9312	94.9178	94.9019
393	95.082	95.0759	95.0713	95.0648	95.0578	95.0506	95.0419	95.0331	95.0239	95.0138	95.0022	94.9892	94.9738
394	95.1487	95.1428	95.1385	95.1322	95.1255	95.1185	95.1102	95.1017	95.0928	95.0831	95.0719	95.0594	95.0445
395	95.2143	95.2086	95.2045	95.1985	95.192	95.1854	95.1773	95.1691	95.1606	95.1512	95.1405	95.1284	95.1139
396	95.2788	95.2733	95.2695	95.2637	95.2575	95.2511	95.2432	95.2354	95.2272	95.2182	95.2078	95.1962	95.182
397	95.3423	95.3369	95.3335	95.3279	95.3219	95.3157	95.3081	95.3006	95.2927	95.2841	95.2741	95.2628	95.2491
398	95.4048	95.3996	95.3964	95.391	95.3852	95.3793	95.372	95.3647	95.3571	95.3488	95.3392	95.3283	95.315
399	95.4663	95.4613	95.4583	95.4531	95.4476	95.4419	95.4348	95.4278	95.4205	95.4125	95.4033	95.3927	95.3797
400	95.5269	95.522	95.5193	95.5143	95.5089	95.5035	95.4966	95.4898	95.4829	95.4752	95.4663	95.456	95.4434
401	95.5865	95.5818	95.5793	95.5745	95.5694	95.5641	95.5575	95.5509	95.5442	95.5369	95.5282	95.5184	95.5061
402	95.6453	95.6407	95.6384	95.6338	95.6288	95.6238	95.6174	95.611	95.6046	95.5976	95.5892	95.5797	95.5677
403	95.7031	95.6987	95.6966	95.6922	95.6874	95.6826	95.6763	95.6702	95.6641	95.6573	95.6493	95.64	95.6284
404	95.7601	95.7559	95.754	95.7497	95.7451	95.7405	95.7344	95.7285	95.7226	95.7161	95.7083	95.6994	95.688
405	95.8163	95.8122	95.8105	95.8064	95.8019	95.7975	95.7916	95.7859	95.7803	95.774	95.7665	95.7579	95.7468
406	95.8717	95.8676	95.8662	95.8622	95.8579	95.8537	95.8479	95.8425	95.8371	95.8311	95.8238	95.8154	95.8046
407	95.9262	95.9223	95.921	95.9172	95.9131	95.9091	95.9035	95.8982	95.893	95.8872	95.8802	95.8721	95.8615
408	95.98	95.9762	95.9751	95.9714	95.9675	95.9636	95.9581	95.9531	95.9481	95.9425	95.9358	95.9279	95.9175
409	96.033	96.0293	96.0284	96.0249	96.0211	96.0174	96.0121	96.0071	96.0024	95.997	95.9905	95.9829	95.9727
410	96.0853	96.0817	96.081	96.0776	96.0739	96.0704	96.0652	96.0604	96.0559	96.0508	96.0444	96.037	96.0271
411	96.1369	96.1334	96.1328	96.1295	96.126	96.1226	96.1176	96.113	96.1086	96.1037	96.0976	96.0904	96.0807
412	96.1877	96.1843	96.184	96.1808	96.1774	96.1741	96.1692	96.1648	96.1606	96.1559	96.1499	96.143	96.1334
413	96.2379	96.2346	96.2344	96.2313	96.228	96.2249	96.2201	96.2158	96.2118	96.2073	96.2016	96.1948	96.1854
414	96.2874	96.2841	96.2841	96.2812	96.278	96.275	96.2703	96.2662	96.2623	96.258	96.2524	96.2459	96.2367
415	96.3362	96.3331	96.3332	96.3303	96.3273	96.3244	96.3198	96.3158	96.3121	96.308	96.3026	96.2962	96.2872
416	96.3844	96.3813	96.3816	96.3789	96.3759	96.3732	96.3687	96.3648	96.3613	96.3573	96.3521	96.3459	96.337
417	96.432	96.4289	96.4294	96.4267	96.4239	96.4213	96.4169	96.4131	96.4098	96.406	96.4009	96.3948	96.3861
418	96.4789	96.4759	96.4765	96.474	96.4712	96.4688	96.4644	96.4608	96.4576	96.4539	96.449	96.4431	96.4345
419	96.5252	96.5223	96.5231	96.5206	96.518	96.5156	96.5114	96.5079	96.5048	96.5013	96.4965	96.4908	96.4823
420	96.5709	96.5681	96.569	96.5667	96.5641	96.5618	96.5577	96.5543	96.5513	96.548	96.5434	96.5378	96.5294
421	96.6161	96.6133	96.6144	96.6121	96.6096	96.6075	96.6034	96.6001	96.5973	96.5941	96.5896	96.5841	96.5758
422	96.6607	96.6579	96.6592	96.657	96.6546	96.6525	96.6485	96.6453	96.6426	96.6396	96.6352	96.6299	96.6217
423	96.7047	96.702	96.7034	96.7013	96.699	96.697	96.693	96.69	96.6874	96.6845	96.6802	96.675	96.6669
424	96.7482	96.7455	96.7471	96.745	96.7428	96.7409	96.737	96.734	96.7316	96.7288	96.7247	96.7196	96.7116
425	96.7911	96.7885	96.7902	96.7882	96.7861	96.7843	96.7805	96.7775	96.7752	96.7725	96.7685	96.7636	96.7556
426	96.8335	96.831	96.8328	96.8309	96.8288	96.8271	96.8233	96.8205	96.8183	96.8157	96.8119	96.807	96.7991
427	96.8755	96.873	96.8749	96.8731	96.871	96.8695	96.8657	96.863	96.8608	96.8584	96.8546	96.8499	96.842
428	96.9169	96.9144	96.9165	96.9147	96.9128	96.9113	96.9076	96.9049	96.9029	96.9005	96.8969	96.8922	96.8844
429	96.9578	96.9553	96.9576	96.9559	96.954	96.9526	96.9489	96.9463	96.9444	96.9422	96.9386	96.934	96.9262
430	96.9982	96.9958	96.9982	96.9965	96.9947	96.9934	96.9897	96.9872	96.9854	96.9833	96.9798	96.9753	96.9676
431	97.0382	97.0358	97.0383	97.0367	97.0349	97.0337	97.0301	97.0276	97.0259	97.0239	97.0205	97.0161	97.0084
432	97.0776	97.0753	97.078	97.0764	97.0747	97.0735	97.0699	97.0676	97.0659	97.064	97.0607	97.0563	97.0487
433	97.1167	97.1144	97.1172	97.1157	97.114	97.1129	97.1093	97.107	97.1055	97.1037	97.1004	97.0961	97.0885
434	97.1552	97.153	97.1559	97.1545	97.1528	97.1518	97.1483	97.146	97.1446	97.1428	97.1397	97.1355	97.1278
435	97.1934	97.1911	97.1942	97.1928	97.1912	97.1903	97.1868	97.1846	97.1832	97.1816	97.1785	97.1743	97.1667
436	97.2311	97.2288	97.2321	97.2307	97.2292	97.2283	97.2248	97.2227	97.2214	97.2198	97.2168	97.2127	97.2051
437	97.2684	97.2661	97.2695	97.2682	97.2667	97.2659	97.2624	97.2603	97.2591	97.2577	97.2547	97.2507	97.243
438	97.3052	97.303	97.3065	97.3053	97.3038	97.3031	97.2996	97.2976	97.2964	97.295	97.2921	97.2882	97.2805
439	97.3417	97.3395	97.3432	97.3419	97.3405	97.3398	97.3364	97.3344	97.3333	97.332	97.3292	97.3252	97.3176
440	97.3777	97.3756	97.3794	97.3782	97.3768	97.3762	97.3728	97.3708	97.3698	97.3686	97.3658	97.3619	97.3542
441	97.4134	97.4112	97.4152	97.414	97.4127	97.4121	97.4087	97.4068	97.4059	97.4047	97.402	97.3981	97.3905
442	97.4487	97.4465	97.4506	97.4495	97.4482	97.4477	97.4443	97.4424	97.4415	97.4404	97.4377	97.4339	97.4263
443	97.4835	97.4814	97.4856	97.4845	97.4833	97.4828	97.4794	97.4776	97.4768	97.4758	97.4731	97.4694	97.4616
444	97.518	97.5159	97.5203	97.5192	97.518	97.5176	97.5142	97.5124	97.5117	97.5107	97.5081	97.5044	97.4966
445	97.5522	97.5501	97.5546	97.5535	97.5524	97.552	97.5486	97.5469	97.5462	97.5453	97.5428	97.5391	97.5313
446	97.586	97.5838	97.5885	97.5875	97.5864	97.5861	97.5827	97.5809	97.5803	97.5795	97.577	97.5733	97.5655
447	97.6194	97.6173	97.622	97.6211	97.62	97.6197	97.6163	97.6146	97.6141	97.6134	97.6109	97.6072	97.5993
448	97.6524	97.6503	97.6552	97.6543	97.6533	97.6531	97.6496	97.648	97.6475	97.6468	97.6444	97.6407	97.6328
449	97.6851	97.683	97.6881	97.6872	97.6862	97.686	97.6826	97.681	97.6806	97.6799	97.6775	97.6739	97.6659
450	97.7175	97.7154	97.7206	97.7198	97.7188	97.7187	97.7152	97.7136	97.7133	97.7127	97.7103	97.7067	97.6987
451	97.7496	97.7475	97.7528	97.752	97.751	97.751	97.7475	97.7459	97.7456	97.7451	97.7428	97.7392	97.7311
452	97.7813	97.7792	97.7847	97.7839	97.783	97.7829	97.7795	97.7779	97.7777	97.7772	97.7749	97.7713	97.7631
453	97.8127	97.8106	97.8162	97.8154	97.8145	97.8146	97.8111	97.8096	97.8094	97.809	97.8067	97.8031	97.7949
454	97.8437	97.8416	97.8474	97.8467	97.8458	97.8459	97.8424	97.8409	97.8408	97.8404	97.8381	97.8346	97.8263
455	97.8745	97.8724	97.8783	97.8776	97.8768	97.8769	97.8734	97.8719	97.8718	97.8715	97.8693	97.8657	97.8573
456	97.9049	97.9028	97.9089	97.9082	97.9074	97.9076	97.904	97.9026	97.9025	97.9023	97.9001	97.8965	97.8881
457	97.9351	97.933	97.9392	97.9385	97.9377	97.9379	97.9344	97.9329	97.933	97.9328	97.9306	97.927	97.9185
458	97.9649	97.9628	97.9692	97.9685	97.9678	97.968	97.9644	97.963	97.9631	97.963	97.9608	97.9572	97.9486
459	97.9944	97.9923	97.9989	97.9982	97.9975	97.9978	97.9942	97.9928	97.9929	97.9928	97.9907	97.9871	97.9784
460	98.0237	98.0216	98.0282	98.0277	98.0269	98.0273	98.0237	98.0223	98.0225	98.0224	98.0203	98.0167	98.0079
461	98.0526	98.0505	98.0574	98.0568	98.0561	98.0565	98.0528	98.0515	98.0517	98.0517	98.0496	98.046	98.0371
462	98.0813	98.0792	98.0862	98.0856	98.085	98.0854	98.0817	98.0804	98.0807	98.0807	98.0786	98.075	98.066
463	98.1097	98.1076	98.1147	98.1142	98.1136	98.114	98.1103	98.109	98.1093	98.1094	98.1073	98.1038	98.0947
464	98.1378	98.1357	98.143	98.1425	98.1419	98.1424	98.1387	98.1373	98.1377	98.1379	98.1358	98.1322	98.123
465	98.1657	98.1635	98.171	98.1705	98.1699	98.1705	98.1667	98.1654	98.1659	98.166	98.1639	98.1604	98.1511
466	98.1933	98.1911	98.1987	98.1983	98.1977	98.1983	98.1945	98.1932	98.1937	98.1939	98.1919	98.1883	98.1788
467	98.2206	98.2184	98.2262	98.2258	98.2252	98.2258	98.222	98.2208	98.2213	98.2216	98.2195	98.2159	98.2064
468	98.2476	98.2455	98.2534	98.253	98.2525	98.2531	98.2493	98.248	98.2486	98.2489	98.2469	98.2433	98.2336
469	98.2744	98.2722	98.2804	98.28	98.2795	98.2802	98.2763	98.275	98.2757	98.276	98.274	98.2704	98.2606
470	98.301	98.2988	98.3071	98.3067	98.3062	98.307	98.303	98.3018	98.3025	98.3029	98.3009	98.2972	98.2873
471	98.3273	98.3251	98.3335	98.3332	98.3327	98.3335	98.3296	98.3283	98.3291	98.3295	98.3275	98.3238	98.3138
472	98.3533	98.3511	98.3597	98.3594	98.3589	98.3598	98.3558	98.3546	98.3554	98.3559	98.3538	98.3502	98.34
473	98.3792	98.3769	98.3857	98.3854	98.385	98.3859	98.3818	98.3806	98.3815	98.382	98.38	98.3763	98.366
474	98.4047	98.4025	98.4114	98.4112	98.4107	98.4117	98.4076	98.4064	98.4074	98.4079	98.4058	98.4021	98.3917
475	98.4301	98.4278	98.4369	98.4367	98.4363	98.4372	98.4331	98.432	98.433	98.4335	98.4315	98.4278	98.4172
476	98.4552	98.4529	98.4622	98.4619	98.4616	98.4626	98.4584	98.4573	98.4583	98.4589	98.4569	98.4531	98.4425
477	98.48	98.4777	98.4872	98.487	98.4866	98.4877	98.4835	98.4824	98.4835	98.4841	98.4821	98.4783	98.4675
478	98.5047	98.5024	98.512	98.5118	98.5115	98.5126	98.5084	98.5072	98.5084	98.509	98.507	98.5032	98.4923
479	98.5291	98.5268	98.5366	98.5364	98.5361	98.5373	98.533	98.5318	98.5331	98.5338	98.5317	98.5279	98.5169
480	98.5533	98.5509	98.561	98.5608	98.5605	98.5617	98.5574	98.5563	98.5576	98.5583	98.5563	98.5524	98.5412
