# Supplementary material for: Design, characterization, and modeling of microcirculation systems with integrated oxygenators
Source: Copernicus journal article supplement (doi:10.5194/jsss-5-221-2016), 2016-06-24
Supplement: Supplementary file 7 [file Vergleich-Model-Messwerte.xls]

## Sheet: 27.01.16-Vorversuch
t	modelled	measured	Startwert	Quadr. Abw.	Mittelwert	t
s	%	-	%	-	-	min
1	3.48289e-09	23.1	23.1	1.21305e-17	3.02475	0.0166667
1	3.48292e-09	23.1	23.1	1.21307e-17		0.0166667
1	3.48294e-09	23.1	23.1	1.21309e-17		0.0166667
1	3.48298e-09	23.1	23.1	1.21311e-17		0.0166667
1	3.483e-09	23.1	23.1	1.21313e-17		0.0166667
1.00001	3.48303e-09	23.1	23.1	1.21315e-17		0.0166668
1.00001	3.48307e-09	23.1	23.1	1.21318e-17		0.0166668
1.00001	3.4831e-09	23.1	23.1	1.2132e-17		0.0166668
1.00001	3.48313e-09	23.1	23.1	1.21322e-17		0.0166668
1.00001	3.48318e-09	23.1	23.1	1.21325e-17		0.0166669
1.00001	3.48323e-09	23.1	23.1	1.21329e-17		0.0166669
1.00002	3.48329e-09	23.1	23.1	1.21333e-17		0.0166669
1.00002	3.48338e-09	23.1	23.1	1.21339e-17		0.016667
1.00002	3.48348e-09	23.1	23.1	1.21346e-17		0.016667
1.00003	3.48361e-09	23.1	23.1	1.21355e-17		0.0166671
1.00003	3.48377e-09	23.1	23.1	1.21366e-17		0.0166672
1.00004	3.48397e-09	23.1	23.1	1.2138e-17		0.0166674
1.00005	3.48422e-09	23.1	23.1	1.21397e-17		0.0166675
1.00006	3.48453e-09	23.1	23.1	1.21419e-17		0.0166677
1.00008	3.48492e-09	23.1	23.1	1.21446e-17		0.016668
1.00008	3.48496e-09	23.1	23.1	1.2145e-17		0.016668
1.00009	3.48528e-09	23.1	23.1	1.21471e-17		0.0166682
1.00018	3.48746e-09	23.1	23.1	1.21624e-17		0.0166696
1.00077	3.50281e-09	23.1	23.1	1.22697e-17		0.0166795
1.00491	3.61188e-09	23.1	23.1	1.30457e-17		0.0167485
1.03388	4.45971e-09	23.1	23.1	1.98891e-17		0.0172314
1.13388	8.8125e-09	23.1	23.1	7.76601e-17		0.0188981
1.23388	1.63519e-08	23.1	23.1	2.67385e-16		0.0205647
1.33388	2.87796e-08	23.1	23.1	8.28263e-16		0.0222314
1.43388	4.84141e-08	23.1	23.1	2.34392e-15		0.0238981
1.53388	7.83653e-08	23.1	23.1	6.14112e-15		0.0255647
1.63388	1.22693e-07	23.1	23.1	1.50537e-14		0.0272314
1.73388	1.86672e-07	23.1	23.1	3.48465e-14		0.0288981
1.83388	2.77019e-07	23.1	23.1	7.67396e-14		0.0305647
1.93388	4.02364e-07	23.1	23.1	1.61897e-13		0.0322314
2.03388	5.73781e-07	23.1	23.1	3.29224e-13		0.0338981
2.13388	8.05486e-07	23.1	23.1	6.48807e-13		0.0355647
2.23388	1.11574e-06	23.1	23.1	1.24488e-12		0.0372314
2.33388	1.52801e-06	23.1	23.1	2.3348e-12		0.0388981
2.43388	2.07235e-06	23.1	23.1	4.29462e-12		0.0405647
2.53388	2.78715e-06	23.1	23.1	7.76819e-12		0.0422314
2.63388	3.72112e-06	23.1	23.1	1.38467e-11		0.0438981
2.73388	4.9356e-06	23.1	23.1	2.43601e-11		0.0455647
2.83388	6.50714e-06	23.1	23.1	4.23429e-11		0.0472314
2.93388	8.53041e-06	23.1	23.1	7.27679e-11		0.0488981
3.03388	1.11213e-05	23.1	23.1	1.23683e-10		0.0505647
3.13388	1.44201e-05	23.1	23.1	2.07939e-10		0.0522314
3.23388	1.85952e-05	23.1	23.1	3.4578e-10		0.0538981
3.33388	2.38462e-05	23.1	23.1	5.6864e-10		0.0555647
3.43388	3.04077e-05	23.1	23.1	9.24629e-10		0.0572314
3.53388	3.85527e-05	23.1	23.1	1.48631e-09		0.0588981
3.63388	4.85958e-05	23.1	23.1	2.36155e-09		0.0605647
3.73388	6.08962e-05	23.1	23.1001	3.70835e-09		0.0622314
3.83388	7.58606e-05	23.1	23.1001	5.75483e-09		0.0638981
3.93388	9.39455e-05	23.1	23.1001	8.82575e-09		0.0655647
4.03388	0.000115659	23.1	23.1001	1.33771e-08		0.0672314
4.13388	0.000141564	23.1	23.1001	2.00404e-08		0.0688981
4.23388	0.000172276	23.1	23.1002	2.9679e-08		0.0705647
4.33388	0.000208467	23.1	23.1002	4.34584e-08		0.0722314
4.43388	0.000250863	23.1	23.1003	6.29323e-08		0.0738981
4.53388	0.000300246	23.1	23.1003	1.19546e-07		0.0755647
4.63388	0.00035745	23.0993	23.1004	1.20691e-06		0.0772314
4.73388	0.000423361	23.0976	23.1004	7.70939e-06		0.0788981
4.83388	0.000498917	23.095	23.1005	2.99376e-05		0.0805647
4.93388	0.000585101	23.0913	23.1006	8.56647e-05		0.0822314
5.03388	0.00068294	23.0865	23.1007	0.000200826		0.0838981
5.13388	0.000793503	23.0806	23.1008	0.000409088		0.0855647
5.23388	0.000917895	23.0735	23.1009	0.000750203		0.0872314
5.33388	0.00105726	23.0655	23.1011	0.00126747		0.0888981
5.43388	0.00121275	23.0564	23.1012	0.00200496		0.0905647
5.53388	0.00138557	23.0467	23.1014	0.0029952		0.0922314
5.63388	0.00157693	23.0374	23.1016	0.00412474		0.0938981
5.73388	0.00178805	23.029	23.1018	0.00530321		0.0955647
5.83388	0.00202017	23.0216	23.102	0.00646993		0.0972314
5.93388	0.00227452	23.0153	23.1023	0.00756768		0.0988981
6.03388	0.00255235	23.0101	23.1026	0.00854743		0.100565
6.13388	0.0028549	23.006	23.1029	0.00937234		0.102231
6.23388	0.00318339	23.0031	23.1032	0.01002		0.103898
6.33388	0.00353905	23.0012	23.1035	0.0104823		0.105565
6.43388	0.00392306	23.0002	23.1039	0.0107635		0.107231
6.53388	0.00433662	23	23.1043	0.0108861		0.108898
6.63388	0.00478086	23	23.1048	0.010979		0.110565
6.73388	0.00525694	23	23.1053	0.011079		0.112231
6.83388	0.00576593	23	23.1058	0.0111864		0.113898
6.93388	0.00630892	23	23.1063	0.0113016		0.115565
7.03388	0.00688692	23	23.1069	0.0114248		0.117231
7.13388	0.00750094	23	23.1075	0.0115565		0.118898
7.23388	0.00815194	23	23.1082	0.0116968		0.120565
7.33388	0.00884083	23	23.1088	0.0118463		0.122231
7.43388	0.00956849	23	23.1096	0.0120053		0.123898
7.53388	0.0103358	23	23.1103	0.012174		0.125565
7.63388	0.0111434	23	23.1111	0.0123529		0.127231
7.73388	0.0119923	23	23.112	0.0125423		0.128898
7.83388	0.012883	23	23.1129	0.0127426		0.130565
7.93388	0.0138162	23	23.1138	0.0129541		0.132231
8.03388	0.0147927	23	23.1148	0.0131774		0.133898
8.13388	0.0158129	23	23.1158	0.0134126		0.135565
8.23388	0.0168774	23	23.1169	0.0136603		0.137231
8.33388	0.0179868	23	23.118	0.0139209		0.138898
8.43388	0.0191414	23	23.1191	0.0141947		0.140565
8.53388	0.0203419	23	23.1203	0.0144931		0.142231
8.63388	0.0215885	22.9993	23.1216	0.0149645		0.143898
8.73388	0.0228817	22.9976	23.1229	0.0156838		0.145565
8.83388	0.0242218	22.995	23.1242	0.0166912		0.147231
8.93388	0.0256091	22.9913	23.1256	0.018031		0.148898
9.03388	0.027044	22.9865	23.127	0.0197493		0.150565
9.13388	0.0285266	22.9806	23.1285	0.0218919		0.152231
9.23388	0.0300573	22.9735	23.1301	0.0245014		0.153898
9.33388	0.0316362	22.9655	23.1316	0.027616		0.155565
9.43388	0.0332636	22.9564	23.1333	0.031268		0.157231
9.53388	0.0349396	22.9467	23.1349	0.0354402		0.158898
9.63388	0.0366645	22.9378	23.1367	0.0395351		0.160565
9.73388	0.0384382	22.9306	23.1384	0.0431853		0.162231
9.83388	0.040261	22.9254	23.1403	0.0461576		0.163898
9.93388	0.0421331	22.9225	23.1421	0.048235		0.165565
10.0339	0.0440544	22.9221	23.1441	0.0492647		0.167231
10.1339	0.0460251	22.9242	23.146	0.0491991		0.168898
10.2339	0.0480453	22.9287	23.148	0.048106		0.170565
10.3339	0.050115	22.9353	23.1501	0.0461404		0.172231
10.4339	0.0522343	22.9437	23.1522	0.043499		0.173898
10.5339	0.0544033	22.9533	23.1544	0.040436		0.175565
10.6339	0.0566219	22.9622	23.1566	0.0378116		0.177231
10.7339	0.0588903	22.9694	23.1589	0.035917		0.178898
10.8339	0.0612085	22.9746	23.1612	0.0348294		0.180565
10.9339	0.0635765	22.9775	23.1636	0.0346276		0.182231
11.0339	0.0659943	22.9779	23.166	0.0353787		0.183898
11.1339	0.0684619	22.9758	23.1685	0.0371249		0.185565
11.2339	0.0709794	22.9713	23.171	0.0398776		0.187231
11.3339	0.0735467	22.9647	23.1735	0.0436219		0.188898
11.4339	0.0761639	22.9563	23.1762	0.048327		0.190565
11.5339	0.0788309	22.9467	23.1788	0.0538922		0.192231
11.6339	0.0815477	22.9378	23.1815	0.0593982		0.193898
11.7339	0.0843143	22.9306	23.1843	0.064357		0.195565
11.8339	0.0871308	22.9254	23.1871	0.0684937		0.197231
11.9339	0.0899969	22.9225	23.19	0.0715501		0.198898
12.0339	0.0929128	22.9221	23.1929	0.0733407		0.200565
12.1339	0.0958784	22.9242	23.1959	0.0738003		0.202231
12.2339	0.0988936	22.9287	23.1989	0.0729968		0.203898
12.3339	0.101958	22.9353	23.202	0.0711004		0.205565
12.4339	0.105073	22.9437	23.2051	0.0683312		0.207231
12.5339	0.108236	22.9533	23.2082	0.0649844		0.208898
12.6339	0.11145	22.9622	23.2114	0.0621404		0.210565
12.7339	0.114712	22.9694	23.2147	0.0601915		0.212231
12.8339	0.118024	22.9746	23.218	0.0592637		0.213898
12.9339	0.121384	22.9775	23.2214	0.0594836		0.215565
13.0339	0.124794	22.9779	23.2248	0.0609557		0.217231
13.1339	0.128253	22.9758	23.2283	0.0637406		0.218898
13.2339	0.13176	22.9713	23.2318	0.067847		0.220565
13.3339	0.135316	22.9647	23.2353	0.0732395		0.222231
13.4339	0.138921	22.9563	23.2389	0.0798576		0.223898
13.5339	0.142573	22.9466	23.2426	0.0875934		0.225565
13.6339	0.146275	22.9366	23.2463	0.0958911		0.227231
13.7339	0.150024	22.9266	23.25	0.104595		0.228898
13.8339	0.15382	22.9166	23.2538	0.11371		0.230565
13.9339	0.157665	22.9066	23.2577	0.123238		0.232231
14.0339	0.161557	22.8966	23.2616	0.133185		0.233898
14.1339	0.165496	22.8866	23.2655	0.143553		0.235565
14.2339	0.169482	22.8766	23.2695	0.154347		0.237231
14.3339	0.173515	22.8666	23.2735	0.165571		0.238898
14.4339	0.177595	22.8566	23.2776	0.177227		0.240565
14.5339	0.181721	22.8467	23.2817	0.189257		0.242231
14.6339	0.185893	22.8378	23.2859	0.20076		0.243898
14.7339	0.190111	22.8306	23.2901	0.211125		0.245565
14.8339	0.194374	22.8254	23.2944	0.21992		0.247231
14.9339	0.198682	22.8225	23.2987	0.226742		0.248898
15.0339	0.203036	22.8221	23.303	0.231301		0.250565
15.1339	0.207434	22.8242	23.3074	0.233499		0.252231
15.2339	0.211876	22.8287	23.3119	0.233445		0.253898
15.3339	0.216363	22.8353	23.3164	0.23141		0.255565
15.4339	0.220893	22.8437	23.3209	0.227741		0.257231
15.5339	0.225466	22.8533	23.3255	0.222926		0.258898
15.6339	0.230083	22.8622	23.3301	0.218943		0.260565
15.7339	0.234742	22.8694	23.3347	0.216569		0.262231
15.8339	0.239443	22.8746	23.3394	0.216096		0.263898
15.9339	0.244187	22.8775	23.3442	0.217804		0.265565
16.0339	0.248972	22.8779	23.349	0.221907		0.267231
16.1339	0.253798	22.8758	23.3538	0.228498		0.268898
16.2339	0.258666	22.8713	23.3587	0.237539		0.270565
16.3339	0.263573	22.8647	23.3636	0.248886		0.272231
16.4339	0.268521	22.8563	23.3685	0.26234		0.273898
16.5339	0.273509	22.8467	23.3735	0.277572		0.275565
16.6339	0.278535	22.8374	23.3785	0.292879		0.277231
16.7339	0.283601	22.829	23.3836	0.307622		0.278898
16.8339	0.288706	22.8216	23.3887	0.321627		0.280565
16.9339	0.293848	22.8153	23.3938	0.334739		0.282231
17.0339	0.299028	22.8101	23.399	0.346836		0.283898
17.1339	0.304246	22.806	23.4042	0.357845		0.285565
17.2339	0.3095	22.8031	23.4095	0.367741		0.287231
17.3339	0.314791	22.8012	23.4148	0.376548		0.288898
17.4339	0.320118	22.8002	23.4201	0.384328		0.290565
17.5339	0.32548	22.8	23.4255	0.391226		0.292231
17.6339	0.330878	22.8	23.4309	0.398007		0.293898
17.7339	0.336311	22.8	23.4363	0.404892		0.295565
17.8339	0.341778	22.8	23.4418	0.411879		0.297231
17.9339	0.347279	22.8	23.4473	0.418971		0.298898
18.0339	0.352814	22.8	23.4528	0.426166		0.300565
18.1339	0.358382	22.8	23.4584	0.433467		0.302231
18.2339	0.363983	22.8	23.464	0.440873		0.303898
18.3339	0.369616	22.8	23.4696	0.448386		0.305565
18.4339	0.375281	22.8	23.4753	0.456005		0.307231
18.5339	0.380978	22.8	23.481	0.463731		0.308898
18.6339	0.386706	22.8	23.4867	0.471565		0.310565
18.7339	0.392464	22.8	23.4925	0.479507		0.312231
18.8339	0.398253	22.8	23.4983	0.487557		0.313898
18.9339	0.404072	22.8	23.5041	0.495717		0.315565
19.0339	0.40992	22.8	23.5099	0.503986		0.317231
19.1339	0.415797	22.8	23.5158	0.512366		0.318898
19.2339	0.421704	22.8	23.5217	0.520856		0.320565
19.3339	0.427638	22.8	23.5276	0.529457		0.322231
19.4339	0.433601	22.8	23.5336	0.53817		0.323898
19.5339	0.439591	22.8	23.5396	0.546994		0.325565
19.6339	0.445608	22.8	23.5456	0.555931		0.327231
19.7339	0.451652	22.8	23.5517	0.56498		0.328898
19.8339	0.457722	22.8	23.5577	0.574143		0.330565
19.9339	0.463819	22.8	23.5638	0.583419		0.332231
20.0339	0.469941	22.8	23.5699	0.592809		0.333898
20.1339	0.476088	22.8	23.5761	0.602313		0.335565
20.2339	0.482261	22.8	23.5823	0.611932		0.337231
20.3339	0.488457	22.8	23.5885	0.621665		0.338898
20.4339	0.494679	22.8	23.5947	0.631514		0.340565
20.5339	0.500923	22.8	23.6009	0.641406		0.342231
20.6339	0.507192	22.8007	23.6072	0.650363		0.343898
20.7339	0.513484	22.8024	23.6135	0.657932		0.345565
20.8339	0.519798	22.805	23.6198	0.66394		0.347231
20.9339	0.526135	22.8087	23.6261	0.668248		0.348898
21.0339	0.532494	22.8135	23.6325	0.67077		0.350565
21.1339	0.538874	22.8194	23.6389	0.671485		0.352231
21.2339	0.545276	22.8265	23.6453	0.670441		0.353898
21.3339	0.551699	22.8345	23.6517	0.667742		0.355565
21.4339	0.558143	22.8436	23.6581	0.66354		0.357231
21.5339	0.564608	22.8533	23.6646	0.658194		0.358898
21.6339	0.571092	22.8622	23.6711	0.654355		0.360565
21.7339	0.577596	22.8694	23.6776	0.653226		0.362231
21.8339	0.58412	22.8746	23.6841	0.655352		0.363898
21.9339	0.590663	22.8775	23.6907	0.661247		0.365565
22.0339	0.597225	22.8779	23.6972	0.671289		0.367231
22.1339	0.603805	22.8758	23.7038	0.685619		0.368898
22.2339	0.610403	22.8713	23.7104	0.704118		0.370565
22.3339	0.617019	22.8647	23.717	0.726468		0.372231
22.4339	0.623653	22.8563	23.7237	0.75225		0.373898
22.5339	0.630304	22.8467	23.7303	0.780833		0.375565
22.6339	0.636973	22.8374	23.737	0.809316		0.377231
22.7339	0.643658	22.829	23.7437	0.836663		0.378898
22.8339	0.650359	22.8216	23.7504	0.862622		0.380565
22.9339	0.657076	22.8153	23.7571	0.886977		0.382231
23.0339	0.66381	22.8101	23.7638	0.909562		0.383898
23.1339	0.670559	22.806	23.7706	0.930288		0.385565
23.2339	0.677323	22.8031	23.7773	0.949142		0.387231
23.3339	0.684102	22.8012	23.7841	0.966183		0.388898
23.4339	0.690896	22.8002	23.7909	0.981526		0.390565
23.5339	0.697704	22.8	23.7977	0.995413		0.392231
23.6339	0.704526	22.8	23.8045	1.00907		0.393898
23.7339	0.711363	22.8	23.8114	1.02285		0.395565
23.8339	0.718213	22.8	23.8182	1.03676		0.397231
23.9339	0.725076	22.8	23.8251	1.05078		0.398898
24.0339	0.731953	22.8	23.832	1.06493		0.400565
24.1339	0.738842	22.8	23.8388	1.07919		0.402231
24.2339	0.745744	22.8	23.8457	1.09358		0.403898
24.3339	0.752658	22.8	23.8527	1.10809		0.405565
24.4339	0.759584	22.8	23.8596	1.12272		0.407231
24.5339	0.766523	22.8	23.8665	1.13737		0.408898
24.6339	0.773472	22.8007	23.8735	1.15075		0.410565
24.7339	0.780433	22.8024	23.8804	1.16226		0.412231
24.8339	0.787405	22.805	23.8874	1.17166		0.413898
24.9339	0.794388	22.8087	23.8944	1.17878		0.415565
25.0339	0.801382	22.8135	23.9014	1.18351		0.417231
25.1339	0.808385	22.8194	23.9084	1.18582		0.418898
25.2339	0.815399	22.8265	23.9154	1.18576		0.420565
25.3339	0.822423	22.8345	23.9224	1.18348		0.422231
25.4339	0.829457	22.8436	23.9295	1.17916		0.423898
25.5339	0.836499	22.8534	23.9365	1.17313		0.425565
25.6339	0.843551	22.8634	23.9436	1.16675		0.427231
25.7339	0.850612	22.8734	23.9506	1.16041		0.428898
25.8339	0.857682	22.8834	23.9577	1.15411		0.430565
25.9339	0.86476	22.8934	23.9648	1.14784		0.432231
26.0339	0.871846	22.9034	23.9718	1.1416		0.433898
26.1339	0.878941	22.9134	23.9789	1.1354		0.435565
26.2339	0.886043	22.9234	23.986	1.12924		0.437231
26.3339	0.893153	22.9334	23.9932	1.1231		0.438898
26.4339	0.90027	22.9434	24.0003	1.117		0.440565
26.5339	0.907395	22.9533	24.0074	1.11103		0.442231
26.6339	0.914526	22.9626	24.0145	1.10645		0.443898
26.7339	0.921664	22.971	24.0217	1.10382		0.445565
26.8339	0.928809	22.9784	24.0288	1.10333		0.447231
26.9339	0.93596	22.9847	24.036	1.10511		0.448898
27.0339	0.943117	22.9899	24.0431	1.10927		0.450565
27.1339	0.950281	22.994	24.0503	1.11582		0.452231
27.2339	0.95745	22.9969	24.0574	1.12473		0.453898
27.3339	0.964624	22.9988	24.0646	1.13589		0.455565
27.4339	0.971804	22.9998	24.0718	1.14914		0.457231
27.5339	0.978989	23	24.079	1.16412		0.458898
27.6339	0.986179	23.0007	24.0862	1.17817		0.460565
27.7339	0.993373	23.0024	24.0934	1.19033		0.462231
27.8339	1.00057	23.005	24.1006	1.20034		0.463898
27.9339	1.00778	23.0087	24.1078	1.20803		0.465565
28.0339	1.01498	23.0135	24.115	1.21329		0.467231
28.1339	1.0222	23.0194	24.1222	1.21609		0.468898
28.2339	1.02941	23.0265	24.1294	1.21648		0.470565
28.3339	1.03663	23.0345	24.1366	1.2146		0.472231
28.4339	1.04385	23.0436	24.1439	1.21064		0.473898
28.5339	1.05108	23.0533	24.1511	1.20503		0.475565
28.6339	1.05831	23.0626	24.1583	1.20048		0.477231
28.7339	1.06554	23.071	24.1655	1.19795		0.478898
28.8339	1.07278	23.0784	24.1728	1.19763		0.480565
28.9339	1.08002	23.0847	24.18	1.19968		0.482231
29.0339	1.08726	23.0899	24.1873	1.20419		0.483898
29.1339	1.0945	23.094	24.1945	1.21119		0.485565
29.2339	1.10174	23.0969	24.2017	1.22064		0.487231
29.3339	1.10899	23.0988	24.209	1.23242		0.488898
29.4339	1.11624	23.0998	24.2162	1.24638		0.490565
29.5339	1.12349	23.1001	24.2235	1.26206		0.492231
29.6339	1.13074	23.1012	24.2307	1.27582		0.493898
29.7339	1.13799	23.104	24.238	1.2859		0.495565
29.8339	1.14525	23.1088	24.2452	1.2915		0.497231
29.9339	1.1525	23.1159	24.2525	1.29187		0.498898
30	1.1573	23.122	24.2573	1.28901		0.5
30	1.1573	23.122	24.2573	1.28901		0.5
30	1.1573	23.122	24.2573	1.28901		0.5
30.0001	1.15731	23.122	24.2573	1.28901		0.500002
30.0008	1.15736	23.122	24.2574	1.28896		0.500014
30.0059	1.15772	23.1225	24.2577	1.28864		0.500098
30.0411	1.16028	23.1263	24.2603	1.28596		0.500685
30.1411	1.16756	23.1386	24.2676	1.2746		0.502352
30.2411	1.17489	23.1532	24.2749	1.25811		0.504019
30.3411	1.18233	23.17	24.2823	1.23733		0.505685
30.4411	1.18986	23.1884	24.2899	1.21311		0.507352
30.5411	1.19753	23.2082	24.2975	1.18675		0.509019
30.6411	1.20542	23.2274	24.3054	1.16214		0.510685
30.7411	1.2136	23.2457	24.3136	1.14037		0.512352
30.8411	1.22209	23.263	24.3221	1.12164		0.514019
30.9411	1.23098	23.2792	24.331	1.10615		0.515685
31.0411	1.24033	23.2943	24.3403	1.09408		0.517352
31.1411	1.25021	23.3083	24.3502	1.08554		0.519019
31.2411	1.2607	23.3212	24.3607	1.08055		0.520685
31.3411	1.27186	23.3331	24.3719	1.07911		0.522352
31.4411	1.28375	23.344	24.3838	1.08115		0.524019
31.5411	1.29644	23.3542	24.3964	1.08623		0.525685
31.6411	1.30998	23.3655	24.41	1.09101		0.527352
31.7411	1.32443	23.3784	24.4244	1.09417		0.529019
31.8411	1.33983	23.3934	24.4398	1.09512		0.530685
31.9411	1.35623	23.4106	24.4562	1.0933		0.532352
32.0411	1.37367	23.4304	24.4737	1.08843		0.534019
32.1411	1.39218	23.4527	24.4922	1.08055		0.535685
32.2411	1.41181	23.4773	24.5118	1.07011		0.537352
32.3411	1.43257	23.5041	24.5326	1.05778		0.539019
32.4411	1.4545	23.5326	24.5545	1.04436		0.540685
32.5411	1.4776	23.5623	24.5776	1.03091		0.542352
32.6411	1.50191	23.5915	24.6019	1.02091		0.544019
32.7411	1.52743	23.6198	24.6274	1.01527		0.545685
32.8411	1.55417	23.6471	24.6542	1.01413		0.547352
32.9411	1.58214	23.6734	24.6821	1.01764		0.549019
33.0411	1.61133	23.6985	24.7113	1.02592		0.550685
33.1411	1.64176	23.7224	24.7418	1.03903		0.552352
33.2411	1.67341	23.7453	24.7734	1.05698		0.554019
33.3411	1.70628	23.7672	24.8063	1.07975		0.555685
33.4411	1.74036	23.7881	24.8404	1.10728		0.557352
33.5411	1.77564	23.8083	24.8756	1.13923		0.559019
33.6411	1.8121	23.829	24.9121	1.173		0.560685
33.7411	1.84974	23.8507	24.9497	1.20782		0.562352
33.8411	1.88853	23.8734	24.9885	1.24346		0.564019
33.9411	1.92846	23.8972	25.0285	1.27975		0.565685
34.0411	1.96951	23.9221	25.0695	1.31654		0.567352
34.1411	2.01165	23.9481	25.1117	1.35379		0.569019
34.2411	2.05487	23.9752	25.1549	1.39152		0.570685
34.3411	2.09914	24.0034	25.1991	1.42983		0.572352
34.4411	2.14444	24.0325	25.2444	1.46887		0.574019
34.5411	2.19074	24.0624	25.2907	1.50882		0.575685
34.6411	2.23802	24.0932	25.338	1.54968		0.577352
34.7411	2.28626	24.1248	25.3863	1.59117		0.579019
34.8411	2.33542	24.1575	25.4354	1.63298		0.580685
34.9411	2.38548	24.1913	25.4855	1.67487		0.582352
35.0411	2.43643	24.2262	25.5364	1.71665		0.584019
35.1411	2.48822	24.2622	25.5882	1.75822		0.585685
35.2411	2.54083	24.2994	25.6408	1.79956		0.587352
35.3411	2.59425	24.3375	25.6943	1.84077		0.589019
35.4411	2.64844	24.3766	25.7484	1.88199		0.590685
35.5411	2.70338	24.4165	25.8034	1.92341		0.592352
35.6411	2.75905	24.4573	25.859	1.96498		0.594019
35.7411	2.81541	24.499	25.9154	2.00636		0.595685
35.8411	2.87246	24.5416	25.9725	2.04721		0.597352
35.9411	2.93016	24.5854	26.0302	2.08724		0.599019
36.0411	2.98848	24.6303	26.0885	2.12622		0.600685
36.1411	3.04742	24.6764	26.1474	2.16405		0.602352
36.2411	3.10695	24.7235	26.2069	2.20072		0.604019
36.3411	3.16704	24.7716	26.267	2.23631		0.605685
36.4411	3.22768	24.8207	26.3277	2.27101		0.607352
36.5411	3.28885	24.8706	26.3889	2.30522		0.609019
36.6411	3.35053	24.9206	26.4505	2.34082		0.610685
36.7411	3.4127	24.9706	26.5127	2.3782		0.612352
36.8411	3.47534	25.0206	26.5753	2.41736		0.614019
36.9411	3.53844	25.0706	26.6384	2.45826		0.615685
37.0411	3.60198	25.1206	26.702	2.50091		0.617352
37.1411	3.66595	25.1706	26.766	2.54528		0.619019
37.2411	3.73033	25.2206	26.8303	2.59136		0.620685
37.3411	3.7951	25.2706	26.8951	2.63915		0.622352
37.4411	3.86026	25.3206	26.9603	2.68864		0.624019
37.5411	3.92579	25.3706	27.0258	2.73981		0.625685
37.6411	3.99169	25.4206	27.0917	2.79267		0.627352
37.7411	4.05792	25.4706	27.1579	2.84721		0.629019
37.8411	4.1245	25.5206	27.2245	2.90342		0.630685
37.9411	4.19141	25.5706	27.2914	2.96132		0.632352
38.0411	4.25863	25.6206	27.3586	3.02089		0.634019
38.1411	4.32616	25.6706	27.4262	3.08213		0.635685
38.2411	4.39399	25.7206	27.494	3.14505		0.637352
38.3411	4.46211	25.7706	27.5621	3.20966		0.639019
38.4411	4.53052	25.8206	27.6305	3.27595		0.640685
38.5411	4.5992	25.8706	27.6992	3.34369		0.642352
38.6411	4.66816	25.9214	27.7682	3.41057		0.644019
38.7411	4.73738	25.9731	27.8374	3.47566		0.645685
38.8411	4.80685	26.0258	27.9069	3.53852		0.647352
38.9411	4.87659	26.0795	27.9766	3.59879		0.649019
39.0411	4.94657	26.1344	28.0466	3.65623		0.650685
39.1411	5.01679	26.1905	28.1168	3.71073		0.652352
39.2411	5.08725	26.2476	28.1873	3.76232		0.654019
39.3411	5.15795	26.3057	28.2579	3.81117		0.655685
39.4411	5.22887	26.3648	28.3289	3.85755		0.657352
39.5411	5.30003	26.4247	28.4	3.90203		0.659019
39.6411	5.3714	26.4847	28.4714	3.94711		0.660685
39.7411	5.443	26.5447	28.543	3.99332		0.662352
39.8411	5.51481	26.6047	28.6148	4.04067		0.664019
39.9411	5.58684	26.6647	28.6868	4.08917		0.665685
40.0411	5.65908	26.7247	28.7591	4.13881		0.667352
40.1411	5.73152	26.7847	28.8315	4.18961		0.669019
40.2411	5.80418	26.8447	28.9042	4.24157		0.670685
40.3411	5.87703	26.9047	28.977	4.29469		0.672352
40.4411	5.95009	26.9647	29.0501	4.34898		0.674019
40.5411	6.02335	27.0247	29.1233	4.40417		0.675685
40.6411	6.0968	27.0855	29.1968	4.45761		0.677352
40.7411	6.17045	27.1472	29.2704	4.50829		0.679019
40.8411	6.24429	27.2099	29.3443	4.55575		0.680685
40.9411	6.31832	27.2736	29.4183	4.59963		0.682352
41.0411	6.39255	27.3385	29.4925	4.6397		0.684019
41.1411	6.46695	27.4046	29.567	4.67588		0.685685
41.2411	6.54155	27.4717	29.6415	4.70828		0.687352
41.3411	6.61632	27.5398	29.7163	4.7371		0.689019
41.4411	6.69128	27.6089	29.7913	4.7627		0.690685
41.5411	6.76642	27.6788	29.8664	4.78576		0.692352
41.6411	6.84173	27.7488	29.9417	4.80903		0.694019
41.7411	6.91722	27.8188	30.0172	4.83314		0.695685
41.8411	6.99288	27.8888	30.0929	4.85807		0.697352
41.9411	7.06872	27.9588	30.1687	4.88382		0.699019
42.0411	7.14472	28.0288	30.2447	4.91038		0.700685
42.1411	7.22089	28.0988	30.3209	4.93777		0.702352
42.2411	7.29722	28.1688	30.3972	4.96596		0.704019
42.3411	7.37372	28.2388	30.4737	4.99496		0.705685
42.4411	7.45038	28.3088	30.5504	5.02477		0.707352
42.5411	7.5272	28.3788	30.6272	5.05507		0.709019
42.6411	7.60417	28.4496	30.7042	5.08306		0.710685
42.7411	7.6813	28.5213	30.7813	5.10764		0.712352
42.8411	7.75857	28.594	30.8586	5.12837		0.714019
42.9411	7.836	28.6678	30.936	5.14491		0.715685
43.0411	7.91358	28.7427	31.0136	5.15705		0.717352
43.1411	7.99129	28.8187	31.0913	5.16474		0.719019
43.2411	8.06915	28.8958	31.1692	5.16812		0.720685
43.3411	8.14715	28.9739	31.2472	5.16746		0.722352
43.4411	8.22529	29.053	31.3253	5.16315		0.724019
43.5411	8.30356	29.1328	31.4036	5.15622		0.725685
43.6411	8.38196	29.2121	31.482	5.1524		0.727352
43.7411	8.46048	29.2904	31.5605	5.15336		0.729019
43.8411	8.53914	29.3677	31.6391	5.15949		0.730685
43.9411	8.61792	29.4439	31.7179	5.1711		0.732352
44.0411	8.69681	29.519	31.7968	5.18839		0.734019
44.1411	8.77583	29.593	31.8758	5.21137		0.735685
44.2411	8.85496	29.6659	31.955	5.23993		0.737352
44.3411	8.9342	29.7377	32.0342	5.2738		0.739019
44.4411	9.01355	29.8086	32.1136	5.31261		0.740685
44.5411	9.09301	29.8788	32.193	5.35565		0.742352
44.6411	9.17257	29.9488	32.2726	5.4		0.744019
44.7411	9.25223	30.0188	32.3522	5.44499		0.745685
44.8411	9.33199	30.0888	32.432	5.49062		0.747352
44.9411	9.41184	30.1588	32.5118	5.53689		0.749019
45.0411	9.49179	30.2288	32.5918	5.58379		0.750685
45.1411	9.57182	30.2988	32.6718	5.63131		0.752352
45.2411	9.65194	30.3688	32.7519	5.67944		0.754019
45.3411	9.73214	30.4388	32.8321	5.72817		0.755685
45.4411	9.81242	30.5088	32.9124	5.77749		0.757352
45.5411	9.89278	30.5789	32.9928	5.82678		0.759019
45.6411	9.97321	30.6505	33.0732	5.86974		0.760685
45.7411	10.0537	30.7243	33.1537	5.90228		0.762352
45.8411	10.1343	30.801	33.2343	5.92084		0.764019
45.9411	10.2149	30.8815	33.3149	5.92181		0.765685
46.0411	10.2956	30.9661	33.3956	5.90276		0.767352
46.1411	10.3764	31.0549	33.4764	5.86356		0.769019
46.2411	10.4572	31.1476	33.5572	5.80647		0.770685
46.3411	10.5381	31.2433	33.6381	5.73509		0.772352
46.4411	10.619	31.3414	33.719	5.65314		0.774019
46.5411	10.7	31.441	33.8	5.56495		0.775685
46.6411	10.781	31.5393	33.881	5.48376		0.777352
46.7411	10.8621	31.6349	33.9621	5.41569		0.779019
46.8411	10.9432	31.7268	34.0432	5.36582		0.780685
46.9411	11.0243	31.8135	34.1243	5.34002		0.782352
47.0411	11.1055	31.894	34.2055	5.34286		0.784019
47.1411	11.1867	31.9684	34.2867	5.37478		0.785685
47.2411	11.268	32.0373	34.368	5.43186		0.787352
47.3411	11.3492	32.1023	34.4492	5.50827		0.789019
47.4411	11.4305	32.1644	34.5305	5.59872		0.790685
47.5411	11.5119	32.2248	34.6119	5.6981		0.792352
47.6411	11.5932	32.2863	34.6932	5.79298		0.794019
47.7411	11.6746	32.3501	34.7746	5.87784		0.795685
47.8411	11.7559	32.4169	34.8559	5.94894		0.797352
47.9411	11.8373	32.4873	34.9373	6.00249		0.799019
48.0411	11.9187	32.562	35.0187	6.03578		0.800685
48.1411	12.0002	32.6408	35.1002	6.04841		0.802352
48.2411	12.0816	32.7234	35.1816	6.04242		0.804019
48.3411	12.163	32.8092	35.263	6.02127		0.805685
48.4411	12.2444	32.8973	35.3444	5.98858		0.807352
48.5411	12.3259	32.987	35.4259	5.94801		0.809019
48.6411	12.4073	33.077	35.5073	5.90626		0.810685
48.7411	12.4887	33.167	35.5887	5.86465		0.812352
48.8411	12.5701	33.257	35.6701	5.82315		0.814019
48.9411	12.6515	33.347	35.7515	5.78177		0.815685
49.0411	12.7329	33.437	35.8329	5.74048		0.817352
49.1411	12.8143	33.527	35.9143	5.69929		0.819019
49.2411	12.8957	33.617	35.9957	5.65818		0.820685
49.3411	12.9771	33.707	36.0771	5.61715		0.822352
49.4411	13.0584	33.797	36.1584	5.57618		0.824019
49.5411	13.1397	33.8869	36.2397	5.53578		0.825685
49.6411	13.221	33.9756	36.321	5.50081		0.827352
49.7411	13.3023	34.0627	36.4023	5.47368		0.829019
49.8411	13.3836	34.1478	36.4836	5.45593		0.830685
49.9411	13.4648	34.2305	36.5648	5.4489		0.832352
50.0411	13.546	34.3107	36.646	5.45345		0.834019
50.1411	13.6272	34.3884	36.7272	5.46966		0.835685
50.2411	13.7083	34.4638	36.8083	5.49683		0.837352
50.3411	13.7894	34.537	36.8894	5.53367		0.839019
50.4411	13.8705	34.6086	36.9705	5.57867		0.840685
50.5411	13.9515	34.6789	37.0515	5.62936		0.842352
50.6411	14.0325	34.7501	37.1325	5.6757		0.844019
50.7411	14.1135	34.8231	37.2135	5.71403		0.845685
50.8411	14.1944	34.898	37.2944	5.74262		0.847352
50.9411	14.2753	34.9753	37.3753	5.75994		0.849019
51.0411	14.3561	35.0551	37.4561	5.76503		0.850685
51.1411	14.4369	35.1374	37.5369	5.75779		0.852352
51.2411	14.5176	35.222	37.6176	5.73901		0.854019
51.3411	14.5983	35.3088	37.6983	5.7101		0.855685
51.4411	14.679	35.3972	37.779	5.67276		0.857352
51.5411	14.7596	35.4869	37.8596	5.62943		0.859019
51.6411	14.8401	35.5762	37.9401	5.58823		0.860685
51.7411	14.9206	35.6645	38.0206	5.55129		0.862352
51.8411	15.001	35.7518	38.101	5.51897		0.864019
51.9411	15.0814	35.838	38.1814	5.49156		0.865685
52.0411	15.1618	35.9231	38.2618	5.4692		0.867352
52.1411	15.242	36.0071	38.342	5.45186		0.869019
52.2411	15.3222	36.09	38.4222	5.43937		0.870685
52.3411	15.4024	36.1718	38.5024	5.4314		0.872352
52.4411	15.4825	36.2528	38.5825	5.42753		0.874019
52.5411	15.5625	36.333	38.6625	5.42667		0.875685
52.6411	15.6424	36.4137	38.7424	5.42294		0.877352
52.7411	15.7223	36.4954	38.8223	5.41461		0.879019
52.8411	15.8022	36.5781	38.9022	5.40126		0.880685
52.9411	15.8819	36.6619	38.9819	5.3826		0.882352
53.0411	15.9616	36.7468	39.0616	5.35845		0.884019
53.1411	16.0412	36.8328	39.1412	5.32884		0.885685
53.2411	16.1208	36.9199	39.2208	5.29397		0.887352
53.3411	16.2003	37.0081	39.3003	5.25417		0.889019
53.4411	16.2797	37.0971	39.3797	5.20989		0.890685
53.5411	16.359	37.1869	39.459	5.16242		0.892352
53.6411	16.4383	37.2756	39.5383	5.1194		0.894019
53.7411	16.5174	37.3627	39.6174	5.08377		0.895685
53.8411	16.5965	37.4478	39.6965	5.05698		0.897352
53.9411	16.6756	37.5305	39.7756	5.04033		0.899019
54.0411	16.7545	37.6107	39.8545	5.03459		0.900685
54.1411	16.8334	37.6884	39.9334	5.03983		0.902352
54.2411	16.9122	37.7638	40.0122	5.05534		0.904019
54.3411	16.9909	37.837	40.0909	5.07985		0.905685
54.4411	17.0695	37.9086	40.1695	5.1119		0.907352
54.5411	17.1481	37.9789	40.2481	5.14907		0.909019
54.6411	17.2265	38.0504	40.3265	5.18056		0.910685
54.7411	17.3049	38.1249	40.4049	5.19811		0.912352
54.8411	17.3832	38.2056	40.4832	5.18739		0.914019
54.9411	17.4614	38.2994	40.5614	5.11646		0.915685
55.0411	17.5395	38.417	40.6395	4.93951		0.917352
55.1411	17.6175	38.5597	40.7175	4.65624		0.919019
55.2411	17.6955	38.7174	40.7955	4.31843		0.920685
55.3411	17.7733	38.8821	40.8733	3.96502		0.922352
55.4411	17.8511	39.0501	40.9511	3.61352		0.924019
55.5411	17.9287	39.2198	41.0287	3.27231		0.925685
55.6411	18.0063	39.3882	41.1063	2.95198		0.927352
55.7411	18.0838	39.5535	41.1838	2.65781		0.929019
55.8411	18.1612	39.7128	41.2612	2.39736		0.930685
55.9411	18.2385	39.8601	41.3385	2.18561		0.932352
56.0411	18.3157	39.9871	41.4157	2.04076		0.934019
56.1411	18.3928	40.0929	41.4928	1.95963		0.935685
56.2411	18.4698	40.1852	41.5698	1.91716		0.937352
56.3411	18.5467	40.2706	41.6467	1.89359		0.939019
56.4411	18.6235	40.3526	41.7235	1.87929		0.940685
56.5411	18.7002	40.433	41.8002	1.86942		0.942352
56.6411	18.7768	40.5137	41.8768	1.85812		0.944019
56.7411	18.8534	40.5954	41.9534	1.84406		0.945685
56.8411	18.9298	40.6781	42.0298	1.82705		0.947352
56.9411	19.0061	40.7619	42.1061	1.80694		0.949019
57.0411	19.0823	40.8468	42.1823	1.78367		0.950685
57.1411	19.1584	40.9328	42.2584	1.7573		0.952352
57.2411	19.2344	41.0199	42.3344	1.72798		0.954019
57.3411	19.3104	41.1081	42.4104	1.69596		0.955685
57.4411	19.3862	41.1971	42.4862	1.66155		0.957352
57.5411	19.4619	41.2869	42.5619	1.62558		0.959019
57.6411	19.5375	41.3753	42.6375	1.59297		0.960685
57.7411	19.6129	41.4615	42.7129	1.56605		0.962352
57.8411	19.6883	41.5448	42.7883	1.54645		0.964019
57.9411	19.7636	41.6243	42.8636	1.53582		0.965685
58.0411	19.8388	41.6997	42.9388	1.53531		0.967352
58.1411	19.9139	41.7709	43.0139	1.54501		0.969019
58.2411	19.9888	41.8382	43.0888	1.56395		0.970685
58.3411	20.0637	41.9025	43.1637	1.59053		0.972352
58.4411	20.1384	41.9644	43.2384	1.62308		0.974019
58.5411	20.213	42.0248	43.313	1.65955		0.975685
58.6411	20.2876	42.0863	43.3876	1.69314		0.977352
58.7411	20.362	42.1501	43.462	1.72088		0.979019
58.8411	20.4363	42.2169	43.5363	1.74073		0.980685
58.9411	20.5105	42.2873	43.6105	1.75065		0.982352
59.0411	20.5845	42.362	43.6845	1.74923		0.984019
59.1411	20.6585	42.4408	43.7585	1.73636		0.985685
59.2411	20.7324	42.5234	43.8324	1.71329		0.987352
59.3411	20.8061	42.6092	43.9061	1.68206		0.989019
59.4411	20.8797	42.6973	43.9797	1.64475		0.990685
59.5411	20.9533	42.7869	44.0533	1.60375		0.992352
59.6411	21.0267	42.8753	44.1267	1.56587		0.994019
59.7411	21.1	42.9615	44.2	1.53373		0.995685
59.8411	21.1731	43.0448	44.2731	1.5089		0.997352
59.9411	21.2462	43.1243	44.3462	1.49298		0.999019
60.0411	21.3192	43.1997	44.4192	1.48703		1.00069
60.1411	21.392	43.2709	44.492	1.49113		1.00235
60.2411	21.4647	43.3382	44.5647	1.50423		1.00402
60.3411	21.5373	43.4025	44.6373	1.52474		1.00569
60.4411	21.6098	43.4644	44.7098	1.55098		1.00735
60.5411	21.6822	43.5248	44.7822	1.58095		1.00902
60.6411	21.7544	43.5863	44.8544	1.60797		1.01069
60.7411	21.8265	43.6501	44.9265	1.62918		1.01235
60.8411	21.8986	43.7169	44.9986	1.64263		1.01402
60.9411	21.9705	43.7873	45.0705	1.64638		1.01569
61.0411	22.0422	43.862	45.1422	1.6391		1.01735
61.1411	22.1139	43.9408	45.2139	1.62077		1.01902
61.2411	22.1854	44.0234	45.2854	1.59265		1.02069
61.3411	22.2569	44.1092	45.3569	1.55675		1.02235
61.4411	22.3282	44.1973	45.4282	1.51514		1.02402
61.5411	22.3994	44.2869	45.4994	1.47014		1.02569
61.6411	22.4704	44.3753	45.5704	1.42829		1.02735
61.7411	22.5414	44.4615	45.6414	1.39207		1.02902
61.8411	22.6122	44.5448	45.7122	1.36293		1.03069
61.9411	22.6829	44.6243	45.7829	1.34235		1.03235
62.0411	22.7535	44.6997	45.8535	1.33127		1.03402
62.1411	22.824	44.7709	45.924	1.32968		1.03569
62.2411	22.8943	44.8382	45.9943	1.33658		1.03735
62.3411	22.9646	44.9025	46.0646	1.35039		1.03902
62.4411	23.0347	44.9644	46.1347	1.36952		1.04069
62.5411	23.1047	45.0248	46.2047	1.39206		1.04235
62.6411	23.1745	45.0863	46.2745	1.41175		1.04402
62.7411	23.2443	45.1501	46.3443	1.42591		1.04569
62.8411	23.3139	45.2169	46.4139	1.43276		1.04735
62.9411	23.3834	45.2873	46.4834	1.43051		1.04902
63.0411	23.4528	45.362	46.5528	1.41801		1.05069
63.1411	23.522	45.4408	46.622	1.39526		1.05235
63.2411	23.5912	45.5234	46.6912	1.36354		1.05402
63.3411	23.6602	45.6092	46.7602	1.32478		1.05569
63.4411	23.7291	45.6973	46.8291	1.28093		1.05735
63.5411	23.7978	45.7869	46.8978	1.23415		1.05902
63.6411	23.8665	45.8756	46.9665	1.1899		1.06069
63.7411	23.935	45.9627	47.035	1.14977		1.06235
63.8411	24.0034	46.0478	47.1034	1.11434		1.06402
63.9411	24.0717	46.1305	47.1717	1.08402		1.06569
64.0411	24.1398	46.2107	47.2398	1.05903		1.06735
64.1411	24.2078	46.2884	47.3078	1.03921		1.06902
64.2411	24.2758	46.3638	47.3758	1.02411		1.07069
64.3411	24.3435	46.437	47.4435	1.01305		1.07235
64.4411	24.4112	46.5086	47.5112	1.00528		1.07402
64.5411	24.4787	46.5787	47.5787	1.00016		1.07569
64.6411	24.5461	46.6471	47.6461	0.99809		1.07735
64.7411	24.6134	46.7133	47.7134	1.00026		1.07902
64.8411	24.6806	46.7765	47.7806	1.00813		1.08069
64.9411	24.7476	46.8361	47.8476	1.02321		1.08235
65.0411	24.8146	46.8915	47.9146	1.04668		1.08402
65.1411	24.8814	46.9426	47.9814	1.07893		1.08569
65.2411	24.948	46.99	48.048	1.11941		1.08735
65.3411	25.0146	47.0343	48.1146	1.16705		1.08902
65.4411	25.081	47.0762	48.181	1.22063		1.09069
65.5411	25.1473	47.1166	48.2473	1.27852		1.09235
65.6411	25.2135	47.1584	48.3135	1.33431		1.09402
65.7411	25.2795	47.203	48.3795	1.38416		1.09569
65.8411	25.3455	47.2522	48.4455	1.42385		1.09735
65.9411	25.4113	47.308	48.5113	1.44786		1.09902
66.0411	25.4769	47.3722	48.5769	1.45139		1.10069
66.1411	25.5425	47.445	48.6425	1.43395		1.10235
66.2411	25.6079	47.5248	48.7079	1.39973		1.10402
66.3411	25.6732	47.6095	48.7732	1.35431		1.10569
66.4411	25.7384	47.6973	48.8384	1.30217		1.10735
66.5411	25.8035	47.7869	48.9035	1.24681		1.10902
66.6411	25.8684	47.8753	48.9684	1.19486		1.11069
66.7411	25.9332	47.9615	49.0332	1.14855		1.11235
66.8411	25.9979	48.0448	49.0979	1.10913		1.11402
66.9411	26.0625	48.1243	49.1625	1.07777		1.11569
67.0411	26.1269	48.1997	49.2269	1.05517		1.11735
67.1411	26.1912	48.2709	49.2912	1.04117		1.11902
67.2411	26.2554	48.3382	49.3554	1.03471		1.12069
67.3411	26.3195	48.4025	49.4195	1.03431		1.12235
67.4411	26.3835	48.4644	49.4835	1.03847		1.12402
67.5411	26.4473	48.5247	49.5473	1.04559		1.12569
67.6411	26.511	48.5855	49.611	1.05161		1.12735
67.7411	26.5745	48.6472	49.6745	1.05549		1.12902
67.8411	26.638	48.7099	49.738	1.05705		1.13069
67.9411	26.7013	48.7736	49.8013	1.05612		1.13235
68.0411	26.7645	48.8385	49.8645	1.05264		1.13402
68.1411	26.8276	48.9046	49.9276	1.04661		1.13569
68.2411	26.8906	48.9717	49.9906	1.03812		1.13735
68.3411	26.9534	49.0398	50.0534	1.02733		1.13902
68.4411	27.0161	49.1089	50.1161	1.01445		1.14069
68.5411	27.0787	49.1787	50.1787	1.00006		1.14235
68.6411	27.1412	49.2474	50.2412	0.987542		1.14402
68.7411	27.2035	49.3145	50.3035	0.978168		1.14569
68.8411	27.2657	49.3795	50.3657	0.972571		1.14735
68.9411	27.3278	49.4423	50.4278	0.971315		1.14902
69.0411	27.3898	49.5025	50.4898	0.974763		1.15069
69.1411	27.4517	49.5602	50.5517	0.982972		1.15235
69.2411	27.5134	49.6155	50.6134	0.995681		1.15402
69.3411	27.575	49.6688	50.675	1.0124		1.15569
69.4411	27.6365	49.7203	50.7365	1.03253		1.15735
69.5411	27.6978	49.7707	50.7978	1.05503		1.15902
69.6411	27.7591	49.8222	50.8591	1.07503		1.16069
69.7411	27.8202	49.876	50.9202	1.09026		1.16235
69.8411	27.8812	49.9328	50.9812	1.09913		1.16402
69.9411	27.9421	49.9932	51.0421	1.10004		1.16569
70.0411	28.0028	50.0579	51.1028	1.09194		1.16735
70.1411	28.0634	50.1267	51.1634	1.07484		1.16902
70.2411	28.1239	50.1993	51.2239	1.04984		1.17069
70.3411	28.1843	50.2751	51.2843	1.01863		1.17235
70.4411	28.2446	50.3532	51.3446	0.982956		1.17402
70.5411	28.3047	50.4328	51.4047	0.944747		1.17569
70.6411	28.3648	50.5112	51.4648	0.909268		1.17735
70.7411	28.4247	50.5874	51.5247	0.878449		1.17902
70.8411	28.4845	50.6607	51.5845	0.853397		1.18069
70.9411	28.5441	50.7302	51.6441	0.835203		1.18235
71.0411	28.6037	50.7956	51.7037	0.824561		1.18402
71.1411	28.6631	50.8568	51.7631	0.82141		1.18569
71.2411	28.7224	50.9141	51.8224	0.824925		1.18735
71.3411	28.7815	50.9684	51.8815	0.833867		1.18902
71.4411	28.8406	51.0203	51.9406	0.846986		1.19069
71.5411	28.8995	51.0707	51.9995	0.862823		1.19235
71.6411	28.9584	51.1219	52.0584	0.876934		1.19402
71.7411	29.0171	51.1748	52.1171	0.887772		1.19569
71.8411	29.0756	51.2298	52.1756	0.894631		1.19735
71.9411	29.1341	51.2871	52.2341	0.896891		1.19902
72.0411	29.1924	51.3468	52.2924	0.89418		1.20069
72.1411	29.2507	51.4091	52.3507	0.886489		1.20235
72.2411	29.3088	51.4738	52.4088	0.874184		1.20402
72.3411	29.3668	51.5405	52.4668	0.857894		1.20569
72.4411	29.4246	51.609	52.5246	0.838357		1.20735
72.5411	29.4824	51.6787	52.5824	0.816702		1.20902
72.6411	29.54	51.7471	52.64	0.797263		1.21069
72.7411	29.5975	51.8133	52.6975	0.781817		1.21235
72.8411	29.6549	51.8765	52.7549	0.771506		1.21402
72.9411	29.7122	51.9361	52.8122	0.767495		1.21569
73.0411	29.7693	51.9915	52.8693	0.770609		1.21735
73.1411	29.8264	52.0426	52.9264	0.780972		1.21902
73.2411	29.8833	52.09	52.9833	0.79796		1.22069
73.3411	29.9401	52.1343	53.0401	0.820511		1.22235
73.4411	29.9968	52.1762	53.0968	0.847513		1.22402
73.5411	30.0534	52.2166	53.1534	0.877555		1.22569
73.6411	30.1098	52.2581	53.2098	0.905697		1.22735
73.7411	30.1661	52.3019	53.2661	0.929721		1.22902
73.8411	30.2224	52.3487	53.3224	0.948059		1.23069
73.9411	30.2785	52.3991	53.3785	0.959123		1.23235
74.0411	30.3345	52.4537	53.4345	0.961807		1.23402
74.1411	30.3903	52.5126	53.4903	0.955987		1.23569
74.2411	30.4461	52.5752	53.5461	0.942577		1.23735
74.3411	30.5017	52.641	53.6017	0.923087		1.23902
74.4411	30.5573	52.709	53.6573	0.899089		1.24069
74.5411	30.6127	52.7787	53.7127	0.872333		1.24235
74.6411	30.668	52.8474	53.768	0.847389		1.24402
74.7411	30.7231	52.9145	53.8231	0.82564		1.24569
74.8411	30.7782	52.9795	53.8782	0.80759		1.24735
74.9411	30.8332	53.0423	53.9332	0.793663		1.24902
75.0411	30.888	53.1025	53.988	0.784089		1.25069
75.1411	30.9427	53.1602	54.0427	0.77882		1.25235
75.2411	30.9973	53.2155	54.0973	0.777531		1.25402
75.3411	31.0518	53.2688	54.1518	0.779703		1.25569
75.4411	31.1062	53.3203	54.2062	0.784751		1.25735
75.5411	31.1605	53.3706	54.2605	0.791815		1.25902
75.6411	31.2146	53.4214	54.3146	0.79787		1.26069
75.7411	31.2687	53.4731	54.3687	0.802091		1.26235
75.8411	31.3226	53.5258	54.4226	0.804302		1.26402
75.9411	31.3764	53.5795	54.4764	0.80437		1.26569
76.0411	31.4301	53.6344	54.5301	0.802226		1.26735
76.1411	31.4837	53.6905	54.5837	0.797873		1.26902
76.2411	31.5372	53.7476	54.6372	0.791388		1.27069
76.3411	31.5905	53.8057	54.6905	0.782912		1.27235
76.4411	31.6438	53.8648	54.7438	0.77263		1.27402
76.5411	31.6969	53.9245	54.7969	0.76109		1.27569
76.6411	31.75	53.983	54.85	0.75167		1.27735
76.7411	31.8029	54.0392	54.9029	0.745993		1.27902
76.8411	31.8557	54.0924	54.9557	0.745247		1.28069
76.9411	31.9084	54.142	55.0084	0.750677		1.28235
77.0411	31.961	54.1874	55.061	0.763219		1.28402
77.1411	32.0135	54.2285	55.1135	0.783131		1.28569
77.2411	32.0658	54.2659	55.1658	0.809917		1.28735
77.3411	32.1181	54.3002	55.2181	0.842621		1.28902
77.4411	32.1703	54.3321	55.2703	0.880199		1.29069
77.5411	32.2223	54.3625	55.3223	0.921281		1.29235
77.6411	32.2742	54.394	55.3742	0.960817		1.29402
77.7411	32.326	54.4278	55.426	0.996475		1.29569
77.8411	32.3778	54.4646	55.4778	1.02656		1.29735
77.9411	32.4294	54.505	55.5294	1.0493		1.29902
78.0411	32.4809	54.5496	55.5809	1.06344		1.30069
78.1411	32.5322	54.5985	55.6322	1.06869		1.30235
78.2411	32.5835	54.6511	55.6835	1.06588		1.30402
78.3411	32.6347	54.7068	55.7347	1.05649		1.30569
78.4411	32.6858	54.7649	55.7858	1.04208		1.30735
78.5411	32.7367	54.8245	55.8367	1.02449		1.30902
78.6411	32.7876	54.883	55.8876	1.00917		1.31069
78.7411	32.8383	54.9392	55.9383	0.998225		1.31235
78.8411	32.8889	54.9924	55.9889	0.99302		1.31402
78.9411	32.9395	55.042	56.0395	0.994948		1.31569
79.0411	32.9899	55.0874	56.0899	1.00503		1.31735
79.1411	33.0402	55.1285	56.1402	1.02348		1.31902
79.2411	33.0904	55.1659	56.1904	1.04963		1.32069
79.3411	33.1405	55.2002	56.2405	1.08233		1.32235
79.4411	33.1905	55.2321	56.2905	1.1203		1.32402
79.5411	33.2404	55.2625	56.3404	1.16196		1.32569
79.6411	33.2902	55.294	56.3902	1.2016		1.32735
79.7411	33.3399	55.3278	56.4399	1.23668		1.32902
79.8411	33.3894	55.3646	56.4894	1.26535		1.33069
79.9411	33.4389	55.405	56.5389	1.28576		1.33235
80.0411	33.4883	55.4496	56.5883	1.29655		1.33402
80.1411	33.5376	55.4985	56.6376	1.29751		1.33569
80.2411	33.5867	55.5511	56.6867	1.2896		1.33735
80.3411	33.6358	55.6068	56.7358	1.27449		1.33902
80.4411	33.6847	55.6649	56.7847	1.25392		1.34069
80.5411	33.7336	55.7247	56.8336	1.22967		1.34235
80.6411	33.7823	55.7847	56.8823	1.20484		1.34402
80.7411	33.831	55.8447	56.931	1.18004		1.34569
80.8411	33.8795	55.9047	56.9795	1.15527		1.34735
80.9411	33.9279	55.9647	57.0279	1.13055		1.34902
81.0411	33.9763	56.0247	57.0763	1.10589		1.35069
81.1411	34.0245	56.0847	57.1245	1.08128		1.35235
81.2411	34.0726	56.1447	57.1726	1.05674		1.35402
81.3411	34.1207	56.2047	57.2207	1.03227		1.35569
81.4411	34.1686	56.2647	57.2686	1.00789		1.35735
81.5411	34.2164	56.3245	57.3164	0.983857		1.35902
81.6411	34.2642	56.383	57.3642	0.962703		1.36069
81.7411	34.3118	56.4392	57.4118	0.94595		1.36235
81.8411	34.3593	56.4924	57.4593	0.934864		1.36402
81.9411	34.4067	56.542	57.5067	0.93074		1.36569
82.0411	34.4541	56.5874	57.5541	0.934496		1.36735
82.1411	34.5013	56.6285	57.6013	0.946269		1.36902
82.2411	34.5484	56.6659	57.6484	0.965362		1.37069
82.3411	34.5954	56.7002	57.6954	0.990594		1.37235
82.4411	34.6424	56.7321	57.7424	1.02073		1.37402
82.5411	34.6892	56.7624	57.7892	1.05433		1.37569
82.6411	34.7359	56.7932	57.8359	1.08738		1.37735
82.7411	34.7826	56.8248	57.8826	1.11878		1.37902
82.8411	34.8291	56.8575	57.9291	1.14825		1.38069
82.9411	34.8755	56.8913	57.9755	1.17554		1.38235
83.0411	34.9219	56.9262	58.0219	1.20047		1.38402
83.1411	34.9681	56.9622	58.0681	1.22296		1.38569
83.2411	35.0143	56.9994	58.1143	1.243		1.38735
83.3411	35.0603	57.0375	58.1603	1.26068		1.38902
83.4411	35.1062	57.0766	58.2062	1.27614		1.39069
83.5411	35.1521	57.1164	58.2521	1.28971		1.39235
83.6411	35.1979	57.1564	58.2979	1.30281		1.39402
83.7411	35.2435	57.1964	58.3435	1.31576		1.39569
83.8411	35.2891	57.2364	58.3891	1.32855		1.39735
83.9411	35.3345	57.2764	58.4345	1.34118		1.39902
84.0411	35.3799	57.3164	58.4799	1.35365		1.40069
84.1411	35.4252	57.3564	58.5252	1.36595		1.40235
84.2411	35.4704	57.3964	58.5704	1.37809		1.40402
84.3411	35.5154	57.4364	58.6154	1.39005		1.40569
84.4411	35.5604	57.4764	58.6604	1.40184		1.40735
84.5411	35.6053	57.5165	58.7053	1.41329		1.40902
84.6411	35.6501	57.5573	58.7501	1.42292		1.41069
84.7411	35.6948	57.599	58.7948	1.43014		1.41235
84.8411	35.7395	57.6416	58.8395	1.43473		1.41402
84.9411	35.784	57.6854	58.884	1.43651		1.41569
85.0411	35.8284	57.7303	58.9284	1.43537		1.41735
85.1411	35.8727	57.7764	58.9727	1.43131		1.41902
85.2411	35.917	57.8235	59.017	1.42444		1.42069
85.3411	35.9611	57.8716	59.0611	1.41491		1.42235
85.4411	36.0052	57.9207	59.1052	1.40296		1.42402
85.5411	36.0491	57.9706	59.1491	1.38886		1.42569
85.6411	36.093	58.0214	59.193	1.37267		1.42735
85.7411	36.1368	58.0731	59.2368	1.3542		1.42902
85.8411	36.1805	58.1258	59.2805	1.33331		1.43069
85.9411	36.224	58.1795	59.324	1.30989		1.43235
86.0411	36.2675	58.2344	59.3675	1.28393		1.43402
86.1411	36.311	58.2905	59.411	1.2555		1.43569
86.2411	36.3543	58.3476	59.4543	1.22477		1.43735
86.3411	36.3975	58.4057	59.4975	1.19198		1.43902
86.4411	36.4406	58.4648	59.5406	1.15742		1.44069
86.5411	36.4837	58.5245	59.5837	1.12179		1.44235
86.6411	36.5266	58.583	59.6266	1.08922		1.44402
86.7411	36.5695	58.6392	59.6695	1.06156		1.44569
86.8411	36.6123	58.6924	59.7123	1.04011		1.44735
86.9411	36.655	58.742	59.755	1.02614		1.44902
87.0411	36.6976	58.7874	59.7976	1.02051		1.45069
87.1411	36.7401	58.8285	59.8401	1.02324		1.45235
87.2411	36.7825	58.8659	59.8825	1.0335		1.45402
87.3411	36.8248	58.9002	59.9248	1.04996		1.45569
87.4411	36.8671	58.9321	59.9671	1.07126		1.45735
87.5411	36.9092	58.9623	60.0092	1.09615		1.45902
87.6411	36.9513	58.9915	60.0513	1.12318		1.46069
87.7411	36.9933	59.0198	60.0933	1.15232		1.46235
87.8411	37.0352	59.0471	60.1352	1.18385		1.46402
87.9411	37.077	59.0734	60.177	1.21801		1.46569
88.0411	37.1187	59.0985	60.2187	1.25496		1.46735
88.1411	37.1603	59.1224	60.2603	1.29483		1.46902
88.2411	37.2019	59.1453	60.3019	1.33765		1.47069
88.3411	37.2433	59.1672	60.3433	1.38338		1.47235
88.4411	37.2847	59.1881	60.3847	1.43191		1.47402
88.5411	37.326	59.2084	60.426	1.48264		1.47569
88.6411	37.3672	59.2301	60.4672	1.53049		1.47735
88.7411	37.4083	59.2544	60.5083	1.57223		1.47902
88.8411	37.4493	59.2826	60.5493	1.60469		1.48069
88.9411	37.4903	59.3159	60.5903	1.62416		1.48235
89.0411	37.5311	59.3553	60.6311	1.6278		1.48402
89.1411	37.5719	59.401	60.6719	1.6153		1.48569
89.2411	37.6126	59.452	60.7126	1.58911		1.48735
89.3411	37.6532	59.5071	60.7532	1.55287		1.48902
89.4411	37.6937	59.565	60.7937	1.50988		1.49069
89.5411	37.7342	59.6245	60.8342	1.46319		1.49235
89.6411	37.7745	59.683	60.8745	1.41974		1.49402
89.7411	37.8148	59.7392	60.9148	1.38202		1.49569
89.8411	37.855	59.7924	60.955	1.3515		1.49735
89.9411	37.8951	59.842	60.9951	1.32959		1.49902
90.0411	37.9351	59.8874	61.0351	1.31726		1.50069
90.1411	37.975	59.9285	61.075	1.31446		1.50235
90.2411	38.0149	59.9659	61.1149	1.32018		1.50402
90.3411	38.0547	60.0002	61.1547	1.33286		1.50569
90.4411	38.0943	60.0321	61.1943	1.3509		1.50735
90.5411	38.134	60.0624	61.234	1.37245		1.50902
90.6411	38.1735	60.0937	61.2735	1.3919		1.51069
90.7411	38.2129	60.1266	61.3129	1.40732		1.51235
90.8411	38.2523	60.1616	61.3523	1.41781		1.51402
90.9411	38.2916	60.1988	61.3916	1.42262		1.51569
91.0411	38.3308	60.2386	61.4308	1.42126		1.51735
91.1411	38.3699	60.2809	61.4699	1.41369		1.51902
91.2411	38.4089	60.3256	61.5089	1.40036		1.52069
91.3411	38.4479	60.3723	61.5479	1.38202		1.52235
91.4411	38.4868	60.4208	61.5868	1.35956		1.52402
91.5411	38.5256	60.4706	61.6256	1.33408		1.52569
91.6411	38.5643	60.5206	61.6643	1.30815		1.52735
91.7411	38.6029	60.5706	61.7029	1.2823		1.52902
91.8411	38.6415	60.6206	61.7415	1.25652		1.53069
91.9411	38.68	60.6706	61.78	1.23084		1.53235
92.0411	38.7184	60.7206	61.8184	1.20524		1.53402
92.1411	38.7567	60.7706	61.8567	1.17974		1.53569
92.2411	38.795	60.8206	61.895	1.15435		1.53735
92.3411	38.8331	60.8706	61.9331	1.12907		1.53902
92.4411	38.8712	60.9206	61.9712	1.1039		1.54069
92.5411	38.9092	60.9706	62.0092	1.07886		1.54235
92.6411	38.9472	61.0206	62.0472	1.05394		1.54402
92.7411	38.985	61.0706	62.085	1.02916		1.54569
92.8411	39.0228	61.1206	62.1228	1.00451		1.54735
92.9411	39.0605	61.1706	62.1605	0.980015		1.54902
93.0411	39.0981	61.2206	62.1981	0.95567		1.55069
93.1411	39.1357	61.2706	62.2357	0.931484		1.55235
93.2411	39.1732	61.3206	62.2732	0.907461		1.55402
93.3411	39.2106	61.3706	62.3106	0.883609		1.55569
93.4411	39.2479	61.4206	62.3479	0.859934		1.55735
93.5411	39.2851	61.4704	62.3851	0.836675		1.55902
93.6411	39.3223	61.5189	62.4223	0.816169		1.56069
93.7411	39.3594	61.5651	62.4594	0.799796		1.56235
93.8411	39.3964	61.6083	62.4964	0.788703		1.56402
93.9411	39.4334	61.6479	62.5334	0.784062		1.56569
94.0411	39.4702	61.6833	62.5702	0.786699		1.56735
94.1411	39.507	61.7144	62.607	0.796732		1.56902
94.2411	39.5437	61.7418	62.6437	0.813526		1.57069
94.3411	39.5804	61.7661	62.6804	0.836004		1.57235
94.4411	39.617	61.788	62.717	0.863042		1.57402
94.5411	39.6535	61.8082	62.7535	0.89346		1.57569
94.6411	39.6899	61.8282	62.7899	0.924778		1.57735
94.7411	39.7262	61.8482	62.8262	0.956492		1.57902
94.8411	39.7625	61.8682	62.8625	0.988594		1.58069
94.9411	39.7987	61.8882	62.8987	1.02108		1.58235
95.0411	39.8348	61.9082	62.9348	1.05394		1.58402
95.1411	39.8709	61.9282	62.9709	1.08717		1.58569
95.2411	39.9069	61.9482	63.0069	1.12076		1.58735
95.3411	39.9428	61.9682	63.0428	1.1547		1.58902
95.4411	39.9786	61.9882	63.0786	1.189		1.59069
95.5411	40.0144	62.0083	63.1144	1.2234		1.59235
95.6411	40.0501	62.0296	63.1501	1.25556		1.59402
95.7411	40.0857	62.0525	63.1857	1.28417		1.59569
95.8411	40.1213	62.0775	63.2213	1.30832		1.59735
95.9411	40.1568	62.1047	63.2568	1.32718		1.59902
96.0411	40.1922	62.1345	63.2922	1.3402		1.60069
96.1411	40.2275	62.1668	63.3275	1.34726		1.60235
96.2411	40.2628	62.2015	63.3628	1.34867		1.60402
96.3411	40.298	62.2382	63.398	1.34511		1.60569
96.4411	40.3331	62.2767	63.4331	1.33736		1.60735
96.5411	40.3682	62.3164	63.4682	1.32647		1.60902
96.6411	40.4032	62.3564	63.5032	1.31495		1.61069
96.7411	40.4381	62.3964	63.5381	1.30332		1.61235
96.8411	40.4729	62.4364	63.5729	1.29159		1.61402
96.9411	40.5077	62.4764	63.6077	1.27975		1.61569
97.0411	40.5424	62.5164	63.6424	1.26781		1.61735
97.1411	40.5771	62.5564	63.6771	1.25578		1.61902
97.2411	40.6116	62.5964	63.7116	1.24364		1.62069
97.3411	40.6461	62.6364	63.7461	1.23141		1.62235
97.4411	40.6806	62.6764	63.7806	1.2191		1.62402
97.5411	40.7149	62.7163	63.8149	1.20697		1.62569
97.6411	40.7492	62.7548	63.8492	1.19787		1.62735
97.7411	40.7835	62.791	63.8835	1.19356		1.62902
97.8411	40.8176	62.8242	63.9176	1.19557		1.63069
97.9411	40.8517	62.8538	63.9517	1.20551		1.63235
98.0411	40.8858	62.8792	63.9858	1.22458		1.63402
98.1411	40.9197	62.9003	64.0197	1.25308		1.63569
98.2411	40.9536	62.9177	64.0536	1.29037		1.63735
98.3411	40.9874	62.9319	64.0874	1.33518		1.63902
98.4411	41.0212	62.9438	64.1212	1.38617		1.64069
98.5411	41.0549	62.9543	64.1549	1.44155		1.64235
98.6411	41.0885	62.966	64.1885	1.49452		1.64402
98.7411	41.1221	62.9807	64.2221	1.54106		1.64569
98.8411	41.1556	62.9999	64.2556	1.57681		1.64735
98.9411	41.189	63.0257	64.289	1.59606		1.64902
99.0411	41.2224	63.0599	64.3224	1.59392		1.65069
99.1411	41.2557	63.1027	64.3557	1.56998		1.65235
99.2411	41.2889	63.1525	64.3889	1.52871		1.65402
99.3411	41.3221	63.2072	64.4221	1.47603		1.65569
99.4411	41.3552	63.265	64.4552	1.41661		1.65735
99.5411	41.3882	63.3245	64.4882	1.35415		1.65902
99.6411	41.4212	63.3828	64.5212	1.29591		1.66069
99.7411	41.4541	63.438	64.5541	1.24574		1.66235
99.8411	41.4869	63.4876	64.5869	1.20849		1.66402
99.9411	41.5197	63.5278	64.6197	1.19232		1.66569
100.041	41.5524	63.5541	64.6524	1.2063		1.66735
100.141	41.5851	63.5662	64.6851	1.25202		1.66902
100.241	41.6177	63.5678	64.7177	1.32213		1.67069
100.341	41.6502	63.5634	64.7502	1.40842		1.67235
100.441	41.6827	63.5556	64.7827	1.50569		1.67402
100.541	41.7151	63.546	64.8151	1.61049		1.67569
100.641	41.7474	63.5378	64.8474	1.71511		1.67735
100.741	41.7797	63.5326	64.8797	1.81462		1.67902
100.841	41.8119	63.5325	64.9119	1.90276		1.68069
100.941	41.844	63.5405	64.944	1.97005		1.68235
101.041	41.8761	63.5594	64.9761	2.00709		1.68402
101.141	41.9082	63.5897	65.0082	2.01212		1.68569
101.241	41.9401	63.6286	65.0401	1.99244		1.68735
101.341	41.972	63.673	65.072	1.95714		1.68902
101.441	42.0039	63.7208	65.1039	1.91275		1.69069
101.541	42.0356	63.7706	65.1356	1.86329		1.69235
101.641	42.0674	63.8214	65.1674	1.81167		1.69402
101.741	42.099	63.8731	65.199	1.75816		1.69569
101.841	42.1306	63.9258	65.2306	1.70265		1.69735
101.941	42.1622	63.9795	65.2622	1.6451		1.69902
102.041	42.1936	64.0344	65.2936	1.58556		1.70069
102.141	42.225	64.0905	65.325	1.52418		1.70235
102.241	42.2564	64.1476	65.3564	1.46123		1.70402
102.341	42.2877	64.2057	65.3877	1.39704		1.70569
102.441	42.3189	64.2648	65.4189	1.33198		1.70735
102.541	42.3501	64.3245	65.4501	1.2669		1.70902
102.641	42.3812	64.3828	65.4812	1.20659		1.71069
102.741	42.4123	64.4381	65.5123	1.15385		1.71235
102.841	42.4433	64.4889	65.5433	1.11165		1.71402
102.941	42.4742	64.5331	65.5742	1.08384		1.71569
103.041	42.5051	64.5689	65.6051	1.07364		1.71735
103.141	42.5359	64.5961	65.6359	1.08118		1.71902
103.241	42.5667	64.6163	65.6667	1.10328		1.72069
103.341	42.5974	64.6316	65.6974	1.13578		1.72235
103.441	42.628	64.6438	65.728	1.17545		1.72402
103.541	42.6586	64.6542	65.7586	1.21972		1.72569
103.641	42.6891	64.6649	65.7891	1.26377		1.72735
103.741	42.7196	64.6766	65.8196	1.30637		1.72902
103.841	42.75	64.6893	65.85	1.34718		1.73069
103.941	42.7803	64.7031	65.8803	1.38593		1.73235
104.041	42.8106	64.718	65.9106	1.42242		1.73402
104.141	42.8409	64.734	65.9409	1.45653		1.73569
104.241	42.8711	64.7511	65.9711	1.48824		1.73735
104.341	42.9012	64.7693	66.0012	1.51762		1.73902
104.441	42.9313	64.7884	66.0313	1.5448		1.74069
104.541	42.9613	64.8084	66.0613	1.56982		1.74235
104.641	42.9912	64.8299	66.0912	1.59095		1.74402
104.741	43.0211	64.8537	66.1211	1.60638		1.74569
104.841	43.051	64.8805	66.151	1.61421		1.74735
104.941	43.0808	64.9109	66.1808	1.61256		1.74902
105.041	43.1105	64.9455	66.2105	1.60017		1.75069
105.141	43.1402	64.9844	66.2402	1.57706		1.75235
105.241	43.1698	65.027	66.2698	1.54454		1.75402
105.341	43.1994	65.0727	66.2994	1.50462		1.75569
105.441	43.2289	65.1208	66.3289	1.45937		1.75735
105.541	43.2583	65.1704	66.3583	1.41111		1.75902
105.641	43.2877	65.2187	66.3877	1.36672		1.76069
105.741	43.3171	65.2638	66.4171	1.32994		1.76235
105.841	43.3464	65.304	66.4464	1.30509		1.76402
105.941	43.3756	65.336	66.4756	1.29872		1.76569
106.041	43.4048	65.357	66.5048	1.31733		1.76735
106.141	43.4339	65.3668	66.5339	1.36218		1.76902
106.241	43.463	65.3679	66.563	1.42831		1.77069
106.341	43.492	65.3634	66.592	1.50946		1.77235
106.441	43.521	65.3556	66.621	1.60114		1.77402
106.541	43.5499	65.346	66.6499	1.70003		1.77569
106.641	43.5787	65.3378	66.6787	1.79824		1.77735
106.741	43.6075	65.3326	66.7075	1.89049		1.77902
106.841	43.6363	65.3329	66.7363	1.96944		1.78069
106.941	43.665	65.3428	66.765	2.02272		1.78235
107.041	43.6936	65.3664	66.7936	2.03692		1.78402
107.141	43.7222	65.4044	66.8222	2.01025		1.78569
107.241	43.7508	65.4527	66.8508	1.95458		1.78735
107.341	43.7793	65.5071	66.8793	1.88279		1.78902
107.441	43.8077	65.5649	66.9077	1.80297		1.79069
107.541	43.8361	65.6245	66.9361	1.72017		1.79235
107.641	43.8644	65.6828	66.9644	1.64263		1.79402
107.741	43.8927	65.7381	66.9927	1.57403		1.79569
107.841	43.9209	65.7889	67.0209	1.51785		1.79735
107.941	43.9491	65.8331	67.0491	1.4786		1.79902
108.041	43.9772	65.8689	67.0772	1.46002		1.80069
108.141	44.0053	65.8961	67.1053	1.46217		1.80235
108.241	44.0333	65.9163	67.1333	1.48118		1.80402
108.341	44.0613	65.9316	67.1613	1.51209		1.80569
108.441	44.0892	65.9438	67.1892	1.55101		1.80735
108.541	44.1171	65.9542	67.2171	1.59493		1.80902
108.641	44.1449	65.9649	67.2449	1.63832		1.81069
108.741	44.1727	65.9766	67.2727	1.67976		1.81235
108.841	44.2004	65.9893	67.3004	1.71893		1.81402
108.941	44.2281	66.0031	67.3281	1.75554		1.81569
109.041	44.2557	66.018	67.3557	1.78941		1.81735
109.141	44.2832	66.034	67.3832	1.82043		1.81902
109.241	44.3108	66.0511	67.4108	1.84861		1.82069
109.341	44.3382	66.0693	67.4382	1.87405		1.82235
109.441	44.3657	66.0884	67.4657	1.89694		1.82402
109.541	44.393	66.1084	67.493	1.9173		1.82569
109.641	44.4203	66.1301	67.5203	1.93288		1.82735
109.741	44.4476	66.1544	67.5476	1.941		1.82902
109.841	44.4748	66.1826	67.5748	1.93841		1.83069
109.941	44.502	66.2159	67.602	1.92144		1.83235
110.041	44.5291	66.2553	67.6291	1.88748		1.83402
110.141	44.5562	66.301	67.6562	1.8367		1.83569
110.241	44.5832	66.352	67.6832	1.77222		1.83735
110.341	44.6102	66.4071	67.7102	1.69824		1.83902
110.441	44.6372	66.465	67.7372	1.6185		1.84069
110.541	44.664	66.5245	67.764	1.53636		1.84235
110.641	44.6909	66.5829	67.7909	1.45928		1.84402
110.741	44.7177	66.6381	67.8177	1.39139		1.84569
110.841	44.7444	66.6875	67.8444	1.33841		1.84735
110.941	44.7711	66.7261	67.8711	1.31106		1.84902
111.041	44.7977	66.7478	67.8977	1.32249		1.85069
111.141	44.8243	66.7518	67.9243	1.37488		1.85235
111.241	44.8509	66.7439	67.9509	1.45695		1.85402
111.341	44.8774	66.7294	67.9774	1.55747		1.85569
111.441	44.9039	66.7115	68.0039	1.67016		1.85735
111.541	44.9303	66.6919	68.0303	1.79122		1.85902
111.641	44.9566	66.6736	68.0566	1.91284		1.86069
111.741	44.9829	66.6584	68.0829	2.02947		1.86235
111.841	45.0092	66.6489	68.1092	2.13243		1.86402
111.941	45.0354	66.6504	68.1354	2.20547		1.86569
112.041	45.0616	66.6687	68.1616	2.22882		1.86735
112.141	45.0878	66.7047	68.1878	2.19957		1.86902
112.241	45.1138	66.7526	68.2138	2.13524		1.87069
112.341	45.1399	66.807	68.2399	2.05304		1.87235
112.441	45.1659	66.8649	68.2659	1.96263		1.87402
112.541	45.1918	66.9245	68.2918	1.86948		1.87569
112.641	45.2177	66.9828	68.3177	1.78212		1.87735
112.741	45.2436	67.0379	68.3436	1.70469		1.87902
112.841	45.2694	67.0881	68.3694	1.64182		1.88069
112.941	45.2952	67.1301	68.3952	1.60042		1.88235
113.041	45.3209	67.1611	68.4209	1.58698		1.88402
113.141	45.3466	67.1809	68.4466	1.60195		1.88569
113.241	45.3722	67.192	68.4722	1.63901		1.88735
113.341	45.3978	67.1975	68.4978	1.69074		1.88902
113.441	45.4233	67.1997	68.5233	1.75199		1.89069
113.541	45.4488	67.2001	68.5488	1.819		1.89235
113.641	45.4743	67.2018	68.5743	1.88363		1.89402
113.741	45.4997	67.2062	68.5997	1.94187		1.89569
113.841	45.5251	67.2144	68.6251	1.99015		1.89735
113.941	45.5504	67.2276	68.6504	2.02428		1.89902
114.041	45.5757	67.2471	68.6757	2.04095		1.90069
114.141	45.6009	67.2727	68.7009	2.03969		1.90235
114.241	45.6261	67.3038	68.7261	2.02304		1.90402
114.341	45.6513	67.3388	68.7513	1.99495		1.90569
114.441	45.6764	67.3767	68.7764	1.959		1.90735
114.541	45.7014	67.4163	68.8014	1.91859		1.90902
114.641	45.7265	67.4545	68.8265	1.88217		1.91069
114.741	45.7514	67.4899	68.8514	1.85388		1.91235
114.841	45.7764	67.5207	68.8764	1.83789		1.91402
114.941	45.8013	67.5449	68.9013	1.83974		1.91569
115.041	45.8261	67.5607	68.9261	1.8644		1.91735
115.141	45.8509	67.5679	68.9509	1.91284		1.91902
115.241	45.8757	67.5681	68.9757	1.98143		1.92069
115.341	45.9004	67.5634	69.0004	2.06502		1.92235
115.441	45.9251	67.5556	69.0251	2.15944		1.92402
115.541	45.9497	67.546	69.0497	2.26116		1.92569
115.641	45.9743	67.5378	69.0743	2.36097		1.92735
115.741	45.9989	67.5326	69.0989	2.45325		1.92902
115.841	46.0234	67.5325	69.1234	2.53101		1.93069
115.941	46.0479	67.5405	69.1479	2.58379		1.93235
116.041	46.0723	67.5594	69.1723	2.60142		1.93402
116.141	46.0967	67.5897	69.1967	2.58256		1.93569
116.241	46.1211	67.6286	69.2211	2.53594		1.93735
116.341	46.1454	67.673	69.2454	2.47216		1.93902
116.441	46.1696	67.7208	69.2696	2.39873		1.94069
116.541	46.1939	67.7704	69.2939	2.32086		1.94235
116.641	46.218	67.8187	69.318	2.24817		1.94402
116.741	46.2422	67.864	69.3422	2.1851		1.94569
116.841	46.2663	67.9048	69.3663	2.13595		1.94735
116.941	46.2904	67.939	69.3904	2.10639		1.94902
117.041	46.3144	67.9648	69.4144	2.10128		1.95069
117.141	46.3384	67.982	69.4384	2.12104		1.95235
117.241	46.3623	67.9922	69.4623	2.16128		1.95402
117.341	46.3862	67.9975	69.4862	2.21621		1.95569
117.441	46.4101	67.9997	69.5101	2.2812		1.95735
117.541	46.4339	68.0001	69.5339	2.35243		1.95902
117.641	46.4577	68.0019	69.5577	2.42057		1.96069
117.741	46.4814	68.0067	69.5814	2.47976		1.96235
117.841	46.5051	68.017	69.6051	2.52205		1.96402
117.941	46.5288	68.0369	69.6288	2.53421		1.96569
118.041	46.5524	68.0705	69.6524	2.50235		1.96735
118.141	46.576	68.1185	69.676	2.42581		1.96902
118.241	46.5996	68.1768	69.6996	2.31873		1.97069
118.341	46.6231	68.2412	69.7231	2.19587		1.97235
118.441	46.6465	68.3091	69.7465	2.06635		1.97402
118.541	46.67	68.3786	69.77	1.9358		1.97569
118.641	46.6934	68.4469	69.7934	1.81304		1.97735
118.741	46.7167	68.5121	69.8167	1.70214		1.97902
118.841	46.74	68.5722	69.84	1.60748		1.98069
118.941	46.7633	68.6242	69.8633	1.5354		1.98235
119.041	46.7866	68.6652	69.8866	1.4916		1.98402
119.141	46.8098	68.695	69.9098	1.47564		1.98569
119.241	46.8329	68.7161	69.9329	1.48071		1.98735
119.341	46.8561	68.7316	69.9561	1.49923		1.98902
119.441	46.8791	68.7438	69.9791	1.52601		1.99069
119.541	46.9022	68.754	70.0022	1.55787		1.99235
119.641	46.9252	68.7633	70.0252	1.59244		1.99402
119.741	46.9482	68.7716	70.0482	1.62965		1.99569
119.841	46.9711	68.7789	70.0711	1.66981		1.99735
119.941	46.994	68.7851	70.094	1.7132		1.99902
120.041	47.0169	68.7902	70.1169	1.76001		2.00069
120.141	47.0397	68.7942	70.1397	1.81039		2.00235
120.241	47.0625	68.7971	70.1625	1.86435		2.00402
120.341	47.0853	68.7989	70.1853	1.92186		2.00569
120.441	47.108	68.7999	70.208	1.98278		2.00735
120.541	47.1307	68.8	70.2307	2.04677		2.00902
120.641	47.1533	68.8	70.2533	2.11207		2.01069
120.741	47.1759	68.8	70.2759	2.17829		2.01235
120.841	47.1985	68.8	70.2985	2.24542		2.01402
120.941	47.221	68.8	70.321	2.31346		2.01569
121.041	47.2435	68.8	70.3435	2.38241		2.01735
121.141	47.266	68.8	70.366	2.45225		2.01902
121.241	47.2884	68.8	70.3884	2.52299		2.02069
121.341	47.3108	68.8	70.4108	2.59462		2.02235
121.441	47.3331	68.8	70.4331	2.66714		2.02402
121.541	47.3555	68.8001	70.4555	2.7401		2.02569
121.641	47.3777	68.8019	70.4777	2.80857		2.02735
121.741	47.4	68.8067	70.5	2.86722		2.02902
121.841	47.4222	68.817	70.5222	2.90758		2.03069
121.941	47.4444	68.8369	70.5444	2.91555		2.03235
122.041	47.4665	68.8705	70.5665	2.87633		2.03402
122.141	47.4886	68.9185	70.5886	2.78928		2.03569
122.241	47.5107	68.9768	70.6107	2.66954		2.03735
122.341	47.5327	69.0412	70.6327	2.53289		2.03902
122.441	47.5547	69.1091	70.6547	2.3891		2.04069
122.541	47.5767	69.1786	70.6767	2.24415		2.04235
122.641	47.5986	69.2469	70.6986	2.10747		2.04402
122.741	47.6205	69.3121	70.7205	1.98372		2.04569
122.841	47.6424	69.3717	70.7424	1.87867		2.04735
122.941	47.6642	69.4219	70.7642	1.80181		2.04902
123.041	47.686	69.4582	70.786	1.76298		2.05069
123.141	47.7078	69.4803	70.8078	1.76226		2.05235
123.241	47.7295	69.492	70.8295	1.78901		2.05402
123.341	47.7512	69.4976	70.8512	1.83233		2.05569
123.441	47.7728	69.4997	70.8728	1.88548		2.05735
123.541	47.7945	69.5001	70.8945	1.94417		2.05902
123.641	47.8161	69.5019	70.9161	1.99984		2.06069
123.741	47.8376	69.5066	70.9376	2.04788		2.06235
123.841	47.8591	69.5158	70.9591	2.08336		2.06402
123.941	47.8806	69.5315	70.9806	2.09985		2.06569
124.041	47.9021	69.5558	71.0021	2.09187		2.06735
124.141	47.9235	69.5886	71.0235	2.05904		2.06902
124.241	47.9449	69.6284	71.0449	2.00652		2.07069
124.341	47.9663	69.673	71.0663	1.94104		2.07235
124.441	47.9876	69.7209	71.0876	1.86795		2.07402
124.541	48.0089	69.7704	71.1089	1.79142		2.07569
124.641	48.0301	69.8188	71.1301	1.71969		2.07735
124.741	48.0514	69.864	71.1514	1.65732		2.07902
124.841	48.0725	69.9034	71.1725	1.61073		2.08069
124.941	48.0937	69.932	71.1937	1.59196		2.08235
125.041	48.1148	69.9436	71.2148	1.61593		2.08402
125.141	48.1359	69.9377	71.2359	1.68545		2.08569
125.241	48.157	69.9197	71.257	1.78822		2.08735
125.341	48.178	69.8953	71.278	1.91191		2.08902
125.441	48.199	69.8674	71.299	2.04952		2.09069
125.541	48.22	69.8378	71.32	2.19685		2.09235
125.641	48.2409	69.8096	71.3409	2.34501		2.09402
125.741	48.2618	69.7844	71.3618	2.48828		2.09569
125.841	48.2827	69.7643	71.3827	2.61926		2.09735
125.941	48.3035	69.7522	71.4035	2.72672		2.09902
126.041	48.3243	69.7512	71.4243	2.79936		2.10069
126.141	48.3451	69.7614	71.4451	2.83469		2.10235
126.241	48.3658	69.7804	71.4658	2.84084		2.10402
126.341	48.3866	69.8048	71.4866	2.82821		2.10569
126.441	48.4072	69.8326	71.5072	2.80433		2.10735
126.541	48.4279	69.8624	71.5279	2.77383		2.10902
126.641	48.4485	69.8932	71.5485	2.74016		2.11069
126.741	48.4691	69.9248	71.5691	2.70354		2.11235
126.841	48.4896	69.9575	71.5896	2.66377		2.11402
126.941	48.5102	69.9913	71.6102	2.62068		2.11569
127.041	48.5307	70.0262	71.6307	2.57425		2.11735
127.141	48.5511	70.0622	71.6511	2.52455		2.11902
127.241	48.5716	70.0994	71.6716	2.47181		2.12069
127.341	48.592	70.1375	71.692	2.41634		2.12235
127.441	48.6123	70.1766	71.7123	2.35851		2.12402
127.541	48.6327	70.2163	71.7327	2.29926		2.12569
127.641	48.653	70.2551	71.753	2.24369		2.12735
127.741	48.6733	70.2922	71.7733	2.19367		2.12902
127.841	48.6935	70.3272	71.7935	2.15004		2.13069
127.941	48.7137	70.3599	71.8137	2.11349		2.13235
128.041	48.7339	70.3902	71.8339	2.08441		2.13402
128.141	48.7541	70.4179	71.8541	2.06269		2.13569
128.241	48.7742	70.4432	71.8742	2.04775		2.13735
128.341	48.7943	70.4665	71.8943	2.0387		2.13902
128.441	48.8144	70.488	71.9144	2.03454		2.14069
128.541	48.8344	70.5083	71.9344	2.03383		2.14235
128.641	48.8544	70.529	71.9544	2.03169		2.14402
128.741	48.8744	70.5507	71.9744	2.02685		2.14569
128.841	48.8944	70.5734	71.9944	2.01904		2.14735
128.941	48.9143	70.5972	72.0143	2.0081		2.14902
129.041	48.9342	70.6221	72.0342	1.99393		2.15069
129.141	48.954	70.6481	72.054	1.97657		2.15235
129.241	48.9739	70.6752	72.0739	1.95615		2.15402
129.341	48.9937	70.7034	72.0937	1.93289		2.15569
129.441	49.0134	70.7325	72.1134	1.90709		2.15735
129.541	49.0332	70.7622	72.1332	1.87961		2.15902
129.641	49.0529	70.7907	72.1529	1.85575		2.16069
129.741	49.0726	70.8169	72.1726	1.83805		2.16235
129.841	49.0923	70.8401	72.1923	1.82835		2.16402
129.941	49.1119	70.8597	72.2119	1.82854		2.16569
130.041	49.1315	70.875	72.2315	1.83998		2.16735
130.141	49.1511	70.8862	72.2511	1.86289		2.16902
130.241	49.1706	70.8936	72.2706	1.8963		2.17069
130.341	49.1901	70.8978	72.2901	1.93853		2.17235
130.441	49.2096	70.8997	72.3096	1.98781		2.17402
130.541	49.2291	70.9	72.3291	2.0423		2.17569
130.641	49.2485	70.9	72.3485	2.09822		2.17735
130.741	49.2679	70.9	72.3679	2.15482		2.17902
130.841	49.2873	70.9	72.3873	2.21209		2.18069
130.941	49.3067	70.9	72.4067	2.27002		2.18235
131.041	49.326	70.9	72.426	2.32861		2.18402
131.141	49.3453	70.9	72.4453	2.38787		2.18569
131.241	49.3645	70.9	72.4645	2.44779		2.18735
131.341	49.3838	70.9	72.4838	2.50836		2.18902
131.441	49.403	70.9	72.503	2.56958		2.19069
131.541	49.4222	70.9001	72.5222	2.63101		2.19235
131.641	49.4413	70.9019	72.5413	2.68772		2.19402
131.741	49.4605	70.9067	72.5605	2.73485		2.19569
131.841	49.4796	70.9166	72.5796	2.76542		2.19735
131.941	49.4986	70.9346	72.5986	2.76909		2.19902
132.041	49.5177	70.9635	72.6177	2.73621		2.20069
132.141	49.5367	71.0038	72.6367	2.66643		2.20235
132.241	49.5557	71.0527	72.6557	2.56959		2.20402
132.341	49.5747	71.1072	72.6747	2.45706		2.20569
132.441	49.5936	71.165	72.6936	2.33675		2.20735
132.541	49.6125	71.2245	72.7125	2.21404		2.20902
132.641	49.6314	71.2829	72.7314	2.09802		2.21069
132.741	49.6503	71.3383	72.7503	1.99368		2.21235
132.841	49.6691	71.3876	72.7691	1.90849		2.21402
132.941	49.6879	71.4249	72.7879	1.85786		2.21569
133.041	49.7067	71.4419	72.8067	1.86264		2.21735
133.141	49.7254	71.4377	72.8254	1.92585		2.21902
133.241	49.7442	71.4199	72.8442	2.02839		2.22069
133.341	49.7629	71.3954	72.8629	2.15346		2.22235
133.441	49.7815	71.3674	72.8815	2.29257		2.22402
133.541	49.8002	71.3378	72.9002	2.4411		2.22569
133.641	49.8188	71.3093	72.9188	2.59047		2.22735
133.741	49.8374	71.2838	72.9374	2.73429		2.22902
133.841	49.856	71.2645	72.956	2.86116		2.23069
133.941	49.8745	71.2583	72.9745	2.94539		2.23235
134.041	49.893	71.2759	72.993	2.94864		2.23402
134.141	49.9115	71.3186	73.0115	2.8661		2.23569
134.241	49.93	71.3763	73.03	2.73485		2.23735
134.341	49.9484	71.441	73.0484	2.584		2.23902
134.441	49.9669	71.509	73.0669	2.42684		2.24069
134.541	49.9852	71.5787	73.0852	2.26981		2.24235
134.641	50.0036	71.647	73.1036	2.12176		2.24402
134.741	50.0219	71.7122	73.1219	1.98737		2.24569
134.841	50.0403	71.7716	73.1403	1.87317		2.24735
134.941	50.0586	71.8202	73.1586	1.79119		2.24902
135.041	50.0768	71.8519	73.1768	1.7555		2.25069
135.141	50.0951	71.8659	73.1951	1.76665		2.25235
135.241	50.1133	71.868	73.2133	1.80984		2.25402
135.341	50.1315	71.8635	73.2315	1.87125		2.25569
135.441	50.1496	71.8556	73.2496	1.94324		2.25735
135.541	50.1678	71.846	73.2678	2.02142		2.25902
135.641	50.1859	71.8372	73.2859	2.09852		2.26069
135.741	50.204	71.8302	73.304	2.17205		2.26235
135.841	50.222	71.8251	73.322	2.24073		2.26402
135.941	50.2401	71.8224	73.3401	2.30335		2.26569
136.041	50.2581	71.8222	73.3581	2.35906		2.26735
136.141	50.2761	71.8245	73.3761	2.40751		2.26902
136.241	50.294	71.8291	73.394	2.44898		2.27069
136.341	50.312	71.8359	73.412	2.48419		2.27235
136.441	50.3299	71.8443	73.4299	2.51405		2.27402
136.541	50.3478	71.8542	73.4478	2.53945		2.27569
136.641	50.3657	71.8658	73.4657	2.55963		2.27735
136.741	50.3835	71.8796	73.4835	2.5726		2.27902
136.841	50.4013	71.8963	73.5013	2.57601		2.28069
136.941	50.4191	71.9168	73.5191	2.56754		2.28235
137.041	50.4369	71.9414	73.5369	2.54565		2.28402
137.141	50.4547	71.9702	73.5547	2.51038		2.28569
137.241	50.4724	72.0029	73.5724	2.46334		2.28735
137.341	50.4901	72.0386	73.5901	2.40708		2.28902
137.441	50.5078	72.0767	73.6078	2.34414		2.29069
137.541	50.5254	72.1163	73.6254	2.27742		2.29235
137.641	50.5431	72.1546	73.6431	2.21556		2.29402
137.741	50.5607	72.1897	73.6607	2.16361		2.29569
137.841	50.5783	72.2194	73.6783	2.12822		2.29735
137.941	50.5958	72.2396	73.6958	2.12065		2.29902
138.041	50.6134	72.2459	73.7134	2.1534		2.30069
138.141	50.6309	72.2379	73.7309	2.22884		2.30235
138.241	50.6484	72.2196	73.7484	2.33703		2.30402
138.341	50.6658	72.1952	73.7658	2.4668		2.30569
138.441	50.6833	72.1674	73.7833	2.61108		2.30735
138.541	50.7007	72.1378	73.8007	2.76522		2.30902
138.641	50.7181	72.1095	73.8181	2.9192		2.31069
138.741	50.7355	72.0844	73.8355	3.06637		2.31235
138.841	50.7528	72.0647	73.8528	3.19738		2.31402
138.941	50.7702	72.0545	73.8702	3.29644		2.31569
139.041	50.7875	72.0582	73.8875	3.34617		2.31735
139.141	50.8047	72.0762	73.9047	3.34367		2.31902
139.241	50.822	72.1045	73.922	3.30338		2.32069
139.341	50.8392	72.1389	73.9392	3.24128		2.32235
139.441	50.8565	72.1767	73.9565	3.16747		2.32402
139.541	50.8737	72.2163	73.9737	3.08824		2.32569
139.641	50.8908	72.2548	73.9908	3.01392		2.32735
139.741	50.908	72.291	74.008	2.94813		2.32902
139.841	50.9251	72.3242	74.0251	2.89305		2.33069
139.941	50.9422	72.3538	74.0422	2.85083		2.33235
140.041	50.9593	72.3792	74.0593	2.82288		2.33402
140.141	50.9764	72.4003	74.0764	2.80913		2.33569
140.241	50.9934	72.4177	74.0934	2.80805		2.33735
140.341	51.0104	72.4319	74.1104	2.81726		2.33902
140.441	51.0274	72.4438	74.1274	2.83438		2.34069
140.541	51.0444	72.454	74.1444	2.85723		2.34235
140.641	51.0613	72.4633	74.1613	2.88335		2.34402
140.741	51.0783	72.4716	74.1783	2.91266		2.34569
140.841	51.0952	72.4789	74.1952	2.94553		2.34735
140.941	51.112	72.4851	74.212	2.98225		2.34902
141.041	51.1289	72.4902	74.2289	3.02301		2.35069
141.141	51.1458	72.4942	74.2458	3.06792		2.35235
141.241	51.1626	72.4971	74.2626	3.11693		2.35402
141.341	51.1794	72.4989	74.2794	3.16992		2.35569
141.441	51.1961	72.4999	74.2961	3.22665		2.35735
141.541	51.2129	72.5001	74.3129	3.28624		2.35902
141.641	51.2296	72.5014	74.3296	3.3426		2.36069
141.741	51.2464	72.5043	74.3464	3.39319		2.36235
141.841	51.263	72.5092	74.363	3.43659		2.36402
141.941	51.2797	72.5165	74.3797	3.47155		2.36569
142.041	51.2964	72.5263	74.3964	3.49722		2.36735
142.141	51.313	72.5386	74.413	3.51343		2.36902
142.241	51.3296	72.5532	74.4296	3.52073		2.37069
142.341	51.3462	72.57	74.4462	3.52017		2.37235
142.441	51.3627	72.5884	74.4627	3.51302		2.37402
142.541	51.3793	72.6083	74.4793	3.50065		2.37569
142.641	51.3958	72.629	74.4958	3.48482		2.37735
142.741	51.4123	72.6507	74.5123	3.46551		2.37902
142.841	51.4288	72.6734	74.5288	3.44241		2.38069
142.941	51.4453	72.6972	74.5453	3.41532		2.38235
143.041	51.4617	72.7221	74.5617	3.38412		2.38402
143.141	51.4781	72.7481	74.5781	3.34887		2.38569
143.241	51.4945	72.7752	74.5945	3.30976		2.38735
143.341	51.5109	72.8034	74.6109	3.26709		2.38902
143.441	51.5273	72.8325	74.6273	3.22124		2.39069
143.541	51.5436	72.8622	74.6436	3.17334		2.39235
143.641	51.5599	72.8907	74.6599	3.13026		2.39402
143.741	51.5762	72.9169	74.6762	3.09531		2.39569
143.841	51.5925	72.9401	74.6925	3.07085		2.39735
143.941	51.6087	72.9597	74.7087	3.05928		2.39902
144.041	51.625	72.975	74.725	3.06227		2.40069
144.141	51.6412	72.9862	74.7412	3.08		2.40235
144.241	51.6574	72.9936	74.7574	3.11109		2.40402
144.341	51.6736	72.9978	74.7736	3.15323		2.40569
144.441	51.6897	72.9997	74.7897	3.20405		2.40735
144.541	51.7059	73	74.8059	3.26111		2.40902
144.641	51.722	73	74.822	3.31957		2.41069
144.741	51.7381	73	74.8381	3.37848		2.41235
144.841	51.7541	73	74.8541	3.43784		2.41402
144.941	51.7702	73	74.8702	3.49764		2.41569
145.041	51.7862	73	74.8862	3.55788		2.41735
145.141	51.8023	73	74.9023	3.61856		2.41902
145.241	51.8182	73	74.9182	3.67968		2.42069
145.341	51.8342	73	74.9342	3.74123		2.42235
145.441	51.8502	73	74.9502	3.80322		2.42402
145.541	51.8661	73.0001	74.9661	3.86514		2.42569
145.641	51.882	73.0017	74.982	3.92184		2.42735
145.741	51.8979	73.0055	74.9979	3.96991		2.42902
145.841	51.9138	73.0122	75.0138	4.00635		2.43069
145.941	51.9297	73.0227	75.0297	4.02808		2.43235
146.041	51.9455	73.0373	75.0455	4.03299		2.43402
146.141	51.9613	73.0561	75.0613	4.02087		2.43569
146.241	51.9772	73.0788	75.0772	3.99351		2.43735
146.341	51.9929	73.1045	75.0929	3.95385		2.43902
146.441	52.0087	73.1326	75.1087	3.90496		2.44069
146.541	52.0244	73.1624	75.1244	3.84962		2.44235
146.641	52.0402	73.1932	75.1402	3.79086		2.44402
146.741	52.0559	73.2248	75.1559	3.72891		2.44569
146.841	52.0716	73.2575	75.1716	3.66352		2.44735
146.941	52.0872	73.2913	75.1872	3.59453		2.44902
147.041	52.1029	73.3262	75.2029	3.52192		2.45069
147.141	52.1185	73.3622	75.2185	3.44579		2.45235
147.241	52.1341	73.3994	75.2341	3.36643		2.45402
147.341	52.1497	73.4375	75.2497	3.28419		2.45569
147.441	52.1653	73.4766	75.2653	3.19954		2.45735
147.541	52.1809	73.5163	75.2809	3.11367		2.45902
147.641	52.1964	73.5545	75.2964	3.03409		2.46069
147.741	52.2119	73.5897	75.3119	2.96598		2.46235
147.841	52.2274	73.6198	75.3274	2.91587		2.46402
147.941	52.2429	73.6419	75.3429	2.89356		2.46569
148.041	52.2584	73.6529	75.3584	2.90862		2.46735
148.141	52.2738	73.6527	75.3738	2.9624		2.46902
148.241	52.2893	73.6437	75.3893	3.04681		2.47069
148.341	52.3047	73.6293	75.4047	3.15198		2.47235
148.441	52.3201	73.6115	75.4201	3.27093		2.47402
148.541	52.3354	73.5919	75.4354	3.39857		2.47569
148.641	52.3508	73.5736	75.4508	3.52376		2.47735
148.741	52.3661	73.558	75.4661	3.64104		2.47902
148.841	52.3814	73.5461	75.4814	3.74546		2.48069
148.941	52.3967	73.5394	75.4967	3.83118		2.48235
149.041	52.412	73.5388	75.512	3.89348		2.48402
149.141	52.4273	73.5445	75.5273	3.9314		2.48569
149.241	52.4425	73.5556	75.5425	3.94813		2.48735
149.341	52.4578	73.5706	75.5578	3.9488		2.48902
149.441	52.473	73.5885	75.573	3.93816		2.49069
149.541	52.4882	73.6081	75.5882	3.92075		2.49235
149.641	52.5034	73.6265	75.6034	3.90781		2.49402
149.741	52.5185	73.6427	75.6185	3.90369		2.49569
149.841	52.5337	73.656	75.6337	3.91119		2.49735
149.941	52.5488	73.6655	75.6488	3.93323		2.49902
150.041	52.5639	73.6709	75.6639	3.9719		2.50069
150.141	52.579	73.6721	75.679	4.02763		2.50235
150.241	52.5941	73.6694	75.6941	4.09902		2.50402
150.341	52.6091	73.6637	75.7091	4.18361		2.50569
150.441	52.6241	73.6556	75.7241	4.27878		2.50735
150.541	52.6392	73.646	75.7392	4.38151		2.50902
150.641	52.6542	73.6367	75.7542	4.48359		2.51069
150.741	52.6691	73.6284	75.7691	4.58281		2.51235
150.841	52.6841	73.6211	75.7841	4.67866		2.51402
150.941	52.6991	73.6149	75.7991	4.7707		2.51569
151.041	52.714	73.6098	75.814	4.85862		2.51735
151.141	52.7289	73.6058	75.8289	4.94225		2.51902
151.241	52.7438	73.6029	75.8438	5.02163		2.52069
151.341	52.7587	73.6011	75.8587	5.09692		2.52235
151.441	52.7736	73.6001	75.8736	5.16842		2.52402
151.541	52.7884	73.6001	75.8884	5.23615		2.52569
151.641	52.8032	73.6019	75.9032	5.2961		2.52735
151.741	52.818	73.6066	75.918	5.34288		2.52902
151.841	52.8328	73.6158	75.9328	5.36888		2.53069
151.941	52.8476	73.6315	75.9476	5.36421		2.53235
152.041	52.8624	73.6558	75.9624	5.32053		2.53402
152.141	52.8771	73.6886	75.9771	5.23749		2.53569
152.241	52.8919	73.7284	75.9919	5.12333		2.53735
152.341	52.9066	73.773	76.0066	4.98865		2.53902
152.441	52.9213	73.8209	76.0213	4.84184		2.54069
152.541	52.9359	73.8704	76.0359	4.68951		2.54235
152.641	52.9506	73.9187	76.0506	4.54499		2.54402
152.741	52.9653	73.9644	76.0653	4.41378		2.54569
152.841	52.9799	74.0062	76.0799	4.30016		2.54735
152.941	52.9945	74.0429	76.0945	4.20896		2.54902
153.041	53.0091	74.0735	76.1091	4.14369		2.55069
153.141	53.0237	74.0978	76.1237	4.10413		2.55235
153.241	53.0382	74.1168	76.1382	4.08631		2.55402
153.341	53.0528	74.1317	76.1528	4.08474		2.55569
153.441	53.0673	74.1438	76.1673	4.09454		2.55735
153.541	53.0818	74.1542	76.1818	4.11123		2.55902
153.641	53.0963	74.1655	76.1963	4.1244		2.56069
153.741	53.1108	74.1784	76.2108	4.13071		2.56235
153.841	53.1253	74.1934	76.2253	4.12875		2.56402
153.941	53.1397	74.2106	76.2397	4.11732		2.56569
154.041	53.1542	74.2304	76.2542	4.09568		2.56735
154.141	53.1686	74.2527	76.2686	4.06385		2.56902
154.241	53.183	74.2773	76.283	4.0226		2.57069
154.341	53.1974	74.3041	76.2974	3.97321		2.57235
154.441	53.2117	74.3326	76.3117	3.91719		2.57402
154.541	53.2261	74.3622	76.3261	3.85692		2.57569
154.641	53.2404	74.3905	76.3404	3.8023		2.57735
154.741	53.2548	74.4161	76.3548	3.75827		2.57902
154.841	53.2691	74.438	76.3691	3.7291		2.58069
154.941	53.2834	74.4547	76.3834	3.71972		2.58235
155.041	53.2976	74.4653	76.3976	3.73404		2.58402
155.141	53.3119	74.4696	76.4119	3.77256		2.58569
155.241	53.3261	74.4686	76.4261	3.83214		2.58735
155.341	53.3404	74.4635	76.4404	3.90803		2.58902
155.441	53.3546	74.4556	76.4546	3.99592		2.59069
155.541	53.3688	74.4459	76.4688	4.09208		2.59235
155.641	53.383	74.4359	76.483	4.1905		2.59402
155.741	53.3971	74.4259	76.4971	4.29003		2.59569
155.841	53.4113	74.4159	76.5113	4.39065		2.59735
155.941	53.4254	74.4059	76.5254	4.49238		2.59902
156.041	53.4395	74.3959	76.5395	4.59521		2.60069
156.141	53.4536	74.3859	76.5536	4.69913		2.60235
156.241	53.4677	74.3759	76.5677	4.80415		2.60402
156.341	53.4818	74.3659	76.5818	4.91027		2.60569
156.441	53.4959	74.3559	76.5959	5.01747		2.60735
156.541	53.5099	74.346	76.6099	5.12514		2.60902
156.641	53.5239	74.3377	76.6239	5.2267		2.61069
156.741	53.5379	74.3321	76.6379	5.31697		2.61235
156.841	53.5519	74.3302	76.6519	5.3903		2.61402
156.941	53.5659	74.3335	76.6659	5.44011		2.61569
157.041	53.5799	74.343	76.6799	5.46128		2.61735
157.141	53.5938	74.3586	76.6938	5.45321		2.61902
157.241	53.6078	74.3797	76.7078	5.42012		2.62069
157.341	53.6217	74.4047	76.7217	5.36838		2.62235
157.441	53.6356	74.4326	76.7356	5.30377		2.62402
157.541	53.6495	74.4622	76.7495	5.23165		2.62569
157.641	53.6634	74.491	76.7634	5.16386		2.62735
157.741	53.6772	74.518	76.7772	5.10401		2.62902
157.841	53.6911	74.5431	76.7911	5.05351		2.63069
157.941	53.7049	74.5658	76.8049	5.01357		2.63235
158.041	53.7187	74.5861	76.8187	4.98492		2.63402
158.141	53.7326	74.6038	76.8326	4.96753		2.63569
158.241	53.7463	74.6191	76.8463	4.96062		2.63735
158.341	53.7601	74.6324	76.8601	4.9629		2.63902
158.441	53.7739	74.6439	76.8739	4.97285		2.64069
158.541	53.7876	74.6542	76.8876	4.98828		2.64235
158.641	53.8014	74.6649	76.9014	5.00156		2.64402
158.741	53.8151	74.6766	76.9151	5.01067		2.64569
158.841	53.8288	74.6893	76.9288	5.01518		2.64735
158.941	53.8425	74.7031	76.9425	5.01477		2.64902
159.041	53.8561	74.718	76.9561	5.00928		2.65069
159.141	53.8698	74.734	76.9698	4.99869		2.65235
159.241	53.8834	74.7511	76.9834	4.98318		2.65402
159.341	53.8971	74.7693	76.9971	4.96305		2.65569
159.441	53.9107	74.7884	77.0107	4.93871		2.65735
159.541	53.9243	74.8081	77.0243	4.9114		2.65902
159.641	53.9379	74.8269	77.0379	4.88856		2.66069
159.741	53.9514	74.8439	77.0514	4.87311		2.66235
159.841	53.965	74.859	77.065	4.86651		2.66402
159.941	53.9785	74.8717	77.0785	4.87009		2.66569
160.041	53.9921	74.8819	77.0921	4.88469		2.66735
160.141	54.0056	74.8896	77.1056	4.91042		2.66902
160.241	54.0191	74.895	77.1191	4.94666		2.67069
160.341	54.0326	74.8983	77.1326	4.99224		2.67235
160.441	54.0461	74.8998	77.1461	5.04577		2.67402
160.541	54.0595	74.9001	77.1595	5.10494		2.67569
160.641	54.073	74.9014	77.173	5.16018		2.67735
160.741	54.0864	74.9043	77.1864	5.208		2.67902
160.841	54.0998	74.9092	77.1998	5.24673		2.68069
160.941	54.1132	74.9165	77.2132	5.27489		2.68235
161.041	54.1266	74.9263	77.2266	5.29152		2.68402
161.141	54.14	74.9386	77.24	5.29648		2.68569
161.241	54.1533	74.9532	77.2533	5.29051		2.68735
161.341	54.1667	74.97	77.2667	5.27494		2.68902
161.441	54.18	74.9884	77.28	5.25137		2.69069
161.541	54.1934	75.0081	77.2934	5.22231		2.69235
161.641	54.2067	75.0269	77.3067	5.19749		2.69402
161.741	54.22	75.0439	77.32	5.18029		2.69569
161.841	54.2332	75.059	77.3332	5.17222		2.69735
161.941	54.2465	75.0717	77.3465	5.17465		2.69902
162.041	54.2598	75.0819	77.3598	5.18843		2.70069
162.141	54.273	75.0896	77.373	5.21369		2.70235
162.241	54.2862	75.095	77.3862	5.24977		2.70402
162.341	54.2994	75.0983	77.3994	5.29546		2.70569
162.441	54.3126	75.0998	77.4126	5.34931		2.70735
162.541	54.3258	75.1	77.4258	5.40945		2.70902
162.641	54.339	75.1	77.439	5.4709		2.71069
162.741	54.3522	75.1	77.4522	5.53263		2.71235
162.841	54.3653	75.1	77.4653	5.59464		2.71402
162.941	54.3784	75.1	77.4784	5.65694		2.71569
163.041	54.3916	75.1	77.4916	5.71952		2.71735
163.141	54.4047	75.1	77.5047	5.78238		2.71902
163.241	54.4178	75.1	77.5178	5.84552		2.72069
163.341	54.4308	75.1	77.5308	5.90893		2.72235
163.441	54.4439	75.1	77.5439	5.97263		2.72402
163.541	54.4569	75.1001	77.5569	6.03627		2.72569
163.641	54.47	75.1008	77.57	6.09677		2.72735
163.741	54.483	75.1025	77.583	6.15292		2.72902
163.841	54.496	75.1052	77.596	6.20422		2.73069
163.941	54.509	75.109	77.609	6.25025		2.73235
164.041	54.522	75.1139	77.622	6.29076		2.73402
164.141	54.535	75.1199	77.635	6.32567		2.73569
164.241	54.548	75.127	77.648	6.35511		2.73735
164.341	54.5609	75.1352	77.6609	6.37935		2.73902
164.441	54.5738	75.1443	77.6738	6.39882		2.74069
164.541	54.5868	75.1541	77.6868	6.41432		2.74235
164.641	54.5997	75.1641	77.6997	6.42907		2.74402
164.741	54.6126	75.1741	77.7126	6.44377		2.74569
164.841	54.6255	75.1841	77.7255	6.45843		2.74735
164.941	54.6383	75.1941	77.7383	6.47303		2.74902
165.041	54.6512	75.2041	77.7512	6.48759		2.75069
165.141	54.664	75.2141	77.764	6.50209		2.75235
165.241	54.6769	75.2241	77.7769	6.51655		2.75402
165.341	54.6897	75.2341	77.7897	6.53096		2.75569
165.441	54.7025	75.2441	77.8025	6.54532		2.75735
165.541	54.7153	75.2542	77.8153	6.55908		2.75902
165.641	54.7281	75.2655	77.8281	6.56691		2.76069
165.741	54.7408	75.2784	77.8408	6.56609		2.76235
165.841	54.7536	75.2934	77.8536	6.55488		2.76402
165.941	54.7663	75.3106	77.8663	6.53175		2.76569
166.041	54.7791	75.3304	77.8791	6.49581		2.76735
166.141	54.7918	75.3527	77.8918	6.44708		2.76902
166.241	54.8045	75.3773	77.9045	6.38652		2.77069
166.341	54.8172	75.4041	77.9172	6.31575		2.77235
166.441	54.8299	75.4326	77.9299	6.23664		2.77402
166.541	54.8426	75.4622	77.9426	6.15216		2.77569
166.641	54.8552	75.4905	77.9552	6.07485		2.77735
166.741	54.8679	75.5161	77.9679	6.01094		2.77902
166.841	54.8805	75.538	77.9805	5.96584		2.78069
166.941	54.8931	75.5547	77.9931	5.94584		2.78235
167.041	54.9057	75.5653	78.0057	5.95579		2.78402
167.141	54.9183	75.5696	78.0183	5.99627		2.78569
167.241	54.9309	75.5686	78.0309	6.06314		2.78735
167.341	54.9435	75.5635	78.0435	6.15029		2.78902
167.441	54.956	75.5556	78.056	6.25215		2.79069
167.541	54.9686	75.546	78.0686	6.36328		2.79235
167.641	54.9811	75.5378	78.0811	6.46849		2.79402
167.741	54.9936	75.5326	78.0936	6.55887		2.79569
167.841	55.0061	75.5325	78.1061	6.6237		2.79735
167.941	55.0186	75.5405	78.1186	6.64703		2.79902
168.041	55.0311	75.5594	78.1311	6.61372		2.80069
168.141	55.0436	75.5897	78.1436	6.52262		2.80235
168.241	55.0561	75.6286	78.1561	6.38818		2.80402
168.341	55.0685	75.673	78.1685	6.2274		2.80569
168.441	55.081	75.7208	78.181	6.05218		2.80735
168.541	55.0934	75.7704	78.1934	5.87068		2.80902
168.641	55.1058	75.8189	78.2058	5.69727		2.81069
168.741	55.1182	75.8644	78.2182	5.54047		2.81235
168.841	55.1306	75.9037	78.2306	5.41425		2.81402
168.941	55.143	75.9299	78.243	5.35025		2.81569
169.041	55.1553	75.9323	78.2553	5.39633		2.81735
169.141	55.1677	75.9097	78.2677	5.56042		2.81902
169.241	55.1801	75.872	78.2801	5.79887		2.82069
169.341	55.1924	75.8273	78.2924	6.07678		2.82235
169.441	55.2047	75.7792	78.3047	6.37817		2.82402
169.541	55.217	75.7296	78.317	6.69494		2.82569
169.641	55.2293	75.6811	78.3293	7.01309		2.82735
169.741	55.2416	75.6356	78.3416	7.32237		2.82902
169.841	55.2539	75.5963	78.3539	7.60447		2.83069
169.941	55.2661	75.5701	78.3661	7.81793		2.83235
170.041	55.2784	75.5677	78.3784	7.90023		2.83402
170.141	55.2906	75.5903	78.3906	7.84155		2.83569
170.241	55.3029	75.628	78.4029	7.69962		2.83735
170.341	55.3151	75.6727	78.4151	7.52042		2.83902
170.441	55.3273	75.7208	78.4273	7.32501		2.84069
170.541	55.3395	75.7704	78.4395	7.12383		2.84235
170.641	55.3517	75.8187	78.4517	6.93268		2.84402
170.741	55.3638	75.864	78.4638	6.75918		2.84569
170.841	55.376	75.9048	78.476	6.61097		2.84735
170.941	55.3881	75.939	78.4881	6.49799		2.84902
171.041	55.4003	75.9648	78.5003	6.42858		2.85069
171.141	55.4124	75.982	78.5124	6.40295		2.85235
171.241	55.4245	75.9922	78.5245	6.41269		2.85402
171.341	55.4366	75.9975	78.5366	6.44699		2.85569
171.441	55.4487	75.9997	78.5487	6.49735		2.85735
171.541	55.4608	75.9999	78.5608	6.55792		2.85902
171.641	55.4728	75.9992	78.5728	6.62379		2.86069
171.741	55.4849	75.9975	78.5849	6.6947		2.86235
171.841	55.4969	75.9948	78.5969	6.7712		2.86402
171.941	55.509	75.991	78.609	6.85374		2.86569
172.041	55.521	75.9861	78.621	6.94264		2.86735
172.141	55.533	75.9801	78.633	7.03802		2.86902
172.241	55.545	75.973	78.645	7.13982		2.87069
172.341	55.557	75.9648	78.657	7.24783		2.87235
172.441	55.569	75.9557	78.669	7.36169		2.87402
172.541	55.581	75.946	78.681	7.47986		2.87569
172.641	55.5929	75.9378	78.6929	7.59071		2.87735
172.741	55.6049	75.9325	78.7049	7.68619		2.87902
172.841	55.6168	75.9316	78.7168	7.75709		2.88069
172.941	55.6287	75.9374	78.7287	7.79131		2.88235
173.041	55.6406	75.9516	78.7406	7.77848		2.88402
173.141	55.6525	75.9745	78.7525	7.71772		2.88569
173.241	55.6644	76.0043	78.7644	7.61849		2.88735
173.341	55.6763	76.0389	78.7763	7.49326		2.88902
173.441	55.6882	76.0767	78.7882	7.35194		2.89069
173.541	55.7	76.1163	78.8	7.20243		2.89235
173.641	55.7119	76.1546	78.8119	7.06119		2.89402
173.741	55.7237	76.1902	78.8237	6.93523		2.89569
173.841	55.7356	76.2221	78.8356	6.83018		2.89735
173.941	55.7474	76.2488	78.8474	6.7525		2.89902
174.041	55.7592	76.2694	78.8592	6.70704		2.90069
174.141	55.771	76.2837	78.871	6.69397		2.90235
174.241	55.7828	76.2927	78.8828	6.70855		2.90402
174.341	55.7945	76.2976	78.8945	6.74401		2.90569
174.441	55.8063	76.2997	78.9063	6.79424		2.90735
174.541	55.818	76.3001	78.918	6.85347		2.90902
174.641	55.8298	76.3017	78.9298	6.90692		2.91069
174.741	55.8415	76.3055	78.9415	6.94868		2.91235
174.841	55.8532	76.3122	78.9532	6.97486		2.91402
174.941	55.8649	76.3227	78.9649	6.98158		2.91569
175.041	55.8766	76.3373	78.9766	6.96615		2.91735
175.141	55.8883	76.3561	78.9883	6.92843		2.91902
175.241	55.9	76.3788	79	6.87085		2.92069
175.341	55.9117	76.4045	79.0117	6.79732		2.92235
175.441	55.9233	76.4326	79.0233	6.71187		2.92402
175.541	55.935	76.4622	79.035	6.61919		2.92569
175.641	55.9466	76.4905	79.0466	6.53375		2.92735
175.741	55.9582	76.5161	79.0582	6.46228		2.92902
175.841	55.9699	76.538	79.0699	6.41036		2.93069
175.941	55.9815	76.5547	79.0815	6.38449		2.93235
176.041	55.993	76.5653	79.093	6.38968		2.93402
176.141	56.0046	76.5696	79.1046	6.42646		2.93569
176.241	56.0162	76.5686	79.1162	6.49053		2.93735
176.341	56.0278	76.5635	79.1278	6.57552		2.93902
176.441	56.0393	76.5556	79.1393	6.67562		2.94069
176.541	56.0509	76.546	79.1509	6.78535		2.94235
176.641	56.0624	76.5372	79.1624	6.8914		2.94402
176.741	56.0739	76.5302	79.1739	6.98936		2.94569
176.841	56.0854	76.5251	79.1854	7.07722		2.94735
176.941	56.0969	76.5224	79.1969	7.15316		2.94902
177.041	56.1084	76.5222	79.2084	7.21598		2.95069
177.141	56.1199	76.5245	79.2199	7.26541		2.95235
177.241	56.1314	76.5291	79.2314	7.30217		2.95402
177.341	56.1428	76.5359	79.2428	7.32772		2.95569
177.441	56.1543	76.5443	79.2543	7.34386		2.95735
177.541	56.1657	76.5542	79.2657	7.35251		2.95902
177.641	56.1772	76.5649	79.2772	7.35616		2.96069
177.741	56.1886	76.5766	79.2886	7.35474		2.96235
177.841	56.2	76.5893	79.3	7.34777		2.96402
177.941	56.2114	76.6031	79.3114	7.33489		2.96569
178.041	56.2228	76.618	79.3228	7.3159		2.96735
178.141	56.2342	76.634	79.3342	7.29079		2.96902
178.241	56.2455	76.6511	79.3455	7.2598		2.97069
178.341	56.2569	76.6693	79.3569	7.22329		2.97235
178.441	56.2682	76.6884	79.3682	7.18178		2.97402
178.541	56.2796	76.7082	79.3796	7.13618		2.97569
178.641	56.2909	76.7282	79.3909	7.08994		2.97735
178.741	56.3022	76.7482	79.4022	7.0438		2.97902
178.841	56.3135	76.7682	79.4135	6.99775		2.98069
178.941	56.3249	76.7882	79.4249	6.95181		2.98235
179.041	56.3361	76.8082	79.4361	6.90596		2.98402
179.141	56.3474	76.8282	79.4474	6.86022		2.98569
179.241	56.3587	76.8482	79.4587	6.81457		2.98735
179.341	56.37	76.8682	79.47	6.76903		2.98902
179.441	56.3812	76.8882	79.4812	6.72359		2.99069
179.541	56.3925	76.9081	79.4925	6.67891		2.99235
179.641	56.4037	76.9265	79.5037	6.64167		2.99402
179.741	56.4149	76.9427	79.5149	6.61603		2.99569
179.841	56.4261	76.956	79.5261	6.6056		2.99735
179.941	56.4373	76.9655	79.5373	6.61404		2.99902
180.041	56.4485	76.9709	79.5485	6.64398		3.00069
180.141	56.4597	76.9721	79.5597	6.69577		3.00235
180.241	56.4709	76.9694	79.5709	6.76745		3.00402
180.341	56.482	76.9637	79.582	6.85564		3.00569
180.441	56.4932	76.9556	79.5932	6.95683		3.00735
180.541	56.5043	76.946	79.6043	7.06667		3.00902
180.641	56.5155	76.9378	79.6155	7.17002		3.01069
180.741	56.5266	76.9325	79.6266	7.25841		3.01235
180.841	56.5377	76.9316	79.6377	7.32288		3.01402
180.941	56.5488	76.9374	79.6488	7.3517		3.01569
181.041	56.5599	76.9516	79.6599	7.33483		3.01735
181.141	56.571	76.9745	79.671	7.27144		3.01902
181.241	56.5821	77.0043	79.6821	7.17078		3.02069
181.341	56.5932	77.0389	79.6932	7.04499		3.02235
181.441	56.6042	77.0767	79.7042	6.90373		3.02402
181.541	56.6153	77.1163	79.7153	6.75469		3.02569
181.641	56.6263	77.1545	79.7263	6.61409		3.02735
181.741	56.6374	77.1899	79.7374	6.48972		3.02902
181.841	56.6484	77.2207	79.7484	6.38924		3.03069
181.941	56.6594	77.2449	79.7594	6.32269		3.03235
182.041	56.6704	77.2607	79.7704	6.29866		3.03402
182.141	56.6814	77.2679	79.7814	6.3178		3.03569
182.241	56.6924	77.2681	79.7924	6.37219		3.03735
182.341	56.7034	77.2634	79.8034	6.45138		3.03902
182.441	56.7143	77.2556	79.8143	6.5471		3.04069
182.541	56.7253	77.2459	79.8253	6.65328		3.04235
182.641	56.7362	77.2359	79.8362	6.76179		3.04402
182.741	56.7472	77.2259	79.8472	6.87112		3.04569
182.841	56.7581	77.2159	79.8581	6.98129		3.04735
182.941	56.769	77.2059	79.869	7.09229		3.04902
183.041	56.7799	77.1959	79.8799	7.2041		3.05069
183.141	56.7908	77.1859	79.8908	7.31675		3.05235
183.241	56.8017	77.1759	79.9017	7.43022		3.05402
183.341	56.8126	77.1659	79.9126	7.54451		3.05569
183.441	56.8235	77.1559	79.9235	7.65962		3.05735
183.541	56.8344	77.146	79.9344	7.7748		3.05902
183.641	56.8452	77.1378	79.9452	7.88162		3.06069
183.741	56.8561	77.1326	79.9561	7.97189		3.06235
183.841	56.8669	77.1325	79.9669	8.03386		3.06402
183.941	56.8777	77.1405	79.9777	8.05008		3.06569
184.041	56.8886	77.1594	79.9886	8.00399		3.06735
184.141	56.8994	77.1897	79.9994	7.89439		3.06902
184.241	56.9102	77.2286	80.0102	7.73718		3.07069
184.341	56.921	77.273	80.021	7.55102		3.07235
184.441	56.9317	77.3208	80.0317	7.34898		3.07402
184.541	56.9425	77.3704	80.0425	7.14014		3.07569
184.641	56.9533	77.4187	80.0533	6.94132		3.07735
184.741	56.964	77.464	80.064	6.76037		3.07902
184.841	56.9748	77.5048	80.0748	6.60489		3.08069
184.941	56.9855	77.539	80.0855	6.4848		3.08235
185.041	56.9963	77.5648	80.0963	6.40834		3.08402
185.141	57.007	77.582	80.107	6.37567		3.08569
185.241	57.0177	77.5922	80.1177	6.37831		3.08735
185.341	57.0284	77.5975	80.1284	6.40544		3.08902
185.441	57.0391	77.5997	80.1391	6.44855		3.09069
185.541	57.0498	77.6001	80.1498	6.50091		3.09235
185.641	57.0605	77.6014	80.1605	6.54905		3.09402
185.741	57.0711	77.6043	80.1711	6.58873		3.09569
185.841	57.0818	77.6092	80.1818	6.61809		3.09735
185.941	57.0925	77.6165	80.1925	6.63553		3.09902
186.041	57.1031	77.6263	80.2031	6.64001		3.10069
186.141	57.1137	77.6386	80.2137	6.63144		3.10235
186.241	57.1244	77.6532	80.2244	6.61068		3.10402
186.341	57.135	77.67	80.235	6.57926		3.10569
186.441	57.1456	77.6884	80.2456	6.53898		3.10735
186.541	57.1562	77.7081	80.2562	6.49278		3.10902
186.641	57.1668	77.7265	80.2668	6.4528		3.11069
186.741	57.1774	77.7427	80.2774	6.42428		3.11235
186.841	57.1879	77.756	80.2879	6.41076		3.11402
186.941	57.1985	77.7655	80.2985	6.41585		3.11569
187.041	57.2091	77.7709	80.3091	6.4421		3.11735
187.141	57.2196	77.7721	80.3196	6.48987		3.11902
187.241	57.2301	77.7694	80.3301	6.55718		3.12069
187.341	57.2407	77.7637	80.3407	6.64073		3.12235
187.441	57.2512	77.7556	80.3512	6.73704		3.12402
187.541	57.2617	77.7459	80.3617	6.84255		3.12569
187.641	57.2722	77.7359	80.3722	6.95025		3.12735
187.741	57.2827	77.7259	80.3827	7.05875		3.12902
187.841	57.2932	77.7159	80.3932	7.16804		3.13069
187.941	57.3037	77.7059	80.4037	7.27812		3.13235
188.041	57.3142	77.6959	80.4142	7.389		3.13402
188.141	57.3246	77.6859	80.4246	7.50067		3.13569
188.241	57.3351	77.6759	80.4351	7.61313		3.13735
188.341	57.3455	77.6659	80.4455	7.72638		3.13902
188.441	57.356	77.6559	80.456	7.84042		3.14069
188.541	57.3664	77.646	80.4664	7.95448		3.14235
188.641	57.3768	77.6377	80.4768	8.06039		3.14402
188.741	57.3872	77.6321	80.4872	8.15183		3.14569
188.841	57.3976	77.6302	80.4976	8.22194		3.14735
188.941	57.408	77.6335	80.508	8.2628		3.14902
189.041	57.4184	77.643	80.5184	8.26829		3.15069
189.141	57.4288	77.6586	80.5288	8.23783		3.15235
189.241	57.4392	77.6797	80.5392	8.17675		3.15402
189.341	57.4495	77.7047	80.5495	8.0929		3.15569
189.441	57.4599	77.7326	80.5599	7.99343		3.15735
189.541	57.4702	77.7623	80.5702	7.88468		3.15902
189.641	57.4806	77.7915	80.5806	7.77888		3.16069
189.741	57.4909	77.8198	80.5909	7.67886		3.16235
189.841	57.5012	77.8471	80.6012	7.58503		3.16402
189.941	57.5115	77.8734	80.6115	7.49766		3.16569
190.041	57.5218	77.8985	80.6218	7.41686		3.16735
190.141	57.5321	77.9224	80.6321	7.34254		3.16902
190.241	57.5424	77.9453	80.6424	7.27445		3.17069
190.341	57.5527	77.9672	80.6527	7.21215		3.17235
190.441	57.563	77.9881	80.663	7.1551		3.17402
190.541	57.5733	78.0082	80.6733	7.10237		3.17569
190.641	57.5835	78.0282	80.6835	7.05054		3.17735
190.741	57.5938	78.0482	80.6938	6.99885		3.17902
190.841	57.604	78.0682	80.704	6.9473		3.18069
190.941	57.6142	78.0882	80.7142	6.89591		3.18235
191.041	57.6245	78.1082	80.7245	6.84466		3.18402
191.141	57.6347	78.1282	80.7347	6.79357		3.18569
191.241	57.6449	78.1482	80.7449	6.74262		3.18735
191.341	57.6551	78.1682	80.7551	6.69182		3.18902
191.441	57.6653	78.1882	80.7653	6.64118		3.19069
191.541	57.6755	78.2081	80.7755	6.59134		3.19235
191.641	57.6856	78.2265	80.7856	6.54894		3.19402
191.741	57.6958	78.2427	80.7958	6.51809		3.19569
191.841	57.706	78.256	80.806	6.50236		3.19735
191.941	57.7161	78.2655	80.8161	6.50538		3.19902
192.041	57.7263	78.2709	80.8263	6.5297		3.20069
192.141	57.7364	78.2721	80.8364	6.57568		3.20235
192.241	57.7465	78.2694	80.8465	6.64132		3.20402
192.341	57.7566	78.2637	80.8566	6.72327		3.20569
192.441	57.7668	78.2556	80.8668	6.81804		3.20735
192.541	57.7769	78.246	80.8769	6.92167		3.20902
192.641	57.787	78.2367	80.887	7.0238		3.21069
192.741	57.797	78.2284	80.897	7.12171		3.21235
192.841	57.8071	78.2211	80.9071	7.21481		3.21402
192.941	57.8172	78.2149	80.9172	7.30262		3.21569
193.041	57.8273	78.2098	80.9273	7.38482		3.21735
193.141	57.8373	78.2058	80.9373	7.46128		3.21902
193.241	57.8474	78.2029	80.9474	7.53211		3.22069
193.341	57.8574	78.2011	80.9574	7.59756		3.22235
193.441	57.8675	78.2001	80.9675	7.65805		3.22402
193.541	57.8775	78.2001	80.9775	7.71364		3.22569
193.641	57.8875	78.2019	80.9875	7.75955		3.22735
193.741	57.8975	78.2066	80.9975	7.78932		3.22902
193.841	57.9075	78.2158	81.0075	7.79393		3.23069
193.941	57.9175	78.2315	81.0175	7.76162		3.23235
194.041	57.9275	78.2558	81.0275	7.68257		3.23402
194.141	57.9375	78.2886	81.0375	7.5565		3.23569
194.241	57.9475	78.3284	81.0475	7.39336		3.23735
194.341	57.9574	78.373	81.0574	7.20589		3.23902
194.441	57.9674	78.4209	81.0674	7.00412		3.24069
194.541	57.9773	78.4704	81.0773	6.79592		3.24235
194.641	57.9873	78.5188	81.0873	6.59726		3.24402
194.741	57.9972	78.564	81.0972	6.41723		3.24569
194.841	58.0071	78.6034	81.1071	6.26869		3.24735
194.941	58.0171	78.632	81.1171	6.17562		3.24902
195.041	58.027	78.6436	81.127	6.16691		3.25069
195.141	58.0369	78.6377	81.1369	6.24597		3.25235
195.241	58.0468	78.6197	81.1468	6.38585		3.25402
195.341	58.0567	78.5953	81.1567	6.56055		3.25569
195.441	58.0665	78.5674	81.1665	6.75553		3.25735
195.541	58.0764	78.5378	81.1764	6.96227		3.25902
195.641	58.0863	78.5095	81.1863	7.1651		3.26069
195.741	58.0961	78.4839	81.1961	7.35644		3.26235
195.841	58.106	78.462	81.206	7.52939		3.26402
195.941	58.1158	78.4453	81.2158	7.67588		3.26569
196.041	58.1257	78.4347	81.2257	7.78936		3.26735
196.141	58.1355	78.4304	81.2355	7.86853		3.26902
196.241	58.1453	78.4314	81.2453	7.91792		3.27069
196.341	58.1551	78.4365	81.2551	7.94469		3.27235
196.441	58.1649	78.4444	81.2649	7.95549		3.27402
196.541	58.1747	78.454	81.2747	7.95658		3.27569
196.641	58.1845	78.4628	81.2845	7.96249		3.27735
196.741	58.1943	78.4698	81.2943	7.97782		3.27902
196.841	58.2041	78.4749	81.3041	8.00453		3.28069
196.941	58.2139	78.4776	81.3139	8.0444		3.28235
197.041	58.2236	78.4778	81.3236	8.09859		3.28402
197.141	58.2334	78.4755	81.3334	8.16733		3.28569
197.241	58.2431	78.4709	81.3431	8.2499		3.28735
197.341	58.2529	78.4641	81.3529	8.34482		3.28902
197.441	58.2626	78.4557	81.3626	8.45034		3.29069
197.541	58.2723	78.446	81.3723	8.56372		3.29235
197.641	58.2821	78.4367	81.3821	8.67505		3.29402
[truncated: 2,830 more rows]

## Sheet: 17.02.16-Experiment
t	modelled	measured	Quadr. Abw.	Mittelwert	t
s	%	-	-	-	min
1	100	100.3	0.09	0.861424	0.0166667
1	100	100.3	0.0899945		0.0166667
1	100	100.3	0.0899921		0.0166667
1	100	100.3	0.0899915		0.0166667
1	100	100.3	0.0899913		0.0166667
1.00001	100	100.3	0.0899911		0.0166668
1.00001	100	100.3	0.0899911		0.0166668
1.00001	100	100.3	0.089991		0.0166668
1.00002	100	100.3	0.0899906		0.0166669
1.00003	100	100.3	0.0899898		0.0166672
1.00012	100	100.3	0.0899842		0.0166687
1.00077	100	100.3	0.0899453		0.0166795
1.00531	100	100.299	0.0896729		0.0167552
1.03712	100	100.296	0.0877756		0.0172853
1.13712	100	100.286	0.0819213		0.0189519
1.23712	100	100.276	0.0762507		0.0206186
1.33712	100	100.266	0.0707667		0.0222853
1.43712	100	100.256	0.0654782		0.0239519
1.53712	100.001	100.246	0.0604191		0.0256186
1.63712	100.001	100.237	0.0560291		0.0272853
1.73712	100.001	100.23	0.0525122		0.0289519
1.83712	100.001	100.225	0.0499815		0.0306186
1.93712	100.001	100.222	0.0485427		0.0322853
2.03712	100.002	100.221	0.0482647		0.0339519
2.13712	100.002	100.224	0.0491526		0.0356186
2.23712	100.002	100.229	0.0511445		0.0372853
2.33712	100.003	100.235	0.0541349		0.0389519
2.43712	100.003	100.244	0.0580066		0.0406186
2.53712	100.003	100.254	0.0626556		0.0422853
2.63712	100.004	100.265	0.0681207		0.0439519
2.73712	100.004	100.278	0.0746637		0.0456186
2.83712	100.005	100.292	0.0826344		0.0472853
2.93712	100.005	100.309	0.0924375		0.0489519
3.03712	100.006	100.329	0.104476		0.0506186
3.13712	100.006	100.351	0.119073		0.0522853
3.23712	100.007	100.376	0.136425		0.0539519
3.33712	100.007	100.403	0.156596		0.0556186
3.43712	100.008	100.431	0.179568		0.0572853
3.53712	100.008	100.461	0.205136		0.0589519
3.63712	100.009	100.49	0.231442		0.0606186
3.73712	100.009	100.516	0.256828		0.0622853
3.83712	100.01	100.538	0.278806		0.0639519
3.93712	100.01	100.552	0.292978		0.0656186
4.03712	100.011	100.553	0.294235		0.0672853
4.13712	100.011	100.542	0.281784		0.0689519
4.23712	100.012	100.522	0.260228		0.0706186
4.33712	100.013	100.497	0.23446		0.0722853
4.43712	100.013	100.469	0.207425		0.0739519
4.53712	100.014	100.439	0.180783		0.0756186
4.63712	100.014	100.41	0.156689		0.0772853
4.73712	100.015	100.384	0.136099		0.0789519
4.83712	100.016	100.362	0.120179		0.0806186
4.93712	100.016	100.35	0.111298		0.0822853
5.03712	100.017	100.353	0.112755		0.0839519
5.13712	100.017	100.372	0.125496		0.0856186
5.23712	100.018	100.401	0.14706		0.0872853
5.33712	100.019	100.437	0.174973		0.0889519
5.43712	100.019	100.475	0.207905		0.0906186
5.53712	100.02	100.515	0.245071		0.0922853
5.63712	100.02	100.553	0.284246		0.0939519
5.73712	100.021	100.59	0.323526		0.0956186
5.83712	100.021	100.621	0.359989		0.0972853
5.93712	100.022	100.645	0.388394		0.0989519
6.03712	100.023	100.657	0.402403		0.100619
6.13712	100.023	100.656	0.400359		0.102285
6.23712	100.024	100.646	0.386921		0.103952
6.33712	100.024	100.631	0.367384		0.105619
6.43712	100.025	100.612	0.344998		0.107285
6.53712	100.026	100.593	0.321641		0.108952
6.63712	100.026	100.574	0.299935		0.110619
6.73712	100.027	100.556	0.28066		0.112285
6.83712	100.027	100.541	0.264064		0.113952
6.93712	100.028	100.528	0.250348		0.115619
7.03712	100.028	100.518	0.239573		0.117285
7.13712	100.029	100.51	0.231597		0.118952
7.23712	100.029	100.505	0.226092		0.120619
7.33712	100.03	100.502	0.222626		0.122285
7.43712	100.03	100.5	0.220766		0.123952
7.53712	100.031	100.5	0.220071		0.125619
7.63712	100.031	100.5	0.219596		0.127285
7.73712	100.032	100.5	0.219128		0.128952
7.83712	100.032	100.5	0.218665		0.130619
7.93712	100.033	100.5	0.218209		0.132285
8.03712	100.033	100.5	0.217758		0.133952
8.13712	100.034	100.5	0.217313		0.135619
8.23712	100.034	100.5	0.216875		0.137285
8.33712	100.035	100.5	0.216442		0.138952
8.43712	100.035	100.5	0.216015		0.140619
8.53712	100.036	100.5	0.215509		0.142285
8.63712	100.036	100.499	0.213841		0.143952
8.73712	100.037	100.495	0.210071		0.145619
8.83712	100.037	100.488	0.203125		0.147285
8.93712	100.037	100.475	0.191707		0.148952
9.03712	100.038	100.456	0.174999		0.150619
9.13712	100.038	100.43	0.153617		0.152285
9.23712	100.039	100.399	0.129533		0.153952
9.33712	100.039	100.363	0.104928		0.155619
9.43712	100.04	100.325	0.0814388		0.157285
9.53712	100.04	100.285	0.060188		0.158952
9.63712	100.04	100.247	0.0425366		0.160619
9.73712	100.041	100.21	0.0287704		0.162285
9.83712	100.041	100.179	0.0188921		0.163952
9.93712	100.041	100.155	0.0128282		0.165619
10.0371	100.042	100.143	0.0102344		0.167285
10.1371	100.042	100.144	0.0103692		0.168952
10.2371	100.043	100.154	0.0124542		0.170619
10.3371	100.043	100.169	0.0160208		0.172285
10.4371	100.043	100.188	0.0208531		0.173952
10.5371	100.044	100.208	0.0268597		0.175619
10.6371	100.044	100.229	0.0341844		0.177285
10.7371	100.044	100.253	0.0433982		0.178952
10.8371	100.045	100.28	0.0556219		0.180619
10.9371	100.045	100.315	0.0729024		0.182285
11.0371	100.045	100.359	0.0982127		0.183952
11.1371	100.046	100.412	0.134242		0.185619
11.2371	100.046	100.473	0.182133		0.187285
11.3371	100.046	100.538	0.241884		0.188952
11.4371	100.047	100.606	0.313197		0.190619
11.5371	100.047	100.676	0.395635		0.192285
11.6371	100.047	100.745	0.486708		0.193952
11.7371	100.048	100.812	0.583883		0.195619
11.8371	100.048	100.874	0.681968		0.197285
11.9371	100.048	100.924	0.766622		0.198952
12.0371	100.048	100.948	0.808892		0.200619
12.1371	100.049	100.943	0.79972		0.202285
12.2371	100.049	100.923	0.764018		0.203952
12.3371	100.049	100.897	0.718908		0.205619
12.4371	100.05	100.869	0.670863		0.207285
12.5371	100.05	100.839	0.622625		0.208952
12.6371	100.05	100.81	0.577808		0.210619
12.7371	100.05	100.784	0.538037		0.212285
12.8371	100.051	100.761	0.504723		0.213952
12.9371	100.051	100.744	0.479671		0.215619
13.0371	100.051	100.733	0.464307		0.217285
13.1371	100.052	100.729	0.458463		0.218952
13.2371	100.052	100.73	0.460294		0.220619
13.3371	100.052	100.736	0.467522		0.222285
13.4371	100.052	100.744	0.478365		0.223952
13.5371	100.053	100.754	0.491675		0.225619
13.6371	100.053	100.765	0.507348		0.227285
13.7371	100.053	100.779	0.526787		0.228952
13.8371	100.053	100.797	0.55265		0.230619
13.9371	100.054	100.821	0.589281		0.232285
14.0371	100.054	100.855	0.641777		0.233952
14.1371	100.054	100.898	0.712652		0.235619
14.2371	100.054	100.949	0.800386		0.237285
14.3371	100.055	101.004	0.902048		0.238952
14.4371	100.055	101.063	1.01537		0.240619
14.5371	100.055	101.122	1.13868		0.242285
14.6371	100.055	101.181	1.2677		0.243952
14.7371	100.056	101.238	1.39897		0.245619
14.8371	100.056	101.291	1.52529		0.247285
14.9371	100.056	101.33	1.62367		0.248952
15.0371	100.056	101.336	1.63752		0.250619
15.1371	100.057	101.303	1.55333		0.252285
15.2371	100.057	101.253	1.4298		0.253952
15.3371	100.057	101.196	1.29784		0.255619
15.4371	100.057	101.138	1.16705		0.257285
15.5371	100.057	101.078	1.04104		0.258952
15.6371	100.058	101.019	0.923887		0.260619
15.7371	100.058	100.962	0.817832		0.262285
15.8371	100.058	100.91	0.726437		0.263952
15.9371	100.058	100.87	0.658474		0.265619
16.0371	100.059	100.851	0.62856		0.267285
16.1371	100.059	100.857	0.637728		0.268952
16.2371	100.059	100.877	0.669315		0.270619
16.3371	100.059	100.903	0.711692		0.272285
16.4371	100.06	100.931	0.760115		0.273952
16.5371	100.06	100.961	0.812401		0.275619
16.6371	100.06	100.99	0.864549		0.277285
16.7371	100.06	101.016	0.913618		0.278952
16.8371	100.06	101.038	0.955323		0.280619
16.9371	100.061	101.052	0.982085		0.282285
17.0371	100.061	101.053	0.985082		0.283952
17.1371	100.061	101.042	0.962889		0.285619
17.2371	100.061	101.022	0.923379		0.287285
17.3371	100.061	100.997	0.874941		0.288952
17.4371	100.062	100.969	0.822626		0.290619
17.5371	100.062	100.939	0.769347		0.292285
17.6371	100.062	100.91	0.719449		0.293952
17.7371	100.062	100.884	0.674558		0.295619
17.8371	100.062	100.86	0.635647		0.297285
17.9371	100.063	100.84	0.603736		0.298952
18.0371	100.063	100.824	0.579433		0.300619
18.1371	100.063	100.813	0.562457		0.302285
18.2371	100.063	100.806	0.551642		0.303952
18.3371	100.063	100.802	0.545479		0.305619
18.4371	100.064	100.8	0.542622		0.307285
18.5371	100.064	100.8	0.541871		0.308952
18.6371	100.064	100.799	0.540568		0.310619
18.7371	100.064	100.798	0.537949		0.312285
18.8371	100.064	100.795	0.53386		0.313952
18.9371	100.065	100.791	0.528191		0.315619
19.0371	100.065	100.787	0.520891		0.317285
19.1371	100.065	100.781	0.511985		0.318952
19.2371	100.065	100.773	0.501576		0.320619
19.3371	100.065	100.765	0.489824		0.322285
19.4371	100.066	100.756	0.47693		0.323952
19.5371	100.066	100.746	0.46307		0.325619
19.6371	100.066	100.735	0.447741		0.327285
19.7371	100.066	100.722	0.429573		0.328952
19.8371	100.066	100.703	0.405658		0.330619
19.9371	100.066	100.675	0.369838		0.332285
20	100.067	100.647	0.337462		0.333333
20.009	100.067	100.643	0.332141		0.333483
20.0719	100.067	100.606	0.290786		0.334531
20.1719	100.067	100.533	0.217531		0.336198
20.2719	100.067	100.451	0.147422		0.337864
20.3719	100.067	100.364	0.0882286		0.339531
20.4719	100.067	100.275	0.0432168		0.341198
20.5719	100.068	100.186	0.0139371		0.342864
20.6719	100.068	100.097	0.000882766		0.344531
20.7719	100.068	100.012	0.0030966		0.346198
20.8719	100.068	99.9333	0.0181604		0.347864
20.9719	100.068	99.8675	0.0403083		0.349531
21.0719	100.068	99.8222	0.0606197		0.351198
21.1719	100.069	99.7949	0.0749149		0.352864
21.2719	100.069	99.7771	0.0850268		0.354531
21.3719	100.069	99.7639	0.0930224		0.356198
21.4719	100.069	99.7529	0.0999598		0.357864
21.5719	100.069	99.7428	0.106493		0.359531
21.6719	100.069	99.7328	0.113192		0.361198
21.7719	100.069	99.7228	0.120077		0.362864
21.8719	100.069	99.7128	0.12714		0.364531
21.9719	100.069	99.7028	0.134372		0.366198
22.0719	100.069	99.6928	0.141759		0.367864
22.1719	100.069	99.6828	0.149286		0.369531
22.2719	100.069	99.6728	0.156935		0.371198
22.3719	100.069	99.6628	0.164683		0.372864
22.4719	100.068	99.6528	0.172507		0.374531
22.5719	100.068	99.6425	0.180663		0.376198
22.6719	100.067	99.6305	0.190298		0.377864
22.7719	100.066	99.6155	0.202687		0.379531
22.8719	100.064	99.595	0.22036		0.381198
22.9719	100.063	99.565	0.24786		0.382864
23.0719	100.061	99.522	0.290393		0.384531
23.1719	100.059	99.4673	0.349681		0.386198
23.2719	100.056	99.405	0.423798		0.387864
23.3719	100.053	99.3385	0.510414		0.389531
23.4719	100.049	99.2696	0.607965		0.391198
23.5719	100.045	99.2	0.714421		0.392864
23.6719	100.041	99.132	0.825671		0.394531
23.7719	100.035	99.0662	0.939326		0.396198
23.8719	100.029	99.0035	1.05244		0.397864
23.9719	100.023	98.945	1.1617		0.399531
24.0719	100.015	98.891	1.26433		0.401198
24.1719	100.007	98.8414	1.35911		0.402864
24.2719	99.9982	98.7955	1.44641		0.404531
24.3719	99.9883	98.7524	1.5274		0.406198
24.4719	99.9775	98.7113	1.60326		0.407864
24.5719	99.9657	98.671	1.67645		0.409531
24.6719	99.9529	98.6294	1.75189		0.411198
24.7719	99.9391	98.5861	1.83081		0.412864
24.8719	99.9242	98.5406	1.91436		0.414531
24.9719	99.9082	98.4927	2.00366		0.416198
25.0719	99.891	98.4421	2.0994		0.417864
25.1719	99.8727	98.3889	2.20163		0.419531
25.2719	99.8531	98.3334	2.30973		0.421198
25.3719	99.8323	98.2759	2.42262		0.422864
25.4719	99.8103	98.2168	2.53907		0.424531
25.5719	99.7869	98.1567	2.65771		0.426198
25.6719	99.7623	98.0957	2.77747		0.427864
25.7719	99.7363	98.0338	2.89854		0.429531
25.8719	99.7089	97.9708	3.02113		0.431198
25.9719	99.6802	97.9067	3.14539		0.432864
26.0719	99.6501	97.8414	3.27136		0.434531
26.1719	99.6187	97.775	3.39891		0.436198
26.2719	99.5858	97.7075	3.52775		0.437864
26.3719	99.5515	97.639	3.65743		0.439531
26.4719	99.5158	97.5697	3.78741		0.441198
26.5719	99.4787	97.5	3.91519		0.442864
26.6719	99.4401	97.4316	4.03432		0.444531
26.7719	99.4002	97.3649	4.14249		0.446198
26.8719	99.3588	97.3003	4.23751		0.447864
26.9719	99.3161	97.2382	4.31741		0.449531
27.0719	99.2719	97.1788	4.38098		0.451198
27.1719	99.2263	97.122	4.42812		0.452864
27.2719	99.1794	97.0676	4.45975		0.454531
27.3719	99.1311	97.0151	4.47742		0.456198
27.4719	99.0814	96.9641	4.48282		0.457864
27.5719	99.0303	96.9137	4.4801		0.459531
27.6719	98.978	96.8617	4.47876		0.461198
27.7719	98.9243	96.8067	4.48413		0.462864
27.8719	98.8693	96.7469	4.50467		0.464531
27.9719	98.813	96.6794	4.55231		0.466198
28.0719	98.7555	96.6022	4.63649		0.467864
28.1719	98.6967	96.516	4.7554		0.469531
28.2719	98.6367	96.4234	4.89862		0.471198
28.3719	98.5755	96.3269	5.0561		0.472864
28.4719	98.5131	96.2281	5.22127		0.474531
28.5719	98.4496	96.1281	5.38902		0.476198
28.6719	98.3849	96.0281	5.55432		0.477864
28.7719	98.3191	95.9281	5.71684		0.479531
28.8719	98.2523	95.8281	5.87646		0.481198
28.9719	98.1844	95.7281	6.0331		0.482864
29.0719	98.1154	95.6281	6.18667		0.484531
29.1719	98.0455	95.5281	6.33713		0.486198
29.2719	97.9746	95.4281	6.48442		0.487864
29.3719	97.9027	95.3281	6.6285		0.489531
29.4719	97.8299	95.2281	6.76936		0.491198
29.5719	97.7562	95.1285	6.90521		0.492864
29.6719	97.6817	95.0305	7.02894		0.494531
29.7719	97.6063	94.9355	7.13318		0.496198
29.8719	97.5301	94.846	7.20429		0.497864
29.9719	97.4531	94.766	7.22036		0.499531
30.0719	97.3753	94.6989	7.16303		0.501198
30.1719	97.2968	94.6436	7.03929		0.502864
30.2719	97.2176	94.5959	6.87299		0.504531
30.3719	97.1377	94.5524	6.6833		0.506198
30.4719	97.0571	94.5113	6.48101		0.507864
30.5719	96.9759	94.471	6.2743		0.509531
30.6719	96.8941	94.4296	6.07371		0.511198
30.7719	96.8117	94.3855	5.88614		0.512864
30.8719	96.7287	94.335	5.72987		0.514531
30.9719	96.6452	94.2655	5.66312		0.516198
31.0719	96.5612	94.1559	5.78525		0.517864
31.1719	96.4767	94.0146	6.06159		0.519531
31.2719	96.3917	93.8615	6.40168		0.521198
31.3719	96.3062	93.7042	6.77077		0.522864
31.4719	96.2204	93.545	7.15783		0.524531
31.5719	96.1341	93.3852	7.55639		0.526198
31.6719	96.0475	93.2267	7.95688		0.527864
31.7719	95.9605	93.0707	8.35059		0.529531
31.8719	95.8731	92.9213	8.71338		0.531198
31.9719	95.7855	92.7908	8.96792		0.532864
32.0719	95.6975	92.7004	8.98275		0.534531
32.1719	95.6092	92.6416	8.80646		0.536198
32.2719	95.5207	92.5947	8.56103		0.537864
32.3719	95.4319	92.5521	8.29316		0.539531
32.4719	95.3428	92.5113	8.01774		0.541198
32.5719	95.2536	92.4709	7.74332		0.542864
32.6719	95.1641	92.4289	7.48152		0.544531
32.7719	95.0745	92.3839	7.23938		0.546198
32.8719	94.9847	92.3334	7.02938		0.547864
32.9719	94.8947	92.2734	6.87134		0.549531
33.0719	94.8046	92.2005	6.78144		0.551198
33.1719	94.7143	92.1158	6.75258		0.552864
33.2719	94.624	92.0235	6.76263		0.554531
33.3719	94.5335	91.9269	6.79408		0.556198
33.4719	94.4429	91.8281	6.83732		0.557864
33.5719	94.3523	91.7285	6.88418		0.559531
33.6719	94.2615	91.6304	6.92285		0.561198
33.7719	94.1707	91.5346	6.94921		0.562864
33.8719	94.0799	91.442	6.95863		0.564531
33.9719	93.989	91.3534	6.94642		0.566198
34.0719	93.8981	91.2694	6.90992		0.567864
34.1719	93.8071	91.1898	6.8502		0.569531
34.2719	93.7162	91.114	6.77146		0.571198
34.3719	93.6252	91.0409	6.67884		0.572864
34.4719	93.5343	90.9697	6.57677		0.574531
34.5719	93.4433	90.8999	6.46901		0.576198
34.6719	93.3524	90.8309	6.35798		0.577864
34.7719	93.2615	90.7628	6.24334		0.579531
34.8719	93.1706	90.6958	6.12472		0.581198
34.9719	93.0798	90.6299	6.00193		0.582864
35.0719	92.989	90.5651	5.87497		0.584531
35.1719	92.8982	90.5015	5.74411		0.586198
35.2719	92.8075	90.439	5.6098		0.587864
35.3719	92.7169	90.3775	5.47269		0.589531
35.4719	92.6263	90.3169	5.33347		0.591198
35.5719	92.5358	90.2565	5.19527		0.592864
35.6719	92.4454	90.1946	5.06611		0.594531
35.7719	92.3551	90.1304	4.94914		0.596198
35.8719	92.2648	90.0631	4.84783		0.597864
35.9719	92.1747	89.9916	4.76565		0.599531
36.0719	92.0846	89.9156	4.70445		0.601198
36.1719	91.9946	89.8352	4.66314		0.602864
36.2719	91.9047	89.751	4.63832		0.604531
36.3719	91.8149	89.6641	4.62589		0.606198
36.4719	91.7252	89.5753	4.62238		0.607864
36.5719	91.6357	89.485	4.62548		0.609531
36.6719	91.5462	89.3931	4.636		0.611198
36.7719	91.4568	89.2989	4.65691		0.612864
36.8719	91.3676	89.2015	4.69208		0.614531
36.9719	91.2785	89.1001	4.74555		0.616198
37.0719	91.1895	88.994	4.81996		0.617864
37.1719	91.1006	88.8836	4.9151		0.619531
37.2719	91.0118	88.7695	5.02825		0.621198
37.3719	90.9232	88.6526	5.15582		0.622864
37.4719	90.8347	88.5337	5.29461		0.624531
37.5719	90.7463	88.414	5.43968		0.626198
37.6719	90.6581	88.2957	5.5811		0.627864
37.7719	90.57	88.1801	5.71151		0.629531
37.8719	90.482	88.0711	5.8126		0.631198
37.9719	90.3941	87.9783	5.83618		0.632864
38.0719	90.3064	87.9153	5.71767		0.634531
38.1719	90.2189	87.8769	5.48477		0.636198
38.2719	90.1314	87.8495	5.2071		0.637864
38.3719	90.0441	87.8266	4.91757		0.639531
38.4719	89.957	87.8057	4.62815		0.641198
38.5719	89.87	87.7854	4.34537		0.642864
38.6719	89.7831	87.764	4.07658		0.644531
38.7719	89.6964	87.7402	3.82668		0.646198
38.8719	89.6098	87.7099	3.60955		0.647864
38.9719	89.5233	87.6595	3.47385		0.649531
39.0719	89.4371	87.5635	3.51003		0.651198
39.1719	89.3509	87.4323	3.68124		0.652864
39.2719	89.2649	87.2889	3.90467		0.654531
39.3719	89.1791	87.1414	4.15205		0.656198
39.4719	89.0934	86.9922	4.41505		0.657864
39.5719	89.0078	86.8426	4.68838		0.659531
39.6719	88.9224	86.6946	4.96323		0.661198
39.7719	88.8372	86.5493	5.23434		0.662864
39.8719	88.7521	86.4081	5.49414		0.664531
39.9719	88.6672	86.2728	5.73318		0.666198
40.0719	88.5824	86.1443	5.94423		0.667864
40.1719	88.4977	86.0224	6.12726		0.669531
40.2719	88.4133	85.9056	6.28845		0.671198
40.3719	88.329	85.7922	6.43516		0.672864
40.4719	88.2448	85.681	6.57302		0.674531
40.5719	88.1608	85.5713	6.70543		0.676198
40.6719	88.0769	85.4634	6.83081		0.677864
40.7719	87.9932	85.3583	6.94287		0.679531
40.8719	87.9097	85.2582	7.03079		0.681198
40.9719	87.8263	85.1656	7.07945		0.682864
41.0719	87.7431	85.0828	7.0774		0.684531
41.1719	87.6601	85.009	7.02817		0.686198
41.2719	87.5772	84.9416	6.9463		0.687864
41.3719	87.4945	84.8781	6.84534		0.689531
41.4719	87.4119	84.8169	6.73393		0.691198
41.5719	87.3295	84.7566	6.61999		0.692864
41.6719	87.2473	84.695	6.51418		0.694531
41.7719	87.1652	84.6317	6.41874		0.696198
41.8719	87.0833	84.5662	6.33554		0.697864
41.9719	87.0016	84.4983	6.26614		0.699531
42.0719	86.92	84.4277	6.21125		0.701198
42.1719	86.8386	84.3545	6.17044		0.702864
42.2719	86.7573	84.279	6.14218		0.704531
42.3719	86.6763	84.2015	6.12445		0.706198
42.4719	86.5954	84.1225	6.1152		0.707864
42.5719	86.5146	84.0427	6.11036		0.709531
42.6719	86.4341	83.9637	6.10267		0.711198
42.7719	86.3537	83.8856	6.09119		0.712864
42.8719	86.2734	83.8086	6.07541		0.714531
42.9719	86.1934	83.7327	6.05497		0.716198
43.0719	86.1135	83.6579	6.02972		0.717864
43.1719	86.0338	83.5844	5.99974		0.719531
43.2719	85.9543	83.5118	5.96535		0.721198
43.3719	85.8749	83.4403	5.92702		0.722864
43.4719	85.7957	83.3697	5.88536		0.724531
43.5719	85.7167	83.2995	5.8428		0.726198
43.6719	85.6378	83.2285	5.80491		0.727864
43.7719	85.5592	83.1566	5.77251		0.729531
43.8719	85.4807	83.0836	5.74604		0.731198
43.9719	85.4024	83.0095	5.72584		0.732864
44.0719	85.3242	82.9343	5.71207		0.734531
44.1719	85.2463	82.8578	5.70464		0.736198
44.2719	85.1685	82.7804	5.70328		0.737864
44.3719	85.0909	82.7019	5.70755		0.739531
44.4719	85.0135	82.6225	5.71692		0.741198
44.5719	84.9362	82.5428	5.72853		0.742864
44.6719	84.8592	82.4644	5.73497		0.744531
44.7719	84.7823	82.3877	5.73406		0.746198
44.8719	84.7056	82.3131	5.72384		0.747864
44.9719	84.6291	82.2411	5.70263		0.749531
45.0719	84.5527	82.1716	5.66959		0.751198
45.1719	84.4766	82.1049	5.62509		0.752864
45.2719	84.4006	82.0404	5.57056		0.754531
45.3719	84.3248	81.9779	5.50802		0.756198
45.4719	84.2492	81.9169	5.4395		0.757864
45.5719	84.1738	81.8569	5.36799		0.759531
45.6719	84.0985	81.7969	5.29758		0.761198
45.7719	84.0235	81.7369	5.22849		0.762864
45.8719	83.9486	81.6769	5.16069		0.764531
45.9719	83.8739	81.6169	5.09416		0.766198
46.0719	83.7994	81.5569	5.02889		0.767864
46.1719	83.7251	81.4969	4.96487		0.769531
46.2719	83.6509	81.4369	4.90208		0.771198
46.3719	83.577	81.3769	4.84051		0.772864
46.4719	83.5032	81.3169	4.78014		0.774531
46.5719	83.4297	81.2571	4.7201		0.776198
46.6719	83.3563	81.1981	4.65782		0.777864
46.7719	83.2831	81.14	4.59273		0.779531
46.8719	83.21	81.083	4.52445		0.781198
46.9719	83.1372	81.0271	4.45274		0.782864
47.0719	83.0646	80.9723	4.37753		0.784531
47.1719	82.9921	80.9187	4.29898		0.786198
47.2719	82.9199	80.8662	4.21743		0.787864
47.3719	82.8478	80.8147	4.13335		0.789531
47.4719	82.7759	80.7641	4.0473		0.791198
47.5719	82.7042	80.7138	3.96176		0.792864
47.6719	82.6327	80.6622	3.88285		0.794531
47.7719	82.5613	80.6089	3.81216		0.796198
47.8719	82.4902	80.5534	3.75108		0.797864
47.9719	82.4193	80.4955	3.70077		0.799531
48.0719	82.3485	80.4349	3.66173		0.801198
48.1719	82.2779	80.3717	3.6336		0.802864
48.2719	82.2075	80.3062	3.61518		0.804531
48.3719	82.1373	80.2387	3.60492		0.806198
48.4719	82.0673	80.1696	3.60123		0.807864
48.5719	81.9975	80.0999	3.60101		0.809531
48.6719	81.9279	80.0309	3.59866		0.811198
48.7719	81.8585	79.9628	3.59347		0.812864
48.8719	81.7892	79.8958	3.58505		0.814531
48.9719	81.7201	79.8299	3.5731		0.816198
49.0719	81.6513	79.7651	3.55752		0.817864
49.1719	81.5826	79.7015	3.53836		0.819531
49.2719	81.5141	79.639	3.51586		0.821198
49.3719	81.4458	79.5775	3.49041		0.822864
49.4719	81.3777	79.5169	3.46244		0.824531
49.5719	81.3097	79.4565	3.43439		0.826198
49.6719	81.242	79.3946	3.41281		0.827864
49.7719	81.1745	79.3304	3.40045		0.829531
49.8719	81.1071	79.2631	3.40048		0.831198
49.9719	81.0399	79.1916	3.41618		0.832864
50.0719	80.9729	79.1156	3.44964		0.834531
50.1719	80.9061	79.0352	3.5005		0.836198
50.2719	80.8395	78.951	3.56637		0.837864
50.3719	80.7731	78.8641	3.64412		0.839531
50.4719	80.7069	78.7753	3.73103		0.841198
50.5719	80.6408	78.6856	3.82269		0.842864
50.6719	80.5749	78.5976	3.91005		0.844531
50.7719	80.5093	78.5125	3.98705		0.846198
50.8719	80.4438	78.4334	4.04165		0.847864
50.9719	80.3785	78.3656	4.05162		0.849531
51.0719	80.3134	78.3144	3.99593		0.851198
51.1719	80.2484	78.2779	3.88293		0.852864
51.2719	80.1837	78.2501	3.73865		0.854531
51.3719	80.1191	78.2268	3.58113		0.856198
51.4719	80.0548	78.2057	3.41919		0.857864
51.5719	79.9906	78.1853	3.25913		0.859531
51.6719	79.9266	78.1633	3.10927		0.861198
51.7719	79.8628	78.1383	2.97395		0.862864
51.8719	79.7992	78.1078	2.86079		0.864531
51.9719	79.7357	78.0678	2.78204		0.866198
52.0719	79.6724	78.0148	2.74765		0.867864
52.1719	79.6094	77.9501	2.75305		0.869531
52.2719	79.5465	77.8778	2.78438		0.871198
52.3719	79.4838	77.8013	2.83067		0.872864
52.4719	79.4212	77.7225	2.88589		0.874531
52.5719	79.3589	77.6428	2.94499		0.876198
52.6719	79.2967	77.5644	3.00103		0.877864
52.7719	79.2348	77.4877	3.05223		0.879531
52.8719	79.173	77.4131	3.09703		0.881198
52.9719	79.1114	77.3411	3.13399		0.882864
53.0719	79.0499	77.2716	3.16231		0.884531
53.1719	78.9887	77.2049	3.18206		0.886198
53.2719	78.9276	77.1404	3.19415		0.887864
53.3719	78.8667	77.0779	3.19993		0.889531
53.4719	78.806	77.0169	3.20086		0.891198
53.5719	78.7455	76.9572	3.19789		0.892864
53.6719	78.6851	76.8991	3.18982		0.894531
53.7719	78.625	76.8433	3.17422		0.896198
53.8719	78.565	76.7907	3.14805		0.897864
53.9719	78.5052	76.7421	3.10829		0.899531
54.0719	78.4455	76.6982	3.05336		0.901198
54.1719	78.3861	76.6586	2.98422		0.902864
54.2719	78.3268	76.6227	2.9039		0.904531
54.3719	78.2677	76.5896	2.81597		0.906198
54.4719	78.2088	76.5585	2.72348		0.907864
54.5719	78.15	76.5282	2.63023		0.909531
54.6719	78.0915	76.4973	2.54154		0.911198
54.7719	78.0331	76.4653	2.45786		0.912864
54.8719	77.9749	76.4323	2.37935		0.914531
54.9719	77.9168	76.3983	2.30604		0.916198
55.0719	77.859	76.363	2.23787		0.917864
55.1719	77.8013	76.3266	2.17462		0.919531
55.2719	77.7437	76.2891	2.11597		0.921198
55.3719	77.6864	76.2506	2.06148		0.922864
55.4719	77.6292	76.2112	2.01071		0.924531
55.5719	77.5722	76.1711	1.96326		0.926198
55.6719	77.5154	76.1301	1.91914		0.927864
55.7719	77.4587	76.0881	1.87856		0.929531
55.8719	77.4023	76.0452	1.84171		0.931198
55.9719	77.3459	76.0011	1.8087		0.932864
56.0719	77.2898	75.9558	1.77954		0.934531
56.1719	77.2338	75.9094	1.75411		0.936198
56.2719	77.178	75.8619	1.73218		0.937864
56.3719	77.1224	75.8134	1.71345		0.939531
56.4719	77.0669	75.764	1.69758		0.941198
56.5719	77.0117	75.7137	1.68465		0.942864
56.6719	76.9565	75.6618	1.67632		0.944531
56.7719	76.9016	75.6076	1.67438		0.946198
56.8719	76.8468	75.5502	1.68107		0.947864
56.9719	76.7922	75.4888	1.69878		0.949531
57.0719	76.7377	75.4228	1.72906		0.951198
57.1719	76.6834	75.3524	1.77182		0.952864
57.2719	76.6293	75.2782	1.82549		0.954531
57.3719	76.5754	75.2013	1.88803		0.956198
57.4719	76.5216	75.1225	1.95757		0.957864
57.5719	76.468	75.0429	2.03092		0.959531
57.6719	76.4145	74.9649	2.10136		0.961198
57.7719	76.3612	74.8896	2.16559		0.962864
57.8719	76.3081	74.8184	2.21905		0.964531
57.9719	76.2551	74.7531	2.2562		0.966198
58.0719	76.2023	74.6946	2.27323		0.967864
58.1719	76.1497	74.6427	2.27094		0.969531
58.2719	76.0972	74.5959	2.25392		0.971198
58.3719	76.0449	74.5525	2.22724		0.972864
58.4719	75.9927	74.5113	2.19464		0.974531
58.5719	75.9407	74.4711	2.15998		0.976198
58.6719	75.8889	74.4301	2.12823		0.977864
58.7719	75.8372	74.3881	2.09989		0.979531
58.8719	75.7857	74.3452	2.07522		0.981198
58.9719	75.7344	74.3011	2.05436		0.982864
59.0719	75.6832	74.2558	2.03736		0.984531
59.1719	75.6321	74.2094	2.02415		0.986198
59.2719	75.5813	74.1619	2.01454		0.987864
59.3719	75.5305	74.1134	2.00822		0.989531
59.4719	75.48	74.064	2.00487		0.991198
59.5719	75.4296	74.0141	2.00364		0.992864
59.6719	75.3793	73.9641	2.00293		0.994531
59.7719	75.3292	73.9141	2.00266		0.996198
59.8719	75.2793	73.8641	2.00283		0.997864
59.9719	75.2295	73.8141	2.00344		0.999531
60.0719	75.1799	73.7641	2.00448		1.0012
60.1719	75.1304	73.7141	2.00596		1.00286
60.2719	75.0811	73.6641	2.00788		1.00453
60.3719	75.0319	73.6141	2.01024		1.0062
60.4719	74.9829	73.5641	2.01303		1.00786
60.5719	74.934	73.5143	2.01569		1.00953
60.6719	74.8853	73.4653	2.01654		1.0112
60.7719	74.8367	73.4172	2.01514		1.01286
60.8719	74.7883	73.3702	2.01122		1.01453
60.9719	74.7401	73.3243	2.00455		1.0162
61.0719	74.692	73.2795	1.99504		1.01786
61.1719	74.644	73.2359	1.98273		1.01953
61.2719	74.5962	73.1934	1.96783		1.0212
61.3719	74.5485	73.1519	1.9506		1.02286
61.4719	74.501	73.1113	1.93138		1.02453
61.5719	74.4537	73.0716	1.91009		1.0262
61.6719	74.4064	73.0335	1.88495		1.02786
61.7719	74.3594	72.9977	1.85413		1.02953
61.8719	74.3125	72.9651	1.81541		1.0312
61.9719	74.2657	72.9365	1.76669		1.03286
62.0719	74.219	72.9125	1.707		1.03453
62.1719	74.1726	72.893	1.63737		1.0362
62.2719	74.1262	72.8771	1.56032		1.03786
62.3719	74.08	72.864	1.47874		1.03953
62.4719	74.034	72.8529	1.39504		1.0412
62.5719	73.9881	72.8425	1.31243		1.04286
62.6719	73.9423	72.8304	1.23634		1.04453
62.7719	73.8967	72.8154	1.1691		1.0462
62.8719	73.8512	72.7956	1.11431		1.04786
62.9719	73.8059	72.7681	1.07691		1.04953
63.0719	73.7607	72.731	1.06033		1.0512
63.1719	73.7156	72.6847	1.06274		1.05286
63.2719	73.6707	72.6321	1.07864		1.05453
63.3719	73.6259	72.5756	1.10314		1.0562
63.4719	73.5813	72.5168	1.13314		1.05786
63.5719	73.5368	72.4572	1.16563		1.05953
63.6719	73.4925	72.3988	1.19618		1.0612
63.7719	73.4483	72.3421	1.22363		1.06286
63.8719	73.4042	72.2875	1.24695		1.06453
63.9719	73.3602	72.2354	1.26521		1.0662
64.0719	73.3164	72.186	1.27786		1.06786
64.1719	73.2728	72.1392	1.28495		1.06953
64.2719	73.2293	72.0948	1.28705		1.0712
64.3719	73.1859	72.0523	1.28504		1.07286
64.4719	73.1426	72.0113	1.27985		1.07453
64.5719	73.0995	71.9716	1.27222		1.0762
64.6719	73.0565	71.9331	1.26192		1.07786
64.7719	73.0136	71.8965	1.24812		1.07953
64.8719	72.9709	71.8619	1.22998		1.0812
64.9719	72.9283	71.8298	1.2068		1.08286
65.0719	72.8859	71.8004	1.17832		1.08453
65.1719	72.8436	71.7736	1.14486		1.0862
65.2719	72.8014	71.7491	1.10723		1.08786
65.3719	72.7593	71.7266	1.06647		1.08953
65.4719	72.7174	71.7057	1.02363		1.0912
65.5719	72.6756	71.6853	0.980782		1.09286
65.6719	72.634	71.6634	0.942052		1.09453
65.7719	72.5924	71.6392	0.908716		1.0962
65.8719	72.551	71.6118	0.882162		1.09786
65.9719	72.5098	71.5804	0.86377		1.09953
66.0719	72.4686	71.5444	0.854266		1.1012
66.1719	72.4276	71.5039	0.85321		1.10286
66.2719	72.3867	71.4598	0.859215		1.10453
66.3719	72.346	71.4129	0.870635		1.1062
66.4719	72.3053	71.364	0.886069		1.10786
66.5719	72.2648	71.3144	0.903367		1.10953
66.6719	72.2244	71.266	0.918697		1.1112
66.7719	72.1842	71.2193	0.931087		1.11286
66.8719	72.1441	71.1747	0.939678		1.11453
66.9719	72.1041	71.1326	0.943722		1.1162
67.0719	72.0642	71.0932	0.942819		1.11786
67.1719	72.0244	71.0564	0.937085		1.11953
67.2719	71.9848	71.022	0.927094		1.1212
67.3719	71.9453	70.9895	0.913668		1.12286
67.4719	71.9059	70.9585	0.897652		1.12453
67.5719	71.8667	70.9281	0.88093		1.1262
67.6719	71.8275	70.8962	0.867418		1.12786
67.7719	71.7885	70.862	0.85848		1.12953
67.8719	71.7496	70.8246	0.855662		1.1312
67.9719	71.7109	70.7832	0.860586		1.13286
68.0719	71.6722	70.7372	0.874305		1.13453
68.1719	71.6337	70.6867	0.896725		1.1362
68.2719	71.5953	70.6326	0.926745		1.13786
68.3719	71.557	70.5757	0.962918		1.13953
68.4719	71.5188	70.5168	1.00396		1.1412
68.5719	71.4808	70.4572	1.04771		1.14286
68.6719	71.4428	70.399	1.08955		1.14453
68.7719	71.405	70.3438	1.12611		1.1462
68.8719	71.3673	70.2949	1.15011		1.14786
68.9719	71.3297	70.259	1.14638		1.14953
69.0719	71.2923	70.2438	1.09935		1.1512
69.1719	71.2549	70.2464	1.01704		1.15286
69.2719	71.2177	70.2587	0.919652		1.15453
69.3719	71.1806	70.2754	0.819242		1.1562
69.4719	71.1436	70.2944	0.721049		1.15786
69.5719	71.1067	70.314	0.628301		1.15953
69.6719	71.0699	70.332	0.544551		1.1612
69.7719	71.0332	70.347	0.470925		1.16286
69.8719	70.9967	70.3572	0.409003		1.16453
69.9719	70.9603	70.3597	0.360687		1.1662
70.0719	70.924	70.3525	0.326532		1.16786
70.1719	70.8877	70.3363	0.304089		1.16953
70.2719	70.8517	70.3137	0.289388		1.1712
70.3719	70.8157	70.2872	0.279274		1.17286
70.4719	70.7798	70.2584	0.271867		1.17453
70.5719	70.744	70.2282	0.266045		1.1762
70.6719	70.7084	70.1973	0.261262		1.17786
70.7719	70.6729	70.1653	0.257585		1.17953
70.8719	70.6374	70.1323	0.255099		1.1812
70.9719	70.6021	70.0983	0.253864		1.18286
71.0719	70.5669	70.063	0.253908		1.18453
71.1719	70.5318	70.0266	0.25522		1.1862
71.2719	70.4968	69.9891	0.257753		1.18786
71.3719	70.4619	69.9506	0.261431		1.18953
71.4719	70.4271	69.9112	0.266161		1.1912
71.5719	70.3925	69.8713	0.271658		1.19286
71.6719	70.3579	69.8313	0.277354		1.19453
71.7719	70.3234	69.7913	0.283222		1.1962
71.8719	70.2891	69.7513	0.289266		1.19786
71.9719	70.2548	69.7113	0.295489		1.19953
72.0719	70.2207	69.6713	0.301894		1.2012
72.1719	70.1867	69.6313	0.308484		1.20286
72.2719	70.1527	69.5913	0.315263		1.20453
72.3719	70.1189	69.5513	0.322234		1.2062
72.4719	70.0852	69.5113	0.329401		1.20786
72.5719	70.0516	69.4713	0.336766		1.20953
72.6719	70.0181	69.4313	0.344334		1.2112
72.7719	69.9846	69.3913	0.352108		1.21286
72.8719	69.9513	69.3513	0.360092		1.21453
72.9719	69.9181	69.3113	0.368289		1.2162
73.0719	69.885	69.2713	0.376703		1.21786
73.1719	69.852	69.2313	0.385339		1.21953
73.2719	69.8191	69.1913	0.394199		1.2212
73.3719	69.7863	69.1513	0.403287		1.22286
73.4719	69.7536	69.1113	0.412608		1.22453
73.5719	69.721	69.0715	0.421909		1.2262
73.6719	69.6885	69.0324	0.430403		1.22786
73.7719	69.6561	68.9944	0.437869		1.22953
73.8719	69.6238	68.9573	0.44414		1.2312
73.9719	69.5916	68.9214	0.449082		1.23286
74.0719	69.5595	68.8867	0.452624		1.23453
74.1719	69.5275	68.8531	0.454762		1.2362
74.2719	69.4955	68.8206	0.455562		1.23786
74.3719	69.4637	68.7891	0.455143		1.23953
74.4719	69.432	68.7585	0.453657		1.2412
74.5719	69.4004	68.7288	0.451048		1.24286
74.6719	69.3689	68.7007	0.446444		1.24453
74.7719	69.3374	68.6749	0.438948		1.2462
74.8719	69.3061	68.6523	0.427489		1.24786
74.9719	69.2749	68.6337	0.411084		1.24953
75.0719	69.2437	68.6197	0.389374		1.2512
75.1719	69.2127	68.6102	0.363013		1.25286
75.2719	69.1817	68.6043	0.333412		1.25453
75.3719	69.1508	68.6012	0.302124		1.2562
75.4719	69.1201	68.6001	0.270425		1.25786
75.5719	69.0894	68.5996	0.239856		1.25953
75.6719	69.0588	68.5976	0.212727		1.2612
75.7719	69.0283	68.5926	0.189829		1.26286
75.8719	68.9979	68.5828	0.172336		1.26453
75.9719	68.9676	68.5653	0.161843		1.2662
76.0719	68.9374	68.5381	0.159407		1.26786
76.1719	68.9073	68.5019	0.164311		1.26953
76.2719	68.8772	68.4593	0.174657		1.2712
76.3719	68.8473	68.4128	0.188769		1.27286
76.4719	68.8175	68.364	0.205607		1.27453
76.5719	68.7877	68.3144	0.224036		1.2762
76.6719	68.758	68.266	0.242123		1.27786
76.7719	68.7284	68.2193	0.259254		1.27953
76.8719	68.6989	68.1747	0.274831		1.2812
76.9719	68.6695	68.1326	0.288284		1.28286
77.0719	68.6402	68.0932	0.299225		1.28453
77.1719	68.611	68.0564	0.307559		1.2862
77.2719	68.5818	68.022	0.313478		1.28786
77.3719	68.5528	67.9895	0.317355		1.28953
77.4719	68.5238	67.9585	0.319611		1.2912
77.5719	68.4949	67.9287	0.320586		1.29286
77.6719	68.4662	67.9003	0.320149		1.29453
77.7719	68.4374	67.8736	0.317873		1.2962
77.8719	68.4088	67.8491	0.313317		1.29786
77.9719	68.3803	67.827	0.306135		1.29953
78.0719	68.3518	67.8076	0.296213		1.3012
78.1719	68.3235	67.7908	0.28375		1.30286
78.2719	68.2952	67.7763	0.269208		1.30453
78.3719	68.267	67.7638	0.253171		1.3062
78.4719	68.2389	67.7529	0.236208		1.30786
78.5719	68.2108	67.7425	0.219332		1.30953
78.6719	68.1829	67.7309	0.20428		1.3112
78.7719	68.155	67.7176	0.191333		1.31286
78.8719	68.1272	67.7022	0.180683		1.31453
78.9719	68.0995	67.6843	0.172462		1.3162
79.0719	68.0719	67.6637	0.166674		1.31786
79.1719	68.0444	67.6405	0.163158		1.31953
79.2719	68.0169	67.6149	0.161622		1.3212
79.3719	67.9896	67.5874	0.16172		1.32286
79.4719	67.9623	67.5584	0.163125		1.32453
79.5719	67.9351	67.5284	0.16535		1.3262
79.6719	67.9079	67.4984	0.167693		1.32786
79.7719	67.8809	67.4684	0.170118		1.32953
79.8719	67.8539	67.4384	0.172627		1.3312
79.9719	67.827	67.4084	0.175221		1.33286
80.0719	67.8002	67.3784	0.177901		1.33453
80.1719	67.7735	67.3484	0.180668		1.3362
80.2719	67.7468	67.3184	0.183525		1.33786
80.3719	67.7203	67.2884	0.186471		1.33953
80.4719	67.6938	67.2584	0.189509		1.3412
80.5719	67.6673	67.2287	0.192375		1.34286
80.6719	67.641	67.2003	0.194192		1.34453
80.7719	67.6147	67.1736	0.194571		1.3462
80.8719	67.5886	67.1491	0.193144		1.34786
80.9719	67.5624	67.127	0.189622		1.34953
81.0719	67.5364	67.1076	0.183898		1.3512
81.1719	67.5105	67.0908	0.176123		1.35286
81.2719	67.4846	67.0763	0.166661		1.35453
81.3719	67.4588	67.0638	0.155978		1.3562
81.4719	67.433	67.0529	0.144534		1.35786
81.5719	67.4074	67.0428	0.132907		1.35953
81.6719	67.3818	67.0328	0.12179		1.3612
81.7719	67.3563	67.0228	0.111207		1.36286
81.8719	67.3309	67.0128	0.101153		1.36453
81.9719	67.3055	67.0028	0.0916192		1.3662
82.0719	67.2802	66.9928	0.0826		1.36786
82.1719	67.255	66.9828	0.0740879		1.36953
82.2719	67.2299	66.9728	0.0660762		1.3712
82.3719	67.2048	66.9628	0.0585582		1.37286
82.4719	67.1798	66.9528	0.051527		1.37453
82.5719	67.1549	66.9425	0.0451284		1.3762
82.6719	67.13	66.9304	0.0398507		1.37786
82.7719	67.1053	66.9157	0.0359368		1.37953
82.8719	67.0806	66.8969	0.0337399		1.3812
82.9719	67.0559	66.8723	0.0337333		1.38286
83.0719	67.0314	66.8407	0.0363461		1.38453
83.1719	67.0069	66.8026	0.0417282		1.3862
83.2719	66.9825	66.7594	0.0497432		1.38786
83.3719	66.9581	66.7128	0.0601622		1.38953
83.4719	66.9338	66.664	0.0727965		1.3912
83.5719	66.9096	66.6144	0.0871694		1.39286
83.6719	66.8855	66.566	0.102088		1.39453
83.7719	66.8614	66.5193	0.117055		1.3962
83.8719	66.8374	66.4747	0.13155		1.39786
83.9719	66.8135	66.4326	0.145046		1.39953
84.0719	66.7896	66.3932	0.157129		1.4012
84.1719	66.7658	66.3564	0.167602		1.40286
84.2719	66.7421	66.322	0.176498		1.40453
84.3719	66.7184	66.2895	0.184008		1.4062
84.4719	66.6948	66.2585	0.190388		1.40786
84.5719	66.6713	66.2288	0.195807		1.40953
84.6719	66.6478	66.2008	0.199797		1.4112
84.7719	66.6244	66.1758	0.201272		1.41286
84.8719	66.6011	66.1556	0.198443		1.41453
84.9719	66.5779	66.1431	0.188998		1.4162
85.0719	66.5547	66.1403	0.171703		1.41786
85.1719	66.5315	66.1465	0.148244		1.41953
85.2719	66.5085	66.1591	0.122055		1.4212
85.3719	66.4855	66.1756	0.0960192		1.42286
85.4719	66.4625	66.1944	0.0718899		1.42453
85.5719	66.4397	66.214	0.050925		1.4262
85.6719	66.4169	66.232	0.0341895		1.42786
85.7719	66.3941	66.2473	0.0215755		1.42953
85.8719	66.3715	66.2584	0.0127762		1.4312
85.9719	66.3489	66.2638	0.00723145		1.43286
86.0719	66.3263	66.2623	0.00410044		1.43453
86.1719	66.3038	66.2542	0.00246733		1.4362
86.2719	66.2814	66.241	0.00163469		1.43786
86.3719	66.2591	66.2244	0.0012023		1.43953
86.4719	66.2368	66.2056	0.00097282		1.4412
86.5719	66.2145	66.1856	0.000835691		1.44286
86.6719	66.1924	66.1656	0.000715057		1.44453
86.7719	66.1703	66.1456	0.00060688		1.4462
86.8719	66.1482	66.1256	0.000510362		1.44786
86.9719	66.1262	66.1056	0.000424737		1.44953
87.0719	66.1043	66.0856	0.000349263		1.4512
87.1719	66.0825	66.0656	0.000283223		1.45286
87.2719	66.0607	66.0456	0.000225928		1.45453
87.3719	66.0389	66.0256	0.000176713		1.4562
87.4719	66.0172	66.0056	0.00013494		1.45786
87.5719	65.9956	65.9853	0.000107301		1.45953
87.6719	65.9741	65.9632	0.000117549		1.4612
87.7719	65.9526	65.9385	0.000197822		1.46286
87.8719	65.9311	65.9097	0.000459963		1.46453
87.9719	65.9098	65.8751	0.00120302		1.4662
88.0719	65.8884	65.8335	0.00301494		1.46786
88.1719	65.8672	65.7854	0.00668613		1.46953
88.2719	65.846	65.7322	0.0129382		1.4712
88.3719	65.8248	65.6756	0.0222615		1.47286
88.4719	65.8038	65.6168	0.0349422		1.47453
88.5719	65.7827	65.5572	0.050865		1.4762
88.6719	65.7618	65.4991	0.0689806		1.47786
88.7719	65.7409	65.4441	0.0880804		1.47953
88.8719	65.72	65.395	0.105654		1.4812
88.9719	65.6992	65.3572	0.116982		1.48286
89.0719	65.6785	65.3359	0.117322		1.48453
89.1719	65.6578	65.3295	0.107784		1.4862
89.2719	65.6372	65.3317	0.0933081		1.48786
89.3719	65.6166	65.3383	0.0774404		1.48953
89.4719	65.5961	65.3472	0.0619308		1.4912
89.5719	65.5756	65.3572	0.0477203		1.49286
89.6719	65.5552	65.3672	0.0353632		1.49453
89.7719	65.5349	65.3772	0.0248719		1.4962
89.8719	65.5146	65.3872	0.0162361		1.49786
89.9719	65.4944	65.3972	0.00944565		1.49953
90.0719	65.4742	65.4072	0.00449058		1.5012
90.1719	65.4541	65.4172	0.00136086		1.50286
90.2719	65.434	65.4272	4.6546e-05		1.50453
90.3719	65.414	65.4372	0.000537791		1.5062
90.4719	65.394	65.4472	0.0028248		1.50786
90.5719	65.3741	65.4568	0.00684028		1.50953
90.6719	65.3543	65.4649	0.0122426		1.5112
90.7719	65.3345	65.4707	0.0185615		1.51286
90.8719	65.3147	65.4734	0.0251582		1.51453
90.9719	65.2951	65.4719	0.0312845		1.5162
91.0719	65.2754	65.4659	0.0362887		1.51786
91.1719	65.2558	65.4555	0.0398549		1.51953
91.2719	65.2363	65.4413	0.0420403		1.5212
91.3719	65.2168	65.4244	0.0431051		1.52286
91.4719	65.1974	65.4056	0.0433382		1.52453
91.5719	65.178	65.3853	0.0429736		1.5262
91.6719	65.1587	65.3637	0.0420374		1.52786
91.7719	65.1394	65.3404	0.0403985		1.52953
91.8719	65.1202	65.315	0.037939		1.5312
91.9719	65.101	65.2871	0.0346072		1.53286
92.0719	65.0819	65.2565	0.0304702		1.53453
92.1719	65.0629	65.2233	0.0257332		1.5362
92.2719	65.0439	65.1877	0.0207021		1.53786
92.3719	65.0249	65.1502	0.015713		1.53953
92.4719	65.006	65.1112	0.0110734		1.5412
92.5719	64.9871	65.0716	0.00713584		1.54286
92.6719	64.9683	65.0336	0.00426301		1.54453
92.7719	64.9495	64.9986	0.00240765		1.5462
92.8719	64.9308	64.9691	0.00146562		1.54786
92.9719	64.9122	64.9491	0.00136506		1.54953
93.0719	64.8936	64.942	0.00234997		1.5512
93.1719	64.875	64.9467	0.00514753		1.55286
93.2719	64.8565	64.959	0.0105199		1.55453
93.3719	64.838	64.9756	0.0189208		1.5562
93.4719	64.8196	64.9944	0.030564		1.55786
93.5719	64.8012	65.014	0.045281		1.55953
93.6719	64.7829	65.032	0.06203		1.5612
93.7719	64.7646	65.047	0.0797324		1.56286
93.8719	64.7464	65.0572	0.0965681		1.56453
93.9719	64.7282	65.0597	0.109866		1.5662
94.0719	64.7101	65.0525	0.117246		1.56786
94.1719	64.692	65.0363	0.118525		1.56953
94.2719	64.674	65.0137	0.115402		1.5712
94.3719	64.656	64.9872	0.109691		1.57286
94.4719	64.6381	64.9584	0.102605		1.57453
94.5719	64.6202	64.9282	0.0949039		1.5762
94.6719	64.6023	64.8973	0.0869774		1.57786
94.7719	64.5845	64.8653	0.078842		1.57953
94.8719	64.5668	64.8323	0.0705259		1.5812
94.9719	64.5491	64.7983	0.0620897		1.58286
95.0719	64.5314	64.763	0.0536312		1.58453
95.1719	64.5138	64.7266	0.0452822		1.5862
95.2719	64.4962	64.6891	0.0371991		1.58786
95.3719	64.4787	64.6506	0.0295493		1.58953
95.4719	64.4612	64.6112	0.0224981		1.5912
95.5719	64.4438	64.5716	0.0163336		1.59286
95.6719	64.4264	64.5335	0.0114705		1.59453
95.7719	64.4091	64.4977	0.0078581		1.5962
95.8719	64.3918	64.4651	0.00537493		1.59786
95.9719	64.3745	64.4365	0.00384354		1.59953
96.0719	64.3573	64.4125	0.00304927		1.6012
96.1719	64.3401	64.393	0.00279076		1.60286
96.2719	64.323	64.3771	0.00292454		1.60453
96.3719	64.3059	64.364	0.00337022		1.6062
96.4719	64.2889	64.3529	0.00408985		1.60786
96.5719	64.2719	64.3426	0.00499754		1.60953
96.6719	64.255	64.3316	0.00587496		1.6112
96.7719	64.2381	64.3197	0.00666198		1.61286
96.8719	64.2212	64.3067	0.00731139		1.61453
96.9719	64.2044	64.2926	0.00778412		1.6162
97.0719	64.1876	64.2774	0.00805453		1.61786
97.1719	64.1709	64.261	0.00811359		1.61953
97.2719	64.1542	64.2435	0.00796903		1.6212
97.3719	64.1376	64.225	0.00764236		1.62286
97.4719	64.121	64.2056	0.00716409		1.62453
97.5719	64.1044	64.186	0.00665709		1.6262
97.6719	64.0879	64.168	0.00642409		1.62786
97.7719	64.0714	64.1527	0.00661745		1.62953
97.8719	64.055	64.1416	0.00750001		1.6312
97.9719	64.0386	64.1362	0.00952818		1.63286
98.0719	64.0222	64.1377	0.013342		1.63453
98.1719	64.0059	64.1458	0.019583		1.6362
98.2719	63.9896	64.159	0.0286923		1.63786
98.3719	63.9734	64.1756	0.0408915		1.63953
98.4719	63.9572	64.1944	0.0562706		1.6412
98.5719	63.9411	64.2141	0.0745355		1.64286
98.6719	63.925	64.2322	0.0944285		1.64453
98.7719	63.9089	64.2474	0.114615		1.6462
98.8719	63.8929	64.2564	0.132146		1.64786
98.9719	63.8769	64.2522	0.140886		1.64953
99.0719	63.8609	64.2275	0.134375		1.6512
99.1719	63.845	64.1848	0.115473		1.65286
99.2719	63.8291	64.1326	0.0920587		1.65453
99.3719	63.8133	64.0758	0.0689022		1.6562
99.4719	63.7975	64.0168	0.0480966		1.65786
99.5719	63.7818	63.9572	0.0307842		1.65953
99.6719	63.7661	63.8993	0.0177477		1.6612
99.7719	63.7504	63.8442	0.00880844		1.66286
99.8719	63.7348	63.7941	0.00351952		1.66453
99.9719	63.7192	63.7516	0.00104913		1.6662
100.072	63.7036	63.7187	0.000228665		1.66786
100.172	63.6881	63.695	4.70342e-05		1.66953
100.272	63.6726	63.6776	2.43743e-05		1.6712
100.372	63.6572	63.664	4.72804e-05		1.67286
100.472	63.6418	63.6529	0.000123098		1.67453
100.572	63.6264	63.643	0.000275815		1.6762
100.672	63.6111	63.634	0.000525615		1.67786
100.772	63.5958	63.6259	0.0009088		1.67953
100.872	63.5805	63.6189	0.00147247		1.6812
100.972	63.5653	63.613	0.00227371		1.68286
101.072	63.5501	63.6083	0.00337745		1.68453
101.172	63.535	63.6047	0.00485242		1.6862
101.272	63.5199	63.6022	0.00676634		1.68786
101.372	63.5048	63.6006	0.00918145		1.68953
101.472	63.4898	63.6	0.0121515		1.6912
101.572	63.4748	63.5998	0.0156252		1.69286
101.672	63.4598	63.5988	0.019312		1.69453
101.772	63.4449	63.5969	0.0230915		1.6962
101.872	63.43	63.5939	0.0268535		1.69786
101.972	63.4152	63.5898	0.0304936		1.69953
102.072	63.4004	63.5846	0.0339235		1.7012
102.172	63.3856	63.5782	0.0370787		1.70286
102.272	63.3709	63.5707	0.0399223		1.70453
102.372	63.3562	63.5622	0.042443		1.7062
102.472	63.3415	63.5528	0.0446496		1.70786
102.572	63.3268	63.5431	0.0467732		1.70953
102.672	63.3122	63.5347	0.04949		1.7112
102.772	63.2977	63.528	0.0530543		1.71286
102.872	63.2831	63.5234	0.0577431		1.71453
102.972	63.2687	63.5214	0.0638621		1.7162
103.072	63.2542	63.522	0.0716947		1.71786
103.172	63.2398	63.5252	0.0814478		1.71953
103.272	63.2254	63.5307	0.093226		1.7212
103.372	63.211	63.5382	0.107047		1.72286
103.472	63.1967	63.5472	0.122876		1.72453
103.572	63.1824	63.5568	0.140208		1.7262
103.672	63.1681	63.5648	0.157366		1.72786
103.772	63.1539	63.5698	0.172973		1.72953
103.872	63.1397	63.5693	0.184542		1.7312
103.972	63.1256	63.5593	0.188128		1.73286
104.072	63.1115	63.5364	0.180574		1.73453
104.172	63.0974	63.5017	0.163475		1.7362
104.272	63.0833	63.4594	0.141428		1.73786
104.372	63.0693	63.4129	0.118039		1.73953
104.472	63.0553	63.364	0.0952955		1.7412
104.572	63.0414	63.3144	0.0745405		1.74286
104.672	63.0274	63.2663	0.0570572		1.74453
104.772	63.0136	63.2213	0.0431411		1.7462
104.872	62.9997	63.1821	0.0332872		1.74786
104.972	62.9859	63.1544	0.0283906		1.74953
105.072	62.9721	63.1431	0.0292593		1.7512
105.172	62.9583	63.1467	0.0354759		1.75286
105.272	62.9446	63.1589	0.0459221		1.75453
105.372	62.9309	63.1755	0.0598317		1.7562
105.472	62.9172	63.1944	0.0768284		1.75786
105.572	62.9036	63.214	0.0963655		1.75953
105.672	62.89	63.232	0.116979		1.7612
105.772	62.8764	63.247	0.137326		1.76286
105.872	62.8629	63.2565	0.154927		1.76453
105.972	62.8494	63.2565	0.16574		1.7662
106.072	62.8359	63.2436	0.166193		1.76786
106.172	62.8225	63.2189	0.157136		1.76953
106.272	62.8091	63.1866	0.142514		1.7712
106.372	62.7957	63.1501	0.125578		1.77286
106.472	62.7823	63.1112	0.108151		1.77453
106.572	62.769	63.0715	0.0914623		1.7762
106.672	62.7557	63.0324	0.0765664		1.77786
106.772	62.7425	62.9944	0.0634504		1.77953
106.872	62.7293	62.9573	0.0520271		1.7812
106.972	62.7161	62.9214	0.0421836		1.78286
107.072	62.7029	62.8867	0.0337851		1.78453
107.172	62.6898	62.8531	0.0266819		1.7862
107.272	62.6766	62.8206	0.0207206		1.78786
107.372	62.6636	62.7891	0.0157547		1.78953
107.472	62.6505	62.7585	0.0116527		1.7912
107.572	62.6375	62.7288	0.0083334		1.79286
107.672	62.6245	62.7008	0.00582624		1.79453
107.772	62.6116	62.6758	0.0041278		1.7962
107.872	62.5986	62.6556	0.00325071		1.79786
107.972	62.5857	62.6431	0.00329292		1.79953
108.072	62.5729	62.6403	0.00454665		1.8012
108.172	62.56	62.6465	0.0074802		1.80286
108.272	62.5472	62.6591	0.0125214		1.80453
108.372	62.5344	62.6756	0.0199316		1.8062
108.472	62.5217	62.6944	0.029842		1.80786
108.572	62.509	62.714	0.0420539		1.80953
108.672	62.4963	62.732	0.05556		1.8112
108.772	62.4836	62.747	0.0693896		1.81286
108.872	62.4709	62.7572	0.0819217		1.81453
108.972	62.4583	62.7597	0.0908182		1.8162
109.072	62.4458	62.7525	0.0941066		1.81786
109.172	62.4332	62.7363	0.0918719		1.81953
109.272	62.4207	62.7137	0.0858671		1.8212
109.372	62.4082	62.6872	0.0778587		1.82286
109.472	62.3957	62.6584	0.0690044		1.82453
109.572	62.3833	62.6288	0.0602863		1.8262
109.672	62.3708	62.6008	0.0529013		1.82786
109.772	62.3585	62.5758	0.0472414		1.82953
109.872	62.3461	62.5556	0.0439111		1.8312
109.972	62.3338	62.5431	0.0438284		1.83286
110.072	62.3215	62.5403	0.0478878		1.83453
110.172	62.3092	62.5465	0.0563253		1.8362
110.272	62.2969	62.5591	0.0687383		1.83786
110.372	62.2847	62.5756	0.0846236		1.83953
110.472	62.2725	62.5944	0.103628		1.8412
110.572	62.2603	62.614	0.125086		1.84286
110.672	62.2482	62.632	0.147285		1.84453
110.772	62.2361	62.6473	0.169065		1.8462
110.872	62.224	62.6584	0.188743		1.84786
110.972	62.2119	62.6638	0.204208		1.84953
111.072	62.1999	62.6623	0.213804		1.8512
111.172	62.1879	62.6542	0.217417		1.85286
111.272	62.1759	62.641	0.216306		1.85453
111.372	62.1639	62.6244	0.212011		1.8562
111.472	62.152	62.6056	0.205726		1.85786
111.572	62.1401	62.5854	0.198319		1.85953
111.672	62.1282	62.5644	0.190287		1.8612
111.772	62.1164	62.5425	0.181599		1.86286
111.872	62.1045	62.5195	0.172224		1.86453
111.972	62.0927	62.4954	0.162172		1.8662
112.072	62.081	62.4702	0.1515		1.86786
112.172	62.0692	62.4438	0.140309		1.86953
112.272	62.0575	62.4163	0.128745		1.8712
112.372	62.0458	62.3878	0.116976		1.87286
112.472	62.0341	62.3584	0.105177		1.87453
112.572	62.0224	62.3288	0.0938499		1.8762
112.672	62.0108	62.3008	0.0841086		1.87786
112.772	61.9992	62.2756	0.076361		1.87953
112.872	61.9876	62.2544	0.0711446		1.8812
112.972	61.9761	62.239	0.0691141		1.88286
113.072	61.9646	62.2305	0.0707368		1.88453
113.172	61.9531	62.2287	0.075947		1.8862
113.272	61.9416	62.2318	0.0842389		1.88786
113.372	61.9301	62.2384	0.0950429		1.88953
113.472	61.9187	62.2472	0.10793		1.8912
113.572	61.9073	62.2568	0.122173		1.89286
113.672	61.8959	62.2649	0.136162		1.89453
113.772	61.8846	62.2707	0.149115		1.8962
113.872	61.8732	62.2734	0.160092		1.89786
113.972	61.8619	62.2719	0.168094		1.89953
114.072	61.8507	62.2659	0.172442		1.9012
114.172	61.8394	62.2555	0.173121		1.90286
114.272	61.8282	62.2413	0.17072		1.90453
114.372	61.8169	62.2244	0.166054		1.9062
114.472	61.8058	62.2056	0.159856		1.90786
114.572	61.7946	62.1859	0.153144		1.90953
114.672	61.7835	62.1675	0.14751		1.9112
114.772	61.7723	62.1508	0.143258		1.91286
114.872	61.7612	62.1363	0.140641		1.91453
114.972	61.7502	62.1242	0.139882		1.9162
115.072	61.7391	62.1148	0.141109		1.91786
115.172	61.7281	62.108	0.144305		1.91953
115.272	61.7171	62.1035	0.149324		1.9212
115.372	61.7061	62.101	0.155943		1.92286
115.472	61.6952	62.1	0.163933		1.92453
115.572	61.6842	62.0998	0.172705		1.9262
115.672	61.6733	62.0988	0.181048		1.92786
115.772	61.6624	62.0969	0.188751		1.92953
115.872	61.6516	62.0939	0.19567		1.9312
115.972	61.6407	62.0898	0.201685		1.93286
116.072	61.6299	62.0846	0.206716		1.93453
116.172	61.6191	62.0782	0.210732		1.9362
116.272	61.6083	62.0707	0.213755		1.93786
116.372	61.5976	62.0622	0.215849		1.93953
116.472	61.5868	62.0528	0.217103		1.9412
116.572	61.5761	62.0426	0.217608		1.94286
116.672	61.5654	62.0316	0.217324		1.94453
116.772	61.5548	62.0197	0.216147		1.9462
116.872	61.5441	62.0067	0.213985		1.94786
116.972	61.5335	61.9926	0.210783		1.94953
117.072	61.5229	61.9774	0.206531		1.9512
117.172	61.5123	61.961	0.201271		1.95286
117.272	61.5018	61.9435	0.195094		1.95453
117.372	61.4912	61.925	0.188126		1.9562
117.472	61.4807	61.9056	0.18051		1.95786
117.572	61.4702	61.8858	0.17271		1.95953
117.672	61.4598	61.8668	0.165686		1.9612
117.772	61.4493	61.8487	0.159541		1.96286
117.872	61.4389	61.8317	0.154313		1.96453
117.972	61.4285	61.8158	0.150024		1.9662
118.072	61.4181	61.8011	0.146666		1.96786
118.172	61.4077	61.7875	0.144201		1.96953
118.272	61.3974	61.775	0.142564		1.9712
118.372	61.3871	61.7635	0.141673		1.97286
118.472	61.3768	61.7528	0.141436		1.97453
118.572	61.3665	61.7432	0.141888		1.9762
118.672	61.3562	61.7351	0.143528		1.97786
118.772	61.346	61.7293	0.146914		1.97953
118.872	61.3358	61.7266	0.152791		1.9812
118.972	61.3256	61.7281	0.162017		1.98286
119.072	61.3154	61.7341	0.175316		1.98453
119.172	61.3052	61.7445	0.192992		1.9862
119.272	61.2951	61.7587	0.214905		1.98786
119.372	61.285	61.7756	0.240683		1.98953
119.472	61.2749	61.7944	0.269941		1.9912
119.572	61.2648	61.814	0.301657		1.99286
119.672	61.2547	61.832	0.333202		1.99453
119.772	61.2447	61.847	0.362782		1.9962
119.872	61.2347	61.8572	0.387498		1.99786
119.972	61.2247	61.8597	0.403253		1.99953
120.072	61.2147	61.8525	0.406821		2.0012
120.172	61.2047	61.8363	0.398875		2.00286
120.272	61.1948	61.8137	0.383044		2.00453
120.372	61.1849	61.7872	0.362799		2.0062
120.472	61.175	61.7584	0.340371		2.00786
120.572	61.1651	61.7287	0.317696		2.00953
120.672	61.1552	61.7003	0.297133		2.0112
120.772	61.1454	61.6736	0.279046		2.01286
120.872	61.1356	61.6491	0.263686		2.01453
120.972	61.1258	61.627	0.251224		2.0162
121.072	61.116	61.6076	0.241667		2.01786
121.172	61.1062	61.5908	0.234805		2.01953
121.272	61.0965	61.5763	0.230266		2.0212
121.372	61.0867	61.5638	0.227606		2.02286
121.472	61.077	61.5529	0.226408		2.02453
121.572	61.0673	61.5428	0.22607		2.0262
121.672	61.0577	61.5328	0.225757		2.02786
121.772	61.048	61.5228	0.225427		2.02953
121.872	61.0384	61.5128	0.225079		2.0312
121.972	61.0288	61.5028	0.224713		2.03286
122.072	61.0192	61.4928	0.22433		2.03453
122.172	61.0096	61.4828	0.22393		2.0362
122.272	61	61.4728	0.223513		2.03786
122.372	60.9905	61.4628	0.223079		2.03953
122.472	60.981	61.4528	0.222628		2.0412
122.572	60.9715	61.4431	0.222445		2.04286
122.672	60.962	61.4347	0.223463		2.04453
122.772	60.9525	61.428	0.226094		2.0462
122.872	60.9431	61.4234	0.23076		2.04786
122.972	60.9336	61.4214	0.237873		2.04953
123.072	60.9242	61.422	0.24773		2.0512
123.172	60.9148	61.4252	0.260432		2.05286
123.272	60.9055	61.4307	0.275888		2.05453
123.372	60.8961	61.4382	0.293876		2.0562
123.472	60.8868	61.4472	0.314137		2.05786
123.572	60.8774	61.4568	0.335718		2.05953
123.672	60.8681	61.4649	0.35618		2.0612
123.772	60.8588	61.4707	0.374415		2.06286
123.872	60.8496	61.4734	0.389122		2.06453
123.972	60.8403	61.4719	0.398945		2.0662
124.072	60.8311	61.4659	0.403025		2.06786
124.172	60.8219	61.4555	0.401472		2.06953
124.272	60.8127	61.4413	0.39525		2.0712
124.372	60.8035	61.4244	0.385611		2.07286
124.472	60.7943	61.4056	0.37366		2.07453
124.572	60.7851	61.3858	0.36081		2.0762
124.672	60.776	61.3668	0.349043		2.07786
124.772	60.7669	61.3487	0.338542		2.07953
124.872	60.7578	61.3317	0.329379		2.0812
124.972	60.7487	61.3158	0.321594		2.08286
125.072	60.7397	61.3011	0.315183		2.08453
125.172	60.7306	61.2875	0.310094		2.0862
125.272	60.7216	61.275	0.306236		2.08786
125.372	60.7126	61.2635	0.303485		2.08953
125.472	60.7036	61.2528	0.301703		2.0912
125.572	60.6946	61.2425	0.300221		2.09286
125.672	60.6856	61.2309	0.297348		2.09453
125.772	60.6767	61.2176	0.292613		2.0962
125.872	60.6677	61.2022	0.285621		2.09786
125.972	60.6588	61.1843	0.27608		2.09953
126.072	60.6499	61.1637	0.263931		2.1012
126.172	60.6411	61.1405	0.249418		2.10286
126.272	60.6322	61.1149	0.233034		2.10453
126.372	60.6233	61.0874	0.215381		2.1062
126.472	60.6145	61.0584	0.197038		2.10786
126.572	60.6057	61.0288	0.179021		2.10953
126.672	60.5969	61.0008	0.163175		2.1112
126.772	60.5881	60.9756	0.150119		2.11286
126.872	60.5793	60.9544	0.140654		2.11453
126.972	60.5706	60.939	0.135723		2.1162
127.072	60.5619	60.9305	0.135928		2.11786
127.172	60.5531	60.9287	0.141018		2.11953
127.272	60.5444	60.9318	0.150083		2.1212
127.372	60.5357	60.9384	0.162161		2.12286
127.472	60.5271	60.9472	0.176545		2.12453
127.572	60.5184	60.9569	0.192262		2.1262
127.672	60.5098	60.9653	0.207503		2.12786
127.772	60.5011	60.972	0.221694		2.12953
127.872	60.4925	60.9766	0.234277		2.1312
127.972	60.4839	60.9786	0.244728		2.13286
128.072	60.4754	60.978	0.252697		2.13453
128.172	60.4668	60.9748	0.258113		2.1362
128.272	60.4582	60.9693	0.261171		2.13786
128.372	60.4497	60.9618	0.262234		2.13953
128.472	60.4412	60.9528	0.261705		2.1412
128.572	60.4327	60.9428	0.26022		2.14286
128.672	60.4242	60.9328	0.258678		2.14453
128.772	60.4157	60.9228	0.257126		2.1462
128.872	60.4073	60.9128	0.255563		2.14786
128.972	60.3988	60.9028	0.253989		2.14953
129.072	60.3904	60.8928	0.252406		2.1512
129.172	60.382	60.8828	0.250812		2.15286
129.272	60.3736	60.8728	0.249208		2.15453
129.372	60.3652	60.8628	0.247595		2.1562
129.472	60.3569	60.8528	0.245972		2.15786
129.572	60.3485	60.843	0.244535		2.15953
129.672	60.3402	60.834	0.24387		2.1612
129.772	60.3318	60.8259	0.244119		2.16286
129.872	60.3235	60.8189	0.245387		2.16453
129.972	60.3152	60.813	0.247759		2.1662
130.072	60.307	60.8083	0.251288		2.16786
130.172	60.2987	60.8047	0.255987		2.16953
130.272	60.2905	60.8022	0.261832		2.1712
130.372	60.2822	60.8006	0.268764		2.17286
130.472	60.274	60.8	0.276705		2.17453
130.572	60.2658	60.7997	0.285052		2.1762
130.672	60.2576	60.7981	0.292142		2.17786
130.772	60.2494	60.7948	0.297431		2.17953
130.872	60.2413	60.7894	0.300416		2.1812
130.972	60.2331	60.7815	0.300671		2.18286
131.072	60.225	60.7709	0.297985		2.18453
131.172	60.2169	60.7577	0.292459		2.1862
131.272	60.2088	60.7421	0.284466		2.18786
131.372	60.2007	60.7246	0.274525		2.18953
131.472	60.1926	60.7056	0.263165		2.1912
131.572	60.1845	60.686	0.251453		2.19286
131.672	60.1765	60.6679	0.241485		2.19453
131.772	60.1684	60.6521	0.233917		2.1962
131.872	60.1604	60.6395	0.229481		2.19786
131.972	60.1524	60.6309	0.228942		2.19953
132.072	60.1444	60.6269	0.232795		2.2012
132.172	60.1364	60.6273	0.240994		2.20286
132.272	60.1285	60.6315	0.253018		2.20453
132.372	60.1205	60.6384	0.268179		2.2062
132.472	60.1126	60.6472	0.285867		2.20786
132.572	60.1046	60.6569	0.304968		2.20953
132.672	60.0967	60.6653	0.323259		2.2112
132.772	60.0888	60.672	0.340066		2.21286
132.872	60.0809	60.6766	0.354744		2.21453
132.972	60.0731	60.6786	0.366703		2.2162
133.072	60.0652	60.678	0.375561		2.21786
133.172	60.0574	60.6748	0.381268		2.21953
133.272	60.0495	60.6693	0.384095		2.2212
133.372	60.0417	60.6618	0.384498		2.22286
133.472	60.0339	60.6528	0.382976		2.22453
133.572	60.0261	60.6426	0.380059		2.2262
133.672	60.0183	60.6316	0.376109		2.22786
133.772	60.0106	60.6197	0.371018		2.22953
133.872	60.0028	60.6067	0.364685		2.2312
133.972	59.9951	60.5926	0.357049		2.23286
134.072	59.9874	60.5774	0.348109		2.23453
134.172	59.9797	60.561	0.337932		2.2362
134.272	59.972	60.5435	0.326641		2.23786
134.372	59.9643	60.525	0.314404		2.23953
134.472	59.9566	60.5056	0.301411		2.2412
134.572	59.9489	60.4858	0.288259		2.24286
134.672	59.9413	60.4668	0.27619		2.24453
134.772	59.9336	60.4487	0.265331		2.2462
134.872	59.926	60.4317	0.255733		2.24786
134.972	59.9184	60.4158	0.247413		2.24953
135.072	59.9108	60.4011	0.240353		2.2512
135.172	59.9032	60.3875	0.234494		2.25286
135.272	59.8957	60.375	0.229741		2.25453
135.372	59.8881	60.3635	0.225974		2.2562
135.472	59.8805	60.3528	0.223066		2.25786
135.572	59.873	60.3431	0.220999		2.25953
135.672	59.8655	60.3347	0.220168		2.2612
135.772	59.858	60.328	0.220935		2.26286
135.872	59.8505	60.3234	0.223698		2.26453
135.972	59.843	60.3214	0.228836		2.2662
136.072	59.8355	60.322	0.236614		2.26786
136.172	59.8281	60.3252	0.247105		2.26953
136.272	59.8206	60.3307	0.260193		2.2712
136.372	59.8132	60.3382	0.275647		2.27286
136.472	59.8058	60.3472	0.2932		2.27453
136.572	59.7983	60.3569	0.311972		2.2762
136.672	59.7909	60.3653	0.32988		2.27786
136.772	59.7836	60.372	0.346254		2.27953
136.872	59.7762	60.3766	0.360452		2.2812
136.972	59.7688	60.3786	0.371885		2.28286
137.072	59.7615	60.378	0.380179		2.28453
137.172	59.7541	60.3748	0.385293		2.2862
137.272	59.7468	60.3693	0.387507		2.28786
137.372	59.7395	60.3618	0.387285		2.28953
137.472	59.7322	60.3528	0.385135		2.2912
137.572	59.7249	60.3426	0.381592		2.29286
137.672	59.7176	60.3316	0.377021		2.29453
137.772	59.7103	60.3197	0.371318		2.2962
137.872	59.7031	60.3067	0.364383		2.29786
137.972	59.6958	60.2926	0.356159		2.29953
138.072	59.6886	60.2774	0.34665		2.3012
138.172	59.6814	60.261	0.335923		2.30286
138.272	59.6742	60.2435	0.324107		2.30453
138.372	59.667	60.225	0.311373		2.3062
138.472	59.6598	60.2056	0.29791		2.30786
138.572	59.6526	60.186	0.284476		2.30953
138.672	59.6454	60.1679	0.27294		2.3112
138.772	59.6383	60.1521	0.263982		2.31286
138.872	59.6312	60.1395	0.258371		2.31453
138.972	59.624	60.1309	0.256908		2.3162
139.072	59.6169	60.1269	0.260094		2.31786
139.172	59.6098	60.1273	0.267851		2.31953
139.272	59.6027	60.1315	0.279597		2.3212
139.372	59.5956	60.1384	0.294579		2.32286
139.472	59.5885	60.1472	0.312134		2.32453
139.572	59.5815	60.1569	0.331084		2.3262
139.672	59.5744	60.1653	0.349112		2.32786
139.772	59.5674	60.172	0.365529		2.32953
139.872	59.5604	60.1766	0.379684		2.3312
139.972	59.5534	60.1786	0.390983		2.33286
140.072	59.5463	60.178	0.399049		2.33453
140.172	59.5394	60.1748	0.403851		2.3362
140.272	59.5324	60.1693	0.405679		2.33786
140.372	59.5254	60.1618	0.405016		2.33953
140.472	59.5184	60.1528	0.402383		2.3412
140.572	59.5115	60.1428	0.398581		2.34286
140.672	59.5045	60.1328	0.394726		2.34453
140.772	59.4976	60.1228	0.390877		2.3462
140.872	59.4907	60.1128	0.387033		2.34786
140.972	59.4838	60.1028	0.383195		2.34953
141.072	59.4769	60.0928	0.379363		2.3512
141.172	59.47	60.0828	0.375537		2.35286
141.272	59.4631	60.0728	0.371717		2.35453
141.372	59.4563	60.0628	0.367904		2.3562
141.472	59.4494	60.0528	0.364097		2.35786
141.572	59.4426	60.0428	0.360297		2.35953
141.672	59.4357	60.0328	0.356505		2.3612
141.772	59.4289	60.0228	0.35272		2.36286
141.872	59.4221	60.0128	0.348943		2.36453
141.972	59.4153	60.0028	0.345174		2.3662
142.072	59.4085	59.9928	0.341413		2.36786
142.172	59.4017	59.9828	0.337661		2.36953
142.272	59.395	59.9728	0.333917		2.3712
142.372	59.3882	59.9628	0.330182		2.37286
142.472	59.3815	59.9528	0.326456		2.37453
142.572	59.3747	59.9426	0.322515		2.3762
142.672	59.368	59.9316	0.317692		2.37786
142.772	59.3613	59.9197	0.311843		2.37953
142.872	59.3546	59.9067	0.304884		2.3812
142.972	59.3479	59.8926	0.296769		2.38286
143.072	59.3412	59.8774	0.287508		2.38453
143.172	59.3345	59.861	0.277173		2.3862
143.272	59.3278	59.8435	0.265889		2.38786
143.372	59.3212	59.825	0.253821		2.38953
143.472	59.3145	59.8056	0.241149		2.3912
143.572	59.3079	59.7856	0.228231		2.39286
143.672	59.3013	59.7656	0.215631		2.39453
143.772	59.2946	59.7456	0.20338		2.3962
143.872	59.288	59.7256	0.191479		2.39786
143.972	59.2814	59.7056	0.179928		2.39953
144.072	59.2749	59.6856	0.168728		2.4012
144.172	59.2683	59.6656	0.15788		2.40286
144.272	59.2617	59.6456	0.147385		2.40453
144.372	59.2552	59.6256	0.137244		2.4062
144.472	59.2486	59.6056	0.127457		2.40786
144.572	59.2421	59.586	0.118271		2.40953
144.672	59.2356	59.568	0.110538		2.4112
144.772	59.229	59.5527	0.104788		2.41286
144.872	59.2225	59.5416	0.101783		2.41453
144.972	59.216	59.5362	0.102495		2.4162
145.072	59.2095	59.5377	0.107701		2.41786
145.172	59.2031	59.5458	0.117495		2.41953
145.272	59.1966	59.559	0.131349		2.4212
145.372	59.1901	59.5756	0.148594		2.42286
145.472	59.1837	59.5944	0.168704		2.42453
145.572	59.1772	59.614	0.190769		2.4262
145.672	59.1708	59.632	0.212656		2.42786
145.772	59.1644	59.647	0.232909		2.42953
145.872	59.158	59.6572	0.249179		2.4312
145.972	59.1516	59.6597	0.258175		2.43286
146.072	59.1452	59.6525	0.25738		2.43453
146.172	59.1388	59.6363	0.247496		2.4362
146.272	59.1324	59.6137	0.231615		2.43786
146.372	59.1261	59.5872	0.21264		2.43953
146.472	59.1197	59.5584	0.19243		2.4412
146.572	59.1134	59.5288	0.172576		2.44286
146.672	59.107	59.5008	0.155077		2.44453
146.772	59.1007	59.4756	0.140508		2.4462
146.872	59.0944	59.4544	0.129585		2.44786
146.972	59.0881	59.439	0.123132		2.44953
147.072	59.0818	59.4305	0.121621		2.4512
147.172	59.0755	59.4287	0.124716		2.45286
147.272	59.0692	59.4318	0.131485		2.45453
147.372	59.063	59.4384	0.140984		2.4562
147.472	59.0567	59.4472	0.152528		2.45786
147.572	59.0504	59.457	0.165284		2.45953
147.672	59.0442	59.466	0.177919		2.4612
147.772	59.038	59.4741	0.190191		2.46286
147.872	59.0317	59.4811	0.201925		2.46453
147.972	59.0255	59.487	0.212965		2.4662
148.072	59.0193	59.4917	0.223194		2.46786
148.172	59.0131	59.4953	0.232546		2.46953
148.272	59.0069	59.4978	0.241008		2.4712
148.372	59.0007	59.4994	0.248613		2.47286
148.472	58.9946	59.5	0.255428		2.47453
148.572	58.9884	59.4997	0.261417		2.4762
148.672	58.9823	59.4981	0.266102		2.47786
148.772	58.9761	59.4948	0.269039		2.47953
148.872	58.97	59.4894	0.269769		2.4812
148.972	58.9638	59.4815	0.267914		2.48286
149.072	58.9577	59.4709	0.263306		2.48453
149.172	58.9516	59.4577	0.256074		2.4862
149.272	58.9455	59.4421	0.246603		2.48786
149.372	58.9394	59.4246	0.23541		2.48953
149.472	58.9333	59.4056	0.22301		2.4912
149.572	58.9273	59.386	0.210422		2.49286
149.672	58.9212	59.368	0.199651		2.49453
149.772	58.9151	59.3527	0.191494		2.4962
149.872	58.9091	59.3416	0.187029		2.49786
149.972	58.9031	59.3362	0.187596		2.49953
150.072	58.897	59.3377	0.194214		2.5012
150.172	58.891	59.3458	0.206879		2.50286
150.272	58.885	59.359	0.224706		2.50453
150.372	58.879	59.3756	0.246647		2.5062
150.472	58.873	59.3944	0.271902		2.50786
150.572	58.867	59.414	0.299231		2.50953
150.672	58.861	59.432	0.325997		2.5112
150.772	58.855	59.4473	0.350717		2.51286
150.872	58.8491	59.4584	0.371318		2.51453
150.972	58.8431	59.4638	0.385267		2.5162
151.072	58.8372	59.4623	0.390755		2.51786
151.172	58.8312	59.4542	0.388033		2.51953
151.272	58.8253	59.441	0.379056		2.5212
151.372	58.8194	59.4244	0.366024		2.52286
151.472	58.8135	59.4056	0.350587		2.52453
151.572	58.8076	59.3859	0.334503		2.5262
151.672	58.8017	59.3675	0.320189		2.52786
151.772	58.7958	59.3508	0.308078		2.52953
151.872	58.7899	59.3363	0.29851		2.5312
151.972	58.784	59.3242	0.291761		2.53286
152.072	58.7782	59.3148	0.287942		2.53453
152.172	58.7723	59.308	0.286936		2.5362
152.272	58.7665	59.3035	0.288432		2.53786
152.372	58.7606	59.301	0.292024		2.53953
152.472	58.7548	59.3	0.297306		2.5412
152.572	58.749	59.2997	0.303309		2.54286
152.672	58.7431	59.2981	0.307979		2.54453
152.772	58.7373	59.2948	0.310762		2.5462
152.872	58.7315	59.2894	0.311171		2.54786
152.972	58.7257	59.2815	0.308805		2.54953
153.072	58.72	59.2709	0.303488		2.5512
153.172	58.7142	59.2577	0.295357		2.55286
153.272	58.7084	59.2421	0.284823		2.55453
153.372	58.7027	59.2246	0.272436		2.5562
153.472	58.6969	59.2056	0.258747		2.55786
153.572	58.6912	59.186	0.244846		2.55953
153.672	58.6854	59.168	0.232898		2.5612
153.772	58.6797	59.1527	0.22377		2.56286
153.872	58.674	59.1416	0.218633		2.56453
153.972	58.6683	59.1362	0.218939		2.5662
154.072	58.6626	59.1377	0.225774		2.56786
154.172	58.6569	59.1458	0.239095		2.56953
154.272	58.6512	59.159	0.257901		2.5712
154.372	58.6455	59.1756	0.281027		2.57286
154.472	58.6398	59.1944	0.307583		2.57453
154.572	58.6342	59.214	0.33626		2.5762
154.672	58.6285	59.232	0.36425		2.57786
154.772	58.6228	59.247	0.389585		2.57953
154.872	58.6172	59.2565	0.408713		2.5812
154.972	58.6116	59.2565	0.41595		2.58286
155.072	58.6059	59.2436	0.4066		2.58453
155.172	58.6003	59.2189	0.382624		2.5862
155.272	58.5947	59.1866	0.350314		2.58786
155.372	58.5891	59.1501	0.314673		2.58953
155.472	58.5835	59.1112	0.278466		2.5912
155.572	58.5779	59.0716	0.243736		2.59286
155.672	58.5723	59.0337	0.212814		2.59453
155.772	58.5668	58.9984	0.18629		2.5962
155.872	58.5612	58.9672	0.164835		2.59786
155.972	58.5556	58.9418	0.14913		2.59953
156.072	58.5501	58.9233	0.13933		2.6012
156.172	58.5445	58.9115	0.13464		2.60286
156.272	58.539	58.9046	0.133699		2.60453
156.372	58.5335	58.9012	0.13526		2.6062
156.472	58.5279	58.9001	0.138465		2.60786
156.572	58.5224	58.9	0.142561		2.60953
156.672	58.5169	58.9	0.146751		2.6112
156.772	58.5114	58.9	0.150996		2.61286
156.872	58.5059	58.9	0.155296		2.61453
156.972	58.5004	58.9	0.15965		2.6162
157.072	58.495	58.9	0.164058		2.61786
157.172	58.4895	58.9	0.168521		2.61953
157.272	58.484	58.9	0.173037		2.6212
157.372	58.4786	58.9	0.177608		2.62286
157.472	58.4731	58.9	0.182231		2.62453
157.572	58.4677	58.9	0.186908		2.6262
157.672	58.4622	58.9	0.191637		2.62786
157.772	58.4568	58.9	0.19642		2.62953
157.872	58.4514	58.9	0.201255		2.6312
157.972	58.446	58.9	0.206142		2.63286
158.072	58.4406	58.9	0.211081		2.63453
158.172	58.4352	58.9	0.216072		2.6362
158.272	58.4298	58.9	0.221115		2.63786
158.372	58.4244	58.9	0.22621		2.63953
158.472	58.419	58.9	0.231355		2.6412
158.572	58.4136	58.8997	0.236259		2.64286
158.672	58.4083	58.8981	0.23994		2.64453
158.772	58.4029	58.8948	0.241954		2.6462
158.872	58.3976	58.8894	0.241874		2.64786
158.972	58.3922	58.8815	0.239351		2.64953
159.072	58.3869	58.8709	0.23424		2.6512
159.172	58.3815	58.8577	0.226679		2.65286
159.272	58.3762	58.8421	0.217048		2.65453
159.372	58.3709	58.8246	0.20585		2.6562
159.472	58.3656	58.8056	0.193584		2.65786
159.572	58.3603	58.7858	0.181073		2.65953
159.672	58.355	58.7668	0.16959		2.6612
159.772	58.3497	58.7487	0.159226		2.66286
159.872	58.3444	58.7317	0.149992		2.66453
159.972	58.3392	58.7158	0.141871		2.6662
160.072	58.3339	58.7011	0.134822		2.66786
160.172	58.3286	58.6875	0.12877		2.66953
160.272	58.3234	58.675	0.123618		2.6712
160.372	58.3181	58.6635	0.119258		2.67286
160.472	58.3129	58.6528	0.115574		2.67453
160.572	58.3076	58.6428	0.112337		2.6762
160.672	58.3024	58.6328	0.10916		2.67786
160.772	58.2972	58.6228	0.106026		2.67953
160.872	58.292	58.6128	0.102932		2.6812
160.972	58.2868	58.6028	0.0998801		2.68286
161.072	58.2816	58.5928	0.0968699		2.68453
161.172	58.2764	58.5828	0.0939018		2.6862
161.272	58.2712	58.5728	0.0909758		2.68786
161.372	58.266	58.5628	0.0880923		2.68953
161.472	58.2608	58.5528	0.0852513		2.6912
161.572	58.2557	58.543	0.0825666		2.69286
161.672	58.2505	58.534	0.0803703		2.69453
161.772	58.2454	58.5259	0.078726		2.6962
161.872	58.2402	58.5189	0.0776758		2.69786
161.972	58.2351	58.513	0.0772513		2.69953
162.072	58.2299	58.5083	0.0774682		2.7012
162.172	58.2248	58.5047	0.078323		2.70286
162.272	58.2197	58.5022	0.0797946		2.70453
162.372	58.2146	58.5006	0.0818477		2.7062
162.472	58.2094	58.5	0.0844387		2.70786
162.572	58.2043	58.4998	0.0872963		2.70953
162.672	58.1992	58.4988	0.0897395		2.7112
162.772	58.1942	58.4969	0.0916431		2.71286
162.872	58.1891	58.4939	0.0929253		2.71453
162.972	58.184	58.4898	0.0935251		2.7162
163.072	58.1789	58.4846	0.0934133		2.71786
163.172	58.1739	58.4782	0.0925976		2.71953
163.272	58.1688	58.4707	0.0911212		2.7212
163.372	58.1637	58.4622	0.0890547		2.72286
163.472	58.1587	58.4528	0.0864849		2.72453
163.572	58.1537	58.4428	0.0836092		2.7262
163.672	58.1486	58.4328	0.0807616		2.72786
163.772	58.1436	58.4228	0.07796		2.72953
163.872	58.1386	58.4128	0.0752043		2.7312
163.972	58.1336	58.4028	0.0724949		2.73286
164.072	58.1286	58.3928	0.0698319		2.73453
164.172	58.1236	58.3828	0.0672154		2.7362
164.272	58.1186	58.3728	0.0646458		2.73786
164.372	58.1136	58.3628	0.0621232		2.73953
164.472	58.1086	58.3528	0.0596478		2.7412
164.572	58.1036	58.3431	0.0573642		2.74286
164.672	58.0986	58.3347	0.0557299		2.74453
164.772	58.0937	58.328	0.0549169		2.7462
164.872	58.0887	58.3234	0.0551006		2.74786
164.972	58.0838	58.3214	0.0564558		2.74953
165.072	58.0788	58.322	0.0591169		2.7512
165.172	58.0739	58.3252	0.0631448		2.75286
165.272	58.0689	58.3307	0.0685225		2.75453
165.372	58.064	58.3382	0.0751803		2.7562
165.472	58.0591	58.3472	0.0830287		2.75786
165.572	58.0542	58.357	0.0917009		2.75953
165.672	58.0493	58.366	0.100325		2.7612
165.772	58.0444	58.3741	0.108713		2.76286
165.872	58.0395	58.3811	0.116719		2.76453
165.972	58.0346	58.387	0.124213		2.7662
166.072	58.0297	58.3917	0.131095		2.76786
166.172	58.0248	58.3953	0.137307		2.76953
166.272	58.0199	58.3978	0.142831		2.7712
166.372	58.015	58.3994	0.147689		2.77286
166.472	58.0102	58.4	0.151931		2.77453
166.572	58.0053	58.3998	0.155609		2.7762
166.672	58.0005	58.3988	0.158669		2.77786
166.772	57.9956	58.3969	0.161		2.77953
166.872	57.9908	58.3939	0.162501		2.7812
166.972	57.986	58.3898	0.163097		2.78286
167.072	57.9811	58.3846	0.162752		2.78453
167.172	57.9763	58.3782	0.16148		2.7862
167.272	57.9715	58.3707	0.159334		2.78786
167.372	57.9667	58.3622	0.156406		2.78953
167.472	57.9619	58.3528	0.152806		2.7912
167.572	57.9571	58.3428	0.148789		2.79286
167.672	57.9523	58.3328	0.144799		2.79453
167.772	57.9475	58.3228	0.140859		2.7962
167.872	57.9427	58.3128	0.136969		2.79786
167.972	57.9379	58.3028	0.133129		2.79953
168.072	57.9332	58.2928	0.12934		2.8012
168.172	57.9284	58.2828	0.125602		2.80286
168.272	57.9237	58.2728	0.121914		2.80453
168.372	57.9189	58.2628	0.118277		2.8062
168.472	57.9142	58.2528	0.114692		2.80786
168.572	57.9094	58.243	0.11129		2.80953
168.672	57.9047	58.234	0.108457		2.8112
168.772	57.8999	58.2259	0.106268		2.81286
168.872	57.8952	58.2189	0.104773		2.81453
168.972	57.8905	58.213	0.104007		2.8162
169.072	57.8858	58.2083	0.103986		2.81786
169.172	57.8811	58.2047	0.104703		2.81953
169.272	57.8764	58.2022	0.106129		2.8212
169.372	57.8717	58.2006	0.108219		2.82286
169.472	57.867	58.2	0.110916		2.82453
169.572	57.8623	58.2002	0.114172		2.8262
169.672	57.8576	58.2012	0.118037		2.82786
169.772	57.8529	58.2031	0.122619		2.82953
169.872	57.8483	58.2061	0.128029		2.8312
169.972	57.8436	58.2102	0.134374		2.83286
170.072	57.839	58.2154	0.141739		2.83453
170.172	57.8343	58.2218	0.150186		2.8362
170.272	57.8297	58.2293	0.159743		2.83786
170.372	57.825	58.2378	0.170417		2.83953
170.472	57.8204	58.2472	0.182188		2.8412
170.572	57.8158	58.2568	0.194555		2.84286
170.672	57.8111	58.2648	0.205802		2.84453
170.772	57.8065	58.2698	0.214659		2.8462
170.872	57.8019	58.27	0.219107		2.84786
170.972	57.7973	58.2625	0.216437		2.84953
171.072	57.7927	58.2453	0.204898		2.8512
171.172	57.7881	58.2191	0.185792		2.85286
171.272	57.7835	58.1865	0.162433		2.85453
171.372	57.7789	58.15	0.137729		2.8562
171.472	57.7743	58.1112	0.113492		2.85786
171.572	57.7697	58.0716	0.0911026		2.85953
171.672	57.7652	58.0335	0.0719998		2.8612
171.772	57.7606	57.9984	0.0565693		2.86286
171.872	57.756	57.9693	0.0454932		2.86453
171.972	57.7515	57.9516	0.0400282		2.8662
172.072	57.7469	57.9503	0.0413667		2.86786
172.172	57.7424	57.9639	0.0490495		2.86953
172.272	57.7378	57.9861	0.0616173		2.8712
172.372	57.7333	58.0127	0.0780525		2.87286
172.472	57.7288	58.0416	0.0978561		2.87453
172.572	57.7243	58.0712	0.120367		2.8762
172.672	57.7197	58.0992	0.143959		2.87786
172.772	57.7152	58.1244	0.167456		2.87953
172.872	57.7107	58.1456	0.189141		2.8812
172.972	57.7062	58.161	0.206835		2.88286
173.072	57.7017	58.1695	0.218788		2.88453
173.172	57.6972	58.1713	0.224791		2.8862
173.272	57.6927	58.1682	0.226036		2.88786
173.372	57.6883	58.1616	0.224029		2.88953
173.472	57.6838	58.1528	0.219948		2.8912
173.572	57.6793	58.1426	0.214658		2.89286
173.672	57.6748	58.1316	0.208656		2.89453
173.772	57.6704	58.1197	0.20189		2.8962
173.872	57.6659	58.1067	0.194309		2.89786
173.972	57.6615	58.0926	0.185901		2.89953
174.072	57.657	58.0774	0.176699		2.9012
174.172	57.6526	58.061	0.166787		2.90286
174.272	57.6481	58.0435	0.156292		2.90453
174.372	57.6437	58.025	0.145371		2.9062
174.472	57.6393	58.0056	0.13419		2.90786
174.572	57.6349	57.9859	0.123252		2.90953
174.672	57.6304	57.9675	0.113624		2.9112
174.772	57.626	57.9508	0.105495		2.91286
174.872	57.6216	57.9363	0.0989981		2.91453
174.972	57.6172	57.9242	0.0942231		2.9162
175.072	57.6128	57.9148	0.0911698		2.91786
175.172	57.6084	57.908	0.089725		2.91953
175.272	57.604	57.9035	0.0896856		2.9212
175.372	57.5997	57.901	0.0908126		2.92286
175.472	57.5953	57.9	0.0928802		2.92453
175.572	57.5909	57.8997	0.0953506		2.9262
175.672	57.5865	57.8981	0.0970722		2.92786
175.772	57.5822	57.8948	0.0977314		2.92953
175.872	57.5778	57.8894	0.0970605		2.9312
175.972	57.5735	57.8815	0.094853		2.93286
176.072	57.5691	57.8709	0.091048		2.93453
176.172	57.5648	57.8577	0.085778		2.9362
176.272	57.5604	57.8421	0.079338		2.93786
176.372	57.5561	57.8246	0.0720976		2.93953
176.472	57.5518	57.8056	0.0644168		2.9412
176.572	57.5475	57.786	0.0568943		2.94286
176.672	57.5431	57.768	0.0505797		2.94453
176.772	57.5388	57.753	0.0458705		2.9462
176.872	57.5345	57.7428	0.0433981		2.94786
176.972	57.5302	57.7403	0.0441406		2.94953
177.072	57.5259	57.7475	0.049094		2.9512
177.172	57.5216	57.7637	0.0586053		2.95286
177.272	57.5173	57.7863	0.0723475		2.95453
177.372	57.513	57.8128	0.0898549		2.9562
177.472	57.5088	57.8416	0.110792		2.95786
177.572	57.5045	57.8712	0.1345		2.95953
177.672	57.5002	57.8992	0.159207		2.9612
177.772	57.4959	57.9242	0.183406		2.96286
177.872	57.4917	57.9437	0.20432		2.96453
177.972	57.4874	57.9537	0.217412		2.9662
178.072	57.4832	57.9508	0.218659		2.96786
178.172	57.4789	57.9361	0.208987		2.96953
178.272	57.4747	57.9138	0.192799		2.9712
178.372	57.4704	57.8872	0.173727		2.97286
178.472	57.4662	57.8584	0.153809		2.97453
178.572	57.462	57.8288	0.134553		2.9762
178.672	57.4578	57.8008	0.117713		2.97786
178.772	57.4535	57.7758	0.103861		2.97953
178.872	57.4493	57.7556	0.0938369		2.9812
178.972	57.4451	57.7431	0.0888092		2.98286
179.072	57.4409	57.7403	0.0896344		2.98453
179.172	57.4367	57.7465	0.0959824		2.9862
179.272	57.4325	57.7591	0.106672		2.98786
179.372	57.4283	57.7756	0.120615		2.98953
179.472	57.4241	57.7944	0.137122		2.9912
179.572	57.4199	57.814	0.155294		2.99286
179.672	57.4158	57.832	0.173233		2.99453
179.772	57.4116	57.8473	0.189806		2.9962
179.872	57.4074	57.8584	0.203417		2.99786
179.972	57.4033	57.8638	0.212123		2.99953
180.072	57.3991	57.8623	0.214542		3.0012
180.172	57.3949	57.8542	0.210886		3.00286
180.272	57.3908	57.841	0.202677		3.00453
180.372	57.3866	57.8244	0.191621		3.0062
180.472	57.3825	57.8056	0.178996		3.00786
180.572	57.3784	57.7858	0.166029		3.00953
180.672	57.3742	57.7668	0.154128		3.0112
180.772	57.3701	57.7487	0.143376		3.01286
180.872	57.366	57.7317	0.133772		3.01453
180.972	57.3618	57.7158	0.125291		3.0162
181.072	57.3577	57.7011	0.117879		3.01786
181.172	57.3536	57.6875	0.111455		3.01953
181.272	57.3495	57.675	0.105917		3.0212
181.372	57.3454	57.6635	0.101154		3.02286
181.472	57.3413	57.6528	0.09705		3.02453
181.572	57.3372	57.6431	0.0935713		3.0262
181.672	57.3331	57.6347	0.0909481		3.02786
181.772	57.329	57.628	0.0893816		3.02953
181.872	57.325	57.6234	0.0890908		3.0312
181.972	57.3209	57.6214	0.0902842		3.03286
182.072	57.3168	57.622	0.0931066		3.03453
182.172	57.3127	57.6252	0.0975983		3.0362
182.272	57.3087	57.6307	0.103695		3.03786
182.372	57.3046	57.6382	0.111269		3.03953
182.472	57.3006	57.6472	0.120172		3.0412
182.572	57.2965	57.6568	0.129829		3.04286
182.672	57.2925	57.6649	0.138722		3.04453
182.772	57.2884	57.6707	0.146148		3.0462
182.872	57.2844	57.6734	0.15129		3.04786
182.972	57.2804	57.6719	0.153323		3.04953
183.072	57.2763	57.6659	0.151771		3.0512
183.172	57.2723	57.6555	0.146812		3.05286
183.272	57.2683	57.6413	0.139166		3.05453
183.372	57.2643	57.6244	0.129721		3.0562
183.472	57.2603	57.6056	0.119243		3.05786
183.572	57.2563	57.5858	0.108617		3.05953
183.672	57.2522	57.5668	0.0989513		3.0612
183.772	57.2483	57.5487	0.0902969		3.06286
183.872	57.2443	57.5317	0.0826351		3.06453
183.972	57.2403	57.5158	0.0759275		3.0662
184.072	57.2363	57.5011	0.0701139		3.06786
184.172	57.2323	57.4875	0.0651144		3.06953
184.272	57.2283	57.475	0.0608352		3.0712
184.372	57.2243	57.4635	0.0571768		3.07286
184.472	57.2204	57.4528	0.0540423		3.07453
184.572	57.2164	57.4431	0.0513965		3.0762
184.672	57.2124	57.4347	0.0494003		3.07786
184.772	57.2085	57.428	0.0481916		3.07953
184.872	57.2045	57.4234	0.0479224		3.0812
184.972	57.2006	57.4214	0.0487426		3.08286
185.072	57.1966	57.422	0.050765		3.08453
185.172	57.1927	57.4252	0.0540366		3.0862
185.272	57.1888	57.4307	0.0585358		3.08786
185.372	57.1848	57.4382	0.0641954		3.08953
185.472	57.1809	57.4472	0.0709321		3.0912
185.572	57.177	57.4569	0.0783493		3.09286
185.672	57.1731	57.4653	0.085403		3.09453
185.772	57.1691	57.472	0.0917169		3.0962
185.872	57.1652	57.4766	0.0969251		3.09786
185.972	57.1613	57.4786	0.100692		3.09953
186.072	57.1574	57.478	0.102808		3.1012
186.172	57.1535	57.4748	0.103254		3.10286
186.272	57.1496	57.4693	0.102195		3.10453
186.372	57.1457	57.4618	0.099906		3.1062
186.472	57.1418	57.4528	0.0966796		3.10786
186.572	57.138	57.443	0.0930614		3.10953
186.672	57.1341	57.434	0.0899585		3.1112
186.772	57.1302	57.4259	0.0874604		3.11286
186.872	57.1263	57.4189	0.0856049		3.11453
186.972	57.1225	57.413	0.0844174		3.1162
187.072	57.1186	57.4083	0.083906		3.11786
187.172	57.1147	57.4047	0.0840583		3.11953
187.272	57.1109	57.4022	0.0848434		3.1212
187.372	57.107	57.4006	0.0862163		3.12286
187.472	57.1032	57.4	0.0881247		3.12453
187.572	57.0993	57.3997	0.090223		3.1262
187.672	57.0955	57.3981	0.0915788		3.12786
187.772	57.0916	57.3948	0.0919		3.12953
187.872	57.0878	57.3894	0.0909327		3.1312
187.972	57.084	57.3815	0.0884844		3.13286
188.072	57.0802	57.3709	0.0845064		3.13453
188.172	57.0763	57.3577	0.0791382		3.1362
188.272	57.0725	57.3421	0.0726763		3.13786
188.372	57.0687	57.3246	0.0654875		3.13953
188.472	57.0649	57.3056	0.0579273		3.1412
188.572	57.0611	57.286	0.0505702		3.14286
188.672	57.0573	57.2679	0.0443481		3.14453
188.772	57.0535	57.2521	0.0394382		3.1462
188.872	57.0497	57.2395	0.0360068		3.14786
188.972	57.0459	57.2309	0.0342153		3.14953
189.072	57.0421	57.2269	0.0341418		3.1512
189.172	57.0383	57.2273	0.0357211		3.15286
189.272	57.0346	57.2315	0.0387734		3.15453
189.372	57.0308	57.2384	0.0430905		3.1562
189.472	57.027	57.2472	0.0484964		3.15786
189.572	57.0233	57.2569	0.054585		3.15953
189.672	57.0195	57.2653	0.0604204		3.1612
189.772	57.0157	57.272	0.0656686		3.16286
189.872	57.012	57.2766	0.0700037		3.16453
189.972	57.0082	57.2786	0.0731261		3.1662
190.072	57.0045	57.278	0.074845		3.16786
190.172	57.0007	57.2748	0.0751402		3.16953
190.272	56.997	57.2693	0.0741533		3.1712
190.372	56.9932	57.2618	0.0721216		3.17286
190.472	56.9895	57.2528	0.0693027		3.17453
190.572	56.9858	57.2426	0.0659619		3.1762
190.672	56.9821	57.2316	0.062283		3.17786
190.772	56.9783	57.2197	0.0582537		3.17953
190.872	56.9746	57.2067	0.0538717		3.1812
190.972	56.9709	57.1926	0.0491607		3.18286
191.072	56.9672	57.1774	0.0441753		3.18453
191.172	56.9635	57.161	0.039		3.1862
191.272	56.9598	57.1435	0.0337433		3.18786
191.372	56.9561	57.125	0.0285268		3.18953
191.472	56.9524	57.1056	0.0234738		3.1912
191.572	56.9487	57.086	0.0188461		3.19286
191.672	56.945	57.0679	0.0150995		3.19453
191.772	56.9413	57.0521	0.0122696		3.1962
191.872	56.9376	57.0395	0.0103673		3.19786
191.972	56.934	57.0309	0.00939482		3.19953
192.072	56.9303	57.0269	0.00933469		3.2012
192.172	56.9266	57.0273	0.0101465		3.20286
192.272	56.9229	57.0315	0.0117782		3.20453
192.372	56.9193	57.0384	0.0141821		3.2062
192.472	56.9156	57.0472	0.0173223		3.20786
192.572	56.912	57.057	0.0210315		3.20953
192.672	56.9083	57.066	0.0248643		3.2112
192.772	56.9047	57.0741	0.0286975		3.21286
192.872	56.901	57.0811	0.0324271		3.21453
192.972	56.8974	57.087	0.0359564		3.2162
193.072	56.8937	57.0917	0.0392063		3.21786
193.172	56.8901	57.0953	0.0421227		3.21953
193.272	56.8865	57.0978	0.0446794		3.2212
193.372	56.8828	57.0994	0.0468757		3.22286
193.472	56.8792	57.1	0.04873		3.22453
193.572	56.8756	57.0998	0.0502662		3.2262
193.672	56.872	57.0988	0.0514507		3.22786
193.772	56.8684	57.0969	0.0522173		3.22953
193.872	56.8648	57.0939	0.0525084		3.2312
193.972	56.8612	57.0898	0.0522846		3.23286
194.072	56.8576	57.0846	0.0515321		3.23453
194.172	56.854	57.0782	0.0502673		3.2362
194.272	56.8504	57.0707	0.0485344		3.23786
194.372	56.8468	57.0622	0.0463984		3.23953
194.472	56.8432	57.0528	0.0439357		3.2412
194.572	56.8396	57.043	0.0413801		3.24286
194.672	56.836	57.034	0.0392015		3.24453
194.772	56.8324	57.0259	0.037443		3.2462
194.872	56.8289	57.0189	0.0361192		3.24786
194.972	56.8253	57.013	0.0352378		3.24953
195.072	56.8217	57.0083	0.034797		3.2512
195.172	56.8182	57.0047	0.0347846		3.25286
195.272	56.8146	57.0022	0.0351794		3.25453
195.372	56.811	57.0006	0.0359535		3.2562
195.472	56.8075	57	0.0370761		3.25786
195.572	56.8039	57	0.0384445		3.25953
195.672	56.8004	57	0.0398482		3.2612
195.772	56.7968	57	0.0412756		3.26286
195.872	56.7933	57	0.0427268		3.26453
195.972	56.7898	57	0.0442015		3.2662
196.072	56.7862	57	0.0456999		3.26786
196.172	56.7827	57	0.0472217		3.26953
196.272	56.7792	57	0.048767		3.2712
196.372	56.7756	57	0.0503356		3.27286
196.472	56.7721	57	0.0519275		3.27453
196.572	56.7686	57.0003	0.0536824		3.2762
196.672	56.7651	57.0019	0.0560743		3.27786
196.772	56.7616	57.0052	0.0593491		3.27953
196.872	56.7581	57.0106	0.0637844		3.2812
196.972	56.7546	57.0185	0.0696829		3.28286
197.072	56.7511	57.0291	0.0773194		3.28453
197.172	56.7476	57.0423	0.086887		3.2862
197.272	56.7441	57.0579	0.0984744		3.28786
197.372	56.7406	57.0754	0.112084		3.28953
197.472	56.7371	57.0944	0.127671		3.2912
197.572	56.7336	57.1141	0.144742		3.29286
197.672	56.7301	57.1322	0.161686		3.29453
197.772	56.7267	57.1474	0.177044		3.2962
197.872	56.7232	57.1564	0.187648		3.29786
197.972	56.7197	57.1522	0.187051		3.29953
198.072	56.7163	57.1275	0.169116		3.3012
198.172	56.7128	57.0848	0.138409		3.30286
198.272	56.7093	57.0326	0.104474		3.30453
198.372	56.7059	56.9758	0.0728641		3.3062
198.472	56.7024	56.9168	0.0459738		3.30786
198.572	56.699	56.8572	0.0250235		3.30953
198.672	56.6955	56.7989	0.010684		3.3112
198.772	56.6921	56.7435	0.00264654		3.31286
198.872	56.6886	56.6946	3.54186e-05		3.31453
198.972	56.6852	56.6604	0.000614004		3.3162
199.072	56.6818	56.6512	0.000933981		3.31786
199.172	56.6783	56.6633	0.000227533		3.31953
199.272	56.6749	56.6857	0.000115729		3.3212
[truncated: 2,810 more rows]
