# Supplementary material for: Design, characterization, and modeling of microcirculation systems with integrated oxygenators
Source: Copernicus journal article supplement (doi:10.5194/jsss-5-221-2016), 2016-06-24
Supplement: Supplementary file 8 [file Verhalten-Membran.xls]

## Sheet: Tabelle1
t[s]	d=100µm	d=200µm	d=300µm	d=400µm	d=500µm	d=600µm	d=700µm	d=800µm	d=900µm	d=1000 µm
1	1	1	1	1	1	1	1	1	1	1
2	1	1	1	1	1	1	1	1	1	1
3	1	1	1	1	1	1	1	1	1	1
4	1	1	1	1	1	1	1	1	1	1
5	1	1	1	1	1	1	1	1	1	1
6	1	1	1	1	1	1	1	1	1	1
7	1	1	1	1	1	1	1	1	1	1
8	1	1	1	1	1	1	1	1	1	1
9	1	1	1	1	1	1	1	1	1	1
10	1	1	1	1	1	1	1	1	1	1
11	1	1	1	1	1	1	1	1	1	1
12	1	1	1	1	1	1	1	1	1	1
13	1	1	1	1	1	1	1	1	1	1
14	1	1	1	1	1	1	1	1	1	1
15	1	1	1	1	1	1	1	1	1	1
16	1	1	1	1	1	1	1	1	1	1
17	1	1	1	1	1	1	1	1	1	1
18	1	1	1	1	1	1	1	1	1	1
19	1	1	1	1	1	1	1	1	1	1
20	1	1	1	1	1	1	1	1	1	1
21	0.877431	0.997528	0.999969	0.999999	1	1	1	1	1	1
22	0.724336	0.971054	0.998554	0.999935	0.999996	1	1	1	1	1
23	0.626715	0.925666	0.992071	0.999375	0.99995	0.999995	0.999999	1	1	1
24	0.55957	0.877402	0.979327	0.997529	0.999732	0.999969	0.999996	0.999999	1	1
25	0.510018	0.83238	0.96186	0.993784	0.999135	0.99988	0.999982	0.999997	0.999999	1
26	0.471572	0.791994	0.941664	0.987977	0.997942	0.999665	0.999943	0.999989	0.999998	1
27	0.440638	0.756141	0.920265	0.980286	0.995989	0.999249	0.999859	0.999972	0.999994	0.999999
28	0.415057	0.724303	0.898649	0.971054	0.993196	0.998558	0.999701	0.999936	0.999985	0.999996
29	0.393448	0.695915	0.877402	0.960661	0.989554	0.99753	0.999439	0.999871	0.999969	0.999992
30	0.37488	0.670463	0.856849	0.949449	0.98511	0.99612	0.999044	0.999765	0.99994	0.999984
31	0.358701	0.647512	0.837155	0.937708	0.979944	0.994304	0.998488	0.999605	0.999895	0.999971
32	0.344441	0.626698	0.818387	0.925666	0.974153	0.992075	0.997746	0.999376	0.999826	0.99995
33	0.331748	0.607723	0.800558	0.913499	0.967838	0.989441	0.996802	0.999066	0.999728	0.999919
34	0.320354	0.590339	0.783646	0.90134	0.961094	0.986421	0.995643	0.998662	0.999593	0.999874
35	0.310054	0.574342	0.767613	0.889284	0.954012	0.98304	0.994263	0.998153	0.999415	0.999813
36	0.300682	0.55956	0.752411	0.877401	0.94667	0.97933	0.992659	0.99753	0.999187	0.999732
37	0.292107	0.545848	0.737991	0.865742	0.939137	0.975324	0.990835	0.996786	0.998904	0.999627
38	0.284222	0.533086	0.7243	0.854338	0.931471	0.971055	0.988796	0.995916	0.998558	0.999495
39	0.27694	0.52117	0.711289	0.843211	0.923724	0.966557	0.986551	0.994916	0.998146	0.999333
40	0.270187	0.510012	0.698913	0.832374	0.915936	0.961862	0.984112	0.993786	0.997662	0.999135
41	0.263902	0.499534	0.687125	0.821834	0.908142	0.956999	0.981489	0.992525	0.997104	0.998901
42	0.258035	0.489671	0.675886	0.811591	0.90037	0.951996	0.978695	0.991134	0.996468	0.998625
43	0.25254	0.480366	0.665158	0.801645	0.892644	0.946877	0.975745	0.989618	0.995752	0.998307
44	0.24738	0.471568	0.654906	0.791989	0.884983	0.941665	0.972652	0.987978	0.994955	0.997942
45	0.242522	0.463233	0.645097	0.782618	0.877401	0.936381	0.969428	0.98622	0.994077	0.99753
46	0.237938	0.455321	0.635703	0.773525	0.869911	0.931043	0.966087	0.984348	0.993117	0.997068
47	0.233603	0.447799	0.626696	0.7647	0.862521	0.925666	0.962641	0.982369	0.992076	0.996555
48	0.229495	0.440635	0.618051	0.756136	0.85524	0.920265	0.959102	0.980287	0.990954	0.99599
49	0.225596	0.433802	0.609747	0.747823	0.848071	0.914853	0.955481	0.978108	0.989754	0.995372
50	0.221887	0.427276	0.601761	0.739752	0.84102	0.90944	0.951789	0.97584	0.988476	0.994701
51	0.218355	0.421033	0.594074	0.731914	0.834088	0.904036	0.948035	0.973487	0.987124	0.993975
52	0.214986	0.415055	0.586669	0.724299	0.827278	0.898649	0.944228	0.971055	0.9857	0.993197
53	0.211767	0.409323	0.57953	0.716901	0.820589	0.893286	0.940377	0.968551	0.984205	0.992365
54	0.208687	0.40382	0.572641	0.709708	0.814022	0.887954	0.93649	0.965981	0.982644	0.99148
55	0.205738	0.398533	0.565988	0.702715	0.807577	0.882657	0.932573	0.963349	0.981018	0.990543
56	0.202909	0.393446	0.559558	0.695912	0.801253	0.877401	0.928633	0.960661	0.97933	0.989555
57	0.200193	0.388548	0.55334	0.689292	0.795047	0.872189	0.924675	0.957923	0.977584	0.988516
58	0.197583	0.383828	0.547322	0.682848	0.78896	0.867025	0.920707	0.955138	0.975783	0.987428
59	0.195072	0.379274	0.541493	0.676573	0.782988	0.86191	0.916731	0.952312	0.973929	0.986293
60	0.192654	0.374878	0.535845	0.67046	0.777129	0.856848	0.912754	0.949449	0.972025	0.98511
61	0.190323	0.37063	0.530368	0.664503	0.771383	0.85184	0.908778	0.946554	0.970074	0.983883
62	0.188075	0.366523	0.525053	0.658696	0.765745	0.846888	0.904807	0.943629	0.96808	0.982612
63	0.185903	0.362549	0.519894	0.653033	0.760215	0.841992	0.900845	0.940679	0.966045	0.981299
64	0.183805	0.3587	0.514882	0.647509	0.754789	0.837154	0.896895	0.937708	0.963971	0.979945
65	0.181776	0.354971	0.510011	0.642118	0.749466	0.832374	0.892959	0.934718	0.961862	0.978552
66	0.179813	0.351354	0.505274	0.636855	0.744242	0.827653	0.889039	0.931712	0.95972	0.977121
67	0.177911	0.347846	0.500666	0.631716	0.739116	0.82299	0.885139	0.928694	0.957547	0.975655
68	0.176068	0.34444	0.496181	0.626696	0.734085	0.818387	0.881259	0.925666	0.955346	0.974154
69	0.174281	0.341131	0.491813	0.62179	0.729147	0.813842	0.877401	0.92263	0.953118	0.97262
70	0.172547	0.337916	0.487557	0.616995	0.724299	0.809355	0.873568	0.919589	0.950867	0.971055
71	0.170864	0.334789	0.483409	0.612306	0.71954	0.804927	0.869759	0.916545	0.948595	0.969461
72	0.169229	0.331747	0.479364	0.607721	0.714866	0.800557	0.865977	0.913499	0.946302	0.967838
73	0.167639	0.328786	0.475418	0.603234	0.710276	0.796245	0.862222	0.910454	0.943992	0.966189
74	0.166093	0.325902	0.471568	0.598844	0.705768	0.791989	0.858495	0.907412	0.941665	0.964514
75	0.164589	0.323092	0.467808	0.594546	0.701339	0.787789	0.854797	0.904373	0.939325	0.962816
76	0.163125	0.320354	0.464137	0.590338	0.696988	0.783645	0.851129	0.90134	0.936971	0.961095
77	0.1617	0.317683	0.46055	0.586216	0.692712	0.779557	0.847491	0.898313	0.934607	0.959353
78	0.16031	0.315078	0.457044	0.582177	0.68851	0.775522	0.843884	0.895294	0.932233	0.957591
79	0.158956	0.312536	0.453617	0.57822	0.684379	0.771541	0.840307	0.892284	0.929851	0.95581
80	0.157635	0.310053	0.450265	0.57434	0.680318	0.767612	0.836762	0.889284	0.927462	0.954012
81	0.156347	0.307629	0.446986	0.570537	0.676326	0.763736	0.833248	0.886295	0.925067	0.952198
82	0.155089	0.30526	0.443776	0.566807	0.672399	0.759911	0.829765	0.883317	0.922668	0.950369
83	0.153862	0.302945	0.440635	0.563148	0.668537	0.756136	0.826315	0.880353	0.920265	0.948526
84	0.152662	0.300681	0.437559	0.559558	0.664739	0.752411	0.822896	0.877401	0.917861	0.94667
85	0.151491	0.298467	0.434546	0.556035	0.661002	0.748734	0.819508	0.874464	0.915455	0.944802
86	0.150346	0.296301	0.431594	0.552577	0.657324	0.745106	0.816153	0.871541	0.913048	0.942923
87	0.149226	0.294182	0.428701	0.549182	0.653706	0.741525	0.812829	0.868633	0.910642	0.941035
88	0.14813	0.292106	0.425865	0.545847	0.650144	0.73799	0.809537	0.865741	0.908238	0.939137
89	0.147059	0.290074	0.423084	0.542572	0.646638	0.734501	0.806277	0.862865	0.905836	0.937231
90	0.14601	0.288084	0.420356	0.539354	0.643186	0.731057	0.803047	0.860006	0.903436	0.935317
91	0.144983	0.286133	0.417681	0.536193	0.639787	0.727656	0.799849	0.857163	0.90104	0.933397
92	0.143978	0.284222	0.415055	0.533085	0.636439	0.724299	0.796682	0.854337	0.898649	0.931471
93	0.142993	0.282348	0.412478	0.530031	0.633143	0.720985	0.793546	0.851529	0.896262	0.92954
94	0.142028	0.28051	0.409948	0.527028	0.629895	0.717712	0.79044	0.848738	0.89388	0.927605
95	0.141082	0.278708	0.407464	0.524074	0.626696	0.71448	0.787364	0.845965	0.891505	0.925666
96	0.140155	0.276939	0.405024	0.52117	0.623543	0.711289	0.784318	0.843211	0.889136	0.923724
97	0.139245	0.275204	0.402627	0.518312	0.620436	0.708137	0.781302	0.840474	0.886774	0.921779
98	0.138353	0.273501	0.400272	0.515501	0.617374	0.705024	0.778316	0.837756	0.884419	0.919833
99	0.137478	0.271829	0.397958	0.512734	0.614356	0.70195	0.775358	0.835056	0.882071	0.917885
100	0.136619	0.270187	0.395683	0.510011	0.611381	0.698912	0.77243	0.832374	0.879732	0.915936
101	0.135776	0.268574	0.393446	0.507331	0.608448	0.695912	0.76953	0.829711	0.877401	0.913987
102	0.134949	0.266989	0.391246	0.504691	0.605555	0.692948	0.766658	0.827067	0.875079	0.912038
103	0.134136	0.265432	0.389083	0.502093	0.602703	0.690019	0.763815	0.824441	0.872766	0.910089
104	0.133338	0.263902	0.386955	0.499533	0.599889	0.687125	0.760998	0.821834	0.870462	0.908142
105	0.132553	0.262398	0.384862	0.497013	0.597114	0.684265	0.75821	0.819245	0.868168	0.906196
106	0.131783	0.260919	0.382802	0.494529	0.594376	0.681439	0.755448	0.816675	0.865884	0.904252
107	0.131025	0.259465	0.380774	0.492082	0.591675	0.678646	0.752713	0.814124	0.863609	0.90231
108	0.130281	0.258035	0.378778	0.489671	0.589009	0.675886	0.750004	0.811591	0.861345	0.90037
109	0.129549	0.256628	0.376813	0.487294	0.586379	0.673157	0.747322	0.809077	0.859091	0.898434
110	0.128829	0.255243	0.374878	0.484952	0.583783	0.67046	0.744665	0.806581	0.856848	0.8965
111	0.128121	0.253881	0.372972	0.482643	0.58122	0.667794	0.742034	0.804104	0.854616	0.89457
112	0.127424	0.25254	0.371095	0.480366	0.57869	0.665158	0.739427	0.801644	0.852394	0.892644
113	0.126739	0.25122	0.369246	0.47812	0.576193	0.662551	0.736846	0.799203	0.850183	0.890722
114	0.126064	0.24992	0.367424	0.475906	0.573727	0.659974	0.734289	0.796781	0.847983	0.888805
115	0.1254	0.24864	0.365629	0.473722	0.571292	0.657426	0.731756	0.794376	0.845795	0.886891
116	0.124747	0.24738	0.363859	0.471568	0.568887	0.654905	0.729247	0.791989	0.843618	0.884983
117	0.124103	0.246138	0.362115	0.469442	0.566512	0.652413	0.726762	0.78962	0.841452	0.88308
118	0.12347	0.244915	0.360395	0.467345	0.564166	0.649947	0.724299	0.787268	0.839297	0.881181
119	0.122846	0.243709	0.3587	0.465275	0.561848	0.647509	0.72186	0.784934	0.837154	0.879289
120	0.122231	0.242522	0.357028	0.463232	0.559558	0.645097	0.719444	0.782618	0.835022	0.877401
121	0.121625	0.241351	0.355379	0.461216	0.557296	0.64271	0.717049	0.780319	0.832902	0.87552
122	0.121029	0.240197	0.353753	0.459226	0.55506	0.64035	0.714677	0.778037	0.830794	0.873644
123	0.12044	0.239059	0.352148	0.457261	0.552851	0.638014	0.712327	0.775772	0.828697	0.871774
124	0.119861	0.237938	0.350565	0.455321	0.550668	0.635702	0.709998	0.773525	0.826611	0.869911
125	0.119289	0.236831	0.349004	0.453405	0.54851	0.633415	0.70769	0.771294	0.824538	0.868054
126	0.118726	0.23574	0.347462	0.451513	0.546377	0.631152	0.705403	0.769079	0.822476	0.866203
127	0.118171	0.234664	0.345941	0.449644	0.544268	0.628912	0.703137	0.766882	0.820425	0.864359
128	0.117623	0.233603	0.34444	0.447799	0.542183	0.626696	0.700892	0.7647	0.818386	0.862521
129	0.117083	0.232555	0.342957	0.445975	0.540121	0.624501	0.698666	0.762535	0.816359	0.860691
130	0.11655	0.231522	0.341494	0.444174	0.538083	0.622329	0.69646	0.760386	0.814344	0.858867
131	0.116024	0.230502	0.340049	0.442394	0.536067	0.620179	0.694274	0.758253	0.81234	0.85705
132	0.115505	0.229495	0.338622	0.440635	0.534074	0.618051	0.692107	0.756136	0.810347	0.85524
133	0.114993	0.228501	0.337213	0.438897	0.532102	0.615944	0.689959	0.754034	0.808366	0.853437
134	0.114488	0.22752	0.335822	0.437179	0.530152	0.613858	0.68783	0.751949	0.806397	0.851641
135	0.11399	0.226552	0.334447	0.435481	0.528223	0.611792	0.68572	0.749878	0.804439	0.849852
136	0.113498	0.225596	0.333089	0.433802	0.526314	0.609746	0.683628	0.747823	0.802492	0.848071
137	0.113012	0.224651	0.331747	0.432143	0.524426	0.607721	0.681554	0.745783	0.800557	0.846297
138	0.112532	0.223719	0.330421	0.430502	0.522558	0.605715	0.679498	0.743758	0.798633	0.844531
139	0.112059	0.222797	0.329111	0.42888	0.520709	0.603728	0.677459	0.741747	0.796721	0.842771
140	0.111591	0.221887	0.327816	0.427276	0.51888	0.60176	0.675438	0.739752	0.79482	0.84102
141	0.111129	0.220988	0.326536	0.425689	0.517069	0.599811	0.673434	0.737771	0.79293	0.839276
142	0.110673	0.2201	0.325271	0.42412	0.515278	0.597881	0.671447	0.735804	0.791051	0.837539
143	0.110222	0.219222	0.324021	0.422568	0.513504	0.595969	0.669477	0.733852	0.789183	0.83581
144	0.109777	0.218355	0.322785	0.421033	0.511749	0.594074	0.667524	0.731914	0.787326	0.834088
145	0.109337	0.217498	0.321562	0.419515	0.510011	0.592197	0.665586	0.729989	0.78548	0.832374
146	0.108902	0.216651	0.320354	0.418012	0.508291	0.590337	0.663665	0.728079	0.783645	0.830668
147	0.108472	0.215813	0.319159	0.416526	0.506587	0.588495	0.661759	0.726182	0.781821	0.828969
148	0.108048	0.214986	0.317977	0.415055	0.504901	0.586669	0.65987	0.724299	0.780008	0.827277
149	0.107628	0.214167	0.316808	0.413599	0.503231	0.58486	0.657995	0.72243	0.778206	0.825594
150	0.107214	0.213358	0.315652	0.412159	0.501578	0.583067	0.656136	0.720573	0.776414	0.823918
151	0.106803	0.212558	0.314508	0.410734	0.49994	0.581291	0.654292	0.71873	0.774633	0.82225
152	0.106398	0.211767	0.313376	0.409323	0.498319	0.57953	0.652463	0.7169	0.772862	0.820589
153	0.105997	0.210984	0.312257	0.407926	0.496713	0.577785	0.650649	0.715083	0.771102	0.818936
154	0.105601	0.21021	0.311149	0.406544	0.495122	0.576055	0.648849	0.713279	0.769352	0.81729
155	0.105209	0.209445	0.310053	0.405175	0.493546	0.57434	0.647064	0.711487	0.767612	0.815653
156	0.104821	0.208687	0.308969	0.40382	0.491985	0.572641	0.645293	0.709708	0.765883	0.814022
157	0.104438	0.207938	0.307895	0.402479	0.490439	0.570956	0.643535	0.707942	0.764164	0.8124
158	0.104059	0.207197	0.306833	0.40115	0.488907	0.569286	0.641792	0.706187	0.762455	0.810785
159	0.103683	0.206463	0.305782	0.399835	0.487389	0.56763	0.640062	0.704445	0.760756	0.809177
160	0.103312	0.205738	0.304741	0.398532	0.485885	0.565988	0.638346	0.702715	0.759068	0.807577
161	0.102945	0.205019	0.303711	0.397242	0.484395	0.56436	0.636643	0.700996	0.757389	0.805985
162	0.102582	0.204309	0.302691	0.395965	0.482918	0.562746	0.634953	0.69929	0.75572	0.8044
163	0.102222	0.203605	0.301681	0.394699	0.481455	0.561145	0.633276	0.697595	0.75406	0.802823
164	0.101867	0.202909	0.300681	0.393446	0.480004	0.559558	0.631612	0.695912	0.752411	0.801253
165	0.101514	0.20222	0.299691	0.392204	0.478567	0.557984	0.629961	0.69424	0.750771	0.79969
166	0.101166	0.201538	0.298711	0.390974	0.477142	0.556423	0.628322	0.692579	0.74914	0.798135
167	0.100821	0.200862	0.29774	0.389755	0.47573	0.554875	0.626696	0.69093	0.74752	0.796588
168	0.10048	0.200193	0.296779	0.388548	0.474331	0.55334	0.625081	0.689292	0.745908	0.795047
169	0.100142	0.199531	0.295826	0.387352	0.472943	0.551817	0.623479	0.687665	0.744306	0.793514
170	0.099807	0.198876	0.294883	0.386166	0.471568	0.550306	0.621889	0.686049	0.742713	0.791989
171	0.0994757	0.198226	0.293949	0.384992	0.470204	0.548808	0.62031	0.684443	0.74113	0.790471
172	0.0991476	0.197583	0.293023	0.383828	0.468852	0.547322	0.618744	0.682848	0.739555	0.788959
173	0.0988228	0.196947	0.292106	0.382674	0.467511	0.545847	0.617188	0.681264	0.73799	0.787456
174	0.0985011	0.196316	0.291198	0.381531	0.466182	0.544384	0.615645	0.67969	0.736434	0.785959
175	0.0981825	0.195691	0.290298	0.380397	0.464864	0.542933	0.614112	0.678126	0.734886	0.78447
176	0.097867	0.195072	0.289406	0.379274	0.463557	0.541493	0.61259	0.676573	0.733348	0.782987
177	0.0975546	0.194459	0.288522	0.378161	0.462261	0.540065	0.61108	0.67503	0.731818	0.781512
178	0.097245	0.193852	0.287647	0.377057	0.460976	0.538647	0.60958	0.673497	0.730297	0.780044
179	0.0969384	0.19325	0.286779	0.375963	0.459701	0.537241	0.608091	0.671974	0.728785	0.778583
180	0.0966347	0.192654	0.285919	0.374878	0.458437	0.535845	0.606613	0.67046	0.727281	0.777129
181	0.0963338	0.192064	0.285066	0.373802	0.457183	0.53446	0.605145	0.668957	0.725786	0.775682
182	0.0960357	0.191478	0.284222	0.372736	0.455939	0.533085	0.603688	0.667463	0.724299	0.774242
183	0.0957403	0.190898	0.283384	0.371679	0.454705	0.531721	0.602241	0.665978	0.722821	0.772809
184	0.0954476	0.190323	0.282554	0.37063	0.453481	0.530368	0.600804	0.664503	0.721351	0.771383
185	0.0951576	0.189754	0.281731	0.369591	0.452267	0.529024	0.599376	0.663038	0.719889	0.769963
186	0.0948702	0.189189	0.280915	0.36856	0.451063	0.527691	0.597959	0.661582	0.718436	0.76855
187	0.0945854	0.188629	0.280106	0.367537	0.449867	0.526367	0.596552	0.660134	0.71699	0.767144
188	0.0943031	0.188075	0.279305	0.366523	0.448682	0.525053	0.595154	0.658696	0.715553	0.765745
189	0.0940233	0.187525	0.278509	0.365517	0.447505	0.523749	0.593766	0.657267	0.714124	0.764353
190	0.093746	0.18698	0.277721	0.36452	0.446338	0.522455	0.592388	0.655847	0.712703	0.762967
191	0.0934711	0.186439	0.276939	0.36353	0.44518	0.52117	0.591019	0.654436	0.711289	0.761588
192	0.0931986	0.185903	0.276164	0.362549	0.444031	0.519894	0.589659	0.653033	0.709883	0.760215
193	0.0929285	0.185372	0.275395	0.361575	0.44289	0.518627	0.588308	0.651639	0.708485	0.758849
194	0.0926607	0.184846	0.274633	0.360609	0.441758	0.51737	0.586966	0.650254	0.707095	0.757489
195	0.0923952	0.184323	0.273877	0.359651	0.440635	0.516121	0.585633	0.648877	0.705713	0.756136
196	0.092132	0.183805	0.273127	0.3587	0.43952	0.514882	0.58431	0.647509	0.704338	0.754789
197	0.091871	0.183292	0.272383	0.357756	0.438414	0.513651	0.582995	0.646149	0.70297	0.753449
198	0.0916122	0.182782	0.271645	0.356821	0.437315	0.512429	0.581688	0.644797	0.70161	0.752115
199	0.0913555	0.182277	0.270913	0.355892	0.436225	0.511216	0.58039	0.643453	0.700258	0.750787
200	0.091101	0.181776	0.270187	0.35497	0.435143	0.510011	0.579101	0.642118	0.698912	0.749466
201	0.0908486	0.181279	0.269466	0.354056	0.434069	0.508814	0.57782	0.64079	0.697574	0.748151
202	0.0905983	0.180787	0.268752	0.353149	0.433003	0.507626	0.576548	0.639471	0.696243	0.746842
203	0.09035	0.180298	0.268042	0.352248	0.431945	0.506446	0.575283	0.638159	0.69492	0.745539
204	0.0901038	0.179813	0.267339	0.351354	0.430894	0.505274	0.574027	0.636855	0.693603	0.744242
205	0.0898596	0.179332	0.266641	0.350467	0.429851	0.50411	0.572779	0.635559	0.692294	0.742952
206	0.0896173	0.178854	0.265948	0.349587	0.428815	0.502955	0.571539	0.63427	0.690991	0.741667
207	0.089377	0.178381	0.265261	0.348713	0.427787	0.501806	0.570307	0.632989	0.689695	0.740389
208	0.0891385	0.177911	0.264579	0.347846	0.426766	0.500666	0.569082	0.631716	0.688407	0.739116
209	0.088902	0.177445	0.263902	0.346985	0.425752	0.499533	0.567865	0.63045	0.687125	0.73785
210	0.0886674	0.176983	0.263231	0.34613	0.424746	0.498408	0.566656	0.629191	0.68585	0.736589
211	0.0884345	0.176524	0.262564	0.345282	0.423746	0.497291	0.565455	0.62794	0.684581	0.735334
212	0.0882035	0.176068	0.261902	0.34444	0.422754	0.496181	0.564261	0.626695	0.68332	0.734085
213	0.0879743	0.175616	0.261246	0.343604	0.421768	0.495078	0.563074	0.625459	0.682064	0.732842
214	0.0877469	0.175168	0.260594	0.342774	0.420789	0.493982	0.561895	0.624229	0.680816	0.731605
215	0.0875212	0.174723	0.259947	0.341949	0.419817	0.492894	0.560723	0.623006	0.679574	0.730373
216	0.0872973	0.174281	0.259305	0.341131	0.418852	0.491812	0.559558	0.62179	0.678338	0.729147
217	0.087075	0.173843	0.258667	0.340319	0.417893	0.490738	0.558401	0.620581	0.677109	0.727927
218	0.0868545	0.173408	0.258035	0.339512	0.41694	0.489671	0.55725	0.619379	0.675886	0.726712
219	0.0866356	0.172976	0.257406	0.338711	0.415994	0.48861	0.556106	0.618183	0.674669	0.725503
220	0.0864183	0.172547	0.256783	0.337916	0.415055	0.487557	0.55497	0.616995	0.673459	0.724299
221	0.0862027	0.172122	0.256164	0.337126	0.414122	0.48651	0.55384	0.615813	0.672255	0.723101
222	0.0859886	0.1717	0.255549	0.336341	0.413195	0.485469	0.552717	0.614638	0.671057	0.721909
223	0.0857762	0.17128	0.254938	0.335562	0.412274	0.484436	0.5516	0.613469	0.669865	0.720721
224	0.0855653	0.170864	0.254332	0.334789	0.411359	0.483409	0.550491	0.612306	0.668679	0.71954
225	0.0853559	0.170451	0.253731	0.334021	0.41045	0.482388	0.549388	0.61115	0.667499	0.718363
226	0.0851481	0.17004	0.253133	0.333257	0.409547	0.481374	0.548291	0.610001	0.666326	0.717192
227	0.0849418	0.169633	0.25254	0.3325	0.408651	0.480366	0.547201	0.608858	0.665158	0.716027
228	0.084737	0.169229	0.25195	0.331747	0.40776	0.479364	0.546117	0.607721	0.663996	0.714866
229	0.0845336	0.168827	0.251365	0.330999	0.406874	0.478368	0.54504	0.60659	0.662839	0.713711
230	0.0843317	0.168428	0.250784	0.330256	0.405995	0.477379	0.543968	0.605465	0.661689	0.712561
231	0.0841312	0.168032	0.250207	0.329519	0.405121	0.476395	0.542904	0.604347	0.660544	0.711416
232	0.0839322	0.167639	0.249634	0.328786	0.404252	0.475418	0.541845	0.603234	0.659405	0.710276
233	0.0837345	0.167249	0.249064	0.328058	0.403389	0.474447	0.540792	0.602128	0.658272	0.709142
234	0.0835382	0.166861	0.248499	0.327334	0.402532	0.473481	0.539745	0.601027	0.657144	0.708012
235	0.0833434	0.166476	0.247937	0.326616	0.40168	0.472521	0.538705	0.599933	0.656022	0.706887
236	0.0831498	0.166093	0.247379	0.325902	0.400833	0.471567	0.53767	0.598844	0.654905	0.705768
237	0.0829576	0.165714	0.246825	0.325193	0.399992	0.470619	0.536641	0.597761	0.653794	0.704653
238	0.0827667	0.165336	0.246275	0.324488	0.399156	0.469677	0.535618	0.596684	0.652688	0.703544
239	0.0825771	0.164962	0.245728	0.323788	0.398325	0.46874	0.534601	0.595612	0.651588	0.702439
240	0.0823889	0.164589	0.245185	0.323092	0.397499	0.467808	0.533589	0.594546	0.650493	0.701339
241	0.0822019	0.16422	0.244645	0.322401	0.396679	0.466882	0.532583	0.593486	0.649403	0.700244
242	0.0820161	0.163852	0.244109	0.321714	0.395863	0.465962	0.531583	0.592431	0.648319	0.699154
243	0.0818316	0.163488	0.243577	0.321032	0.395052	0.465047	0.530588	0.591381	0.64724	0.698068
244	0.0816484	0.163125	0.243047	0.320354	0.394247	0.464137	0.529599	0.590337	0.646166	0.696988
245	0.0814663	0.162765	0.242522	0.31968	0.393446	0.463232	0.528615	0.589299	0.645097	0.695912
246	0.0812855	0.162408	0.241999	0.31901	0.39265	0.462333	0.527636	0.588266	0.644033	0.69484
247	0.0811059	0.162052	0.24148	0.318345	0.391859	0.461439	0.526663	0.587238	0.642974	0.693774
248	0.0809274	0.161699	0.240964	0.317683	0.391072	0.46055	0.525695	0.586215	0.641921	0.692712
249	0.0807502	0.161349	0.240452	0.317026	0.39029	0.459666	0.524733	0.585198	0.640872	0.691654
250	0.080574	0.161	0.239943	0.316373	0.389513	0.458787	0.523776	0.584186	0.639828	0.690602
251	0.0803991	0.160654	0.239437	0.315723	0.38874	0.457913	0.522823	0.583179	0.63879	0.689553
252	0.0802252	0.16031	0.238934	0.315078	0.387972	0.457044	0.521876	0.582177	0.637756	0.68851
253	0.0800525	0.159968	0.238434	0.314437	0.387209	0.45618	0.520935	0.58118	0.636727	0.68747
254	0.0798809	0.159629	0.237938	0.313799	0.38645	0.455321	0.519998	0.580188	0.635702	0.686435
255	0.0797104	0.159291	0.237444	0.313165	0.385695	0.454466	0.519066	0.579202	0.634683	0.685405
256	0.0795409	0.158956	0.236954	0.312536	0.384945	0.453617	0.518139	0.57822	0.633668	0.684379
257	0.0793726	0.158623	0.236466	0.311909	0.384199	0.452772	0.517217	0.577243	0.632658	0.683357
258	0.0792053	0.158292	0.235982	0.311287	0.383457	0.451932	0.516299	0.57627	0.631653	0.68234
259	0.079039	0.157962	0.2355	0.310668	0.38272	0.451096	0.515387	0.575303	0.630652	0.681327
260	0.0788738	0.157635	0.235021	0.310053	0.381987	0.450265	0.514479	0.57434	0.629656	0.680318
261	0.0787096	0.15731	0.234546	0.309442	0.381258	0.449438	0.513576	0.573383	0.628665	0.679314
262	0.0785464	0.156987	0.234073	0.308834	0.380533	0.448616	0.512678	0.572429	0.627678	0.678313
263	0.0783843	0.156666	0.233603	0.30823	0.379812	0.447799	0.511784	0.571481	0.626695	0.677317
264	0.0782231	0.156347	0.233135	0.307629	0.379095	0.446986	0.510895	0.570537	0.625718	0.676325
265	0.0780629	0.15603	0.232671	0.307031	0.378383	0.446177	0.510011	0.569598	0.624744	0.675338
266	0.0779038	0.155714	0.232209	0.306438	0.377674	0.445372	0.509131	0.568663	0.623775	0.674354
267	0.0777455	0.155401	0.23175	0.305847	0.376969	0.444572	0.508256	0.567733	0.62281	0.673375
268	0.0775882	0.155089	0.231294	0.30526	0.376268	0.443776	0.507385	0.566807	0.62185	0.672399
269	0.0774319	0.15478	0.23084	0.304676	0.375571	0.442985	0.506518	0.565886	0.620894	0.671428
270	0.0772765	0.154472	0.230389	0.304096	0.374878	0.442197	0.505656	0.564969	0.619942	0.67046
271	0.0771221	0.154166	0.229941	0.303519	0.374189	0.441414	0.504798	0.564056	0.618994	0.669497
272	0.0769685	0.153862	0.229495	0.302945	0.373503	0.440635	0.503945	0.563148	0.618051	0.668537
273	0.0768159	0.153559	0.229052	0.302374	0.372821	0.43986	0.503096	0.562244	0.617112	0.667582
274	0.0766642	0.153259	0.228611	0.301807	0.372143	0.439089	0.502251	0.561345	0.616177	0.66663
275	0.0765134	0.15296	0.228173	0.301242	0.371468	0.438322	0.50141	0.560449	0.615246	0.665683
276	0.0763634	0.152662	0.227737	0.300681	0.370797	0.437559	0.500573	0.559558	0.614319	0.664739
277	0.0762143	0.152367	0.227304	0.300123	0.37013	0.4368	0.499741	0.558671	0.613397	0.663799
278	0.0760661	0.152073	0.226873	0.299568	0.369466	0.436045	0.498913	0.557788	0.612478	0.662863
279	0.0759188	0.151781	0.226445	0.299016	0.368806	0.435293	0.498088	0.55691	0.611564	0.66193
280	0.0757723	0.151491	0.226019	0.298467	0.36815	0.434546	0.497268	0.556035	0.610653	0.661002
281	0.0756267	0.151202	0.225596	0.297921	0.367496	0.433802	0.496452	0.555165	0.609746	0.660077
282	0.0754818	0.150915	0.225174	0.297378	0.366847	0.433062	0.495639	0.554298	0.608844	0.659156
283	0.0753378	0.150629	0.224756	0.296838	0.3662	0.432326	0.494831	0.553435	0.607945	0.658238
284	0.0751947	0.150345	0.224339	0.296301	0.365557	0.431594	0.494027	0.552577	0.60705	0.657324
285	0.0750523	0.150063	0.223925	0.295767	0.364918	0.430865	0.493226	0.551722	0.606159	0.656414
286	0.159116	0.150946	0.223933	0.295767	0.364918	0.430865	0.493226	0.551722	0.606159	0.656414
287	0.297916	0.164975	0.2244	0.295783	0.364918	0.430865	0.493226	0.551722	0.606159	0.656414
288	0.39473	0.196059	0.227198	0.295954	0.36493	0.430866	0.493226	0.551722	0.606159	0.656414
289	0.463668	0.234128	0.23393	0.296632	0.364992	0.430872	0.493227	0.551722	0.606159	0.656414
290	0.515492	0.272659	0.244598	0.298237	0.365186	0.430896	0.49323	0.551723	0.606159	0.656414
291	0.556171	0.30904	0.258294	0.301067	0.365622	0.43096	0.49324	0.551725	0.606159	0.656414
292	0.589167	0.342482	0.273965	0.305225	0.366415	0.431094	0.493263	0.551729	0.60616	0.656414
293	0.616615	0.37293	0.290742	0.310657	0.367659	0.431338	0.49331	0.551738	0.606162	0.656415
294	0.639908	0.400594	0.307989	0.317216	0.369418	0.43173	0.493392	0.551756	0.606166	0.656416
295	0.659997	0.425761	0.325276	0.324712	0.371721	0.432307	0.493525	0.551787	0.606174	0.656418
296	0.677553	0.448722	0.342321	0.332952	0.374569	0.4331	0.493725	0.551835	0.606186	0.656421
297	0.693065	0.469743	0.358951	0.341755	0.377938	0.434133	0.494006	0.551909	0.606205	0.656426
298	0.706902	0.48906	0.375062	0.350965	0.381792	0.435422	0.494384	0.552014	0.606234	0.656435
299	0.719345	0.506876	0.390599	0.36045	0.386085	0.436974	0.494871	0.552157	0.606276	0.656447
300	0.730612	0.523366	0.405538	0.370101	0.390764	0.43879	0.49548	0.552346	0.606333	0.656464
301	0.740878	0.538681	0.419875	0.379831	0.395779	0.440865	0.496218	0.552587	0.606409	0.656488
302	0.750283	0.552948	0.433622	0.389571	0.40108	0.443191	0.497093	0.552886	0.606507	0.65652
303	0.75894	0.56628	0.446795	0.399267	0.40662	0.445755	0.498108	0.553251	0.606632	0.656562
304	0.766943	0.578771	0.459417	0.408876	0.412355	0.448542	0.499266	0.553684	0.606785	0.656615
305	0.774371	0.590504	0.471513	0.418366	0.418248	0.451535	0.500567	0.554192	0.606971	0.656682
306	0.781289	0.601553	0.48311	0.427713	0.424262	0.454718	0.502009	0.554778	0.607194	0.656764
307	0.787754	0.611979	0.494233	0.4369	0.430368	0.458073	0.503589	0.555443	0.607455	0.656862
308	0.793812	0.62184	0.504908	0.445915	0.436538	0.461583	0.505304	0.556191	0.607757	0.65698
309	0.799504	0.631183	0.51516	0.454747	0.442749	0.465232	0.507147	0.557022	0.608104	0.657118
310	0.804866	0.640052	0.525012	0.463393	0.448982	0.469003	0.509114	0.557936	0.608496	0.657279
311	0.809928	0.648485	0.534487	0.471849	0.455218	0.472881	0.511199	0.558935	0.608937	0.657463
312	0.814718	0.656517	0.543606	0.480115	0.461443	0.476853	0.513394	0.560016	0.609427	0.657674
313	0.819258	0.664178	0.552389	0.48819	0.467644	0.480904	0.515693	0.561179	0.609968	0.657911
314	0.82357	0.671496	0.560854	0.496077	0.473811	0.485024	0.518089	0.562423	0.610559	0.658177
315	0.827673	0.678495	0.569019	0.503778	0.479935	0.4892	0.520574	0.563744	0.611203	0.658472
316	0.831582	0.685199	0.5769	0.511297	0.486007	0.493422	0.523144	0.565141	0.6119	0.658798
317	0.835312	0.691626	0.584512	0.518638	0.492022	0.497681	0.52579	0.566612	0.612648	0.659155
318	0.838877	0.697796	0.59187	0.525804	0.497975	0.501969	0.528506	0.568153	0.613449	0.659545
319	0.842289	0.703725	0.598986	0.5328	0.503861	0.506278	0.531286	0.569762	0.614301	0.659968
320	0.845557	0.709428	0.605873	0.539631	0.509678	0.5106	0.534124	0.571435	0.615205	0.660424
321	0.848693	0.71492	0.612543	0.546301	0.515422	0.514929	0.537015	0.573171	0.616159	0.660914
322	0.851704	0.720212	0.619007	0.552815	0.521092	0.51926	0.539952	0.574965	0.617162	0.661439
323	0.854598	0.725317	0.625274	0.559178	0.526685	0.523588	0.542932	0.576814	0.618214	0.661997
324	0.857384	0.730246	0.631354	0.565394	0.532201	0.527908	0.545949	0.578716	0.619314	0.66259
325	0.860067	0.735008	0.637255	0.571468	0.53764	0.532216	0.548998	0.580667	0.620459	0.663217
326	0.862653	0.739613	0.642987	0.577404	0.543001	0.536509	0.552076	0.582664	0.621649	0.663879
327	0.865149	0.744068	0.648557	0.583206	0.548283	0.540782	0.555178	0.584705	0.622883	0.664574
328	0.86756	0.748383	0.653973	0.58888	0.553488	0.545034	0.5583	0.586787	0.624158	0.665303
329	0.86989	0.752564	0.65924	0.594428	0.558615	0.549262	0.56144	0.588906	0.625474	0.666065
330	0.872143	0.756617	0.664366	0.599855	0.563665	0.553464	0.564594	0.591061	0.626829	0.66686
331	0.874324	0.76055	0.669357	0.605165	0.568639	0.557637	0.567758	0.593248	0.628221	0.667687
332	0.876437	0.764368	0.674219	0.610362	0.573537	0.56178	0.570931	0.595465	0.629649	0.668545
333	0.878485	0.768076	0.678957	0.615449	0.578361	0.565892	0.574109	0.59771	0.631112	0.669435
334	0.880471	0.77168	0.683575	0.620429	0.583111	0.569971	0.57729	0.59998	0.632607	0.670354
335	0.882398	0.775185	0.68808	0.625307	0.587788	0.574017	0.580473	0.602273	0.634134	0.671304
336	0.88427	0.778595	0.692475	0.630084	0.592395	0.578028	0.583654	0.604587	0.635691	0.672282
337	0.886088	0.781913	0.696765	0.634766	0.596931	0.582003	0.586832	0.60692	0.637276	0.673289
338	0.887855	0.785145	0.700953	0.639353	0.601397	0.585942	0.590005	0.60927	0.638888	0.674323
339	0.889574	0.788294	0.705045	0.643849	0.605796	0.589845	0.593172	0.611635	0.640526	0.675383
340	0.891247	0.791363	0.709043	0.648258	0.610128	0.593711	0.596332	0.614014	0.642187	0.67647
341	0.892875	0.794356	0.71295	0.652581	0.614395	0.59754	0.599482	0.616405	0.643872	0.677581
342	0.894462	0.797276	0.716771	0.656822	0.618598	0.601331	0.602621	0.618806	0.645578	0.678717
343	0.896007	0.800125	0.720509	0.660982	0.622737	0.605084	0.60575	0.621216	0.647305	0.679876
344	0.897514	0.802907	0.724165	0.665065	0.626815	0.6088	0.608865	0.623633	0.64905	0.681057
345	0.898984	0.805623	0.727744	0.669072	0.630832	0.612478	0.611967	0.626056	0.650813	0.68226
346	0.900418	0.808278	0.731248	0.673005	0.63479	0.616119	0.615055	0.628484	0.652593	0.683485
347	0.901818	0.810872	0.734679	0.676867	0.63869	0.619722	0.618128	0.630916	0.654388	0.684729
348	0.903184	0.813409	0.73804	0.68066	0.642533	0.623288	0.621185	0.633351	0.656198	0.685993
349	0.904519	0.815889	0.741333	0.684386	0.646319	0.626816	0.624226	0.635786	0.658021	0.687276
350	0.905824	0.818316	0.744561	0.688046	0.650052	0.630308	0.627249	0.638223	0.659857	0.688576
351	0.907099	0.820692	0.747725	0.691643	0.65373	0.633762	0.630255	0.640659	0.661704	0.689893
352	0.908346	0.823017	0.750828	0.695178	0.657356	0.637181	0.633244	0.643094	0.663561	0.691227
353	0.909565	0.825294	0.753872	0.698653	0.660931	0.640563	0.636214	0.645526	0.665428	0.692577
354	0.910759	0.827524	0.756858	0.70207	0.664455	0.643909	0.639165	0.647956	0.667304	0.693941
355	0.911927	0.829709	0.759788	0.70543	0.66793	0.64722	0.642097	0.650383	0.669188	0.695319
356	0.913071	0.831851	0.762664	0.708734	0.671357	0.650495	0.64501	0.652805	0.671078	0.696711
357	0.914191	0.833951	0.765488	0.711984	0.674736	0.653736	0.647903	0.655222	0.672975	0.698116
358	0.915288	0.836009	0.768261	0.715183	0.678069	0.656942	0.650777	0.657634	0.674878	0.699533
359	0.916363	0.838029	0.770984	0.718329	0.681356	0.660114	0.653631	0.660039	0.676786	0.700962
360	0.917417	0.84001	0.77366	0.721427	0.684599	0.663253	0.656465	0.662439	0.678697	0.702402
361	0.91845	0.841954	0.776289	0.724475	0.687799	0.666358	0.659278	0.664831	0.680613	0.703852
362	0.919464	0.843862	0.778873	0.727477	0.690956	0.66943	0.662072	0.667215	0.682531	0.705312
363	0.920457	0.845735	0.781413	0.730432	0.694071	0.67247	0.664845	0.669592	0.684452	0.706781
364	0.921433	0.847575	0.78391	0.733342	0.697145	0.675478	0.667598	0.671961	0.686374	0.708258
365	0.92239	0.849382	0.786366	0.736209	0.700179	0.678454	0.670331	0.674321	0.688298	0.709744
366	0.923329	0.851157	0.788781	0.739033	0.703174	0.681399	0.673043	0.676672	0.690223	0.711238
367	0.924252	0.852901	0.791157	0.741815	0.70613	0.684313	0.675735	0.679014	0.692148	0.712738
368	0.925158	0.854615	0.793495	0.744556	0.709048	0.687197	0.678406	0.681346	0.694073	0.714245
369	0.926048	0.8563	0.795796	0.747257	0.711929	0.690051	0.681058	0.683668	0.695998	0.715758
370	0.926922	0.857957	0.79806	0.74992	0.714774	0.692875	0.683689	0.685981	0.697921	0.717277
371	0.927781	0.859586	0.800289	0.752545	0.717583	0.69567	0.6863	0.688283	0.699843	0.718802
372	0.928625	0.861188	0.802484	0.755132	0.720358	0.698436	0.688891	0.690575	0.701763	0.720331
373	0.929456	0.862765	0.804645	0.757684	0.723098	0.701174	0.691462	0.692856	0.703681	0.721864
374	0.930272	0.864315	0.806773	0.7602	0.725805	0.703883	0.694013	0.695126	0.705597	0.723402
375	0.931074	0.865842	0.80887	0.762682	0.728478	0.706566	0.696544	0.697385	0.70751	0.724943
376	0.931864	0.867344	0.810935	0.76513	0.73112	0.709221	0.699056	0.699633	0.70942	0.726487
377	0.932641	0.868822	0.81297	0.767544	0.733729	0.711849	0.701548	0.70187	0.711327	0.728034
378	0.933405	0.870278	0.814976	0.769927	0.736308	0.71445	0.70402	0.704095	0.713229	0.729584
379	0.934157	0.871712	0.816952	0.772278	0.738856	0.717026	0.706474	0.706309	0.715128	0.731136
380	0.934898	0.873124	0.818901	0.774598	0.741375	0.719576	0.708908	0.708512	0.717023	0.73269
381	0.935627	0.874515	0.820822	0.776887	0.743864	0.722101	0.711323	0.710702	0.718913	0.734246
382	0.936344	0.875885	0.822716	0.779147	0.746324	0.7246	0.713719	0.712882	0.720799	0.735803
383	0.937051	0.877235	0.824583	0.781378	0.748756	0.727075	0.716097	0.715049	0.72268	0.737361
384	0.937747	0.878565	0.826425	0.783581	0.75116	0.729526	0.718456	0.717204	0.724556	0.738919
385	0.938433	0.879877	0.828242	0.785756	0.753537	0.731953	0.720796	0.719348	0.726427	0.740478
386	0.939109	0.881169	0.830035	0.787904	0.755887	0.734356	0.723119	0.72148	0.728292	0.742038
387	0.939774	0.882443	0.831803	0.790025	0.75821	0.736736	0.725423	0.7236	0.730152	0.743597
388	0.94043	0.8837	0.833548	0.79212	0.760508	0.739093	0.727709	0.725708	0.732006	0.745156
389	0.941077	0.884939	0.83527	0.794189	0.762781	0.741428	0.729977	0.727804	0.733854	0.746715
390	0.941715	0.886161	0.836969	0.796234	0.765029	0.74374	0.732228	0.729888	0.735696	0.748272
391	0.942343	0.887366	0.838647	0.798253	0.767252	0.746031	0.734461	0.731961	0.737533	0.749829
392	0.942963	0.888555	0.840303	0.800249	0.769451	0.748299	0.736677	0.734021	0.739362	0.751385
393	0.943574	0.889729	0.841938	0.802221	0.771627	0.750547	0.738875	0.73607	0.741186	0.75294
394	0.944177	0.890886	0.843552	0.80417	0.773779	0.752773	0.741057	0.738106	0.743003	0.754493
395	0.944771	0.892029	0.845147	0.806096	0.775909	0.754979	0.743222	0.740131	0.744814	0.756044
396	0.945358	0.893156	0.846721	0.808	0.778016	0.757164	0.74537	0.742144	0.746618	0.757593
397	0.945937	0.894269	0.848276	0.809882	0.780101	0.75933	0.747502	0.744145	0.748415	0.759141
398	0.946508	0.895368	0.849813	0.811743	0.782164	0.761475	0.749617	0.746134	0.750205	0.760686
399	0.947072	0.896452	0.85133	0.813583	0.784206	0.763601	0.751716	0.748112	0.751988	0.762229
400	0.947628	0.897524	0.85283	0.815401	0.786227	0.765707	0.753799	0.750078	0.753765	0.76377
401	0.948177	0.898581	0.854311	0.8172	0.788228	0.767795	0.755866	0.752032	0.755534	0.765308
402	0.948719	0.899626	0.855775	0.818979	0.790208	0.769863	0.757918	0.753975	0.757297	0.766843
403	0.949255	0.900658	0.857222	0.820738	0.792169	0.771914	0.759953	0.755906	0.759052	0.768375
404	0.949783	0.901677	0.858652	0.822478	0.794109	0.773946	0.761974	0.757825	0.7608	0.769905
405	0.950305	0.902684	0.860066	0.8242	0.796031	0.77596	0.763979	0.759733	0.762541	0.771431
406	0.950821	0.903678	0.861463	0.825902	0.797933	0.777956	0.765969	0.76163	0.764275	0.772954
407	0.95133	0.904661	0.862845	0.827587	0.799817	0.779935	0.767945	0.763515	0.766001	0.774474
408	0.951833	0.905633	0.864211	0.829254	0.801683	0.781896	0.769905	0.76539	0.76772	0.775991
409	0.95233	0.906593	0.865561	0.830903	0.80353	0.783841	0.771851	0.767252	0.769432	0.777504
410	0.952821	0.907542	0.866897	0.832535	0.805359	0.785768	0.773783	0.769104	0.771137	0.779013
411	0.953307	0.908479	0.868218	0.83415	0.807172	0.787679	0.7757	0.770945	0.772834	0.780519
412	0.953786	0.909407	0.869524	0.835748	0.808966	0.789574	0.777603	0.772774	0.774523	0.782021
413	0.95426	0.910323	0.870816	0.83733	0.810744	0.791453	0.779492	0.774593	0.776205	0.783519
414	0.954729	0.911229	0.872095	0.838896	0.812505	0.793315	0.781367	0.776401	0.77788	0.785013
415	0.955192	0.912126	0.873359	0.840446	0.81425	0.795163	0.783228	0.778198	0.779547	0.786503
416	0.955649	0.913012	0.87461	0.841981	0.815978	0.796994	0.785076	0.779984	0.781207	0.787989
417	0.956102	0.913888	0.875848	0.8435	0.817691	0.79881	0.786911	0.781759	0.78286	0.789472
418	0.956549	0.914755	0.877073	0.845004	0.819388	0.800612	0.788732	0.783524	0.784505	0.79095
419	0.956992	0.915612	0.878285	0.846494	0.821069	0.802398	0.79054	0.785278	0.786142	0.792423
420	0.95743	0.916461	0.879485	0.847968	0.822735	0.804169	0.792335	0.787022	0.787772	0.793893
421	0.957862	0.9173	0.880672	0.849429	0.824386	0.805927	0.794117	0.788755	0.789395	0.795358
422	0.95829	0.91813	0.881848	0.850875	0.826022	0.807669	0.795886	0.790478	0.79101	0.796819
423	0.958714	0.918951	0.883011	0.852308	0.827644	0.809398	0.797643	0.792191	0.792618	0.798275
424	0.959133	0.919764	0.884162	0.853727	0.829251	0.811113	0.799387	0.793894	0.794219	0.799727
425	0.959547	0.920568	0.885302	0.855132	0.830844	0.812814	0.801119	0.795586	0.795812	0.801175
426	0.959957	0.921364	0.886431	0.856524	0.832423	0.814501	0.802839	0.797269	0.797397	0.802617
427	0.960363	0.922152	0.887549	0.857904	0.833988	0.816175	0.804546	0.798941	0.798976	0.804056
428	0.960764	0.922932	0.888655	0.85927	0.83554	0.817836	0.806242	0.800604	0.800547	0.805489
429	0.961162	0.923704	0.889751	0.860624	0.837078	0.819484	0.807926	0.802256	0.80211	0.806919
430	0.961555	0.924468	0.890836	0.861965	0.838603	0.821119	0.809598	0.803899	0.803666	0.808343
431	0.961944	0.925224	0.891911	0.863294	0.840116	0.822741	0.811259	0.805533	0.805215	0.809763
432	0.962329	0.925973	0.892975	0.864611	0.841615	0.82435	0.812908	0.807156	0.806757	0.811178
433	0.96271	0.926714	0.89403	0.865916	0.843102	0.825947	0.814546	0.80877	0.808292	0.812588
434	0.963088	0.927449	0.895074	0.86721	0.844576	0.827532	0.816172	0.810375	0.809819	0.813994
435	0.963461	0.928176	0.896109	0.868492	0.846038	0.829105	0.817788	0.81197	0.811339	0.815394
436	0.963831	0.928896	0.897134	0.869762	0.847488	0.830665	0.819392	0.813556	0.812852	0.81679
437	0.964198	0.929609	0.898149	0.871021	0.848926	0.832214	0.820986	0.815133	0.814358	0.818182
438	0.964561	0.930315	0.899155	0.87227	0.850352	0.833751	0.822569	0.816701	0.815857	0.819568
439	0.96492	0.931015	0.900152	0.873507	0.851766	0.835277	0.824141	0.818259	0.817348	0.820949
440	0.965276	0.931708	0.90114	0.874734	0.853169	0.836791	0.825703	0.819809	0.818833	0.822326
441	0.965628	0.932394	0.902119	0.87595	0.854561	0.838294	0.827254	0.821349	0.82031	0.823698
442	0.965977	0.933075	0.903089	0.877156	0.855941	0.839786	0.828795	0.822881	0.821781	0.825065
443	0.966323	0.933748	0.904051	0.878351	0.85731	0.841267	0.830325	0.824403	0.823244	0.826427
444	0.966665	0.934416	0.905004	0.879537	0.858669	0.842736	0.831846	0.825918	0.824701	0.827784
445	0.967004	0.935078	0.905948	0.880712	0.860017	0.844196	0.833357	0.827423	0.826151	0.829137
446	0.96734	0.935733	0.906884	0.881878	0.861354	0.845644	0.834857	0.82892	0.827594	0.830484
447	0.967673	0.936383	0.907812	0.883034	0.86268	0.847082	0.836348	0.830408	0.82903	0.831827
448	0.968003	0.937026	0.908732	0.88418	0.863997	0.84851	0.837829	0.831888	0.830459	0.833165
449	0.96833	0.937664	0.909644	0.885317	0.865303	0.849928	0.839301	0.833359	0.831881	0.834497
450	0.968654	0.938297	0.910549	0.886444	0.866599	0.851335	0.840763	0.834822	0.833297	0.835825
451	0.968975	0.938923	0.911445	0.887563	0.867885	0.852732	0.842215	0.836277	0.834706	0.837148
452	0.969293	0.939545	0.912334	0.888672	0.869161	0.85412	0.843659	0.837723	0.836108	0.838467
453	0.969609	0.94016	0.913215	0.889772	0.870428	0.855498	0.845093	0.839161	0.837504	0.83978
454	0.969921	0.940771	0.914089	0.890864	0.871685	0.856866	0.846518	0.840592	0.838893	0.841088
455	0.970231	0.941376	0.914956	0.891947	0.872933	0.858224	0.847933	0.842014	0.840276	0.842392
456	0.970538	0.941976	0.915816	0.893021	0.874171	0.859573	0.84934	0.843428	0.841652	0.843691
457	0.970842	0.942571	0.916668	0.894087	0.8754	0.860913	0.850738	0.844835	0.843021	0.844984
458	0.971144	0.943161	0.917513	0.895144	0.87662	0.862243	0.852128	0.846233	0.844384	0.846273
459	0.971443	0.943746	0.918352	0.896194	0.877831	0.863565	0.853508	0.847624	0.845741	0.847558
460	0.97174	0.944326	0.919184	0.897235	0.879033	0.864877	0.85488	0.849008	0.847091	0.848837
461	0.972034	0.944901	0.920009	0.898268	0.880226	0.86618	0.856244	0.850383	0.848435	0.850112
462	0.972326	0.945471	0.920827	0.899293	0.881411	0.867475	0.857599	0.851751	0.849773	0.851381
463	0.972615	0.946037	0.921639	0.90031	0.882587	0.868761	0.858945	0.853112	0.851104	0.852646
464	0.972901	0.946598	0.922445	0.901319	0.883754	0.870038	0.860284	0.854465	0.852429	0.853906
465	0.973186	0.947154	0.923244	0.902321	0.884913	0.871307	0.861614	0.85581	0.853748	0.855162
466	0.973468	0.947706	0.924036	0.903315	0.886064	0.872567	0.862936	0.857149	0.855061	0.856412
467	0.973747	0.948254	0.924823	0.904302	0.887207	0.873819	0.86425	0.85848	0.856367	0.857658
468	0.974025	0.948797	0.925603	0.905282	0.888342	0.875062	0.865556	0.859804	0.857668	0.858899
469	0.9743	0.949335	0.926378	0.906254	0.889468	0.876298	0.866854	0.861121	0.858962	0.860135
470	0.974573	0.94987	0.927146	0.907219	0.890587	0.877525	0.868145	0.86243	0.860251	0.861367
471	0.974843	0.9504	0.927909	0.908177	0.891698	0.878744	0.869428	0.863733	0.861533	0.862594
472	0.975112	0.950926	0.928666	0.909128	0.892801	0.879956	0.870703	0.865028	0.86281	0.863816
473	0.975378	0.951448	0.929417	0.910072	0.893897	0.881159	0.87197	0.866317	0.86408	0.865034
474	0.975643	0.951966	0.930162	0.911009	0.894985	0.882355	0.87323	0.867599	0.865345	0.866246
475	0.975905	0.95248	0.930902	0.911939	0.896066	0.883543	0.874482	0.868874	0.866603	0.867455
476	0.976165	0.95299	0.931636	0.912863	0.897139	0.884724	0.875728	0.870142	0.867856	0.868658
477	0.976423	0.953496	0.932365	0.91378	0.898205	0.885897	0.876965	0.871404	0.869104	0.869857
478	0.976679	0.953998	0.933088	0.914691	0.899264	0.887063	0.878196	0.872659	0.870345	0.871052
479	0.976933	0.954496	0.933806	0.915595	0.900316	0.888221	0.879419	0.873907	0.871581	0.872241
480	0.977185	0.954991	0.934519	0.916493	0.90136	0.889372	0.880636	0.875149	0.872811	0.873427
